# Supplementary material for: Identification of Potential miRNA–mRNA Regulatory Network Associated with Growth and Development of Hair Follicles in Forest Musk Deer
Source: Animals (Basel). 2023 Dec 15;13(24):3869. doi: 10.3390/ani13243869 (PMC10740511; doi:10.3390/ani13243869)
Supplement: Supplementary file 1 [file animals-13-03869-s001.zip]

Archive with 16 entries (16 files):
- Supplementary Table S13.xlsx
- Supplementary Table S14.xlsx
- Supplementary Table S15.xlsx
- Supplementary Figure S1.pdf
- Supplementary Table S1.xlsx
- Supplementary Table S2.xlsx
- Supplementary Table S3.xlsx
- Supplementary Table S4.xlsx
- Supplementary Table S5.xlsx
- Supplementary Table S6.xlsx
- Supplementary Table S7.xlsx
- Supplementary Table S8.xlsx
- Supplementary Table S9.xlsx
- Supplementary Table S10.xlsx
- Supplementary Table S11.xlsx
- Supplementary Table S12.xlsx
