# Supplementary material for: Identification of Potential miRNA–mRNA Regulatory Network Associated with Growth and Development of Hair Follicles in Forest Musk Deer
Source: Animals (Basel). 2023 Dec 15;13(24):3869. doi: 10.3390/ani13243869 (PMC10740511; doi:10.3390/ani13243869)
Supplement: Supplementary file 1 [file animals-13-03869-s001.zip › Supplementary Table S1.xlsx]

## Sheet: Sheet1
Supplementary Table S1. Primer information of DEGs and miRNAs used for RT-qPCR
Gene ID	Sequences of primer pairs (-3')		product size
WNT7A	F: GCTCTGCCGACATCCGCTAC	R: GCACTCCAGCTTCATGTTCTCCT	146
WNT7B	F: TCCGAGTAGGGAGCCGTGAG	R: GCCTGGTTGTAGTAGCCCTGTTT	142
WNT16	F: CAGAAATACCACGGCAAAG	R: GACAACGGCAGTCTAAGGAC	110
FZD1	F: GGCACGAAGACCGAGAAGC	R: GAAGTAGCAGGCGATGACGAT	99
FZD8	F: TCGGTCATCAAGCAGCAGGGTG	R: AGAGGCAGGCGACCACAACG	121
FZD9	F: CTGTCCTGCTACCTGGTGCTG	R: CTTCTCCGTGTTGGTGCCTC	105
SFRP1	F: CAACCTGCTGGAGCACGAGAC	R: AAGAGCGAGCACAGGAAGACC	114
ITGA5	F: ACATCGCCCTCAATTTCTC	R: TGTCCTCTATGCGGCTCTT	99
CAMK2B	F: CCTCAAGCCCGAGAACCT	R: CCAGCGAATCCAAACCAC	120
NTRK2	F: TTTTCCTCGCTGAATGCTAT	R: CTCGTGCTGGAGGTTGGT	140
let-7d	F:CGCGAGAGGTAGTAGGTTGCAT	R: AGTGCAGGGTCCGAGGTATT
let-7e	F:CGCGTGAGGTAGGAGGTTG	R: AGTGCAGGGTCCGAGGTATT
miR-31-5p	F:GCGAGGCAAGATGCTGGC	R: AGTGCAGGGTCCGAGGTATT
miR-34b-5p	F:CGCGTGGCAGTGTCTTAGC	R: AGTGCAGGGTCCGAGGTATT
miR-125a-3p	F:GCTGTAAACATCCTTCACTCTCAGC	R: AGTGCAGGGTCCGAGGTATT
miR-143-3p	F:CGCGTGAGATGAAGCACTGT	R: AGTGCAGGGTCCGAGGTATT
miR-149-5p	F:CGTCTGGCTCCGTGTCTTC	R: AGTGCAGGGTCCGAGGTATT
miR-193a-5p	F:TGGGTCTTTGCGGGCG	R: AGTGCAGGGTCCGAGGTATT
miR-324-3p	F:GCCACTGCCCCAGGTGC	R: AGTGCAGGGTCCGAGGTATT
miR-362-5p	F:GCGAATCCTTGGAACCTAGGT	R: AGTGCAGGGTCCGAGGTATT
miR-877-5p	F:GCGGTAGAGGAGATGGCG	R: AGTGCAGGGTCCGAGGTATT
U6 snRNA	F:ATTGGAACGATACAGAGAAGATT	R: GGAACGCTTCACGAATTTG
