# Supplementary material for: Identification of Potential miRNA–mRNA Regulatory Network Associated with Growth and Development of Hair Follicles in Forest Musk Deer
Source: Animals (Basel). 2023 Dec 15;13(24):3869. doi: 10.3390/ani13243869 (PMC10740511; doi:10.3390/ani13243869)
Supplement: Supplementary file 1 [file animals-13-03869-s001.zip › Supplementary Table S2.xlsx]

## Sheet: Sheet1
Supplementary Table S2 Summary of transcriptome data of HFs at anagen stage and catagen stage in the FMD
Group	Sample name	Paired-end	Read length (bp)	Total Bases (Gb)	Paired-end clean reads	clean bases (Gb)	% of clean reads	GC content (%)
		raw reads
Catagen stage	AWHF1M	115730104	150	17.36	114091830	17.11	93.57	55.91
	AWHF2M	167067714	150	25.06	165544882	24.83	93.2	55.33
	CWHF2M	115824170	150	17.37	113183868	16.98	93.93	52.94
Anagen stage	CBHF1F	120133342	150	18.02	118816586	17.82	93.33	53.81
	CBHF2F	151395800	150	22.71	149962292	22.49	92.65	54.7
	CBHF3F	99862432	150	14.98	97949342	14.69	94.26	52.37
	CBHF4F	121127672	150	18.17	116761552	17.51	94.19	53.43
	CBHF5M	154000294	150	23.1	148932894	22.34	94.2	54.28
	CBHF6F	115296988	150	17.3	111199446	16.68	94.15	52.97
	CBHF7F	122302916	150	18.35	118246560	17.74	94.05	54.04
	CBHF8M	122590852	150	18.29	118940996	17.84	93.89	52.93
	CBHF9M	122104128	150	18.32	118818024	17.82	93.94	52.69
	CBHF10M	141227952	150	21.18	137296292	20.59	94.2	53.02
Total		1905647222	2250	285.75	18,60,684,074	279.08	93.85	53.64
