# Supplementary material for: Identification of Potential miRNA–mRNA Regulatory Network Associated with Growth and Development of Hair Follicles in Forest Musk Deer
Source: Animals (Basel). 2023 Dec 15;13(24):3869. doi: 10.3390/ani13243869 (PMC10740511; doi:10.3390/ani13243869)
Supplement: Supplementary file 1 [file animals-13-03869-s001.zip › Supplementary Table S3.xlsx]

## Sheet: Sheet1
Supplementary Table S3 FPKM statistics (count and percentage) of HF transcriptome at anagen stage and catagen stage in the FMD
FPKM Interval	Catagen stage			Anagen stage
	AWHF1M	AWHF2M	CWHF2M	CBHF1F	CBHF2F	CBHF3F	CBHF4F	CBHF5M	CBHF6F	CBHF7F	CBHF8M	CBHF9M	CBHF10M
FPKM<0.5	3685(23.46%)	4382(26.27%)	4526（25.49%）	3956(24.94%)	4463(27.85%)	4013(25.16%)	4181（26.33%）	4432(27.23%)	4155（26.10%）	4308（26.52%）	4321（27.19%）	4323（26.51%）	4454(27.92%)
0.5≤FPKM＜1	1033(6.58%)	1026(6.15%)	987（5.91%）	946(5.96%)	988(6.16%)	932(5.84%)	980（6.17%）	984(6.05%)	977（6.14%）	994（6.12%）	1005（6.32%）	895（5.49%）	995(6.24%)
1≤FPKM＜10	5270(33.55%)	5207(31.21%)	4927（29.51%）	4963(31.28%)	5074(31.67%)	4863(30.49%)	5023（31.64%）	5031(30.91%)	4989（31.34%）	5061（31.15%）	4972（31.29%）	4936（30.27%）	4940(30.96%)
10≤FPKM≤500	5561(35.40%)	5902（35.38%）	6373（38.17%）	5819(36.68%)	5330(33.26%)	5985（37.53%）	5522（34.78%）	5665(34.80%)	5630（35.37%）	5716（35.18%）	5431（34.17%）	5988（36.72%）	5397(33.83%)
FPKM＞500	160(1.02%)	165（0.99%）	153（0.92%）	180(36.68%)	168(1.05%)	154（0.97%）	169（1.06%）	165(1.01%)	167（1.05%）	167（1.03%）	163（1.03%）	165（1.01%）	169(1.06%)
Total	15709	16682	16696	15864	16023	15947	15875	16277	15918	16246	15892	16307	15955
