# Supplementary material for: Identification of Potential miRNA–mRNA Regulatory Network Associated with Growth and Development of Hair Follicles in Forest Musk Deer
Source: Animals (Basel). 2023 Dec 15;13(24):3869. doi: 10.3390/ani13243869 (PMC10740511; doi:10.3390/ani13243869)
Supplement: Supplementary file 1 [file animals-13-03869-s001.zip › Supplementary Table S4.xlsx]

## Sheet: Sheet1
Supplementary Table S4 The lists of DE unigenes from RNA sequencing of HFs (padj<0.05 and |log2(fold change)|≥2) at anagen stage and catagen stage in the FMD
Gene ID	gene_Symbol	Gene_type	log2FoldChange	lfcSE	pvalue	padj
evm.model.scaffold541.18503	ESR1	mRNA	-8.61821	0.795682	2.44871e-27	1.35379e-24
evm.model.scaffold47.4224	MISP	mRNA	-7.01803	2.59966	0.00694243	0.0269887
evm.model.scaffold480.17747	ERICH3	mRNA	-6.84735	1.12499	1.15346e-09	3.85651e-08
evm.model.scaffold454.17353	REM1	mRNA	-6.83833	1.23843	3.35632e-08	7.54075e-07
evm.model.scaffold133.9666	MMP28	mRNA	-6.66582	1.3408	6.64311e-07	1.06235e-05
evm.model.scaffold1523.23716	SERPINB6	mRNA	-6.38981	0.993474	1.26119e-10	5.09745e-09
evm.model.scaffold4.389	phactr1	mRNA	-6.13227	1.4067	1.30452e-05	0.000142081
evm.model.scaffold25.2486	KCNA6	mRNA	-6.06862	1.93217	0.00168472	0.00849493
evm.model.scaffold516.18216	ST8SIA2	mRNA	-6.05954	1.37751	1.08794e-05	0.000121423
evm.model.scaffold6.675	SRL	mRNA	-5.97782	1.2377	1.36688e-06	2.02675e-05
evm.model.scaffold749.20525	Zdhhc14	mRNA	-5.94173	1.33918	9.1287e-06	0.000104909
evm.model.scaffold87.7331	TOX	mRNA	-5.9291	2.24147	0.00816474	0.030707
evm.model.scaffold977.21988	Fam78b	mRNA	-5.8697	1.637	0.000336229	0.0022547
evm.model.scaffold32.3126	PPP1R3C	mRNA	-5.80694	0.396889	1.778e-48	6.88085e-45
evm.model.scaffold487.17841	Krt36	mRNA	-5.69434	0.615913	2.34455e-20	5.58363e-18
evm.model.scaffold531.18409	PLLP	mRNA	-5.67322	0.549909	5.92643e-25	2.41424e-22
evm.model.scaffold80.6998	LAYN	mRNA	-5.65246	0.826347	7.90333e-12	4.32309e-10
evm.model.scaffold792.20871	KLRF1	mRNA	-5.64085	1.60301	0.000433308	0.00278903
evm.model.scaffold749.20523	ZDHHC14	mRNA	-5.63719	1.04402	6.68268e-08	1.38299e-06
evm.model.scaffold216.12183	DOK7	mRNA	-5.52733	2.00872	0.0059293	0.023828
evm.model.scaffold28.2738	IL31RA	mRNA	-5.48012	0.526049	2.0628e-25	9.12347e-23
evm.model.scaffold96.7978	ZBP1	mRNA	-5.43707	1.54686	0.000439903	0.00282443
evm.model.scaffold27.2685	CCBE1	mRNA	-5.42557	0.642553	3.07282e-17	4.45106e-15
evm.model.scaffold351.15333	Mag	mRNA	-5.37822	1.50045	0.000337862	0.00226215
evm.model.scaffold497.17984	MAMLD1	mRNA	-5.33879	0.697712	1.98098e-14	1.6666e-12
evm.model.scaffold1923.24133	CPA6	mRNA	-5.31694	1.20056	9.47908e-06	0.000108372
evm.model.scaffold90.7693	GRIK3	mRNA	-5.26808	1.47803	0.000364876	0.00241173
evm.model.scaffold26.2622	PDE7B	mRNA	-5.23481	0.891167	4.25116e-09	1.22547e-07
evm.model.scaffold39.3591	CDH17	mRNA	-5.22491	1.53167	0.000646675	0.00386507
evm.model.scaffold685.20043	GREM1	mRNA	-5.21985	1.88152	0.00553242	0.0225255
evm.model.scaffold124.9229	CYP4A6	mRNA	-5.1923	1.76461	0.00325612	0.0145974
evm.model.scaffold705.20217	DGKI	mRNA	-5.15804	1.7672	0.00351417	0.0155917
evm.model.scaffold24.2296	HS3ST3A1	mRNA	-5.12216	1.26872	5.40747e-05	0.000478877
evm.model.scaffold519.18265	--	mRNA	-5.11096	1.706	0.00273659	0.0126948
evm.model.scaffold901.21605	CBLN4	mRNA	-5.04131	1.28274	8.49019e-05	0.000705465
evm.model.scaffold12.1247	ZNF652	mRNA	-5.03362	0.561831	3.2671e-19	6.40185e-17
evm.model.scaffold258.13472	SHC3	mRNA	-4.99817	1.07407	3.264e-06	4.32963e-05
evm.model.scaffold30.2908	Ntng2	mRNA	-4.99702	1.47528	0.000706155	0.00415954
evm.model.scaffold47.4143	CXCL14	mRNA	-4.98349	0.658792	3.89104e-14	3.12089e-12
evm.model.scaffold1430.23528	ZCCHC18	mRNA	-4.92222	1.60084	0.00210664	0.0102485
evm.model.scaffold469.17610	KIAA1324L	mRNA	-4.90097	1.15755	2.29665e-05	0.000229221
evm.model.scaffold45.4005	FOXC2	mRNA	-4.85397	0.916345	1.17657e-07	2.30793e-06
evm.model.scaffold798.20908	GAS2	mRNA	-4.83108	0.363311	2.39735e-40	3.09258e-37
evm.model.scaffold692.20092	KLHL38	mRNA	-4.76691	0.763043	4.17789e-10	1.50755e-08
evm.model.scaffold120.9082	ZFR2	mRNA	-4.74415	1.383	0.000602823	0.00365259
evm.model.scaffold50.4590	WNT7A	mRNA	-4.67314	1.71187	0.00633647	0.0250481
evm.model.scaffold387.16190	PDLIM3	mRNA	-4.65913	0.732801	2.0444e-10	7.89209e-09
evm.model.scaffold306.14449	FAM105A	mRNA	-4.6377	0.34497	3.34901e-41	5.18427e-38
evm.model.scaffold70.6373	Zdhhc1	mRNA	-4.62916	0.254083	3.64338e-74	2.81998e-70
evm.model.scaffold124.9230	CYP4X1	mRNA	-4.61499	1.46042	0.00157746	0.00805381
evm.model.scaffold905.21626	--	mRNA	-4.6018	1.50494	0.00222972	0.0107293
evm.model.scaffold121.9181	IGFBPL1	mRNA	-4.54831	1.79396	0.0112336	0.0395219
evm.model.scaffold117.8835	SLC1A6	mRNA	-4.48022	0.968347	3.71595e-06	4.84891e-05
evm.model.scaffold258.13473	SHC3	mRNA	-4.47837	1.24961	0.000338617	0.00226525
evm.model.scaffold156.10553	KDR	mRNA	-4.44373	0.456128	1.99015e-22	6.55479e-20
evm.model.scaffold694.20112	TSPAN1	mRNA	-4.43036	0.608441	3.30171e-13	2.30314e-11
evm.model.scaffold100.8105	env	mRNA	-4.42299	1.20887	0.000253403	0.00176856
evm.model.scaffold127.9368	FGFR1	mRNA	-4.41819	0.606775	3.30295e-13	2.30314e-11
evm.model.scaffold55.5585	PLAC9	mRNA	-4.3782	0.59342	1.60784e-13	1.15229e-11
evm.model.scaffold375.15952	Rab6b	mRNA	-4.34879	0.811838	8.47419e-08	1.70143e-06
evm.model.scaffold701.20202	GRIN3A	mRNA	-4.34542	1.25282	0.000523364	0.00324587
evm.model.scaffold148.10260	PAQR6	mRNA	-4.33181	0.34756	1.18095e-35	1.01562e-32
evm.model.scaffold467.17586	SLC38A4	mRNA	-4.31517	1.0664	5.19924e-05	0.00046282
evm.model.scaffold21.2160	Wfdc3	mRNA	-4.30814	0.289264	3.63617e-50	1.87626e-46
evm.model.scaffold104.8408	WNT16	mRNA	-4.30666	1.3014	0.000935469	0.00523722
evm.model.scaffold80.7030	ZBTB16	mRNA	-4.29034	0.325239	9.83978e-40	1.088e-36
evm.model.scaffold12.1229	SGCA	mRNA	-4.24432	0.871393	1.1119e-06	1.68748e-05
evm.model.scaffold638.19688	ULBP3	mRNA	-4.23122	1.50959	0.00506458	0.0209298
evm.model.scaffold1055.22339	PTCHD1	mRNA	-4.21868	1.01803	3.41358e-05	0.000322996
evm.model.scaffold926.21746	PALLD	mRNA	-4.21044	0.517265	3.95902e-16	4.71428e-14
evm.model.scaffold444.17217	Pinlyp	mRNA	-4.20056	0.670661	3.76893e-10	1.37278e-08
evm.model.scaffold701.20201	GRIN3A	mRNA	-4.19651	0.636536	4.31794e-11	2.00125e-09
evm.model.scaffold3.276	Tnc	mRNA	-4.1865	0.6287	2.75732e-11	1.3519e-09
evm.model.scaffold384.16141	DUOX2	mRNA	-4.15509	0.493812	3.95192e-17	5.51133e-15
evm.model.scaffold196.11682	CD55	mRNA	-4.1378	0.799148	2.24562e-07	4.09931e-06
evm.model.scaffold75.6695	DNER	mRNA	-4.12087	0.449087	4.46953e-20	1.04831e-17
evm.model.scaffold120.9081	MATK	mRNA	-4.09608	0.3187	8.3332e-38	8.06237e-35
evm.model.scaffold340.15061	CAV1	mRNA	-4.09298	0.324402	1.70188e-36	1.54971e-33
evm.model.scaffold173.11001	VWC2	mRNA	-4.08806	1.30041	0.00166839	0.00843183
evm.model.scaffold227.12492	PTPRD	mRNA	-4.07937	0.601028	1.14239e-11	6.03557e-10
evm.model.scaffold6.817	PDIA2	mRNA	-4.07233	0.676053	1.70494e-09	5.5099e-08
evm.model.scaffold34.3279	COX6B1	mRNA	-4.06398	1.06407	0.000133836	0.00103228
evm.model.scaffold393.16282	ATOH8	mRNA	-4.04114	0.97245	3.24391e-05	0.000308841
evm.model.scaffold403.16491	DDAH2	mRNA	-4.01366	0.19362	1.87546e-95	2.90321e-91
evm.model.scaffold450.17270	KIAA1024	mRNA	-4.00774	0.639112	3.59225e-10	1.32259e-08
evm.model.scaffold835.21206	CCDC184	mRNA	-4.00148	1.06877	0.000181113	0.00133126
evm.model.scaffold372.15910	HCN1	mRNA	-3.98906	1.55574	0.0103444	0.0369824
evm.model.scaffold291.14177	--	mRNA	-3.98591	1.20067	0.000900974	0.00508275
evm.model.scaffold247.13101	PLXNA4	mRNA	-3.96539	1.33651	0.00300742	0.0137087
evm.model.scaffold764.20654	PROKR2	mRNA	-3.9568	1.62414	0.0148406	0.0493624
evm.model.scaffold116.8795	PER2	mRNA	-3.93799	0.329748	7.11167e-33	5.24232e-30
evm.model.scaffold1432.23534	KLKB1	mRNA	-3.92882	0.605364	8.58305e-11	3.64016e-09
evm.model.scaffold258.13455	ALDOB	mRNA	-3.88041	0.70231	3.29105e-08	7.43728e-07
evm.model.scaffold224.12439	CNTN1	mRNA	-3.86533	1.24685	0.00193473	0.00953808
evm.model.scaffold285.14102	NR3C2	mRNA	-3.8523	0.399672	5.49129e-22	1.7348e-19
evm.model.scaffold95.7944	MEIS2	mRNA	-3.84385	0.681512	1.6987e-08	4.12808e-07
evm.model.scaffold406.16626	TPPP2	mRNA	-3.83551	0.945578	4.98657e-05	0.000446455
evm.model.scaffold221.12377	PIEZO2	mRNA	-3.81786	0.84313	5.94901e-06	7.29142e-05
evm.model.scaffold298.14290	MCF2L	mRNA	-3.81522	0.381301	1.43744e-23	5.17478e-21
evm.model.scaffold394.16312	SOWAHD	mRNA	-3.81044	1.19025	0.00136774	0.00721629
evm.model.scaffold42.3889	CDH4	mRNA	-3.79913	0.859904	9.95802e-06	0.000112765
evm.model.scaffold351.15211	LTBP4	mRNA	-3.7892	0.317955	9.60606e-33	6.75917e-30
evm.model.scaffold413.16776	GDF10	mRNA	-3.78907	1.05386	0.000323876	0.00218553
evm.model.scaffold274.13767	RORC	mRNA	-3.78827	0.277108	1.51833e-42	2.93797e-39
evm.model.scaffold1653.23894	MAGEA10	mRNA	-3.78532	0.876607	1.57341e-05	0.000167283
evm.model.scaffold891.21560	RYR3	mRNA	-3.77209	0.396975	2.05732e-21	5.79042e-19
evm.model.scaffold70.6372	LRRC36	mRNA	-3.76981	1.51775	0.0129983	0.0444966
evm.model.scaffold96.7998	SNPH	mRNA	-3.7667	0.458366	2.07506e-16	2.6547e-14
evm.model.scaffold840.21251	Tbx1	mRNA	-3.74661	0.346093	2.60802e-27	1.39214e-24
evm.model.scaffold162.10694	HPSE	mRNA	-3.74096	0.665881	1.93117e-08	4.642e-07
evm.model.scaffold677.19974	UNC13C	mRNA	-3.72785	1.09928	0.00069597	0.00410267
evm.model.scaffold165.10758	TRPC4	mRNA	-3.72703	0.525967	1.37997e-12	8.64854e-11
evm.model.scaffold374.15931	SSPN	mRNA	-3.72638	0.431954	6.30914e-18	1.01735e-15
evm.model.scaffold384.16139	DUOXA1	mRNA	-3.67537	0.423349	3.90048e-18	6.42335e-16
evm.model.scaffold435.17081	DAB2	mRNA	-3.6718	0.761823	1.43735e-06	2.10902e-05
evm.model.scaffold200.11734	COL17A1	mRNA	-3.67081	0.536945	8.1161e-12	4.40832e-10
evm.model.scaffold391.16267	TNFRSF11B	mRNA	-3.63828	0.421824	6.40296e-18	1.02183e-15
evm.model.scaffold797.20904	Cpne4	mRNA	-3.63656	0.934367	9.94213e-05	0.000807472
evm.model.scaffold394.16320	Tmem255a	mRNA	-3.62745	1.43933	0.0117276	0.0408973
evm.model.scaffold216.12226	Spon2	mRNA	-3.61499	1.21461	0.00291802	0.013384
evm.model.scaffold181.11247	Fzd8	mRNA	-3.59558	0.290989	4.49707e-35	3.66393e-32
evm.model.scaffold565.18818	GLIS3	mRNA	-3.59184	1.03023	0.000489497	0.00306778
evm.model.scaffold72.6527	THY1	mRNA	-3.58023	0.794027	6.51493e-06	7.90989e-05
evm.model.scaffold71.6448	ZNF853	mRNA	-3.57682	0.561452	1.88209e-10	7.32027e-09
evm.model.scaffold85.7218	SEMA3E	mRNA	-3.57408	0.247999	4.36875e-47	9.66118e-44
evm.model.scaffold943.21831	LY6D	mRNA	-3.56575	0.548033	7.6949e-11	3.29383e-09
evm.model.scaffold360.15531	NDUFA4L2	mRNA	-3.55574	0.395011	2.22419e-19	4.47149e-17
evm.model.scaffold527.18343	IL7	mRNA	-3.55352	1.00771	0.000421359	0.00271777
evm.model.scaffold113.8721	BANK1	mRNA	-3.54134	1.00933	0.000450463	0.00287441
evm.model.scaffold241.12997	HOXA1	mRNA	-3.52708	1.03998	0.000695093	0.00409906
evm.model.scaffold744.20482	PLCE1	mRNA	-3.51657	0.471665	8.94297e-14	6.65563e-12
evm.model.scaffold883.21515	NLRP12	mRNA	-3.50793	0.522364	1.87427e-11	9.63913e-10
evm.model.scaffold182.11288	PDE8B	mRNA	-3.47705	0.240183	1.70041e-47	4.38707e-44
evm.model.scaffold140.9954	LHX2	mRNA	-3.47648	0.333303	1.8015e-25	8.20212e-23
evm.model.scaffold201.11761	PEG10	mRNA	-3.46713	1.07064	0.00120212	0.00646676
evm.model.scaffold116.8798	ERFE	mRNA	-3.46685	0.930509	0.00019473	0.00141389
evm.model.scaffold51.4673	PPP2R2B	mRNA	-3.46658	0.265752	6.83805e-39	7.05687e-36
evm.model.scaffold69.6333	SPTB	mRNA	-3.45985	0.3516	7.54961e-23	2.59707e-20
evm.model.scaffold978.22000	SLC38A5	mRNA	-3.45942	0.62516	3.13628e-08	7.12917e-07
evm.model.scaffold216.12178	Adra2c	mRNA	-3.45341	0.883073	9.20418e-05	0.000755065
evm.model.scaffold367.15739	NFATC4	mRNA	-3.4418	0.590786	5.684e-09	1.55182e-07
evm.model.scaffold435.17065	GDNF	mRNA	-3.43691	1.12999	0.00235373	0.0112076
evm.model.scaffold54.5565	INHBA	mRNA	-3.4239	0.714799	1.66765e-06	2.3903e-05
evm.model.scaffold564.18774	smpd5	mRNA	-3.41214	1.12799	0.00248656	0.0116855
evm.model.scaffold250.13244	FSTL1	mRNA	-3.40104	0.355153	1.00628e-21	2.93908e-19
evm.model.scaffold11.1123	GAD1	mRNA	-3.39667	1.21417	0.00514973	0.0212185
evm.model.scaffold676.19971	HMGCLL1	mRNA	-3.39345	1.25588	0.00689135	0.0268237
evm.model.scaffold308.14477	ZBTB10	mRNA	-3.38454	0.521204	8.37568e-11	3.56196e-09
evm.model.scaffold75.6653	FNDC5	mRNA	-3.37718	0.589996	1.03996e-08	2.66093e-07
evm.model.scaffold802.20920	ZDHHC2	mRNA	-3.37459	1.30077	0.00947831	0.034564
evm.model.scaffold37.3468	MAP1B	mRNA	-3.3647	0.406166	1.19042e-16	1.54855e-14
evm.model.scaffold223.12410	PRUNE2	mRNA	-3.35655	0.811118	3.50074e-05	0.000330432
evm.model.scaffold1432.23535	TLR3	mRNA	-3.34964	0.6036	2.86598e-08	6.59219e-07
evm.model.scaffold274.13819	MTMR11	mRNA	-3.34604	0.434364	1.32598e-14	1.15316e-12
evm.model.scaffold22.2174	RASL12	mRNA	-3.32832	0.676313	8.59853e-07	1.33506e-05
evm.model.scaffold114.8750	Tmem229a	mRNA	-3.32597	0.369184	2.08002e-19	4.23667e-17
evm.model.scaffold56.5642	Sdk2	mRNA	-3.31946	0.322016	6.45935e-25	2.56386e-22
evm.model.scaffold168.10834	DMRT3	mRNA	-3.31362	0.878167	0.000161076	0.00120748
evm.model.scaffold1059.22353	KIRREL1	mRNA	-3.30891	0.803944	3.85771e-05	0.000358233
evm.model.scaffold257.13419	NFATC1	mRNA	-3.29804	0.294513	4.15662e-29	2.68102e-26
evm.model.scaffold129.9459	MEX3B	mRNA	-3.2951	1.2027	0.00614856	0.0244804
evm.model.scaffold69.6332	SPTB	mRNA	-3.29341	0.570069	7.59471e-09	2.01312e-07
evm.model.scaffold234.12750	EMP3	mRNA	-3.27349	0.383011	1.26637e-17	1.96035e-15
evm.model.scaffold101.8256	Mapk11	mRNA	-3.27014	0.537814	1.19859e-09	3.97306e-08
evm.model.scaffold69.6301	PLEKHD1	mRNA	-3.25856	0.585112	2.56039e-08	5.97293e-07
evm.model.scaffold54.5530	ADCY1	mRNA	-3.248	0.396768	2.69712e-16	3.26183e-14
evm.model.scaffold101.8201	WNT7B	mRNA	-3.24705	0.588133	3.37164e-08	7.56175e-07
evm.model.scaffold1418.23505	Hs6st2	mRNA	-3.2395	0.614965	1.38077e-07	2.67514e-06
evm.model.scaffold45.3968	CDH13	mRNA	-3.22682	0.307322	8.65698e-26	4.06091e-23
evm.model.scaffold89.7664	Grik2	mRNA	-3.22091	1.31393	0.0142317	0.0477576
evm.model.scaffold610.19365	ARHGEF6	mRNA	-3.20988	0.512044	3.63923e-10	1.33496e-08
evm.model.scaffold646.19745	ST8SIA4	mRNA	-3.20358	0.706476	5.7715e-06	7.11895e-05
evm.model.scaffold384.16138	DUOX1	mRNA	-3.19867	0.372935	9.73723e-18	1.52255e-15
evm.model.scaffold639.19714	TLR2	mRNA	-3.1939	0.407613	4.66546e-15	4.60009e-13
evm.model.scaffold571.18904	YPEL1	mRNA	-3.19015	0.784182	4.73932e-05	0.000427782
evm.model.scaffold516.18218	SLCO3A1	mRNA	-3.18124	0.363002	1.88931e-18	3.32347e-16
evm.model.scaffold48.4348	PLCL1	mRNA	-3.17462	0.76461	3.29653e-05	0.00031307
evm.model.scaffold85.7215	PCLO	mRNA	-3.17059	0.949324	0.000838269	0.00479889
evm.model.scaffold311.14510	TENM1	mRNA	-3.16501	0.538084	4.05354e-09	1.17507e-07
evm.model.scaffold799.20910	KLF12	mRNA	-3.16408	0.439696	6.19726e-13	4.17103e-11
evm.model.scaffold6.818	ARHGDIG	mRNA	-3.15467	0.45942	6.57383e-12	3.68706e-10
evm.model.scaffold810.21038	AMTN	mRNA	-3.15453	1.09664	0.00402063	0.0174242
evm.model.scaffold45.3991	--	mRNA	-3.15356	0.501866	3.30646e-10	1.23039e-08
evm.model.scaffold164.10746	C4orf19	mRNA	-3.14122	1.05699	0.00296004	0.0135377
evm.model.scaffold34.3192	CLIP4	mRNA	-3.13864	0.27103	5.17919e-31	3.48582e-28
evm.model.scaffold26.2610	SBSPON	mRNA	-3.13051	0.821482	0.00013851	0.0010625
evm.model.scaffold610.19371	Fhl1	mRNA	-3.12115	0.564945	3.30062e-08	7.4444e-07
evm.model.scaffold49.4511	OTOP3	mRNA	-3.11713	1.11589	0.00521576	0.0214295
evm.model.scaffold904.21620	PRR16	mRNA	-3.11602	1.02896	0.00245918	0.0115897
evm.model.scaffold804.20968	ZAN	mRNA	-3.10711	0.527163	3.76926e-09	1.10508e-07
evm.model.scaffold61.5951	Ncald	mRNA	-3.0969	0.760978	4.70871e-05	0.000425516
evm.model.scaffold320.14682	ADGRG2	mRNA	-3.08402	0.45327	1.01797e-11	5.45266e-10
evm.model.scaffold48.4353	RFTN2	mRNA	-3.07663	0.7983	0.000116215	0.000918796
evm.model.scaffold430.17012	FAM181B	mRNA	-3.07319	0.409847	6.4608e-14	4.97578e-12
evm.model.scaffold298.14273	RASA3	mRNA	-3.06782	0.393643	6.52282e-15	6.23292e-13
evm.model.scaffold275.13879	HIP1	mRNA	-3.06351	0.49278	5.07456e-10	1.8017e-08
evm.model.scaffold20.1997	Hes5	mRNA	-3.03671	0.742752	4.34233e-05	0.000396574
evm.model.scaffold1.17	RPRM	mRNA	-3.02183	0.767926	8.31774e-05	0.000694491
evm.model.scaffold134.9699	SLIT2	mRNA	-3.01764	0.37203	5.00828e-16	5.78569e-14
evm.model.scaffold223.12409	PRUNE2	mRNA	-3.00517	0.775229	0.000105973	0.000851302
evm.model.scaffold513.18193	Fgf13	mRNA	-2.99713	0.63049	1.9978e-06	2.78613e-05
evm.model.scaffold13.1356	TMEM121	mRNA	-2.9915	0.520912	9.31207e-09	2.41055e-07
evm.model.scaffold865.21421	TNFSF10	mRNA	-2.99131	0.918925	0.00113302	0.0061584
evm.model.scaffold340.15060	CAV2	mRNA	-2.98335	0.222825	7.03542e-41	9.90076e-38
evm.model.scaffold67.6205	LMCD1	mRNA	-2.98278	0.244648	3.42428e-34	2.65039e-31
evm.model.scaffold678.19989	FOXI3	mRNA	-2.98233	1.16761	0.0106429	0.0378479
evm.model.scaffold699.20193	GAS1	mRNA	-2.97241	0.396267	6.33219e-14	4.92574e-12
evm.model.scaffold333.14976	SLC8A1	mRNA	-2.97234	0.49842	2.46877e-09	7.61287e-08
evm.model.scaffold412.16756	Akt3	mRNA	-2.96396	0.219157	1.1233e-41	1.93207e-38
evm.model.scaffold422.16882	HPRT1	mRNA	-2.96008	0.871773	0.000685108	0.00405861
evm.model.scaffold67.6256	ZBTB47	mRNA	-2.95694	0.280025	4.5877e-26	2.29089e-23
evm.model.scaffold320.14692	Rai2	mRNA	-2.95226	1.04317	0.00465357	0.01957
evm.model.scaffold373.15916	LGR5	mRNA	-2.9432	0.322559	7.2049e-20	1.59331e-17
evm.model.scaffold747.20514	TXNIP	mRNA	-2.93979	0.312901	5.70778e-21	1.49757e-18
evm.model.scaffold37.3511	NEURL1B	mRNA	-2.9248	0.578143	4.21571e-07	7.13216e-06
evm.model.scaffold41.3679	TNNC1	mRNA	-2.92196	0.881756	0.000920403	0.005166
evm.model.scaffold59.5863	FZD2	mRNA	-2.91465	0.489119	2.53811e-09	7.78019e-08
evm.model.scaffold466.17527	ADAMTS10	mRNA	-2.91216	0.543702	8.50038e-08	1.70448e-06
evm.model.scaffold10.1052	RIC3	mRNA	-2.90978	0.556381	1.69657e-07	3.19889e-06
evm.model.scaffold352.15355	RBMS3	mRNA	-2.90434	0.588147	7.88838e-07	1.2347e-05
evm.model.scaffold508.18123	NAP1L3	mRNA	-2.90317	0.683206	2.14414e-05	0.000216595
evm.model.scaffold148.10359	PGLYRP3	mRNA	-2.90251	0.347361	6.49433e-17	8.74194e-15
evm.model.scaffold840.21268	Scarf2	mRNA	-2.90132	0.677353	1.84129e-05	0.000190021
evm.model.scaffold27.2658	--	mRNA	-2.89919	0.59681	1.1869e-06	1.78035e-05
evm.model.scaffold43.3910	SVIL	mRNA	-2.89884	0.370759	5.33861e-15	5.19759e-13
evm.model.scaffold333.14978	SLC8A1	mRNA	-2.89763	0.415536	3.09697e-12	1.82981e-10
evm.model.scaffold290.14174	RIMS3	mRNA	-2.89438	0.708996	4.45787e-05	0.000405773
evm.model.scaffold120.9152	C3	mRNA	-2.89049	0.765874	0.000160583	0.00120496
evm.model.scaffold6.819	Rgs11	mRNA	-2.87991	0.442056	7.27782e-11	3.16463e-09
evm.model.scaffold778.20743	OPRK1	mRNA	-2.87353	1.12677	0.0107648	0.0382024
evm.model.scaffold82.7109	TC2N	mRNA	-2.86864	0.379142	3.8453e-14	3.10028e-12
evm.model.scaffold689.20074	Kcnn2	mRNA	-2.85875	0.594216	1.50202e-06	2.17709e-05
evm.model.scaffold811.21042	GRIA2	mRNA	-2.8443	0.732691	0.000103602	0.00083557
evm.model.scaffold6.795	Metrn	mRNA	-2.8374	0.62277	5.21146e-06	6.51643e-05
evm.model.scaffold252.13298	CD109	mRNA	-2.82812	0.19477	9.00443e-48	2.78777e-44
evm.model.scaffold321.14720	CD3G	mRNA	-2.80636	0.774968	0.000293177	0.00200556
evm.model.scaffold248.13157	QPRT	mRNA	-2.80386	1.09311	0.0103168	0.0369087
evm.model.scaffold571.18873	MMP11	mRNA	-2.7961	0.452804	6.61284e-10	2.28497e-08
evm.model.scaffold76.6728	SACS	mRNA	-2.78751	0.474618	4.27555e-09	1.22793e-07
evm.model.scaffold39.3604	PIK3C2G	mRNA	-2.77682	0.394149	1.85304e-12	1.12933e-10
evm.model.scaffold1003.22129	FN3K	mRNA	-2.77633	0.348944	1.77119e-15	1.90403e-13
evm.model.scaffold71.6458	SLC29A4	mRNA	-2.77542	0.817587	0.00068718	0.00406168
evm.model.scaffold229.12540	Cnih3	mRNA	-2.76823	0.650767	2.10169e-05	0.000213059
evm.model.scaffold688.20066	DZIP1L	mRNA	-2.76418	0.601601	4.33338e-06	5.54386e-05
evm.model.scaffold18.1817	CUX2	mRNA	-2.75044	0.982133	0.0051028	0.0210643
evm.model.scaffold248.13205	TGFB1I1	mRNA	-2.75018	0.477585	8.48534e-09	2.21133e-07
evm.model.scaffold840.21238	RTN4R	mRNA	-2.74263	0.500377	4.22628e-08	9.16285e-07
evm.model.scaffold78.6902	Hoxc4	mRNA	-2.74046	0.618103	9.26432e-06	0.000106152
evm.model.scaffold1229.23004	CRISPLD1	mRNA	-2.72463	0.245287	1.14799e-28	6.83493e-26
evm.model.scaffold120.9059	TLE2	mRNA	-2.7226	0.292713	1.38801e-20	3.46554e-18
evm.model.scaffold466.17565	RORB	mRNA	-2.72119	0.849917	0.00136613	0.00721025
evm.model.scaffold52.4698	DPYD	mRNA	-2.71986	0.346937	4.51772e-15	4.48297e-13
evm.model.scaffold538.18475	JPH1	mRNA	-2.71746	1.02357	0.00793386	0.029949
evm.model.scaffold617.19449	SERPINB2	mRNA	-2.71698	0.411172	3.89828e-11	1.82865e-09
evm.model.scaffold85.7227	SEMA3D	mRNA	-2.71467	0.380183	9.30402e-13	6.15497e-11
evm.model.scaffold69.6299	Ccdc177	mRNA	-2.71336	0.602128	6.59729e-06	7.99735e-05
evm.model.scaffold313.14534	ADRA1B	mRNA	-2.71296	0.443939	9.89358e-10	3.33666e-08
evm.model.scaffold896.21579	MAOA	mRNA	-2.7036	0.724991	0.000192131	0.00139962
evm.model.scaffold638.19686	Ppp1r14c	mRNA	-2.69898	0.255547	4.49004e-26	2.29089e-23
evm.model.scaffold47.4138	TGFBI	mRNA	-2.69451	0.393826	7.81591e-12	4.29044e-10
evm.model.scaffold450.17285	ADAMTSL3	mRNA	-2.68602	0.341769	3.86729e-15	3.96462e-13
evm.model.scaffold265.13609	PCDHA11	mRNA	-2.68486	0.637007	2.49998e-05	0.000246699
evm.model.scaffold459.17451	PCOLCE2	mRNA	-2.68327	0.543277	7.85018e-07	1.231e-05
evm.model.scaffold444.17216	Pinlyp	mRNA	-2.68146	0.824348	0.00114264	0.00620199
evm.model.scaffold85.7182	FGL2	mRNA	-2.6737	0.531904	4.99081e-07	8.26286e-06
evm.model.scaffold526.18332	CADPS	mRNA	-2.66728	0.57795	3.92947e-06	5.08172e-05
evm.model.scaffold118.8991	MAPK4	mRNA	-2.66374	0.866408	0.0021088	0.0102558
evm.model.scaffold73.6573	TG	mRNA	-2.66028	0.492601	6.64597e-08	1.37724e-06
evm.model.scaffold780.20757	TRIM38	mRNA	-2.65768	0.323837	2.27064e-16	2.83463e-14
evm.model.scaffold130.9537	KLRG2	mRNA	-2.65622	0.290839	6.66535e-20	1.49536e-17
evm.model.scaffold241.12998	HOXA2	mRNA	-2.64591	0.897368	0.00319292	0.0143765
evm.model.scaffold1222.22985	NTRK2	mRNA	-2.63932	1.06874	0.0135273	0.0459409
evm.model.scaffold88.7432	Doc2g	mRNA	-2.63178	1.04603	0.0118704	0.0412838
evm.model.scaffold63.6075	LAMA3	mRNA	-2.63134	0.31483	6.38027e-17	8.66374e-15
evm.model.scaffold668.19893	Ctnnd2	mRNA	-2.63131	0.312577	3.8254e-17	5.38338e-15
evm.model.scaffold183.11321	Igsf21	mRNA	-2.62685	0.594219	9.83946e-06	0.000111914
evm.model.scaffold140.9975	MVB12B	mRNA	-2.62419	0.78955	0.000888455	0.00502495
evm.model.scaffold117.8888	CPAMD8	mRNA	-2.61732	1.06039	0.0135767	0.0460791
evm.model.scaffold989.22040	SLC16A2	mRNA	-2.61732	0.834533	0.00171113	0.00861104
evm.model.scaffold360.15529	Nxph4	mRNA	-2.61601	0.81112	0.00125893	0.00672474
evm.model.scaffold14.1522	LTBP2	mRNA	-2.61276	0.31818	2.18315e-16	2.7701e-14
evm.model.scaffold161.10671	NPFFR2	mRNA	-2.60726	0.811826	0.00131996	0.00701683
evm.model.scaffold160.10630	CHSY3	mRNA	-2.60302	0.566887	4.39468e-06	5.60662e-05
evm.model.scaffold472.17646	ABI3BP	mRNA	-2.60042	0.387818	2.01065e-11	1.02384e-09
evm.model.scaffold184.11356	MACC1	mRNA	-2.59808	0.333509	6.6938e-15	6.35706e-13
evm.model.scaffold414.16778	SFRP1	mRNA	-2.59706	0.274787	3.35119e-21	9.26364e-19
evm.model.scaffold429.16970	S1PR1	mRNA	-2.59356	0.335712	1.11371e-14	9.96542e-13
evm.model.scaffold465.17515	MYLK4	mRNA	-2.59165	0.646171	6.0519e-05	0.000528048
evm.model.scaffold112.8678	KCNH8	mRNA	-2.59124	0.66856	0.000106249	0.000852539
evm.model.scaffold177.11091	TMOD2	mRNA	-2.58744	0.573754	6.49294e-06	7.88938e-05
evm.model.scaffold667.19884	PLSCR4	mRNA	-2.57776	0.754782	0.000637279	0.00381951
evm.model.scaffold465.17518	SERPINB9	mRNA	-2.57684	0.36488	1.63955e-12	1.00715e-10
evm.model.scaffold132.9620	SAMD4A	mRNA	-2.57363	0.306275	4.35128e-17	5.98209e-15
evm.model.scaffold16.1696	CCND3	mRNA	-2.57353	0.405645	2.23447e-10	8.56177e-09
evm.model.scaffold195.11636	GSDME	mRNA	-2.56781	0.676759	0.000148074	0.00112142
evm.model.scaffold18.1790	HRK	mRNA	-2.56342	1.0382	0.0135457	0.045984
evm.model.scaffold204.11834	--	mRNA	-2.56215	0.440222	5.88003e-09	1.59678e-07
evm.model.scaffold450.17280	TM6SF1	mRNA	-2.55694	0.78779	0.00117157	0.00632356
evm.model.scaffold1141.22698	AR	mRNA	-2.55457	0.576028	9.2157e-06	0.000105752
evm.model.scaffold234.12797	RRAS	mRNA	-2.55205	0.374738	9.74447e-12	5.23765e-10
evm.model.scaffold6.676	ADCY9	mRNA	-2.54781	0.272601	9.07741e-21	2.30358e-18
evm.model.scaffold444.17178	AXL	mRNA	-2.53824	0.472684	7.88071e-08	1.59469e-06
evm.model.scaffold1.32	NR4A2	mRNA	-2.53694	0.532353	1.88361e-06	2.65075e-05
evm.model.scaffold77.6782	ACADL	mRNA	-2.52858	0.458996	3.60981e-08	8.05186e-07
evm.model.scaffold564.18750	GSDMD	mRNA	-2.51809	0.325461	1.01799e-14	9.2697e-13
evm.model.scaffold27.2660	CCDC68	mRNA	-2.51354	0.348965	5.8976e-13	3.98667e-11
evm.model.scaffold472.17645	ABI3BP	mRNA	-2.5124	0.360499	3.18651e-12	1.87556e-10
evm.model.scaffold544.18544	MYH11	mRNA	-2.50855	0.463417	6.19271e-08	1.29196e-06
evm.model.scaffold12.1294	SRCIN1	mRNA	-2.5073	0.286708	2.2276e-18	3.87452e-16
evm.model.scaffold234.12714	PNMA8A	mRNA	-2.50451	0.421476	2.81166e-09	8.51752e-08
evm.model.scaffold248.13179	ZNF629	mRNA	-2.5009	0.4656	7.81492e-08	1.58552e-06
evm.model.scaffold34.3195	TOGARAM2	mRNA	-2.49699	0.785571	0.00148005	0.00767328
evm.model.scaffold11.1090	CHN1	mRNA	-2.49334	0.873764	0.00432324	0.0185108
evm.model.scaffold382.16061	RYDEN	mRNA	-2.47539	0.306302	6.39565e-16	7.17425e-14
evm.model.scaffold10.1024	GALNT18	mRNA	-2.46772	0.265818	1.64037e-20	4.03062e-18
evm.model.scaffold25.2586	CBX7	mRNA	-2.46526	0.269492	5.81003e-20	1.34238e-17
evm.model.scaffold408.16694	FLOT2	mRNA	-2.45632	0.363544	1.41274e-11	7.41328e-10
evm.model.scaffold375.15950	TF	mRNA	-2.45342	0.71108	0.000560011	0.00343734
evm.model.scaffold265.13608	PCDHA12	mRNA	-2.45295	0.889815	0.00583882	0.0235076
evm.model.scaffold193.11588	THBS2	mRNA	-2.44977	0.34548	1.33232e-12	8.38385e-11
evm.model.scaffold524.18311	GPA33	mRNA	-2.44886	0.677885	0.000303252	0.00206982
evm.model.scaffold943.21833	SLURP1	mRNA	-2.448	0.873727	0.00508192	0.0209893
evm.model.scaffold18.1886	RFLNA	mRNA	-2.44665	0.903898	0.00679399	0.0264983
evm.model.scaffold20.2014	TP73	mRNA	-2.44552	0.452059	6.31132e-08	1.3114e-06
evm.model.scaffold166.10795	Tgfb2	mRNA	-2.44142	0.272808	3.57927e-19	6.92589e-17
evm.model.scaffold1204.22913	OR52H1	mRNA	-2.43642	0.382365	1.86607e-10	7.27626e-09
evm.model.scaffold234.12856	HAS1	mRNA	-2.43642	0.95487	0.0107239	0.0381009
evm.model.scaffold308.14483	NOV	mRNA	-2.42615	0.692944	0.000463136	0.00293705
evm.model.scaffold265.13610	PCDHA3	mRNA	-2.42344	0.710128	0.000643275	0.00385069
evm.model.scaffold324.14811	SIAE	mRNA	-2.42069	0.441228	4.10532e-08	8.96338e-07
evm.model.scaffold481.17764	SLC10A6	mRNA	-2.41922	0.232499	2.34566e-25	9.81373e-23
evm.model.scaffold75.6637	MTMR9	mRNA	-2.41671	0.740351	0.00109743	0.00598874
evm.model.scaffold50.4591	Fbln2	mRNA	-2.41635	0.470457	2.80404e-07	4.98352e-06
evm.model.scaffold48.4311	KIAA2012	mRNA	-2.41501	0.522098	3.73523e-06	4.86711e-05
evm.model.scaffold10.1051	LMO1	mRNA	-2.41198	0.277201	3.28433e-18	5.52625e-16
evm.model.scaffold931.21776	HS6ST2	mRNA	-2.40654	0.540567	8.51214e-06	9.88899e-05
evm.model.scaffold24.2303	--	mRNA	-2.40271	0.687792	0.000476972	0.00300877
evm.model.scaffold457.17402	CSF1	mRNA	-2.39696	0.758337	0.00157332	0.00804589
evm.model.scaffold233.12647	CTGF	mRNA	-2.3967	0.46231	2.16958e-07	3.98399e-06
evm.model.scaffold128.9452	SGSM1	mRNA	-2.38455	0.75871	0.00167281	0.00845036
evm.model.scaffold574.18975	SMARCA1	mRNA	-2.38395	0.36495	6.47796e-11	2.85695e-09
evm.model.scaffold75.6618	TINAGL1	mRNA	-2.38301	0.928996	0.0103131	0.0369042
evm.model.scaffold33.3159	FAM13C	mRNA	-2.37072	0.477294	6.79982e-07	1.08293e-05
evm.model.scaffold78.6835	FIGNL2	mRNA	-2.36507	0.293224	7.27864e-16	8.106e-14
evm.model.scaffold216.12168	Htra3	mRNA	-2.36477	0.46381	3.42213e-07	5.91895e-06
evm.model.scaffold491.17924	DST	mRNA	-2.35677	0.259574	1.09199e-19	2.31562e-17
evm.model.scaffold41.3757	LAMB2	mRNA	-2.35428	0.296703	2.10803e-15	2.23509e-13
evm.model.scaffold6.779	Cacna1h	mRNA	-2.35231	0.441894	1.01931e-07	2.02035e-06
evm.model.scaffold30.2817	ANGPTL2	mRNA	-2.33903	0.89481	0.00894887	0.0330328
evm.model.scaffold49.4413	RNF213	mRNA	-2.33612	0.3017	9.69624e-15	8.9344e-13
evm.model.scaffold120.9126	NRTN	mRNA	-2.33506	0.35208	3.30723e-11	1.57526e-09
evm.model.scaffold42.3806	LZTS3	mRNA	-2.33158	0.273718	1.62099e-17	2.43621e-15
evm.model.scaffold233.12648	ENPP1	mRNA	-2.32092	0.301943	1.51085e-14	1.29215e-12
evm.model.scaffold88.7384	SHANK2	mRNA	-2.32047	0.596797	0.000100987	0.000816846
evm.model.scaffold543.18529	HMCN1	mRNA	-2.31508	0.326925	1.42736e-12	8.83824e-11
evm.model.scaffold62.5967	NPAS2	mRNA	-2.31455	0.274119	3.07664e-17	4.45106e-15
evm.model.scaffold30.2956	FAM69B	mRNA	-2.30556	0.353335	6.79321e-11	2.97901e-09
evm.model.scaffold79.6968	LGR6	mRNA	-2.30555	0.868872	0.00796624	0.0300554
evm.model.scaffold39.3607	lmo3	mRNA	-2.29505	0.732775	0.00173622	0.00871771
evm.model.scaffold1180.22822	--	mRNA	-2.29274	0.275415	8.45748e-17	1.11899e-14
evm.model.scaffold69.6292	SMOC1	mRNA	-2.28279	0.860697	0.00799557	0.0301587
evm.model.scaffold474.17682	FBXL22	mRNA	-2.28114	0.608338	0.000176978	0.0013052
evm.model.scaffold1352.23355	FIBIN	mRNA	-2.28047	0.652875	0.000477689	0.00301084
evm.model.scaffold78.6900	Hoxc6	mRNA	-2.27661	0.413319	3.62682e-08	8.07815e-07
evm.model.scaffold564.18771	PARP10	mRNA	-2.26344	0.38558	4.35247e-09	1.2431e-07
evm.model.scaffold261.13531	CALCRL	mRNA	-2.25856	0.401688	1.88025e-08	4.53369e-07
evm.model.scaffold24.2315	MYH3	mRNA	-2.24563	0.708253	0.00152097	0.0078312
evm.model.scaffold55.5589	MAT1A	mRNA	-2.24447	0.306461	2.40982e-13	1.70338e-11
evm.model.scaffold406.16614	RNASE4	mRNA	-2.2442	0.275779	4.0302e-16	4.7624e-14
evm.model.scaffold121.9179	TDRD7	mRNA	-2.24285	0.255364	1.59239e-18	2.86631e-16
evm.model.scaffold165.10782	DHRS12	mRNA	-2.24203	0.303631	1.53541e-13	1.11066e-11
evm.model.scaffold895.21575	PRDM5	mRNA	-2.23727	0.232185	5.64928e-22	1.74902e-19
evm.model.scaffold91.7751	NUAK1	mRNA	-2.23151	0.250439	5.0836e-19	9.71533e-17
evm.model.scaffold83.7126	Foxp2	mRNA	-2.23119	0.333372	2.18961e-11	1.10049e-09
evm.model.scaffold117.8847	RASAL3	mRNA	-2.22804	0.721623	0.00201818	0.00988028
evm.model.scaffold201.11760	SGCE	mRNA	-2.22715	0.42219	1.32594e-07	2.5786e-06
evm.model.scaffold235.12871	TMEM88B	mRNA	-2.22556	0.446696	6.28437e-07	1.01335e-05
evm.model.scaffold156.10549	PDGFRA	mRNA	-2.22213	0.82096	0.00679476	0.0264983
evm.model.scaffold5.461	SDC4	mRNA	-2.21652	0.261601	2.39378e-17	3.56305e-15
evm.model.scaffold8.878	PLSCR2	mRNA	-2.21465	0.771606	0.00410231	0.0177102
evm.model.scaffold20.2052	CAMTA1	mRNA	-2.21191	0.295382	6.97732e-14	5.32064e-12
evm.model.scaffold312.14524	FAM47E	mRNA	-2.20953	0.886504	0.012688	0.0436466
evm.model.scaffold248.13181	Ctf1	mRNA	-2.20752	0.616027	0.000339054	0.00226681
evm.model.scaffold354.15388	SAMD9	mRNA	-2.20204	0.359105	8.6773e-10	2.95869e-08
evm.model.scaffold995.22074	--	mRNA	-2.19731	0.442101	6.68971e-07	1.06759e-05
evm.model.scaffold298.14312	COL4A2	mRNA	-2.19598	0.393465	2.38949e-08	5.62147e-07
evm.model.scaffold78.6870	TNS2	mRNA	-2.19019	0.419233	1.74828e-07	3.27644e-06
evm.model.scaffold335.15001	AGMO	mRNA	-2.18794	0.372879	4.41883e-09	1.25735e-07
evm.model.scaffold12.1329	NR1D1	mRNA	-2.18696	0.201625	2.06804e-27	1.18568e-24
evm.model.scaffold406.16625	NDRG2	mRNA	-2.18679	0.248438	1.34241e-18	2.44476e-16
evm.model.scaffold7660.24771	--	mRNA	-2.18197	0.514371	2.21515e-05	0.0002231
evm.model.scaffold617.19445	SERPINB3	mRNA	-2.18191	0.714914	0.00227327	0.0108925
evm.model.scaffold27.2662	Tcf4	mRNA	-2.17421	0.33885	1.39496e-10	5.57986e-09
evm.model.scaffold243.13040	KCNMB1	mRNA	-2.16818	0.884786	0.0142653	0.0478499
evm.model.scaffold24.2336	ARHGEF15	mRNA	-2.1664	0.805489	0.00715481	0.0276269
evm.model.scaffold66.6167	ENOX1	mRNA	-2.15949	0.453112	1.88011e-06	2.64862e-05
evm.model.scaffold519.18258	CLDN8	mRNA	-2.1577	0.263095	2.37951e-16	2.94679e-14
evm.model.scaffold39.3589	GEM	mRNA	-2.15389	0.415208	2.13136e-07	3.9278e-06
evm.model.scaffold234.12791	RRAS	mRNA	-2.14494	0.640503	0.000811489	0.00466463
evm.model.scaffold1115.22607	MXRA5	mRNA	-2.14443	0.325646	4.54464e-11	2.09378e-09
evm.model.scaffold341.15082	PCDH20	mRNA	-2.14178	0.47736	7.23315e-06	8.64699e-05
evm.model.scaffold1165.22769	ST3GAL6	mRNA	-2.13982	0.326804	5.84212e-11	2.62133e-09
evm.model.scaffold1127.22648	POF1B	mRNA	-2.1365	0.247976	6.94811e-18	1.09752e-15
evm.model.scaffold613.19405	CLMN	mRNA	-2.13441	0.558641	0.000133067	0.00102737
evm.model.scaffold95.7925	CCDC9B	mRNA	-2.13358	0.348659	9.39268e-10	3.18159e-08
evm.model.scaffold30.2989	COL5A1	mRNA	-2.12955	0.71746	0.00299566	0.0136591
evm.model.scaffold427.16964	PRSS23	mRNA	-2.12945	0.350967	1.30016e-09	4.29136e-08
evm.model.scaffold93.7815	MSH6	mRNA	-2.12806	0.256327	1.02247e-16	1.34134e-14
evm.model.scaffold41.3754	KLHDC8B	mRNA	-2.12748	0.377655	1.76706e-08	4.27408e-07
evm.model.scaffold294.14213	ADAMTSL1	mRNA	-2.12703	0.41087	2.25614e-07	4.11367e-06
evm.model.scaffold235.12868	TMEM240	mRNA	-2.12491	0.574932	0.000219077	0.00156498
evm.model.scaffold78.6910	ITGA5	mRNA	-2.11927	0.631175	0.000786045	0.00454029
evm.model.scaffold80.7003	CRYAB	mRNA	-2.11812	0.286263	1.37009e-13	1.00043e-11
evm.model.scaffold31.3079	EPHA7	mRNA	-2.11674	0.274297	1.19133e-14	1.05796e-12
evm.model.scaffold20.2039	ESPN	mRNA	-2.1161	0.66147	0.00137862	0.00726832
evm.model.scaffold484.17805	NPNT	mRNA	-2.11381	0.43946	1.50927e-06	2.18554e-05
evm.model.scaffold21.2089	TSHZ2	mRNA	-2.11294	0.704016	0.00268859	0.0124871
evm.model.scaffold113.8723	--	mRNA	-2.11004	0.522933	5.4601e-05	0.000482433
evm.model.scaffold123.9227	STARD13	mRNA	-2.10982	0.340342	5.6776e-10	1.99748e-08
evm.model.scaffold71.6509	PDGFA	mRNA	-2.10962	0.372372	1.46716e-08	3.62807e-07
evm.model.scaffold384.16135	SLC28A2	mRNA	-2.10838	0.738621	0.0043108	0.01848
evm.model.scaffold888.21532	GABRE	mRNA	-2.10278	0.558363	0.000165898	0.00123704
evm.model.scaffold41.3773	COL7A1	mRNA	-2.10024	0.383638	4.3864e-08	9.47021e-07
evm.model.scaffold1827.24084	SERPINB6	mRNA	-2.09821	0.295241	1.18791e-12	7.5987e-11
evm.model.scaffold62.6004	LOXL3	mRNA	-2.09589	0.523024	6.14304e-05	0.000532741
evm.model.scaffold321.14713	PHLDB1	mRNA	-2.09533	0.348755	1.87784e-09	6.006e-08
evm.model.scaffold17.1782	CXCR4	mRNA	-2.09407	0.266063	3.53029e-15	3.66771e-13
evm.model.scaffold198.11707	ISM1	mRNA	-2.09308	0.376507	2.71015e-08	6.29927e-07
evm.model.scaffold41.3742	BSN	mRNA	-2.09229	0.683467	0.00220385	0.0106445
evm.model.scaffold354.15371	FZD1	mRNA	-2.09181	0.270017	9.41281e-15	8.72517e-13
evm.model.scaffold61.5946	SNX31	mRNA	-2.08769	0.621522	0.000782239	0.00452337
evm.model.scaffold811.21044	PDGFC	mRNA	-2.087	0.442241	2.36836e-06	3.25886e-05
evm.model.scaffold130.9559	LCHN	mRNA	-2.08698	0.356479	4.78652e-09	1.33265e-07
evm.model.scaffold33.3175	--	mRNA	-2.08404	0.589199	0.000404588	0.00263364
evm.model.scaffold275.13884	Fzd9	mRNA	-2.08223	0.800857	0.00932242	0.0341
evm.model.scaffold1122.22625	MYH11	mRNA	-2.08092	0.347585	2.14027e-09	6.74774e-08
evm.model.scaffold338.15039	Crim1	mRNA	-2.07915	0.276698	5.7279e-14	4.50091e-12
evm.model.scaffold25.2498	CRACR2A	mRNA	-2.07899	0.220369	3.94374e-21	1.07104e-18
evm.model.scaffold43.3904	MAP3K8	mRNA	-2.0766	0.266689	6.8833e-15	6.49716e-13
evm.model.scaffold35.3322	OVOL2	mRNA	-2.07496	0.254362	3.41988e-16	4.10386e-14
evm.model.scaffold783.20810	P3H2	mRNA	-2.07056	0.345348	2.02758e-09	6.41861e-08
evm.model.scaffold80.7026	USP28	mRNA	-2.06714	0.220112	5.92491e-21	1.52863e-18
evm.model.scaffold12.1175	SHMT1	mRNA	-2.06596	0.279608	1.48187e-13	1.07696e-11
evm.model.scaffold255.13354	LOXL2	mRNA	-2.06576	0.443563	3.2053e-06	4.26725e-05
evm.model.scaffold831.21172	FAM107A	mRNA	-2.06507	0.553154	0.000189018	0.00137953
evm.model.scaffold430.17019	DLG2	mRNA	-2.06505	0.491877	2.68934e-05	0.000262987
evm.model.scaffold275.13889	VPS37D	mRNA	-2.06359	0.534532	0.000113131	0.00089855
evm.model.scaffold604.19270	SLC43A1	mRNA	-2.06255	0.638226	0.00123059	0.00659612
evm.model.scaffold80.7004	HSPB2	mRNA	-2.06236	0.375404	3.9354e-08	8.6534e-07
evm.model.scaffold604.19267	UBE2L6	mRNA	-2.06205	0.459088	7.06818e-06	8.50159e-05
evm.model.scaffold23.2267	CD59	mRNA	-2.05928	0.256314	9.41828e-16	1.04139e-13
evm.model.scaffold371.15891	--	mRNA	-2.05629	0.648126	0.0015104	0.00778788
evm.model.scaffold57.5685	PCNX2	mRNA	-2.05498	0.593928	0.000540194	0.00333421
evm.model.scaffold28.2757	ITGA2	mRNA	-2.05493	0.323885	2.22981e-10	8.56177e-09
evm.model.scaffold67.6219	Camk1	mRNA	-2.05327	0.527755	0.000100007	0.000810527
evm.model.scaffold234.12776	KCNA7	mRNA	-2.04818	0.434219	2.39439e-06	3.28883e-05
evm.model.scaffold362.15580	ALPK1	mRNA	-2.04813	0.154212	2.97354e-40	3.5408e-37
evm.model.scaffold695.20137	SERPINH1	mRNA	-2.04475	0.406318	4.84418e-07	8.03729e-06
evm.model.scaffold457.17406	GSTM1	mRNA	-2.04467	0.372452	4.02479e-08	8.82489e-07
evm.model.scaffold1608.23837	CCDC7	mRNA	-2.04041	0.497357	4.0869e-05	0.000376131
evm.model.scaffold85.7212	CACNA2D1	mRNA	-2.03979	0.319924	1.81946e-10	7.13043e-09
evm.model.scaffold368.15816	Cdc42ep5	mRNA	-2.03748	0.715528	0.00440607	0.0187688
evm.model.scaffold12.1145	FBXW10	mRNA	-2.034	0.40921	6.67599e-07	1.0665e-05
evm.model.scaffold70.6359	B3GNT9	mRNA	-2.02799	0.410333	7.72001e-07	1.21449e-05
evm.model.scaffold248.13116	CD19	mRNA	-2.02742	0.815921	0.0129613	0.0444093
evm.model.scaffold755.20553	Atp2b3	mRNA	-2.02738	0.630708	0.00130698	0.00696215
evm.model.scaffold260.13495	NTRK2	mRNA	-2.01563	0.375854	8.19367e-08	1.65154e-06
evm.model.scaffold466.17562	INSR	mRNA	-2.0137	0.224028	2.50312e-19	4.96774e-17
evm.model.scaffold638.19692	LRP11	mRNA	-2.01237	0.517352	0.000100346	0.000812848
evm.model.scaffold237.12943	--	mRNA	-2.01212	0.801957	0.0121069	0.0419553
evm.model.scaffold390.16245	PIK3IP1	mRNA	-2.01055	0.244201	1.82289e-16	2.35153e-14
evm.model.scaffold792.20877	Clec2d11	mRNA	-2.00866	0.676675	0.00299331	0.0136525
evm.model.scaffold465.17517	SERPINB1	mRNA	-2.00511	0.222056	1.72031e-19	3.55071e-17
evm.model.scaffold204.11837	--	mRNA	-2.00463	0.408728	9.36311e-07	1.43933e-05
evm.model.scaffold30.2966	ADAMTS13	mRNA	-2.00304	0.411396	1.12227e-06	1.70098e-05
evm.model.scaffold139.9923	SLC19A1	mRNA	2.00556	0.303567	3.93114e-11	1.83849e-09
evm.model.scaffold176.11048	MGARP	mRNA	2.01105	0.372532	6.72671e-08	1.38839e-06
evm.model.scaffold486.17828	CSMD2	mRNA	2.0312	0.792876	0.0104129	0.0371923
evm.model.scaffold215.12078	EFCAB5	mRNA	2.03147	0.688649	0.00317845	0.014328
evm.model.scaffold1018.22191	CD5	mRNA	2.03645	0.673971	0.00251465	0.0117924
evm.model.scaffold227.12504	MLANA	mRNA	2.04191	0.485419	2.59362e-05	0.000254592
evm.model.scaffold49.4397	TSPAN10	mRNA	2.0663	0.642981	0.0013107	0.00697716
evm.model.scaffold586.19075	PLXNC1	mRNA	2.11226	0.42264	5.79962e-07	9.41071e-06
evm.model.scaffold6.767	TMEM204	mRNA	2.14348	0.738999	0.0037255	0.0163512
evm.model.scaffold719.20304	CNTNAP3	mRNA	2.14452	0.533666	5.85775e-05	0.000512885
evm.model.scaffold1072.22396	KCNJ8	mRNA	2.1547	0.785061	0.0060581	0.0242386
evm.model.scaffold578.19012	Tcl1a	mRNA	2.1628	0.431717	5.44983e-07	8.91791e-06
evm.model.scaffold48.4287	GPR1	mRNA	2.20228	0.818196	0.00711031	0.0275169
evm.model.scaffold49.4374	NOTUM	mRNA	2.20442	0.261281	3.25688e-17	4.6682e-15
evm.model.scaffold50.4573	TRH	mRNA	2.20462	0.876312	0.0118763	0.0412858
evm.model.scaffold468.17590	MYOM2	mRNA	2.20655	0.748414	0.00319518	0.0143783
evm.model.scaffold698.20173	APBA2	mRNA	2.20749	0.692553	0.00143523	0.00749067
evm.model.scaffold457.17397	SLC6A17	mRNA	2.21127	0.43307	3.29e-07	5.71595e-06
evm.model.scaffold514.18196	ADCY2	mRNA	2.21261	0.605881	0.000260325	0.00180791
evm.model.scaffold1097.22516	GJB1	mRNA	2.22725	0.711976	0.00175843	0.00881926
evm.model.scaffold183.11314	ACTL8	mRNA	2.22824	0.603988	0.000224944	0.00159658
evm.model.scaffold57.5666	NID1	mRNA	2.26885	0.633072	0.000338534	0.00226525
evm.model.scaffold1015.22174	ATP6V0D2	mRNA	2.27577	0.536762	2.23712e-05	0.000224292
evm.model.scaffold546.18581	TERT	mRNA	2.2762	0.309011	1.7573e-13	1.25359e-11
evm.model.scaffold274.13837	--	mRNA	2.31405	0.700399	0.00095348	0.00532463
evm.model.scaffold704.20212	Oca2	mRNA	2.33585	0.305963	2.26858e-14	1.88804e-12
evm.model.scaffold108.8545	EDNRB	mRNA	2.34009	0.421989	2.93305e-08	6.72646e-07
evm.model.scaffold127.9382	ADGRA2	mRNA	2.34769	0.366525	1.50123e-10	5.95873e-09
evm.model.scaffold34.3233	CENPA	mRNA	2.36043	0.67387	0.00046041	0.00292576
evm.model.scaffold217.12252	Unc5c	mRNA	2.36435	0.632485	0.000185344	0.00135784
evm.model.scaffold426.16937	TRPM1	mRNA	2.403	0.37884	2.25287e-10	8.61096e-09
evm.model.scaffold292.14185	DCT	mRNA	2.47709	0.37895	6.28829e-11	2.78122e-09
evm.model.scaffold465.17498	IRF4	mRNA	2.48114	0.841067	0.00317786	0.014328
evm.model.scaffold30.3014	PTGDS	mRNA	2.48932	0.416552	2.28656e-09	7.1507e-08
evm.model.scaffold12.1152	TRPV2	mRNA	2.50046	0.454711	3.8195e-08	8.4238e-07
evm.model.scaffold602.19247	PAX3	mRNA	2.55575	0.712394	0.00033379	0.00224265
evm.model.scaffold537.18454	COPB2	mRNA	2.576	0.810167	0.00147482	0.00765342
evm.model.scaffold142.10011	COL11A2	mRNA	2.57764	0.321557	1.09121e-15	1.18958e-13
evm.model.scaffold197.11698	DIRAS3	mRNA	2.58077	0.641595	5.76021e-05	0.000506349
evm.model.scaffold1088.22456	SLC45A2	mRNA	2.5931	0.39968	8.70266e-11	3.67077e-09
evm.model.scaffold351.15266	RASGRP4	mRNA	2.71338	0.724006	0.000178435	0.00131469
evm.model.scaffold45.4062	MC1R	mRNA	2.80297	0.409908	8.02874e-12	4.37623e-10
evm.model.scaffold360.15477	PMEL	mRNA	2.81288	0.35759	3.65506e-15	3.77202e-13
evm.model.scaffold934.21786	SLC24A5	mRNA	2.81653	0.408511	5.40089e-12	3.06248e-10
evm.model.scaffold641.19727	SLC18A1	mRNA	2.86626	0.883206	0.0011733	0.00632695
evm.model.scaffold280.14000	RGR	mRNA	2.91301	0.496474	4.42673e-09	1.25735e-07
evm.model.scaffold54.5545	CAMK2B	mRNA	2.94885	0.753777	9.14991e-05	0.000751409
evm.model.scaffold170.10903	CHRNA10	mRNA	3.10902	1.08924	0.00431329	0.0184855
evm.model.scaffold593.19156	HPSE2	mRNA	3.17436	0.680756	3.11638e-06	4.16594e-05
evm.model.scaffold25.2562	SOX10	mRNA	3.22722	0.614816	1.52861e-07	2.92135e-06
evm.model.scaffold141.9979	ST8SIA1	mRNA	3.2669	0.833215	8.82431e-05	0.000729313
evm.model.scaffold804.20949	GPC2	mRNA	3.26797	1.33236	0.0141765	0.0476138
evm.model.scaffold191.11538	HPSE2	mRNA	3.29331	0.597707	3.59018e-08	8.01963e-07
evm.model.scaffold1727.23994	JARID2	mRNA	3.30459	0.901275	0.000245826	0.00172345
evm.model.scaffold708.20241	TYR	mRNA	3.35512	0.419779	1.32141e-15	1.43045e-13
evm.model.scaffold1358.23380	GPR143	mRNA	3.38309	0.589942	9.77345e-09	2.51736e-07
evm.model.scaffold593.19157	CNNM1	mRNA	3.3968	0.794993	1.93086e-05	0.000198208
evm.model.scaffold5.518	Slc32a1	mRNA	3.47845	0.720459	1.37841e-06	2.03988e-05
evm.model.scaffold980.22013	IGSF11	mRNA	3.5319	0.951583	0.000205947	0.00148075
evm.model.scaffold694.20130	CYP4A11	mRNA	3.64684	1.05844	0.000570058	0.00348854
evm.model.scaffold50.4555	PPARG	mRNA	3.75655	1.30815	0.00408334	0.0176564
evm.model.scaffold88.7639	ZFP64	mRNA	3.86412	1.39883	0.00573808	0.023186
evm.model.scaffold130.9544	RPL10	mRNA	3.88307	1.57785	0.0138555	0.046861
evm.model.scaffold414.16785	AP3M2	mRNA	3.94311	1.47239	0.00740569	0.0283973
evm.model.scaffold2906.24419	--	mRNA	3.96812	1.56245	0.0110954	0.039196
evm.model.scaffold1072.22395	ABCC9	mRNA	3.99275	1.01486	8.3441e-05	0.000696002
evm.model.scaffold12.1248	--	mRNA	4.07471	1.4644	0.00539394	0.0220138
evm.model.scaffold102.8311	--	mRNA	4.17979	1.54167	0.00670372	0.0262452
evm.model.scaffold755.20573	OPN1LW	mRNA	4.22353	1.4288	0.00311655	0.0140983
evm.model.scaffold666.19878	CLIC6	mRNA	4.2251	0.651526	8.87701e-11	3.72402e-09
evm.model.scaffold1994.24173	Olfr1009	mRNA	4.32755	1.66332	0.00927465	0.0339573
evm.model.scaffold11.1075	HOXD3	mRNA	4.43477	1.43199	0.00195535	0.00962707
evm.model.scaffold138.9856	LINGO2	mRNA	4.47804	1.63222	0.00607835	0.0242883
evm.model.scaffold86.7243	STPG1	mRNA	4.48254	1.61592	0.00553743	0.022534
evm.model.scaffold34.3290	KCNS3	mRNA	4.61608	1.17552	8.6068e-05	0.000714387
evm.model.scaffold1579.23795	PTGDR	mRNA	4.62157	1.72412	0.00735028	0.0282479
evm.model.scaffold364.15658	NCF4	mRNA	4.64701	1.3218	0.000438667	0.00281883
evm.model.scaffold593.19155	--	mRNA	4.68792	1.3951	0.000778618	0.00450748
evm.model.scaffold593.19162	Cyp2c23	mRNA	4.6939	1.58619	0.00308408	0.0139882
evm.model.scaffold135.9750	SCML4	mRNA	4.76055	1.86474	0.0106822	0.0379702
evm.model.scaffold5231.24653	ABCC4	mRNA	4.96299	1.72043	0.00391732	0.0170577
evm.model.scaffold403.16550	TRIM15	mRNA	4.96854	1.51926	0.00107406	0.00587922
evm.model.scaffold148.10294	TRIM46	mRNA	5.03333	1.43457	0.000450473	0.00287441
evm.model.scaffold1706.23981	Fads2p1	mRNA	5.24421	1.66162	0.00159902	0.00814236
evm.model.scaffold693.20101	IL36A	mRNA	5.27918	1.38268	0.000134503	0.0010369
evm.model.scaffold195.11633	NPY	mRNA	5.7609	1.44338	6.57249e-05	0.000563356
evm.model.scaffold191.11537	Hpse2	mRNA	5.78601	1.36641	2.29088e-05	0.00022894
evm.model.scaffold290.14172	KCNQ4	mRNA	5.86536	1.36289	1.68038e-05	0.000176115
evm.model.scaffold141.9977	ABCC9	mRNA	6.15925	1.3734	7.30285e-06	8.71613e-05
evm.model.scaffold29.2803	G0S2	mRNA	9.51608	2.81505	0.000723729	0.0042469
