# Supplementary material for: Identification of Potential miRNA–mRNA Regulatory Network Associated with Growth and Development of Hair Follicles in Forest Musk Deer
Source: Animals (Basel). 2023 Dec 15;13(24):3869. doi: 10.3390/ani13243869 (PMC10740511; doi:10.3390/ani13243869)
Supplement: Supplementary file 1 [file animals-13-03869-s001.zip › Supplementary Table S5.xlsx]

## Sheet: Sheet1
Supplementary Table S5 GO enrichment of differentially expressed genes of HFs at anagen stage vs catagen stage (Padj<0.05) at anagen stage and catagen stage in the FMD
Type	Term	GO_accession	generatio	DEGs_num	All_num	P_value	adjust p-value	Count	EnrichmentScore	Genes Of Selected Set In GO term
Biological process	blood vessel development	GO:0001568	0.242938	129	531	0	0	129	2.27049	evm.model.scaffold30.2966,evm.model.scaffold233.12647,evm.model.scaffold306.14449,evm.model.scaffold17.1782,evm.model.scaffold390.16245,evm.model.scaffold255.13354,evm.model.scaffold320.14682,evm.model.scaffold564.18771,evm.model.scaffold35.3322,evm.model.scaffold117.8847,evm.model.scaffold11.1075,evm.model.scaffold257.13419,evm.model.scaffold688.20066,evm.model.scaffold142.10011,evm.model.scaffo…
Biological process	vasculature development	GO:0001944	0.248588	132	531	0	0	132	2.22711	evm.model.scaffold30.2966,evm.model.scaffold233.12647,evm.model.scaffold306.14449,evm.model.scaffold17.1782,evm.model.scaffold390.16245,evm.model.scaffold255.13354,evm.model.scaffold320.14682,evm.model.scaffold564.18771,evm.model.scaffold35.3322,evm.model.scaffold117.8847,evm.model.scaffold11.1075,evm.model.scaffold257.13419,evm.model.scaffold688.20066,evm.model.scaffold142.10011,evm.model.scaffo…
Biological process	positive regulation of multicellular organismal process	GO:0051240	0.335217	178	531	0	0	178	1.79962	evm.model.scaffold233.12647,evm.model.scaffold77.6782,evm.model.scaffold298.14290,evm.model.scaffold120.9126,evm.model.scaffold17.1782,evm.model.scaffold390.16245,evm.model.scaffold255.13354,evm.model.scaffold69.6333,evm.model.scaffold465.17498,evm.model.scaffold516.18216,evm.model.scaffold69.6332,evm.model.scaffold564.18771,evm.model.scaffold375.15950,evm.model.scaffold778.20743,evm.model.scaffo…
Biological process	regulation of signaling	GO:0023051	0.542373	288	531	0	0	288	1.4866	evm.model.scaffold30.2966,evm.model.scaffold233.12647,evm.model.scaffold66.6167,evm.model.scaffold77.6782,evm.model.scaffold469.17610,evm.model.scaffold117.8835,evm.model.scaffold298.14290,evm.model.scaffold201.11761,evm.model.scaffold306.14449,evm.model.scaffold17.1782,evm.model.scaffold390.16245,evm.model.scaffold233.12648,evm.model.scaffold320.14682,evm.model.scaffold69.6333,evm.model.scaffold…
Biological process	anatomical structure formation involved in morphogenesis	GO:0048646	0.335217	178	531	0	0	178	1.77951	evm.model.scaffold30.2966,evm.model.scaffold233.12647,evm.model.scaffold77.6782,evm.model.scaffold306.14449,evm.model.scaffold120.9126,evm.model.scaffold17.1782,evm.model.scaffold926.21746,evm.model.scaffold390.16245,evm.model.scaffold255.13354,evm.model.scaffold320.14682,evm.model.scaffold564.18774,evm.model.scaffold69.6332,evm.model.scaffold375.15952,evm.model.scaffold810.21038,evm.model.scaffo…
Biological process	blood vessel morphogenesis	GO:0048514	0.210923	112	531	1.11022e-16	1.63203e-13	112	2.2597	evm.model.scaffold30.2966,evm.model.scaffold233.12647,evm.model.scaffold306.14449,evm.model.scaffold17.1782,evm.model.scaffold390.16245,evm.model.scaffold255.13354,evm.model.scaffold320.14682,evm.model.scaffold564.18771,evm.model.scaffold35.3322,evm.model.scaffold117.8847,evm.model.scaffold11.1075,evm.model.scaffold257.13419,evm.model.scaffold429.16970,evm.model.scaffold63.6075,evm.model.scaffold…
Biological process	regulation of multicellular organismal development	GO:2000026	0.33145	176	531	2.22045e-16	2.79776e-13	176	1.79025	evm.model.scaffold1727.23994,evm.model.scaffold30.2966,evm.model.scaffold233.12647,evm.model.scaffold469.17610,evm.model.scaffold298.14290,evm.model.scaffold120.9126,evm.model.scaffold17.1782,evm.model.scaffold233.12648,evm.model.scaffold255.13354,evm.model.scaffold320.14682,evm.model.scaffold465.17498,evm.model.scaffold516.18216,evm.model.scaffold564.18774,evm.model.scaffold69.6332,evm.model.sca…
Biological process	positive regulation of developmental process	GO:0051094	0.327684	174	531	3.33067e-16	3.67206e-13	174	1.88602	evm.model.scaffold30.2966,evm.model.scaffold233.12647,evm.model.scaffold469.17610,evm.model.scaffold298.14290,evm.model.scaffold120.9126,evm.model.scaffold17.1782,evm.model.scaffold255.13354,evm.model.scaffold69.6333,evm.model.scaffold516.18216,evm.model.scaffold69.6332,evm.model.scaffold375.15950,evm.model.scaffold778.20743,evm.model.scaffold810.21038,evm.model.scaffold35.3322,evm.model.scaffold…
Biological process	regulation of response to stimulus	GO:0048583	0.613936	326	531	3.33067e-16	3.67206e-13	326	1.46954	evm.model.scaffold1727.23994,evm.model.scaffold30.2966,evm.model.scaffold233.12647,evm.model.scaffold66.6167,evm.model.scaffold77.6782,evm.model.scaffold469.17610,evm.model.scaffold298.14290,evm.model.scaffold201.11761,evm.model.scaffold201.11760,evm.model.scaffold306.14449,evm.model.scaffold120.9126,evm.model.scaffold17.1782,evm.model.scaffold390.16245,evm.model.scaffold233.12648,evm.model.scaff…
Biological process	extracellular matrix organization	GO:0030198	0.129944	69	531	4.44089e-16	3.91687e-13	69	2.95322	evm.model.scaffold30.2966,evm.model.scaffold233.12647,evm.model.scaffold390.16245,evm.model.scaffold255.13354,evm.model.scaffold564.18774,evm.model.scaffold1229.23004,evm.model.scaffold142.10011,evm.model.scaffold30.2989,evm.model.scaffold676.19971,evm.model.scaffold63.6075,evm.model.scaffold62.6004,evm.model.scaffold450.17285,evm.model.scaffold121.9181,evm.model.scaffold422.16882,evm.model.scaff…
Biological process	angiogenesis	GO:0001525	0.188324	100	531	5.55112e-16	4.45099e-13	100	2.35429	evm.model.scaffold30.2966,evm.model.scaffold233.12647,evm.model.scaffold306.14449,evm.model.scaffold17.1782,evm.model.scaffold390.16245,evm.model.scaffold255.13354,evm.model.scaffold320.14682,evm.model.scaffold35.3322,evm.model.scaffold117.8847,evm.model.scaffold11.1075,evm.model.scaffold257.13419,evm.model.scaffold429.16970,evm.model.scaffold62.6004,evm.model.scaffold367.15739,evm.model.scaffold…
Biological process	regulation of multicellular organismal process	GO:0051239	0.52919	281	531	5.55112e-16	4.45099e-13	281	1.62111	evm.model.scaffold1727.23994,evm.model.scaffold30.2966,evm.model.scaffold233.12647,evm.model.scaffold77.6782,evm.model.scaffold469.17610,evm.model.scaffold298.14290,evm.model.scaffold201.11760,evm.model.scaffold120.9126,evm.model.scaffold17.1782,evm.model.scaffold926.21746,evm.model.scaffold390.16245,evm.model.scaffold233.12648,evm.model.scaffold255.13354,evm.model.scaffold320.14682,evm.model.sca…
Biological process	system development	GO:0048731	0.717514	381	531	5.55112e-16	4.45099e-13	381	1.31381	evm.model.scaffold1727.23994,evm.model.scaffold30.2966,evm.model.scaffold233.12647,evm.model.scaffold77.6782,evm.model.scaffold469.17610,evm.model.scaffold117.8835,evm.model.scaffold298.14290,evm.model.scaffold201.11760,evm.model.scaffold306.14449,evm.model.scaffold120.9126,evm.model.scaffold17.1782,evm.model.scaffold926.21746,evm.model.scaffold390.16245,evm.model.scaffold233.12648,evm.model.scaf…
Biological process	cell junction organization	GO:0034330	0.220339	117	531	7.77156e-16	4.89608e-13	117	2.14684	evm.model.scaffold233.12647,evm.model.scaffold298.14290,evm.model.scaffold926.21746,evm.model.scaffold69.6333,evm.model.scaffold516.18216,evm.model.scaffold69.6332,evm.model.scaffold117.8847,evm.model.scaffold257.13419,evm.model.scaffold63.6075,evm.model.scaffold668.19893,evm.model.scaffold524.18311,evm.model.scaffold450.17285,evm.model.scaffold367.15739,evm.model.scaffold121.9181,evm.model.scaff…
Biological process	regulation of cell communication	GO:0010646	0.54049	287	531	7.77156e-16	4.89608e-13	287	1.48772	evm.model.scaffold30.2966,evm.model.scaffold233.12647,evm.model.scaffold66.6167,evm.model.scaffold77.6782,evm.model.scaffold469.17610,evm.model.scaffold117.8835,evm.model.scaffold298.14290,evm.model.scaffold201.11761,evm.model.scaffold306.14449,evm.model.scaffold17.1782,evm.model.scaffold390.16245,evm.model.scaffold233.12648,evm.model.scaffold320.14682,evm.model.scaffold69.6333,evm.model.scaffold…
Biological process	cell adhesion	GO:0007155	0.306968	163	531	8.88178e-16	4.89608e-13	163	1.83006	evm.model.scaffold30.2966,evm.model.scaffold233.12647,evm.model.scaffold77.6782,evm.model.scaffold201.11760,evm.model.scaffold17.1782,evm.model.scaffold926.21746,evm.model.scaffold255.13354,evm.model.scaffold69.6332,evm.model.scaffold810.21038,evm.model.scaffold117.8847,evm.model.scaffold11.1075,evm.model.scaffold142.10011,evm.model.scaffold30.2989,evm.model.scaffold1018.22191,evm.model.scaffold4…
Biological process	regulation of signal transduction	GO:0009966	0.487759	259	531	1.88738e-15	9.79217e-13	259	1.50318	evm.model.scaffold30.2966,evm.model.scaffold233.12647,evm.model.scaffold66.6167,evm.model.scaffold77.6782,evm.model.scaffold469.17610,evm.model.scaffold298.14290,evm.model.scaffold201.11761,evm.model.scaffold306.14449,evm.model.scaffold17.1782,evm.model.scaffold390.16245,evm.model.scaffold233.12648,evm.model.scaffold320.14682,evm.model.scaffold69.6333,evm.model.scaffold465.17498,evm.model.scaffol…
Biological process	extracellular structure organization	GO:0043062	0.129944	69	531	2.10942e-15	1.03362e-12	69	2.89578	evm.model.scaffold30.2966,evm.model.scaffold233.12647,evm.model.scaffold390.16245,evm.model.scaffold255.13354,evm.model.scaffold564.18774,evm.model.scaffold1229.23004,evm.model.scaffold142.10011,evm.model.scaffold30.2989,evm.model.scaffold676.19971,evm.model.scaffold63.6075,evm.model.scaffold62.6004,evm.model.scaffold450.17285,evm.model.scaffold121.9181,evm.model.scaffold422.16882,evm.model.scaff…
Biological process	regulation of cell differentiation	GO:0045595	0.344633	183	531	1.21014e-14	5.61761e-12	183	1.69206	evm.model.scaffold1727.23994,evm.model.scaffold30.2966,evm.model.scaffold233.12647,evm.model.scaffold298.14290,evm.model.scaffold17.1782,evm.model.scaffold233.12648,evm.model.scaffold255.13354,evm.model.scaffold465.17498,evm.model.scaffold69.6332,evm.model.scaffold564.18771,evm.model.scaffold375.15950,evm.model.scaffold778.20743,evm.model.scaffold35.3322,evm.model.scaffold117.8847,evm.model.scaff…
Biological process	multicellular organism development	GO:0007275	0.762712	405	531	1.24345e-14	5.48361e-12	405	1.25563	evm.model.scaffold1727.23994,evm.model.scaffold30.2966,evm.model.scaffold233.12647,evm.model.scaffold77.6782,evm.model.scaffold469.17610,evm.model.scaffold117.8835,evm.model.scaffold298.14290,evm.model.scaffold201.11760,evm.model.scaffold306.14449,evm.model.scaffold120.9126,evm.model.scaffold17.1782,evm.model.scaffold926.21746,evm.model.scaffold390.16245,evm.model.scaffold233.12648,evm.model.scaf…
Biological process	external encapsulating structure organization	GO:0045229	0.148776	79	531	1.85407e-14	7.7871e-12	79	2.53075	evm.model.scaffold30.2966,evm.model.scaffold233.12647,evm.model.scaffold77.6782,evm.model.scaffold390.16245,evm.model.scaffold255.13354,evm.model.scaffold564.18774,evm.model.scaffold1229.23004,evm.model.scaffold142.10011,evm.model.scaffold30.2989,evm.model.scaffold676.19971,evm.model.scaffold63.6075,evm.model.scaffold62.6004,evm.model.scaffold1204.22913,evm.model.scaffold450.17285,evm.model.scaff…
Biological process	synapse organization	GO:0050808	0.169492	90	531	1.9984e-14	8.01177e-12	90	2.34459	evm.model.scaffold298.14290,evm.model.scaffold926.21746,evm.model.scaffold69.6333,evm.model.scaffold516.18216,evm.model.scaffold69.6332,evm.model.scaffold117.8847,evm.model.scaffold257.13419,evm.model.scaffold63.6075,evm.model.scaffold668.19893,evm.model.scaffold450.17285,evm.model.scaffold367.15739,evm.model.scaffold121.9181,evm.model.scaffold755.20553,evm.model.scaffold422.16882,evm.model.scaff…
Biological process	cell-cell signaling	GO:0007267	0.352166	187	531	5.35127e-14	2.0521e-11	187	1.6528	evm.model.scaffold233.12647,evm.model.scaffold77.6782,evm.model.scaffold117.8835,evm.model.scaffold298.14290,evm.model.scaffold306.14449,evm.model.scaffold120.9126,evm.model.scaffold69.6333,evm.model.scaffold564.18774,evm.model.scaffold69.6332,evm.model.scaffold778.20743,evm.model.scaffold117.8847,evm.model.scaffold257.13419,evm.model.scaffold429.16970,evm.model.scaffold177.11091,evm.model.scaffo…
Biological process	system process	GO:0003008	0.419962	223	531	3.46501e-13	1.27339e-10	223	1.52122	evm.model.scaffold1727.23994,evm.model.scaffold30.2966,evm.model.scaffold233.12647,evm.model.scaffold117.8835,evm.model.scaffold298.14290,evm.model.scaffold201.11760,evm.model.scaffold120.9126,evm.model.scaffold17.1782,evm.model.scaffold926.21746,evm.model.scaffold69.6333,evm.model.scaffold564.18774,evm.model.scaffold69.6332,evm.model.scaffold564.18771,evm.model.scaffold375.15950,evm.model.scaffo…
Biological process	negative regulation of response to stimulus	GO:0048585	0.338983	180	531	5.44897e-13	1.9224e-10	180	1.63668	evm.model.scaffold30.2966,evm.model.scaffold233.12647,evm.model.scaffold469.17610,evm.model.scaffold201.11761,evm.model.scaffold306.14449,evm.model.scaffold390.16245,evm.model.scaffold233.12648,evm.model.scaffold320.14682,evm.model.scaffold465.17498,evm.model.scaffold778.20743,evm.model.scaffold35.3322,evm.model.scaffold117.8847,evm.model.scaffold257.13419,evm.model.scaffold429.16970,evm.model.sc…
Biological process	animal organ development	GO:0048513	0.636535	338	531	8.73968e-13	2.96477e-10	338	1.31138	evm.model.scaffold1727.23994,evm.model.scaffold30.2966,evm.model.scaffold233.12647,evm.model.scaffold77.6782,evm.model.scaffold298.14290,evm.model.scaffold201.11761,evm.model.scaffold201.11760,evm.model.scaffold120.9126,evm.model.scaffold17.1782,evm.model.scaffold926.21746,evm.model.scaffold390.16245,evm.model.scaffold233.12648,evm.model.scaffold255.13354,evm.model.scaffold320.14682,evm.model.sca…
Biological process	cell-substrate adhesion	GO:0031589	0.124294	66	531	6.10167e-12	1.99321e-09	66	2.49832	evm.model.scaffold30.2966,evm.model.scaffold233.12647,evm.model.scaffold201.11760,evm.model.scaffold69.6332,evm.model.scaffold11.1075,evm.model.scaffold63.6075,evm.model.scaffold524.18311,evm.model.scaffold444.17178,evm.model.scaffold426.16937,evm.model.scaffold195.11633,evm.model.scaffold123.9227,evm.model.scaffold422.16882,evm.model.scaffold193.11588,evm.model.scaffold491.17924,evm.model.scaffo…
Biological process	signaling	GO:0023052	0.740113	393	531	7.07079e-12	2.2273e-09	393	1.23091	evm.model.scaffold30.2966,evm.model.scaffold233.12647,evm.model.scaffold66.6167,evm.model.scaffold77.6782,evm.model.scaffold469.17610,evm.model.scaffold117.8835,evm.model.scaffold298.14290,evm.model.scaffold201.11761,evm.model.scaffold306.14449,evm.model.scaffold120.9126,evm.model.scaffold17.1782,evm.model.scaffold926.21746,evm.model.scaffold390.16245,evm.model.scaffold233.12648,evm.model.scaffol…
Biological process	nervous system development	GO:0007399	0.506591	269	531	8.12839e-12	2.47215e-09	269	1.39068	evm.model.scaffold1727.23994,evm.model.scaffold233.12647,evm.model.scaffold77.6782,evm.model.scaffold469.17610,evm.model.scaffold117.8835,evm.model.scaffold298.14290,evm.model.scaffold201.11760,evm.model.scaffold120.9126,evm.model.scaffold17.1782,evm.model.scaffold926.21746,evm.model.scaffold233.12648,evm.model.scaffold320.14682,evm.model.scaffold69.6333,evm.model.scaffold516.18216,evm.model.scaf…
Biological process	anatomical structure development	GO:0048856	0.79661	423	531	9.32299e-12	2.74096e-09	423	1.19719	evm.model.scaffold1727.23994,evm.model.scaffold30.2966,evm.model.scaffold233.12647,evm.model.scaffold77.6782,evm.model.scaffold469.17610,evm.model.scaffold117.8835,evm.model.scaffold298.14290,evm.model.scaffold201.11761,evm.model.scaffold201.11760,evm.model.scaffold306.14449,evm.model.scaffold120.9126,evm.model.scaffold17.1782,evm.model.scaffold926.21746,evm.model.scaffold390.16245,evm.model.scaf…
Biological process	anterograde trans-synaptic signaling	GO:0098916	0.201507	107	531	9.32521e-12	2.65317e-09	107	1.94294	evm.model.scaffold117.8835,evm.model.scaffold298.14290,evm.model.scaffold120.9126,evm.model.scaffold69.6333,evm.model.scaffold69.6332,evm.model.scaffold778.20743,evm.model.scaffold117.8847,evm.model.scaffold257.13419,evm.model.scaffold429.16970,evm.model.scaffold177.11091,evm.model.scaffold63.6075,evm.model.scaffold668.19893,evm.model.scaffold524.18311,evm.model.scaffold387.16190,evm.model.scaffo…
Biological process	chemical synaptic transmission	GO:0007268	0.201507	107	531	9.32521e-12	2.65317e-09	107	1.94294	evm.model.scaffold117.8835,evm.model.scaffold298.14290,evm.model.scaffold120.9126,evm.model.scaffold69.6333,evm.model.scaffold69.6332,evm.model.scaffold778.20743,evm.model.scaffold117.8847,evm.model.scaffold257.13419,evm.model.scaffold429.16970,evm.model.scaffold177.11091,evm.model.scaffold63.6075,evm.model.scaffold668.19893,evm.model.scaffold524.18311,evm.model.scaffold387.16190,evm.model.scaffo…
Biological process	regulation of axonogenesis	GO:0050770	0.0847458	45	531	1.24329e-11	3.32299e-09	45	3.13801	evm.model.scaffold233.12647,evm.model.scaffold298.14290,evm.model.scaffold69.6332,evm.model.scaffold117.8847,evm.model.scaffold11.1090,evm.model.scaffold491.17924,evm.model.scaffold39.3591,evm.model.scaffold57.5666,evm.model.scaffold148.10294,evm.model.scaffold101.8201,evm.model.scaffold50.4590,evm.model.scaffold247.13101,evm.model.scaffold3.276,evm.model.scaffold12.1152,evm.model.scaffold351.153…
Biological process	regulation of cell development	GO:0060284	0.169492	90	531	1.88634e-11	4.89338e-09	90	2.07622	evm.model.scaffold233.12647,evm.model.scaffold298.14290,evm.model.scaffold17.1782,evm.model.scaffold69.6332,evm.model.scaffold564.18771,evm.model.scaffold375.15950,evm.model.scaffold778.20743,evm.model.scaffold117.8847,evm.model.scaffold11.1075,evm.model.scaffold257.13419,evm.model.scaffold429.16970,evm.model.scaffold524.18311,evm.model.scaffold367.15739,evm.model.scaffold121.9181,evm.model.scaff…
Biological process	trans-synaptic signaling	GO:0099537	0.201507	107	531	1.91238e-11	4.8192e-09	107	1.92013	evm.model.scaffold117.8835,evm.model.scaffold298.14290,evm.model.scaffold120.9126,evm.model.scaffold69.6333,evm.model.scaffold69.6332,evm.model.scaffold778.20743,evm.model.scaffold117.8847,evm.model.scaffold257.13419,evm.model.scaffold429.16970,evm.model.scaffold177.11091,evm.model.scaffold63.6075,evm.model.scaffold668.19893,evm.model.scaffold524.18311,evm.model.scaffold387.16190,evm.model.scaffo…
Biological process	regulation of nervous system development	GO:0051960	0.150659	80	531	1.98448e-11	4.86197e-09	80	2.1964	evm.model.scaffold233.12647,evm.model.scaffold469.17610,evm.model.scaffold298.14290,evm.model.scaffold17.1782,evm.model.scaffold516.18216,evm.model.scaffold69.6332,evm.model.scaffold375.15950,evm.model.scaffold778.20743,evm.model.scaffold117.8847,evm.model.scaffold11.1075,evm.model.scaffold257.13419,evm.model.scaffold63.6075,evm.model.scaffold450.17285,evm.model.scaffold367.15739,evm.model.scaffo…
Biological process	developmental growth	GO:0048589	0.222222	118	531	2.03286e-11	4.84591e-09	118	1.84101	evm.model.scaffold1727.23994,evm.model.scaffold233.12647,evm.model.scaffold201.11760,evm.model.scaffold17.1782,evm.model.scaffold926.21746,evm.model.scaffold69.6333,evm.model.scaffold516.18216,evm.model.scaffold564.18774,evm.model.scaffold69.6332,evm.model.scaffold429.16970,evm.model.scaffold63.6075,evm.model.scaffold524.18311,evm.model.scaffold127.9382,evm.model.scaffold193.11588,evm.model.scaff…
Biological process	multicellular organismal process	GO:0032501	0.856874	455	531	2.05989e-11	4.7811e-09	455	1.15955	evm.model.scaffold1727.23994,evm.model.scaffold30.2966,evm.model.scaffold233.12647,evm.model.scaffold77.6782,evm.model.scaffold469.17610,evm.model.scaffold117.8835,evm.model.scaffold298.14290,evm.model.scaffold201.11760,evm.model.scaffold306.14449,evm.model.scaffold120.9126,evm.model.scaffold17.1782,evm.model.scaffold926.21746,evm.model.scaffold390.16245,evm.model.scaffold233.12648,evm.model.scaf…
Biological process	cell communication	GO:0007154	0.743879	395	531	2.41324e-11	5.45763e-09	395	1.22091	evm.model.scaffold30.2966,evm.model.scaffold233.12647,evm.model.scaffold66.6167,evm.model.scaffold77.6782,evm.model.scaffold469.17610,evm.model.scaffold117.8835,evm.model.scaffold298.14290,evm.model.scaffold201.11761,evm.model.scaffold306.14449,evm.model.scaffold120.9126,evm.model.scaffold17.1782,evm.model.scaffold926.21746,evm.model.scaffold390.16245,evm.model.scaffold233.12648,evm.model.scaffol…
Biological process	negative regulation of signaling	GO:0023057	0.290019	154	531	3.05702e-11	6.74073e-09	154	1.65263	evm.model.scaffold30.2966,evm.model.scaffold233.12647,evm.model.scaffold298.14290,evm.model.scaffold201.11761,evm.model.scaffold390.16245,evm.model.scaffold233.12648,evm.model.scaffold320.14682,evm.model.scaffold465.17498,evm.model.scaffold778.20743,evm.model.scaffold35.3322,evm.model.scaffold117.8847,evm.model.scaffold257.13419,evm.model.scaffold429.16970,evm.model.scaffold668.19893,evm.model.sc…
Biological process	negative regulation of cell communication	GO:0010648	0.290019	154	531	3.05702e-11	6.74073e-09	154	1.65263	evm.model.scaffold30.2966,evm.model.scaffold233.12647,evm.model.scaffold298.14290,evm.model.scaffold201.11761,evm.model.scaffold390.16245,evm.model.scaffold233.12648,evm.model.scaffold320.14682,evm.model.scaffold465.17498,evm.model.scaffold778.20743,evm.model.scaffold35.3322,evm.model.scaffold117.8847,evm.model.scaffold257.13419,evm.model.scaffold429.16970,evm.model.scaffold668.19893,evm.model.sc…
Biological process	response to organic substance	GO:0010033	0.53484	284	531	3.85161e-11	8.08838e-09	284	1.35059	evm.model.scaffold1727.23994,evm.model.scaffold30.2966,evm.model.scaffold233.12647,evm.model.scaffold469.17610,evm.model.scaffold117.8835,evm.model.scaffold298.14290,evm.model.scaffold201.11761,evm.model.scaffold306.14449,evm.model.scaffold17.1782,evm.model.scaffold390.16245,evm.model.scaffold233.12648,evm.model.scaffold69.6333,evm.model.scaffold465.17498,evm.model.scaffold564.18774,evm.model.sca…
Biological process	positive regulation of signaling	GO:0023056	0.3258	173	531	4.17824e-11	8.57024e-09	173	1.58048	evm.model.scaffold30.2966,evm.model.scaffold233.12647,evm.model.scaffold66.6167,evm.model.scaffold77.6782,evm.model.scaffold469.17610,evm.model.scaffold117.8835,evm.model.scaffold298.14290,evm.model.scaffold17.1782,evm.model.scaffold390.16245,evm.model.scaffold69.6333,evm.model.scaffold564.18774,evm.model.scaffold69.6332,evm.model.scaffold778.20743,evm.model.scaffold257.13419,evm.model.scaffold17…
Biological process	cell-matrix adhesion	GO:0007160	0.086629	46	531	4.99183e-11	1.00063e-08	46	2.96533	evm.model.scaffold30.2966,evm.model.scaffold233.12647,evm.model.scaffold201.11760,evm.model.scaffold69.6332,evm.model.scaffold11.1075,evm.model.scaffold426.16937,evm.model.scaffold123.9227,evm.model.scaffold422.16882,evm.model.scaffold193.11588,evm.model.scaffold491.17924,evm.model.scaffold39.3591,evm.model.scaffold685.20043,evm.model.scaffold394.16320,evm.model.scaffold57.5666,evm.model.scaffold…
Biological process	negative regulation of cell development	GO:0010721	0.0885122	47	531	5.03484e-11	9.86828e-09	47	2.92195	evm.model.scaffold298.14290,evm.model.scaffold564.18771,evm.model.scaffold117.8847,evm.model.scaffold257.13419,evm.model.scaffold429.16970,evm.model.scaffold367.15739,evm.model.scaffold182.11288,evm.model.scaffold57.5666,evm.model.scaffold148.10294,evm.model.scaffold101.8201,evm.model.scaffold50.4590,evm.model.scaffold50.4591,evm.model.scaffold546.18581,evm.model.scaffold12.1145,evm.model.scaffol…
Biological process	enzyme-linked receptor protein signaling pathway	GO:0007167	0.227872	121	531	5.08714e-11	9.75404e-09	121	1.79687	evm.model.scaffold30.2966,evm.model.scaffold233.12647,evm.model.scaffold77.6782,evm.model.scaffold469.17610,evm.model.scaffold298.14290,evm.model.scaffold201.11761,evm.model.scaffold120.9126,evm.model.scaffold233.12648,evm.model.scaffold69.6333,evm.model.scaffold564.18774,evm.model.scaffold69.6332,evm.model.scaffold564.18771,evm.model.scaffold375.15950,evm.model.scaffold35.3322,evm.model.scaffold…
Biological process	negative regulation of cell differentiation	GO:0045596	0.175141	93	531	6.35215e-11	1.19204e-08	93	1.99955	evm.model.scaffold1727.23994,evm.model.scaffold30.2966,evm.model.scaffold233.12647,evm.model.scaffold298.14290,evm.model.scaffold233.12648,evm.model.scaffold564.18771,evm.model.scaffold35.3322,evm.model.scaffold117.8847,evm.model.scaffold257.13419,evm.model.scaffold142.10011,evm.model.scaffold30.2989,evm.model.scaffold429.16970,evm.model.scaffold62.6004,evm.model.scaffold524.18311,evm.model.scaff…
Biological process	regulation of developmental process	GO:0050793	0.504708	268	531	6.75411e-11	1.24107e-08	268	1.36835	evm.model.scaffold1727.23994,evm.model.scaffold30.2966,evm.model.scaffold233.12647,evm.model.scaffold469.17610,evm.model.scaffold298.14290,evm.model.scaffold120.9126,evm.model.scaffold17.1782,evm.model.scaffold233.12648,evm.model.scaffold255.13354,evm.model.scaffold320.14682,evm.model.scaffold69.6333,evm.model.scaffold465.17498,evm.model.scaffold516.18216,evm.model.scaffold564.18774,evm.model.sca…
Biological process	regulation of neurogenesis	GO:0050767	0.12806	68	531	7.58472e-11	1.36525e-08	68	2.32021	evm.model.scaffold233.12647,evm.model.scaffold298.14290,evm.model.scaffold17.1782,evm.model.scaffold69.6332,evm.model.scaffold375.15950,evm.model.scaffold778.20743,evm.model.scaffold117.8847,evm.model.scaffold11.1075,evm.model.scaffold257.13419,evm.model.scaffold367.15739,evm.model.scaffold121.9181,evm.model.scaffold491.17924,evm.model.scaffold80.7030,evm.model.scaffold508.18123,evm.model.scaffol…
Biological process	cell surface receptor signaling pathway	GO:0007166	0.489642	260	531	8.27297e-11	1.45935e-08	260	1.37854	evm.model.scaffold30.2966,evm.model.scaffold233.12647,evm.model.scaffold77.6782,evm.model.scaffold469.17610,evm.model.scaffold298.14290,evm.model.scaffold201.11761,evm.model.scaffold306.14449,evm.model.scaffold120.9126,evm.model.scaffold17.1782,evm.model.scaffold233.12648,evm.model.scaffold320.14682,evm.model.scaffold69.6333,evm.model.scaffold465.17498,evm.model.scaffold564.18774,evm.model.scaffo…
Biological process	anatomical structure morphogenesis	GO:0009653	0.553672	294	531	9.18784e-11	1.58896e-08	294	1.32757	evm.model.scaffold30.2966,evm.model.scaffold233.12647,evm.model.scaffold77.6782,evm.model.scaffold117.8835,evm.model.scaffold298.14290,evm.model.scaffold306.14449,evm.model.scaffold120.9126,evm.model.scaffold17.1782,evm.model.scaffold926.21746,evm.model.scaffold390.16245,evm.model.scaffold255.13354,evm.model.scaffold320.14682,evm.model.scaffold69.6333,evm.model.scaffold516.18216,evm.model.scaffol…
Biological process	negative regulation of nervous system development	GO:0051961	0.0809793	43	531	9.52822e-11	1.61613e-08	43	3.04485	evm.model.scaffold469.17610,evm.model.scaffold298.14290,evm.model.scaffold117.8847,evm.model.scaffold257.13419,evm.model.scaffold63.6075,evm.model.scaffold450.17285,evm.model.scaffold367.15739,evm.model.scaffold57.5666,evm.model.scaffold148.10294,evm.model.scaffold101.8201,evm.model.scaffold50.4590,evm.model.scaffold546.18581,evm.model.scaffold247.13101,evm.model.scaffold3.276,evm.model.scaffold3…
Biological process	synaptic signaling	GO:0099536	0.201507	107	531	1.10391e-10	1.83708e-08	107	1.86449	evm.model.scaffold117.8835,evm.model.scaffold298.14290,evm.model.scaffold120.9126,evm.model.scaffold69.6333,evm.model.scaffold69.6332,evm.model.scaffold778.20743,evm.model.scaffold117.8847,evm.model.scaffold257.13419,evm.model.scaffold429.16970,evm.model.scaffold177.11091,evm.model.scaffold63.6075,evm.model.scaffold668.19893,evm.model.scaffold524.18311,evm.model.scaffold387.16190,evm.model.scaffo…
Biological process	positive regulation of cell communication	GO:0010647	0.322034	171	531	1.45377e-10	2.37449e-08	171	1.56298	evm.model.scaffold30.2966,evm.model.scaffold233.12647,evm.model.scaffold66.6167,evm.model.scaffold77.6782,evm.model.scaffold469.17610,evm.model.scaffold117.8835,evm.model.scaffold298.14290,evm.model.scaffold17.1782,evm.model.scaffold69.6333,evm.model.scaffold564.18774,evm.model.scaffold69.6332,evm.model.scaffold778.20743,evm.model.scaffold257.13419,evm.model.scaffold177.11091,evm.model.scaffold63…
Biological process	cellular response to organic substance	GO:0071310	0.444444	236	531	1.53256e-10	2.45766e-08	236	1.41145	evm.model.scaffold1727.23994,evm.model.scaffold30.2966,evm.model.scaffold233.12647,evm.model.scaffold469.17610,evm.model.scaffold298.14290,evm.model.scaffold201.11761,evm.model.scaffold306.14449,evm.model.scaffold17.1782,evm.model.scaffold233.12648,evm.model.scaffold69.6333,evm.model.scaffold465.17498,evm.model.scaffold564.18774,evm.model.scaffold69.6332,evm.model.scaffold564.18771,evm.model.scaf…
Biological process	developmental growth involved in morphogenesis	GO:0060560	0.111111	59	531	2.08646e-10	3.28618e-08	59	2.44532	evm.model.scaffold17.1782,evm.model.scaffold516.18216,evm.model.scaffold69.6332,evm.model.scaffold429.16970,evm.model.scaffold63.6075,evm.model.scaffold127.9382,evm.model.scaffold491.17924,evm.model.scaffold82.7109,evm.model.scaffold298.14273,evm.model.scaffold42.3806,evm.model.scaffold148.10294,evm.model.scaffold101.8201,evm.model.scaffold247.13101,evm.model.scaffold414.16778,evm.model.scaffold3…
Biological process	negative regulation of multicellular organismal process	GO:0051241	0.246704	131	531	2.14371e-10	3.31712e-08	131	1.70574	evm.model.scaffold1727.23994,evm.model.scaffold30.2966,evm.model.scaffold233.12647,evm.model.scaffold469.17610,evm.model.scaffold298.14290,evm.model.scaffold390.16245,evm.model.scaffold233.12648,evm.model.scaffold255.13354,evm.model.scaffold69.6333,evm.model.scaffold69.6332,evm.model.scaffold778.20743,evm.model.scaffold35.3322,evm.model.scaffold117.8847,evm.model.scaffold257.13419,evm.model.scaff…
Biological process	ameboidal-type cell migration	GO:0001667	0.131827	70	531	2.36014e-10	3.58904e-08	70	2.22688	evm.model.scaffold30.2966,evm.model.scaffold233.12647,evm.model.scaffold120.9126,evm.model.scaffold255.13354,evm.model.scaffold69.6332,evm.model.scaffold564.18771,evm.model.scaffold35.3322,evm.model.scaffold429.16970,evm.model.scaffold63.6075,evm.model.scaffold62.6004,evm.model.scaffold524.18311,evm.model.scaffold387.16190,evm.model.scaffold127.9382,evm.model.scaffold123.9227,evm.model.scaffold12…
Biological process	negative regulation of cellular process	GO:0048523	0.60452	321	531	2.46498e-10	3.68494e-08	321	1.28413	evm.model.scaffold1727.23994,evm.model.scaffold30.2966,evm.model.scaffold233.12647,evm.model.scaffold77.6782,evm.model.scaffold298.14290,evm.model.scaffold201.11761,evm.model.scaffold120.9126,evm.model.scaffold926.21746,evm.model.scaffold390.16245,evm.model.scaffold233.12648,evm.model.scaffold255.13354,evm.model.scaffold320.14682,evm.model.scaffold69.6333,evm.model.scaffold465.17498,evm.model.sca…
Biological process	positive regulation of phosphorylation	GO:0042327	0.182674	97	531	2.99686e-10	4.40539e-08	97	1.90775	evm.model.scaffold233.12647,evm.model.scaffold390.16245,evm.model.scaffold564.18771,evm.model.scaffold375.15950,evm.model.scaffold227.12504,evm.model.scaffold516.18218,evm.model.scaffold1018.22191,evm.model.scaffold429.16970,evm.model.scaffold668.19893,evm.model.scaffold1204.22913,evm.model.scaffold1141.22698,evm.model.scaffold450.17285,evm.model.scaffold444.17178,evm.model.scaffold113.8721,evm.m…
Biological process	developmental process	GO:0032502	0.813559	432	531	3.19167e-10	4.61484e-08	432	1.16873	evm.model.scaffold1727.23994,evm.model.scaffold30.2966,evm.model.scaffold233.12647,evm.model.scaffold77.6782,evm.model.scaffold469.17610,evm.model.scaffold117.8835,evm.model.scaffold298.14290,evm.model.scaffold201.11761,evm.model.scaffold201.11760,evm.model.scaffold306.14449,evm.model.scaffold120.9126,evm.model.scaffold17.1782,evm.model.scaffold926.21746,evm.model.scaffold390.16245,evm.model.scaf…
Biological process	regulation of response to external stimulus	GO:0032101	0.237288	126	531	3.40546e-10	4.84454e-08	126	1.71809	evm.model.scaffold30.2966,evm.model.scaffold233.12647,evm.model.scaffold306.14449,evm.model.scaffold120.9126,evm.model.scaffold17.1782,evm.model.scaffold390.16245,evm.model.scaffold233.12648,evm.model.scaffold564.18771,evm.model.scaffold778.20743,evm.model.scaffold429.16970,evm.model.scaffold524.18311,evm.model.scaffold1204.22913,evm.model.scaffold450.17285,evm.model.scaffold444.17178,evm.model.s…
Biological process	cell migration	GO:0016477	0.297552	158	531	4.1875e-10	5.8625e-08	158	1.58301	evm.model.scaffold30.2966,evm.model.scaffold233.12647,evm.model.scaffold298.14290,evm.model.scaffold120.9126,evm.model.scaffold17.1782,evm.model.scaffold926.21746,evm.model.scaffold255.13354,evm.model.scaffold320.14682,evm.model.scaffold564.18774,evm.model.scaffold69.6332,evm.model.scaffold564.18771,evm.model.scaffold35.3322,evm.model.scaffold257.13419,evm.model.scaffold142.10011,evm.model.scaffo…
Biological process	negative regulation of developmental process	GO:0051093	0.216573	115	531	4.23467e-10	5.83591e-08	115	1.7716	evm.model.scaffold1727.23994,evm.model.scaffold30.2966,evm.model.scaffold233.12647,evm.model.scaffold469.17610,evm.model.scaffold298.14290,evm.model.scaffold233.12648,evm.model.scaffold255.13354,evm.model.scaffold564.18771,evm.model.scaffold35.3322,evm.model.scaffold117.8847,evm.model.scaffold257.13419,evm.model.scaffold142.10011,evm.model.scaffold30.2989,evm.model.scaffold429.16970,evm.model.sca…
Biological process	negative regulation of response to external stimulus	GO:0032102	0.131827	70	531	5.74474e-10	7.79517e-08	70	2.18147	evm.model.scaffold30.2966,evm.model.scaffold233.12647,evm.model.scaffold306.14449,evm.model.scaffold390.16245,evm.model.scaffold233.12648,evm.model.scaffold450.17285,evm.model.scaffold444.17178,evm.model.scaffold121.9181,evm.model.scaffold195.11633,evm.model.scaffold422.16882,evm.model.scaffold117.8888,evm.model.scaffold223.12410,evm.model.scaffold685.20043,evm.model.scaffold792.20877,evm.model.s…
Biological process	growth	GO:0040007	0.265537	141	531	5.7844e-10	7.73006e-08	141	1.6377	evm.model.scaffold1727.23994,evm.model.scaffold233.12647,evm.model.scaffold66.6167,evm.model.scaffold201.11760,evm.model.scaffold17.1782,evm.model.scaffold926.21746,evm.model.scaffold233.12648,evm.model.scaffold69.6333,evm.model.scaffold516.18216,evm.model.scaffold564.18774,evm.model.scaffold69.6332,evm.model.scaffold429.16970,evm.model.scaffold63.6075,evm.model.scaffold524.18311,evm.model.scaffo…
Biological process	molting cycle	GO:0042303	0.0564972	30	531	9.65776e-10	1.27136e-07	30	3.66798	evm.model.scaffold257.13419,evm.model.scaffold63.6075,evm.model.scaffold367.15739,evm.model.scaffold1055.22339,evm.model.scaffold117.8888,evm.model.scaffold57.5666,evm.model.scaffold166.10795,evm.model.scaffold384.16141,evm.model.scaffold546.18581,evm.model.scaffold384.16138,evm.model.scaffold373.15916,evm.model.scaffold1608.23837,evm.model.scaffold564.18750,evm.model.scaffold62.5967,evm.model.sc…
Biological process	negative regulation of neurogenesis	GO:0050768	0.0715631	38	531	9.71184e-10	1.25968e-07	38	3.07012	evm.model.scaffold298.14290,evm.model.scaffold117.8847,evm.model.scaffold257.13419,evm.model.scaffold367.15739,evm.model.scaffold57.5666,evm.model.scaffold148.10294,evm.model.scaffold101.8201,evm.model.scaffold50.4590,evm.model.scaffold546.18581,evm.model.scaffold247.13101,evm.model.scaffold3.276,evm.model.scaffold351.15333,evm.model.scaffold138.9856,evm.model.scaffold6.818,evm.model.scaffold165.…
Biological process	nervous system process	GO:0050877	0.291902	155	531	1.00073e-09	1.27919e-07	155	1.57446	evm.model.scaffold233.12647,evm.model.scaffold117.8835,evm.model.scaffold298.14290,evm.model.scaffold17.1782,evm.model.scaffold69.6333,evm.model.scaffold69.6332,evm.model.scaffold564.18771,evm.model.scaffold375.15950,evm.model.scaffold778.20743,evm.model.scaffold117.8847,evm.model.scaffold227.12504,evm.model.scaffold257.13419,evm.model.scaffold142.10011,evm.model.scaffold30.2989,evm.model.scaffol…
Biological process	negative regulation of biological process	GO:0048519	0.664783	353	531	1.19224e-09	1.50223e-07	353	1.23585	evm.model.scaffold1727.23994,evm.model.scaffold30.2966,evm.model.scaffold233.12647,evm.model.scaffold77.6782,evm.model.scaffold469.17610,evm.model.scaffold298.14290,evm.model.scaffold201.11761,evm.model.scaffold306.14449,evm.model.scaffold120.9126,evm.model.scaffold926.21746,evm.model.scaffold390.16245,evm.model.scaffold233.12648,evm.model.scaffold255.13354,evm.model.scaffold320.14682,evm.model.s…
Biological process	positive regulation of cell differentiation	GO:0045597	0.20904	111	531	1.29197e-09	1.60496e-07	111	1.76178	evm.model.scaffold30.2966,evm.model.scaffold233.12647,evm.model.scaffold298.14290,evm.model.scaffold17.1782,evm.model.scaffold255.13354,evm.model.scaffold69.6332,evm.model.scaffold375.15950,evm.model.scaffold778.20743,evm.model.scaffold35.3322,evm.model.scaffold11.1075,evm.model.scaffold429.16970,evm.model.scaffold62.6004,evm.model.scaffold524.18311,evm.model.scaffold450.17285,evm.model.scaffold4…
Biological process	cell motility	GO:0048870	0.318267	169	531	1.36948e-09	1.67761e-07	169	1.52532	evm.model.scaffold30.2966,evm.model.scaffold233.12647,evm.model.scaffold298.14290,evm.model.scaffold120.9126,evm.model.scaffold17.1782,evm.model.scaffold926.21746,evm.model.scaffold255.13354,evm.model.scaffold320.14682,evm.model.scaffold564.18774,evm.model.scaffold69.6332,evm.model.scaffold564.18771,evm.model.scaffold375.15950,evm.model.scaffold35.3322,evm.model.scaffold257.13419,evm.model.scaffo…
Biological process	negative regulation of signal transduction	GO:0009968	0.259887	138	531	1.51406e-09	1.82932e-07	138	1.62655	evm.model.scaffold30.2966,evm.model.scaffold233.12647,evm.model.scaffold201.11761,evm.model.scaffold390.16245,evm.model.scaffold233.12648,evm.model.scaffold320.14682,evm.model.scaffold465.17498,evm.model.scaffold778.20743,evm.model.scaffold35.3322,evm.model.scaffold117.8847,evm.model.scaffold257.13419,evm.model.scaffold429.16970,evm.model.scaffold668.19893,evm.model.scaffold524.18311,evm.model.sc…
Biological process	cell development	GO:0048468	0.483992	257	531	1.66927e-09	1.98959e-07	257	1.34667	evm.model.scaffold1727.23994,evm.model.scaffold233.12647,evm.model.scaffold77.6782,evm.model.scaffold117.8835,evm.model.scaffold298.14290,evm.model.scaffold120.9126,evm.model.scaffold17.1782,evm.model.scaffold926.21746,evm.model.scaffold390.16245,evm.model.scaffold320.14682,evm.model.scaffold69.6333,evm.model.scaffold465.17498,evm.model.scaffold516.18216,evm.model.scaffold564.18774,evm.model.scaf…
Biological process	positive regulation of phosphorus metabolic process	GO:0010562	0.193974	103	531	1.75989e-09	2.06964e-07	103	1.80249	evm.model.scaffold233.12647,evm.model.scaffold390.16245,evm.model.scaffold564.18771,evm.model.scaffold375.15950,evm.model.scaffold227.12504,evm.model.scaffold516.18218,evm.model.scaffold1018.22191,evm.model.scaffold429.16970,evm.model.scaffold668.19893,evm.model.scaffold1204.22913,evm.model.scaffold1141.22698,evm.model.scaffold450.17285,evm.model.scaffold444.17178,evm.model.scaffold113.8721,evm.m…
Biological process	positive regulation of phosphate metabolic process	GO:0045937	0.193974	103	531	1.75989e-09	2.06964e-07	103	1.80249	evm.model.scaffold233.12647,evm.model.scaffold390.16245,evm.model.scaffold564.18771,evm.model.scaffold375.15950,evm.model.scaffold227.12504,evm.model.scaffold516.18218,evm.model.scaffold1018.22191,evm.model.scaffold429.16970,evm.model.scaffold668.19893,evm.model.scaffold1204.22913,evm.model.scaffold1141.22698,evm.model.scaffold450.17285,evm.model.scaffold444.17178,evm.model.scaffold113.8721,evm.m…
Biological process	signal transduction	GO:0007165	0.691149	367	531	2.09434e-09	2.39898e-07	367	1.21768	evm.model.scaffold30.2966,evm.model.scaffold233.12647,evm.model.scaffold66.6167,evm.model.scaffold77.6782,evm.model.scaffold469.17610,evm.model.scaffold298.14290,evm.model.scaffold201.11761,evm.model.scaffold306.14449,evm.model.scaffold120.9126,evm.model.scaffold17.1782,evm.model.scaffold926.21746,evm.model.scaffold390.16245,evm.model.scaffold233.12648,evm.model.scaffold320.14682,evm.model.scaffo…
Biological process	regulation of cell motility	GO:2000145	0.207156	110	531	2.20769e-09	2.49639e-07	110	1.75121	evm.model.scaffold30.2966,evm.model.scaffold233.12647,evm.model.scaffold17.1782,evm.model.scaffold320.14682,evm.model.scaffold564.18774,evm.model.scaffold69.6332,evm.model.scaffold375.15950,evm.model.scaffold429.16970,evm.model.scaffold63.6075,evm.model.scaffold524.18311,evm.model.scaffold127.9382,evm.model.scaffold123.9227,evm.model.scaffold360.15477,evm.model.scaffold118.8991,evm.model.scaffold…
Biological process	positive regulation of response to stimulus	GO:0048584	0.359699	191	531	2.37546e-09	2.6521e-07	191	1.45986	evm.model.scaffold30.2966,evm.model.scaffold233.12647,evm.model.scaffold66.6167,evm.model.scaffold77.6782,evm.model.scaffold469.17610,evm.model.scaffold298.14290,evm.model.scaffold120.9126,evm.model.scaffold17.1782,evm.model.scaffold564.18774,evm.model.scaffold69.6332,evm.model.scaffold778.20743,evm.model.scaffold257.13419,evm.model.scaffold429.16970,evm.model.scaffold177.11091,evm.model.scaffold…
Biological process	ossification	GO:0001503	0.126177	67	531	3.2469e-09	3.5797e-07	67	2.137	evm.model.scaffold233.12647,evm.model.scaffold233.12648,evm.model.scaffold320.14682,evm.model.scaffold564.18774,evm.model.scaffold257.13419,evm.model.scaffold142.10011,evm.model.scaffold30.2989,evm.model.scaffold429.16970,evm.model.scaffold367.15739,evm.model.scaffold121.9181,evm.model.scaffold755.20553,evm.model.scaffold360.15477,evm.model.scaffold118.8991,evm.model.scaffold193.11588,evm.model.s…
Biological process	response to endogenous stimulus	GO:0009719	0.346516	184	531	3.31008e-09	3.60431e-07	184	1.47007	evm.model.scaffold30.2966,evm.model.scaffold233.12647,evm.model.scaffold469.17610,evm.model.scaffold298.14290,evm.model.scaffold201.11761,evm.model.scaffold390.16245,evm.model.scaffold233.12648,evm.model.scaffold564.18774,evm.model.scaffold564.18771,evm.model.scaffold375.15950,evm.model.scaffold778.20743,evm.model.scaffold35.3322,evm.model.scaffold516.18218,evm.model.scaffold688.20066,evm.model.s…
Biological process	MAPK cascade	GO:0000165	0.182674	97	531	3.69497e-09	3.97434e-07	97	1.81899	evm.model.scaffold233.12647,evm.model.scaffold77.6782,evm.model.scaffold120.9126,evm.model.scaffold69.6333,evm.model.scaffold69.6332,evm.model.scaffold375.15950,evm.model.scaffold778.20743,evm.model.scaffold117.8847,evm.model.scaffold195.11636,evm.model.scaffold113.8721,evm.model.scaffold195.11633,evm.model.scaffold89.7664,evm.model.scaffold360.15477,evm.model.scaffold118.8991,evm.model.scaffold4…
Biological process	muscle system process	GO:0003012	0.135593	72	531	3.85428e-09	4.09575e-07	72	2.05842	evm.model.scaffold1727.23994,evm.model.scaffold233.12647,evm.model.scaffold201.11760,evm.model.scaffold120.9126,evm.model.scaffold17.1782,evm.model.scaffold926.21746,evm.model.scaffold564.18774,evm.model.scaffold564.18771,evm.model.scaffold257.13419,evm.model.scaffold177.11091,evm.model.scaffold11.1090,evm.model.scaffold367.15739,evm.model.scaffold755.20553,evm.model.scaffold491.17924,evm.model.s…
Biological process	muscle structure development	GO:0061061	0.178908	95	531	4.19586e-09	4.40565e-07	95	1.82918	evm.model.scaffold1727.23994,evm.model.scaffold233.12647,evm.model.scaffold201.11760,evm.model.scaffold926.21746,evm.model.scaffold564.18771,evm.model.scaffold257.13419,evm.model.scaffold142.10011,evm.model.scaffold30.2989,evm.model.scaffold429.16970,evm.model.scaffold177.11091,evm.model.scaffold63.6075,evm.model.scaffold524.18311,evm.model.scaffold387.16190,evm.model.scaffold83.7126,evm.model.sc…
Biological process	cellular response to endogenous stimulus	GO:0071495	0.291902	155	531	5.14018e-09	5.33369e-07	155	1.53908	evm.model.scaffold30.2966,evm.model.scaffold233.12647,evm.model.scaffold469.17610,evm.model.scaffold298.14290,evm.model.scaffold201.11761,evm.model.scaffold233.12648,evm.model.scaffold564.18774,evm.model.scaffold375.15950,evm.model.scaffold778.20743,evm.model.scaffold35.3322,evm.model.scaffold688.20066,evm.model.scaffold574.18975,evm.model.scaffold524.18311,evm.model.scaffold1204.22913,evm.model.…
Biological process	positive regulation of protein phosphorylation	GO:0001934	0.161959	86	531	6.71345e-09	6.88519e-07	86	1.88439	evm.model.scaffold233.12647,evm.model.scaffold390.16245,evm.model.scaffold564.18771,evm.model.scaffold227.12504,evm.model.scaffold516.18218,evm.model.scaffold1018.22191,evm.model.scaffold429.16970,evm.model.scaffold668.19893,evm.model.scaffold1204.22913,evm.model.scaffold450.17285,evm.model.scaffold113.8721,evm.model.scaffold360.15477,evm.model.scaffold118.8991,evm.model.scaffold127.9368,evm.mode…
Biological process	regulation of system process	GO:0044057	0.169492	90	531	8.14066e-09	8.25294e-07	90	1.84321	evm.model.scaffold1727.23994,evm.model.scaffold233.12647,evm.model.scaffold201.11760,evm.model.scaffold926.21746,evm.model.scaffold69.6333,evm.model.scaffold69.6332,evm.model.scaffold564.18771,evm.model.scaffold375.15950,evm.model.scaffold778.20743,evm.model.scaffold257.13419,evm.model.scaffold429.16970,evm.model.scaffold11.1090,evm.model.scaffold524.18311,evm.model.scaffold367.15739,evm.model.sc…
Biological process	regulation of response to stress	GO:0080134	0.269303	143	531	8.14976e-09	8.16828e-07	143	1.56761	evm.model.scaffold30.2966,evm.model.scaffold233.12647,evm.model.scaffold77.6782,evm.model.scaffold469.17610,evm.model.scaffold306.14449,evm.model.scaffold17.1782,evm.model.scaffold390.16245,evm.model.scaffold233.12648,evm.model.scaffold564.18771,evm.model.scaffold778.20743,evm.model.scaffold574.18975,evm.model.scaffold1204.22913,evm.model.scaffold450.17285,evm.model.scaffold444.17178,evm.model.sc…
Biological process	regulation of phosphorylation	GO:0042325	0.241055	128	531	8.48126e-09	8.40503e-07	128	1.62345	evm.model.scaffold233.12647,evm.model.scaffold926.21746,evm.model.scaffold390.16245,evm.model.scaffold233.12648,evm.model.scaffold69.6333,evm.model.scaffold564.18774,evm.model.scaffold69.6332,evm.model.scaffold564.18771,evm.model.scaffold375.15950,evm.model.scaffold227.12504,evm.model.scaffold516.18218,evm.model.scaffold1018.22191,evm.model.scaffold429.16970,evm.model.scaffold668.19893,evm.model.…
Biological process	protein phosphorylation	GO:0006468	0.259887	138	531	8.68798e-09	8.51422e-07	138	1.5838	evm.model.scaffold233.12647,evm.model.scaffold77.6782,evm.model.scaffold298.14290,evm.model.scaffold926.21746,evm.model.scaffold390.16245,evm.model.scaffold233.12648,evm.model.scaffold69.6333,evm.model.scaffold564.18774,evm.model.scaffold69.6332,evm.model.scaffold564.18771,evm.model.scaffold227.12504,evm.model.scaffold516.18218,evm.model.scaffold1018.22191,evm.model.scaffold429.16970,evm.model.sc…
Biological process	cell-cell adhesion	GO:0098609	0.186441	99	531	8.77161e-09	8.50172e-07	99	1.77483	evm.model.scaffold30.2966,evm.model.scaffold233.12647,evm.model.scaffold77.6782,evm.model.scaffold926.21746,evm.model.scaffold117.8847,evm.model.scaffold1018.22191,evm.model.scaffold63.6075,evm.model.scaffold668.19893,evm.model.scaffold62.6004,evm.model.scaffold524.18311,evm.model.scaffold450.17285,evm.model.scaffold444.17178,evm.model.scaffold121.9181,evm.model.scaffold360.15477,evm.model.scaffo…
Biological process	regulation of locomotion	GO:0040012	0.218456	116	531	8.97919e-09	8.60831e-07	116	1.67646	evm.model.scaffold30.2966,evm.model.scaffold233.12647,evm.model.scaffold120.9126,evm.model.scaffold17.1782,evm.model.scaffold320.14682,evm.model.scaffold564.18774,evm.model.scaffold69.6332,evm.model.scaffold375.15950,evm.model.scaffold778.20743,evm.model.scaffold429.16970,evm.model.scaffold63.6075,evm.model.scaffold524.18311,evm.model.scaffold127.9382,evm.model.scaffold123.9227,evm.model.scaffold…
Biological process	positive regulation of biological process	GO:0048518	0.741996	394	531	9.26667e-09	8.78839e-07	394	1.18235	evm.model.scaffold1727.23994,evm.model.scaffold30.2966,evm.model.scaffold233.12647,evm.model.scaffold66.6167,evm.model.scaffold77.6782,evm.model.scaffold469.17610,evm.model.scaffold117.8835,evm.model.scaffold298.14290,evm.model.scaffold120.9126,evm.model.scaffold17.1782,evm.model.scaffold926.21746,evm.model.scaffold390.16245,evm.model.scaffold233.12648,evm.model.scaffold255.13354,evm.model.scaffo…
Biological process	positive regulation of metabolic process	GO:0009893	0.489642	260	531	1.14596e-08	1.07525e-06	260	1.31851	evm.model.scaffold1727.23994,evm.model.scaffold233.12647,evm.model.scaffold77.6782,evm.model.scaffold469.17610,evm.model.scaffold298.14290,evm.model.scaffold120.9126,evm.model.scaffold17.1782,evm.model.scaffold926.21746,evm.model.scaffold390.16245,evm.model.scaffold69.6333,evm.model.scaffold465.17498,evm.model.scaffold564.18774,evm.model.scaffold69.6332,evm.model.scaffold564.18771,evm.model.scaff…
Biological process	cellular response to chemical stimulus	GO:0070887	0.500942	266	531	1.19635e-08	1.11071e-06	266	1.31017	evm.model.scaffold1727.23994,evm.model.scaffold30.2966,evm.model.scaffold233.12647,evm.model.scaffold469.17610,evm.model.scaffold298.14290,evm.model.scaffold201.11761,evm.model.scaffold306.14449,evm.model.scaffold17.1782,evm.model.scaffold926.21746,evm.model.scaffold233.12648,evm.model.scaffold69.6333,evm.model.scaffold465.17498,evm.model.scaffold564.18774,evm.model.scaffold69.6332,evm.model.scaf…
Biological process	negative regulation of axonogenesis	GO:0050771	0.0433145	23	531	1.23798e-08	1.1374e-06	23	4.07554	evm.model.scaffold298.14290,evm.model.scaffold117.8847,evm.model.scaffold57.5666,evm.model.scaffold148.10294,evm.model.scaffold247.13101,evm.model.scaffold3.276,evm.model.scaffold351.15333,evm.model.scaffold138.9856,evm.model.scaffold6.818,evm.model.scaffold290.14172,evm.model.scaffold250.13244,evm.model.scaffold638.19692,evm.model.scaffold435.17081,evm.model.scaffold840.21238,evm.model.scaffold3…
Biological process	cartilage development	GO:0051216	0.0772128	41	531	1.29173e-08	1.17454e-06	41	2.66644	evm.model.scaffold30.2966,evm.model.scaffold233.12647,evm.model.scaffold255.13354,evm.model.scaffold564.18774,evm.model.scaffold11.1075,evm.model.scaffold142.10011,evm.model.scaffold30.2989,evm.model.scaffold429.16970,evm.model.scaffold676.19971,evm.model.scaffold62.6004,evm.model.scaffold193.11588,evm.model.scaffold127.9368,evm.model.scaffold160.10630,evm.model.scaffold80.7030,evm.model.scaffold…
Biological process	regulation of cell adhesion	GO:0030155	0.175141	93	531	1.35524e-08	1.21972e-06	93	1.80107	evm.model.scaffold30.2966,evm.model.scaffold233.12647,evm.model.scaffold77.6782,evm.model.scaffold17.1782,evm.model.scaffold69.6332,evm.model.scaffold117.8847,evm.model.scaffold1018.22191,evm.model.scaffold429.16970,evm.model.scaffold63.6075,evm.model.scaffold668.19893,evm.model.scaffold62.6004,evm.model.scaffold524.18311,evm.model.scaffold450.17285,evm.model.scaffold121.9181,evm.model.scaffold19…
Biological process	regulation of cell migration	GO:0030334	0.193974	103	531	1.39077e-08	1.23905e-06	103	1.73383	evm.model.scaffold30.2966,evm.model.scaffold233.12647,evm.model.scaffold17.1782,evm.model.scaffold320.14682,evm.model.scaffold564.18774,evm.model.scaffold69.6332,evm.model.scaffold429.16970,evm.model.scaffold63.6075,evm.model.scaffold524.18311,evm.model.scaffold127.9382,evm.model.scaffold123.9227,evm.model.scaffold360.15477,evm.model.scaffold118.8991,evm.model.scaffold127.9368,evm.model.scaffold4…
Biological process	regulation of protein phosphorylation	GO:0001932	0.216573	115	531	1.51378e-08	1.33516e-06	115	1.66595	evm.model.scaffold233.12647,evm.model.scaffold926.21746,evm.model.scaffold390.16245,evm.model.scaffold233.12648,evm.model.scaffold69.6333,evm.model.scaffold564.18774,evm.model.scaffold69.6332,evm.model.scaffold564.18771,evm.model.scaffold227.12504,evm.model.scaffold516.18218,evm.model.scaffold1018.22191,evm.model.scaffold429.16970,evm.model.scaffold668.19893,evm.model.scaffold1204.22913,evm.model…
Biological process	cytokine production	GO:0001816	0.167608	89	531	1.7003e-08	1.48481e-06	89	1.82273	evm.model.scaffold69.6333,evm.model.scaffold465.17498,evm.model.scaffold69.6332,evm.model.scaffold257.13419,evm.model.scaffold1018.22191,evm.model.scaffold429.16970,evm.model.scaffold1204.22913,evm.model.scaffold444.17178,evm.model.scaffold367.15739,evm.model.scaffold121.9181,evm.model.scaffold755.20553,evm.model.scaffold195.11636,evm.model.scaffold113.8721,evm.model.scaffold360.15477,evm.model.s…
Biological process	muscle contraction	GO:0006936	0.112994	60	531	1.71948e-08	1.48685e-06	60	2.15552	evm.model.scaffold233.12647,evm.model.scaffold201.11760,evm.model.scaffold120.9126,evm.model.scaffold17.1782,evm.model.scaffold926.21746,evm.model.scaffold564.18774,evm.model.scaffold564.18771,evm.model.scaffold177.11091,evm.model.scaffold11.1090,evm.model.scaffold755.20553,evm.model.scaffold491.17924,evm.model.scaffold21.2089,evm.model.scaffold182.11288,evm.model.scaffold243.13040,evm.model.scaf…
Biological process	regulation of molecular function	GO:0065009	0.389831	207	531	1.73481e-08	1.48553e-06	207	1.39418	evm.model.scaffold1727.23994,evm.model.scaffold233.12647,evm.model.scaffold66.6167,evm.model.scaffold298.14290,evm.model.scaffold306.14449,evm.model.scaffold120.9126,evm.model.scaffold926.21746,evm.model.scaffold390.16245,evm.model.scaffold233.12648,evm.model.scaffold320.14682,evm.model.scaffold465.17498,evm.model.scaffold564.18771,evm.model.scaffold778.20743,evm.model.scaffold227.12504,evm.model…
Biological process	response to organic cyclic compound	GO:0014070	0.246704	131	531	1.76405e-08	1.49605e-06	131	1.59213	evm.model.scaffold233.12647,evm.model.scaffold298.14290,evm.model.scaffold17.1782,evm.model.scaffold233.12648,evm.model.scaffold564.18771,evm.model.scaffold375.15950,evm.model.scaffold778.20743,evm.model.scaffold257.13419,evm.model.scaffold516.18218,evm.model.scaffold574.18975,evm.model.scaffold524.18311,evm.model.scaffold83.7126,evm.model.scaffold1204.22913,evm.model.scaffold1141.22698,evm.model…
Biological process	modulation of chemical synaptic transmission	GO:0050804	0.137476	73	531	2.02685e-08	1.70255e-06	73	1.96595	evm.model.scaffold117.8835,evm.model.scaffold298.14290,evm.model.scaffold69.6333,evm.model.scaffold69.6332,evm.model.scaffold117.8847,evm.model.scaffold257.13419,evm.model.scaffold429.16970,evm.model.scaffold63.6075,evm.model.scaffold668.19893,evm.model.scaffold524.18311,evm.model.scaffold367.15739,evm.model.scaffold755.20553,evm.model.scaffold89.7664,evm.model.scaffold118.8991,evm.model.scaffold…
Biological process	muscle tissue development	GO:0060537	0.122411	65	531	2.03504e-08	1.6933e-06	65	2.06781	evm.model.scaffold1727.23994,evm.model.scaffold30.2966,evm.model.scaffold201.11760,evm.model.scaffold926.21746,evm.model.scaffold564.18771,evm.model.scaffold257.13419,evm.model.scaffold142.10011,evm.model.scaffold30.2989,evm.model.scaffold429.16970,evm.model.scaffold524.18311,evm.model.scaffold83.7126,evm.model.scaffold367.15739,evm.model.scaffold127.9368,evm.model.scaffold491.17924,evm.model.sca…
Biological process	positive regulation of locomotion	GO:0040017	0.148776	79	531	2.09314e-08	1.72537e-06	79	1.90138	evm.model.scaffold120.9126,evm.model.scaffold17.1782,evm.model.scaffold375.15950,evm.model.scaffold778.20743,evm.model.scaffold429.16970,evm.model.scaffold63.6075,evm.model.scaffold524.18311,evm.model.scaffold127.9382,evm.model.scaffold360.15477,evm.model.scaffold118.8991,evm.model.scaffold127.9368,evm.model.scaffold39.3591,evm.model.scaffold27.2685,evm.model.scaffold166.10795,evm.model.scaffold6…
Biological process	regulation of trans-synaptic signaling	GO:0099177	0.137476	73	531	2.1525e-08	1.75787e-06	73	1.96307	evm.model.scaffold117.8835,evm.model.scaffold298.14290,evm.model.scaffold69.6333,evm.model.scaffold69.6332,evm.model.scaffold117.8847,evm.model.scaffold257.13419,evm.model.scaffold429.16970,evm.model.scaffold63.6075,evm.model.scaffold668.19893,evm.model.scaffold524.18311,evm.model.scaffold367.15739,evm.model.scaffold755.20553,evm.model.scaffold89.7664,evm.model.scaffold118.8991,evm.model.scaffold…
Biological process	regulation of cytokine production	GO:0001817	0.154426	82	531	2.56149e-08	2.07269e-06	82	1.86469	evm.model.scaffold69.6333,evm.model.scaffold465.17498,evm.model.scaffold69.6332,evm.model.scaffold257.13419,evm.model.scaffold1018.22191,evm.model.scaffold429.16970,evm.model.scaffold1204.22913,evm.model.scaffold444.17178,evm.model.scaffold367.15739,evm.model.scaffold121.9181,evm.model.scaffold755.20553,evm.model.scaffold195.11636,evm.model.scaffold113.8721,evm.model.scaffold360.15477,evm.model.s…
Biological process	immune system process	GO:0002376	0.444444	236	531	2.57834e-08	2.06736e-06	236	1.34104	evm.model.scaffold1727.23994,evm.model.scaffold30.2966,evm.model.scaffold233.12647,evm.model.scaffold77.6782,evm.model.scaffold469.17610,evm.model.scaffold201.11760,evm.model.scaffold306.14449,evm.model.scaffold120.9126,evm.model.scaffold17.1782,evm.model.scaffold324.14811,evm.model.scaffold390.16245,evm.model.scaffold233.12648,evm.model.scaffold320.14682,evm.model.scaffold69.6333,evm.model.scaff…
Biological process	regulation of neuron projection development	GO:0010975	0.148776	79	531	2.7738e-08	2.20405e-06	79	1.88899	evm.model.scaffold233.12647,evm.model.scaffold298.14290,evm.model.scaffold69.6332,evm.model.scaffold117.8847,evm.model.scaffold257.13419,evm.model.scaffold11.1090,evm.model.scaffold367.15739,evm.model.scaffold121.9181,evm.model.scaffold127.9368,evm.model.scaffold491.17924,evm.model.scaffold59.5863,evm.model.scaffold39.3591,evm.model.scaffold42.3806,evm.model.scaffold57.5666,evm.model.scaffold148.…
Biological process	cell junction assembly	GO:0034329	0.124294	66	531	3.01767e-08	2.37642e-06	66	2.03264	evm.model.scaffold69.6333,evm.model.scaffold516.18216,evm.model.scaffold69.6332,evm.model.scaffold63.6075,evm.model.scaffold668.19893,evm.model.scaffold524.18311,evm.model.scaffold450.17285,evm.model.scaffold121.9181,evm.model.scaffold123.9227,evm.model.scaffold422.16882,evm.model.scaffold193.11588,evm.model.scaffold1097.22516,evm.model.scaffold491.17924,evm.model.scaffold408.16694,evm.model.scaf…
Biological process	regulation of hair cycle	GO:0042634	0.0244821	13	531	3.16333e-08	2.46908e-06	13	7.01232	evm.model.scaffold257.13419,evm.model.scaffold367.15739,evm.model.scaffold166.10795,evm.model.scaffold546.18581,evm.model.scaffold564.18750,evm.model.scaffold62.5967,evm.model.scaffold593.19156,evm.model.scaffold116.8795,evm.model.scaffold162.10694,evm.model.scaffold191.11537,evm.model.scaffold191.11538,evm.model.scaffold54.5565,evm.model.scaffold840.21268,
Biological process	neurogenesis	GO:0022008	0.399247	212	531	3.19662e-08	2.47317e-06	212	1.37558	evm.model.scaffold233.12647,evm.model.scaffold77.6782,evm.model.scaffold117.8835,evm.model.scaffold298.14290,evm.model.scaffold120.9126,evm.model.scaffold17.1782,evm.model.scaffold926.21746,evm.model.scaffold320.14682,evm.model.scaffold69.6333,evm.model.scaffold516.18216,evm.model.scaffold69.6332,evm.model.scaffold564.18771,evm.model.scaffold375.15950,evm.model.scaffold778.20743,evm.model.scaffol…
Biological process	chondrocyte differentiation	GO:0002062	0.0508475	27	531	3.30008e-08	2.53102e-06	27	3.40328	evm.model.scaffold30.2966,evm.model.scaffold233.12647,evm.model.scaffold255.13354,evm.model.scaffold564.18774,evm.model.scaffold142.10011,evm.model.scaffold30.2989,evm.model.scaffold62.6004,evm.model.scaffold127.9368,evm.model.scaffold160.10630,evm.model.scaffold80.7030,evm.model.scaffold685.20043,evm.model.scaffold101.8201,evm.model.scaffold50.4590,evm.model.scaffold14.1522,evm.model.scaffold414…
Biological process	regulation of synaptic plasticity	GO:0048167	0.0809793	43	531	3.36661e-08	2.55979e-06	43	2.50753	evm.model.scaffold298.14290,evm.model.scaffold117.8847,evm.model.scaffold257.13419,evm.model.scaffold668.19893,evm.model.scaffold524.18311,evm.model.scaffold367.15739,evm.model.scaffold755.20553,evm.model.scaffold89.7664,evm.model.scaffold118.8991,evm.model.scaffold82.7109,evm.model.scaffold21.2089,evm.model.scaffold42.3806,evm.model.scaffold37.3511,evm.model.scaffold538.18475,evm.model.scaffold7…
Biological process	regulation of response to wounding	GO:1903034	0.0753296	40	531	3.49007e-08	2.63098e-06	40	2.61067	evm.model.scaffold30.2966,evm.model.scaffold17.1782,evm.model.scaffold390.16245,evm.model.scaffold450.17285,evm.model.scaffold121.9181,evm.model.scaffold422.16882,evm.model.scaffold117.8888,evm.model.scaffold1653.23894,evm.model.scaffold69.6292,evm.model.scaffold384.16141,evm.model.scaffold1432.23534,evm.model.scaffold45.4005,evm.model.scaffold384.16138,evm.model.scaffold3.276,evm.model.scaffold3…
Biological process	developmental cell growth	GO:0048588	0.0979284	52	531	3.56186e-08	2.66234e-06	52	2.26258	evm.model.scaffold17.1782,evm.model.scaffold516.18216,evm.model.scaffold69.6332,evm.model.scaffold491.17924,evm.model.scaffold82.7109,evm.model.scaffold298.14273,evm.model.scaffold148.10294,evm.model.scaffold247.13101,evm.model.scaffold108.8545,evm.model.scaffold3.276,evm.model.scaffold86.7243,evm.model.scaffold12.1152,evm.model.scaffold313.14534,evm.model.scaffold261.13531,evm.model.scaffold351.…
Biological process	cell differentiation	GO:0030154	0.642185	341	531	3.64719e-08	2.70321e-06	341	1.21826	evm.model.scaffold1727.23994,evm.model.scaffold30.2966,evm.model.scaffold233.12647,evm.model.scaffold77.6782,evm.model.scaffold117.8835,evm.model.scaffold298.14290,evm.model.scaffold201.11761,evm.model.scaffold120.9126,evm.model.scaffold17.1782,evm.model.scaffold926.21746,evm.model.scaffold390.16245,evm.model.scaffold233.12648,evm.model.scaffold255.13354,evm.model.scaffold320.14682,evm.model.scaf…
Biological process	transmembrane receptor protein tyrosine kinase signaling pathway	GO:0007169	0.161959	86	531	4.39855e-08	3.23293e-06	86	1.80875	evm.model.scaffold30.2966,evm.model.scaffold233.12647,evm.model.scaffold77.6782,evm.model.scaffold298.14290,evm.model.scaffold120.9126,evm.model.scaffold233.12648,evm.model.scaffold564.18774,evm.model.scaffold564.18771,evm.model.scaffold257.13419,evm.model.scaffold11.1090,evm.model.scaffold444.17178,evm.model.scaffold367.15739,evm.model.scaffold1706.23981,evm.model.scaffold127.9382,evm.model.scaf…
Biological process	connective tissue development	GO:0061448	0.0903955	48	531	5.38205e-08	3.92312e-06	48	2.3258	evm.model.scaffold30.2966,evm.model.scaffold233.12647,evm.model.scaffold255.13354,evm.model.scaffold564.18774,evm.model.scaffold11.1075,evm.model.scaffold142.10011,evm.model.scaffold30.2989,evm.model.scaffold429.16970,evm.model.scaffold676.19971,evm.model.scaffold62.6004,evm.model.scaffold193.11588,evm.model.scaffold127.9368,evm.model.scaffold160.10630,evm.model.scaffold80.7030,evm.model.scaffold…
Biological process	cellular developmental process	GO:0048869	0.642185	341	531	5.48438e-08	3.96494e-06	341	1.21459	evm.model.scaffold1727.23994,evm.model.scaffold30.2966,evm.model.scaffold233.12647,evm.model.scaffold77.6782,evm.model.scaffold117.8835,evm.model.scaffold298.14290,evm.model.scaffold201.11761,evm.model.scaffold120.9126,evm.model.scaffold17.1782,evm.model.scaffold926.21746,evm.model.scaffold390.16245,evm.model.scaffold233.12648,evm.model.scaffold255.13354,evm.model.scaffold320.14682,evm.model.scaf…
Biological process	regulation of cell projection organization	GO:0031344	0.177024	94	531	5.66254e-08	4.06045e-06	94	1.74137	evm.model.scaffold30.2966,evm.model.scaffold233.12647,evm.model.scaffold298.14290,evm.model.scaffold69.6332,evm.model.scaffold117.8847,evm.model.scaffold257.13419,evm.model.scaffold688.20066,evm.model.scaffold11.1090,evm.model.scaffold367.15739,evm.model.scaffold121.9181,evm.model.scaffold127.9368,evm.model.scaffold491.17924,evm.model.scaffold408.16694,evm.model.scaffold59.5863,evm.model.scaffold…
Biological process	cell growth	GO:0016049	0.148776	79	531	5.67092e-08	4.03367e-06	79	1.85751	evm.model.scaffold233.12647,evm.model.scaffold17.1782,evm.model.scaffold233.12648,evm.model.scaffold516.18216,evm.model.scaffold69.6332,evm.model.scaffold121.9181,evm.model.scaffold491.17924,evm.model.scaffold699.20193,evm.model.scaffold39.3589,evm.model.scaffold82.7109,evm.model.scaffold298.14273,evm.model.scaffold685.20043,evm.model.scaffold166.10795,evm.model.scaffold148.10294,evm.model.scaffo…
Biological process	positive regulation of signal transduction	GO:0009967	0.271186	144	531	5.97278e-08	4.2144e-06	144	1.51692	evm.model.scaffold30.2966,evm.model.scaffold233.12647,evm.model.scaffold66.6167,evm.model.scaffold77.6782,evm.model.scaffold469.17610,evm.model.scaffold298.14290,evm.model.scaffold17.1782,evm.model.scaffold564.18774,evm.model.scaffold69.6332,evm.model.scaffold778.20743,evm.model.scaffold257.13419,evm.model.scaffold177.11091,evm.model.scaffold62.6004,evm.model.scaffold524.18311,evm.model.scaffold1…
Biological process	regulation of phosphorus metabolic process	GO:0051174	0.26177	139	531	8.11297e-08	5.67908e-06	139	1.52513	evm.model.scaffold233.12647,evm.model.scaffold926.21746,evm.model.scaffold390.16245,evm.model.scaffold233.12648,evm.model.scaffold69.6333,evm.model.scaffold564.18774,evm.model.scaffold69.6332,evm.model.scaffold564.18771,evm.model.scaffold375.15950,evm.model.scaffold227.12504,evm.model.scaffold516.18218,evm.model.scaffold1018.22191,evm.model.scaffold429.16970,evm.model.scaffold668.19893,evm.model.…
Biological process	regulation of phosphate metabolic process	GO:0019220	0.26177	139	531	8.11297e-08	5.67908e-06	139	1.52513	evm.model.scaffold233.12647,evm.model.scaffold926.21746,evm.model.scaffold390.16245,evm.model.scaffold233.12648,evm.model.scaffold69.6333,evm.model.scaffold564.18774,evm.model.scaffold69.6332,evm.model.scaffold564.18771,evm.model.scaffold375.15950,evm.model.scaffold227.12504,evm.model.scaffold516.18218,evm.model.scaffold1018.22191,evm.model.scaffold429.16970,evm.model.scaffold668.19893,evm.model.…
Biological process	tube development	GO:0035295	0.3258	173	531	8.30844e-08	5.72503e-06	173	1.43404	evm.model.scaffold30.2966,evm.model.scaffold233.12647,evm.model.scaffold306.14449,evm.model.scaffold120.9126,evm.model.scaffold17.1782,evm.model.scaffold390.16245,evm.model.scaffold255.13354,evm.model.scaffold320.14682,evm.model.scaffold564.18774,evm.model.scaffold564.18771,evm.model.scaffold1229.23004,evm.model.scaffold35.3322,evm.model.scaffold117.8847,evm.model.scaffold11.1075,evm.model.scaffo…
Biological process	regulation of plasma membrane bounded cell projection organization	GO:0120035	0.173258	92	531	8.31227e-08	5.68327e-06	92	1.74035	evm.model.scaffold30.2966,evm.model.scaffold233.12647,evm.model.scaffold298.14290,evm.model.scaffold69.6332,evm.model.scaffold117.8847,evm.model.scaffold257.13419,evm.model.scaffold688.20066,evm.model.scaffold11.1090,evm.model.scaffold367.15739,evm.model.scaffold121.9181,evm.model.scaffold127.9368,evm.model.scaffold491.17924,evm.model.scaffold408.16694,evm.model.scaffold59.5863,evm.model.scaffold…
Biological process	biological regulation	GO:0065007	0.937853	498	531	8.33257e-08	5.65333e-06	498	1.08125	evm.model.scaffold1727.23994,evm.model.scaffold30.2966,evm.model.scaffold233.12647,evm.model.scaffold66.6167,evm.model.scaffold77.6782,evm.model.scaffold469.17610,evm.model.scaffold117.8835,evm.model.scaffold298.14290,evm.model.scaffold201.11761,evm.model.scaffold201.11760,evm.model.scaffold306.14449,evm.model.scaffold120.9126,evm.model.scaffold17.1782,evm.model.scaffold926.21746,evm.model.scaffo…
Biological process	positive regulation of cell motility	GO:2000147	0.137476	73	531	9.70223e-08	6.53234e-06	73	1.89098	evm.model.scaffold17.1782,evm.model.scaffold375.15950,evm.model.scaffold429.16970,evm.model.scaffold524.18311,evm.model.scaffold127.9382,evm.model.scaffold360.15477,evm.model.scaffold118.8991,evm.model.scaffold127.9368,evm.model.scaffold39.3591,evm.model.scaffold27.2685,evm.model.scaffold166.10795,evm.model.scaffold69.6292,evm.model.scaffold101.8201,evm.model.scaffold384.16141,evm.model.scaffold5…
Biological process	morphogenesis of a branching structure	GO:0001763	0.0885122	47	531	1.14467e-07	7.64846e-06	47	2.29249	evm.model.scaffold30.2966,evm.model.scaffold120.9126,evm.model.scaffold257.13419,evm.model.scaffold63.6075,evm.model.scaffold668.19893,evm.model.scaffold1141.22698,evm.model.scaffold367.15739,evm.model.scaffold127.9368,evm.model.scaffold685.20043,evm.model.scaffold57.5666,evm.model.scaffold538.18475,evm.model.scaffold45.4005,evm.model.scaffold20.2039,evm.model.scaffold247.13101,evm.model.scaffold…
Biological process	hair cycle	GO:0042633	0.0433145	23	531	1.42441e-07	9.44609e-06	23	3.57473	evm.model.scaffold257.13419,evm.model.scaffold63.6075,evm.model.scaffold367.15739,evm.model.scaffold117.8888,evm.model.scaffold57.5666,evm.model.scaffold166.10795,evm.model.scaffold546.18581,evm.model.scaffold373.15916,evm.model.scaffold1608.23837,evm.model.scaffold564.18750,evm.model.scaffold62.5967,evm.model.scaffold593.19156,evm.model.scaffold116.8795,evm.model.scaffold162.10694,evm.model.scaf…
Biological process	muscle cell differentiation	GO:0042692	0.120527	64	531	1.44111e-07	9.48554e-06	64	1.97436	evm.model.scaffold233.12647,evm.model.scaffold926.21746,evm.model.scaffold564.18771,evm.model.scaffold257.13419,evm.model.scaffold177.11091,evm.model.scaffold524.18311,evm.model.scaffold367.15739,evm.model.scaffold693.20101,evm.model.scaffold120.9152,evm.model.scaffold408.16694,evm.model.scaffold59.5863,evm.model.scaffold39.3591,evm.model.scaffold685.20043,evm.model.scaffold21.2089,evm.model.scaf…
Biological process	skeletal system development	GO:0001501	0.131827	70	531	1.52378e-07	9.95534e-06	70	1.90051	evm.model.scaffold30.2966,evm.model.scaffold233.12647,evm.model.scaffold390.16245,evm.model.scaffold255.13354,evm.model.scaffold564.18774,evm.model.scaffold564.18771,evm.model.scaffold11.1075,evm.model.scaffold142.10011,evm.model.scaffold30.2989,evm.model.scaffold429.16970,evm.model.scaffold676.19971,evm.model.scaffold62.6004,evm.model.scaffold193.11588,evm.model.scaffold127.9368,evm.model.scaffo…
Biological process	endothelial cell migration	GO:0043542	0.0734463	39	531	1.5329e-07	9.94132e-06	39	2.50528	evm.model.scaffold30.2966,evm.model.scaffold233.12647,evm.model.scaffold255.13354,evm.model.scaffold62.6004,evm.model.scaffold524.18311,evm.model.scaffold127.9382,evm.model.scaffold123.9227,evm.model.scaffold127.9368,evm.model.scaffold39.3591,evm.model.scaffold685.20043,evm.model.scaffold21.2089,evm.model.scaffold27.2685,evm.model.scaffold69.6292,evm.model.scaffold101.8201,evm.model.scaffold50.45…
Biological process	long-term synaptic potentiation	GO:0060291	0.0451977	24	531	1.58234e-07	1.01871e-05	24	3.43874	evm.model.scaffold298.14290,evm.model.scaffold257.13419,evm.model.scaffold524.18311,evm.model.scaffold367.15739,evm.model.scaffold118.8991,evm.model.scaffold21.2089,evm.model.scaffold802.20920,evm.model.scaffold783.20810,evm.model.scaffold3.276,evm.model.scaffold265.13610,evm.model.scaffold934.21786,evm.model.scaffold290.14174,evm.model.scaffold1222.22985,evm.model.scaffold54.5530,evm.model.scaff…
Biological process	regulation of biological process	GO:0050789	0.920904	489	531	1.64074e-07	1.04864e-05	489	1.08719	evm.model.scaffold1727.23994,evm.model.scaffold30.2966,evm.model.scaffold233.12647,evm.model.scaffold66.6167,evm.model.scaffold77.6782,evm.model.scaffold469.17610,evm.model.scaffold117.8835,evm.model.scaffold298.14290,evm.model.scaffold201.11761,evm.model.scaffold201.11760,evm.model.scaffold306.14449,evm.model.scaffold120.9126,evm.model.scaffold17.1782,evm.model.scaffold926.21746,evm.model.scaffo…
Biological process	response to external stimulus	GO:0009605	0.53484	284	531	1.78541e-07	1.1329e-05	284	1.25704	evm.model.scaffold30.2966,evm.model.scaffold233.12647,evm.model.scaffold77.6782,evm.model.scaffold469.17610,evm.model.scaffold117.8835,evm.model.scaffold298.14290,evm.model.scaffold306.14449,evm.model.scaffold120.9126,evm.model.scaffold17.1782,evm.model.scaffold926.21746,evm.model.scaffold390.16245,evm.model.scaffold233.12648,evm.model.scaffold69.6333,evm.model.scaffold465.17498,evm.model.scaffol…
Biological process	regulation of synapse structure or activity	GO:0050803	0.0903955	48	531	1.86266e-07	1.17348e-05	48	2.23147	evm.model.scaffold298.14290,evm.model.scaffold69.6333,evm.model.scaffold516.18216,evm.model.scaffold69.6332,evm.model.scaffold117.8847,evm.model.scaffold257.13419,evm.model.scaffold63.6075,evm.model.scaffold450.17285,evm.model.scaffold367.15739,evm.model.scaffold193.11588,evm.model.scaffold59.5863,evm.model.scaffold39.3591,evm.model.scaffold42.3806,evm.model.scaffold57.5666,evm.model.scaffold37.3…
Biological process	melanin metabolic process	GO:0006582	0.0244821	13	531	2.02434e-07	1.26629e-05	13	6.03592	evm.model.scaffold63.6075,evm.model.scaffold280.14000,evm.model.scaffold360.15477,evm.model.scaffold704.20212,evm.model.scaffold408.16694,evm.model.scaffold45.4062,evm.model.scaffold165.10758,evm.model.scaffold934.21786,evm.model.scaffold292.14185,evm.model.scaffold708.20241,evm.model.scaffold531.18409,evm.model.scaffold1088.22456,evm.model.scaffold56.5642,
Biological process	secretion	GO:0046903	0.286252	152	531	2.08739e-07	1.29653e-05	152	1.46488	evm.model.scaffold233.12647,evm.model.scaffold77.6782,evm.model.scaffold117.8835,evm.model.scaffold298.14290,evm.model.scaffold926.21746,evm.model.scaffold390.16245,evm.model.scaffold320.14682,evm.model.scaffold69.6333,evm.model.scaffold564.18774,evm.model.scaffold69.6332,evm.model.scaffold564.18771,evm.model.scaffold375.15950,evm.model.scaffold778.20743,evm.model.scaffold1229.23004,evm.model.sca…
Biological process	positive regulation of synaptic transmission	GO:0050806	0.0640301	34	531	2.13977e-07	1.31978e-05	34	2.67621	evm.model.scaffold117.8835,evm.model.scaffold298.14290,evm.model.scaffold69.6333,evm.model.scaffold69.6332,evm.model.scaffold257.13419,evm.model.scaffold63.6075,evm.model.scaffold524.18311,evm.model.scaffold367.15739,evm.model.scaffold89.7664,evm.model.scaffold118.8991,evm.model.scaffold408.16694,evm.model.scaffold21.2089,evm.model.scaffold802.20920,evm.model.scaffold783.20810,evm.model.scaffold3…
Biological process	morphogenesis of a branching epithelium	GO:0061138	0.0828625	44	531	2.15803e-07	1.32179e-05	44	2.31884	evm.model.scaffold30.2966,evm.model.scaffold120.9126,evm.model.scaffold257.13419,evm.model.scaffold63.6075,evm.model.scaffold1141.22698,evm.model.scaffold367.15739,evm.model.scaffold127.9368,evm.model.scaffold685.20043,evm.model.scaffold57.5666,evm.model.scaffold538.18475,evm.model.scaffold45.4005,evm.model.scaffold20.2039,evm.model.scaffold247.13101,evm.model.scaffold414.16778,evm.model.scaffold…
Biological process	muscle cell proliferation	GO:0033002	0.0715631	38	531	2.18617e-07	1.32979e-05	38	2.5069	evm.model.scaffold1727.23994,evm.model.scaffold233.12647,evm.model.scaffold298.14290,evm.model.scaffold564.18774,evm.model.scaffold429.16970,evm.model.scaffold524.18311,evm.model.scaffold127.9368,evm.model.scaffold1579.23795,evm.model.scaffold39.3591,evm.model.scaffold166.10795,evm.model.scaffold243.13040,evm.model.scaffold546.18581,evm.model.scaffold406.16625,evm.model.scaffold45.4005,evm.model.…
Biological process	synapse assembly	GO:0007416	0.0772128	41	531	2.24856e-07	1.35838e-05	41	2.40235	evm.model.scaffold69.6333,evm.model.scaffold516.18216,evm.model.scaffold69.6332,evm.model.scaffold63.6075,evm.model.scaffold450.17285,evm.model.scaffold121.9181,evm.model.scaffold422.16882,evm.model.scaffold193.11588,evm.model.scaffold59.5863,evm.model.scaffold888.21532,evm.model.scaffold39.3591,evm.model.scaffold57.5666,evm.model.scaffold101.8201,evm.model.scaffold50.4590,evm.model.scaffold138.9…
Biological process	response to wounding	GO:0009611	0.167608	89	531	2.55312e-07	1.53187e-05	89	1.71726	evm.model.scaffold30.2966,evm.model.scaffold233.12647,evm.model.scaffold77.6782,evm.model.scaffold117.8835,evm.model.scaffold17.1782,evm.model.scaffold926.21746,evm.model.scaffold390.16245,evm.model.scaffold69.6332,evm.model.scaffold778.20743,evm.model.scaffold142.10011,evm.model.scaffold30.2989,evm.model.scaffold524.18311,evm.model.scaffold450.17285,evm.model.scaffold444.17178,evm.model.scaffold…
Biological process	positive regulation of cellular process	GO:0048522	0.691149	367	531	2.65518e-07	1.58235e-05	367	1.17918	evm.model.scaffold1727.23994,evm.model.scaffold30.2966,evm.model.scaffold233.12647,evm.model.scaffold66.6167,evm.model.scaffold77.6782,evm.model.scaffold469.17610,evm.model.scaffold117.8835,evm.model.scaffold298.14290,evm.model.scaffold120.9126,evm.model.scaffold17.1782,evm.model.scaffold926.21746,evm.model.scaffold390.16245,evm.model.scaffold255.13354,evm.model.scaffold69.6333,evm.model.scaffold…
Biological process	response to lipid	GO:0033993	0.231638	123	531	2.6895e-07	1.59204e-05	123	1.54826	evm.model.scaffold30.2966,evm.model.scaffold233.12647,evm.model.scaffold298.14290,evm.model.scaffold465.17498,evm.model.scaffold564.18771,evm.model.scaffold778.20743,evm.model.scaffold257.13419,evm.model.scaffold516.18218,evm.model.scaffold1018.22191,evm.model.scaffold676.19971,evm.model.scaffold574.18975,evm.model.scaffold524.18311,evm.model.scaffold83.7126,evm.model.scaffold1204.22913,evm.model…
Biological process	cardiac muscle tissue development	GO:0048738	0.079096	42	531	2.81989e-07	1.6581e-05	42	2.35199	evm.model.scaffold1727.23994,evm.model.scaffold30.2966,evm.model.scaffold926.21746,evm.model.scaffold142.10011,evm.model.scaffold30.2989,evm.model.scaffold429.16970,evm.model.scaffold524.18311,evm.model.scaffold127.9368,evm.model.scaffold491.17924,evm.model.scaffold59.5863,evm.model.scaffold685.20043,evm.model.scaffold166.10795,evm.model.scaffold243.13040,evm.model.scaffold538.18475,evm.model.sca…
Biological process	cell-cell adhesion via plasma-membrane adhesion molecules	GO:0098742	0.0734463	39	531	3.11549e-07	1.81978e-05	39	2.43699	evm.model.scaffold233.12647,evm.model.scaffold926.21746,evm.model.scaffold1018.22191,evm.model.scaffold668.19893,evm.model.scaffold524.18311,evm.model.scaffold121.9181,evm.model.scaffold117.8888,evm.model.scaffold39.3591,evm.model.scaffold311.14510,evm.model.scaffold571.18873,evm.model.scaffold351.15333,evm.model.scaffold1115.22607,evm.model.scaffold265.13610,evm.model.scaffold265.13608,evm.model…
Biological process	neuron projection extension	GO:1990138	0.0696798	37	531	3.1163e-07	1.80827e-05	37	2.5086	evm.model.scaffold17.1782,evm.model.scaffold516.18216,evm.model.scaffold69.6332,evm.model.scaffold491.17924,evm.model.scaffold82.7109,evm.model.scaffold298.14273,evm.model.scaffold148.10294,evm.model.scaffold247.13101,evm.model.scaffold3.276,evm.model.scaffold12.1152,evm.model.scaffold261.13531,evm.model.scaffold351.15333,evm.model.scaffold165.10758,evm.model.scaffold586.19075,evm.model.scaffold4…
Biological process	bone regeneration	GO:1990523	0.0112994	6	531	3.20827e-07	1.84947e-05	6	18.3399	evm.model.scaffold233.12647,evm.model.scaffold373.15916,evm.model.scaffold308.14483,evm.model.scaffold47.4138,evm.model.scaffold275.13884,evm.model.scaffold79.6968,
Biological process	response to mechanical stimulus	GO:0009612	0.086629	46	531	3.25755e-07	1.86569e-05	46	2.2348	evm.model.scaffold233.12647,evm.model.scaffold117.8835,evm.model.scaffold298.14290,evm.model.scaffold17.1782,evm.model.scaffold926.21746,evm.model.scaffold233.12648,evm.model.scaffold142.10011,evm.model.scaffold30.2989,evm.model.scaffold83.7126,evm.model.scaffold755.20553,evm.model.scaffold195.11636,evm.model.scaffold978.22000,evm.model.scaffold865.21421,evm.model.scaffold170.10903,evm.model.scaf…
Biological process	circulatory system development	GO:0072359	0.312618	166	531	3.3307e-07	1.89528e-05	166	1.42097	evm.model.scaffold1727.23994,evm.model.scaffold30.2966,evm.model.scaffold233.12647,evm.model.scaffold306.14449,evm.model.scaffold17.1782,evm.model.scaffold926.21746,evm.model.scaffold390.16245,evm.model.scaffold255.13354,evm.model.scaffold320.14682,evm.model.scaffold564.18771,evm.model.scaffold35.3322,evm.model.scaffold117.8847,evm.model.scaffold11.1075,evm.model.scaffold257.13419,evm.model.scaff…
Biological process	striated muscle tissue development	GO:0014706	0.0809793	43	531	3.33489e-07	1.8855e-05	43	2.30927	evm.model.scaffold1727.23994,evm.model.scaffold30.2966,evm.model.scaffold926.21746,evm.model.scaffold142.10011,evm.model.scaffold30.2989,evm.model.scaffold429.16970,evm.model.scaffold524.18311,evm.model.scaffold127.9368,evm.model.scaffold491.17924,evm.model.scaffold59.5863,evm.model.scaffold685.20043,evm.model.scaffold166.10795,evm.model.scaffold243.13040,evm.model.scaffold538.18475,evm.model.sca…
Biological process	cellular response to stimulus	GO:0051716	0.774011	411	531	3.38423e-07	1.90121e-05	411	1.14416	evm.model.scaffold1727.23994,evm.model.scaffold30.2966,evm.model.scaffold233.12647,evm.model.scaffold66.6167,evm.model.scaffold77.6782,evm.model.scaffold469.17610,evm.model.scaffold298.14290,evm.model.scaffold201.11761,evm.model.scaffold306.14449,evm.model.scaffold120.9126,evm.model.scaffold17.1782,evm.model.scaffold926.21746,evm.model.scaffold390.16245,evm.model.scaffold233.12648,evm.model.scaff…
Biological process	sensory system development	GO:0048880	0.137476	73	531	3.63706e-07	2.03031e-05	73	1.82773	evm.model.scaffold30.2966,evm.model.scaffold233.12647,evm.model.scaffold320.14682,evm.model.scaffold375.15952,evm.model.scaffold142.10011,evm.model.scaffold30.2989,evm.model.scaffold429.16970,evm.model.scaffold177.11091,evm.model.scaffold63.6075,evm.model.scaffold83.7126,evm.model.scaffold450.17285,evm.model.scaffold444.17178,evm.model.scaffold426.16937,evm.model.scaffold121.9181,evm.model.scaffo…
Biological process	inflammatory response	GO:0006954	0.160075	85	531	3.91892e-07	2.17389e-05	85	1.72731	evm.model.scaffold30.2966,evm.model.scaffold233.12647,evm.model.scaffold306.14449,evm.model.scaffold17.1782,evm.model.scaffold233.12648,evm.model.scaffold564.18771,evm.model.scaffold375.15950,evm.model.scaffold778.20743,evm.model.scaffold257.13419,evm.model.scaffold1018.22191,evm.model.scaffold429.16970,evm.model.scaffold62.6004,evm.model.scaffold444.17178,evm.model.scaffold367.15739,evm.model.sc…
Biological process	response to stimulus	GO:0050896	0.86629	460	531	4.02278e-07	2.21756e-05	460	1.10692	evm.model.scaffold1727.23994,evm.model.scaffold30.2966,evm.model.scaffold233.12647,evm.model.scaffold66.6167,evm.model.scaffold77.6782,evm.model.scaffold469.17610,evm.model.scaffold117.8835,evm.model.scaffold298.14290,evm.model.scaffold201.11761,evm.model.scaffold201.11760,evm.model.scaffold306.14449,evm.model.scaffold120.9126,evm.model.scaffold17.1782,evm.model.scaffold926.21746,evm.model.scaffo…
Biological process	epithelial cell migration	GO:0010631	0.0922787	49	531	4.47491e-07	2.45147e-05	49	2.14476	evm.model.scaffold30.2966,evm.model.scaffold233.12647,evm.model.scaffold255.13354,evm.model.scaffold69.6332,evm.model.scaffold62.6004,evm.model.scaffold524.18311,evm.model.scaffold127.9382,evm.model.scaffold123.9227,evm.model.scaffold127.9368,evm.model.scaffold491.17924,evm.model.scaffold39.3591,evm.model.scaffold685.20043,evm.model.scaffold21.2089,evm.model.scaffold27.2685,evm.model.scaffold166.…
Biological process	response to growth factor	GO:0070848	0.169492	90	531	4.51903e-07	2.46036e-05	90	1.68859	evm.model.scaffold30.2966,evm.model.scaffold233.12647,evm.model.scaffold469.17610,evm.model.scaffold201.11761,evm.model.scaffold233.12648,evm.model.scaffold564.18774,evm.model.scaffold778.20743,evm.model.scaffold35.3322,evm.model.scaffold688.20066,evm.model.scaffold127.9382,evm.model.scaffold118.8991,evm.model.scaffold117.8888,evm.model.scaffold127.9368,evm.model.scaffold865.21421,evm.model.scaff…
Biological process	generation of neurons	GO:0048699	0.359699	191	531	4.76516e-07	2.57845e-05	191	1.36513	evm.model.scaffold233.12647,evm.model.scaffold77.6782,evm.model.scaffold117.8835,evm.model.scaffold298.14290,evm.model.scaffold120.9126,evm.model.scaffold17.1782,evm.model.scaffold926.21746,evm.model.scaffold69.6333,evm.model.scaffold516.18216,evm.model.scaffold69.6332,evm.model.scaffold564.18771,evm.model.scaffold375.15952,evm.model.scaffold35.3322,evm.model.scaffold117.8847,evm.model.scaffold11…
Biological process	export from cell	GO:0140352	0.26742	142	531	4.84023e-07	2.6031e-05	142	1.47175	evm.model.scaffold233.12647,evm.model.scaffold77.6782,evm.model.scaffold117.8835,evm.model.scaffold298.14290,evm.model.scaffold926.21746,evm.model.scaffold320.14682,evm.model.scaffold69.6333,evm.model.scaffold564.18774,evm.model.scaffold69.6332,evm.model.scaffold375.15950,evm.model.scaffold778.20743,evm.model.scaffold1229.23004,evm.model.scaffold375.15952,evm.model.scaffold1204.22913,evm.model.sc…
Biological process	multicellular organismal signaling	GO:0035637	0.0677966	36	531	4.86132e-07	2.59859e-05	36	2.5009	evm.model.scaffold69.6333,evm.model.scaffold69.6332,evm.model.scaffold429.16970,evm.model.scaffold524.18311,evm.model.scaffold755.20553,evm.model.scaffold89.7664,evm.model.scaffold491.17924,evm.model.scaffold182.11288,evm.model.scaffold243.13040,evm.model.scaffold26.2622,evm.model.scaffold3.276,evm.model.scaffold351.15333,evm.model.scaffold265.13610,evm.model.scaffold165.10758,evm.model.scaffold2…
Biological process	regulation of cellular response to growth factor stimulus	GO:0090287	0.0847458	45	531	4.99877e-07	2.65597e-05	45	2.22452	evm.model.scaffold30.2966,evm.model.scaffold469.17610,evm.model.scaffold201.11761,evm.model.scaffold688.20066,evm.model.scaffold127.9382,evm.model.scaffold117.8888,evm.model.scaffold127.9368,evm.model.scaffold59.5863,evm.model.scaffold298.14273,evm.model.scaffold685.20043,evm.model.scaffold459.17451,evm.model.scaffold27.2685,evm.model.scaffold338.15039,evm.model.scaffold69.6292,evm.model.scaffold…
Biological process	molting cycle process	GO:0022404	0.039548	21	531	5.16872e-07	2.72983e-05	21	3.5661	evm.model.scaffold63.6075,evm.model.scaffold117.8888,evm.model.scaffold57.5666,evm.model.scaffold166.10795,evm.model.scaffold384.16141,evm.model.scaffold384.16138,evm.model.scaffold373.15916,evm.model.scaffold1608.23837,evm.model.scaffold564.18750,evm.model.scaffold593.19156,evm.model.scaffold67.6219,evm.model.scaffold162.10694,evm.model.scaffold531.18409,evm.model.scaffold191.11537,evm.model.sca…
Biological process	regulation of inflammatory response	GO:0050727	0.0885122	47	531	5.31417e-07	2.78994e-05	47	2.17396	evm.model.scaffold30.2966,evm.model.scaffold233.12647,evm.model.scaffold306.14449,evm.model.scaffold233.12648,evm.model.scaffold564.18771,evm.model.scaffold444.17178,evm.model.scaffold121.9181,evm.model.scaffold113.8721,evm.model.scaffold195.11633,evm.model.scaffold865.21421,evm.model.scaffold693.20101,evm.model.scaffold120.9152,evm.model.scaffold69.6299,evm.model.scaffold538.18475,evm.model.scaf…
Biological process	epithelium migration	GO:0090132	0.0922787	49	531	5.32369e-07	2.7784e-05	49	2.13204	evm.model.scaffold30.2966,evm.model.scaffold233.12647,evm.model.scaffold255.13354,evm.model.scaffold69.6332,evm.model.scaffold62.6004,evm.model.scaffold524.18311,evm.model.scaffold127.9382,evm.model.scaffold123.9227,evm.model.scaffold127.9368,evm.model.scaffold491.17924,evm.model.scaffold39.3591,evm.model.scaffold685.20043,evm.model.scaffold21.2089,evm.model.scaffold27.2685,evm.model.scaffold166.…
Biological process	negative regulation of growth	GO:0045926	0.0847458	45	531	5.38389e-07	2.79329e-05	45	2.21854	evm.model.scaffold1727.23994,evm.model.scaffold233.12647,evm.model.scaffold233.12648,evm.model.scaffold63.6075,evm.model.scaffold524.18311,evm.model.scaffold699.20193,evm.model.scaffold39.3589,evm.model.scaffold685.20043,evm.model.scaffold459.17451,evm.model.scaffold166.10795,evm.model.scaffold148.10294,evm.model.scaffold454.17353,evm.model.scaffold148.10260,evm.model.scaffold783.20810,evm.model.…
Biological process	lymphocyte activation	GO:0046649	0.150659	80	531	6.01574e-07	3.10286e-05	80	1.74562	evm.model.scaffold233.12647,evm.model.scaffold77.6782,evm.model.scaffold320.14682,evm.model.scaffold465.17498,evm.model.scaffold117.8847,evm.model.scaffold257.13419,evm.model.scaffold1018.22191,evm.model.scaffold62.6004,evm.model.scaffold524.18311,evm.model.scaffold450.17285,evm.model.scaffold444.17178,evm.model.scaffold367.15739,evm.model.scaffold113.8721,evm.model.scaffold360.15477,evm.model.sc…
Biological process	cell population proliferation	GO:0008283	0.399247	212	531	6.03602e-07	3.09522e-05	212	1.32766	evm.model.scaffold1727.23994,evm.model.scaffold233.12647,evm.model.scaffold77.6782,evm.model.scaffold298.14290,evm.model.scaffold120.9126,evm.model.scaffold926.21746,evm.model.scaffold390.16245,evm.model.scaffold233.12648,evm.model.scaffold255.13354,evm.model.scaffold465.17498,evm.model.scaffold564.18774,evm.model.scaffold564.18771,evm.model.scaffold375.15950,evm.model.scaffold778.20743,evm.model…
Biological process	phenol-containing compound metabolic process	GO:0018958	0.0583804	31	531	6.07515e-07	3.09727e-05	31	2.70089	evm.model.scaffold516.18218,evm.model.scaffold63.6075,evm.model.scaffold755.20553,evm.model.scaffold195.11633,evm.model.scaffold280.14000,evm.model.scaffold360.15477,evm.model.scaffold704.20212,evm.model.scaffold422.16882,evm.model.scaffold408.16694,evm.model.scaffold45.4062,evm.model.scaffold69.6292,evm.model.scaffold73.6573,evm.model.scaffold384.16141,evm.model.scaffold384.16139,evm.model.scaff…
Biological process	neuromuscular process	GO:0050905	0.0696798	37	531	6.33613e-07	3.21176e-05	37	2.43654	evm.model.scaffold117.8835,evm.model.scaffold11.1090,evm.model.scaffold755.20553,evm.model.scaffold21.2089,evm.model.scaffold182.11288,evm.model.scaffold243.13040,evm.model.scaffold538.18475,evm.model.scaffold1122.22625,evm.model.scaffold465.17515,evm.model.scaffold3.276,evm.model.scaffold666.19878,evm.model.scaffold943.21833,evm.model.scaffold20.2052,evm.model.scaffold8.878,evm.model.scaffold265…
Biological process	positive regulation of cell migration	GO:0030335	0.12806	68	531	6.72511e-07	3.38945e-05	68	1.84621	evm.model.scaffold17.1782,evm.model.scaffold429.16970,evm.model.scaffold524.18311,evm.model.scaffold127.9382,evm.model.scaffold360.15477,evm.model.scaffold118.8991,evm.model.scaffold127.9368,evm.model.scaffold39.3591,evm.model.scaffold27.2685,evm.model.scaffold166.10795,evm.model.scaffold69.6292,evm.model.scaffold101.8201,evm.model.scaffold50.4590,evm.model.scaffold50.4591,evm.model.scaffold546.1…
Biological process	neuron differentiation	GO:0030182	0.350282	186	531	7.07845e-07	3.54727e-05	186	1.3664	evm.model.scaffold233.12647,evm.model.scaffold77.6782,evm.model.scaffold117.8835,evm.model.scaffold298.14290,evm.model.scaffold120.9126,evm.model.scaffold17.1782,evm.model.scaffold926.21746,evm.model.scaffold69.6333,evm.model.scaffold516.18216,evm.model.scaffold69.6332,evm.model.scaffold564.18771,evm.model.scaffold375.15952,evm.model.scaffold35.3322,evm.model.scaffold117.8847,evm.model.scaffold11…
Biological process	negative regulation of cell population proliferation	GO:0008285	0.154426	82	531	7.44539e-07	3.71007e-05	82	1.72166	evm.model.scaffold1727.23994,evm.model.scaffold233.12647,evm.model.scaffold77.6782,evm.model.scaffold926.21746,evm.model.scaffold233.12648,evm.model.scaffold465.17498,evm.model.scaffold564.18771,evm.model.scaffold778.20743,evm.model.scaffold35.3322,evm.model.scaffold257.13419,evm.model.scaffold688.20066,evm.model.scaffold524.18311,evm.model.scaffold1204.22913,evm.model.scaffold367.15739,evm.model…
Biological process	regulation of nervous system process	GO:0031644	0.0602637	32	531	7.7955e-07	3.86271e-05	32	2.61999	evm.model.scaffold233.12647,evm.model.scaffold564.18771,evm.model.scaffold375.15950,evm.model.scaffold778.20743,evm.model.scaffold429.16970,evm.model.scaffold524.18311,evm.model.scaffold101.8201,evm.model.scaffold50.4590,evm.model.scaffold406.16626,evm.model.scaffold108.8545,evm.model.scaffold3.276,evm.model.scaffold311.14510,evm.model.scaffold391.16267,evm.model.scaffold351.15333,evm.model.scaff…
Biological process	regulation of vasculature development	GO:1901342	0.0847458	45	531	8.64901e-07	4.26169e-05	45	2.18044	evm.model.scaffold30.2966,evm.model.scaffold17.1782,evm.model.scaffold320.14682,evm.model.scaffold429.16970,evm.model.scaffold121.9181,evm.model.scaffold127.9382,evm.model.scaffold123.9227,evm.model.scaffold360.15477,evm.model.scaffold193.11588,evm.model.scaffold865.21421,evm.model.scaffold120.9152,evm.model.scaffold170.10903,evm.model.scaffold685.20043,evm.model.scaffold27.2685,evm.model.scaffol…
Biological process	cellular response to lipid	GO:0071396	0.150659	80	531	8.76356e-07	4.29414e-05	80	1.72916	evm.model.scaffold30.2966,evm.model.scaffold233.12647,evm.model.scaffold298.14290,evm.model.scaffold465.17498,evm.model.scaffold564.18771,evm.model.scaffold778.20743,evm.model.scaffold257.13419,evm.model.scaffold1018.22191,evm.model.scaffold574.18975,evm.model.scaffold524.18311,evm.model.scaffold1204.22913,evm.model.scaffold1141.22698,evm.model.scaffold444.17178,evm.model.scaffold367.15739,evm.mo…
Biological process	intracellular signal transduction	GO:0035556	0.382298	203	531	8.8957e-07	4.33481e-05	203	1.33441	evm.model.scaffold233.12647,evm.model.scaffold66.6167,evm.model.scaffold77.6782,evm.model.scaffold298.14290,evm.model.scaffold306.14449,evm.model.scaffold120.9126,evm.model.scaffold17.1782,evm.model.scaffold926.21746,evm.model.scaffold390.16245,evm.model.scaffold320.14682,evm.model.scaffold69.6333,evm.model.scaffold564.18774,evm.model.scaffold69.6332,evm.model.scaffold564.18771,evm.model.scaffold…
Biological process	tissue migration	GO:0090130	0.0922787	49	531	9.47853e-07	4.59344e-05	49	2.0899	evm.model.scaffold30.2966,evm.model.scaffold233.12647,evm.model.scaffold255.13354,evm.model.scaffold69.6332,evm.model.scaffold62.6004,evm.model.scaffold524.18311,evm.model.scaffold127.9382,evm.model.scaffold123.9227,evm.model.scaffold127.9368,evm.model.scaffold491.17924,evm.model.scaffold39.3591,evm.model.scaffold685.20043,evm.model.scaffold21.2089,evm.model.scaffold27.2685,evm.model.scaffold166.…
Biological process	secretion by cell	GO:0032940	0.256121	136	531	1.10276e-06	5.31493e-05	136	1.46763	evm.model.scaffold233.12647,evm.model.scaffold77.6782,evm.model.scaffold117.8835,evm.model.scaffold298.14290,evm.model.scaffold926.21746,evm.model.scaffold320.14682,evm.model.scaffold69.6333,evm.model.scaffold564.18774,evm.model.scaffold69.6332,evm.model.scaffold375.15950,evm.model.scaffold778.20743,evm.model.scaffold1229.23004,evm.model.scaffold375.15952,evm.model.scaffold1204.22913,evm.model.sc…
Biological process	stem cell differentiation	GO:0048863	0.0772128	41	531	1.12239e-06	5.38015e-05	41	2.25807	evm.model.scaffold1727.23994,evm.model.scaffold120.9126,evm.model.scaffold564.18771,evm.model.scaffold35.3322,evm.model.scaffold63.6075,evm.model.scaffold1204.22913,evm.model.scaffold118.8991,evm.model.scaffold59.5863,evm.model.scaffold685.20043,evm.model.scaffold10.1051,evm.model.scaffold166.10795,evm.model.scaffold101.8201,evm.model.scaffold50.4590,evm.model.scaffold45.4005,evm.model.scaffold14…
Biological process	regulation of synapse organization	GO:0050807	0.0828625	44	531	1.14287e-06	5.44873e-05	44	2.18096	evm.model.scaffold298.14290,evm.model.scaffold69.6333,evm.model.scaffold516.18216,evm.model.scaffold69.6332,evm.model.scaffold257.13419,evm.model.scaffold63.6075,evm.model.scaffold450.17285,evm.model.scaffold367.15739,evm.model.scaffold193.11588,evm.model.scaffold59.5863,evm.model.scaffold39.3591,evm.model.scaffold42.3806,evm.model.scaffold57.5666,evm.model.scaffold37.3511,evm.model.scaffold101.8…
Biological process	negative regulation of cell growth	GO:0030308	0.0659134	35	531	1.34318e-06	6.36928e-05	35	2.43143	evm.model.scaffold233.12647,evm.model.scaffold233.12648,evm.model.scaffold699.20193,evm.model.scaffold39.3589,evm.model.scaffold685.20043,evm.model.scaffold166.10795,evm.model.scaffold148.10294,evm.model.scaffold454.17353,evm.model.scaffold783.20810,evm.model.scaffold247.13101,evm.model.scaffold610.19371,evm.model.scaffold414.16778,evm.model.scaffold3.276,evm.model.scaffold450.17270,evm.model.sca…
Biological process	response to hormone	GO:0009725	0.227872	121	531	1.38175e-06	6.51711e-05	121	1.50807	evm.model.scaffold233.12647,evm.model.scaffold298.14290,evm.model.scaffold390.16245,evm.model.scaffold233.12648,evm.model.scaffold564.18771,evm.model.scaffold375.15950,evm.model.scaffold778.20743,evm.model.scaffold516.18218,evm.model.scaffold574.18975,evm.model.scaffold524.18311,evm.model.scaffold1204.22913,evm.model.scaffold1141.22698,evm.model.scaffold121.9181,evm.model.scaffold755.20553,evm.mo…
Biological process	melanin biosynthetic process	GO:0042438	0.0188324	10	531	1.41716e-06	6.64859e-05	10	6.92073	evm.model.scaffold280.14000,evm.model.scaffold360.15477,evm.model.scaffold704.20212,evm.model.scaffold45.4062,evm.model.scaffold165.10758,evm.model.scaffold934.21786,evm.model.scaffold292.14185,evm.model.scaffold708.20241,evm.model.scaffold531.18409,evm.model.scaffold1088.22456,
Biological process	glial cell differentiation	GO:0010001	0.0753296	40	531	1.42378e-06	6.64429e-05	40	2.26419	evm.model.scaffold233.12647,evm.model.scaffold17.1782,evm.model.scaffold320.14682,evm.model.scaffold63.6075,evm.model.scaffold118.8991,evm.model.scaffold422.16882,evm.model.scaffold39.3591,evm.model.scaffold120.9081,evm.model.scaffold406.16626,evm.model.scaffold75.6618,evm.model.scaffold311.14510,evm.model.scaffold391.16267,evm.model.scaffold571.18873,evm.model.scaffold351.15333,evm.model.scaffol…
Biological process	regulation of angiogenesis	GO:0045765	0.0828625	44	531	1.4665e-06	6.80766e-05	44	2.16053	evm.model.scaffold30.2966,evm.model.scaffold17.1782,evm.model.scaffold320.14682,evm.model.scaffold429.16970,evm.model.scaffold121.9181,evm.model.scaffold127.9382,evm.model.scaffold123.9227,evm.model.scaffold360.15477,evm.model.scaffold193.11588,evm.model.scaffold865.21421,evm.model.scaffold120.9152,evm.model.scaffold170.10903,evm.model.scaffold685.20043,evm.model.scaffold27.2685,evm.model.scaffol…
Biological process	sprouting angiogenesis	GO:0002040	0.0508475	27	531	1.49543e-06	6.9056e-05	27	2.81351	evm.model.scaffold30.2966,evm.model.scaffold306.14449,evm.model.scaffold255.13354,evm.model.scaffold320.14682,evm.model.scaffold429.16970,evm.model.scaffold62.6004,evm.model.scaffold121.9181,evm.model.scaffold127.9382,evm.model.scaffold123.9227,evm.model.scaffold39.3591,evm.model.scaffold685.20043,evm.model.scaffold21.2089,evm.model.scaffold27.2685,evm.model.scaffold45.4005,evm.model.scaffold412.…
Biological process	secondary palate development	GO:0062009	0.0169492	9	531	1.55489e-06	7.14279e-05	9	7.85997	evm.model.scaffold142.10011,evm.model.scaffold30.2989,evm.model.scaffold676.19971,evm.model.scaffold59.5863,evm.model.scaffold21.2089,evm.model.scaffold101.8201,evm.model.scaffold50.4590,evm.model.scaffold354.15371,evm.model.scaffold840.21251,
Biological process	cell activation	GO:0001775	0.239171	127	531	1.69877e-06	7.7633e-05	127	1.4826	evm.model.scaffold30.2966,evm.model.scaffold233.12647,evm.model.scaffold77.6782,evm.model.scaffold233.12648,evm.model.scaffold320.14682,evm.model.scaffold69.6333,evm.model.scaffold465.17498,evm.model.scaffold1229.23004,evm.model.scaffold375.15952,evm.model.scaffold117.8847,evm.model.scaffold257.13419,evm.model.scaffold1018.22191,evm.model.scaffold62.6004,evm.model.scaffold524.18311,evm.model.scaf…
Biological process	skeletal system morphogenesis	GO:0048705	0.0772128	41	531	1.76129e-06	8.00753e-05	41	2.2181	evm.model.scaffold233.12647,evm.model.scaffold564.18774,evm.model.scaffold564.18771,evm.model.scaffold11.1075,evm.model.scaffold142.10011,evm.model.scaffold30.2989,evm.model.scaffold429.16970,evm.model.scaffold62.6004,evm.model.scaffold193.11588,evm.model.scaffold160.10630,evm.model.scaffold699.20193,evm.model.scaffold685.20043,evm.model.scaffold57.5666,evm.model.scaffold101.8201,evm.model.scaffo…
Biological process	cardiocyte differentiation	GO:0035051	0.0602637	32	531	1.9067e-06	8.62415e-05	32	2.51339	evm.model.scaffold233.12647,evm.model.scaffold926.21746,evm.model.scaffold524.18311,evm.model.scaffold118.8991,evm.model.scaffold59.5863,evm.model.scaffold685.20043,evm.model.scaffold166.10795,evm.model.scaffold243.13040,evm.model.scaffold1122.22625,evm.model.scaffold465.17515,evm.model.scaffold610.19371,evm.model.scaffold313.14534,evm.model.scaffold311.14510,evm.model.scaffold1115.22607,evm.mode…
Biological process	signal release	GO:0023061	0.145009	77	531	1.98726e-06	8.94265e-05	77	1.71484	evm.model.scaffold233.12647,evm.model.scaffold77.6782,evm.model.scaffold298.14290,evm.model.scaffold69.6333,evm.model.scaffold564.18774,evm.model.scaffold69.6332,evm.model.scaffold778.20743,evm.model.scaffold1204.22913,evm.model.scaffold414.16785,evm.model.scaffold121.9181,evm.model.scaffold195.11633,evm.model.scaffold422.16882,evm.model.scaffold127.9368,evm.model.scaffold865.21421,evm.model.scaf…
Biological process	tube morphogenesis	GO:0035239	0.278719	148	531	2.05427e-06	9.1973e-05	148	1.42073	evm.model.scaffold30.2966,evm.model.scaffold233.12647,evm.model.scaffold306.14449,evm.model.scaffold120.9126,evm.model.scaffold17.1782,evm.model.scaffold390.16245,evm.model.scaffold255.13354,evm.model.scaffold320.14682,evm.model.scaffold564.18771,evm.model.scaffold35.3322,evm.model.scaffold117.8847,evm.model.scaffold11.1075,evm.model.scaffold257.13419,evm.model.scaffold688.20066,evm.model.scaffol…
Biological process	regulation of secretion	GO:0051046	0.163842	87	531	2.06477e-06	9.19762e-05	87	1.64662	evm.model.scaffold233.12647,evm.model.scaffold77.6782,evm.model.scaffold298.14290,evm.model.scaffold926.21746,evm.model.scaffold69.6333,evm.model.scaffold564.18774,evm.model.scaffold69.6332,evm.model.scaffold564.18771,evm.model.scaffold778.20743,evm.model.scaffold1204.22913,evm.model.scaffold481.17764,evm.model.scaffold121.9181,evm.model.scaffold195.11633,evm.model.scaffold89.7664,evm.model.scaff…
Biological process	regulation of postsynaptic membrane potential	GO:0060078	0.047081	25	531	2.10084e-06	9.31125e-05	25	2.90189	evm.model.scaffold778.20743,evm.model.scaffold375.15952,evm.model.scaffold429.16970,evm.model.scaffold524.18311,evm.model.scaffold89.7664,evm.model.scaffold285.14102,evm.model.scaffold888.21532,evm.model.scaffold71.6458,evm.model.scaffold101.8201,evm.model.scaffold705.20217,evm.model.scaffold50.4590,evm.model.scaffold18.1817,evm.model.scaffold6.819,evm.model.scaffold290.14174,evm.model.scaffold90…
Biological process	circulatory system process	GO:0003013	0.161959	86	531	2.35443e-06	0.00010383	86	1.64724	evm.model.scaffold30.2966,evm.model.scaffold233.12647,evm.model.scaffold117.8835,evm.model.scaffold17.1782,evm.model.scaffold926.21746,evm.model.scaffold69.6333,evm.model.scaffold564.18774,evm.model.scaffold69.6332,evm.model.scaffold564.18771,evm.model.scaffold516.18218,evm.model.scaffold524.18311,evm.model.scaffold457.17397,evm.model.scaffold121.9181,evm.model.scaffold755.20553,evm.model.scaffol…
Biological process	basement membrane organization	GO:0071711	0.0263653	14	531	2.44269e-06	0.000107187	14	4.54441	evm.model.scaffold63.6075,evm.model.scaffold57.5666,evm.model.scaffold69.6292,evm.model.scaffold798.20908,evm.model.scaffold571.18873,evm.model.scaffold321.14713,evm.model.scaffold298.14312,evm.model.scaffold340.15060,evm.model.scaffold340.15061,evm.model.scaffold41.3757,evm.model.scaffold234.12750,evm.model.scaffold198.11707,evm.model.scaffold617.19445,evm.model.scaffold30.2908,
Biological process	regulation of extent of cell growth	GO:0061387	0.0527307	28	531	2.45144e-06	0.000107038	28	2.68156	evm.model.scaffold69.6332,evm.model.scaffold491.17924,evm.model.scaffold148.10294,evm.model.scaffold247.13101,evm.model.scaffold3.276,evm.model.scaffold12.1152,evm.model.scaffold351.15333,evm.model.scaffold165.10758,evm.model.scaffold586.19075,evm.model.scaffold42.3889,evm.model.scaffold290.14172,evm.model.scaffold250.13244,evm.model.scaffold1222.22985,evm.model.scaffold101.8256,evm.model.scaffol…
Biological process	regulation of transmembrane receptor protein serine/threonine kinase signaling pathway	GO:0090092	0.0659134	35	531	2.63425e-06	0.000114454	35	2.35992	evm.model.scaffold233.12647,evm.model.scaffold469.17610,evm.model.scaffold201.11761,evm.model.scaffold688.20066,evm.model.scaffold117.8888,evm.model.scaffold59.5863,evm.model.scaffold685.20043,evm.model.scaffold459.17451,evm.model.scaffold166.10795,evm.model.scaffold338.15039,evm.model.scaffold413.16776,evm.model.scaffold14.1522,evm.model.scaffold414.16778,evm.model.scaffold86.7243,evm.model.scaf…
Biological process	phosphorylation	GO:0016310	0.276836	147	531	2.66694e-06	0.000115306	147	1.41669	evm.model.scaffold233.12647,evm.model.scaffold77.6782,evm.model.scaffold298.14290,evm.model.scaffold926.21746,evm.model.scaffold390.16245,evm.model.scaffold233.12648,evm.model.scaffold69.6333,evm.model.scaffold564.18774,evm.model.scaffold69.6332,evm.model.scaffold564.18771,evm.model.scaffold375.15950,evm.model.scaffold227.12504,evm.model.scaffold516.18218,evm.model.scaffold1018.22191,evm.model.sc…
Biological process	stem cell development	GO:0048864	0.039548	21	531	2.67529e-06	0.000115103	21	3.22292	evm.model.scaffold120.9126,evm.model.scaffold564.18771,evm.model.scaffold35.3322,evm.model.scaffold63.6075,evm.model.scaffold118.8991,evm.model.scaffold685.20043,evm.model.scaffold101.8201,evm.model.scaffold50.4590,evm.model.scaffold45.4005,evm.model.scaffold108.8545,evm.model.scaffold435.17065,evm.model.scaffold602.19247,evm.model.scaffold41.3754,evm.model.scaffold156.10549,evm.model.scaffold248…
Biological process	regulation of cellular process	GO:0050794	0.887006	471	531	2.71026e-06	0.000116041	471	1.08909	evm.model.scaffold1727.23994,evm.model.scaffold30.2966,evm.model.scaffold233.12647,evm.model.scaffold66.6167,evm.model.scaffold77.6782,evm.model.scaffold469.17610,evm.model.scaffold117.8835,evm.model.scaffold298.14290,evm.model.scaffold201.11761,evm.model.scaffold306.14449,evm.model.scaffold120.9126,evm.model.scaffold17.1782,evm.model.scaffold926.21746,evm.model.scaffold390.16245,evm.model.scaffo…
Biological process	defense response	GO:0006952	0.299435	159	531	2.7351e-06	0.000116539	159	1.38959	evm.model.scaffold30.2966,evm.model.scaffold233.12647,evm.model.scaffold77.6782,evm.model.scaffold469.17610,evm.model.scaffold298.14290,evm.model.scaffold306.14449,evm.model.scaffold17.1782,evm.model.scaffold233.12648,evm.model.scaffold465.17498,evm.model.scaffold564.18771,evm.model.scaffold375.15950,evm.model.scaffold778.20743,evm.model.scaffold375.15952,evm.model.scaffold257.13419,evm.model.sca…
Biological process	leukocyte activation	GO:0045321	0.214689	114	531	2.74728e-06	0.000116495	114	1.51175	evm.model.scaffold233.12647,evm.model.scaffold77.6782,evm.model.scaffold233.12648,evm.model.scaffold320.14682,evm.model.scaffold69.6333,evm.model.scaffold465.17498,evm.model.scaffold1229.23004,evm.model.scaffold375.15952,evm.model.scaffold117.8847,evm.model.scaffold257.13419,evm.model.scaffold1018.22191,evm.model.scaffold62.6004,evm.model.scaffold524.18311,evm.model.scaffold450.17285,evm.model.sc…
Biological process	visual system development	GO:0150063	0.12806	68	531	2.79051e-06	0.000117762	68	1.77273	evm.model.scaffold30.2966,evm.model.scaffold233.12647,evm.model.scaffold375.15952,evm.model.scaffold142.10011,evm.model.scaffold30.2989,evm.model.scaffold177.11091,evm.model.scaffold63.6075,evm.model.scaffold83.7126,evm.model.scaffold450.17285,evm.model.scaffold444.17178,evm.model.scaffold426.16937,evm.model.scaffold121.9181,evm.model.scaffold755.20553,evm.model.scaffold121.9179,evm.model.scaffol…
Biological process	positive regulation of vascular endothelial growth factor production	GO:0010575	0.0207156	11	531	2.81732e-06	0.000118327	11	5.76398	evm.model.scaffold120.9152,evm.model.scaffold27.2685,evm.model.scaffold156.10553,evm.model.scaffold593.19156,evm.model.scaffold466.17565,evm.model.scaffold162.10694,evm.model.scaffold191.11537,evm.model.scaffold191.11538,evm.model.scaffold695.20137,evm.model.scaffold274.13767,evm.model.scaffold28.2738,
Biological process	osteoblast differentiation	GO:0001649	0.0659134	35	531	2.85902e-06	0.00011951	35	2.35127	evm.model.scaffold233.12647,evm.model.scaffold257.13419,evm.model.scaffold142.10011,evm.model.scaffold30.2989,evm.model.scaffold367.15739,evm.model.scaffold360.15477,evm.model.scaffold59.5863,evm.model.scaffold685.20043,evm.model.scaffold57.5666,evm.model.scaffold69.6292,evm.model.scaffold413.16776,evm.model.scaffold101.8201,evm.model.scaffold610.19371,evm.model.scaffold414.16778,evm.model.scaffo…
Biological process	positive regulation of nervous system development	GO:0051962	0.0847458	45	531	2.89219e-06	0.000120326	45	2.08408	evm.model.scaffold233.12647,evm.model.scaffold298.14290,evm.model.scaffold17.1782,evm.model.scaffold516.18216,evm.model.scaffold69.6332,evm.model.scaffold375.15950,evm.model.scaffold778.20743,evm.model.scaffold121.9181,evm.model.scaffold193.11588,evm.model.scaffold491.17924,evm.model.scaffold508.18123,evm.model.scaffold37.3511,evm.model.scaffold101.8201,evm.model.scaffold50.4590,evm.model.scaffol…
Biological process	negative regulation of cell projection organization	GO:0031345	0.0677966	36	531	3.00517e-06	0.000124439	36	2.31256	evm.model.scaffold233.12647,evm.model.scaffold298.14290,evm.model.scaffold117.8847,evm.model.scaffold257.13419,evm.model.scaffold367.15739,evm.model.scaffold57.5666,evm.model.scaffold148.10294,evm.model.scaffold247.13101,evm.model.scaffold3.276,evm.model.scaffold450.17270,evm.model.scaffold351.15333,evm.model.scaffold138.9856,evm.model.scaffold6.818,evm.model.scaffold165.10758,evm.model.scaffold2…
Biological process	response to stress	GO:0006950	0.546139	290	531	3.24897e-06	0.000133906	290	1.21665	evm.model.scaffold30.2966,evm.model.scaffold233.12647,evm.model.scaffold77.6782,evm.model.scaffold469.17610,evm.model.scaffold117.8835,evm.model.scaffold298.14290,evm.model.scaffold306.14449,evm.model.scaffold17.1782,evm.model.scaffold926.21746,evm.model.scaffold390.16245,evm.model.scaffold233.12648,evm.model.scaffold255.13354,evm.model.scaffold465.17498,evm.model.scaffold564.18774,evm.model.scaf…
Biological process	negative regulation of neuron projection development	GO:0010977	0.0583804	31	531	3.2495e-06	0.000133305	31	2.49359	evm.model.scaffold233.12647,evm.model.scaffold298.14290,evm.model.scaffold117.8847,evm.model.scaffold57.5666,evm.model.scaffold148.10294,evm.model.scaffold247.13101,evm.model.scaffold3.276,evm.model.scaffold450.17270,evm.model.scaffold351.15333,evm.model.scaffold138.9856,evm.model.scaffold6.818,evm.model.scaffold290.14172,evm.model.scaffold250.13244,evm.model.scaffold54.5530,evm.model.scaffold638…
Biological process	multicellular organismal homeostasis	GO:0048871	0.12806	68	531	3.30608e-06	0.000134998	68	1.76395	evm.model.scaffold233.12647,evm.model.scaffold77.6782,evm.model.scaffold17.1782,evm.model.scaffold465.17498,evm.model.scaffold564.18771,evm.model.scaffold375.15950,evm.model.scaffold142.10011,evm.model.scaffold30.2989,evm.model.scaffold429.16970,evm.model.scaffold63.6075,evm.model.scaffold524.18311,evm.model.scaffold29.2803,evm.model.scaffold117.8888,evm.model.scaffold127.9368,evm.model.scaffold8…
Biological process	regulation of MAPK cascade	GO:0043408	0.13936	74	531	3.40239e-06	0.000138291	74	1.7125	evm.model.scaffold233.12647,evm.model.scaffold77.6782,evm.model.scaffold778.20743,evm.model.scaffold117.8847,evm.model.scaffold195.11636,evm.model.scaffold113.8721,evm.model.scaffold195.11633,evm.model.scaffold89.7664,evm.model.scaffold360.15477,evm.model.scaffold422.16882,evm.model.scaffold127.9368,evm.model.scaffold865.21421,evm.model.scaffold120.9152,evm.model.scaffold59.5863,evm.model.scaffol…
Biological process	developmental pigmentation	GO:0048066	0.0376648	20	531	3.61476e-06	0.000146249	20	3.27499	evm.model.scaffold30.2966,evm.model.scaffold233.12648,evm.model.scaffold564.18771,evm.model.scaffold35.3322,evm.model.scaffold450.17285,evm.model.scaffold704.20212,evm.model.scaffold384.16141,evm.model.scaffold384.16138,evm.model.scaffold108.8545,evm.model.scaffold1358.23380,evm.model.scaffold602.19247,evm.model.scaffold934.21786,evm.model.scaffold292.14185,evm.model.scaffold708.20241,evm.model.s…
Biological process	muscle organ development	GO:0007517	0.101695	54	531	3.72908e-06	0.000150185	54	1.91373	evm.model.scaffold201.11760,evm.model.scaffold926.21746,evm.model.scaffold257.13419,evm.model.scaffold142.10011,evm.model.scaffold30.2989,evm.model.scaffold429.16970,evm.model.scaffold63.6075,evm.model.scaffold83.7126,evm.model.scaffold450.17285,evm.model.scaffold367.15739,evm.model.scaffold491.17924,evm.model.scaffold408.16694,evm.model.scaffold59.5863,evm.model.scaffold459.17451,evm.model.scaff…
Biological process	regulation of cell-substrate adhesion	GO:0010810	0.0696798	37	531	3.78847e-06	0.000151883	37	2.25816	evm.model.scaffold69.6332,evm.model.scaffold524.18311,evm.model.scaffold195.11633,evm.model.scaffold123.9227,evm.model.scaffold422.16882,evm.model.scaffold491.17924,evm.model.scaffold59.5863,evm.model.scaffold39.3591,evm.model.scaffold685.20043,evm.model.scaffold394.16320,evm.model.scaffold57.5666,evm.model.scaffold69.6292,evm.model.scaffold50.4591,evm.model.scaffold610.19365,evm.model.scaffold57…
Biological process	tissue development	GO:0009888	0.414313	220	531	3.90422e-06	0.000155816	220	1.28578	evm.model.scaffold1727.23994,evm.model.scaffold30.2966,evm.model.scaffold233.12647,evm.model.scaffold469.17610,evm.model.scaffold298.14290,evm.model.scaffold201.11760,evm.model.scaffold120.9126,evm.model.scaffold17.1782,evm.model.scaffold926.21746,evm.model.scaffold233.12648,evm.model.scaffold255.13354,evm.model.scaffold465.17498,evm.model.scaffold564.18774,evm.model.scaffold69.6332,evm.model.sca…
Biological process	eye development	GO:0001654	0.126177	67	531	4.01172e-06	0.000159385	67	1.76295	evm.model.scaffold30.2966,evm.model.scaffold233.12647,evm.model.scaffold375.15952,evm.model.scaffold142.10011,evm.model.scaffold30.2989,evm.model.scaffold177.11091,evm.model.scaffold63.6075,evm.model.scaffold83.7126,evm.model.scaffold450.17285,evm.model.scaffold444.17178,evm.model.scaffold426.16937,evm.model.scaffold121.9181,evm.model.scaffold755.20553,evm.model.scaffold121.9179,evm.model.scaffol…
Biological process	regulation of apoptotic process	GO:0042981	0.26177	139	531	4.0148e-06	0.000158791	139	1.42575	evm.model.scaffold30.2966,evm.model.scaffold77.6782,evm.model.scaffold298.14290,evm.model.scaffold120.9126,evm.model.scaffold465.17498,evm.model.scaffold564.18771,evm.model.scaffold117.8847,evm.model.scaffold227.12504,evm.model.scaffold257.13419,evm.model.scaffold1018.22191,evm.model.scaffold83.7126,evm.model.scaffold1141.22698,evm.model.scaffold450.17285,evm.model.scaffold444.17178,evm.model.sca…
Biological process	positive regulation of molecular function	GO:0044093	0.252354	134	531	4.11861e-06	0.00016217	134	1.438	evm.model.scaffold233.12647,evm.model.scaffold66.6167,evm.model.scaffold298.14290,evm.model.scaffold120.9126,evm.model.scaffold390.16245,evm.model.scaffold465.17498,evm.model.scaffold227.12504,evm.model.scaffold516.18218,evm.model.scaffold429.16970,evm.model.scaffold63.6075,evm.model.scaffold668.19893,evm.model.scaffold11.1090,evm.model.scaffold1204.22913,evm.model.scaffold1141.22698,evm.model.sc…
Biological process	hair follicle development	GO:0001942	0.0338983	18	531	4.15723e-06	0.000162963	18	3.5119	evm.model.scaffold63.6075,evm.model.scaffold117.8888,evm.model.scaffold57.5666,evm.model.scaffold166.10795,evm.model.scaffold373.15916,evm.model.scaffold1608.23837,evm.model.scaffold564.18750,evm.model.scaffold593.19156,evm.model.scaffold162.10694,evm.model.scaffold531.18409,evm.model.scaffold191.11537,evm.model.scaffold191.11538,evm.model.scaffold252.13298,evm.model.scaffold71.6509,evm.model.sca…
Biological process	regulation of wound healing	GO:0061041	0.0564972	30	531	4.22087e-06	0.000164726	30	2.5066	evm.model.scaffold30.2966,evm.model.scaffold17.1782,evm.model.scaffold390.16245,evm.model.scaffold450.17285,evm.model.scaffold121.9181,evm.model.scaffold422.16882,evm.model.scaffold117.8888,evm.model.scaffold1653.23894,evm.model.scaffold69.6292,evm.model.scaffold384.16141,evm.model.scaffold1432.23534,evm.model.scaffold45.4005,evm.model.scaffold384.16138,evm.model.scaffold321.14713,evm.model.scaff…
Biological process	supramolecular fiber organization	GO:0097435	0.160075	85	531	4.49565e-06	0.000174677	85	1.62639	evm.model.scaffold233.12647,evm.model.scaffold926.21746,evm.model.scaffold390.16245,evm.model.scaffold255.13354,evm.model.scaffold69.6333,evm.model.scaffold69.6332,evm.model.scaffold375.15950,evm.model.scaffold142.10011,evm.model.scaffold30.2989,evm.model.scaffold429.16970,evm.model.scaffold177.11091,evm.model.scaffold676.19971,evm.model.scaffold62.6004,evm.model.scaffold524.18311,evm.model.scaff…
Biological process	cellular response to growth factor stimulus	GO:0071363	0.156309	83	531	4.65911e-06	0.000180234	83	1.63679	evm.model.scaffold30.2966,evm.model.scaffold233.12647,evm.model.scaffold469.17610,evm.model.scaffold201.11761,evm.model.scaffold233.12648,evm.model.scaffold564.18774,evm.model.scaffold35.3322,evm.model.scaffold688.20066,evm.model.scaffold127.9382,evm.model.scaffold117.8888,evm.model.scaffold127.9368,evm.model.scaffold1430.23528,evm.model.scaffold699.20193,evm.model.scaffold59.5863,evm.model.scaff…
Biological process	hormone secretion	GO:0046879	0.0998117	53	531	4.76742e-06	0.000183618	53	1.91154	evm.model.scaffold233.12647,evm.model.scaffold77.6782,evm.model.scaffold298.14290,evm.model.scaffold564.18774,evm.model.scaffold778.20743,evm.model.scaffold1204.22913,evm.model.scaffold121.9181,evm.model.scaffold195.11633,evm.model.scaffold422.16882,evm.model.scaffold127.9368,evm.model.scaffold865.21421,evm.model.scaffold82.7109,evm.model.scaffold182.11288,evm.model.scaffold57.5666,evm.model.scaf…
Biological process	cellular response to oxygen-containing compound	GO:1901701	0.252354	134	531	4.80627e-06	0.00018431	134	1.43381	evm.model.scaffold30.2966,evm.model.scaffold233.12647,evm.model.scaffold298.14290,evm.model.scaffold233.12648,evm.model.scaffold69.6333,evm.model.scaffold465.17498,evm.model.scaffold564.18774,evm.model.scaffold69.6332,evm.model.scaffold564.18771,evm.model.scaffold375.15950,evm.model.scaffold778.20743,evm.model.scaffold257.13419,evm.model.scaffold1018.22191,evm.model.scaffold574.18975,evm.model.sc…
Biological process	behavior	GO:0007610	0.193974	103	531	4.87528e-06	0.000186147	103	1.53516	evm.model.scaffold1727.23994,evm.model.scaffold117.8835,evm.model.scaffold298.14290,evm.model.scaffold69.6333,evm.model.scaffold69.6332,evm.model.scaffold564.18771,evm.model.scaffold778.20743,evm.model.scaffold35.3322,evm.model.scaffold117.8847,evm.model.scaffold227.12504,evm.model.scaffold257.13419,evm.model.scaffold177.11091,evm.model.scaffold668.19893,evm.model.scaffold83.7126,evm.model.scaffo…
Biological process	regulation of vascular endothelial growth factor production	GO:0010574	0.0225989	12	531	5.24543e-06	0.000199417	12	4.9456	evm.model.scaffold120.9152,evm.model.scaffold27.2685,evm.model.scaffold406.16625,evm.model.scaffold156.10553,evm.model.scaffold593.19156,evm.model.scaffold466.17565,evm.model.scaffold162.10694,evm.model.scaffold191.11537,evm.model.scaffold191.11538,evm.model.scaffold695.20137,evm.model.scaffold274.13767,evm.model.scaffold28.2738,
Biological process	regulation of morphogenesis of an epithelium	GO:1905330	0.0301318	16	531	5.40042e-06	0.000204428	16	3.78631	evm.model.scaffold30.2966,evm.model.scaffold120.9126,evm.model.scaffold1141.22698,evm.model.scaffold127.9368,evm.model.scaffold408.16694,evm.model.scaffold685.20043,evm.model.scaffold538.18475,evm.model.scaffold108.8545,evm.model.scaffold435.17065,evm.model.scaffold373.15916,evm.model.scaffold1608.23837,evm.model.scaffold466.17527,evm.model.scaffold71.6509,evm.model.scaffold79.6968,evm.model.scaf…
Biological process	animal organ morphogenesis	GO:0009887	0.297552	158	531	5.47062e-06	0.0002062	158	1.3756	evm.model.scaffold30.2966,evm.model.scaffold233.12647,evm.model.scaffold120.9126,evm.model.scaffold926.21746,evm.model.scaffold320.14682,evm.model.scaffold564.18774,evm.model.scaffold564.18771,evm.model.scaffold375.15952,evm.model.scaffold810.21038,evm.model.scaffold35.3322,evm.model.scaffold11.1075,evm.model.scaffold257.13419,evm.model.scaffold688.20066,evm.model.scaffold142.10011,evm.model.scaf…
Biological process	axon extension	GO:0048675	0.0546139	29	531	5.47583e-06	0.000205518	29	2.52065	evm.model.scaffold69.6332,evm.model.scaffold491.17924,evm.model.scaffold148.10294,evm.model.scaffold247.13101,evm.model.scaffold3.276,evm.model.scaffold12.1152,evm.model.scaffold261.13531,evm.model.scaffold351.15333,evm.model.scaffold165.10758,evm.model.scaffold586.19075,evm.model.scaffold42.3889,evm.model.scaffold41.3757,evm.model.scaffold1222.22985,evm.model.scaffold54.5530,evm.model.scaffold63…
Biological process	regulation of membrane potential	GO:0042391	0.103578	55	531	5.66937e-06	0.000211881	55	1.87316	evm.model.scaffold117.8835,evm.model.scaffold778.20743,evm.model.scaffold375.15952,evm.model.scaffold429.16970,evm.model.scaffold524.18311,evm.model.scaffold89.7664,evm.model.scaffold491.17924,evm.model.scaffold170.10903,evm.model.scaffold285.14102,evm.model.scaffold578.19012,evm.model.scaffold888.21532,evm.model.scaffold71.6458,evm.model.scaffold243.13040,evm.model.scaffold101.8201,evm.model.sca…
Biological process	hair cycle process	GO:0022405	0.0338983	18	531	6.01484e-06	0.000223844	18	3.42092	evm.model.scaffold63.6075,evm.model.scaffold117.8888,evm.model.scaffold57.5666,evm.model.scaffold166.10795,evm.model.scaffold373.15916,evm.model.scaffold1608.23837,evm.model.scaffold564.18750,evm.model.scaffold593.19156,evm.model.scaffold162.10694,evm.model.scaffold531.18409,evm.model.scaffold191.11537,evm.model.scaffold191.11538,evm.model.scaffold252.13298,evm.model.scaffold71.6509,evm.model.sca…
Biological process	regulation of anatomical structure morphogenesis	GO:0022603	0.271186	144	531	6.1958e-06	0.000229609	144	1.40252	evm.model.scaffold30.2966,evm.model.scaffold233.12647,evm.model.scaffold298.14290,evm.model.scaffold120.9126,evm.model.scaffold17.1782,evm.model.scaffold320.14682,evm.model.scaffold69.6332,evm.model.scaffold35.3322,evm.model.scaffold117.8847,evm.model.scaffold257.13419,evm.model.scaffold429.16970,evm.model.scaffold11.1090,evm.model.scaffold524.18311,evm.model.scaffold1141.22698,evm.model.scaffold…
Biological process	peptide transport	GO:0015833	0.0922787	49	531	6.19857e-06	0.00022875	49	1.9536	evm.model.scaffold233.12647,evm.model.scaffold77.6782,evm.model.scaffold298.14290,evm.model.scaffold564.18774,evm.model.scaffold516.18218,evm.model.scaffold1204.22913,evm.model.scaffold121.9181,evm.model.scaffold195.11633,evm.model.scaffold422.16882,evm.model.scaffold865.21421,evm.model.scaffold82.7109,evm.model.scaffold39.3591,evm.model.scaffold182.11288,evm.model.scaffold57.5666,evm.model.scaff…
Biological process	positive regulation of macromolecule metabolic process	GO:0010604	0.429379	228	531	6.28307e-06	0.000230903	228	1.26847	evm.model.scaffold1727.23994,evm.model.scaffold233.12647,evm.model.scaffold298.14290,evm.model.scaffold120.9126,evm.model.scaffold926.21746,evm.model.scaffold390.16245,evm.model.scaffold69.6333,evm.model.scaffold465.17498,evm.model.scaffold69.6332,evm.model.scaffold564.18771,evm.model.scaffold375.15950,evm.model.scaffold35.3322,evm.model.scaffold11.1075,evm.model.scaffold227.12504,evm.model.scaff…
Biological process	cellular response to hormone stimulus	GO:0032870	0.154426	82	531	6.37852e-06	0.000233438	82	1.62933	evm.model.scaffold298.14290,evm.model.scaffold233.12648,evm.model.scaffold375.15950,evm.model.scaffold574.18975,evm.model.scaffold524.18311,evm.model.scaffold1204.22913,evm.model.scaffold1141.22698,evm.model.scaffold121.9181,evm.model.scaffold755.20553,evm.model.scaffold113.8721,evm.model.scaffold123.9227,evm.model.scaffold1015.22174,evm.model.scaffold422.16882,evm.model.scaffold1579.23795,evm.mo…
Biological process	skin epidermis development	GO:0098773	0.0338983	18	531	6.46561e-06	0.000235648	18	3.40328	evm.model.scaffold63.6075,evm.model.scaffold117.8888,evm.model.scaffold57.5666,evm.model.scaffold166.10795,evm.model.scaffold373.15916,evm.model.scaffold1608.23837,evm.model.scaffold564.18750,evm.model.scaffold593.19156,evm.model.scaffold162.10694,evm.model.scaffold531.18409,evm.model.scaffold191.11537,evm.model.scaffold191.11538,evm.model.scaffold252.13298,evm.model.scaffold71.6509,evm.model.sca…
Biological process	apoptotic process	GO:0006915	0.306968	163	531	6.5119e-06	0.000236358	163	1.36192	evm.model.scaffold30.2966,evm.model.scaffold77.6782,evm.model.scaffold298.14290,evm.model.scaffold201.11761,evm.model.scaffold120.9126,evm.model.scaffold17.1782,evm.model.scaffold465.17498,evm.model.scaffold564.18771,evm.model.scaffold375.15950,evm.model.scaffold117.8847,evm.model.scaffold227.12504,evm.model.scaffold257.13419,evm.model.scaffold1018.22191,evm.model.scaffold83.7126,evm.model.scaffo…
Biological process	presynapse assembly	GO:0099054	0.0282486	15	531	6.70266e-06	0.000242285	15	3.92998	evm.model.scaffold450.17285,evm.model.scaffold59.5863,evm.model.scaffold57.5666,evm.model.scaffold101.8201,evm.model.scaffold50.4590,evm.model.scaffold1222.22985,evm.model.scaffold901.21605,evm.model.scaffold804.20949,evm.model.scaffold294.14213,evm.model.scaffold41.3742,evm.model.scaffold181.11247,evm.model.scaffold227.12492,evm.model.scaffold260.13495,evm.model.scaffold354.15371,evm.model.scaff…
Biological process	regulation of anatomical structure size	GO:0090066	0.13371	71	531	6.79023e-06	0.000244448	71	1.70214	evm.model.scaffold69.6333,evm.model.scaffold564.18774,evm.model.scaffold69.6332,evm.model.scaffold564.18771,evm.model.scaffold177.11091,evm.model.scaffold524.18311,evm.model.scaffold121.9181,evm.model.scaffold755.20553,evm.model.scaffold123.9227,evm.model.scaffold422.16882,evm.model.scaffold491.17924,evm.model.scaffold298.14273,evm.model.scaffold792.20877,evm.model.scaffold243.13040,evm.model.sca…
Biological process	regulation of cell growth	GO:0001558	0.112994	60	531	6.86381e-06	0.000246093	60	1.80245	evm.model.scaffold233.12647,evm.model.scaffold17.1782,evm.model.scaffold233.12648,evm.model.scaffold69.6332,evm.model.scaffold121.9181,evm.model.scaffold491.17924,evm.model.scaffold699.20193,evm.model.scaffold39.3589,evm.model.scaffold82.7109,evm.model.scaffold298.14273,evm.model.scaffold685.20043,evm.model.scaffold166.10795,evm.model.scaffold148.10294,evm.model.scaffold14.1522,evm.model.scaffold…
Biological process	vascular endothelial growth factor production	GO:0010573	0.0244821	13	531	6.93407e-06	0.000247605	13	4.45643	evm.model.scaffold120.9152,evm.model.scaffold27.2685,evm.model.scaffold406.16625,evm.model.scaffold156.10553,evm.model.scaffold593.19156,evm.model.scaffold466.17565,evm.model.scaffold162.10694,evm.model.scaffold191.11537,evm.model.scaffold191.11538,evm.model.scaffold695.20137,evm.model.scaffold274.13767,evm.model.scaffold28.2738,evm.model.scaffold541.18503,
Biological process	neuron development	GO:0048666	0.314501	167	531	7.04315e-06	0.000250486	167	1.35281	evm.model.scaffold233.12647,evm.model.scaffold77.6782,evm.model.scaffold117.8835,evm.model.scaffold298.14290,evm.model.scaffold120.9126,evm.model.scaffold17.1782,evm.model.scaffold926.21746,evm.model.scaffold69.6333,evm.model.scaffold516.18216,evm.model.scaffold69.6332,evm.model.scaffold564.18771,evm.model.scaffold375.15952,evm.model.scaffold117.8847,evm.model.scaffold257.13419,evm.model.scaffold…
Biological process	regulation of muscle system process	GO:0090257	0.0828625	44	531	8.00334e-06	0.000283492	44	2.02245	evm.model.scaffold1727.23994,evm.model.scaffold233.12647,evm.model.scaffold201.11760,evm.model.scaffold926.21746,evm.model.scaffold257.13419,evm.model.scaffold11.1090,evm.model.scaffold367.15739,evm.model.scaffold755.20553,evm.model.scaffold491.17924,evm.model.scaffold182.11288,evm.model.scaffold243.13040,evm.model.scaffold26.2622,evm.model.scaffold465.17515,evm.model.scaffold313.14534,evm.model.…
Biological process	postsynapse organization	GO:0099173	0.0640301	34	531	8.29781e-06	0.000292747	34	2.27161	evm.model.scaffold298.14290,evm.model.scaffold69.6333,evm.model.scaffold69.6332,evm.model.scaffold117.8847,evm.model.scaffold668.19893,evm.model.scaffold39.3591,evm.model.scaffold42.3806,evm.model.scaffold57.5666,evm.model.scaffold101.8201,evm.model.scaffold705.20217,evm.model.scaffold50.4590,evm.model.scaffold802.20920,evm.model.scaffold406.16625,evm.model.scaffold12.1294,evm.model.scaffold610.1…
Biological process	regulation of catalytic activity	GO:0050790	0.284369	151	531	8.43581e-06	0.000296429	151	1.37949	evm.model.scaffold1727.23994,evm.model.scaffold233.12647,evm.model.scaffold66.6167,evm.model.scaffold298.14290,evm.model.scaffold120.9126,evm.model.scaffold926.21746,evm.model.scaffold390.16245,evm.model.scaffold564.18771,evm.model.scaffold227.12504,evm.model.scaffold1018.22191,evm.model.scaffold429.16970,evm.model.scaffold63.6075,evm.model.scaffold668.19893,evm.model.scaffold11.1090,evm.model.sc…
Biological process	response to chemical	GO:0042221	0.642185	341	531	8.51428e-06	0.000298	341	1.16667	evm.model.scaffold1727.23994,evm.model.scaffold30.2966,evm.model.scaffold233.12647,evm.model.scaffold469.17610,evm.model.scaffold117.8835,evm.model.scaffold298.14290,evm.model.scaffold201.11761,evm.model.scaffold306.14449,evm.model.scaffold120.9126,evm.model.scaffold17.1782,evm.model.scaffold926.21746,evm.model.scaffold390.16245,evm.model.scaffold233.12648,evm.model.scaffold255.13354,evm.model.sc…
Biological process	response to oxygen-containing compound	GO:1901700	0.340866	181	531	8.79125e-06	0.000306478	181	1.32463	evm.model.scaffold30.2966,evm.model.scaffold233.12647,evm.model.scaffold117.8835,evm.model.scaffold298.14290,evm.model.scaffold233.12648,evm.model.scaffold69.6333,evm.model.scaffold465.17498,evm.model.scaffold564.18774,evm.model.scaffold69.6332,evm.model.scaffold564.18771,evm.model.scaffold375.15950,evm.model.scaffold778.20743,evm.model.scaffold257.13419,evm.model.scaffold516.18218,evm.model.scaf…
Biological process	regulation of cell death	GO:0010941	0.295669	157	531	8.97666e-06	0.000311709	157	1.36592	evm.model.scaffold30.2966,evm.model.scaffold233.12647,evm.model.scaffold77.6782,evm.model.scaffold298.14290,evm.model.scaffold120.9126,evm.model.scaffold17.1782,evm.model.scaffold465.17498,evm.model.scaffold516.18216,evm.model.scaffold564.18771,evm.model.scaffold117.8847,evm.model.scaffold227.12504,evm.model.scaffold257.13419,evm.model.scaffold1018.22191,evm.model.scaffold83.7126,evm.model.scaffo…
Biological process	sensory organ morphogenesis	GO:0090596	0.0979284	52	531	9.22958e-06	0.000319235	52	1.88102	evm.model.scaffold320.14682,evm.model.scaffold375.15952,evm.model.scaffold142.10011,evm.model.scaffold30.2989,evm.model.scaffold426.16937,evm.model.scaffold121.9181,evm.model.scaffold755.20553,evm.model.scaffold121.9179,evm.model.scaffold118.8991,evm.model.scaffold127.9368,evm.model.scaffold865.21421,evm.model.scaffold699.20193,evm.model.scaffold59.5863,evm.model.scaffold170.10903,evm.model.scaff…
Biological process	response to abiotic stimulus	GO:0009628	0.284369	151	531	9.69635e-06	0.000334069	151	1.37606	evm.model.scaffold233.12647,evm.model.scaffold77.6782,evm.model.scaffold117.8835,evm.model.scaffold298.14290,evm.model.scaffold17.1782,evm.model.scaffold926.21746,evm.model.scaffold233.12648,evm.model.scaffold255.13354,evm.model.scaffold375.15950,evm.model.scaffold778.20743,evm.model.scaffold375.15952,evm.model.scaffold117.8847,evm.model.scaffold227.12504,evm.model.scaffold257.13419,evm.model.sca…
Biological process	gliogenesis	GO:0042063	0.094162	50	531	9.93249e-06	0.000340874	50	1.90446	evm.model.scaffold233.12647,evm.model.scaffold17.1782,evm.model.scaffold320.14682,evm.model.scaffold375.15950,evm.model.scaffold63.6075,evm.model.scaffold118.8991,evm.model.scaffold422.16882,evm.model.scaffold508.18123,evm.model.scaffold39.3591,evm.model.scaffold166.10795,evm.model.scaffold120.9081,evm.model.scaffold406.16626,evm.model.scaffold546.18581,evm.model.scaffold610.19365,evm.model.scaff…
Biological process	soft palate development	GO:0060023	0.0094162	5	531	9.989e-06	0.000341484	5	15.2833	evm.model.scaffold142.10011,evm.model.scaffold30.2989,evm.model.scaffold676.19971,evm.model.scaffold21.2089,evm.model.scaffold840.21251,
Biological process	amide transport	GO:0042886	0.0960452	51	531	9.99039e-06	0.000340213	51	1.88957	evm.model.scaffold233.12647,evm.model.scaffold77.6782,evm.model.scaffold298.14290,evm.model.scaffold564.18774,evm.model.scaffold516.18218,evm.model.scaffold1204.22913,evm.model.scaffold121.9181,evm.model.scaffold195.11633,evm.model.scaffold422.16882,evm.model.scaffold978.22000,evm.model.scaffold865.21421,evm.model.scaffold82.7109,evm.model.scaffold39.3591,evm.model.scaffold182.11288,evm.model.sca…
Biological process	central nervous system neuron differentiation	GO:0021953	0.0602637	32	531	1.00579e-05	0.000341196	32	2.31967	evm.model.scaffold69.6333,evm.model.scaffold69.6332,evm.model.scaffold755.20553,evm.model.scaffold195.11633,evm.model.scaffold422.16882,evm.model.scaffold101.8201,evm.model.scaffold50.4590,evm.model.scaffold247.13101,evm.model.scaffold75.6618,evm.model.scaffold261.13531,evm.model.scaffold138.9856,evm.model.scaffold265.13610,evm.model.scaffold602.19247,evm.model.scaffold168.10834,evm.model.scaffol…
Biological process	cation transport	GO:0006812	0.190207	101	531	1.02435e-05	0.000346161	101	1.51706	evm.model.scaffold233.12647,evm.model.scaffold117.8835,evm.model.scaffold120.9126,evm.model.scaffold17.1782,evm.model.scaffold69.6333,evm.model.scaffold564.18774,evm.model.scaffold69.6332,evm.model.scaffold375.15950,evm.model.scaffold778.20743,evm.model.scaffold257.13419,evm.model.scaffold11.1090,evm.model.scaffold481.17764,evm.model.scaffold457.17397,evm.model.scaffold367.15739,evm.model.scaffol…
Biological process	vascular wound healing	GO:0061042	0.0150659	8	531	1.03207e-05	0.000347438	8	7.33597	evm.model.scaffold17.1782,evm.model.scaffold121.9181,evm.model.scaffold69.6292,evm.model.scaffold45.4005,evm.model.scaffold593.19156,evm.model.scaffold162.10694,evm.model.scaffold191.11537,evm.model.scaffold191.11538,
Biological process	regulation of cell junction assembly	GO:1901888	0.0677966	36	531	1.08531e-05	0.000363971	36	2.1826	evm.model.scaffold69.6333,evm.model.scaffold516.18216,evm.model.scaffold69.6332,evm.model.scaffold63.6075,evm.model.scaffold450.17285,evm.model.scaffold123.9227,evm.model.scaffold193.11588,evm.model.scaffold491.17924,evm.model.scaffold408.16694,evm.model.scaffold59.5863,evm.model.scaffold685.20043,evm.model.scaffold197.11698,evm.model.scaffold101.8201,evm.model.scaffold50.4590,evm.model.scaffold5…
Biological process	negative regulation of response to wounding	GO:1903035	0.047081	25	531	1.08789e-05	0.000363455	25	2.64264	evm.model.scaffold30.2966,evm.model.scaffold390.16245,evm.model.scaffold450.17285,evm.model.scaffold121.9181,evm.model.scaffold422.16882,evm.model.scaffold117.8888,evm.model.scaffold1653.23894,evm.model.scaffold1432.23534,evm.model.scaffold3.276,evm.model.scaffold351.15333,evm.model.scaffold321.14713,evm.model.scaffold290.14172,evm.model.scaffold638.19692,evm.model.scaffold840.21238,evm.model.sca…
Biological process	gland morphogenesis	GO:0022612	0.0546139	29	531	1.11431e-05	0.000370875	29	2.42857	evm.model.scaffold63.6075,evm.model.scaffold668.19893,evm.model.scaffold1141.22698,evm.model.scaffold127.9368,evm.model.scaffold57.5666,evm.model.scaffold166.10795,evm.model.scaffold384.16141,evm.model.scaffold384.16138,evm.model.scaffold12.1145,evm.model.scaffold247.13101,evm.model.scaffold108.8545,evm.model.scaffold3.276,evm.model.scaffold457.17402,evm.model.scaffold1608.23837,evm.model.scaffol…
Biological process	proteoglycan catabolic process	GO:0030167	0.0112994	6	531	1.11712e-05	0.000370414	6	11.004	evm.model.scaffold30.2966,evm.model.scaffold593.19156,evm.model.scaffold162.10694,evm.model.scaffold191.11537,evm.model.scaffold191.11538,evm.model.scaffold466.17527,
Biological process	peptide secretion	GO:0002790	0.0847458	45	531	1.12201e-05	0.000370642	45	1.97676	evm.model.scaffold233.12647,evm.model.scaffold77.6782,evm.model.scaffold298.14290,evm.model.scaffold564.18774,evm.model.scaffold1204.22913,evm.model.scaffold121.9181,evm.model.scaffold195.11633,evm.model.scaffold422.16882,evm.model.scaffold865.21421,evm.model.scaffold82.7109,evm.model.scaffold182.11288,evm.model.scaffold57.5666,evm.model.scaffold14.1522,evm.model.scaffold50.4573,evm.model.scaffol…
Biological process	peptide hormone secretion	GO:0030072	0.0828625	44	531	1.12452e-05	0.000370084	44	1.99495	evm.model.scaffold233.12647,evm.model.scaffold77.6782,evm.model.scaffold298.14290,evm.model.scaffold564.18774,evm.model.scaffold1204.22913,evm.model.scaffold121.9181,evm.model.scaffold195.11633,evm.model.scaffold422.16882,evm.model.scaffold865.21421,evm.model.scaffold82.7109,evm.model.scaffold182.11288,evm.model.scaffold57.5666,evm.model.scaffold14.1522,evm.model.scaffold50.4573,evm.model.scaffol…
Biological process	hormone transport	GO:0009914	0.101695	54	531	1.13693e-05	0.000372777	54	1.84081	evm.model.scaffold233.12647,evm.model.scaffold77.6782,evm.model.scaffold298.14290,evm.model.scaffold564.18774,evm.model.scaffold778.20743,evm.model.scaffold516.18218,evm.model.scaffold1204.22913,evm.model.scaffold121.9181,evm.model.scaffold195.11633,evm.model.scaffold422.16882,evm.model.scaffold127.9368,evm.model.scaffold865.21421,evm.model.scaffold82.7109,evm.model.scaffold182.11288,evm.model.sc…
Biological process	striated muscle cell proliferation	GO:0014855	0.0320151	17	531	1.14415e-05	0.000373757	17	3.40742	evm.model.scaffold1727.23994,evm.model.scaffold524.18311,evm.model.scaffold127.9368,evm.model.scaffold166.10795,evm.model.scaffold243.13040,evm.model.scaffold45.4005,evm.model.scaffold311.14510,evm.model.scaffold20.2014,evm.model.scaffold101.8256,evm.model.scaffold804.20949,evm.model.scaffold980.22013,evm.model.scaffold95.7944,evm.model.scaffold104.8408,evm.model.scaffold840.21251,evm.model.scaff…
Biological process	stress-activated MAPK cascade	GO:0051403	0.0659134	35	531	1.14977e-05	0.000374205	35	2.20583	evm.model.scaffold233.12647,evm.model.scaffold77.6782,evm.model.scaffold778.20743,evm.model.scaffold89.7664,evm.model.scaffold118.8991,evm.model.scaffold865.21421,evm.model.scaffold59.5863,evm.model.scaffold166.10795,evm.model.scaffold148.10294,evm.model.scaffold101.8201,evm.model.scaffold1432.23535,evm.model.scaffold50.4590,evm.model.scaffold610.19365,evm.model.scaffold414.16778,evm.model.scaffo…
Biological process	transmembrane receptor protein serine/threonine kinase signaling pathway	GO:0007178	0.0847458	45	531	1.15614e-05	0.000374897	45	1.97439	evm.model.scaffold233.12647,evm.model.scaffold469.17610,evm.model.scaffold201.11761,evm.model.scaffold69.6333,evm.model.scaffold564.18774,evm.model.scaffold69.6332,evm.model.scaffold375.15950,evm.model.scaffold35.3322,evm.model.scaffold688.20066,evm.model.scaffold117.8888,evm.model.scaffold1430.23528,evm.model.scaffold59.5863,evm.model.scaffold685.20043,evm.model.scaffold459.17451,evm.model.scaff…
Biological process	wound healing	GO:0042060	0.12806	68	531	1.20508e-05	0.000389335	68	1.69675	evm.model.scaffold30.2966,evm.model.scaffold77.6782,evm.model.scaffold17.1782,evm.model.scaffold926.21746,evm.model.scaffold390.16245,evm.model.scaffold69.6332,evm.model.scaffold778.20743,evm.model.scaffold142.10011,evm.model.scaffold30.2989,evm.model.scaffold450.17285,evm.model.scaffold444.17178,evm.model.scaffold121.9181,evm.model.scaffold422.16882,evm.model.scaffold117.8888,evm.model.scaffold8…
Biological process	apoptotic process involved in morphogenesis	GO:0060561	0.0225989	12	531	1.29313e-05	0.000416255	12	4.53771	evm.model.scaffold57.5666,evm.model.scaffold101.8201,evm.model.scaffold45.4005,evm.model.scaffold391.16267,evm.model.scaffold20.2014,evm.model.scaffold312.14524,evm.model.scaffold181.11247,evm.model.scaffold16.1696,evm.model.scaffold308.14483,evm.model.scaffold80.7004,evm.model.scaffold80.7003,evm.model.scaffold104.8408,
Biological process	excitatory postsynaptic potential	GO:0060079	0.0338983	18	531	1.2953e-05	0.000415438	18	3.23646	evm.model.scaffold778.20743,evm.model.scaffold429.16970,evm.model.scaffold524.18311,evm.model.scaffold89.7664,evm.model.scaffold71.6458,evm.model.scaffold101.8201,evm.model.scaffold705.20217,evm.model.scaffold50.4590,evm.model.scaffold18.1817,evm.model.scaffold290.14174,evm.model.scaffold901.21605,evm.model.scaffold980.22013,evm.model.scaffold88.7384,evm.model.scaffold90.7693,evm.model.scaffold33…
Biological process	positive regulation of catalytic activity	GO:0043085	0.193974	103	531	1.35775e-05	0.000433889	103	1.49922	evm.model.scaffold233.12647,evm.model.scaffold66.6167,evm.model.scaffold298.14290,evm.model.scaffold120.9126,evm.model.scaffold227.12504,evm.model.scaffold429.16970,evm.model.scaffold63.6075,evm.model.scaffold668.19893,evm.model.scaffold11.1090,evm.model.scaffold444.17178,evm.model.scaffold121.9181,evm.model.scaffold123.9227,evm.model.scaffold118.8991,evm.model.scaffold117.8888,evm.model.scaffold…
Biological process	regulation of developmental growth	GO:0048638	0.105461	56	531	1.3661e-05	0.000434981	56	1.80498	evm.model.scaffold1727.23994,evm.model.scaffold17.1782,evm.model.scaffold69.6333,evm.model.scaffold69.6332,evm.model.scaffold63.6075,evm.model.scaffold524.18311,evm.model.scaffold127.9368,evm.model.scaffold491.17924,evm.model.scaffold120.9152,evm.model.scaffold82.7109,evm.model.scaffold298.14273,evm.model.scaffold459.17451,evm.model.scaffold243.13040,evm.model.scaffold148.10294,evm.model.scaffold…
Biological process	positive regulation of protein modification process	GO:0031401	0.175141	93	531	1.40481e-05	0.0004457	93	1.53936	evm.model.scaffold1727.23994,evm.model.scaffold233.12647,evm.model.scaffold390.16245,evm.model.scaffold564.18771,evm.model.scaffold227.12504,evm.model.scaffold516.18218,evm.model.scaffold1018.22191,evm.model.scaffold429.16970,evm.model.scaffold668.19893,evm.model.scaffold1204.22913,evm.model.scaffold450.17285,evm.model.scaffold113.8721,evm.model.scaffold123.9227,evm.model.scaffold360.15477,evm.mo…
Biological process	regulation of growth	GO:0040008	0.161959	86	531	1.43064e-05	0.000452267	86	1.57252	evm.model.scaffold1727.23994,evm.model.scaffold233.12647,evm.model.scaffold66.6167,evm.model.scaffold17.1782,evm.model.scaffold233.12648,evm.model.scaffold69.6333,evm.model.scaffold69.6332,evm.model.scaffold63.6075,evm.model.scaffold524.18311,evm.model.scaffold121.9181,evm.model.scaffold127.9368,evm.model.scaffold491.17924,evm.model.scaffold120.9152,evm.model.scaffold699.20193,evm.model.scaffold4…
Biological process	collagen fibril organization	GO:0030199	0.0301318	16	531	1.50926e-05	0.000475418	16	3.49332	evm.model.scaffold390.16245,evm.model.scaffold255.13354,evm.model.scaffold142.10011,evm.model.scaffold30.2989,evm.model.scaffold676.19971,evm.model.scaffold62.6004,evm.model.scaffold685.20043,evm.model.scaffold166.10795,evm.model.scaffold45.4005,evm.model.scaffold783.20810,evm.model.scaffold414.16778,evm.model.scaffold3.276,evm.model.scaffold571.18873,evm.model.scaffold638.19688,evm.model.scaffol…
Biological process	positive regulation of MAPK cascade	GO:0043410	0.0998117	53	531	1.52527e-05	0.000478751	53	1.83399	evm.model.scaffold233.12647,evm.model.scaffold77.6782,evm.model.scaffold778.20743,evm.model.scaffold195.11636,evm.model.scaffold113.8721,evm.model.scaffold195.11633,evm.model.scaffold360.15477,evm.model.scaffold422.16882,evm.model.scaffold127.9368,evm.model.scaffold865.21421,evm.model.scaffold120.9152,evm.model.scaffold59.5863,evm.model.scaffold39.3591,evm.model.scaffold182.11288,evm.model.scaffo…
Biological process	positive regulation of neurogenesis	GO:0050769	0.0715631	38	531	1.53851e-05	0.000481194	38	2.09599	evm.model.scaffold233.12647,evm.model.scaffold298.14290,evm.model.scaffold17.1782,evm.model.scaffold69.6332,evm.model.scaffold375.15950,evm.model.scaffold778.20743,evm.model.scaffold121.9181,evm.model.scaffold491.17924,evm.model.scaffold508.18123,evm.model.scaffold37.3511,evm.model.scaffold247.13101,evm.model.scaffold12.1152,evm.model.scaffold311.14510,evm.model.scaffold391.16267,evm.model.scaffo…
Biological process	mesenchymal cell differentiation	GO:0048762	0.0640301	34	531	1.62809e-05	0.000507411	34	2.1995	evm.model.scaffold120.9126,evm.model.scaffold255.13354,evm.model.scaffold564.18771,evm.model.scaffold35.3322,evm.model.scaffold257.13419,evm.model.scaffold63.6075,evm.model.scaffold62.6004,evm.model.scaffold367.15739,evm.model.scaffold118.8991,evm.model.scaffold127.9368,evm.model.scaffold685.20043,evm.model.scaffold166.10795,evm.model.scaffold45.4005,evm.model.scaffold414.16778,evm.model.scaffold…
Biological process	negative regulation of transmembrane receptor protein serine/threonine kinase signaling pathway	GO:0090101	0.0376648	20	531	1.65e-05	0.000512429	20	2.95805	evm.model.scaffold233.12647,evm.model.scaffold201.11761,evm.model.scaffold117.8888,evm.model.scaffold59.5863,evm.model.scaffold685.20043,evm.model.scaffold14.1522,evm.model.scaffold414.16778,evm.model.scaffold86.7243,evm.model.scaffold351.15211,evm.model.scaffold340.15060,evm.model.scaffold340.15061,evm.model.scaffold248.13205,evm.model.scaffold354.15371,evm.model.scaffold308.14483,evm.model.scaf…
Biological process	negative regulation of defense response	GO:0031348	0.0828625	44	531	1.66223e-05	0.000514415	44	1.9634	evm.model.scaffold233.12647,evm.model.scaffold469.17610,evm.model.scaffold306.14449,evm.model.scaffold233.12648,evm.model.scaffold444.17178,evm.model.scaffold121.9181,evm.model.scaffold195.11633,evm.model.scaffold223.12410,evm.model.scaffold792.20877,evm.model.scaffold1653.23894,evm.model.scaffold223.12409,evm.model.scaffold538.18475,evm.model.scaffold12.1294,evm.model.scaffold465.17518,evm.model…
Biological process	negative chemotaxis	GO:0050919	0.0244821	13	531	1.68553e-05	0.000519803	13	4.11067	evm.model.scaffold247.13101,evm.model.scaffold39.3604,evm.model.scaffold373.15916,evm.model.scaffold840.21238,evm.model.scaffold31.3079,evm.model.scaffold181.11247,evm.model.scaffold134.9699,evm.model.scaffold71.6509,evm.model.scaffold30.2908,evm.model.scaffold79.6968,evm.model.scaffold217.12252,evm.model.scaffold85.7227,evm.model.scaffold85.7218,
Biological process	regulation of secretion by cell	GO:1903530	0.143126	76	531	1.75832e-05	0.000540363	76	1.62074	evm.model.scaffold233.12647,evm.model.scaffold77.6782,evm.model.scaffold298.14290,evm.model.scaffold926.21746,evm.model.scaffold69.6333,evm.model.scaffold564.18774,evm.model.scaffold69.6332,evm.model.scaffold778.20743,evm.model.scaffold1204.22913,evm.model.scaffold121.9181,evm.model.scaffold195.11633,evm.model.scaffold422.16882,evm.model.scaffold127.9368,evm.model.scaffold865.21421,evm.model.scaf…
Biological process	developmental maturation	GO:0021700	0.0998117	53	531	1.7805e-05	0.000545278	53	1.82367	evm.model.scaffold69.6333,evm.model.scaffold69.6332,evm.model.scaffold564.18771,evm.model.scaffold375.15952,evm.model.scaffold257.13419,evm.model.scaffold429.16970,evm.model.scaffold444.17178,evm.model.scaffold367.15739,evm.model.scaffold422.16882,evm.model.scaffold193.11588,evm.model.scaffold127.9368,evm.model.scaffold120.9152,evm.model.scaffold685.20043,evm.model.scaffold182.11288,evm.model.sca…
Biological process	regulation of ion transport	GO:0043269	0.143126	76	531	1.79384e-05	0.000547462	76	1.6198	evm.model.scaffold120.9126,evm.model.scaffold17.1782,evm.model.scaffold69.6333,evm.model.scaffold69.6332,evm.model.scaffold375.15950,evm.model.scaffold778.20743,evm.model.scaffold257.13419,evm.model.scaffold481.17764,evm.model.scaffold367.15739,evm.model.scaffold121.9181,evm.model.scaffold755.20553,evm.model.scaffold89.7664,evm.model.scaffold127.9368,evm.model.scaffold978.22000,evm.model.scaffold…
Biological process	striated muscle cell differentiation	GO:0051146	0.0903955	48	531	1.80551e-05	0.000549124	48	1.89112	evm.model.scaffold233.12647,evm.model.scaffold926.21746,evm.model.scaffold257.13419,evm.model.scaffold177.11091,evm.model.scaffold524.18311,evm.model.scaffold367.15739,evm.model.scaffold693.20101,evm.model.scaffold408.16694,evm.model.scaffold59.5863,evm.model.scaffold39.3591,evm.model.scaffold685.20043,evm.model.scaffold243.13040,evm.model.scaffold1122.22625,evm.model.scaffold465.17515,evm.model.…
Biological process	smooth muscle contraction	GO:0006939	0.0508475	27	531	1.89223e-05	0.000573521	27	2.45138	evm.model.scaffold120.9126,evm.model.scaffold564.18774,evm.model.scaffold564.18771,evm.model.scaffold755.20553,evm.model.scaffold21.2089,evm.model.scaffold182.11288,evm.model.scaffold1122.22625,evm.model.scaffold26.2622,evm.model.scaffold108.8545,evm.model.scaffold12.1152,evm.model.scaffold313.14534,evm.model.scaffold39.3604,evm.model.scaffold261.13531,evm.model.scaffold435.17065,evm.model.scaffo…
Biological process	regulation of protein modification process	GO:0031399	0.244821	130	531	1.91946e-05	0.000579783	130	1.40536	evm.model.scaffold1727.23994,evm.model.scaffold233.12647,evm.model.scaffold926.21746,evm.model.scaffold390.16245,evm.model.scaffold233.12648,evm.model.scaffold69.6333,evm.model.scaffold564.18774,evm.model.scaffold69.6332,evm.model.scaffold564.18771,evm.model.scaffold227.12504,evm.model.scaffold516.18218,evm.model.scaffold1018.22191,evm.model.scaffold429.16970,evm.model.scaffold668.19893,evm.model…
Biological process	branching morphogenesis of an epithelial tube	GO:0048754	0.0659134	35	531	1.96665e-05	0.000592008	35	2.15041	evm.model.scaffold30.2966,evm.model.scaffold120.9126,evm.model.scaffold257.13419,evm.model.scaffold63.6075,evm.model.scaffold367.15739,evm.model.scaffold685.20043,evm.model.scaffold57.5666,evm.model.scaffold538.18475,evm.model.scaffold45.4005,evm.model.scaffold414.16778,evm.model.scaffold108.8545,evm.model.scaffold3.276,evm.model.scaffold666.19878,evm.model.scaffold571.18873,evm.model.scaffold435…
Biological process	extracellular matrix assembly	GO:0085029	0.0244821	13	531	2.0281e-05	0.000608429	13	4.041	evm.model.scaffold564.18774,evm.model.scaffold57.5666,evm.model.scaffold50.4591,evm.model.scaffold1122.22625,evm.model.scaffold14.1522,evm.model.scaffold3.276,evm.model.scaffold351.15211,evm.model.scaffold321.14713,evm.model.scaffold234.12856,evm.model.scaffold544.18544,evm.model.scaffold41.3757,evm.model.scaffold617.19445,evm.model.scaffold30.2908,
Biological process	cellular response to organic cyclic compound	GO:0071407	0.135593	72	531	2.02921e-05	0.000606699	72	1.64034	evm.model.scaffold298.14290,evm.model.scaffold233.12648,evm.model.scaffold564.18771,evm.model.scaffold375.15950,evm.model.scaffold778.20743,evm.model.scaffold257.13419,evm.model.scaffold574.18975,evm.model.scaffold524.18311,evm.model.scaffold1204.22913,evm.model.scaffold1141.22698,evm.model.scaffold367.15739,evm.model.scaffold755.20553,evm.model.scaffold118.8991,evm.model.scaffold408.16694,evm.mo…
Biological process	muscle organ morphogenesis	GO:0048644	0.0376648	20	531	2.20379e-05	0.00065667	20	2.89959	evm.model.scaffold926.21746,evm.model.scaffold142.10011,evm.model.scaffold30.2989,evm.model.scaffold429.16970,evm.model.scaffold450.17285,evm.model.scaffold491.17924,evm.model.scaffold59.5863,evm.model.scaffold243.13040,evm.model.scaffold45.4005,evm.model.scaffold465.17515,evm.model.scaffold1115.22607,evm.model.scaffold602.19247,evm.model.scaffold67.6219,evm.model.scaffold294.14213,evm.model.scaf…
Biological process	regulation of lymphocyte activation	GO:0051249	0.0979284	52	531	2.26434e-05	0.00067244	52	1.81999	evm.model.scaffold233.12647,evm.model.scaffold77.6782,evm.model.scaffold465.17498,evm.model.scaffold117.8847,evm.model.scaffold257.13419,evm.model.scaffold1018.22191,evm.model.scaffold62.6004,evm.model.scaffold444.17178,evm.model.scaffold367.15739,evm.model.scaffold113.8721,evm.model.scaffold360.15477,evm.model.scaffold865.21421,evm.model.scaffold80.7030,evm.model.scaffold693.20101,evm.model.scaf…
Biological process	cell surface receptor signaling pathway involved in cell-cell signaling	GO:1905114	0.116761	62	531	2.35693e-05	0.000697587	62	1.71117	evm.model.scaffold306.14449,evm.model.scaffold69.6332,evm.model.scaffold778.20743,evm.model.scaffold257.13419,evm.model.scaffold429.16970,evm.model.scaffold668.19893,evm.model.scaffold524.18311,evm.model.scaffold367.15739,evm.model.scaffold127.9382,evm.model.scaffold89.7664,evm.model.scaffold491.17924,evm.model.scaffold120.9152,evm.model.scaffold408.16694,evm.model.scaffold59.5863,evm.model.scaff…
Biological process	regulation of defense response	GO:0031347	0.145009	77	531	2.48216e-05	0.000732194	77	1.59839	evm.model.scaffold30.2966,evm.model.scaffold233.12647,evm.model.scaffold469.17610,evm.model.scaffold306.14449,evm.model.scaffold233.12648,evm.model.scaffold564.18771,evm.model.scaffold1204.22913,evm.model.scaffold444.17178,evm.model.scaffold121.9181,evm.model.scaffold113.8721,evm.model.scaffold195.11633,evm.model.scaffold865.21421,evm.model.scaffold693.20101,evm.model.scaffold120.9152,evm.model.s…
Biological process	cell death	GO:0008219	0.34275	182	531	2.5284e-05	0.00074335	182	1.30106	evm.model.scaffold30.2966,evm.model.scaffold233.12647,evm.model.scaffold77.6782,evm.model.scaffold298.14290,evm.model.scaffold201.11761,evm.model.scaffold120.9126,evm.model.scaffold17.1782,evm.model.scaffold465.17498,evm.model.scaffold516.18216,evm.model.scaffold564.18771,evm.model.scaffold375.15950,evm.model.scaffold117.8847,evm.model.scaffold227.12504,evm.model.scaffold257.13419,evm.model.scaff…
Biological process	regulation of epithelial cell migration	GO:0010632	0.0640301	34	531	2.58939e-05	0.000758752	34	2.1502	evm.model.scaffold30.2966,evm.model.scaffold69.6332,evm.model.scaffold524.18311,evm.model.scaffold127.9382,evm.model.scaffold123.9227,evm.model.scaffold127.9368,evm.model.scaffold491.17924,evm.model.scaffold27.2685,evm.model.scaffold166.10795,evm.model.scaffold69.6292,evm.model.scaffold101.8201,evm.model.scaffold50.4590,evm.model.scaffold45.4005,evm.model.scaffold412.16756,evm.model.scaffold12.11…
Biological process	camera-type eye development	GO:0043010	0.0960452	51	531	2.66614e-05	0.000778655	51	1.82149	evm.model.scaffold233.12647,evm.model.scaffold177.11091,evm.model.scaffold63.6075,evm.model.scaffold83.7126,evm.model.scaffold444.17178,evm.model.scaffold426.16937,evm.model.scaffold121.9181,evm.model.scaffold755.20553,evm.model.scaffold121.9179,evm.model.scaffold280.14000,evm.model.scaffold120.9152,evm.model.scaffold699.20193,evm.model.scaffold57.5666,evm.model.scaffold101.8201,evm.model.scaffol…
Biological process	regulation of cartilage development	GO:0061035	0.0301318	16	531	3.09486e-05	0.000900881	16	3.29707	evm.model.scaffold30.2966,evm.model.scaffold233.12647,evm.model.scaffold255.13354,evm.model.scaffold564.18774,evm.model.scaffold429.16970,evm.model.scaffold62.6004,evm.model.scaffold80.7030,evm.model.scaffold685.20043,evm.model.scaffold14.1522,evm.model.scaffold75.6618,evm.model.scaffold351.15211,evm.model.scaffold466.17527,evm.model.scaffold18.1886,evm.model.scaffold308.14483,evm.model.scaffold2…
Biological process	heart growth	GO:0060419	0.0414313	22	531	3.23713e-05	0.000939193	22	2.66322	evm.model.scaffold1727.23994,evm.model.scaffold926.21746,evm.model.scaffold429.16970,evm.model.scaffold524.18311,evm.model.scaffold127.9368,evm.model.scaffold166.10795,evm.model.scaffold243.13040,evm.model.scaffold45.4005,evm.model.scaffold313.14534,evm.model.scaffold311.14510,evm.model.scaffold20.2014,evm.model.scaffold1115.22607,evm.model.scaffold101.8256,evm.model.scaffold67.6219,evm.model.sca…
Biological process	stress-activated protein kinase signaling cascade	GO:0031098	0.0659134	35	531	3.286e-05	0.000950248	35	2.0977	evm.model.scaffold233.12647,evm.model.scaffold77.6782,evm.model.scaffold778.20743,evm.model.scaffold89.7664,evm.model.scaffold118.8991,evm.model.scaffold865.21421,evm.model.scaffold59.5863,evm.model.scaffold166.10795,evm.model.scaffold148.10294,evm.model.scaffold101.8201,evm.model.scaffold1432.23535,evm.model.scaffold50.4590,evm.model.scaffold610.19365,evm.model.scaffold414.16778,evm.model.scaffo…
Biological process	regulation of programmed cell death	GO:0043067	0.265537	141	531	3.46358e-05	0.000998325	141	1.36389	evm.model.scaffold30.2966,evm.model.scaffold77.6782,evm.model.scaffold298.14290,evm.model.scaffold120.9126,evm.model.scaffold17.1782,evm.model.scaffold465.17498,evm.model.scaffold564.18771,evm.model.scaffold117.8847,evm.model.scaffold227.12504,evm.model.scaffold257.13419,evm.model.scaffold1018.22191,evm.model.scaffold83.7126,evm.model.scaffold1141.22698,evm.model.scaffold450.17285,evm.model.scaff…
Biological process	regulation of intracellular signal transduction	GO:1902531	0.26742	142	531	3.7157e-05	0.00106751	142	1.35993	evm.model.scaffold233.12647,evm.model.scaffold66.6167,evm.model.scaffold77.6782,evm.model.scaffold298.14290,evm.model.scaffold390.16245,evm.model.scaffold320.14682,evm.model.scaffold564.18774,evm.model.scaffold778.20743,evm.model.scaffold117.8847,evm.model.scaffold11.1090,evm.model.scaffold1204.22913,evm.model.scaffold444.17178,evm.model.scaffold195.11636,evm.model.scaffold113.8721,evm.model.scaf…
Biological process	presynapse organization	GO:0099172	0.0301318	16	531	3.7968e-05	0.00108727	16	3.24242	evm.model.scaffold450.17285,evm.model.scaffold59.5863,evm.model.scaffold57.5666,evm.model.scaffold101.8201,evm.model.scaffold50.4590,evm.model.scaffold610.19365,evm.model.scaffold1222.22985,evm.model.scaffold901.21605,evm.model.scaffold804.20949,evm.model.scaffold294.14213,evm.model.scaffold41.3742,evm.model.scaffold181.11247,evm.model.scaffold227.12492,evm.model.scaffold260.13495,evm.model.scaff…
Biological process	biomineral tissue development	GO:0031214	0.0546139	29	531	3.93516e-05	0.00112324	29	2.26805	evm.model.scaffold233.12647,evm.model.scaffold298.14290,evm.model.scaffold233.12648,evm.model.scaffold564.18774,evm.model.scaffold810.21038,evm.model.scaffold429.16970,evm.model.scaffold121.9181,evm.model.scaffold755.20553,evm.model.scaffold360.15477,evm.model.scaffold685.20043,evm.model.scaffold384.16141,evm.model.scaffold384.16138,evm.model.scaffold14.1522,evm.model.scaffold351.15211,evm.model.…
Biological process	apoptotic process involved in development	GO:1902742	0.0263653	14	531	4.05882e-05	0.0011548	14	3.5661	evm.model.scaffold57.5666,evm.model.scaffold101.8201,evm.model.scaffold45.4005,evm.model.scaffold391.16267,evm.model.scaffold20.2014,evm.model.scaffold312.14524,evm.model.scaffold181.11247,evm.model.scaffold134.9699,evm.model.scaffold16.1696,evm.model.scaffold308.14483,evm.model.scaffold80.7004,evm.model.scaffold80.7003,evm.model.scaffold104.8408,evm.model.scaffold840.21268,
Biological process	phenol-containing compound biosynthetic process	GO:0046189	0.0263653	14	531	4.05882e-05	0.0011548	14	3.5661	evm.model.scaffold280.14000,evm.model.scaffold360.15477,evm.model.scaffold704.20212,evm.model.scaffold45.4062,evm.model.scaffold811.21042,evm.model.scaffold165.10758,evm.model.scaffold934.21786,evm.model.scaffold292.14185,evm.model.scaffold116.8798,evm.model.scaffold708.20241,evm.model.scaffold531.18409,evm.model.scaffold351.15266,evm.model.scaffold1088.22456,evm.model.scaffold1.32,
Biological process	biomineralization	GO:0110148	0.0546139	29	531	4.08904e-05	0.00115594	29	2.26322	evm.model.scaffold233.12647,evm.model.scaffold298.14290,evm.model.scaffold233.12648,evm.model.scaffold564.18774,evm.model.scaffold810.21038,evm.model.scaffold429.16970,evm.model.scaffold121.9181,evm.model.scaffold755.20553,evm.model.scaffold360.15477,evm.model.scaffold685.20043,evm.model.scaffold384.16141,evm.model.scaffold384.16138,evm.model.scaffold14.1522,evm.model.scaffold351.15211,evm.model.…
Biological process	regulation of biological quality	GO:0065008	0.564972	300	531	4.12087e-05	0.00116122	300	1.1774	evm.model.scaffold30.2966,evm.model.scaffold233.12647,evm.model.scaffold77.6782,evm.model.scaffold117.8835,evm.model.scaffold298.14290,evm.model.scaffold120.9126,evm.model.scaffold17.1782,evm.model.scaffold390.16245,evm.model.scaffold233.12648,evm.model.scaffold69.6333,evm.model.scaffold465.17498,evm.model.scaffold516.18216,evm.model.scaffold564.18774,evm.model.scaffold69.6332,evm.model.scaffold5…
Biological process	regulation of hair follicle development	GO:0051797	0.0150659	8	531	4.182e-05	0.00117469	8	6.11331	evm.model.scaffold166.10795,evm.model.scaffold564.18750,evm.model.scaffold593.19156,evm.model.scaffold162.10694,evm.model.scaffold191.11537,evm.model.scaffold191.11538,evm.model.scaffold54.5565,evm.model.scaffold840.21268,
Biological process	cardiac chamber development	GO:0003205	0.0564972	30	531	4.20736e-05	0.00117806	30	2.22302	evm.model.scaffold320.14682,evm.model.scaffold35.3322,evm.model.scaffold257.13419,evm.model.scaffold142.10011,evm.model.scaffold30.2989,evm.model.scaffold450.17285,evm.model.scaffold367.15739,evm.model.scaffold491.17924,evm.model.scaffold59.5863,evm.model.scaffold166.10795,evm.model.scaffold243.13040,evm.model.scaffold45.4005,evm.model.scaffold1122.22625,evm.model.scaffold14.1522,evm.model.scaffo…
Biological process	metal ion transport	GO:0030001	0.148776	79	531	4.48103e-05	0.00125072	79	1.55958	evm.model.scaffold233.12647,evm.model.scaffold117.8835,evm.model.scaffold17.1782,evm.model.scaffold69.6333,evm.model.scaffold69.6332,evm.model.scaffold375.15950,evm.model.scaffold778.20743,evm.model.scaffold257.13419,evm.model.scaffold11.1090,evm.model.scaffold481.17764,evm.model.scaffold367.15739,evm.model.scaffold426.16937,evm.model.scaffold755.20553,evm.model.scaffold1015.22174,evm.model.scaff…
Biological process	ion transport	GO:0006811	0.233522	124	531	4.61172e-05	0.00128314	124	1.39433	evm.model.scaffold233.12647,evm.model.scaffold117.8835,evm.model.scaffold120.9126,evm.model.scaffold17.1782,evm.model.scaffold233.12648,evm.model.scaffold69.6333,evm.model.scaffold564.18774,evm.model.scaffold69.6332,evm.model.scaffold375.15950,evm.model.scaffold778.20743,evm.model.scaffold257.13419,evm.model.scaffold516.18218,evm.model.scaffold11.1090,evm.model.scaffold83.7126,evm.model.scaffold4…
Biological process	blood circulation	GO:0008015	0.137476	73	531	4.63235e-05	0.00128482	73	1.59288	evm.model.scaffold30.2966,evm.model.scaffold233.12647,evm.model.scaffold17.1782,evm.model.scaffold926.21746,evm.model.scaffold69.6333,evm.model.scaffold564.18774,evm.model.scaffold69.6332,evm.model.scaffold564.18771,evm.model.scaffold524.18311,evm.model.scaffold121.9181,evm.model.scaffold755.20553,evm.model.scaffold195.11633,evm.model.scaffold89.7664,evm.model.scaffold422.16882,evm.model.scaffold…
Biological process	calcium ion transmembrane import into cytosol	GO:0097553	0.0508475	27	531	4.75667e-05	0.00131517	27	2.32478	evm.model.scaffold233.12647,evm.model.scaffold426.16937,evm.model.scaffold865.21421,evm.model.scaffold182.11288,evm.model.scaffold538.18475,evm.model.scaffold26.2622,evm.model.scaffold108.8545,evm.model.scaffold12.1152,evm.model.scaffold313.14534,evm.model.scaffold265.13610,evm.model.scaffold457.17406,evm.model.scaffold165.10758,evm.model.scaffold934.21786,evm.model.scaffold248.13116,evm.model.sc…
Biological process	actin filament-based process	GO:0030029	0.161959	86	531	4.77053e-05	0.00131488	86	1.52169	evm.model.scaffold233.12647,evm.model.scaffold926.21746,evm.model.scaffold69.6333,evm.model.scaffold69.6332,evm.model.scaffold375.15950,evm.model.scaffold429.16970,evm.model.scaffold177.11091,evm.model.scaffold524.18311,evm.model.scaffold387.16190,evm.model.scaffold426.16937,evm.model.scaffold123.9227,evm.model.scaffold491.17924,evm.model.scaffold4.389,evm.model.scaffold792.20877,evm.model.scaffo…
Biological process	sensory perception of mechanical stimulus	GO:0050954	0.0659134	35	531	4.87574e-05	0.00133969	35	2.05736	evm.model.scaffold117.8835,evm.model.scaffold17.1782,evm.model.scaffold69.6333,evm.model.scaffold69.6332,evm.model.scaffold142.10011,evm.model.scaffold30.2989,evm.model.scaffold676.19971,evm.model.scaffold755.20553,evm.model.scaffold195.11636,evm.model.scaffold117.8888,evm.model.scaffold127.9368,evm.model.scaffold1097.22516,evm.model.scaffold170.10903,evm.model.scaffold21.2089,evm.model.scaffold6…
Biological process	negative regulation of inflammatory response	GO:0050728	0.0433145	23	531	4.92019e-05	0.0013477	23	2.52586	evm.model.scaffold233.12647,evm.model.scaffold306.14449,evm.model.scaffold233.12648,evm.model.scaffold444.17178,evm.model.scaffold121.9181,evm.model.scaffold195.11633,evm.model.scaffold538.18475,evm.model.scaffold50.4555,evm.model.scaffold391.16267,evm.model.scaffold261.13531,evm.model.scaffold351.15333,evm.model.scaffold8.878,evm.model.scaffold883.21515,evm.model.scaffold148.10359,evm.model.scaf…
Biological process	regulation of cell activation	GO:0050865	0.116761	62	531	5.05951e-05	0.00138158	62	1.66727	evm.model.scaffold30.2966,evm.model.scaffold233.12647,evm.model.scaffold77.6782,evm.model.scaffold233.12648,evm.model.scaffold465.17498,evm.model.scaffold117.8847,evm.model.scaffold257.13419,evm.model.scaffold1018.22191,evm.model.scaffold62.6004,evm.model.scaffold450.17285,evm.model.scaffold444.17178,evm.model.scaffold367.15739,evm.model.scaffold113.8721,evm.model.scaffold360.15477,evm.model.scaf…
Biological process	mesenchymal cell migration	GO:0090497	0.0263653	14	531	5.09836e-05	0.00138789	14	3.49332	evm.model.scaffold120.9126,evm.model.scaffold564.18771,evm.model.scaffold35.3322,evm.model.scaffold63.6075,evm.model.scaffold50.4591,evm.model.scaffold45.4005,evm.model.scaffold108.8545,evm.model.scaffold435.17065,evm.model.scaffold602.19247,evm.model.scaffold156.10549,evm.model.scaffold25.2562,evm.model.scaffold840.21251,evm.model.scaffold85.7227,evm.model.scaffold85.7218,
Biological process	positive regulation of cell development	GO:0010720	0.0903955	48	531	5.19161e-05	0.00140892	48	1.81322	evm.model.scaffold233.12647,evm.model.scaffold298.14290,evm.model.scaffold17.1782,evm.model.scaffold69.6332,evm.model.scaffold375.15950,evm.model.scaffold778.20743,evm.model.scaffold429.16970,evm.model.scaffold524.18311,evm.model.scaffold121.9181,evm.model.scaffold422.16882,evm.model.scaffold865.21421,evm.model.scaffold491.17924,evm.model.scaffold508.18123,evm.model.scaffold37.3511,evm.model.scaf…
Biological process	muscle tissue morphogenesis	GO:0060415	0.0338983	18	531	5.71277e-05	0.0015456	18	2.89578	evm.model.scaffold926.21746,evm.model.scaffold142.10011,evm.model.scaffold30.2989,evm.model.scaffold429.16970,evm.model.scaffold491.17924,evm.model.scaffold59.5863,evm.model.scaffold243.13040,evm.model.scaffold45.4005,evm.model.scaffold465.17515,evm.model.scaffold1115.22607,evm.model.scaffold602.19247,evm.model.scaffold67.6219,evm.model.scaffold354.15371,evm.model.scaffold891.21560,evm.model.scaf…
Biological process	positive regulation of gene expression	GO:0010628	0.201507	107	531	5.93895e-05	0.00160188	107	1.43343	evm.model.scaffold233.12647,evm.model.scaffold120.9126,evm.model.scaffold926.21746,evm.model.scaffold69.6333,evm.model.scaffold465.17498,evm.model.scaffold69.6332,evm.model.scaffold35.3322,evm.model.scaffold11.1075,evm.model.scaffold257.13419,evm.model.scaffold1018.22191,evm.model.scaffold574.18975,evm.model.scaffold668.19893,evm.model.scaffold1204.22913,evm.model.scaffold1141.22698,evm.model.sca…
Biological process	maintenance of synapse structure	GO:0099558	0.0169492	9	531	6.39178e-05	0.00171877	9	5.07875	evm.model.scaffold69.6333,evm.model.scaffold69.6332,evm.model.scaffold117.8847,evm.model.scaffold705.20217,evm.model.scaffold901.21605,evm.model.scaffold25.2498,evm.model.scaffold41.3742,evm.model.scaffold88.7384,evm.model.scaffold85.7215,
Biological process	skin development	GO:0043588	0.0715631	38	531	6.5273e-05	0.00174987	38	1.96039	evm.model.scaffold926.21746,evm.model.scaffold465.17498,evm.model.scaffold35.3322,evm.model.scaffold142.10011,evm.model.scaffold30.2989,evm.model.scaffold63.6075,evm.model.scaffold668.19893,evm.model.scaffold280.14000,evm.model.scaffold117.8888,evm.model.scaffold127.9368,evm.model.scaffold491.17924,evm.model.scaffold57.5666,evm.model.scaffold166.10795,evm.model.scaffold338.15039,evm.model.scaffol…
Biological process	organ growth	GO:0035265	0.0602637	32	531	6.54654e-05	0.00174971	32	2.10728	evm.model.scaffold1727.23994,evm.model.scaffold926.21746,evm.model.scaffold564.18774,evm.model.scaffold429.16970,evm.model.scaffold524.18311,evm.model.scaffold193.11588,evm.model.scaffold127.9368,evm.model.scaffold685.20043,evm.model.scaffold166.10795,evm.model.scaffold243.13040,evm.model.scaffold45.4005,evm.model.scaffold86.7243,evm.model.scaffold313.14534,evm.model.scaffold311.14510,evm.model.s…
Biological process	regulation of cell population proliferation	GO:0042127	0.333333	177	531	6.55921e-05	0.0017478	177	1.2874	evm.model.scaffold1727.23994,evm.model.scaffold233.12647,evm.model.scaffold77.6782,evm.model.scaffold926.21746,evm.model.scaffold390.16245,evm.model.scaffold233.12648,evm.model.scaffold465.17498,evm.model.scaffold564.18774,evm.model.scaffold564.18771,evm.model.scaffold375.15950,evm.model.scaffold778.20743,evm.model.scaffold35.3322,evm.model.scaffold117.8847,evm.model.scaffold227.12504,evm.model.s…
Biological process	neural crest cell development	GO:0014032	0.0338983	18	531	6.76704e-05	0.00179775	18	2.85817	evm.model.scaffold120.9126,evm.model.scaffold564.18771,evm.model.scaffold35.3322,evm.model.scaffold63.6075,evm.model.scaffold118.8991,evm.model.scaffold685.20043,evm.model.scaffold45.4005,evm.model.scaffold108.8545,evm.model.scaffold435.17065,evm.model.scaffold602.19247,evm.model.scaffold41.3754,evm.model.scaffold156.10549,evm.model.scaffold248.13157,evm.model.scaffold25.2562,evm.model.scaffold84…
Biological process	substrate adhesion-dependent cell spreading	GO:0034446	0.039548	21	531	6.79214e-05	0.001799	21	2.60229	evm.model.scaffold63.6075,evm.model.scaffold524.18311,evm.model.scaffold444.17178,evm.model.scaffold422.16882,evm.model.scaffold59.5863,evm.model.scaffold50.4591,evm.model.scaffold12.1294,evm.model.scaffold610.19365,evm.model.scaffold8.878,evm.model.scaffold6.817,evm.model.scaffold248.13205,evm.model.scaffold234.12856,evm.model.scaffold41.3757,evm.model.scaffold667.19884,evm.model.scaffold980.220…
Biological process	cellular component morphogenesis	GO:0032989	0.248588	132	531	6.9349e-05	0.00183131	132	1.36349	evm.model.scaffold233.12647,evm.model.scaffold298.14290,evm.model.scaffold120.9126,evm.model.scaffold17.1782,evm.model.scaffold926.21746,evm.model.scaffold320.14682,evm.model.scaffold69.6333,evm.model.scaffold516.18216,evm.model.scaffold69.6332,evm.model.scaffold375.15952,evm.model.scaffold117.8847,evm.model.scaffold257.13419,evm.model.scaffold688.20066,evm.model.scaffold177.11091,evm.model.scaff…
Biological process	regulation of ossification	GO:0030278	0.0451977	24	531	7.03649e-05	0.00185259	24	2.41183	evm.model.scaffold233.12647,evm.model.scaffold233.12648,evm.model.scaffold429.16970,evm.model.scaffold121.9181,evm.model.scaffold755.20553,evm.model.scaffold118.8991,evm.model.scaffold160.10630,evm.model.scaffold80.7030,evm.model.scaffold685.20043,evm.model.scaffold57.5666,evm.model.scaffold166.10795,evm.model.scaffold413.16776,evm.model.scaffold14.1522,evm.model.scaffold783.20810,evm.model.scaff…
Biological process	regulation of leukocyte activation	GO:0002694	0.105461	56	531	7.11787e-05	0.00186844	56	1.70039	evm.model.scaffold233.12647,evm.model.scaffold77.6782,evm.model.scaffold233.12648,evm.model.scaffold465.17498,evm.model.scaffold117.8847,evm.model.scaffold257.13419,evm.model.scaffold1018.22191,evm.model.scaffold62.6004,evm.model.scaffold444.17178,evm.model.scaffold367.15739,evm.model.scaffold113.8721,evm.model.scaffold360.15477,evm.model.scaffold865.21421,evm.model.scaffold80.7030,evm.model.scaf…
Biological process	artery development	GO:0060840	0.039548	21	531	7.12737e-05	0.00186538	21	2.59352	evm.model.scaffold30.2966,evm.model.scaffold450.17285,evm.model.scaffold166.10795,evm.model.scaffold50.4591,evm.model.scaffold45.4005,evm.model.scaffold1122.22625,evm.model.scaffold14.1522,evm.model.scaffold412.16756,evm.model.scaffold261.13531,evm.model.scaffold351.15211,evm.model.scaffold586.19075,evm.model.scaffold544.18544,evm.model.scaffold156.10549,evm.model.scaffold294.14213,evm.model.scaf…
Biological process	cardiac myofibril assembly	GO:0055003	0.0169492	9	531	7.22473e-05	0.00188527	9	5.0018	evm.model.scaffold926.21746,evm.model.scaffold1122.22625,evm.model.scaffold465.17515,evm.model.scaffold1115.22607,evm.model.scaffold544.18544,evm.model.scaffold156.10549,evm.model.scaffold67.6219,evm.model.scaffold468.17590,evm.model.scaffold543.18529,
Biological process	lung development	GO:0030324	0.0564972	30	531	7.23776e-05	0.0018831	30	2.15764	evm.model.scaffold233.12647,evm.model.scaffold564.18774,evm.model.scaffold1229.23004,evm.model.scaffold63.6075,evm.model.scaffold62.6004,evm.model.scaffold83.7126,evm.model.scaffold118.8991,evm.model.scaffold127.9368,evm.model.scaffold21.2089,evm.model.scaffold27.2685,evm.model.scaffold101.8201,evm.model.scaffold26.2622,evm.model.scaffold14.1522,evm.model.scaffold783.20810,evm.model.scaffold12.11…
Biological process	calcium ion transport	GO:0006816	0.0885122	47	531	7.28144e-05	0.00188889	47	1.80141	evm.model.scaffold233.12647,evm.model.scaffold17.1782,evm.model.scaffold257.13419,evm.model.scaffold11.1090,evm.model.scaffold367.15739,evm.model.scaffold426.16937,evm.model.scaffold755.20553,evm.model.scaffold865.21421,evm.model.scaffold170.10903,evm.model.scaffold39.3589,evm.model.scaffold182.11288,evm.model.scaffold538.18475,evm.model.scaffold26.2622,evm.model.scaffold50.4573,evm.model.scaffol…
Biological process	regulation of presynapse assembly	GO:1905606	0.0207156	11	531	7.34359e-05	0.00189943	11	4.11713	evm.model.scaffold450.17285,evm.model.scaffold59.5863,evm.model.scaffold101.8201,evm.model.scaffold50.4590,evm.model.scaffold1222.22985,evm.model.scaffold901.21605,evm.model.scaffold804.20949,evm.model.scaffold294.14213,evm.model.scaffold227.12492,evm.model.scaffold260.13495,evm.model.scaffold354.15371,
Biological process	cellular response to vascular endothelial growth factor stimulus	GO:0035924	0.0263653	14	531	7.35172e-05	0.00189597	14	3.37841	evm.model.scaffold30.2966,evm.model.scaffold233.12647,evm.model.scaffold127.9382,evm.model.scaffold699.20193,evm.model.scaffold27.2685,evm.model.scaffold69.6292,evm.model.scaffold312.14524,evm.model.scaffold156.10553,evm.model.scaffold101.8256,evm.model.scaffold466.17527,evm.model.scaffold308.14483,evm.model.scaffold27.2662,evm.model.scaffold258.13472,evm.model.scaffold744.20482,
Biological process	learning or memory	GO:0007611	0.094162	50	531	7.4492e-05	0.00191551	50	1.76176	evm.model.scaffold298.14290,evm.model.scaffold778.20743,evm.model.scaffold117.8847,evm.model.scaffold227.12504,evm.model.scaffold257.13419,evm.model.scaffold177.11091,evm.model.scaffold668.19893,evm.model.scaffold83.7126,evm.model.scaffold367.15739,evm.model.scaffold426.16937,evm.model.scaffold1055.22339,evm.model.scaffold170.10903,evm.model.scaffold182.11288,evm.model.scaffold37.3511,evm.model.s…
Biological process	positive regulation of cellular metabolic process	GO:0031325	0.386064	205	531	7.61009e-05	0.00195119	205	1.2499	evm.model.scaffold1727.23994,evm.model.scaffold233.12647,evm.model.scaffold469.17610,evm.model.scaffold298.14290,evm.model.scaffold120.9126,evm.model.scaffold390.16245,evm.model.scaffold465.17498,evm.model.scaffold564.18774,evm.model.scaffold564.18771,evm.model.scaffold375.15950,evm.model.scaffold778.20743,evm.model.scaffold35.3322,evm.model.scaffold11.1075,evm.model.scaffold227.12504,evm.model.s…
Biological process	semicircular canal development	GO:0060872	0.0131827	7	531	7.76011e-05	0.00198389	7	6.58356	evm.model.scaffold320.14682,evm.model.scaffold429.16970,evm.model.scaffold685.20043,evm.model.scaffold1.32,evm.model.scaffold25.2562,evm.model.scaffold840.21251,evm.model.scaffold241.12997,
Biological process	cognition	GO:0050890	0.0998117	53	531	7.78397e-05	0.00198424	53	1.72496	evm.model.scaffold298.14290,evm.model.scaffold778.20743,evm.model.scaffold117.8847,evm.model.scaffold227.12504,evm.model.scaffold257.13419,evm.model.scaffold177.11091,evm.model.scaffold668.19893,evm.model.scaffold83.7126,evm.model.scaffold367.15739,evm.model.scaffold426.16937,evm.model.scaffold1055.22339,evm.model.scaffold170.10903,evm.model.scaffold182.11288,evm.model.scaffold37.3511,evm.model.s…
Biological process	pigmentation	GO:0043473	0.0433145	23	531	8.05692e-05	0.00204201	23	2.44532	evm.model.scaffold30.2966,evm.model.scaffold233.12648,evm.model.scaffold564.18771,evm.model.scaffold35.3322,evm.model.scaffold450.17285,evm.model.scaffold360.15477,evm.model.scaffold704.20212,evm.model.scaffold45.4062,evm.model.scaffold384.16141,evm.model.scaffold384.16138,evm.model.scaffold108.8545,evm.model.scaffold811.21042,evm.model.scaffold1358.23380,evm.model.scaffold602.19247,evm.model.sca…
Biological process	negative regulation of cell death	GO:0060548	0.19209	102	531	8.43283e-05	0.00213116	102	1.43677	evm.model.scaffold30.2966,evm.model.scaffold233.12647,evm.model.scaffold120.9126,evm.model.scaffold564.18771,evm.model.scaffold117.8847,evm.model.scaffold227.12504,evm.model.scaffold257.13419,evm.model.scaffold1018.22191,evm.model.scaffold1141.22698,evm.model.scaffold450.17285,evm.model.scaffold444.17178,evm.model.scaffold367.15739,evm.model.scaffold195.11633,evm.model.scaffold89.7664,evm.model.s…
Biological process	osteoblast proliferation	GO:0033687	0.0150659	8	531	8.71752e-05	0.00219682	8	5.53658	evm.model.scaffold685.20043,evm.model.scaffold57.5666,evm.model.scaffold3.276,evm.model.scaffold593.19156,evm.model.scaffold162.10694,evm.model.scaffold191.11537,evm.model.scaffold191.11538,evm.model.scaffold78.6835,
Biological process	positive regulation of epithelial cell migration	GO:0010634	0.0433145	23	531	8.78884e-05	0.00220848	23	2.43123	evm.model.scaffold524.18311,evm.model.scaffold127.9382,evm.model.scaffold127.9368,evm.model.scaffold27.2685,evm.model.scaffold166.10795,evm.model.scaffold69.6292,evm.model.scaffold101.8201,evm.model.scaffold50.4590,evm.model.scaffold45.4005,evm.model.scaffold412.16756,evm.model.scaffold393.16282,evm.model.scaffold39.3604,evm.model.scaffold1608.23837,evm.model.scaffold234.12856,evm.model.scaffold1…
Biological process	mononuclear cell differentiation	GO:1903131	0.094162	50	531	8.99936e-05	0.00225495	50	1.74832	evm.model.scaffold77.6782,evm.model.scaffold320.14682,evm.model.scaffold465.17498,evm.model.scaffold257.13419,evm.model.scaffold62.6004,evm.model.scaffold450.17285,evm.model.scaffold444.17178,evm.model.scaffold367.15739,evm.model.scaffold80.7030,evm.model.scaffold693.20101,evm.model.scaffold59.5863,evm.model.scaffold48.4348,evm.model.scaffold39.3591,evm.model.scaffold394.16320,evm.model.scaffold1…
Biological process	regulation of metal ion transport	GO:0010959	0.094162	50	531	8.99936e-05	0.00225495	50	1.74832	evm.model.scaffold17.1782,evm.model.scaffold69.6333,evm.model.scaffold69.6332,evm.model.scaffold375.15950,evm.model.scaffold778.20743,evm.model.scaffold257.13419,evm.model.scaffold367.15739,evm.model.scaffold755.20553,evm.model.scaffold39.3589,evm.model.scaffold182.11288,evm.model.scaffold243.13040,evm.model.scaffold538.18475,evm.model.scaffold26.2622,evm.model.scaffold50.4573,evm.model.scaffold4…
Biological process	regulation of axon extension	GO:0030516	0.039548	21	531	9.03448e-05	0.00225096	21	2.55059	evm.model.scaffold69.6332,evm.model.scaffold491.17924,evm.model.scaffold148.10294,evm.model.scaffold247.13101,evm.model.scaffold3.276,evm.model.scaffold12.1152,evm.model.scaffold351.15333,evm.model.scaffold165.10758,evm.model.scaffold42.3889,evm.model.scaffold1222.22985,evm.model.scaffold638.19692,evm.model.scaffold37.3468,evm.model.scaffold708.20241,evm.model.scaffold840.21238,evm.model.scaffold…
Biological process	regulation of cell size	GO:0008361	0.0640301	34	531	9.08817e-05	0.00225796	34	2.01799	evm.model.scaffold69.6332,evm.model.scaffold755.20553,evm.model.scaffold491.17924,evm.model.scaffold298.14273,evm.model.scaffold148.10294,evm.model.scaffold412.16756,evm.model.scaffold247.13101,evm.model.scaffold3.276,evm.model.scaffold12.1152,evm.model.scaffold351.15333,evm.model.scaffold20.2014,evm.model.scaffold165.10758,evm.model.scaffold586.19075,evm.model.scaffold42.3889,evm.model.scaffold2…
Biological process	heterophilic cell-cell adhesion via plasma membrane cell adhesion molecules	GO:0007157	0.0301318	16	531	9.27692e-05	0.00229838	16	3.00963	evm.model.scaffold233.12647,evm.model.scaffold1018.22191,evm.model.scaffold524.18311,evm.model.scaffold39.3591,evm.model.scaffold311.14510,evm.model.scaffold1115.22607,evm.model.scaffold42.3889,evm.model.scaffold901.21605,evm.model.scaffold980.22013,evm.model.scaffold78.6910,evm.model.scaffold227.12492,evm.model.scaffold308.14483,evm.model.scaffold45.3968,evm.model.scaffold543.18529,evm.model.sca…
Biological process	cellular response to retinoic acid	GO:0071300	0.0282486	15	531	9.35377e-05	0.00231093	15	3.14399	evm.model.scaffold59.5863,evm.model.scaffold243.13040,evm.model.scaffold101.8201,evm.model.scaffold50.4590,evm.model.scaffold3.276,evm.model.scaffold1222.22985,evm.model.scaffold466.17565,evm.model.scaffold260.13495,evm.model.scaffold354.15371,evm.model.scaffold274.13767,evm.model.scaffold275.13884,evm.model.scaffold104.8408,evm.model.scaffold840.21251,evm.model.scaffold241.12998,evm.model.scaffo…
Biological process	positive regulation of cell adhesion	GO:0045785	0.101695	54	531	9.46e-05	0.00233065	54	1.70164	evm.model.scaffold233.12647,evm.model.scaffold117.8847,evm.model.scaffold1018.22191,evm.model.scaffold524.18311,evm.model.scaffold121.9181,evm.model.scaffold195.11633,evm.model.scaffold422.16882,evm.model.scaffold865.21421,evm.model.scaffold80.7030,evm.model.scaffold693.20101,evm.model.scaffold408.16694,evm.model.scaffold39.3591,evm.model.scaffold394.16320,evm.model.scaffold57.5666,evm.model.scaf…
Biological process	motor neuron axon guidance	GO:0008045	0.0282486	15	531	9.97432e-05	0.00245052	15	3.12612	evm.model.scaffold11.1090,evm.model.scaffold45.4005,evm.model.scaffold247.13101,evm.model.scaffold586.19075,evm.model.scaffold156.10553,evm.model.scaffold181.11247,evm.model.scaffold134.9699,evm.model.scaffold80.6998,evm.model.scaffold49.4374,evm.model.scaffold30.2908,evm.model.scaffold85.7227,evm.model.scaffold85.7218,evm.model.scaffold56.5642,evm.model.scaffold241.12998,evm.model.scaffold241.12…
Biological process	leukocyte proliferation	GO:0070661	0.079096	42	531	0.000100246	0.00245603	42	1.8494	evm.model.scaffold233.12647,evm.model.scaffold77.6782,evm.model.scaffold233.12648,evm.model.scaffold117.8847,evm.model.scaffold257.13419,evm.model.scaffold1018.22191,evm.model.scaffold450.17285,evm.model.scaffold367.15739,evm.model.scaffold360.15477,evm.model.scaffold118.8991,evm.model.scaffold422.16882,evm.model.scaffold865.21421,evm.model.scaffold48.4348,evm.model.scaffold685.20043,evm.model.sc…
Biological process	regulation of cellular component size	GO:0032535	0.0922787	49	531	0.000101107	0.00244989	49	1.75177	evm.model.scaffold69.6333,evm.model.scaffold69.6332,evm.model.scaffold177.11091,evm.model.scaffold524.18311,evm.model.scaffold755.20553,evm.model.scaffold123.9227,evm.model.scaffold491.17924,evm.model.scaffold298.14273,evm.model.scaffold792.20877,evm.model.scaffold148.10294,evm.model.scaffold101.8201,evm.model.scaffold50.4590,evm.model.scaffold412.16756,evm.model.scaffold247.13101,evm.model.scaff…
Biological process	lymphocyte differentiation	GO:0030098	0.086629	46	531	0.000101867	0.00246156	46	1.78926	evm.model.scaffold320.14682,evm.model.scaffold465.17498,evm.model.scaffold257.13419,evm.model.scaffold62.6004,evm.model.scaffold450.17285,evm.model.scaffold444.17178,evm.model.scaffold367.15739,evm.model.scaffold80.7030,evm.model.scaffold693.20101,evm.model.scaffold59.5863,evm.model.scaffold48.4348,evm.model.scaffold39.3591,evm.model.scaffold394.16320,evm.model.scaffold120.9081,evm.model.scaffold…
Biological process	locomotion	GO:0040011	0.308851	164	531	0.000104984	0.00252995	164	1.29505	evm.model.scaffold30.2966,evm.model.scaffold233.12647,evm.model.scaffold298.14290,evm.model.scaffold120.9126,evm.model.scaffold17.1782,evm.model.scaffold926.21746,evm.model.scaffold320.14682,evm.model.scaffold69.6333,evm.model.scaffold564.18774,evm.model.scaffold69.6332,evm.model.scaffold564.18771,evm.model.scaffold375.15950,evm.model.scaffold778.20743,evm.model.scaffold375.15952,evm.model.scaffo…
Biological process	respiratory tube development	GO:0030323	0.0564972	30	531	0.000105868	0.00254428	30	2.11208	evm.model.scaffold233.12647,evm.model.scaffold564.18774,evm.model.scaffold1229.23004,evm.model.scaffold63.6075,evm.model.scaffold62.6004,evm.model.scaffold83.7126,evm.model.scaffold118.8991,evm.model.scaffold127.9368,evm.model.scaffold21.2089,evm.model.scaffold27.2685,evm.model.scaffold101.8201,evm.model.scaffold26.2622,evm.model.scaffold14.1522,evm.model.scaffold783.20810,evm.model.scaffold12.11…
Biological process	neuron migration	GO:0001764	0.0546139	29	531	0.000109504	0.00262452	29	2.14027	evm.model.scaffold17.1782,evm.model.scaffold63.6075,evm.model.scaffold444.17178,evm.model.scaffold127.9382,evm.model.scaffold4.389,evm.model.scaffold148.10294,evm.model.scaffold1122.22625,evm.model.scaffold783.20810,evm.model.scaffold3.276,evm.model.scaffold1115.22607,evm.model.scaffold265.13610,evm.model.scaffold544.18544,evm.model.scaffold1222.22985,evm.model.scaffold638.19692,evm.model.scaffol…
Biological process	membrane raft assembly	GO:0001765	0.0112994	6	531	0.000111126	0.00265617	6	7.58893	evm.model.scaffold390.16245,evm.model.scaffold408.16694,evm.model.scaffold48.4353,evm.model.scaffold792.20877,evm.model.scaffold340.15060,evm.model.scaffold340.15061,
Biological process	calcium ion transmembrane transport	GO:0070588	0.0677966	36	531	0.000115543	0.00275429	36	1.9476	evm.model.scaffold233.12647,evm.model.scaffold426.16937,evm.model.scaffold755.20553,evm.model.scaffold865.21421,evm.model.scaffold39.3589,evm.model.scaffold182.11288,evm.model.scaffold538.18475,evm.model.scaffold26.2622,evm.model.scaffold454.17353,evm.model.scaffold783.20810,evm.model.scaffold108.8545,evm.model.scaffold12.1152,evm.model.scaffold313.14534,evm.model.scaffold265.13610,evm.model.scaf…
Biological process	negative regulation of toll-like receptor signaling pathway	GO:0034122	0.0207156	11	531	0.000115689	0.00275035	11	3.91727	evm.model.scaffold465.17498,evm.model.scaffold444.17178,evm.model.scaffold113.8721,evm.model.scaffold538.18475,evm.model.scaffold1432.23535,evm.model.scaffold8.878,evm.model.scaffold373.15916,evm.model.scaffold667.19884,evm.model.scaffold12.1329,evm.model.scaffold227.12492,evm.model.scaffold79.6968,
Biological process	cardiac muscle cell proliferation	GO:0060038	0.0225989	12	531	0.000117628	0.00278891	12	3.63767	evm.model.scaffold1727.23994,evm.model.scaffold524.18311,evm.model.scaffold127.9368,evm.model.scaffold166.10795,evm.model.scaffold45.4005,evm.model.scaffold311.14510,evm.model.scaffold20.2014,evm.model.scaffold101.8256,evm.model.scaffold980.22013,evm.model.scaffold95.7944,evm.model.scaffold840.21251,evm.model.scaffold234.12776,
Biological process	negative regulation of apoptotic process	GO:0043066	0.171375	91	531	0.000117777	0.00278498	91	1.46269	evm.model.scaffold30.2966,evm.model.scaffold120.9126,evm.model.scaffold564.18771,evm.model.scaffold117.8847,evm.model.scaffold227.12504,evm.model.scaffold257.13419,evm.model.scaffold1018.22191,evm.model.scaffold1141.22698,evm.model.scaffold450.17285,evm.model.scaffold444.17178,evm.model.scaffold367.15739,evm.model.scaffold89.7664,evm.model.scaffold280.14000,evm.model.scaffold422.16882,evm.model.s…
Biological process	negative regulation of developmental growth	GO:0048640	0.047081	25	531	0.000121383	0.00286257	25	2.28109	evm.model.scaffold1727.23994,evm.model.scaffold63.6075,evm.model.scaffold524.18311,evm.model.scaffold459.17451,evm.model.scaffold148.10294,evm.model.scaffold148.10260,evm.model.scaffold247.13101,evm.model.scaffold3.276,evm.model.scaffold351.15333,evm.model.scaffold20.2014,evm.model.scaffold290.14172,evm.model.scaffold250.13244,evm.model.scaffold101.8256,evm.model.scaffold638.19692,evm.model.scaff…
Biological process	protein localization to extracellular region	GO:0071692	0.105461	56	531	0.000122128	0.00287245	56	1.66591	evm.model.scaffold233.12647,evm.model.scaffold77.6782,evm.model.scaffold926.21746,evm.model.scaffold778.20743,evm.model.scaffold1204.22913,evm.model.scaffold121.9181,evm.model.scaffold422.16882,evm.model.scaffold408.16694,evm.model.scaffold82.7109,evm.model.scaffold685.20043,evm.model.scaffold182.11288,evm.model.scaffold57.5666,evm.model.scaffold166.10795,evm.model.scaffold12.1294,evm.model.scaff…
Biological process	ear morphogenesis	GO:0042471	0.0433145	23	531	0.000123453	0.00289589	23	2.37644	evm.model.scaffold320.14682,evm.model.scaffold142.10011,evm.model.scaffold30.2989,evm.model.scaffold755.20553,evm.model.scaffold118.8991,evm.model.scaffold127.9368,evm.model.scaffold699.20193,evm.model.scaffold59.5863,evm.model.scaffold170.10903,evm.model.scaffold685.20043,evm.model.scaffold21.2089,evm.model.scaffold666.19878,evm.model.scaffold290.14172,evm.model.scaffold638.19688,evm.model.scaff…
Biological process	programmed cell death	GO:0012501	0.312618	166	531	0.00012535	0.0029326	166	1.28783	evm.model.scaffold30.2966,evm.model.scaffold77.6782,evm.model.scaffold298.14290,evm.model.scaffold201.11761,evm.model.scaffold120.9126,evm.model.scaffold17.1782,evm.model.scaffold465.17498,evm.model.scaffold564.18771,evm.model.scaffold375.15950,evm.model.scaffold117.8847,evm.model.scaffold227.12504,evm.model.scaffold257.13419,evm.model.scaffold1018.22191,evm.model.scaffold668.19893,evm.model.scaf…
Biological process	melanocyte differentiation	GO:0030318	0.0207156	11	531	0.000126252	0.00294587	11	3.8796	evm.model.scaffold30.2966,evm.model.scaffold233.12648,evm.model.scaffold564.18771,evm.model.scaffold450.17285,evm.model.scaffold704.20212,evm.model.scaffold108.8545,evm.model.scaffold934.21786,evm.model.scaffold292.14185,evm.model.scaffold531.18409,evm.model.scaffold294.14213,evm.model.scaffold25.2562,
Biological process	positive regulation of response to wounding	GO:1903036	0.0320151	17	531	0.000132233	0.00307728	17	2.80882	evm.model.scaffold17.1782,evm.model.scaffold69.6292,evm.model.scaffold384.16141,evm.model.scaffold45.4005,evm.model.scaffold384.16138,evm.model.scaffold290.14172,evm.model.scaffold1222.22985,evm.model.scaffold593.19156,evm.model.scaffold162.10694,evm.model.scaffold191.11537,evm.model.scaffold191.11538,evm.model.scaffold351.15266,evm.model.scaffold260.13495,evm.model.scaffold43.3904,evm.model.scaf…
Biological process	peptidyl-tyrosine phosphorylation	GO:0018108	0.0734463	39	531	0.000134055	0.00311149	39	1.87485	evm.model.scaffold233.12647,evm.model.scaffold77.6782,evm.model.scaffold668.19893,evm.model.scaffold113.8721,evm.model.scaffold127.9368,evm.model.scaffold685.20043,evm.model.scaffold394.16320,evm.model.scaffold57.5666,evm.model.scaffold37.3511,evm.model.scaffold12.1294,evm.model.scaffold20.2039,evm.model.scaffold12.1145,evm.model.scaffold414.16778,evm.model.scaffold313.14534,evm.model.scaffold435…
Biological process	protein modification process	GO:0036211	0.40678	216	531	0.000134823	0.00312109	216	1.22759	evm.model.scaffold1727.23994,evm.model.scaffold233.12647,evm.model.scaffold77.6782,evm.model.scaffold469.17610,evm.model.scaffold298.14290,evm.model.scaffold306.14449,evm.model.scaffold926.21746,evm.model.scaffold390.16245,evm.model.scaffold233.12648,evm.model.scaffold255.13354,evm.model.scaffold69.6333,evm.model.scaffold465.17498,evm.model.scaffold516.18216,evm.model.scaffold564.18774,evm.model.…
Biological process	negative regulation of cardiac muscle cell proliferation	GO:0060044	0.0112994	6	531	0.000135732	0.00313391	6	7.33597	evm.model.scaffold1727.23994,evm.model.scaffold524.18311,evm.model.scaffold20.2014,evm.model.scaffold101.8256,evm.model.scaffold980.22013,evm.model.scaffold95.7944,
Biological process	semicircular canal morphogenesis	GO:0048752	0.0112994	6	531	0.000135732	0.00313391	6	7.33597	evm.model.scaffold320.14682,evm.model.scaffold685.20043,evm.model.scaffold1.32,evm.model.scaffold25.2562,evm.model.scaffold840.21251,evm.model.scaffold241.12997,
Biological process	positive regulation of protein metabolic process	GO:0051247	0.224105	119	531	0.00013885	0.0031892	119	1.37175	evm.model.scaffold1727.23994,evm.model.scaffold233.12647,evm.model.scaffold390.16245,evm.model.scaffold564.18771,evm.model.scaffold227.12504,evm.model.scaffold516.18218,evm.model.scaffold1018.22191,evm.model.scaffold429.16970,evm.model.scaffold63.6075,evm.model.scaffold668.19893,evm.model.scaffold1204.22913,evm.model.scaffold450.17285,evm.model.scaffold113.8721,evm.model.scaffold123.9227,evm.mode…
Biological process	neuron projection development	GO:0031175	0.276836	147	531	0.000139884	0.00320462	147	1.31479	evm.model.scaffold233.12647,evm.model.scaffold77.6782,evm.model.scaffold298.14290,evm.model.scaffold120.9126,evm.model.scaffold17.1782,evm.model.scaffold926.21746,evm.model.scaffold69.6333,evm.model.scaffold516.18216,evm.model.scaffold69.6332,evm.model.scaffold375.15952,evm.model.scaffold117.8847,evm.model.scaffold257.13419,evm.model.scaffold688.20066,evm.model.scaffold63.6075,evm.model.scaffold6…
Biological process	peptidyl-tyrosine modification	GO:0018212	0.0734463	39	531	0.000141487	0.00323295	39	1.86995	evm.model.scaffold233.12647,evm.model.scaffold77.6782,evm.model.scaffold668.19893,evm.model.scaffold113.8721,evm.model.scaffold127.9368,evm.model.scaffold685.20043,evm.model.scaffold394.16320,evm.model.scaffold57.5666,evm.model.scaffold37.3511,evm.model.scaffold12.1294,evm.model.scaffold20.2039,evm.model.scaffold12.1145,evm.model.scaffold414.16778,evm.model.scaffold313.14534,evm.model.scaffold435…
Biological process	bone mineralization	GO:0030282	0.0433145	23	531	0.000145631	0.00331904	23	2.34996	evm.model.scaffold233.12647,evm.model.scaffold233.12648,evm.model.scaffold564.18774,evm.model.scaffold429.16970,evm.model.scaffold121.9181,evm.model.scaffold755.20553,evm.model.scaffold360.15477,evm.model.scaffold685.20043,evm.model.scaffold384.16141,evm.model.scaffold384.16138,evm.model.scaffold14.1522,evm.model.scaffold351.15211,evm.model.scaffold373.15916,evm.model.scaffold934.21786,evm.model.…
Biological process	homophilic cell adhesion via plasma membrane adhesion molecules	GO:0007156	0.0376648	20	531	0.000147474	0.00335237	20	2.52964	evm.model.scaffold926.21746,evm.model.scaffold524.18311,evm.model.scaffold121.9181,evm.model.scaffold39.3591,evm.model.scaffold311.14510,evm.model.scaffold1115.22607,evm.model.scaffold265.13610,evm.model.scaffold265.13608,evm.model.scaffold265.13609,evm.model.scaffold42.3889,evm.model.scaffold341.15082,evm.model.scaffold224.12439,evm.model.scaffold980.22013,evm.model.scaffold227.12492,evm.model.s…
Biological process	immune system development	GO:0002520	0.19209	102	531	0.000149021	0.00337883	102	1.41557	evm.model.scaffold1727.23994,evm.model.scaffold77.6782,evm.model.scaffold120.9126,evm.model.scaffold390.16245,evm.model.scaffold320.14682,evm.model.scaffold69.6333,evm.model.scaffold465.17498,evm.model.scaffold564.18774,evm.model.scaffold69.6332,evm.model.scaffold564.18771,evm.model.scaffold375.15950,evm.model.scaffold11.1075,evm.model.scaffold257.13419,evm.model.scaffold177.11091,evm.model.scaff…
Biological process	regulation of chondrocyte differentiation	GO:0032330	0.0244821	13	531	0.000150497	0.00340356	13	3.33453	evm.model.scaffold30.2966,evm.model.scaffold233.12647,evm.model.scaffold255.13354,evm.model.scaffold62.6004,evm.model.scaffold80.7030,evm.model.scaffold685.20043,evm.model.scaffold14.1522,evm.model.scaffold75.6618,evm.model.scaffold351.15211,evm.model.scaffold466.17527,evm.model.scaffold18.1886,evm.model.scaffold308.14483,evm.model.scaffold25.2562,
Biological process	nephron development	GO:0072006	0.0508475	27	531	0.000153394	0.0034602	27	2.16708	evm.model.scaffold30.2966,evm.model.scaffold120.9126,evm.model.scaffold63.6075,evm.model.scaffold668.19893,evm.model.scaffold685.20043,evm.model.scaffold42.3806,evm.model.scaffold57.5666,evm.model.scaffold538.18475,evm.model.scaffold101.8201,evm.model.scaffold45.4005,evm.model.scaffold435.17065,evm.model.scaffold811.21044,evm.model.scaffold373.15916,evm.model.scaffold298.14312,evm.model.scaffold4…
Biological process	regulation of glial cell differentiation	GO:0045685	0.0282486	15	531	0.00015415	0.00346837	15	3.00655	evm.model.scaffold17.1782,evm.model.scaffold311.14510,evm.model.scaffold391.16267,evm.model.scaffold351.15333,evm.model.scaffold20.2014,evm.model.scaffold138.9856,evm.model.scaffold1222.22985,evm.model.scaffold638.19692,evm.model.scaffold435.17081,evm.model.scaffold224.12439,evm.model.scaffold12.1329,evm.model.scaffold1088.22456,evm.model.scaffold260.13495,evm.model.scaffold28.2738,evm.model.scaf…
Biological process	mesonephros development	GO:0001823	0.0376648	20	531	0.000154433	0.0034659	20	2.52095	evm.model.scaffold30.2966,evm.model.scaffold120.9126,evm.model.scaffold63.6075,evm.model.scaffold127.9368,evm.model.scaffold80.7030,evm.model.scaffold685.20043,evm.model.scaffold21.2089,evm.model.scaffold42.3806,evm.model.scaffold538.18475,evm.model.scaffold45.4005,evm.model.scaffold435.17065,evm.model.scaffold373.15916,evm.model.scaffold134.9699,evm.model.scaffold466.17527,evm.model.scaffold308.…
Biological process	regulation of gliogenesis	GO:0014013	0.0376648	20	531	0.000154433	0.0034659	20	2.52095	evm.model.scaffold233.12647,evm.model.scaffold17.1782,evm.model.scaffold375.15950,evm.model.scaffold546.18581,evm.model.scaffold311.14510,evm.model.scaffold391.16267,evm.model.scaffold351.15333,evm.model.scaffold20.2014,evm.model.scaffold138.9856,evm.model.scaffold1222.22985,evm.model.scaffold638.19692,evm.model.scaffold435.17081,evm.model.scaffold12.1329,evm.model.scaffold141.9977,evm.model.scaf…
Biological process	hematopoietic or lymphoid organ development	GO:0048534	0.186441	99	531	0.000155273	0.0034671	99	1.42348	evm.model.scaffold1727.23994,evm.model.scaffold77.6782,evm.model.scaffold120.9126,evm.model.scaffold390.16245,evm.model.scaffold320.14682,evm.model.scaffold69.6333,evm.model.scaffold465.17498,evm.model.scaffold564.18774,evm.model.scaffold69.6332,evm.model.scaffold564.18771,evm.model.scaffold375.15950,evm.model.scaffold11.1075,evm.model.scaffold257.13419,evm.model.scaffold177.11091,evm.model.scaff…
Biological process	immune response	GO:0006955	0.297552	158	531	0.000157765	0.00351386	158	1.29391	evm.model.scaffold30.2966,evm.model.scaffold233.12647,evm.model.scaffold77.6782,evm.model.scaffold469.17610,evm.model.scaffold306.14449,evm.model.scaffold17.1782,evm.model.scaffold233.12648,evm.model.scaffold320.14682,evm.model.scaffold69.6333,evm.model.scaffold465.17498,evm.model.scaffold778.20743,evm.model.scaffold1229.23004,evm.model.scaffold375.15952,evm.model.scaffold257.13419,evm.model.scaf…
Biological process	neural crest cell differentiation	GO:0014033	0.0357815	19	531	0.000157775	0.00350524	19	2.59077	evm.model.scaffold120.9126,evm.model.scaffold564.18771,evm.model.scaffold35.3322,evm.model.scaffold63.6075,evm.model.scaffold118.8991,evm.model.scaffold685.20043,evm.model.scaffold45.4005,evm.model.scaffold108.8545,evm.model.scaffold435.17065,evm.model.scaffold602.19247,evm.model.scaffold41.3754,evm.model.scaffold156.10549,evm.model.scaffold95.7944,evm.model.scaffold248.13157,evm.model.scaffold25…
Biological process	detection of abiotic stimulus	GO:0009582	0.0546139	29	531	0.0001593	0.00353022	29	2.09393	evm.model.scaffold17.1782,evm.model.scaffold926.21746,evm.model.scaffold375.15952,evm.model.scaffold142.10011,evm.model.scaffold30.2989,evm.model.scaffold426.16937,evm.model.scaffold755.20553,evm.model.scaffold195.11636,evm.model.scaffold89.7664,evm.model.scaffold280.14000,evm.model.scaffold755.20573,evm.model.scaffold170.10903,evm.model.scaffold705.20217,evm.model.scaffold165.10782,evm.model.sca…
Biological process	neural crest cell migration	GO:0001755	0.0244821	13	531	0.000161404	0.00356789	13	3.31138	evm.model.scaffold120.9126,evm.model.scaffold564.18771,evm.model.scaffold35.3322,evm.model.scaffold63.6075,evm.model.scaffold45.4005,evm.model.scaffold108.8545,evm.model.scaffold435.17065,evm.model.scaffold602.19247,evm.model.scaffold156.10549,evm.model.scaffold25.2562,evm.model.scaffold840.21251,evm.model.scaffold85.7227,evm.model.scaffold85.7218,
Biological process	cellular response to BMP stimulus	GO:0071773	0.0489642	26	531	0.000162509	0.00358332	26	2.19741	evm.model.scaffold30.2966,evm.model.scaffold233.12647,evm.model.scaffold469.17610,evm.model.scaffold564.18774,evm.model.scaffold688.20066,evm.model.scaffold1430.23528,evm.model.scaffold59.5863,evm.model.scaffold685.20043,evm.model.scaffold459.17451,evm.model.scaffold166.10795,evm.model.scaffold338.15039,evm.model.scaffold414.16778,evm.model.scaffold86.7243,evm.model.scaffold250.13244,evm.model.sc…
Biological process	positive regulation of cytosolic calcium ion concentration	GO:0007204	0.0564972	30	531	0.000162958	0.00358426	30	2.06067	evm.model.scaffold17.1782,evm.model.scaffold564.18771,evm.model.scaffold778.20743,evm.model.scaffold429.16970,evm.model.scaffold426.16937,evm.model.scaffold121.9181,evm.model.scaffold1579.23795,evm.model.scaffold59.5863,evm.model.scaffold170.10903,evm.model.scaffold10.1052,evm.model.scaffold538.18475,evm.model.scaffold108.8545,evm.model.scaffold313.14534,evm.model.scaffold48.4287,evm.model.scaffo…
Biological process	mesenchymal stem cell differentiation	GO:0072497	0.0094162	5	531	0.000163179	0.0035802	5	9.16996	evm.model.scaffold59.5863,evm.model.scaffold14.1522,evm.model.scaffold75.6618,evm.model.scaffold351.15211,evm.model.scaffold354.15371,
Biological process	formation of primary germ layer	GO:0001704	0.0451977	24	531	0.000165582	0.00362389	24	2.28061	evm.model.scaffold69.6332,evm.model.scaffold142.10011,evm.model.scaffold30.2989,evm.model.scaffold63.6075,evm.model.scaffold127.9368,evm.model.scaffold491.17924,evm.model.scaffold59.5863,evm.model.scaffold459.17451,evm.model.scaffold45.4005,evm.model.scaffold414.16778,evm.model.scaffold393.16282,evm.model.scaffold403.16550,evm.model.scaffold571.18873,evm.model.scaffold298.14312,evm.model.scaffold…
Biological process	positive regulation of cell-substrate adhesion	GO:0010811	0.0451977	24	531	0.000165582	0.00362389	24	2.28061	evm.model.scaffold524.18311,evm.model.scaffold195.11633,evm.model.scaffold422.16882,evm.model.scaffold39.3591,evm.model.scaffold394.16320,evm.model.scaffold57.5666,evm.model.scaffold69.6292,evm.model.scaffold50.4591,evm.model.scaffold610.19365,evm.model.scaffold457.17402,evm.model.scaffold6.817,evm.model.scaffold290.14172,evm.model.scaffold234.12856,evm.model.scaffold980.22013,evm.model.scaffold7…
Biological process	positive regulation of cytokine production	GO:0001819	0.0922787	49	531	0.000167696	0.00365204	49	1.71499	evm.model.scaffold69.6333,evm.model.scaffold465.17498,evm.model.scaffold69.6332,evm.model.scaffold257.13419,evm.model.scaffold1018.22191,evm.model.scaffold1204.22913,evm.model.scaffold367.15739,evm.model.scaffold195.11636,evm.model.scaffold117.8888,evm.model.scaffold865.21421,evm.model.scaffold80.7030,evm.model.scaffold693.20101,evm.model.scaffold120.9152,evm.model.scaffold408.16694,evm.model.sca…
Biological process	regulation of relaxation of muscle	GO:1901077	0.0169492	9	531	0.000177935	0.00386548	9	4.46106	evm.model.scaffold926.21746,evm.model.scaffold182.11288,evm.model.scaffold26.2622,evm.model.scaffold1115.22607,evm.model.scaffold141.9977,evm.model.scaffold468.17590,evm.model.scaffold1072.22395,evm.model.scaffold543.18529,evm.model.scaffold54.5545,
Biological process	response to BMP	GO:0071772	0.0489642	26	531	0.000181167	0.00392604	26	2.18233	evm.model.scaffold30.2966,evm.model.scaffold233.12647,evm.model.scaffold469.17610,evm.model.scaffold564.18774,evm.model.scaffold688.20066,evm.model.scaffold1430.23528,evm.model.scaffold59.5863,evm.model.scaffold685.20043,evm.model.scaffold459.17451,evm.model.scaffold166.10795,evm.model.scaffold338.15039,evm.model.scaffold414.16778,evm.model.scaffold86.7243,evm.model.scaffold250.13244,evm.model.sc…
Biological process	central nervous system development	GO:0007417	0.278719	148	531	0.000184546	0.00398946	148	1.30558	evm.model.scaffold1727.23994,evm.model.scaffold233.12647,evm.model.scaffold298.14290,evm.model.scaffold201.11760,evm.model.scaffold120.9126,evm.model.scaffold17.1782,evm.model.scaffold926.21746,evm.model.scaffold233.12648,evm.model.scaffold69.6333,evm.model.scaffold69.6332,evm.model.scaffold11.1075,evm.model.scaffold688.20066,evm.model.scaffold429.16970,evm.model.scaffold574.18975,evm.model.scaff…
Biological process	insulin secretion	GO:0030073	0.0659134	35	531	0.000190385	0.00410562	35	1.91898	evm.model.scaffold233.12647,evm.model.scaffold77.6782,evm.model.scaffold1204.22913,evm.model.scaffold121.9181,evm.model.scaffold82.7109,evm.model.scaffold182.11288,evm.model.scaffold57.5666,evm.model.scaffold50.4573,evm.model.scaffold457.17406,evm.model.scaffold290.14174,evm.model.scaffold62.5967,evm.model.scaffold54.5530,evm.model.scaffold6.676,evm.model.scaffold116.8798,evm.model.scaffold116.87…
Biological process	transmission of nerve impulse	GO:0019226	0.0357815	19	531	0.000190793	0.00410438	19	2.55281	evm.model.scaffold69.6333,evm.model.scaffold69.6332,evm.model.scaffold429.16970,evm.model.scaffold89.7664,evm.model.scaffold243.13040,evm.model.scaffold3.276,evm.model.scaffold351.15333,evm.model.scaffold265.13610,evm.model.scaffold290.14172,evm.model.scaffold168.10834,evm.model.scaffold1222.22985,evm.model.scaffold234.12750,evm.model.scaffold260.13495,evm.model.scaffold28.2757,evm.model.scaffold…
Biological process	chondrocyte development	GO:0002063	0.0207156	11	531	0.000192241	0.00412545	11	3.70164	evm.model.scaffold564.18774,evm.model.scaffold142.10011,evm.model.scaffold30.2989,evm.model.scaffold160.10630,evm.model.scaffold414.16778,evm.model.scaffold86.7243,evm.model.scaffold695.20137,evm.model.scaffold18.1886,evm.model.scaffold129.9459,evm.model.scaffold25.2562,evm.model.scaffold840.21268,
Biological process	regulation of osteoblast differentiation	GO:0045667	0.039548	21	531	0.000193478	0.00414194	21	2.41466	evm.model.scaffold233.12647,evm.model.scaffold257.13419,evm.model.scaffold367.15739,evm.model.scaffold685.20043,evm.model.scaffold57.5666,evm.model.scaffold69.6292,evm.model.scaffold413.16776,evm.model.scaffold101.8201,evm.model.scaffold414.16778,evm.model.scaffold3.276,evm.model.scaffold86.7243,evm.model.scaffold466.17565,evm.model.scaffold354.15371,evm.model.scaffold308.14483,evm.model.scaffold…
Biological process	acute inflammatory response	GO:0002526	0.0489642	26	531	0.000194642	0.00415676	26	2.17238	evm.model.scaffold233.12647,evm.model.scaffold564.18771,evm.model.scaffold375.15950,evm.model.scaffold778.20743,evm.model.scaffold1018.22191,evm.model.scaffold121.9181,evm.model.scaffold195.11633,evm.model.scaffold117.8888,evm.model.scaffold865.21421,evm.model.scaffold120.9152,evm.model.scaffold578.19012,evm.model.scaffold1432.23534,evm.model.scaffold465.17515,evm.model.scaffold108.8545,evm.model…
Biological process	roof of mouth development	GO:0060021	0.0301318	16	531	0.000196293	0.0041819	16	2.82153	evm.model.scaffold564.18771,evm.model.scaffold142.10011,evm.model.scaffold30.2989,evm.model.scaffold676.19971,evm.model.scaffold62.6004,evm.model.scaffold699.20193,evm.model.scaffold59.5863,evm.model.scaffold21.2089,evm.model.scaffold338.15039,evm.model.scaffold101.8201,evm.model.scaffold50.4590,evm.model.scaffold156.10549,evm.model.scaffold638.19688,evm.model.scaffold354.15371,evm.model.scaffold…
Biological process	positive regulation of hair follicle development	GO:0051798	0.0112994	6	531	0.000197792	0.00420368	6	6.87747	evm.model.scaffold166.10795,evm.model.scaffold593.19156,evm.model.scaffold162.10694,evm.model.scaffold191.11537,evm.model.scaffold191.11538,evm.model.scaffold840.21268,
Biological process	regulation of osteoblast proliferation	GO:0033688	0.0131827	7	531	0.000198812	0.0042152	7	5.70575	evm.model.scaffold685.20043,evm.model.scaffold57.5666,evm.model.scaffold3.276,evm.model.scaffold593.19156,evm.model.scaffold162.10694,evm.model.scaffold191.11537,evm.model.scaffold191.11538,
Biological process	wound healing, spreading of epidermal cells	GO:0035313	0.0131827	7	531	0.000198812	0.0042152	7	5.70575	evm.model.scaffold142.10011,evm.model.scaffold30.2989,evm.model.scaffold101.8201,evm.model.scaffold50.4590,evm.model.scaffold321.14713,evm.model.scaffold78.6910,evm.model.scaffold840.21268,
Biological process	regulation of fat cell differentiation	GO:0045598	0.0357815	19	531	0.000199939	0.00421881	19	2.54349	evm.model.scaffold298.14290,evm.model.scaffold233.12648,evm.model.scaffold121.9181,evm.model.scaffold80.7030,evm.model.scaffold10.1051,evm.model.scaffold57.5666,evm.model.scaffold414.16778,evm.model.scaffold39.3607,evm.model.scaffold48.4287,evm.model.scaffold50.4555,evm.model.scaffold571.18873,evm.model.scaffold248.13205,evm.model.scaffold466.17565,evm.model.scaffold75.6653,evm.model.scaffold6.79…
Biological process	regulation of morphogenesis of a branching structure	GO:0060688	0.0225989	12	531	0.000200825	0.00422738	12	3.43874	evm.model.scaffold120.9126,evm.model.scaffold1141.22698,evm.model.scaffold127.9368,evm.model.scaffold685.20043,evm.model.scaffold538.18475,evm.model.scaffold108.8545,evm.model.scaffold435.17065,evm.model.scaffold373.15916,evm.model.scaffold1608.23837,evm.model.scaffold71.6509,evm.model.scaffold79.6968,evm.model.scaffold541.18503,
Biological process	learning	GO:0007612	0.0583804	31	531	0.000205785	0.00432148	31	2.00542	evm.model.scaffold298.14290,evm.model.scaffold778.20743,evm.model.scaffold117.8847,evm.model.scaffold668.19893,evm.model.scaffold83.7126,evm.model.scaffold170.10903,evm.model.scaffold182.11288,evm.model.scaffold538.18475,evm.model.scaffold73.6573,evm.model.scaffold705.20217,evm.model.scaffold783.20810,evm.model.scaffold3.276,evm.model.scaffold313.14534,evm.model.scaffold265.13610,evm.model.scaffo…
Biological process	regulation of collateral sprouting	GO:0048670	0.0207156	11	531	0.000208453	0.00436712	11	3.66798	evm.model.scaffold247.13101,evm.model.scaffold586.19075,evm.model.scaffold290.14172,evm.model.scaffold250.13244,evm.model.scaffold1222.22985,evm.model.scaffold101.8256,evm.model.scaffold31.3079,evm.model.scaffold227.12492,evm.model.scaffold260.13495,evm.model.scaffold747.20514,evm.model.scaffold513.18193,
Biological process	calcium ion export across plasma membrane	GO:1990034	0.0094162	5	531	0.000209398	0.00437651	5	8.7333	evm.model.scaffold755.20553,evm.model.scaffold783.20810,evm.model.scaffold6.819,evm.model.scaffold333.14976,evm.model.scaffold333.14978,
Biological process	cardiac conduction	GO:0061337	0.0376648	20	531	0.000211792	0.00441609	20	2.46173	evm.model.scaffold69.6333,evm.model.scaffold69.6332,evm.model.scaffold524.18311,evm.model.scaffold755.20553,evm.model.scaffold491.17924,evm.model.scaffold182.11288,evm.model.scaffold26.2622,evm.model.scaffold165.10758,evm.model.scaffold689.20074,evm.model.scaffold141.9977,evm.model.scaffold980.22013,evm.model.scaffold891.21560,evm.model.scaffold6.779,evm.model.scaffold333.14976,evm.model.scaffold…
Biological process	synaptic transmission, glutamatergic	GO:0035249	0.0338983	18	531	0.000213224	0.00443546	18	2.60963	evm.model.scaffold298.14290,evm.model.scaffold89.7664,evm.model.scaffold39.3591,evm.model.scaffold21.2089,evm.model.scaffold705.20217,evm.model.scaffold677.19974,evm.model.scaffold3.276,evm.model.scaffold811.21042,evm.model.scaffold265.13610,evm.model.scaffold42.3889,evm.model.scaffold16.1696,evm.model.scaffold88.7384,evm.model.scaffold258.13473,evm.model.scaffold258.13472,evm.model.scaffold90.76…
Biological process	negative regulation of programmed cell death	GO:0043069	0.171375	91	531	0.000216044	0.00448354	91	1.4375	evm.model.scaffold30.2966,evm.model.scaffold120.9126,evm.model.scaffold564.18771,evm.model.scaffold117.8847,evm.model.scaffold227.12504,evm.model.scaffold257.13419,evm.model.scaffold1018.22191,evm.model.scaffold1141.22698,evm.model.scaffold450.17285,evm.model.scaffold444.17178,evm.model.scaffold367.15739,evm.model.scaffold89.7664,evm.model.scaffold280.14000,evm.model.scaffold422.16882,evm.model.s…
Biological process	collateral sprouting	GO:0048668	0.0225989	12	531	0.000216059	0.00447332	12	3.41208	evm.model.scaffold247.13101,evm.model.scaffold586.19075,evm.model.scaffold290.14172,evm.model.scaffold250.13244,evm.model.scaffold1222.22985,evm.model.scaffold101.8256,evm.model.scaffold31.3079,evm.model.scaffold227.12492,evm.model.scaffold260.13495,evm.model.scaffold1059.22353,evm.model.scaffold747.20514,evm.model.scaffold513.18193,
Biological process	positive regulation of nitrogen compound metabolic process	GO:0051173	0.374765	199	531	0.00021647	0.00447134	199	1.23528	evm.model.scaffold1727.23994,evm.model.scaffold233.12647,evm.model.scaffold298.14290,evm.model.scaffold120.9126,evm.model.scaffold390.16245,evm.model.scaffold465.17498,evm.model.scaffold564.18774,evm.model.scaffold564.18771,evm.model.scaffold375.15950,evm.model.scaffold778.20743,evm.model.scaffold35.3322,evm.model.scaffold11.1075,evm.model.scaffold227.12504,evm.model.scaffold257.13419,evm.model.s…
Biological process	positive regulation of morphogenesis of an epithelium	GO:1905332	0.0169492	9	531	0.000218592	0.00450462	9	4.34367	evm.model.scaffold120.9126,evm.model.scaffold1141.22698,evm.model.scaffold685.20043,evm.model.scaffold538.18475,evm.model.scaffold108.8545,evm.model.scaffold435.17065,evm.model.scaffold373.15916,evm.model.scaffold79.6968,evm.model.scaffold104.8408,
Biological process	cell fate commitment	GO:0045165	0.0809793	43	531	0.000221706	0.00455816	43	1.7682	evm.model.scaffold465.17498,evm.model.scaffold62.6004,evm.model.scaffold1141.22698,evm.model.scaffold127.9368,evm.model.scaffold699.20193,evm.model.scaffold59.5863,evm.model.scaffold298.14273,evm.model.scaffold37.3511,evm.model.scaffold243.13040,evm.model.scaffold101.8201,evm.model.scaffold50.4590,evm.model.scaffold45.4005,evm.model.scaffold414.16778,evm.model.scaffold108.8545,evm.model.scaffold8…
Biological process	regulation of biomineral tissue development	GO:0070167	0.0320151	17	531	0.000224049	0.0045956	17	2.68775	evm.model.scaffold233.12647,evm.model.scaffold233.12648,evm.model.scaffold810.21038,evm.model.scaffold429.16970,evm.model.scaffold121.9181,evm.model.scaffold755.20553,evm.model.scaffold685.20043,evm.model.scaffold14.1522,evm.model.scaffold351.15211,evm.model.scaffold18.1886,evm.model.scaffold308.14483,evm.model.scaffold484.17805,evm.model.scaffold275.13884,evm.model.scaffold333.14976,evm.model.sc…
Biological process	regulation of muscle cell differentiation	GO:0051147	0.0451977	24	531	0.000224808	0.00460047	24	2.23431	evm.model.scaffold233.12647,evm.model.scaffold257.13419,evm.model.scaffold367.15739,evm.model.scaffold59.5863,evm.model.scaffold39.3591,evm.model.scaffold685.20043,evm.model.scaffold21.2089,evm.model.scaffold223.12409,evm.model.scaffold243.13040,evm.model.scaffold465.17515,evm.model.scaffold571.18873,evm.model.scaffold1608.23837,evm.model.scaffold42.3889,evm.model.scaffold101.8256,evm.model.scaff…
Biological process	negative regulation of wound healing	GO:0061045	0.0357815	19	531	0.000229723	0.00469017	19	2.51595	evm.model.scaffold30.2966,evm.model.scaffold390.16245,evm.model.scaffold450.17285,evm.model.scaffold121.9181,evm.model.scaffold422.16882,evm.model.scaffold117.8888,evm.model.scaffold1653.23894,evm.model.scaffold1432.23534,evm.model.scaffold321.14713,evm.model.scaffold290.14172,evm.model.scaffold141.9977,evm.model.scaffold351.15266,evm.model.scaffold617.19449,evm.model.scaffold466.17527,evm.model.…
Biological process	positive regulation of endothelial cell migration	GO:0010595	0.0320151	17	531	0.000235731	0.00480172	17	2.67621	evm.model.scaffold524.18311,evm.model.scaffold127.9382,evm.model.scaffold127.9368,evm.model.scaffold27.2685,evm.model.scaffold69.6292,evm.model.scaffold101.8201,evm.model.scaffold50.4590,evm.model.scaffold45.4005,evm.model.scaffold412.16756,evm.model.scaffold393.16282,evm.model.scaffold39.3604,evm.model.scaffold156.10553,evm.model.scaffold980.22013,evm.model.scaffold71.6509,evm.model.scaffold744.…
Biological process	regulation of biomineralization	GO:0110149	0.0320151	17	531	0.000235731	0.00480172	17	2.67621	evm.model.scaffold233.12647,evm.model.scaffold233.12648,evm.model.scaffold810.21038,evm.model.scaffold429.16970,evm.model.scaffold121.9181,evm.model.scaffold755.20553,evm.model.scaffold685.20043,evm.model.scaffold14.1522,evm.model.scaffold351.15211,evm.model.scaffold18.1886,evm.model.scaffold308.14483,evm.model.scaffold484.17805,evm.model.scaffold275.13884,evm.model.scaffold333.14976,evm.model.sc…
Biological process	protection from natural killer cell mediated cytotoxicity	GO:0042270	0.0112994	6	531	0.000236228	0.00478973	6	6.66906	evm.model.scaffold792.20877,evm.model.scaffold12.1294,evm.model.scaffold465.17518,evm.model.scaffold617.19445,evm.model.scaffold1827.24084,evm.model.scaffold1523.23716,
Biological process	actin filament-based movement	GO:0030048	0.047081	25	531	0.000238196	0.00481855	25	2.18332	evm.model.scaffold926.21746,evm.model.scaffold177.11091,evm.model.scaffold491.17924,evm.model.scaffold182.11288,evm.model.scaffold243.13040,evm.model.scaffold1122.22625,evm.model.scaffold26.2622,evm.model.scaffold465.17515,evm.model.scaffold1115.22607,evm.model.scaffold689.20074,evm.model.scaffold544.18544,evm.model.scaffold531.18409,evm.model.scaffold24.2315,evm.model.scaffold141.9977,evm.model.…
Biological process	epithelial to mesenchymal transition	GO:0001837	0.0414313	22	531	0.000243185	0.00490821	22	2.31884	evm.model.scaffold255.13354,evm.model.scaffold35.3322,evm.model.scaffold257.13419,evm.model.scaffold62.6004,evm.model.scaffold367.15739,evm.model.scaffold127.9368,evm.model.scaffold685.20043,evm.model.scaffold166.10795,evm.model.scaffold414.16778,evm.model.scaffold602.19247,evm.model.scaffold321.14713,evm.model.scaffold248.13205,evm.model.scaffold234.12856,evm.model.scaffold41.3754,evm.model.scaf…
Biological process	regulation of bone mineralization	GO:0030500	0.0301318	16	531	0.000243796	0.00490932	16	2.76829	evm.model.scaffold233.12647,evm.model.scaffold233.12648,evm.model.scaffold429.16970,evm.model.scaffold121.9181,evm.model.scaffold755.20553,evm.model.scaffold685.20043,evm.model.scaffold14.1522,evm.model.scaffold351.15211,evm.model.scaffold18.1886,evm.model.scaffold308.14483,evm.model.scaffold484.17805,evm.model.scaffold275.13884,evm.model.scaffold333.14976,evm.model.scaffold333.14978,evm.model.sc…
Biological process	smooth muscle cell differentiation	GO:0051145	0.0225989	12	531	0.000249496	0.00501266	12	3.35999	evm.model.scaffold564.18771,evm.model.scaffold257.13419,evm.model.scaffold367.15739,evm.model.scaffold120.9152,evm.model.scaffold21.2089,evm.model.scaffold101.8201,evm.model.scaffold45.4005,evm.model.scaffold108.8545,evm.model.scaffold78.6910,evm.model.scaffold6.767,evm.model.scaffold484.17805,evm.model.scaffold104.8408,
Biological process	cardiac muscle tissue morphogenesis	GO:0055008	0.0282486	15	531	0.000260642	0.00522469	15	2.86561	evm.model.scaffold926.21746,evm.model.scaffold142.10011,evm.model.scaffold30.2989,evm.model.scaffold429.16970,evm.model.scaffold491.17924,evm.model.scaffold243.13040,evm.model.scaffold45.4005,evm.model.scaffold465.17515,evm.model.scaffold1115.22607,evm.model.scaffold67.6219,evm.model.scaffold891.21560,evm.model.scaffold468.17590,evm.model.scaffold840.21251,evm.model.scaffold41.3679,evm.model.scaf…
Biological process	JNK cascade	GO:0007254	0.0451977	24	531	0.000260915	0.00521831	24	2.21185	evm.model.scaffold233.12647,evm.model.scaffold89.7664,evm.model.scaffold865.21421,evm.model.scaffold59.5863,evm.model.scaffold101.8201,evm.model.scaffold1432.23535,evm.model.scaffold50.4590,evm.model.scaffold610.19365,evm.model.scaffold414.16778,evm.model.scaffold20.2014,evm.model.scaffold368.15816,evm.model.scaffold156.10553,evm.model.scaffold466.17562,evm.model.scaffold116.8795,evm.model.scaffo…
Biological process	regulation of relaxation of cardiac muscle	GO:1901897	0.0131827	7	531	0.00026289	0.0052459	7	5.46296	evm.model.scaffold926.21746,evm.model.scaffold182.11288,evm.model.scaffold26.2622,evm.model.scaffold1115.22607,evm.model.scaffold468.17590,evm.model.scaffold543.18529,evm.model.scaffold54.5545,
Biological process	ureteric bud development	GO:0001657	0.0357815	19	531	0.000263319	0.00524261	19	2.48899	evm.model.scaffold30.2966,evm.model.scaffold120.9126,evm.model.scaffold63.6075,evm.model.scaffold127.9368,evm.model.scaffold685.20043,evm.model.scaffold21.2089,evm.model.scaffold42.3806,evm.model.scaffold538.18475,evm.model.scaffold45.4005,evm.model.scaffold435.17065,evm.model.scaffold373.15916,evm.model.scaffold134.9699,evm.model.scaffold466.17527,evm.model.scaffold308.14483,evm.model.scaffold48…
Biological process	angiogenesis involved in wound healing	GO:0060055	0.0169492	9	531	0.000266679	0.00529755	9	4.23229	evm.model.scaffold17.1782,evm.model.scaffold121.9181,evm.model.scaffold69.6292,evm.model.scaffold45.4005,evm.model.scaffold312.14524,evm.model.scaffold593.19156,evm.model.scaffold162.10694,evm.model.scaffold191.11537,evm.model.scaffold191.11538,
Biological process	cell morphogenesis	GO:0000902	0.280603	149	531	0.000267284	0.00529763	149	1.29387	evm.model.scaffold233.12647,evm.model.scaffold117.8835,evm.model.scaffold298.14290,evm.model.scaffold120.9126,evm.model.scaffold17.1782,evm.model.scaffold926.21746,evm.model.scaffold320.14682,evm.model.scaffold69.6333,evm.model.scaffold516.18216,evm.model.scaffold69.6332,evm.model.scaffold375.15952,evm.model.scaffold35.3322,evm.model.scaffold117.8847,evm.model.scaffold257.13419,evm.model.scaffold…
Biological process	branching involved in salivary gland morphogenesis	GO:0060445	0.0150659	8	531	0.000268388	0.00530759	8	4.73288	evm.model.scaffold63.6075,evm.model.scaffold127.9368,evm.model.scaffold247.13101,evm.model.scaffold1608.23837,evm.model.scaffold586.19075,evm.model.scaffold71.6509,evm.model.scaffold85.7227,evm.model.scaffold85.7218,
Biological process	fat cell differentiation	GO:0045444	0.0583804	31	531	0.000270536	0.0053381	31	1.97409	evm.model.scaffold233.12647,evm.model.scaffold298.14290,evm.model.scaffold233.12648,evm.model.scaffold63.6075,evm.model.scaffold121.9181,evm.model.scaffold80.7030,evm.model.scaffold10.1051,evm.model.scaffold57.5666,evm.model.scaffold413.16776,evm.model.scaffold148.10260,evm.model.scaffold20.2039,evm.model.scaffold414.16778,evm.model.scaffold39.3607,evm.model.scaffold48.4287,evm.model.scaffold50.4…
Biological process	cardiac muscle cell differentiation	GO:0055007	0.0433145	23	531	0.000273804	0.00539051	23	2.2497	evm.model.scaffold926.21746,evm.model.scaffold524.18311,evm.model.scaffold59.5863,evm.model.scaffold685.20043,evm.model.scaffold243.13040,evm.model.scaffold1122.22625,evm.model.scaffold465.17515,evm.model.scaffold610.19371,evm.model.scaffold313.14534,evm.model.scaffold1115.22607,evm.model.scaffold602.19247,evm.model.scaffold298.14312,evm.model.scaffold544.18544,evm.model.scaffold41.3757,evm.model…
Biological process	plasma membrane bounded cell projection morphogenesis	GO:0120039	0.220339	117	531	0.000274389	0.00539	117	1.3538	evm.model.scaffold233.12647,evm.model.scaffold298.14290,evm.model.scaffold120.9126,evm.model.scaffold17.1782,evm.model.scaffold926.21746,evm.model.scaffold69.6333,evm.model.scaffold516.18216,evm.model.scaffold69.6332,evm.model.scaffold375.15952,evm.model.scaffold117.8847,evm.model.scaffold257.13419,evm.model.scaffold688.20066,evm.model.scaffold63.6075,evm.model.scaffold668.19893,evm.model.scaffol…
Biological process	protein kinase B signaling	GO:0043491	0.0546139	29	531	0.000276481	0.00541902	29	2.02613	evm.model.scaffold564.18774,evm.model.scaffold444.17178,evm.model.scaffold113.8721,evm.model.scaffold127.9368,evm.model.scaffold865.21421,evm.model.scaffold45.4062,evm.model.scaffold69.6299,evm.model.scaffold412.16756,evm.model.scaffold414.16778,evm.model.scaffold39.3604,evm.model.scaffold8.878,evm.model.scaffold138.9856,evm.model.scaffold1608.23837,evm.model.scaffold248.13116,evm.model.scaffold1…
Biological process	cation transmembrane transport	GO:0098655	0.124294	66	531	0.000278646	0.00544935	66	1.54196	evm.model.scaffold233.12647,evm.model.scaffold117.8835,evm.model.scaffold778.20743,evm.model.scaffold426.16937,evm.model.scaffold121.9181,evm.model.scaffold755.20553,evm.model.scaffold1015.22174,evm.model.scaffold978.22000,evm.model.scaffold865.21421,evm.model.scaffold39.3589,evm.model.scaffold182.11288,evm.model.scaffold71.6458,evm.model.scaffold243.13040,evm.model.scaffold538.18475,evm.model.sc…
Biological process	elastic fiber assembly	GO:0048251	0.0112994	6	531	0.000280305	0.00546967	6	6.47291	evm.model.scaffold50.4591,evm.model.scaffold1122.22625,evm.model.scaffold14.1522,evm.model.scaffold3.276,evm.model.scaffold351.15211,evm.model.scaffold544.18544,
Biological process	protein secretion	GO:0009306	0.101695	54	531	0.00028842	0.00561559	54	1.62754	evm.model.scaffold233.12647,evm.model.scaffold77.6782,evm.model.scaffold926.21746,evm.model.scaffold778.20743,evm.model.scaffold1204.22913,evm.model.scaffold121.9181,evm.model.scaffold422.16882,evm.model.scaffold408.16694,evm.model.scaffold82.7109,evm.model.scaffold182.11288,evm.model.scaffold57.5666,evm.model.scaffold166.10795,evm.model.scaffold12.1294,evm.model.scaffold1122.22625,evm.model.scaf…
Biological process	forebrain cell migration	GO:0021885	0.0244821	13	531	0.000294166	0.00571486	13	3.11659	evm.model.scaffold17.1782,evm.model.scaffold444.17178,evm.model.scaffold783.20810,evm.model.scaffold3.276,evm.model.scaffold8.878,evm.model.scaffold265.13610,evm.model.scaffold41.3757,evm.model.scaffold667.19884,evm.model.scaffold435.17081,evm.model.scaffold224.12439,evm.model.scaffold134.9699,evm.model.scaffold617.19445,evm.model.scaffold513.18193,
Biological process	positive regulation of peptidyl-tyrosine phosphorylation	GO:0050731	0.0508475	27	531	0.000294302	0.00570494	27	2.08058	evm.model.scaffold233.12647,evm.model.scaffold668.19893,evm.model.scaffold113.8721,evm.model.scaffold685.20043,evm.model.scaffold394.16320,evm.model.scaffold57.5666,evm.model.scaffold37.3511,evm.model.scaffold12.1294,evm.model.scaffold20.2039,evm.model.scaffold12.1145,evm.model.scaffold313.14534,evm.model.scaffold435.17065,evm.model.scaffold1608.23837,evm.model.scaffold804.20968,evm.model.scaffol…
Biological process	regulation of neurotransmitter levels	GO:0001505	0.0715631	38	531	0.000295195	0.0057097	38	1.81963	evm.model.scaffold117.8835,evm.model.scaffold120.9126,evm.model.scaffold69.6333,evm.model.scaffold69.6332,evm.model.scaffold414.16785,evm.model.scaffold408.16694,evm.model.scaffold285.14102,evm.model.scaffold82.7109,evm.model.scaffold71.6458,evm.model.scaffold698.20173,evm.model.scaffold101.8201,evm.model.scaffold705.20217,evm.model.scaffold50.4590,evm.model.scaffold677.19974,evm.model.scaffold78…
Biological process	lymphocyte proliferation	GO:0046651	0.0715631	38	531	0.000295195	0.0057097	38	1.81963	evm.model.scaffold233.12647,evm.model.scaffold77.6782,evm.model.scaffold117.8847,evm.model.scaffold257.13419,evm.model.scaffold1018.22191,evm.model.scaffold450.17285,evm.model.scaffold367.15739,evm.model.scaffold360.15477,evm.model.scaffold422.16882,evm.model.scaffold865.21421,evm.model.scaffold48.4348,evm.model.scaffold792.20871,evm.model.scaffold792.20877,evm.model.scaffold394.16320,evm.model.s…
Biological process	cellular response to lithium ion	GO:0071285	0.0150659	8	531	0.000300203	0.0057812	8	4.65776	evm.model.scaffold257.13419,evm.model.scaffold524.18311,evm.model.scaffold367.15739,evm.model.scaffold243.13040,evm.model.scaffold980.22013,evm.model.scaffold641.19727,evm.model.scaffold514.18196,evm.model.scaffold112.8678,
Biological process	dendrite development	GO:0016358	0.079096	42	531	0.000300673	0.00577765	42	1.75662	evm.model.scaffold298.14290,evm.model.scaffold117.8847,evm.model.scaffold257.13419,evm.model.scaffold668.19893,evm.model.scaffold367.15739,evm.model.scaffold121.9181,evm.model.scaffold118.8991,evm.model.scaffold422.16882,evm.model.scaffold4.389,evm.model.scaffold42.3806,evm.model.scaffold394.16320,evm.model.scaffold57.5666,evm.model.scaffold37.3511,evm.model.scaffold101.8201,evm.model.scaffold705…
Biological process	axon ensheathment	GO:0008366	0.0451977	24	531	0.00030205	0.00579148	24	2.18984	evm.model.scaffold17.1782,evm.model.scaffold320.14682,evm.model.scaffold375.15950,evm.model.scaffold422.16882,evm.model.scaffold117.8888,evm.model.scaffold69.6292,evm.model.scaffold73.6573,evm.model.scaffold406.16626,evm.model.scaffold311.14510,evm.model.scaffold391.16267,evm.model.scaffold351.15333,evm.model.scaffold138.9856,evm.model.scaffold42.3889,evm.model.scaffold1222.22985,evm.model.scaffo…
Biological process	cell projection morphogenesis	GO:0048858	0.220339	117	531	0.000303377	0.00580431	117	1.35039	evm.model.scaffold233.12647,evm.model.scaffold298.14290,evm.model.scaffold120.9126,evm.model.scaffold17.1782,evm.model.scaffold926.21746,evm.model.scaffold69.6333,evm.model.scaffold516.18216,evm.model.scaffold69.6332,evm.model.scaffold375.15952,evm.model.scaffold117.8847,evm.model.scaffold257.13419,evm.model.scaffold688.20066,evm.model.scaffold63.6075,evm.model.scaffold668.19893,evm.model.scaffol…
Biological process	chemical synaptic transmission, postsynaptic	GO:0099565	0.0338983	18	531	0.000311769	0.00595195	18	2.52964	evm.model.scaffold778.20743,evm.model.scaffold429.16970,evm.model.scaffold524.18311,evm.model.scaffold89.7664,evm.model.scaffold71.6458,evm.model.scaffold101.8201,evm.model.scaffold705.20217,evm.model.scaffold50.4590,evm.model.scaffold18.1817,evm.model.scaffold290.14174,evm.model.scaffold901.21605,evm.model.scaffold980.22013,evm.model.scaffold88.7384,evm.model.scaffold90.7693,evm.model.scaffold33…
Biological process	establishment of protein localization to extracellular region	GO:0035592	0.101695	54	531	0.000312323	0.00594965	54	1.6222	evm.model.scaffold233.12647,evm.model.scaffold77.6782,evm.model.scaffold926.21746,evm.model.scaffold778.20743,evm.model.scaffold1204.22913,evm.model.scaffold121.9181,evm.model.scaffold422.16882,evm.model.scaffold408.16694,evm.model.scaffold82.7109,evm.model.scaffold182.11288,evm.model.scaffold57.5666,evm.model.scaffold166.10795,evm.model.scaffold12.1294,evm.model.scaffold1122.22625,evm.model.scaf…
Biological process	ensheathment of neurons	GO:0007272	0.0451977	24	531	0.000313187	0.00595325	24	2.18441	evm.model.scaffold17.1782,evm.model.scaffold320.14682,evm.model.scaffold375.15950,evm.model.scaffold422.16882,evm.model.scaffold117.8888,evm.model.scaffold69.6292,evm.model.scaffold73.6573,evm.model.scaffold406.16626,evm.model.scaffold311.14510,evm.model.scaffold391.16267,evm.model.scaffold351.15333,evm.model.scaffold138.9856,evm.model.scaffold42.3889,evm.model.scaffold1222.22985,evm.model.scaffo…
Biological process	regulation of endothelial cell migration	GO:0010594	0.0451977	24	531	0.000313187	0.00595325	24	2.18441	evm.model.scaffold30.2966,evm.model.scaffold524.18311,evm.model.scaffold127.9382,evm.model.scaffold123.9227,evm.model.scaffold127.9368,evm.model.scaffold27.2685,evm.model.scaffold69.6292,evm.model.scaffold101.8201,evm.model.scaffold50.4590,evm.model.scaffold45.4005,evm.model.scaffold412.16756,evm.model.scaffold12.1145,evm.model.scaffold393.16282,evm.model.scaffold39.3604,evm.model.scaffold156.105…
Biological process	regulation of cytosolic calcium ion concentration	GO:0051480	0.0244821	13	531	0.000313478	0.0059332	13	3.09635	evm.model.scaffold755.20553,evm.model.scaffold1579.23795,evm.model.scaffold783.20810,evm.model.scaffold165.10758,evm.model.scaffold340.15060,evm.model.scaffold340.15061,evm.model.scaffold54.5530,evm.model.scaffold6.676,evm.model.scaffold531.18409,evm.model.scaffold891.21560,evm.model.scaffold275.13884,evm.model.scaffold333.14976,evm.model.scaffold333.14978,
Biological process	positive regulation of kinase activity	GO:0033674	0.0922787	49	531	0.000315604	0.00596066	49	1.66881	evm.model.scaffold227.12504,evm.model.scaffold444.17178,evm.model.scaffold127.9368,evm.model.scaffold865.21421,evm.model.scaffold578.19012,evm.model.scaffold685.20043,evm.model.scaffold21.2089,evm.model.scaffold166.10795,evm.model.scaffold120.9081,evm.model.scaffold37.3511,evm.model.scaffold705.20217,evm.model.scaffold1432.23535,evm.model.scaffold12.1294,evm.model.scaffold412.16756,evm.model.scaf…
Biological process	regulation of metabolic process	GO:0019222	0.640301	340	531	0.000316003	0.00595545	340	1.12841	evm.model.scaffold1727.23994,evm.model.scaffold233.12647,evm.model.scaffold77.6782,evm.model.scaffold469.17610,evm.model.scaffold298.14290,evm.model.scaffold306.14449,evm.model.scaffold120.9126,evm.model.scaffold17.1782,evm.model.scaffold926.21746,evm.model.scaffold390.16245,evm.model.scaffold233.12648,evm.model.scaffold255.13354,evm.model.scaffold320.14682,evm.model.scaffold69.6333,evm.model.sca…
Biological process	detection of external stimulus	GO:0009581	0.0527307	28	531	0.000319963	0.00601721	28	2.03777	evm.model.scaffold17.1782,evm.model.scaffold926.21746,evm.model.scaffold375.15952,evm.model.scaffold142.10011,evm.model.scaffold30.2989,evm.model.scaffold426.16937,evm.model.scaffold755.20553,evm.model.scaffold195.11636,evm.model.scaffold89.7664,evm.model.scaffold280.14000,evm.model.scaffold755.20573,evm.model.scaffold170.10903,evm.model.scaffold705.20217,evm.model.scaffold165.10782,evm.model.sca…
Biological process	regulation of peptidyl-tyrosine phosphorylation	GO:0050730	0.0602637	32	531	0.000320589	0.00601616	32	1.93052	evm.model.scaffold233.12647,evm.model.scaffold668.19893,evm.model.scaffold113.8721,evm.model.scaffold685.20043,evm.model.scaffold394.16320,evm.model.scaffold57.5666,evm.model.scaffold37.3511,evm.model.scaffold12.1294,evm.model.scaffold20.2039,evm.model.scaffold12.1145,evm.model.scaffold414.16778,evm.model.scaffold313.14534,evm.model.scaffold435.17065,evm.model.scaffold811.21044,evm.model.scaffold…
Biological process	neurotransmitter transport	GO:0006836	0.0696798	37	531	0.000320713	0.00600571	37	1.82905	evm.model.scaffold117.8835,evm.model.scaffold120.9126,evm.model.scaffold69.6333,evm.model.scaffold69.6332,evm.model.scaffold414.16785,evm.model.scaffold457.17397,evm.model.scaffold408.16694,evm.model.scaffold285.14102,evm.model.scaffold82.7109,evm.model.scaffold71.6458,evm.model.scaffold698.20173,evm.model.scaffold101.8201,evm.model.scaffold705.20217,evm.model.scaffold50.4590,evm.model.scaffold38…
Biological process	regulation of kidney development	GO:0090183	0.0169492	9	531	0.000323214	0.00602696	9	4.12648	evm.model.scaffold120.9126,evm.model.scaffold685.20043,evm.model.scaffold538.18475,evm.model.scaffold108.8545,evm.model.scaffold435.17065,evm.model.scaffold373.15916,evm.model.scaffold308.14483,evm.model.scaffold79.6968,evm.model.scaffold104.8408,
Biological process	cellular response to organonitrogen compound	GO:0071417	0.143126	76	531	0.000324642	0.00604081	76	1.48044	evm.model.scaffold233.12647,evm.model.scaffold298.14290,evm.model.scaffold233.12648,evm.model.scaffold564.18774,evm.model.scaffold375.15950,evm.model.scaffold778.20743,evm.model.scaffold755.20553,evm.model.scaffold113.8721,evm.model.scaffold123.9227,evm.model.scaffold1015.22174,evm.model.scaffold118.8991,evm.model.scaffold422.16882,evm.model.scaffold59.5863,evm.model.scaffold508.18123,evm.model.s…
Biological process	proteoglycan metabolic process	GO:0006029	0.0263653	14	531	0.000325218	0.00603878	14	2.93439	evm.model.scaffold30.2966,evm.model.scaffold142.10011,evm.model.scaffold30.2989,evm.model.scaffold160.10630,evm.model.scaffold86.7243,evm.model.scaffold593.19156,evm.model.scaffold162.10694,evm.model.scaffold191.11537,evm.model.scaffold191.11538,evm.model.scaffold638.19688,evm.model.scaffold931.21776,evm.model.scaffold466.17527,evm.model.scaffold1418.23505,evm.model.scaffold24.2296,
Biological process	cell morphogenesis involved in differentiation	GO:0000904	0.237288	126	531	0.000325498	0.00603129	126	1.32883	evm.model.scaffold233.12647,evm.model.scaffold117.8835,evm.model.scaffold298.14290,evm.model.scaffold120.9126,evm.model.scaffold17.1782,evm.model.scaffold926.21746,evm.model.scaffold320.14682,evm.model.scaffold69.6333,evm.model.scaffold69.6332,evm.model.scaffold375.15952,evm.model.scaffold117.8847,evm.model.scaffold257.13419,evm.model.scaffold688.20066,evm.model.scaffold63.6075,evm.model.scaffold…
Biological process	mesonephric epithelium development	GO:0072163	0.0357815	19	531	0.000328897	0.00608148	19	2.44532	evm.model.scaffold30.2966,evm.model.scaffold120.9126,evm.model.scaffold63.6075,evm.model.scaffold127.9368,evm.model.scaffold685.20043,evm.model.scaffold21.2089,evm.model.scaffold42.3806,evm.model.scaffold538.18475,evm.model.scaffold45.4005,evm.model.scaffold435.17065,evm.model.scaffold373.15916,evm.model.scaffold134.9699,evm.model.scaffold466.17527,evm.model.scaffold308.14483,evm.model.scaffold48…
Biological process	mesonephric tubule development	GO:0072164	0.0357815	19	531	0.000328897	0.00608148	19	2.44532	evm.model.scaffold30.2966,evm.model.scaffold120.9126,evm.model.scaffold63.6075,evm.model.scaffold127.9368,evm.model.scaffold685.20043,evm.model.scaffold21.2089,evm.model.scaffold42.3806,evm.model.scaffold538.18475,evm.model.scaffold45.4005,evm.model.scaffold435.17065,evm.model.scaffold373.15916,evm.model.scaffold134.9699,evm.model.scaffold466.17527,evm.model.scaffold308.14483,evm.model.scaffold48…
Biological process	cardiac chamber morphogenesis	GO:0003206	0.0414313	22	531	0.000346108	0.00637301	22	2.26038	evm.model.scaffold320.14682,evm.model.scaffold35.3322,evm.model.scaffold257.13419,evm.model.scaffold142.10011,evm.model.scaffold30.2989,evm.model.scaffold367.15739,evm.model.scaffold491.17924,evm.model.scaffold59.5863,evm.model.scaffold166.10795,evm.model.scaffold243.13040,evm.model.scaffold45.4005,evm.model.scaffold610.19371,evm.model.scaffold414.16778,evm.model.scaffold764.20654,evm.model.scaff…
Biological process	mononuclear cell proliferation	GO:0032943	0.0734463	39	531	0.000348072	0.00639583	39	1.78814	evm.model.scaffold233.12647,evm.model.scaffold77.6782,evm.model.scaffold117.8847,evm.model.scaffold257.13419,evm.model.scaffold1018.22191,evm.model.scaffold450.17285,evm.model.scaffold367.15739,evm.model.scaffold360.15477,evm.model.scaffold422.16882,evm.model.scaffold865.21421,evm.model.scaffold48.4348,evm.model.scaffold792.20871,evm.model.scaffold792.20877,evm.model.scaffold394.16320,evm.model.s…
Biological process	oligodendrocyte differentiation	GO:0048709	0.0338983	18	531	0.000357824	0.00656135	18	2.5009	evm.model.scaffold17.1782,evm.model.scaffold120.9081,evm.model.scaffold406.16626,evm.model.scaffold75.6618,evm.model.scaffold311.14510,evm.model.scaffold391.16267,evm.model.scaffold351.15333,evm.model.scaffold20.2014,evm.model.scaffold138.9856,evm.model.scaffold165.10758,evm.model.scaffold1222.22985,evm.model.scaffold224.12439,evm.model.scaffold1088.22456,evm.model.scaffold260.13495,evm.model.sca…
Biological process	positive regulation of muscle cell differentiation	GO:0051149	0.0301318	16	531	0.000369351	0.00675867	16	2.66763	evm.model.scaffold39.3591,evm.model.scaffold685.20043,evm.model.scaffold21.2089,evm.model.scaffold223.12409,evm.model.scaffold243.13040,evm.model.scaffold465.17515,evm.model.scaffold571.18873,evm.model.scaffold42.3889,evm.model.scaffold101.8256,evm.model.scaffold67.6219,evm.model.scaffold133.9666,evm.model.scaffold27.2662,evm.model.scaffold468.17590,evm.model.scaffold45.3968,evm.model.scaffold104…
Biological process	response to lithium ion	GO:0010226	0.0188324	10	531	0.000369879	0.00675431	10	3.70504	evm.model.scaffold257.13419,evm.model.scaffold524.18311,evm.model.scaffold367.15739,evm.model.scaffold243.13040,evm.model.scaffold811.21042,evm.model.scaffold54.5530,evm.model.scaffold980.22013,evm.model.scaffold641.19727,evm.model.scaffold514.18196,evm.model.scaffold112.8678,
Biological process	actin-mediated cell contraction	GO:0070252	0.0414313	22	531	0.000373587	0.00680793	22	2.24779	evm.model.scaffold926.21746,evm.model.scaffold177.11091,evm.model.scaffold491.17924,evm.model.scaffold182.11288,evm.model.scaffold243.13040,evm.model.scaffold26.2622,evm.model.scaffold465.17515,evm.model.scaffold1115.22607,evm.model.scaffold689.20074,evm.model.scaffold24.2315,evm.model.scaffold141.9977,evm.model.scaffold891.21560,evm.model.scaffold6.779,evm.model.scaffold468.17590,evm.model.scaff…
Biological process	cardiac cell development	GO:0055006	0.0357815	19	531	0.000374721	0.00681452	19	2.41985	evm.model.scaffold926.21746,evm.model.scaffold524.18311,evm.model.scaffold243.13040,evm.model.scaffold1122.22625,evm.model.scaffold465.17515,evm.model.scaffold610.19371,evm.model.scaffold313.14534,evm.model.scaffold1115.22607,evm.model.scaffold298.14312,evm.model.scaffold544.18544,evm.model.scaffold41.3757,evm.model.scaffold156.10549,evm.model.scaffold67.6219,evm.model.scaffold980.22013,evm.model…
Biological process	regulation of postsynapse organization	GO:0099175	0.0376648	20	531	0.000384805	0.0069835	20	2.35127	evm.model.scaffold298.14290,evm.model.scaffold39.3591,evm.model.scaffold42.3806,evm.model.scaffold101.8201,evm.model.scaffold705.20217,evm.model.scaffold50.4590,evm.model.scaffold12.1294,evm.model.scaffold18.1817,evm.model.scaffold42.3889,evm.model.scaffold1222.22985,evm.model.scaffold901.21605,evm.model.scaffold708.20241,evm.model.scaffold31.3079,evm.model.scaffold227.12492,evm.model.scaffold24.…
Biological process	positive regulation of intracellular signal transduction	GO:1902533	0.165725	88	531	0.000387782	0.00702307	88	1.4232	evm.model.scaffold233.12647,evm.model.scaffold66.6167,evm.model.scaffold77.6782,evm.model.scaffold298.14290,evm.model.scaffold564.18774,evm.model.scaffold778.20743,evm.model.scaffold1204.22913,evm.model.scaffold444.17178,evm.model.scaffold195.11636,evm.model.scaffold113.8721,evm.model.scaffold195.11633,evm.model.scaffold360.15477,evm.model.scaffold422.16882,evm.model.scaffold127.9368,evm.model.sc…
Biological process	retina development in camera-type eye	GO:0060041	0.0564972	30	531	0.000399235	0.00721569	30	1.95452	evm.model.scaffold63.6075,evm.model.scaffold444.17178,evm.model.scaffold426.16937,evm.model.scaffold121.9181,evm.model.scaffold755.20553,evm.model.scaffold120.9152,evm.model.scaffold57.5666,evm.model.scaffold45.4005,evm.model.scaffold1122.22625,evm.model.scaffold165.10782,evm.model.scaffold86.7243,evm.model.scaffold666.19878,evm.model.scaffold393.16282,evm.model.scaffold372.15910,evm.model.scaffo…
Biological process	gastrulation	GO:0007369	0.0640301	34	531	0.000407886	0.00735696	34	1.86137	evm.model.scaffold69.6332,evm.model.scaffold142.10011,evm.model.scaffold30.2989,evm.model.scaffold429.16970,evm.model.scaffold63.6075,evm.model.scaffold127.9382,evm.model.scaffold117.8888,evm.model.scaffold127.9368,evm.model.scaffold491.17924,evm.model.scaffold408.16694,evm.model.scaffold59.5863,evm.model.scaffold685.20043,evm.model.scaffold459.17451,evm.model.scaffold57.5666,evm.model.scaffold45…
Biological process	vasculogenesis	GO:0001570	0.0301318	16	531	0.000408305	0.00734948	16	2.64359	evm.model.scaffold564.18771,evm.model.scaffold127.9382,evm.model.scaffold101.8201,evm.model.scaffold50.4590,evm.model.scaffold12.1145,evm.model.scaffold234.12856,evm.model.scaffold1222.22985,evm.model.scaffold260.13495,evm.model.scaffold275.13884,evm.model.scaffold104.8408,evm.model.scaffold840.21251,evm.model.scaffold78.6902,evm.model.scaffold85.7227,evm.model.scaffold85.7218,evm.model.scaffold2…
Biological process	negative regulation of cellular component organization	GO:0051129	0.13936	74	531	0.000408309	0.00733458	74	1.47838	evm.model.scaffold233.12647,evm.model.scaffold77.6782,evm.model.scaffold298.14290,evm.model.scaffold69.6333,evm.model.scaffold69.6332,evm.model.scaffold117.8847,evm.model.scaffold257.13419,evm.model.scaffold429.16970,evm.model.scaffold177.11091,evm.model.scaffold63.6075,evm.model.scaffold76.6728,evm.model.scaffold1141.22698,evm.model.scaffold450.17285,evm.model.scaffold367.15739,evm.model.scaffol…
Biological process	positive regulation of epithelial cell proliferation involved in wound healing	GO:0060054	0.0094162	5	531	0.000408809	0.00732865	5	7.64164	evm.model.scaffold59.5863,evm.model.scaffold101.8201,evm.model.scaffold50.4590,evm.model.scaffold312.14524,evm.model.scaffold354.15371,
Biological process	maintenance of presynaptic active zone structure	GO:0048790	0.0094162	5	531	0.000408809	0.00732865	5	7.64164	evm.model.scaffold69.6333,evm.model.scaffold69.6332,evm.model.scaffold25.2498,evm.model.scaffold41.3742,evm.model.scaffold85.7215,
Biological process	neuron projection morphogenesis	GO:0048812	0.216573	115	531	0.000409011	0.00730259	115	1.34465	evm.model.scaffold233.12647,evm.model.scaffold298.14290,evm.model.scaffold120.9126,evm.model.scaffold17.1782,evm.model.scaffold926.21746,evm.model.scaffold69.6333,evm.model.scaffold516.18216,evm.model.scaffold69.6332,evm.model.scaffold375.15952,evm.model.scaffold117.8847,evm.model.scaffold257.13419,evm.model.scaffold688.20066,evm.model.scaffold63.6075,evm.model.scaffold668.19893,evm.model.scaffol…
Biological process	myelination	GO:0042552	0.0433145	23	531	0.000411823	0.00733793	23	2.18559	evm.model.scaffold17.1782,evm.model.scaffold320.14682,evm.model.scaffold375.15950,evm.model.scaffold422.16882,evm.model.scaffold117.8888,evm.model.scaffold69.6292,evm.model.scaffold73.6573,evm.model.scaffold406.16626,evm.model.scaffold311.14510,evm.model.scaffold391.16267,evm.model.scaffold351.15333,evm.model.scaffold138.9856,evm.model.scaffold42.3889,evm.model.scaffold1222.22985,evm.model.scaffo…
Biological process	smooth muscle cell migration	GO:0014909	0.0320151	17	531	0.000423007	0.00752202	17	2.54513	evm.model.scaffold233.12647,evm.model.scaffold298.14290,evm.model.scaffold546.18581,evm.model.scaffold26.2622,evm.model.scaffold247.13101,evm.model.scaffold811.21044,evm.model.scaffold586.19075,evm.model.scaffold234.12856,evm.model.scaffold134.9699,evm.model.scaffold695.20137,evm.model.scaffold28.2757,evm.model.scaffold308.14483,evm.model.scaffold1.32,evm.model.scaffold28.2738,evm.model.scaffold7…
Biological process	pigment cell differentiation	GO:0050931	0.0225989	12	531	0.000430774	0.00764472	12	3.16661	evm.model.scaffold30.2966,evm.model.scaffold233.12648,evm.model.scaffold564.18771,evm.model.scaffold450.17285,evm.model.scaffold704.20212,evm.model.scaffold108.8545,evm.model.scaffold934.21786,evm.model.scaffold292.14185,evm.model.scaffold531.18409,evm.model.scaffold294.14213,evm.model.scaffold25.2562,evm.model.scaffold56.5642,
Biological process	response to hypoxia	GO:0001666	0.086629	46	531	0.000432606	0.00766182	46	1.67721	evm.model.scaffold233.12647,evm.model.scaffold17.1782,evm.model.scaffold926.21746,evm.model.scaffold255.13354,evm.model.scaffold375.15950,evm.model.scaffold257.13419,evm.model.scaffold62.6004,evm.model.scaffold387.16190,evm.model.scaffold367.15739,evm.model.scaffold170.10903,evm.model.scaffold71.6458,evm.model.scaffold472.17645,evm.model.scaffold243.13040,evm.model.scaffold538.18475,evm.model.sca…
Biological process	calcium-mediated signaling	GO:0019722	0.0602637	32	531	0.000437186	0.00772741	32	1.89621	evm.model.scaffold233.12647,evm.model.scaffold17.1782,evm.model.scaffold564.18771,evm.model.scaffold257.13419,evm.model.scaffold367.15739,evm.model.scaffold865.21421,evm.model.scaffold39.3591,evm.model.scaffold394.16320,evm.model.scaffold610.19371,evm.model.scaffold108.8545,evm.model.scaffold311.14510,evm.model.scaffold48.4287,evm.model.scaffold20.2052,evm.model.scaffold351.15333,evm.model.scaffo…
Biological process	negative regulation of axon extension	GO:0030517	0.0207156	11	531	0.000444786	0.00784603	11	3.36232	evm.model.scaffold148.10294,evm.model.scaffold247.13101,evm.model.scaffold3.276,evm.model.scaffold351.15333,evm.model.scaffold638.19692,evm.model.scaffold840.21238,evm.model.scaffold134.9699,evm.model.scaffold227.12492,evm.model.scaffold30.2908,evm.model.scaffold85.7227,evm.model.scaffold85.7218,
Biological process	skeletal muscle myosin thick filament assembly	GO:0030241	0.0112994	6	531	0.000452155	0.00796009	6	5.94808	evm.model.scaffold926.21746,evm.model.scaffold1122.22625,evm.model.scaffold1115.22607,evm.model.scaffold544.18544,evm.model.scaffold468.17590,evm.model.scaffold543.18529,
Biological process	vascular process in circulatory system	GO:0003018	0.0753296	40	531	0.000456323	0.00801747	40	1.74874	evm.model.scaffold233.12647,evm.model.scaffold117.8835,evm.model.scaffold564.18774,evm.model.scaffold564.18771,evm.model.scaffold516.18218,evm.model.scaffold457.17397,evm.model.scaffold121.9181,evm.model.scaffold755.20553,evm.model.scaffold422.16882,evm.model.scaffold978.22000,evm.model.scaffold71.6458,evm.model.scaffold243.13040,evm.model.scaffold538.18475,evm.model.scaffold45.4005,evm.model.sca…
Biological process	regulation of T cell activation	GO:0050863	0.0696798	37	531	0.000456777	0.00800948	37	1.79518	evm.model.scaffold233.12647,evm.model.scaffold465.17498,evm.model.scaffold117.8847,evm.model.scaffold257.13419,evm.model.scaffold1018.22191,evm.model.scaffold62.6004,evm.model.scaffold367.15739,evm.model.scaffold360.15477,evm.model.scaffold865.21421,evm.model.scaffold80.7030,evm.model.scaffold693.20101,evm.model.scaffold408.16694,evm.model.scaffold792.20871,evm.model.scaffold792.20877,evm.model.s…
Biological process	metanephros morphogenesis	GO:0003338	0.0150659	8	531	0.000459742	0.00804549	8	4.37968	evm.model.scaffold685.20043,evm.model.scaffold338.15039,evm.model.scaffold101.8201,evm.model.scaffold435.17065,evm.model.scaffold373.15916,evm.model.scaffold79.6968,evm.model.scaffold104.8408,evm.model.scaffold20.1997,
Biological process	salivary gland morphogenesis	GO:0007435	0.0225989	12	531	0.000459769	0.00803002	12	3.14399	evm.model.scaffold63.6075,evm.model.scaffold668.19893,evm.model.scaffold127.9368,evm.model.scaffold166.10795,evm.model.scaffold247.13101,evm.model.scaffold1608.23837,evm.model.scaffold602.19247,evm.model.scaffold586.19075,evm.model.scaffold181.11247,evm.model.scaffold71.6509,evm.model.scaffold85.7227,evm.model.scaffold85.7218,
Biological process	immune response-regulating signaling pathway	GO:0002764	0.0960452	51	531	0.000467572	0.00815016	51	1.62103	evm.model.scaffold77.6782,evm.model.scaffold306.14449,evm.model.scaffold465.17498,evm.model.scaffold257.13419,evm.model.scaffold444.17178,evm.model.scaffold367.15739,evm.model.scaffold1706.23981,evm.model.scaffold121.9181,evm.model.scaffold113.8721,evm.model.scaffold118.8991,evm.model.scaffold422.16882,evm.model.scaffold408.16694,evm.model.scaffold48.4353,evm.model.scaffold48.4348,evm.model.scaff…
Biological process	regulation of immune system process	GO:0002682	0.237288	126	531	0.000474355	0.0082521	126	1.31671	evm.model.scaffold233.12647,evm.model.scaffold77.6782,evm.model.scaffold469.17610,evm.model.scaffold306.14449,evm.model.scaffold324.14811,evm.model.scaffold233.12648,evm.model.scaffold465.17498,evm.model.scaffold564.18774,evm.model.scaffold117.8847,evm.model.scaffold257.13419,evm.model.scaffold1018.22191,evm.model.scaffold62.6004,evm.model.scaffold524.18311,evm.model.scaffold1204.22913,evm.model.…
Biological process	cell part morphogenesis	GO:0032990	0.220339	117	531	0.000477541	0.00829117	117	1.33485	evm.model.scaffold233.12647,evm.model.scaffold298.14290,evm.model.scaffold120.9126,evm.model.scaffold17.1782,evm.model.scaffold926.21746,evm.model.scaffold69.6333,evm.model.scaffold516.18216,evm.model.scaffold69.6332,evm.model.scaffold375.15952,evm.model.scaffold117.8847,evm.model.scaffold257.13419,evm.model.scaffold688.20066,evm.model.scaffold63.6075,evm.model.scaffold668.19893,evm.model.scaffol…
Biological process	regulation of toll-like receptor signaling pathway	GO:0034121	0.0244821	13	531	0.000481405	0.00834183	13	2.96173	evm.model.scaffold465.17498,evm.model.scaffold444.17178,evm.model.scaffold113.8721,evm.model.scaffold408.16694,evm.model.scaffold538.18475,evm.model.scaffold1432.23535,evm.model.scaffold8.878,evm.model.scaffold373.15916,evm.model.scaffold667.19884,evm.model.scaffold12.1329,evm.model.scaffold227.12492,evm.model.scaffold79.6968,evm.model.scaffold541.18503,
Biological process	actin cytoskeleton organization	GO:0030036	0.13936	74	531	0.000485194	0.00839101	74	1.46958	evm.model.scaffold233.12647,evm.model.scaffold926.21746,evm.model.scaffold69.6333,evm.model.scaffold69.6332,evm.model.scaffold375.15950,evm.model.scaffold429.16970,evm.model.scaffold177.11091,evm.model.scaffold524.18311,evm.model.scaffold387.16190,evm.model.scaffold426.16937,evm.model.scaffold123.9227,evm.model.scaffold4.389,evm.model.scaffold792.20877,evm.model.scaffold798.20908,evm.model.scaffo…
Biological process	regulation of kinase activity	GO:0043549	0.129944	69	531	0.000504177	0.00870224	69	1.49228	evm.model.scaffold926.21746,evm.model.scaffold390.16245,evm.model.scaffold227.12504,evm.model.scaffold444.17178,evm.model.scaffold113.8721,evm.model.scaffold127.9368,evm.model.scaffold865.21421,evm.model.scaffold578.19012,evm.model.scaffold685.20043,evm.model.scaffold21.2089,evm.model.scaffold57.5666,evm.model.scaffold166.10795,evm.model.scaffold120.9081,evm.model.scaffold37.3511,evm.model.scaffo…
Biological process	rhythmic process	GO:0048511	0.0847458	45	531	0.000508438	0.00875864	45	1.67573	evm.model.scaffold1727.23994,evm.model.scaffold66.6167,evm.model.scaffold778.20743,evm.model.scaffold574.18975,evm.model.scaffold444.17178,evm.model.scaffold280.14000,evm.model.scaffold52.4698,evm.model.scaffold578.19012,evm.model.scaffold798.20908,evm.model.scaffold538.18475,evm.model.scaffold413.16776,evm.model.scaffold406.16614,evm.model.scaffold12.1145,evm.model.scaffold50.4555,evm.model.scaf…
Biological process	semaphorin-plexin signaling pathway	GO:0071526	0.0150659	8	531	0.000508819	0.00874812	8	4.31528	evm.model.scaffold247.13101,evm.model.scaffold435.17065,evm.model.scaffold6.818,evm.model.scaffold586.19075,evm.model.scaffold51.4673,evm.model.scaffold85.7227,evm.model.scaffold234.12776,evm.model.scaffold85.7218,
Biological process	modulation of excitatory postsynaptic potential	GO:0098815	0.0207156	11	531	0.000512207	0.00878924	11	3.3072	evm.model.scaffold429.16970,evm.model.scaffold524.18311,evm.model.scaffold101.8201,evm.model.scaffold50.4590,evm.model.scaffold18.1817,evm.model.scaffold290.14174,evm.model.scaffold901.21605,evm.model.scaffold980.22013,evm.model.scaffold88.7384,evm.model.scaffold333.14976,evm.model.scaffold333.14978,
Biological process	regulation of synapse assembly	GO:0051963	0.0414313	22	531	0.000522264	0.00894441	22	2.19282	evm.model.scaffold69.6333,evm.model.scaffold516.18216,evm.model.scaffold69.6332,evm.model.scaffold63.6075,evm.model.scaffold450.17285,evm.model.scaffold193.11588,evm.model.scaffold59.5863,evm.model.scaffold101.8201,evm.model.scaffold50.4590,evm.model.scaffold138.9856,evm.model.scaffold18.1817,evm.model.scaffold1222.22985,evm.model.scaffold901.21605,evm.model.scaffold804.20949,evm.model.scaffold29…
Biological process	striated muscle myosin thick filament assembly	GO:0071688	0.0112994	6	531	0.000524711	0.00896889	6	5.79156	evm.model.scaffold926.21746,evm.model.scaffold1122.22625,evm.model.scaffold1115.22607,evm.model.scaffold544.18544,evm.model.scaffold468.17590,evm.model.scaffold543.18529,
Biological process	kidney epithelium development	GO:0072073	0.047081	25	531	0.000525644	0.00896746	25	2.06997	evm.model.scaffold30.2966,evm.model.scaffold120.9126,evm.model.scaffold63.6075,evm.model.scaffold127.9368,evm.model.scaffold685.20043,evm.model.scaffold21.2089,evm.model.scaffold42.3806,evm.model.scaffold538.18475,evm.model.scaffold101.8201,evm.model.scaffold45.4005,evm.model.scaffold435.17065,evm.model.scaffold373.15916,evm.model.scaffold41.3757,evm.model.scaffold31.3079,evm.model.scaffold134.96…
Biological process	macromolecule modification	GO:0043412	0.416196	221	531	0.000530298	0.0090294	221	1.19685	evm.model.scaffold1727.23994,evm.model.scaffold233.12647,evm.model.scaffold77.6782,evm.model.scaffold469.17610,evm.model.scaffold298.14290,evm.model.scaffold306.14449,evm.model.scaffold926.21746,evm.model.scaffold390.16245,evm.model.scaffold233.12648,evm.model.scaffold255.13354,evm.model.scaffold69.6333,evm.model.scaffold465.17498,evm.model.scaffold516.18216,evm.model.scaffold564.18774,evm.model.…
Biological process	leukocyte differentiation	GO:0002521	0.111111	59	531	0.000532268	0.00904548	59	1.54911	evm.model.scaffold77.6782,evm.model.scaffold390.16245,evm.model.scaffold320.14682,evm.model.scaffold465.17498,evm.model.scaffold375.15950,evm.model.scaffold257.13419,evm.model.scaffold62.6004,evm.model.scaffold450.17285,evm.model.scaffold444.17178,evm.model.scaffold367.15739,evm.model.scaffold117.8888,evm.model.scaffold865.21421,evm.model.scaffold80.7030,evm.model.scaffold693.20101,evm.model.scaf…
Biological process	regulation of BMP signaling pathway	GO:0030510	0.0320151	17	531	0.00053271	0.00903558	17	2.49423	evm.model.scaffold469.17610,evm.model.scaffold688.20066,evm.model.scaffold59.5863,evm.model.scaffold685.20043,evm.model.scaffold459.17451,evm.model.scaffold338.15039,evm.model.scaffold414.16778,evm.model.scaffold86.7243,evm.model.scaffold250.13244,evm.model.scaffold75.6695,evm.model.scaffold354.15371,evm.model.scaffold140.9954,evm.model.scaffold20.1997,evm.model.scaffold840.21268,evm.model.scaffo…
Biological process	type B pancreatic cell proliferation	GO:0044342	0.0131827	7	531	0.000559768	0.0094763	7	4.84451	evm.model.scaffold233.12647,evm.model.scaffold465.17517,evm.model.scaffold312.14524,evm.model.scaffold12.1329,evm.model.scaffold617.19445,evm.model.scaffold308.14483,evm.model.scaffold1.32,
Biological process	adult behavior	GO:0030534	0.0621469	33	531	0.000560136	0.00946436	33	1.84799	evm.model.scaffold298.14290,evm.model.scaffold69.6333,evm.model.scaffold69.6332,evm.model.scaffold778.20743,evm.model.scaffold35.3322,evm.model.scaffold227.12504,evm.model.scaffold177.11091,evm.model.scaffold195.11633,evm.model.scaffold89.7664,evm.model.scaffold888.21532,evm.model.scaffold50.4573,evm.model.scaffold313.14534,evm.model.scaffold435.17065,evm.model.scaffold265.13610,evm.model.scaffol…
Biological process	regulation of animal organ morphogenesis	GO:2000027	0.0451977	24	531	0.000566321	0.00955058	24	2.09599	evm.model.scaffold120.9126,evm.model.scaffold1141.22698,evm.model.scaffold127.9382,evm.model.scaffold127.9368,evm.model.scaffold59.5863,evm.model.scaffold685.20043,evm.model.scaffold538.18475,evm.model.scaffold101.8201,evm.model.scaffold50.4590,evm.model.scaffold414.16778,evm.model.scaffold108.8545,evm.model.scaffold391.16267,evm.model.scaffold435.17065,evm.model.scaffold373.15916,evm.model.scaff…
Biological process	neuron projection organization	GO:0106027	0.0357815	19	531	0.000569918	0.0095929	19	2.33865	evm.model.scaffold298.14290,evm.model.scaffold668.19893,evm.model.scaffold42.3806,evm.model.scaffold101.8201,evm.model.scaffold50.4590,evm.model.scaffold12.1294,evm.model.scaffold18.1817,evm.model.scaffold466.17562,evm.model.scaffold37.3468,evm.model.scaffold708.20241,evm.model.scaffold88.7432,evm.model.scaffold31.3079,evm.model.scaffold24.2336,evm.model.scaffold88.7384,evm.model.scaffold140.9954…
Biological process	regulation of presynapse organization	GO:0099174	0.0207156	11	531	0.000587963	0.00987778	11	3.25386	evm.model.scaffold450.17285,evm.model.scaffold59.5863,evm.model.scaffold101.8201,evm.model.scaffold50.4590,evm.model.scaffold1222.22985,evm.model.scaffold901.21605,evm.model.scaffold804.20949,evm.model.scaffold294.14213,evm.model.scaffold227.12492,evm.model.scaffold260.13495,evm.model.scaffold354.15371,
Biological process	relaxation of cardiac muscle	GO:0055119	0.0188324	10	531	0.000592438	0.00993404	10	3.49332	evm.model.scaffold926.21746,evm.model.scaffold182.11288,evm.model.scaffold26.2622,evm.model.scaffold1115.22607,evm.model.scaffold457.17406,evm.model.scaffold468.17590,evm.model.scaffold333.14976,evm.model.scaffold333.14978,evm.model.scaffold543.18529,evm.model.scaffold54.5545,
Biological process	positive regulation of cell projection organization	GO:0031346	0.0960452	51	531	0.000602667	0.0100864	51	1.60298	evm.model.scaffold298.14290,evm.model.scaffold69.6332,evm.model.scaffold688.20066,evm.model.scaffold121.9181,evm.model.scaffold127.9368,evm.model.scaffold491.17924,evm.model.scaffold408.16694,evm.model.scaffold59.5863,evm.model.scaffold37.3511,evm.model.scaffold20.2039,evm.model.scaffold783.20810,evm.model.scaffold610.19365,evm.model.scaffold247.13101,evm.model.scaffold12.1152,evm.model.scaffold3…
Biological process	cellular response to nitrogen compound	GO:1901699	0.150659	80	531	0.00060528	0.0101109	80	1.43281	evm.model.scaffold233.12647,evm.model.scaffold298.14290,evm.model.scaffold233.12648,evm.model.scaffold564.18774,evm.model.scaffold375.15950,evm.model.scaffold778.20743,evm.model.scaffold755.20553,evm.model.scaffold113.8721,evm.model.scaffold123.9227,evm.model.scaffold1015.22174,evm.model.scaffold118.8991,evm.model.scaffold422.16882,evm.model.scaffold408.16694,evm.model.scaffold59.5863,evm.model.s…
Biological process	cell-substrate junction assembly	GO:0007044	0.0338983	18	531	0.000606125	0.0101059	18	2.39216	evm.model.scaffold69.6332,evm.model.scaffold63.6075,evm.model.scaffold123.9227,evm.model.scaffold491.17924,evm.model.scaffold685.20043,evm.model.scaffold610.19365,evm.model.scaffold571.18873,evm.model.scaffold321.14713,evm.model.scaffold248.13205,evm.model.scaffold41.3757,evm.model.scaffold78.6910,evm.model.scaffold78.6870,evm.model.scaffold28.2757,evm.model.scaffold72.6527,evm.model.scaffold104.…
Biological process	cellular component maintenance	GO:0043954	0.0282486	15	531	0.000608923	0.0101334	15	2.64518	evm.model.scaffold69.6333,evm.model.scaffold69.6332,evm.model.scaffold117.8847,evm.model.scaffold195.11636,evm.model.scaffold705.20217,evm.model.scaffold290.14172,evm.model.scaffold901.21605,evm.model.scaffold466.17562,evm.model.scaffold25.2498,evm.model.scaffold41.3742,evm.model.scaffold88.7384,evm.model.scaffold140.9954,evm.model.scaffold701.20201,evm.model.scaffold85.7215,evm.model.scaffold519…
Biological process	odontogenesis	GO:0042476	0.0414313	22	531	0.000625329	0.0103868	22	2.16342	evm.model.scaffold564.18774,evm.model.scaffold810.21038,evm.model.scaffold63.6075,evm.model.scaffold865.21421,evm.model.scaffold699.20193,evm.model.scaffold57.5666,evm.model.scaffold101.8201,evm.model.scaffold108.8545,evm.model.scaffold3.276,evm.model.scaffold391.16267,evm.model.scaffold457.17402,evm.model.scaffold934.21786,evm.model.scaffold168.10834,evm.model.scaffold41.3757,evm.model.scaffold5…
Biological process	branching involved in blood vessel morphogenesis	GO:0001569	0.0225989	12	531	0.000630631	0.0104552	12	3.03557	evm.model.scaffold257.13419,evm.model.scaffold367.15739,evm.model.scaffold45.4005,evm.model.scaffold414.16778,evm.model.scaffold108.8545,evm.model.scaffold586.19075,evm.model.scaffold156.10553,evm.model.scaffold248.13157,evm.model.scaffold1418.23505,evm.model.scaffold840.21251,evm.model.scaffold85.7227,evm.model.scaffold85.7218,
Biological process	protein autophosphorylation	GO:0046777	0.0564972	30	531	0.000631212	0.0104452	30	1.90051	evm.model.scaffold77.6782,evm.model.scaffold233.12648,evm.model.scaffold668.19893,evm.model.scaffold444.17178,evm.model.scaffold426.16937,evm.model.scaffold360.15477,evm.model.scaffold127.9368,evm.model.scaffold685.20043,evm.model.scaffold21.2089,evm.model.scaffold120.9081,evm.model.scaffold465.17515,evm.model.scaffold91.7751,evm.model.scaffold811.21044,evm.model.scaffold8.878,evm.model.scaffold8…
Biological process	kidney morphogenesis	GO:0060993	0.0338983	18	531	0.000632285	0.0104434	18	2.38353	evm.model.scaffold30.2966,evm.model.scaffold120.9126,evm.model.scaffold63.6075,evm.model.scaffold685.20043,evm.model.scaffold21.2089,evm.model.scaffold42.3806,evm.model.scaffold338.15039,evm.model.scaffold538.18475,evm.model.scaffold101.8201,evm.model.scaffold435.17065,evm.model.scaffold373.15916,evm.model.scaffold466.17527,evm.model.scaffold308.14483,evm.model.scaffold484.17805,evm.model.scaffol…
Biological process	inorganic cation transmembrane transport	GO:0098662	0.107345	57	531	0.00063259	0.0104289	57	1.55215	evm.model.scaffold233.12647,evm.model.scaffold117.8835,evm.model.scaffold778.20743,evm.model.scaffold426.16937,evm.model.scaffold121.9181,evm.model.scaffold755.20553,evm.model.scaffold1015.22174,evm.model.scaffold865.21421,evm.model.scaffold39.3589,evm.model.scaffold182.11288,evm.model.scaffold243.13040,evm.model.scaffold538.18475,evm.model.scaffold26.2622,evm.model.scaffold454.17353,evm.model.sc…
Biological process	regulation of nitrogen compound metabolic process	GO:0051171	0.538606	286	531	0.000640647	0.010542	286	1.14888	evm.model.scaffold1727.23994,evm.model.scaffold233.12647,evm.model.scaffold77.6782,evm.model.scaffold298.14290,evm.model.scaffold306.14449,evm.model.scaffold120.9126,evm.model.scaffold926.21746,evm.model.scaffold390.16245,evm.model.scaffold233.12648,evm.model.scaffold255.13354,evm.model.scaffold320.14682,evm.model.scaffold69.6333,evm.model.scaffold465.17498,evm.model.scaffold564.18774,evm.model.s…
Biological process	regulation of hormone secretion	GO:0046883	0.0734463	39	531	0.000645531	0.0106026	39	1.73186	evm.model.scaffold233.12647,evm.model.scaffold77.6782,evm.model.scaffold298.14290,evm.model.scaffold778.20743,evm.model.scaffold1204.22913,evm.model.scaffold121.9181,evm.model.scaffold195.11633,evm.model.scaffold422.16882,evm.model.scaffold127.9368,evm.model.scaffold865.21421,evm.model.scaffold82.7109,evm.model.scaffold182.11288,evm.model.scaffold57.5666,evm.model.scaffold73.6573,evm.model.scaffo…
Biological process	temperature homeostasis	GO:0001659	0.0451977	24	531	0.000647047	0.0106077	24	2.07622	evm.model.scaffold77.6782,evm.model.scaffold17.1782,evm.model.scaffold465.17498,evm.model.scaffold564.18771,evm.model.scaffold63.6075,evm.model.scaffold29.2803,evm.model.scaffold865.21421,evm.model.scaffold48.4348,evm.model.scaffold120.9059,evm.model.scaffold45.4005,evm.model.scaffold148.10260,evm.model.scaffold108.8545,evm.model.scaffold12.1152,evm.model.scaffold48.4287,evm.model.scaffold811.210…
Biological process	regulation of cellular component biogenesis	GO:0044087	0.163842	87	531	0.000656781	0.0107473	87	1.40332	evm.model.scaffold30.2966,evm.model.scaffold233.12647,evm.model.scaffold469.17610,evm.model.scaffold926.21746,evm.model.scaffold69.6333,evm.model.scaffold516.18216,evm.model.scaffold564.18774,evm.model.scaffold69.6332,evm.model.scaffold688.20066,evm.model.scaffold429.16970,evm.model.scaffold177.11091,evm.model.scaffold63.6075,evm.model.scaffold76.6728,evm.model.scaffold524.18311,evm.model.scaffol…
Biological process	cardiac muscle cell development	GO:0055013	0.0338983	18	531	0.00065941	0.0107704	18	2.37495	evm.model.scaffold926.21746,evm.model.scaffold524.18311,evm.model.scaffold243.13040,evm.model.scaffold1122.22625,evm.model.scaffold465.17515,evm.model.scaffold610.19371,evm.model.scaffold313.14534,evm.model.scaffold1115.22607,evm.model.scaffold298.14312,evm.model.scaffold544.18544,evm.model.scaffold41.3757,evm.model.scaffold156.10549,evm.model.scaffold67.6219,evm.model.scaffold980.22013,evm.model…
Biological process	aorta development	GO:0035904	0.0263653	14	531	0.000668293	0.0108953	14	2.73148	evm.model.scaffold30.2966,evm.model.scaffold450.17285,evm.model.scaffold166.10795,evm.model.scaffold1122.22625,evm.model.scaffold14.1522,evm.model.scaffold351.15211,evm.model.scaffold586.19075,evm.model.scaffold544.18544,evm.model.scaffold156.10549,evm.model.scaffold294.14213,evm.model.scaffold466.17527,evm.model.scaffold840.21251,evm.model.scaffold20.1997,evm.model.scaffold61.5946,
Biological process	regulation of calcium ion transport	GO:0051924	0.0640301	34	531	0.000684958	0.0111464	34	1.80741	evm.model.scaffold17.1782,evm.model.scaffold257.13419,evm.model.scaffold367.15739,evm.model.scaffold755.20553,evm.model.scaffold39.3589,evm.model.scaffold182.11288,evm.model.scaffold538.18475,evm.model.scaffold26.2622,evm.model.scaffold50.4573,evm.model.scaffold454.17353,evm.model.scaffold783.20810,evm.model.scaffold108.8545,evm.model.scaffold12.1152,evm.model.scaffold265.13610,evm.model.scaffold…
Biological process	negative regulation of osteoblast differentiation	GO:0045668	0.0188324	10	531	0.000687566	0.0111682	10	3.42802	evm.model.scaffold257.13419,evm.model.scaffold367.15739,evm.model.scaffold685.20043,evm.model.scaffold57.5666,evm.model.scaffold413.16776,evm.model.scaffold3.276,evm.model.scaffold466.17565,evm.model.scaffold274.13767,evm.model.scaffold25.2562,evm.model.scaffold241.12998,
Biological process	pigment metabolic process	GO:0042440	0.0357815	19	531	0.000696862	0.0112984	19	2.30006	evm.model.scaffold63.6075,evm.model.scaffold280.14000,evm.model.scaffold360.15477,evm.model.scaffold704.20212,evm.model.scaffold408.16694,evm.model.scaffold59.5863,evm.model.scaffold45.4062,evm.model.scaffold1358.23380,evm.model.scaffold165.10758,evm.model.scaffold934.21786,evm.model.scaffold292.14185,evm.model.scaffold466.17565,evm.model.scaffold708.20241,evm.model.scaffold531.18409,evm.model.sc…
Biological process	response to bacterium	GO:0009617	0.150659	80	531	0.000699253	0.0113163	80	1.42584	evm.model.scaffold30.2966,evm.model.scaffold233.12647,evm.model.scaffold298.14290,evm.model.scaffold465.17498,evm.model.scaffold564.18771,evm.model.scaffold375.15950,evm.model.scaffold778.20743,evm.model.scaffold516.18218,evm.model.scaffold1018.22191,evm.model.scaffold1204.22913,evm.model.scaffold481.17764,evm.model.scaffold444.17178,evm.model.scaffold195.11636,evm.model.scaffold113.8721,evm.mode…
Biological process	gland development	GO:0048732	0.12806	68	531	0.000700801	0.0113206	68	1.47938	evm.model.scaffold1727.23994,evm.model.scaffold298.14290,evm.model.scaffold233.12648,evm.model.scaffold465.17498,evm.model.scaffold11.1075,evm.model.scaffold257.13419,evm.model.scaffold516.18218,evm.model.scaffold688.20066,evm.model.scaffold676.19971,evm.model.scaffold63.6075,evm.model.scaffold668.19893,evm.model.scaffold1141.22698,evm.model.scaffold367.15739,evm.model.scaffold755.20553,evm.model…
Biological process	ureteric bud morphogenesis	GO:0060675	0.0263653	14	531	0.000704182	0.0113545	14	2.71703	evm.model.scaffold30.2966,evm.model.scaffold120.9126,evm.model.scaffold63.6075,evm.model.scaffold685.20043,evm.model.scaffold42.3806,evm.model.scaffold538.18475,evm.model.scaffold435.17065,evm.model.scaffold373.15916,evm.model.scaffold466.17527,evm.model.scaffold308.14483,evm.model.scaffold484.17805,evm.model.scaffold18.1790,evm.model.scaffold79.6968,evm.model.scaffold104.8408,
Biological process	cartilage condensation	GO:0001502	0.0169492	9	531	0.000713964	0.0114912	9	3.7092	evm.model.scaffold233.12647,evm.model.scaffold142.10011,evm.model.scaffold30.2989,evm.model.scaffold101.8201,evm.model.scaffold50.4590,evm.model.scaffold75.6618,evm.model.scaffold101.8256,evm.model.scaffold638.19688,evm.model.scaffold308.14483,
Biological process	regulation of cardiac muscle cell proliferation	GO:0060043	0.0169492	9	531	0.000713964	0.0114912	9	3.7092	evm.model.scaffold1727.23994,evm.model.scaffold524.18311,evm.model.scaffold127.9368,evm.model.scaffold20.2014,evm.model.scaffold101.8256,evm.model.scaffold980.22013,evm.model.scaffold95.7944,evm.model.scaffold840.21251,evm.model.scaffold234.12776,
Biological process	branching involved in ureteric bud morphogenesis	GO:0001658	0.0244821	13	531	0.00072004	0.0115468	13	2.83832	evm.model.scaffold30.2966,evm.model.scaffold120.9126,evm.model.scaffold63.6075,evm.model.scaffold685.20043,evm.model.scaffold538.18475,evm.model.scaffold435.17065,evm.model.scaffold373.15916,evm.model.scaffold466.17527,evm.model.scaffold308.14483,evm.model.scaffold484.17805,evm.model.scaffold18.1790,evm.model.scaffold79.6968,evm.model.scaffold104.8408,
Biological process	positive regulation of osteoblast proliferation	GO:0033690	0.0094162	5	531	0.000725853	0.0116189	5	6.79256	evm.model.scaffold57.5666,evm.model.scaffold593.19156,evm.model.scaffold162.10694,evm.model.scaffold191.11537,evm.model.scaffold191.11538,
Biological process	somatic stem cell division	GO:0048103	0.0094162	5	531	0.000725853	0.0116189	5	6.79256	evm.model.scaffold59.5863,evm.model.scaffold101.8201,evm.model.scaffold50.4590,evm.model.scaffold354.15371,evm.model.scaffold78.6902,
Biological process	T cell activation	GO:0042110	0.0960452	51	531	0.00072929	0.0116317	51	1.58936	evm.model.scaffold233.12647,evm.model.scaffold465.17498,evm.model.scaffold117.8847,evm.model.scaffold257.13419,evm.model.scaffold1018.22191,evm.model.scaffold62.6004,evm.model.scaffold524.18311,evm.model.scaffold450.17285,evm.model.scaffold367.15739,evm.model.scaffold360.15477,evm.model.scaffold865.21421,evm.model.scaffold80.7030,evm.model.scaffold693.20101,evm.model.scaffold408.16694,evm.model.s…
Biological process	mesenchyme development	GO:0060485	0.0659134	35	531	0.000729635	0.0116162	35	1.78305	evm.model.scaffold120.9126,evm.model.scaffold255.13354,evm.model.scaffold564.18771,evm.model.scaffold35.3322,evm.model.scaffold257.13419,evm.model.scaffold63.6075,evm.model.scaffold62.6004,evm.model.scaffold367.15739,evm.model.scaffold118.8991,evm.model.scaffold127.9368,evm.model.scaffold685.20043,evm.model.scaffold166.10795,evm.model.scaffold101.8201,evm.model.scaffold45.4005,evm.model.scaffold4…
Biological process	cellular response to mechanical stimulus	GO:0071260	0.0282486	15	531	0.000741337	0.0117812	15	2.59527	evm.model.scaffold233.12647,evm.model.scaffold233.12648,evm.model.scaffold978.22000,evm.model.scaffold865.21421,evm.model.scaffold1432.23535,evm.model.scaffold14.1522,evm.model.scaffold108.8545,evm.model.scaffold75.6618,evm.model.scaffold351.15333,evm.model.scaffold351.15211,evm.model.scaffold6.818,evm.model.scaffold28.2757,evm.model.scaffold308.14483,evm.model.scaffold467.17586,evm.model.scaffol…
Biological process	positive regulation of protein processing	GO:0010954	0.0150659	8	531	0.000749312	0.011844	8	4.07554	evm.model.scaffold668.19893,evm.model.scaffold27.2685,evm.model.scaffold1432.23534,evm.model.scaffold1122.22625,evm.model.scaffold571.18873,evm.model.scaffold216.12226,evm.model.scaffold224.12439,evm.model.scaffold831.21172,
Biological process	heparan sulfate proteoglycan metabolic process	GO:0030201	0.0150659	8	531	0.000749312	0.011844	8	4.07554	evm.model.scaffold160.10630,evm.model.scaffold593.19156,evm.model.scaffold162.10694,evm.model.scaffold191.11537,evm.model.scaffold191.11538,evm.model.scaffold931.21776,evm.model.scaffold1418.23505,evm.model.scaffold24.2296,
Biological process	negative regulation of synapse organization	GO:1905809	0.0169492	9	531	0.000774527	0.0121338	9	3.66798	evm.model.scaffold257.13419,evm.model.scaffold63.6075,evm.model.scaffold450.17285,evm.model.scaffold367.15739,evm.model.scaffold901.21605,evm.model.scaffold294.14213,evm.model.scaffold31.3079,evm.model.scaffold134.9699,evm.model.scaffold24.2336,
Biological process	mesonephric tubule morphogenesis	GO:0072171	0.0263653	14	531	0.000780872	0.0122115	14	2.68858	evm.model.scaffold30.2966,evm.model.scaffold120.9126,evm.model.scaffold63.6075,evm.model.scaffold685.20043,evm.model.scaffold42.3806,evm.model.scaffold538.18475,evm.model.scaffold435.17065,evm.model.scaffold373.15916,evm.model.scaffold466.17527,evm.model.scaffold308.14483,evm.model.scaffold484.17805,evm.model.scaffold18.1790,evm.model.scaffold79.6968,evm.model.scaffold104.8408,
Biological process	regulation of muscle contraction	GO:0006937	0.0564972	30	531	0.000786529	0.0122782	30	1.87461	evm.model.scaffold233.12647,evm.model.scaffold11.1090,evm.model.scaffold755.20553,evm.model.scaffold491.17924,evm.model.scaffold182.11288,evm.model.scaffold243.13040,evm.model.scaffold26.2622,evm.model.scaffold465.17515,evm.model.scaffold313.14534,evm.model.scaffold261.13531,evm.model.scaffold457.17406,evm.model.scaffold28.2757,evm.model.scaffold25.2486,evm.model.scaffold308.14483,evm.model.scaff…
Biological process	response to decreased oxygen levels	GO:0036293	0.086629	46	531	0.000804594	0.012538	46	1.62864	evm.model.scaffold233.12647,evm.model.scaffold17.1782,evm.model.scaffold926.21746,evm.model.scaffold255.13354,evm.model.scaffold375.15950,evm.model.scaffold257.13419,evm.model.scaffold62.6004,evm.model.scaffold387.16190,evm.model.scaffold367.15739,evm.model.scaffold170.10903,evm.model.scaffold71.6458,evm.model.scaffold472.17645,evm.model.scaffold243.13040,evm.model.scaffold538.18475,evm.model.sca…
Biological process	muscle cell migration	GO:0014812	0.0338983	18	531	0.000810559	0.0126087	18	2.33299	evm.model.scaffold233.12647,evm.model.scaffold298.14290,evm.model.scaffold546.18581,evm.model.scaffold26.2622,evm.model.scaffold247.13101,evm.model.scaffold811.21044,evm.model.scaffold586.19075,evm.model.scaffold234.12856,evm.model.scaffold134.9699,evm.model.scaffold695.20137,evm.model.scaffold28.2757,evm.model.scaffold308.14483,evm.model.scaffold1.32,evm.model.scaffold28.2738,evm.model.scaffold7…
Biological process	ion transmembrane transport	GO:0034220	0.145009	77	531	0.00081795	0.0127013	77	1.43005	evm.model.scaffold233.12647,evm.model.scaffold117.8835,evm.model.scaffold778.20743,evm.model.scaffold426.16937,evm.model.scaffold121.9181,evm.model.scaffold755.20553,evm.model.scaffold1994.24173,evm.model.scaffold1015.22174,evm.model.scaffold978.22000,evm.model.scaffold865.21421,evm.model.scaffold170.10903,evm.model.scaffold39.3589,evm.model.scaffold888.21532,evm.model.scaffold182.11288,evm.model…
Biological process	regulation of myelination	GO:0031641	0.0207156	11	531	0.000819091	0.0126966	11	3.12774	evm.model.scaffold375.15950,evm.model.scaffold69.6292,evm.model.scaffold73.6573,evm.model.scaffold406.16626,evm.model.scaffold311.14510,evm.model.scaffold391.16267,evm.model.scaffold351.15333,evm.model.scaffold42.3889,evm.model.scaffold25.2562,evm.model.scaffold45.3968,evm.model.scaffold20.1997,
Biological process	regulation of stress-activated MAPK cascade	GO:0032872	0.047081	25	531	0.000821662	0.0127141	25	2.00656	evm.model.scaffold233.12647,evm.model.scaffold77.6782,evm.model.scaffold778.20743,evm.model.scaffold89.7664,evm.model.scaffold865.21421,evm.model.scaffold59.5863,evm.model.scaffold166.10795,evm.model.scaffold148.10294,evm.model.scaffold101.8201,evm.model.scaffold1432.23535,evm.model.scaffold50.4590,evm.model.scaffold414.16778,evm.model.scaffold20.2014,evm.model.scaffold156.10553,evm.model.scaffol…
Biological process	ERBB signaling pathway	GO:0038127	0.0414313	22	531	0.00082705	0.0127751	22	2.118	evm.model.scaffold1706.23981,evm.model.scaffold118.8991,evm.model.scaffold865.21421,evm.model.scaffold39.3591,evm.model.scaffold298.14273,evm.model.scaffold685.20043,evm.model.scaffold120.9081,evm.model.scaffold37.3511,evm.model.scaffold12.1145,evm.model.scaffold610.19365,evm.model.scaffold39.3604,evm.model.scaffold227.12492,evm.model.scaffold797.20904,evm.model.scaffold28.2757,evm.model.scaffold…
Biological process	BMP signaling pathway	GO:0030509	0.0414313	22	531	0.00082705	0.0127751	22	2.118	evm.model.scaffold233.12647,evm.model.scaffold469.17610,evm.model.scaffold564.18774,evm.model.scaffold688.20066,evm.model.scaffold1430.23528,evm.model.scaffold59.5863,evm.model.scaffold685.20043,evm.model.scaffold459.17451,evm.model.scaffold166.10795,evm.model.scaffold338.15039,evm.model.scaffold414.16778,evm.model.scaffold86.7243,evm.model.scaffold250.13244,evm.model.scaffold75.6695,evm.model.sc…
Biological process	regulation of immune response	GO:0050776	0.163842	87	531	0.00082733	0.0127348	87	1.39291	evm.model.scaffold77.6782,evm.model.scaffold469.17610,evm.model.scaffold306.14449,evm.model.scaffold233.12648,evm.model.scaffold465.17498,evm.model.scaffold257.13419,evm.model.scaffold62.6004,evm.model.scaffold1204.22913,evm.model.scaffold444.17178,evm.model.scaffold367.15739,evm.model.scaffold1706.23981,evm.model.scaffold121.9181,evm.model.scaffold113.8721,evm.model.scaffold195.11633,evm.model.s…
Biological process	positive regulation of ion transport	GO:0043270	0.0734463	39	531	0.000846722	0.0130106	39	1.70706	evm.model.scaffold778.20743,evm.model.scaffold121.9181,evm.model.scaffold755.20553,evm.model.scaffold89.7664,evm.model.scaffold978.22000,evm.model.scaffold865.21421,evm.model.scaffold243.13040,evm.model.scaffold538.18475,evm.model.scaffold694.20130,evm.model.scaffold50.4573,evm.model.scaffold124.9229,evm.model.scaffold412.16756,evm.model.scaffold783.20810,evm.model.scaffold610.19371,evm.model.sca…
Biological process	nephron tubule morphogenesis	GO:0072078	0.0282486	15	531	0.000856023	0.0131306	15	2.55906	evm.model.scaffold30.2966,evm.model.scaffold120.9126,evm.model.scaffold63.6075,evm.model.scaffold685.20043,evm.model.scaffold42.3806,evm.model.scaffold538.18475,evm.model.scaffold435.17065,evm.model.scaffold373.15916,evm.model.scaffold466.17527,evm.model.scaffold308.14483,evm.model.scaffold484.17805,evm.model.scaffold18.1790,evm.model.scaffold79.6968,evm.model.scaffold104.8408,evm.model.scaffold2…
Biological process	membrane biogenesis	GO:0044091	0.0282486	15	531	0.000856023	0.0131306	15	2.55906	evm.model.scaffold390.16245,evm.model.scaffold69.6333,evm.model.scaffold69.6332,evm.model.scaffold408.16694,evm.model.scaffold48.4353,evm.model.scaffold39.3591,evm.model.scaffold792.20877,evm.model.scaffold57.5666,evm.model.scaffold42.3889,evm.model.scaffold340.15060,evm.model.scaffold340.15061,evm.model.scaffold227.12492,evm.model.scaffold78.6835,evm.model.scaffold45.3968,evm.model.scaffold34.31…
Biological process	cardiac muscle tissue growth	GO:0055017	0.0320151	17	531	0.000862934	0.0131908	17	2.38911	evm.model.scaffold1727.23994,evm.model.scaffold429.16970,evm.model.scaffold524.18311,evm.model.scaffold127.9368,evm.model.scaffold166.10795,evm.model.scaffold45.4005,evm.model.scaffold313.14534,evm.model.scaffold311.14510,evm.model.scaffold20.2014,evm.model.scaffold101.8256,evm.model.scaffold67.6219,evm.model.scaffold980.22013,evm.model.scaffold95.7944,evm.model.scaffold840.21251,evm.model.scaffo…
Biological process	sarcomerogenesis	GO:0048769	0.0094162	5	531	0.000864038	0.0131848	5	6.54997	evm.model.scaffold926.21746,evm.model.scaffold465.17515,evm.model.scaffold1115.22607,evm.model.scaffold468.17590,evm.model.scaffold543.18529,
Biological process	hindbrain development	GO:0030902	0.0546139	29	531	0.000871044	0.0132688	29	1.88602	evm.model.scaffold233.12648,evm.model.scaffold69.6333,evm.model.scaffold69.6332,evm.model.scaffold11.1075,evm.model.scaffold83.7126,evm.model.scaffold755.20553,evm.model.scaffold123.9227,evm.model.scaffold422.16882,evm.model.scaffold699.20193,evm.model.scaffold394.16320,evm.model.scaffold413.16776,evm.model.scaffold101.8201,evm.model.scaffold50.4590,evm.model.scaffold1122.22625,evm.model.scaffold…
Biological process	response to forskolin	GO:1904321	0.0131827	7	531	0.000874334	0.0132959	7	4.50454	evm.model.scaffold41.3757,evm.model.scaffold54.5530,evm.model.scaffold6.676,evm.model.scaffold31.3079,evm.model.scaffold351.15266,evm.model.scaffold5231.24653,evm.model.scaffold514.18196,
Biological process	cellular response to forskolin	GO:1904322	0.0131827	7	531	0.000874334	0.0132959	7	4.50454	evm.model.scaffold41.3757,evm.model.scaffold54.5530,evm.model.scaffold6.676,evm.model.scaffold31.3079,evm.model.scaffold351.15266,evm.model.scaffold5231.24653,evm.model.scaffold514.18196,
Biological process	positive regulation of apoptotic process	GO:0043065	0.112994	60	531	0.000875591	0.0132693	60	1.51153	evm.model.scaffold77.6782,evm.model.scaffold298.14290,evm.model.scaffold465.17498,evm.model.scaffold257.13419,evm.model.scaffold83.7126,evm.model.scaffold367.15739,evm.model.scaffold426.16937,evm.model.scaffold195.11636,evm.model.scaffold89.7664,evm.model.scaffold123.9227,evm.model.scaffold29.2803,evm.model.scaffold865.21421,evm.model.scaffold80.7030,evm.model.scaffold1430.23528,evm.model.scaffol…
Biological process	positive chemotaxis	GO:0050918	0.0244821	13	531	0.000896409	0.0135615	13	2.77231	evm.model.scaffold120.9126,evm.model.scaffold429.16970,evm.model.scaffold360.15477,evm.model.scaffold39.3591,evm.model.scaffold101.8201,evm.model.scaffold1608.23837,evm.model.scaffold1222.22985,evm.model.scaffold260.13495,evm.model.scaffold85.7182,evm.model.scaffold28.2757,evm.model.scaffold45.3968,evm.model.scaffold104.8408,evm.model.scaffold831.21172,
Biological process	adult heart development	GO:0007512	0.0150659	8	531	0.000899878	0.0135906	8	3.96539	evm.model.scaffold926.21746,evm.model.scaffold243.13040,evm.model.scaffold1122.22625,evm.model.scaffold313.14534,evm.model.scaffold1115.22607,evm.model.scaffold544.18544,evm.model.scaffold468.17590,evm.model.scaffold543.18529,
Biological process	regulation of hormone levels	GO:0010817	0.122411	65	531	0.000901338	0.0135894	65	1.48086	evm.model.scaffold233.12647,evm.model.scaffold77.6782,evm.model.scaffold298.14290,evm.model.scaffold564.18774,evm.model.scaffold564.18771,evm.model.scaffold778.20743,evm.model.scaffold516.18218,evm.model.scaffold1204.22913,evm.model.scaffold121.9181,evm.model.scaffold195.11633,evm.model.scaffold422.16882,evm.model.scaffold127.9368,evm.model.scaffold865.21421,evm.model.scaffold82.7109,evm.model.sc…
Biological process	receptor clustering	GO:0043113	0.0301318	16	531	0.000907767	0.013663	16	2.45555	evm.model.scaffold117.8847,evm.model.scaffold1706.23981,evm.model.scaffold89.7664,evm.model.scaffold39.3591,evm.model.scaffold792.20877,evm.model.scaffold57.5666,evm.model.scaffold802.20920,evm.model.scaffold12.1294,evm.model.scaffold42.3889,evm.model.scaffold88.7384,evm.model.scaffold430.17019,evm.model.scaffold90.7693,evm.model.scaffold275.13884,evm.model.scaffold216.12183,evm.model.scaffold72.…
Biological process	regulation of neurotransmitter uptake	GO:0051580	0.0112994	6	531	0.00090942	0.0136645	6	5.23998	evm.model.scaffold120.9126,evm.model.scaffold408.16694,evm.model.scaffold435.17065,evm.model.scaffold265.13610,evm.model.scaffold116.8795,evm.model.scaffold641.19727,
Biological process	response to ketone	GO:1901654	0.0715631	38	531	0.000909517	0.0136428	38	1.71443	evm.model.scaffold298.14290,evm.model.scaffold574.18975,evm.model.scaffold524.18311,evm.model.scaffold83.7126,evm.model.scaffold121.9181,evm.model.scaffold755.20553,evm.model.scaffold1579.23795,evm.model.scaffold120.9152,evm.model.scaffold285.14102,evm.model.scaffold166.10795,evm.model.scaffold538.18475,evm.model.scaffold124.9230,evm.model.scaffold50.4573,evm.model.scaffold3.276,evm.model.scaffol…
Biological process	inner ear morphogenesis	GO:0042472	0.0357815	19	531	0.000915083	0.0137029	19	2.24812	evm.model.scaffold320.14682,evm.model.scaffold142.10011,evm.model.scaffold30.2989,evm.model.scaffold755.20553,evm.model.scaffold127.9368,evm.model.scaffold59.5863,evm.model.scaffold170.10903,evm.model.scaffold685.20043,evm.model.scaffold666.19878,evm.model.scaffold290.14172,evm.model.scaffold638.19688,evm.model.scaffold78.6910,evm.model.scaffold49.4511,evm.model.scaffold354.15371,evm.model.scaffo…
Biological process	embryonic skeletal system morphogenesis	GO:0048704	0.0357815	19	531	0.000915083	0.0137029	19	2.24812	evm.model.scaffold11.1075,evm.model.scaffold142.10011,evm.model.scaffold30.2989,evm.model.scaffold429.16970,evm.model.scaffold62.6004,evm.model.scaffold699.20193,evm.model.scaffold45.4005,evm.model.scaffold247.13101,evm.model.scaffold571.18873,evm.model.scaffold586.19075,evm.model.scaffold156.10549,evm.model.scaffold638.19688,evm.model.scaffold133.9666,evm.model.scaffold78.6900,evm.model.scaffold…
Biological process	postsynaptic density organization	GO:0097106	0.0188324	10	531	0.000915754	0.0136666	10	3.30449	evm.model.scaffold117.8847,evm.model.scaffold39.3591,evm.model.scaffold705.20217,evm.model.scaffold42.3889,evm.model.scaffold1222.22985,evm.model.scaffold901.21605,evm.model.scaffold227.12492,evm.model.scaffold260.13495,evm.model.scaffold88.7384,evm.model.scaffold45.3968,
Biological process	morphogenesis of embryonic epithelium	GO:0016331	0.0489642	26	531	0.000928794	0.0138378	26	1.95827	evm.model.scaffold120.9126,evm.model.scaffold35.3322,evm.model.scaffold63.6075,evm.model.scaffold1141.22698,evm.model.scaffold123.9227,evm.model.scaffold59.5863,evm.model.scaffold685.20043,evm.model.scaffold101.8201,evm.model.scaffold45.4005,evm.model.scaffold414.16778,evm.model.scaffold108.8545,evm.model.scaffold86.7243,evm.model.scaffold435.17065,evm.model.scaffold602.19247,evm.model.scaffold29…
Biological process	hemopoiesis	GO:0030097	0.173258	92	531	0.000937262	0.0139404	92	1.37177	evm.model.scaffold77.6782,evm.model.scaffold390.16245,evm.model.scaffold320.14682,evm.model.scaffold69.6333,evm.model.scaffold465.17498,evm.model.scaffold564.18774,evm.model.scaffold69.6332,evm.model.scaffold564.18771,evm.model.scaffold375.15950,evm.model.scaffold11.1075,evm.model.scaffold257.13419,evm.model.scaffold177.11091,evm.model.scaffold62.6004,evm.model.scaffold450.17285,evm.model.scaffol…
Biological process	nephron epithelium morphogenesis	GO:0072088	0.0282486	15	531	0.000940553	0.0139658	15	2.53547	evm.model.scaffold30.2966,evm.model.scaffold120.9126,evm.model.scaffold63.6075,evm.model.scaffold685.20043,evm.model.scaffold42.3806,evm.model.scaffold538.18475,evm.model.scaffold435.17065,evm.model.scaffold373.15916,evm.model.scaffold466.17527,evm.model.scaffold308.14483,evm.model.scaffold484.17805,evm.model.scaffold18.1790,evm.model.scaffold79.6968,evm.model.scaffold104.8408,evm.model.scaffold2…
Biological process	regulation of actin filament-based process	GO:0032970	0.0847458	45	531	0.000944068	0.0139944	45	1.6262	evm.model.scaffold233.12647,evm.model.scaffold69.6333,evm.model.scaffold69.6332,evm.model.scaffold429.16970,evm.model.scaffold177.11091,evm.model.scaffold524.18311,evm.model.scaffold123.9227,evm.model.scaffold491.17924,evm.model.scaffold792.20877,evm.model.scaffold182.11288,evm.model.scaffold1122.22625,evm.model.scaffold26.2622,evm.model.scaffold465.17515,evm.model.scaffold311.14510,evm.model.sca…
Biological process	bone development	GO:0060348	0.0583804	31	531	0.000947748	0.0140254	31	1.83104	evm.model.scaffold233.12647,evm.model.scaffold390.16245,evm.model.scaffold564.18774,evm.model.scaffold193.11588,evm.model.scaffold160.10630,evm.model.scaffold865.21421,evm.model.scaffold685.20043,evm.model.scaffold57.5666,evm.model.scaffold14.1522,evm.model.scaffold783.20810,evm.model.scaffold12.1145,evm.model.scaffold414.16778,evm.model.scaffold86.7243,evm.model.scaffold571.18873,evm.model.scaff…
Biological process	neuron recognition	GO:0008038	0.0301318	16	531	0.000948794	0.0140174	16	2.44532	evm.model.scaffold17.1782,evm.model.scaffold926.21746,evm.model.scaffold69.6333,evm.model.scaffold69.6332,evm.model.scaffold63.6075,evm.model.scaffold783.20810,evm.model.scaffold247.13101,evm.model.scaffold3.276,evm.model.scaffold391.16267,evm.model.scaffold224.12439,evm.model.scaffold181.11247,evm.model.scaffold134.9699,evm.model.scaffold1059.22353,evm.model.scaffold85.7227,evm.model.scaffold234…
Biological process	toll-like receptor signaling pathway	GO:0002224	0.0357815	19	531	0.000950598	0.0140205	19	2.24089	evm.model.scaffold465.17498,evm.model.scaffold444.17178,evm.model.scaffold113.8721,evm.model.scaffold422.16882,evm.model.scaffold408.16694,evm.model.scaffold48.4353,evm.model.scaffold538.18475,evm.model.scaffold1432.23535,evm.model.scaffold75.6618,evm.model.scaffold8.878,evm.model.scaffold373.15916,evm.model.scaffold667.19884,evm.model.scaffold12.1329,evm.model.scaffold227.12492,evm.model.scaffol…
Biological process	cell-substrate junction organization	GO:0150115	0.0338983	18	531	0.000951992	0.0140177	18	2.30048	evm.model.scaffold69.6332,evm.model.scaffold63.6075,evm.model.scaffold123.9227,evm.model.scaffold491.17924,evm.model.scaffold685.20043,evm.model.scaffold610.19365,evm.model.scaffold571.18873,evm.model.scaffold321.14713,evm.model.scaffold248.13205,evm.model.scaffold41.3757,evm.model.scaffold78.6910,evm.model.scaffold78.6870,evm.model.scaffold28.2757,evm.model.scaffold72.6527,evm.model.scaffold104.…
Biological process	regulation of stress-activated protein kinase signaling cascade	GO:0070302	0.047081	25	531	0.000957997	0.0140825	25	1.98484	evm.model.scaffold233.12647,evm.model.scaffold77.6782,evm.model.scaffold778.20743,evm.model.scaffold89.7664,evm.model.scaffold865.21421,evm.model.scaffold59.5863,evm.model.scaffold166.10795,evm.model.scaffold148.10294,evm.model.scaffold101.8201,evm.model.scaffold1432.23535,evm.model.scaffold50.4590,evm.model.scaffold414.16778,evm.model.scaffold20.2014,evm.model.scaffold156.10553,evm.model.scaffol…
Biological process	second-messenger-mediated signaling	GO:0019932	0.086629	46	531	0.000999862	0.0146491	46	1.61153	evm.model.scaffold233.12647,evm.model.scaffold66.6167,evm.model.scaffold17.1782,evm.model.scaffold320.14682,evm.model.scaffold564.18771,evm.model.scaffold778.20743,evm.model.scaffold257.13419,evm.model.scaffold367.15739,evm.model.scaffold121.9181,evm.model.scaffold865.21421,evm.model.scaffold39.3591,evm.model.scaffold394.16320,evm.model.scaffold182.11288,evm.model.scaffold26.2622,evm.model.scaffo…
Biological process	regulation of JNK cascade	GO:0046328	0.0376648	20	531	0.00100793	0.0147429	20	2.17685	evm.model.scaffold233.12647,evm.model.scaffold89.7664,evm.model.scaffold865.21421,evm.model.scaffold59.5863,evm.model.scaffold101.8201,evm.model.scaffold1432.23535,evm.model.scaffold50.4590,evm.model.scaffold414.16778,evm.model.scaffold20.2014,evm.model.scaffold156.10553,evm.model.scaffold466.17562,evm.model.scaffold116.8795,evm.model.scaffold351.15266,evm.model.scaffold617.19445,evm.model.scaffo…
Biological process	digestive system development	GO:0055123	0.0489642	26	531	0.00101455	0.0148151	26	1.94628	evm.model.scaffold564.18771,evm.model.scaffold35.3322,evm.model.scaffold195.11633,evm.model.scaffold578.19012,evm.model.scaffold166.10795,evm.model.scaffold414.16778,evm.model.scaffold108.8545,evm.model.scaffold20.2014,evm.model.scaffold811.21044,evm.model.scaffold373.15916,evm.model.scaffold1608.23837,evm.model.scaffold564.18750,evm.model.scaffold298.14312,evm.model.scaffold435.17081,evm.model.s…
Biological process	nerve development	GO:0021675	0.0357815	19	531	0.00102518	0.0148964	19	2.22657	evm.model.scaffold233.12647,evm.model.scaffold117.8835,evm.model.scaffold120.9126,evm.model.scaffold320.14682,evm.model.scaffold11.1075,evm.model.scaffold422.16882,evm.model.scaffold127.9368,evm.model.scaffold247.13101,evm.model.scaffold86.7243,evm.model.scaffold435.17065,evm.model.scaffold25.2486,evm.model.scaffold308.14483,evm.model.scaffold1072.22395,evm.model.scaffold1072.22396,evm.model.scaf…
Biological process	detection of stimulus	GO:0051606	0.0734463	39	531	0.00103211	0.0149724	39	1.68892	evm.model.scaffold17.1782,evm.model.scaffold926.21746,evm.model.scaffold375.15952,evm.model.scaffold142.10011,evm.model.scaffold30.2989,evm.model.scaffold426.16937,evm.model.scaffold1706.23981,evm.model.scaffold755.20553,evm.model.scaffold195.11636,evm.model.scaffold89.7664,evm.model.scaffold280.14000,evm.model.scaffold127.9368,evm.model.scaffold755.20573,evm.model.scaffold170.10903,evm.model.sca…
Biological process	synaptic vesicle exocytosis	GO:0016079	0.0433145	23	531	0.00103433	0.0149799	23	2.0427	evm.model.scaffold69.6333,evm.model.scaffold69.6332,evm.model.scaffold285.14102,evm.model.scaffold82.7109,evm.model.scaffold698.20173,evm.model.scaffold101.8201,evm.model.scaffold705.20217,evm.model.scaffold50.4590,evm.model.scaffold677.19974,evm.model.scaffold313.14534,evm.model.scaffold265.13610,evm.model.scaffold290.14174,evm.model.scaffold54.5530,evm.model.scaffold88.7432,evm.model.scaffold25…
Biological process	response to muscle stretch	GO:0035994	0.0188324	10	531	0.00105122	0.0151997	10	3.246	evm.model.scaffold926.21746,evm.model.scaffold243.13040,evm.model.scaffold1115.22607,evm.model.scaffold248.13205,evm.model.scaffold891.21560,evm.model.scaffold468.17590,evm.model.scaffold333.14976,evm.model.scaffold333.14978,evm.model.scaffold543.18529,evm.model.scaffold173.11001,
Biological process	regulation of neuron death	GO:1901214	0.079096	42	531	0.00105942	0.0152931	42	1.64942	evm.model.scaffold120.9126,evm.model.scaffold516.18216,evm.model.scaffold117.8847,evm.model.scaffold257.13419,evm.model.scaffold444.17178,evm.model.scaffold367.15739,evm.model.scaffold195.11633,evm.model.scaffold89.7664,evm.model.scaffold360.15477,evm.model.scaffold865.21421,evm.model.scaffold59.5863,evm.model.scaffold578.19012,evm.model.scaffold166.10795,evm.model.scaffold546.18581,evm.model.sca…
Biological process	regeneration	GO:0031099	0.079096	42	531	0.00105942	0.0152931	42	1.64942	evm.model.scaffold233.12647,evm.model.scaffold201.11760,evm.model.scaffold516.18218,evm.model.scaffold444.17178,evm.model.scaffold127.9368,evm.model.scaffold59.5863,evm.model.scaffold243.13040,evm.model.scaffold101.8201,evm.model.scaffold1432.23534,evm.model.scaffold50.4590,evm.model.scaffold3.276,evm.model.scaffold50.4555,evm.model.scaffold351.15333,evm.model.scaffold1115.22607,evm.model.scaffol…
Biological process	synapse maturation	GO:0060074	0.0169492	9	531	0.00106006	0.0152524	9	3.5119	evm.model.scaffold257.13419,evm.model.scaffold367.15739,evm.model.scaffold37.3511,evm.model.scaffold783.20810,evm.model.scaffold96.7998,evm.model.scaffold24.2336,evm.model.scaffold88.7384,evm.model.scaffold183.11321,evm.model.scaffold54.5545,
Biological process	protein metabolic process	GO:0019538	0.54049	287	531	0.00107064	0.0153795	287	1.14053	evm.model.scaffold1727.23994,evm.model.scaffold30.2966,evm.model.scaffold233.12647,evm.model.scaffold77.6782,evm.model.scaffold469.17610,evm.model.scaffold298.14290,evm.model.scaffold306.14449,evm.model.scaffold926.21746,evm.model.scaffold390.16245,evm.model.scaffold233.12648,evm.model.scaffold255.13354,evm.model.scaffold320.14682,evm.model.scaffold69.6333,evm.model.scaffold465.17498,evm.model.sc…
Biological process	thyroid hormone generation	GO:0006590	0.0150659	8	531	0.00107378	0.0153995	8	3.86104	evm.model.scaffold516.18218,evm.model.scaffold69.6292,evm.model.scaffold73.6573,evm.model.scaffold384.16141,evm.model.scaffold384.16139,evm.model.scaffold384.16138,evm.model.scaffold75.6618,evm.model.scaffold989.22040,
Biological process	positive regulation of cartilage development	GO:0061036	0.0150659	8	531	0.00107378	0.0153995	8	3.86104	evm.model.scaffold233.12647,evm.model.scaffold255.13354,evm.model.scaffold62.6004,evm.model.scaffold80.7030,evm.model.scaffold75.6618,evm.model.scaffold308.14483,evm.model.scaffold25.2562,evm.model.scaffold104.8408,
Biological process	inorganic ion transmembrane transport	GO:0098660	0.114878	61	531	0.00109479	0.01565	61	1.49165	evm.model.scaffold233.12647,evm.model.scaffold117.8835,evm.model.scaffold778.20743,evm.model.scaffold426.16937,evm.model.scaffold121.9181,evm.model.scaffold755.20553,evm.model.scaffold1015.22174,evm.model.scaffold865.21421,evm.model.scaffold39.3589,evm.model.scaffold888.21532,evm.model.scaffold182.11288,evm.model.scaffold243.13040,evm.model.scaffold538.18475,evm.model.scaffold26.2622,evm.model.sc…
Biological process	regulation of transferase activity	GO:0051338	0.141243	75	531	0.00109829	0.0156747	75	1.42317	evm.model.scaffold926.21746,evm.model.scaffold390.16245,evm.model.scaffold227.12504,evm.model.scaffold444.17178,evm.model.scaffold113.8721,evm.model.scaffold118.8991,evm.model.scaffold127.9368,evm.model.scaffold865.21421,evm.model.scaffold578.19012,evm.model.scaffold685.20043,evm.model.scaffold21.2089,evm.model.scaffold57.5666,evm.model.scaffold166.10795,evm.model.scaffold120.9081,evm.model.scaff…
Biological process	positive regulation of cellular component biogenesis	GO:0044089	0.0998117	53	531	0.00110302	0.0157167	53	1.54411	evm.model.scaffold233.12647,evm.model.scaffold469.17610,evm.model.scaffold926.21746,evm.model.scaffold516.18216,evm.model.scaffold564.18774,evm.model.scaffold688.20066,evm.model.scaffold193.11588,evm.model.scaffold408.16694,evm.model.scaffold578.19012,evm.model.scaffold39.3591,evm.model.scaffold37.3511,evm.model.scaffold197.11698,evm.model.scaffold101.8201,evm.model.scaffold1432.23535,evm.model.s…
Biological process	cerebral cortex development	GO:0021987	0.0357815	19	531	0.00110472	0.0157156	19	2.21244	evm.model.scaffold233.12648,evm.model.scaffold83.7126,evm.model.scaffold195.11633,evm.model.scaffold978.22000,evm.model.scaffold4.389,evm.model.scaffold39.3591,evm.model.scaffold783.20810,evm.model.scaffold42.3889,evm.model.scaffold41.3757,evm.model.scaffold1222.22985,evm.model.scaffold435.17081,evm.model.scaffold134.9699,evm.model.scaffold227.12492,evm.model.scaffold617.19445,evm.model.scaffold2…
Biological process	positive regulation of wound healing	GO:0090303	0.0244821	13	531	0.00110765	0.0157318	13	2.70931	evm.model.scaffold17.1782,evm.model.scaffold69.6292,evm.model.scaffold384.16141,evm.model.scaffold45.4005,evm.model.scaffold384.16138,evm.model.scaffold290.14172,evm.model.scaffold593.19156,evm.model.scaffold162.10694,evm.model.scaffold191.11537,evm.model.scaffold191.11538,evm.model.scaffold351.15266,evm.model.scaffold519.18258,evm.model.scaffold216.12178,
Biological process	keratinocyte proliferation	GO:0043616	0.0207156	11	531	0.00112095	0.0158951	11	3.01103	evm.model.scaffold465.17498,evm.model.scaffold35.3322,evm.model.scaffold117.8888,evm.model.scaffold39.3591,evm.model.scaffold943.21833,evm.model.scaffold1608.23837,evm.model.scaffold234.12856,evm.model.scaffold75.6695,evm.model.scaffold252.13298,evm.model.scaffold45.3968,evm.model.scaffold104.8408,
Biological process	labyrinthine layer development	GO:0060711	0.0207156	11	531	0.00112095	0.0158951	11	3.01103	evm.model.scaffold233.12647,evm.model.scaffold35.3322,evm.model.scaffold118.8991,evm.model.scaffold101.8201,evm.model.scaffold20.2039,evm.model.scaffold638.19692,evm.model.scaffold181.11247,evm.model.scaffold931.21776,evm.model.scaffold308.14483,evm.model.scaffold1418.23505,evm.model.scaffold104.8408,
Biological process	response to retinoic acid	GO:0032526	0.0376648	20	531	0.00112224	0.0158625	20	2.15764	evm.model.scaffold233.12647,evm.model.scaffold121.9181,evm.model.scaffold59.5863,evm.model.scaffold243.13040,evm.model.scaffold101.8201,evm.model.scaffold50.4590,evm.model.scaffold3.276,evm.model.scaffold86.7243,evm.model.scaffold1222.22985,evm.model.scaffold466.17565,evm.model.scaffold260.13495,evm.model.scaffold354.15371,evm.model.scaffold308.14483,evm.model.scaffold274.13767,evm.model.scaffold…
Biological process	negative regulation of gliogenesis	GO:0014014	0.0188324	10	531	0.00112486	0.0158741	10	3.21753	evm.model.scaffold546.18581,evm.model.scaffold138.9856,evm.model.scaffold1222.22985,evm.model.scaffold435.17081,evm.model.scaffold12.1329,evm.model.scaffold141.9977,evm.model.scaffold260.13495,evm.model.scaffold25.2562,evm.model.scaffold1072.22395,evm.model.scaffold20.1997,
Biological process	positive regulation of axonogenesis	GO:0050772	0.0320151	17	531	0.00115347	0.0162518	17	2.32671	evm.model.scaffold69.6332,evm.model.scaffold491.17924,evm.model.scaffold247.13101,evm.model.scaffold12.1152,evm.model.scaffold6.818,evm.model.scaffold165.10758,evm.model.scaffold586.19075,evm.model.scaffold42.3889,evm.model.scaffold1222.22985,evm.model.scaffold6.795,evm.model.scaffold37.3468,evm.model.scaffold708.20241,evm.model.scaffold134.9699,evm.model.scaffold260.13495,evm.model.scaffold80.69…
Biological process	regulation of leukocyte proliferation	GO:0070663	0.0583804	31	531	0.00116262	0.0163546	31	1.80775	evm.model.scaffold233.12647,evm.model.scaffold77.6782,evm.model.scaffold233.12648,evm.model.scaffold117.8847,evm.model.scaffold257.13419,evm.model.scaffold1018.22191,evm.model.scaffold367.15739,evm.model.scaffold360.15477,evm.model.scaffold118.8991,evm.model.scaffold865.21421,evm.model.scaffold685.20043,evm.model.scaffold792.20871,evm.model.scaffold792.20877,evm.model.scaffold394.16320,evm.model.…
Biological process	regulation of protein tyrosine kinase activity	GO:0061097	0.0244821	13	531	0.0011665	0.0163831	13	2.694	evm.model.scaffold685.20043,evm.model.scaffold37.3511,evm.model.scaffold12.1294,evm.model.scaffold12.1145,evm.model.scaffold313.14534,evm.model.scaffold340.15061,evm.model.scaffold430.17019,evm.model.scaffold27.2662,evm.model.scaffold71.6509,evm.model.scaffold216.12183,evm.model.scaffold72.6527,evm.model.scaffold216.12178,evm.model.scaffold5.461,
Biological process	response to transforming growth factor beta	GO:0071559	0.0527307	28	531	0.00116788	0.0163763	28	1.87415	evm.model.scaffold201.11761,evm.model.scaffold233.12648,evm.model.scaffold35.3322,evm.model.scaffold117.8888,evm.model.scaffold166.10795,evm.model.scaffold413.16776,evm.model.scaffold101.8201,evm.model.scaffold50.4590,evm.model.scaffold14.1522,evm.model.scaffold75.6618,evm.model.scaffold351.15211,evm.model.scaffold435.17065,evm.model.scaffold811.21044,evm.model.scaffold1115.22607,evm.model.scaffo…
Biological process	negative regulation by symbiont of host apoptotic process	GO:0033668	0.0112994	6	531	0.00116885	0.0163639	6	5.0018	evm.model.scaffold1018.22191,evm.model.scaffold23.2267,evm.model.scaffold465.17518,evm.model.scaffold1827.24084,evm.model.scaffold1523.23716,evm.model.scaffold1059.22353,
Biological process	negative regulation by symbiont of host programmed cell death	GO:0052041	0.0112994	6	531	0.00116885	0.0163639	6	5.0018	evm.model.scaffold1018.22191,evm.model.scaffold23.2267,evm.model.scaffold465.17518,evm.model.scaffold1827.24084,evm.model.scaffold1523.23716,evm.model.scaffold1059.22353,
Biological process	metanephric nephron morphogenesis	GO:0072273	0.0112994	6	531	0.00116885	0.0163639	6	5.0018	evm.model.scaffold685.20043,evm.model.scaffold435.17065,evm.model.scaffold373.15916,evm.model.scaffold79.6968,evm.model.scaffold104.8408,evm.model.scaffold20.1997,
Biological process	regulation of cation channel activity	GO:2001257	0.0489642	26	531	0.00117278	0.0163411	26	1.92662	evm.model.scaffold778.20743,evm.model.scaffold39.3589,evm.model.scaffold182.11288,evm.model.scaffold538.18475,evm.model.scaffold26.2622,evm.model.scaffold454.17353,evm.model.scaffold372.15910,evm.model.scaffold811.21042,evm.model.scaffold692.20092,evm.model.scaffold457.17406,evm.model.scaffold6.819,evm.model.scaffold804.20968,evm.model.scaffold531.18409,evm.model.scaffold88.7432,evm.model.scaffol…
Biological process	positive regulation of response to external stimulus	GO:0032103	0.0998117	53	531	0.00118307	0.0164585	53	1.53922	evm.model.scaffold233.12647,evm.model.scaffold120.9126,evm.model.scaffold17.1782,evm.model.scaffold778.20743,evm.model.scaffold429.16970,evm.model.scaffold524.18311,evm.model.scaffold1204.22913,evm.model.scaffold195.11633,evm.model.scaffold118.8991,evm.model.scaffold127.9368,evm.model.scaffold865.21421,evm.model.scaffold120.9152,evm.model.scaffold39.3591,evm.model.scaffold792.20871,evm.model.scaf…
Biological process	positive regulation of chondrocyte differentiation	GO:0032332	0.0131827	7	531	0.00119076	0.0165393	7	4.27932	evm.model.scaffold233.12647,evm.model.scaffold255.13354,evm.model.scaffold62.6004,evm.model.scaffold80.7030,evm.model.scaffold75.6618,evm.model.scaffold308.14483,evm.model.scaffold25.2562,
Biological process	regulation of neuron projection regeneration	GO:0070570	0.0207156	11	531	0.00119114	0.0165186	11	2.98873	evm.model.scaffold3.276,evm.model.scaffold290.14172,evm.model.scaffold1222.22985,evm.model.scaffold638.19692,evm.model.scaffold840.21238,evm.model.scaffold227.12492,evm.model.scaffold260.13495,evm.model.scaffold43.3904,evm.model.scaffold72.6527,evm.model.scaffold840.21268,evm.model.scaffold747.20514,
Biological process	positive regulation of protein tyrosine kinase activity	GO:0061098	0.0207156	11	531	0.00119114	0.0165186	11	2.98873	evm.model.scaffold685.20043,evm.model.scaffold37.3511,evm.model.scaffold12.1294,evm.model.scaffold12.1145,evm.model.scaffold313.14534,evm.model.scaffold430.17019,evm.model.scaffold27.2662,evm.model.scaffold71.6509,evm.model.scaffold216.12183,evm.model.scaffold216.12178,evm.model.scaffold5.461,
Biological process	autonomic nervous system development	GO:0048483	0.0225989	12	531	0.0011992	0.0165783	12	2.82153	evm.model.scaffold233.12647,evm.model.scaffold120.9126,evm.model.scaffold564.18771,evm.model.scaffold247.13101,evm.model.scaffold108.8545,evm.model.scaffold435.17065,evm.model.scaffold248.13157,evm.model.scaffold308.14483,evm.model.scaffold25.2562,evm.model.scaffold85.7227,evm.model.scaffold85.7218,evm.model.scaffold241.12997,
Biological process	regulation of primary metabolic process	GO:0080090	0.553672	294	531	0.00120012	0.0165651	294	1.13503	evm.model.scaffold1727.23994,evm.model.scaffold233.12647,evm.model.scaffold77.6782,evm.model.scaffold298.14290,evm.model.scaffold306.14449,evm.model.scaffold120.9126,evm.model.scaffold926.21746,evm.model.scaffold390.16245,evm.model.scaffold233.12648,evm.model.scaffold255.13354,evm.model.scaffold320.14682,evm.model.scaffold69.6333,evm.model.scaffold465.17498,evm.model.scaffold564.18774,evm.model.s…
Biological process	regulation of peptide hormone secretion	GO:0090276	0.0602637	32	531	0.00120898	0.0166613	32	1.78382	evm.model.scaffold233.12647,evm.model.scaffold77.6782,evm.model.scaffold298.14290,evm.model.scaffold1204.22913,evm.model.scaffold121.9181,evm.model.scaffold195.11633,evm.model.scaffold422.16882,evm.model.scaffold865.21421,evm.model.scaffold82.7109,evm.model.scaffold182.11288,evm.model.scaffold57.5666,evm.model.scaffold50.4573,evm.model.scaffold610.19365,evm.model.scaffold62.5967,evm.model.scaffol…
Biological process	membrane assembly	GO:0071709	0.0263653	14	531	0.00121913	0.0167749	14	2.56759	evm.model.scaffold390.16245,evm.model.scaffold69.6333,evm.model.scaffold69.6332,evm.model.scaffold408.16694,evm.model.scaffold48.4353,evm.model.scaffold39.3591,evm.model.scaffold792.20877,evm.model.scaffold57.5666,evm.model.scaffold42.3889,evm.model.scaffold340.15060,evm.model.scaffold340.15061,evm.model.scaffold227.12492,evm.model.scaffold78.6835,evm.model.scaffold45.3968,
Biological process	digestive tract development	GO:0048565	0.0451977	24	531	0.00121928	0.0167508	24	1.98269	evm.model.scaffold564.18771,evm.model.scaffold35.3322,evm.model.scaffold195.11633,evm.model.scaffold578.19012,evm.model.scaffold166.10795,evm.model.scaffold414.16778,evm.model.scaffold108.8545,evm.model.scaffold20.2014,evm.model.scaffold811.21044,evm.model.scaffold373.15916,evm.model.scaffold564.18750,evm.model.scaffold298.14312,evm.model.scaffold435.17081,evm.model.scaffold181.11247,evm.model.sc…
Biological process	locomotory behavior	GO:0007626	0.079096	42	531	0.00122227	0.0167658	42	1.63715	evm.model.scaffold1727.23994,evm.model.scaffold298.14290,evm.model.scaffold69.6333,evm.model.scaffold69.6332,evm.model.scaffold778.20743,evm.model.scaffold227.12504,evm.model.scaffold177.11091,evm.model.scaffold755.20553,evm.model.scaffold422.16882,evm.model.scaffold698.20173,evm.model.scaffold50.4573,evm.model.scaffold20.2039,evm.model.scaffold3.276,evm.model.scaffold313.14534,evm.model.scaffold…
Biological process	positive regulation of transferase activity	GO:0051347	0.0998117	53	531	0.00122499	0.0167771	53	1.53678	evm.model.scaffold227.12504,evm.model.scaffold444.17178,evm.model.scaffold118.8991,evm.model.scaffold127.9368,evm.model.scaffold865.21421,evm.model.scaffold578.19012,evm.model.scaffold685.20043,evm.model.scaffold21.2089,evm.model.scaffold166.10795,evm.model.scaffold120.9081,evm.model.scaffold37.3511,evm.model.scaffold705.20217,evm.model.scaffold1432.23535,evm.model.scaffold12.1294,evm.model.scaff…
Biological process	nephron morphogenesis	GO:0072028	0.0282486	15	531	0.00123768	0.0168722	15	2.46725	evm.model.scaffold30.2966,evm.model.scaffold120.9126,evm.model.scaffold63.6075,evm.model.scaffold685.20043,evm.model.scaffold42.3806,evm.model.scaffold538.18475,evm.model.scaffold435.17065,evm.model.scaffold373.15916,evm.model.scaffold466.17527,evm.model.scaffold308.14483,evm.model.scaffold484.17805,evm.model.scaffold18.1790,evm.model.scaffold79.6968,evm.model.scaffold104.8408,evm.model.scaffold2…
Biological process	positive regulation of stress-activated MAPK cascade	GO:0032874	0.0320151	17	531	0.00125035	0.0170186	17	2.30947	evm.model.scaffold233.12647,evm.model.scaffold77.6782,evm.model.scaffold778.20743,evm.model.scaffold865.21421,evm.model.scaffold59.5863,evm.model.scaffold166.10795,evm.model.scaffold148.10294,evm.model.scaffold101.8201,evm.model.scaffold1432.23535,evm.model.scaffold50.4590,evm.model.scaffold156.10553,evm.model.scaffold351.15266,evm.model.scaffold354.15371,evm.model.scaffold308.14483,evm.model.sca…
Biological process	regulation of cation transmembrane transport	GO:1904062	0.079096	42	531	0.00127266	0.0172957	42	1.63367	evm.model.scaffold778.20743,evm.model.scaffold121.9181,evm.model.scaffold39.3589,evm.model.scaffold182.11288,evm.model.scaffold243.13040,evm.model.scaffold538.18475,evm.model.scaffold26.2622,evm.model.scaffold454.17353,evm.model.scaffold783.20810,evm.model.scaffold610.19371,evm.model.scaffold108.8545,evm.model.scaffold39.3604,evm.model.scaffold372.15910,evm.model.scaffold811.21042,evm.model.scaff…
Biological process	positive regulation of protein maturation	GO:1903319	0.0150659	8	531	0.00127352	0.0172807	8	3.76204	evm.model.scaffold668.19893,evm.model.scaffold27.2685,evm.model.scaffold1432.23534,evm.model.scaffold1122.22625,evm.model.scaffold571.18873,evm.model.scaffold216.12226,evm.model.scaffold224.12439,evm.model.scaffold831.21172,
Biological process	pigment biosynthetic process	GO:0046148	0.0301318	16	531	0.00128248	0.0173756	16	2.37602	evm.model.scaffold280.14000,evm.model.scaffold360.15477,evm.model.scaffold704.20212,evm.model.scaffold59.5863,evm.model.scaffold45.4062,evm.model.scaffold1358.23380,evm.model.scaffold165.10758,evm.model.scaffold934.21786,evm.model.scaffold292.14185,evm.model.scaffold466.17565,evm.model.scaffold708.20241,evm.model.scaffold531.18409,evm.model.scaffold1088.22456,evm.model.scaffold354.15371,evm.model…
Biological process	regulation of macromolecule metabolic process	GO:0060255	0.583804	310	531	0.00128655	0.017404	310	1.12582	evm.model.scaffold1727.23994,evm.model.scaffold233.12647,evm.model.scaffold77.6782,evm.model.scaffold298.14290,evm.model.scaffold306.14449,evm.model.scaffold120.9126,evm.model.scaffold926.21746,evm.model.scaffold390.16245,evm.model.scaffold233.12648,evm.model.scaffold255.13354,evm.model.scaffold320.14682,evm.model.scaffold69.6333,evm.model.scaffold465.17498,evm.model.scaffold564.18774,evm.model.s…
Biological process	T cell differentiation in thymus	GO:0033077	0.0244821	13	531	0.00129206	0.0174517	13	2.6639	evm.model.scaffold59.5863,evm.model.scaffold394.16320,evm.model.scaffold69.6299,evm.model.scaffold321.14720,evm.model.scaffold466.17565,evm.model.scaffold638.19688,evm.model.scaffold181.11247,evm.model.scaffold351.15266,evm.model.scaffold354.15371,evm.model.scaffold27.2662,evm.model.scaffold274.13767,evm.model.scaffold87.7331,evm.model.scaffold104.8408,
Biological process	sensory perception of sound	GO:0007605	0.0508475	27	531	0.00129322	0.0174407	27	1.88639	evm.model.scaffold117.8835,evm.model.scaffold69.6333,evm.model.scaffold69.6332,evm.model.scaffold142.10011,evm.model.scaffold30.2989,evm.model.scaffold676.19971,evm.model.scaffold755.20553,evm.model.scaffold195.11636,evm.model.scaffold117.8888,evm.model.scaffold127.9368,evm.model.scaffold1097.22516,evm.model.scaffold170.10903,evm.model.scaffold705.20217,evm.model.scaffold465.17518,evm.model.scaff…
Biological process	regulation of ion transmembrane transport	GO:0034765	0.0922787	49	531	0.00129607	0.0174525	49	1.56424	evm.model.scaffold778.20743,evm.model.scaffold121.9181,evm.model.scaffold39.3589,evm.model.scaffold182.11288,evm.model.scaffold243.13040,evm.model.scaffold538.18475,evm.model.scaffold26.2622,evm.model.scaffold454.17353,evm.model.scaffold783.20810,evm.model.scaffold610.19371,evm.model.scaffold108.8545,evm.model.scaffold666.19878,evm.model.scaffold39.3604,evm.model.scaffold372.15910,evm.model.scaff…
Biological process	tissue regeneration	GO:0042246	0.0338983	18	531	0.00129894	0.0174644	18	2.23809	evm.model.scaffold233.12647,evm.model.scaffold201.11760,evm.model.scaffold127.9368,evm.model.scaffold59.5863,evm.model.scaffold243.13040,evm.model.scaffold101.8201,evm.model.scaffold50.4590,evm.model.scaffold1115.22607,evm.model.scaffold373.15916,evm.model.scaffold602.19247,evm.model.scaffold12.1229,evm.model.scaffold75.6695,evm.model.scaffold354.15371,evm.model.scaffold308.14483,evm.model.scaffo…
Biological process	cell projection organization	GO:0030030	0.318267	169	531	0.00130011	0.0174536	169	1.22532	evm.model.scaffold30.2966,evm.model.scaffold233.12647,evm.model.scaffold77.6782,evm.model.scaffold298.14290,evm.model.scaffold120.9126,evm.model.scaffold17.1782,evm.model.scaffold926.21746,evm.model.scaffold69.6333,evm.model.scaffold516.18216,evm.model.scaffold69.6332,evm.model.scaffold375.15952,evm.model.scaffold35.3322,evm.model.scaffold117.8847,evm.model.scaffold257.13419,evm.model.scaffold688…
Biological process	response to organonitrogen compound	GO:0010243	0.207156	110	531	0.00130724	0.0175225	110	1.31341	evm.model.scaffold30.2966,evm.model.scaffold233.12647,evm.model.scaffold117.8835,evm.model.scaffold298.14290,evm.model.scaffold17.1782,evm.model.scaffold233.12648,evm.model.scaffold465.17498,evm.model.scaffold564.18774,evm.model.scaffold564.18771,evm.model.scaffold375.15950,evm.model.scaffold778.20743,evm.model.scaffold516.18218,evm.model.scaffold755.20553,evm.model.scaffold113.8721,evm.model.sca…
Biological process	cranial nerve structural organization	GO:0021604	0.0112994	6	531	0.00131809	0.0176411	6	4.89065	evm.model.scaffold247.13101,evm.model.scaffold25.2486,evm.model.scaffold85.7227,evm.model.scaffold234.12776,evm.model.scaffold85.7218,evm.model.scaffold241.12997,
Biological process	striated muscle contraction	GO:0006941	0.0527307	28	531	0.00133617	0.017856	28	1.85721	evm.model.scaffold233.12647,evm.model.scaffold17.1782,evm.model.scaffold926.21746,evm.model.scaffold11.1090,evm.model.scaffold491.17924,evm.model.scaffold182.11288,evm.model.scaffold243.13040,evm.model.scaffold26.2622,evm.model.scaffold465.17515,evm.model.scaffold313.14534,evm.model.scaffold8.878,evm.model.scaffold1115.22607,evm.model.scaffold457.17406,evm.model.scaffold689.20074,evm.model.scaffo…
Biological process	central nervous system neuron development	GO:0021954	0.0301318	16	531	0.0013374	0.0178455	16	2.36644	evm.model.scaffold69.6333,evm.model.scaffold69.6332,evm.model.scaffold195.11633,evm.model.scaffold422.16882,evm.model.scaffold247.13101,evm.model.scaffold261.13531,evm.model.scaffold138.9856,evm.model.scaffold265.13610,evm.model.scaffold1222.22985,evm.model.scaffold224.12439,evm.model.scaffold134.9699,evm.model.scaffold260.13495,evm.model.scaffold1.32,evm.model.scaffold78.6835,evm.model.scaffold8…
Biological process	neuromuscular process controlling balance	GO:0050885	0.0282486	15	531	0.00135279	0.0180235	15	2.44532	evm.model.scaffold117.8835,evm.model.scaffold755.20553,evm.model.scaffold182.11288,evm.model.scaffold538.18475,evm.model.scaffold1122.22625,evm.model.scaffold3.276,evm.model.scaffold666.19878,evm.model.scaffold20.2052,evm.model.scaffold544.18544,evm.model.scaffold54.5530,evm.model.scaffold88.7384,evm.model.scaffold1.32,evm.model.scaffold514.18196,evm.model.scaffold54.5545,evm.model.scaffold112.86…
Biological process	regulation of synaptic transmission, glutamatergic	GO:0051966	0.0244821	13	531	0.00135893	0.0180781	13	2.6491	evm.model.scaffold298.14290,evm.model.scaffold89.7664,evm.model.scaffold39.3591,evm.model.scaffold21.2089,evm.model.scaffold705.20217,evm.model.scaffold3.276,evm.model.scaffold811.21042,evm.model.scaffold265.13610,evm.model.scaffold42.3889,evm.model.scaffold16.1696,evm.model.scaffold88.7384,evm.model.scaffold90.7693,evm.model.scaffold45.3968,
Biological process	negative regulation of cell motility	GO:2000146	0.0621469	33	531	0.0013744	0.0182563	33	1.75171	evm.model.scaffold30.2966,evm.model.scaffold233.12647,evm.model.scaffold429.16970,evm.model.scaffold524.18311,evm.model.scaffold123.9227,evm.model.scaffold685.20043,evm.model.scaffold50.4591,evm.model.scaffold50.4573,evm.model.scaffold414.16778,evm.model.scaffold3.276,evm.model.scaffold666.19878,evm.model.scaffold943.21833,evm.model.scaffold6.818,evm.model.scaffold321.14713,evm.model.scaffold290.…
Biological process	regulation of astrocyte differentiation	GO:0048710	0.0150659	8	531	0.00138391	0.018355	8	3.71442	evm.model.scaffold351.15333,evm.model.scaffold1222.22985,evm.model.scaffold435.17081,evm.model.scaffold224.12439,evm.model.scaffold12.1329,evm.model.scaffold260.13495,evm.model.scaffold28.2738,evm.model.scaffold20.1997,
Biological process	peptidyl-L-cysteine S-palmitoylation	GO:0018230	0.0094162	5	531	0.00139667	0.0184965	5	5.9161	evm.model.scaffold802.20920,evm.model.scaffold70.6373,evm.model.scaffold749.20525,evm.model.scaffold749.20523,evm.model.scaffold34.3192,
Biological process	peptidyl-S-diacylglycerol-L-cysteine biosynthetic process from peptidyl-cysteine	GO:0018231	0.0094162	5	531	0.00139667	0.0184965	5	5.9161	evm.model.scaffold802.20920,evm.model.scaffold70.6373,evm.model.scaffold749.20525,evm.model.scaffold749.20523,evm.model.scaffold34.3192,
Biological process	sialylation	GO:0097503	0.0094162	5	531	0.00139667	0.0184965	5	5.9161	evm.model.scaffold516.18216,evm.model.scaffold123.9227,evm.model.scaffold1165.22769,evm.model.scaffold67.6205,evm.model.scaffold646.19745,
Biological process	regulated exocytosis	GO:0045055	0.13371	71	531	0.0014017	0.0184798	71	1.427	evm.model.scaffold77.6782,evm.model.scaffold926.21746,evm.model.scaffold320.14682,evm.model.scaffold69.6333,evm.model.scaffold69.6332,evm.model.scaffold375.15950,evm.model.scaffold1229.23004,evm.model.scaffold375.15952,evm.model.scaffold121.9181,evm.model.scaffold195.11636,evm.model.scaffold422.16882,evm.model.scaffold117.8888,evm.model.scaffold1579.23795,evm.model.scaffold491.17924,evm.model.sca…
Biological process	trabecula morphogenesis	GO:0061383	0.0207156	11	531	0.00142372	0.0187421	11	2.92376	evm.model.scaffold320.14682,evm.model.scaffold35.3322,evm.model.scaffold257.13419,evm.model.scaffold429.16970,evm.model.scaffold367.15739,evm.model.scaffold193.11588,evm.model.scaffold685.20043,evm.model.scaffold610.19371,evm.model.scaffold414.16778,evm.model.scaffold484.17805,evm.model.scaffold840.21268,
Biological process	salivary gland development	GO:0007431	0.0244821	13	531	0.00142866	0.0187791	13	2.63446	evm.model.scaffold63.6075,evm.model.scaffold668.19893,evm.model.scaffold127.9368,evm.model.scaffold166.10795,evm.model.scaffold247.13101,evm.model.scaffold1608.23837,evm.model.scaffold602.19247,evm.model.scaffold586.19075,evm.model.scaffold181.11247,evm.model.scaffold134.9699,evm.model.scaffold71.6509,evm.model.scaffold85.7227,evm.model.scaffold85.7218,
Biological process	regulation of chemotaxis	GO:0050920	0.0602637	32	531	0.00143267	0.0188038	32	1.76505	evm.model.scaffold233.12647,evm.model.scaffold120.9126,evm.model.scaffold17.1782,evm.model.scaffold429.16970,evm.model.scaffold524.18311,evm.model.scaffold127.9382,evm.model.scaffold118.8991,evm.model.scaffold127.9368,evm.model.scaffold39.3591,evm.model.scaffold685.20043,evm.model.scaffold69.6292,evm.model.scaffold247.13101,evm.model.scaffold108.8545,evm.model.scaffold39.3604,evm.model.scaffold48…
Biological process	regulation of peptide secretion	GO:0002791	0.0602637	32	531	0.00143267	0.0188038	32	1.76505	evm.model.scaffold233.12647,evm.model.scaffold77.6782,evm.model.scaffold298.14290,evm.model.scaffold1204.22913,evm.model.scaffold121.9181,evm.model.scaffold195.11633,evm.model.scaffold422.16882,evm.model.scaffold865.21421,evm.model.scaffold82.7109,evm.model.scaffold182.11288,evm.model.scaffold57.5666,evm.model.scaffold50.4573,evm.model.scaffold610.19365,evm.model.scaffold62.5967,evm.model.scaffol…
Biological process	negative regulation of cellular response to growth factor stimulus	GO:0090288	0.0301318	16	531	0.0014532	0.0190166	16	2.34751	evm.model.scaffold30.2966,evm.model.scaffold127.9382,evm.model.scaffold59.5863,evm.model.scaffold298.14273,evm.model.scaffold685.20043,evm.model.scaffold414.16778,evm.model.scaffold86.7243,evm.model.scaffold804.20949,evm.model.scaffold134.9699,evm.model.scaffold227.12492,evm.model.scaffold466.17527,evm.model.scaffold354.15371,evm.model.scaffold104.8408,evm.model.scaffold173.11001,evm.model.scaffo…
Biological process	positive regulation of stress-activated protein kinase signaling cascade	GO:0070304	0.0320151	17	531	0.00146489	0.0191413	17	2.27576	evm.model.scaffold233.12647,evm.model.scaffold77.6782,evm.model.scaffold778.20743,evm.model.scaffold865.21421,evm.model.scaffold59.5863,evm.model.scaffold166.10795,evm.model.scaffold148.10294,evm.model.scaffold101.8201,evm.model.scaffold1432.23535,evm.model.scaffold50.4590,evm.model.scaffold156.10553,evm.model.scaffold351.15266,evm.model.scaffold354.15371,evm.model.scaffold308.14483,evm.model.sca…
Biological process	axon regeneration	GO:0031103	0.0282486	15	531	0.00147675	0.0192677	15	2.42378	evm.model.scaffold3.276,evm.model.scaffold351.15333,evm.model.scaffold290.14172,evm.model.scaffold41.3757,evm.model.scaffold1222.22985,evm.model.scaffold638.19692,evm.model.scaffold37.3468,evm.model.scaffold840.21238,evm.model.scaffold227.12492,evm.model.scaffold260.13495,evm.model.scaffold43.3904,evm.model.scaffold234.12776,evm.model.scaffold526.18332,evm.model.scaffold840.21268,evm.model.scaffo…
Biological process	directional locomotion	GO:0033058	0.0112994	6	531	0.00148144	0.0193003	6	4.78433	evm.model.scaffold926.21746,evm.model.scaffold698.20173,evm.model.scaffold1115.22607,evm.model.scaffold468.17590,evm.model.scaffold543.18529,evm.model.scaffold112.8678,
Biological process	response to oxygen levels	GO:0070482	0.0903955	48	531	0.00148875	0.019367	48	1.56223	evm.model.scaffold233.12647,evm.model.scaffold17.1782,evm.model.scaffold926.21746,evm.model.scaffold255.13354,evm.model.scaffold375.15950,evm.model.scaffold257.13419,evm.model.scaffold62.6004,evm.model.scaffold387.16190,evm.model.scaffold367.15739,evm.model.scaffold121.9181,evm.model.scaffold1015.22174,evm.model.scaffold170.10903,evm.model.scaffold71.6458,evm.model.scaffold472.17645,evm.model.sca…
Biological process	SMAD protein signal transduction	GO:0060395	0.0244821	13	531	0.00150134	0.0194446	13	2.61999	evm.model.scaffold233.12647,evm.model.scaffold69.6333,evm.model.scaffold69.6332,evm.model.scaffold375.15950,evm.model.scaffold35.3322,evm.model.scaffold166.10795,evm.model.scaffold413.16776,evm.model.scaffold393.16282,evm.model.scaffold290.14172,evm.model.scaffold638.19692,evm.model.scaffold435.17081,evm.model.scaffold308.14483,evm.model.scaffold54.5565,
Biological process	regulation of protein metabolic process	GO:0051246	0.333333	177	531	0.00150155	0.0194188	177	1.21329	evm.model.scaffold1727.23994,evm.model.scaffold233.12647,evm.model.scaffold926.21746,evm.model.scaffold390.16245,evm.model.scaffold233.12648,evm.model.scaffold69.6333,evm.model.scaffold564.18774,evm.model.scaffold69.6332,evm.model.scaffold564.18771,evm.model.scaffold227.12504,evm.model.scaffold516.18218,evm.model.scaffold1018.22191,evm.model.scaffold429.16970,evm.model.scaffold63.6075,evm.model.s…
Biological process	regulation of transmembrane transport	GO:0034762	0.107345	57	531	0.00150583	0.0194457	57	1.49553	evm.model.scaffold233.12648,evm.model.scaffold778.20743,evm.model.scaffold121.9181,evm.model.scaffold280.14000,evm.model.scaffold120.9152,evm.model.scaffold39.3589,evm.model.scaffold182.11288,evm.model.scaffold243.13040,evm.model.scaffold538.18475,evm.model.scaffold546.18581,evm.model.scaffold26.2622,evm.model.scaffold454.17353,evm.model.scaffold783.20810,evm.model.scaffold610.19371,evm.model.sca…
Biological process	cell junction maintenance	GO:0034331	0.0207156	11	531	0.00150905	0.0194589	11	2.90272	evm.model.scaffold69.6333,evm.model.scaffold69.6332,evm.model.scaffold117.8847,evm.model.scaffold705.20217,evm.model.scaffold290.14172,evm.model.scaffold901.21605,evm.model.scaffold25.2498,evm.model.scaffold41.3742,evm.model.scaffold88.7384,evm.model.scaffold85.7215,evm.model.scaffold519.18258,
Biological process	glycosaminoglycan metabolic process	GO:0030203	0.0376648	20	531	0.00153411	0.019753	20	2.102	evm.model.scaffold564.18774,evm.model.scaffold160.10630,evm.model.scaffold1165.22769,evm.model.scaffold148.10359,evm.model.scaffold234.12856,evm.model.scaffold593.19156,evm.model.scaffold764.20654,evm.model.scaffold804.20949,evm.model.scaffold162.10694,evm.model.scaffold191.11537,evm.model.scaffold191.11538,evm.model.scaffold931.21776,evm.model.scaffold16.1696,evm.model.scaffold354.15371,evm.mode…
Biological process	aminoglycan metabolic process	GO:0006022	0.0433145	23	531	0.00155211	0.0199557	23	1.98037	evm.model.scaffold564.18774,evm.model.scaffold160.10630,evm.model.scaffold10.1051,evm.model.scaffold39.3607,evm.model.scaffold1165.22769,evm.model.scaffold148.10359,evm.model.scaffold234.12856,evm.model.scaffold593.19156,evm.model.scaffold764.20654,evm.model.scaffold804.20949,evm.model.scaffold162.10694,evm.model.scaffold191.11537,evm.model.scaffold191.11538,evm.model.scaffold931.21776,evm.model.…
Biological process	B cell proliferation	GO:0042100	0.0338983	18	531	0.00156621	0.0201077	18	2.20079	evm.model.scaffold77.6782,evm.model.scaffold257.13419,evm.model.scaffold450.17285,evm.model.scaffold367.15739,evm.model.scaffold865.21421,evm.model.scaffold48.4348,evm.model.scaffold1432.23535,evm.model.scaffold20.2039,evm.model.scaffold93.7815,evm.model.scaffold391.16267,evm.model.scaffold351.15333,evm.model.scaffold248.13116,evm.model.scaffold294.14213,evm.model.scaffold351.15266,evm.model.scaf…
Biological process	response to nitrogen compound	GO:1901698	0.218456	116	531	0.00157754	0.0202237	116	1.29445	evm.model.scaffold30.2966,evm.model.scaffold233.12647,evm.model.scaffold117.8835,evm.model.scaffold298.14290,evm.model.scaffold17.1782,evm.model.scaffold233.12648,evm.model.scaffold465.17498,evm.model.scaffold564.18774,evm.model.scaffold564.18771,evm.model.scaffold375.15950,evm.model.scaffold778.20743,evm.model.scaffold516.18218,evm.model.scaffold450.17285,evm.model.scaffold755.20553,evm.model.sc…
Biological process	adenohypophysis development	GO:0021984	0.0131827	7	531	0.00159054	0.0203608	7	4.07554	evm.model.scaffold688.20066,evm.model.scaffold384.16141,evm.model.scaffold384.16138,evm.model.scaffold265.13610,evm.model.scaffold265.13608,evm.model.scaffold104.8408,evm.model.scaffold20.1997,
Biological process	positive regulation of programmed cell death	GO:0043068	0.114878	61	531	0.00159833	0.0204309	61	1.46816	evm.model.scaffold77.6782,evm.model.scaffold298.14290,evm.model.scaffold465.17498,evm.model.scaffold257.13419,evm.model.scaffold83.7126,evm.model.scaffold367.15739,evm.model.scaffold426.16937,evm.model.scaffold195.11636,evm.model.scaffold89.7664,evm.model.scaffold123.9227,evm.model.scaffold29.2803,evm.model.scaffold865.21421,evm.model.scaffold80.7030,evm.model.scaffold1430.23528,evm.model.scaffol…
Biological process	dopamine transport	GO:0015872	0.0207156	11	531	0.00159853	0.0204038	11	2.88199	evm.model.scaffold120.9126,evm.model.scaffold564.18774,evm.model.scaffold778.20743,evm.model.scaffold82.7109,evm.model.scaffold71.6458,evm.model.scaffold783.20810,evm.model.scaffold435.17065,evm.model.scaffold265.13610,evm.model.scaffold25.2486,evm.model.scaffold641.19727,evm.model.scaffold234.12776,
Biological process	molting cycle, chitin-based cuticle	GO:0007591	0.0094162	5	531	0.00161869	0.0206312	5	5.73123	evm.model.scaffold384.16141,evm.model.scaffold384.16138,evm.model.scaffold54.5530,evm.model.scaffold6.676,evm.model.scaffold181.11247,
Biological process	presynaptic active zone organization	GO:1990709	0.0094162	5	531	0.00161869	0.0206312	5	5.73123	evm.model.scaffold69.6333,evm.model.scaffold69.6332,evm.model.scaffold25.2498,evm.model.scaffold41.3742,evm.model.scaffold85.7215,
Biological process	epithelial cell-cell adhesion	GO:0090136	0.0150659	8	531	0.00162744	0.020683	8	3.6227	evm.model.scaffold233.12647,evm.model.scaffold491.17924,evm.model.scaffold465.17518,evm.model.scaffold695.20137,evm.model.scaffold308.14483,evm.model.scaffold1827.24084,evm.model.scaffold1523.23716,evm.model.scaffold486.17828,
Biological process	response to muscle activity	GO:0014850	0.0150659	8	531	0.00162744	0.020683	8	3.6227	evm.model.scaffold243.13040,evm.model.scaffold75.6653,evm.model.scaffold6.795,evm.model.scaffold6.675,evm.model.scaffold78.6870,evm.model.scaffold28.2757,evm.model.scaffold891.21560,evm.model.scaffold47.4138,
Biological process	metanephros development	GO:0001656	0.0301318	16	531	0.00164265	0.0208164	16	2.31967	evm.model.scaffold120.9126,evm.model.scaffold685.20043,evm.model.scaffold21.2089,evm.model.scaffold338.15039,evm.model.scaffold101.8201,evm.model.scaffold45.4005,evm.model.scaffold435.17065,evm.model.scaffold373.15916,evm.model.scaffold41.3757,evm.model.scaffold78.6910,evm.model.scaffold134.9699,evm.model.scaffold308.14483,evm.model.scaffold71.6509,evm.model.scaffold79.6968,evm.model.scaffold104.…
Biological process	protein palmitoylation	GO:0018345	0.0112994	6	531	0.00165976	0.021003	6	4.68253	evm.model.scaffold802.20920,evm.model.scaffold16.1696,evm.model.scaffold70.6373,evm.model.scaffold749.20525,evm.model.scaffold749.20523,evm.model.scaffold34.3192,
Biological process	pulmonary valve development	GO:0003177	0.0112994	6	531	0.00165976	0.021003	6	4.68253	evm.model.scaffold257.13419,evm.model.scaffold367.15739,evm.model.scaffold391.16267,evm.model.scaffold134.9699,evm.model.scaffold75.6695,evm.model.scaffold840.21251,
Biological process	regulation of protein secretion	GO:0050708	0.0734463	39	531	0.00167695	0.0211598	39	1.64427	evm.model.scaffold233.12647,evm.model.scaffold77.6782,evm.model.scaffold926.21746,evm.model.scaffold778.20743,evm.model.scaffold1204.22913,evm.model.scaffold121.9181,evm.model.scaffold422.16882,evm.model.scaffold408.16694,evm.model.scaffold82.7109,evm.model.scaffold182.11288,evm.model.scaffold57.5666,evm.model.scaffold166.10795,evm.model.scaffold12.1294,evm.model.scaffold1122.22625,evm.model.scaf…
Biological process	endodermal cell differentiation	GO:0035987	0.0207156	11	531	0.00169229	0.0213229	11	2.86155	evm.model.scaffold142.10011,evm.model.scaffold30.2989,evm.model.scaffold63.6075,evm.model.scaffold127.9368,evm.model.scaffold571.18873,evm.model.scaffold298.14312,evm.model.scaffold41.3757,evm.model.scaffold78.6910,evm.model.scaffold308.14483,evm.model.scaffold54.5565,evm.model.scaffold41.3773,
Biological process	response to estradiol	GO:0032355	0.0527307	28	531	0.0016924	0.0212938	28	1.82747	evm.model.scaffold233.12647,evm.model.scaffold524.18311,evm.model.scaffold120.9152,evm.model.scaffold578.19012,evm.model.scaffold243.13040,evm.model.scaffold101.8201,evm.model.scaffold50.4590,evm.model.scaffold20.2039,evm.model.scaffold783.20810,evm.model.scaffold414.16778,evm.model.scaffold6.819,evm.model.scaffold42.3889,evm.model.scaffold37.3468,evm.model.scaffold980.22013,evm.model.scaffold16.…
Biological process	cardiac septum development	GO:0003279	0.0320151	17	531	0.00170974	0.0214814	17	2.24301	evm.model.scaffold257.13419,evm.model.scaffold450.17285,evm.model.scaffold367.15739,evm.model.scaffold59.5863,evm.model.scaffold166.10795,evm.model.scaffold1122.22625,evm.model.scaffold14.1522,evm.model.scaffold351.15211,evm.model.scaffold586.19075,evm.model.scaffold544.18544,evm.model.scaffold134.9699,evm.model.scaffold75.6695,evm.model.scaffold466.17527,evm.model.scaffold354.15371,evm.model.sca…
Biological process	neuron projection regeneration	GO:0031102	0.0301318	16	531	0.00171024	0.021457	16	2.31054	evm.model.scaffold3.276,evm.model.scaffold351.15333,evm.model.scaffold290.14172,evm.model.scaffold41.3757,evm.model.scaffold1222.22985,evm.model.scaffold638.19692,evm.model.scaffold37.3468,evm.model.scaffold840.21238,evm.model.scaffold227.12492,evm.model.scaffold260.13495,evm.model.scaffold43.3904,evm.model.scaffold72.6527,evm.model.scaffold234.12776,evm.model.scaffold526.18332,evm.model.scaffold…
Biological process	detection of mechanical stimulus	GO:0050982	0.0244821	13	531	0.001738	0.0217744	13	2.5775	evm.model.scaffold17.1782,evm.model.scaffold926.21746,evm.model.scaffold142.10011,evm.model.scaffold30.2989,evm.model.scaffold755.20553,evm.model.scaffold195.11636,evm.model.scaffold170.10903,evm.model.scaffold1115.22607,evm.model.scaffold28.2757,evm.model.scaffold468.17590,evm.model.scaffold543.18529,evm.model.scaffold221.12377,evm.model.scaffold234.12776,
Biological process	nephron epithelium development	GO:0072009	0.0376648	20	531	0.00175486	0.0219544	20	2.07818	evm.model.scaffold30.2966,evm.model.scaffold120.9126,evm.model.scaffold63.6075,evm.model.scaffold685.20043,evm.model.scaffold42.3806,evm.model.scaffold538.18475,evm.model.scaffold101.8201,evm.model.scaffold45.4005,evm.model.scaffold435.17065,evm.model.scaffold373.15916,evm.model.scaffold41.3757,evm.model.scaffold75.6695,evm.model.scaffold466.17527,evm.model.scaffold308.14483,evm.model.scaffold484…
Biological process	positive regulation of biomineral tissue development	GO:0070169	0.0188324	10	531	0.00176686	0.0220732	10	3.03139	evm.model.scaffold233.12647,evm.model.scaffold810.21038,evm.model.scaffold121.9181,evm.model.scaffold755.20553,evm.model.scaffold308.14483,evm.model.scaffold484.17805,evm.model.scaffold275.13884,evm.model.scaffold333.14976,evm.model.scaffold333.14978,evm.model.scaffold104.8408,
Biological process	positive regulation of biomineralization	GO:0110151	0.0188324	10	531	0.00176686	0.0220732	10	3.03139	evm.model.scaffold233.12647,evm.model.scaffold810.21038,evm.model.scaffold121.9181,evm.model.scaffold755.20553,evm.model.scaffold308.14483,evm.model.scaffold484.17805,evm.model.scaffold275.13884,evm.model.scaffold333.14976,evm.model.scaffold333.14978,evm.model.scaffold104.8408,
Biological process	blood vessel endothelial cell migration	GO:0043534	0.0320151	17	531	0.00177607	0.0221256	17	2.23497	evm.model.scaffold123.9227,evm.model.scaffold127.9368,evm.model.scaffold685.20043,evm.model.scaffold21.2089,evm.model.scaffold45.4005,evm.model.scaffold1122.22625,evm.model.scaffold412.16756,evm.model.scaffold12.1145,evm.model.scaffold39.3604,evm.model.scaffold312.14524,evm.model.scaffold156.10553,evm.model.scaffold134.9699,evm.model.scaffold85.7182,evm.model.scaffold71.6509,evm.model.scaffold18.…
Biological process	cerebellum development	GO:0021549	0.039548	21	531	0.00178798	0.0222426	21	2.03239	evm.model.scaffold233.12648,evm.model.scaffold69.6333,evm.model.scaffold69.6332,evm.model.scaffold83.7126,evm.model.scaffold755.20553,evm.model.scaffold422.16882,evm.model.scaffold699.20193,evm.model.scaffold394.16320,evm.model.scaffold413.16776,evm.model.scaffold101.8201,evm.model.scaffold50.4590,evm.model.scaffold1122.22625,evm.model.scaffold544.18544,evm.model.scaffold901.21605,evm.model.scaff…
Biological process	metencephalon development	GO:0022037	0.0414313	22	531	0.00180334	0.0224021	22	1.99249	evm.model.scaffold233.12648,evm.model.scaffold69.6333,evm.model.scaffold69.6332,evm.model.scaffold83.7126,evm.model.scaffold755.20553,evm.model.scaffold422.16882,evm.model.scaffold699.20193,evm.model.scaffold394.16320,evm.model.scaffold413.16776,evm.model.scaffold101.8201,evm.model.scaffold50.4590,evm.model.scaffold1122.22625,evm.model.scaffold544.18544,evm.model.scaffold901.21605,evm.model.scaff…
Biological process	regulation of cell-matrix adhesion	GO:0001952	0.0338983	18	531	0.00181226	0.0224813	18	2.17183	evm.model.scaffold69.6332,evm.model.scaffold123.9227,evm.model.scaffold491.17924,evm.model.scaffold39.3591,evm.model.scaffold685.20043,evm.model.scaffold394.16320,evm.model.scaffold571.18873,evm.model.scaffold457.17402,evm.model.scaffold321.14713,evm.model.scaffold47.4138,evm.model.scaffold72.6527,evm.model.scaffold45.3968,evm.model.scaffold104.8408,evm.model.scaffold831.21172,evm.model.scaffold8…
Biological process	brain-derived neurotrophic factor receptor signaling pathway	GO:0031547	0.0094162	5	531	0.00186555	0.0231098	5	5.55755	evm.model.scaffold257.13419,evm.model.scaffold367.15739,evm.model.scaffold250.13244,evm.model.scaffold1222.22985,evm.model.scaffold260.13495,
Biological process	bone morphogenesis	GO:0060349	0.0338983	18	531	0.00187863	0.0231418	18	2.16471	evm.model.scaffold233.12647,evm.model.scaffold564.18774,evm.model.scaffold193.11588,evm.model.scaffold160.10630,evm.model.scaffold685.20043,evm.model.scaffold57.5666,evm.model.scaffold14.1522,evm.model.scaffold414.16778,evm.model.scaffold86.7243,evm.model.scaffold571.18873,evm.model.scaffold351.15211,evm.model.scaffold234.12856,evm.model.scaffold638.19688,evm.model.scaffold695.20137,evm.model.sca…
Biological process	positive regulation of axon extension	GO:0045773	0.0207156	11	531	0.00189331	0.0232901	11	2.82153	evm.model.scaffold69.6332,evm.model.scaffold491.17924,evm.model.scaffold12.1152,evm.model.scaffold165.10758,evm.model.scaffold42.3889,evm.model.scaffold1222.22985,evm.model.scaffold37.3468,evm.model.scaffold708.20241,evm.model.scaffold260.13495,evm.model.scaffold78.6835,evm.model.scaffold30.2908,
Biological process	regulation of SMAD protein signal transduction	GO:0060390	0.0131827	7	531	0.00191027	0.023466	7	3.95014	evm.model.scaffold233.12647,evm.model.scaffold69.6333,evm.model.scaffold69.6332,evm.model.scaffold35.3322,evm.model.scaffold638.19692,evm.model.scaffold435.17081,evm.model.scaffold308.14483,
Biological process	negative regulation of natural killer cell mediated cytotoxicity	GO:0045953	0.0131827	7	531	0.00191027	0.023466	7	3.95014	evm.model.scaffold792.20877,evm.model.scaffold12.1294,evm.model.scaffold465.17518,evm.model.scaffold617.19445,evm.model.scaffold1827.24084,evm.model.scaffold1523.23716,evm.model.scaffold130.9537,
Biological process	regulation of skeletal muscle contraction	GO:0014819	0.0131827	7	531	0.00191027	0.023466	7	3.95014	evm.model.scaffold11.1090,evm.model.scaffold243.13040,evm.model.scaffold465.17515,evm.model.scaffold457.17406,evm.model.scaffold333.14976,evm.model.scaffold333.14978,evm.model.scaffold543.18529,
Biological process	positive regulation of cell death	GO:0010942	0.126177	67	531	0.00194355	0.0237754	67	1.42632	evm.model.scaffold233.12647,evm.model.scaffold77.6782,evm.model.scaffold298.14290,evm.model.scaffold465.17498,evm.model.scaffold516.18216,evm.model.scaffold257.13419,evm.model.scaffold83.7126,evm.model.scaffold367.15739,evm.model.scaffold426.16937,evm.model.scaffold195.11636,evm.model.scaffold89.7664,evm.model.scaffold123.9227,evm.model.scaffold29.2803,evm.model.scaffold865.21421,evm.model.scaffo…
Biological process	negative regulation of blood vessel morphogenesis	GO:2000181	0.0357815	19	531	0.00195293	0.0238571	19	2.10549	evm.model.scaffold30.2966,evm.model.scaffold429.16970,evm.model.scaffold121.9181,evm.model.scaffold123.9227,evm.model.scaffold193.11588,evm.model.scaffold865.21421,evm.model.scaffold450.17270,evm.model.scaffold20.2014,evm.model.scaffold298.14312,evm.model.scaffold141.9977,evm.model.scaffold294.14213,evm.model.scaffold198.11707,evm.model.scaffold85.7182,evm.model.scaffold27.2662,evm.model.scaffold…
Biological process	heart process	GO:0003015	0.0715631	38	531	0.00196716	0.0239978	38	1.64174	evm.model.scaffold233.12647,evm.model.scaffold17.1782,evm.model.scaffold926.21746,evm.model.scaffold69.6333,evm.model.scaffold69.6332,evm.model.scaffold524.18311,evm.model.scaffold755.20553,evm.model.scaffold491.17924,evm.model.scaffold182.11288,evm.model.scaffold166.10795,evm.model.scaffold243.13040,evm.model.scaffold26.2622,evm.model.scaffold12.1152,evm.model.scaffold313.14534,evm.model.scaffol…
Biological process	negative regulation of cell adhesion	GO:0007162	0.0677966	36	531	0.00198298	0.0241573	36	1.66727	evm.model.scaffold30.2966,evm.model.scaffold233.12647,evm.model.scaffold62.6004,evm.model.scaffold450.17285,evm.model.scaffold123.9227,evm.model.scaffold360.15477,evm.model.scaffold422.16882,evm.model.scaffold117.8888,evm.model.scaffold59.5863,evm.model.scaffold39.3591,evm.model.scaffold1653.23894,evm.model.scaffold50.4591,evm.model.scaffold12.1294,evm.model.scaffold247.13101,evm.model.scaffold3.…
Biological process	heart contraction	GO:0060047	0.0696798	37	531	0.00199816	0.0243087	37	1.65305	evm.model.scaffold233.12647,evm.model.scaffold17.1782,evm.model.scaffold926.21746,evm.model.scaffold69.6333,evm.model.scaffold69.6332,evm.model.scaffold524.18311,evm.model.scaffold755.20553,evm.model.scaffold491.17924,evm.model.scaffold182.11288,evm.model.scaffold166.10795,evm.model.scaffold243.13040,evm.model.scaffold26.2622,evm.model.scaffold12.1152,evm.model.scaffold313.14534,evm.model.scaffol…
Biological process	negative regulation of vasculature development	GO:1901343	0.0357815	19	531	0.00202051	0.0245467	19	2.09915	evm.model.scaffold30.2966,evm.model.scaffold429.16970,evm.model.scaffold121.9181,evm.model.scaffold123.9227,evm.model.scaffold193.11588,evm.model.scaffold865.21421,evm.model.scaffold450.17270,evm.model.scaffold20.2014,evm.model.scaffold298.14312,evm.model.scaffold141.9977,evm.model.scaffold294.14213,evm.model.scaffold198.11707,evm.model.scaffold85.7182,evm.model.scaffold27.2662,evm.model.scaffold…
Biological process	metanephric nephron development	GO:0072210	0.0150659	8	531	0.00205501	0.0249315	8	3.49332	evm.model.scaffold685.20043,evm.model.scaffold435.17065,evm.model.scaffold373.15916,evm.model.scaffold41.3757,evm.model.scaffold71.6509,evm.model.scaffold79.6968,evm.model.scaffold104.8408,evm.model.scaffold20.1997,
Biological process	glycosaminoglycan biosynthetic process	GO:0006024	0.0282486	15	531	0.00207201	0.0251032	15	2.34127	evm.model.scaffold564.18774,evm.model.scaffold160.10630,evm.model.scaffold1165.22769,evm.model.scaffold234.12856,evm.model.scaffold764.20654,evm.model.scaffold804.20949,evm.model.scaffold931.21776,evm.model.scaffold16.1696,evm.model.scaffold354.15371,evm.model.scaffold71.6509,evm.model.scaffold1418.23505,evm.model.scaffold24.2296,evm.model.scaffold543.18529,evm.model.scaffold70.6359,evm.model.sca…
Biological process	transmembrane transport	GO:0055085	0.188324	100	531	0.00207316	0.0250826	100	1.31705	evm.model.scaffold233.12647,evm.model.scaffold117.8835,evm.model.scaffold233.12648,evm.model.scaffold778.20743,evm.model.scaffold516.18218,evm.model.scaffold481.17764,evm.model.scaffold457.17397,evm.model.scaffold426.16937,evm.model.scaffold121.9181,evm.model.scaffold755.20553,evm.model.scaffold1994.24173,evm.model.scaffold280.14000,evm.model.scaffold1015.22174,evm.model.scaffold704.20212,evm.mod…
Biological process	positive regulation of developmental growth	GO:0048639	0.0527307	28	531	0.002075	0.0250706	28	1.80182	evm.model.scaffold17.1782,evm.model.scaffold69.6333,evm.model.scaffold69.6332,evm.model.scaffold127.9368,evm.model.scaffold491.17924,evm.model.scaffold120.9152,evm.model.scaffold82.7109,evm.model.scaffold298.14273,evm.model.scaffold243.13040,evm.model.scaffold12.1152,evm.model.scaffold457.17402,evm.model.scaffold1608.23837,evm.model.scaffold457.17406,evm.model.scaffold165.10758,evm.model.scaffold…
Biological process	regulation of peptide transport	GO:0090087	0.0602637	32	531	0.00208311	0.0251342	32	1.72358	evm.model.scaffold233.12647,evm.model.scaffold77.6782,evm.model.scaffold298.14290,evm.model.scaffold1204.22913,evm.model.scaffold121.9181,evm.model.scaffold195.11633,evm.model.scaffold422.16882,evm.model.scaffold865.21421,evm.model.scaffold82.7109,evm.model.scaffold182.11288,evm.model.scaffold57.5666,evm.model.scaffold50.4573,evm.model.scaffold610.19365,evm.model.scaffold62.5967,evm.model.scaffol…
Biological process	negative regulation of natural killer cell mediated immunity	GO:0002716	0.0131827	7	531	0.00208773	0.0251554	7	3.89029	evm.model.scaffold792.20877,evm.model.scaffold12.1294,evm.model.scaffold465.17518,evm.model.scaffold617.19445,evm.model.scaffold1827.24084,evm.model.scaffold1523.23716,evm.model.scaffold130.9537,
Biological process	cardiac ventricle development	GO:0003231	0.0338983	18	531	0.00209015	0.0251503	18	2.14363	evm.model.scaffold257.13419,evm.model.scaffold142.10011,evm.model.scaffold30.2989,evm.model.scaffold367.15739,evm.model.scaffold491.17924,evm.model.scaffold59.5863,evm.model.scaffold243.13040,evm.model.scaffold45.4005,evm.model.scaffold14.1522,evm.model.scaffold414.16778,evm.model.scaffold351.15211,evm.model.scaffold764.20654,evm.model.scaffold67.6219,evm.model.scaffold134.9699,evm.model.scaffold…
Biological process	regulation of cold-induced thermogenesis	GO:0120161	0.0338983	18	531	0.00209015	0.0251503	18	2.14363	evm.model.scaffold77.6782,evm.model.scaffold17.1782,evm.model.scaffold465.17498,evm.model.scaffold63.6075,evm.model.scaffold29.2803,evm.model.scaffold48.4348,evm.model.scaffold120.9059,evm.model.scaffold45.4005,evm.model.scaffold148.10260,evm.model.scaffold12.1152,evm.model.scaffold48.4287,evm.model.scaffold811.21044,evm.model.scaffold373.15916,evm.model.scaffold466.17562,evm.model.scaffold116.87…
Biological process	cold-induced thermogenesis	GO:0106106	0.0338983	18	531	0.00209015	0.0251503	18	2.14363	evm.model.scaffold77.6782,evm.model.scaffold17.1782,evm.model.scaffold465.17498,evm.model.scaffold63.6075,evm.model.scaffold29.2803,evm.model.scaffold48.4348,evm.model.scaffold120.9059,evm.model.scaffold45.4005,evm.model.scaffold148.10260,evm.model.scaffold12.1152,evm.model.scaffold48.4287,evm.model.scaffold811.21044,evm.model.scaffold373.15916,evm.model.scaffold466.17562,evm.model.scaffold116.87…
Biological process	positive regulation of vasculature development	GO:1904018	0.039548	21	531	0.00209338	0.0250865	21	2.00593	evm.model.scaffold17.1782,evm.model.scaffold120.9152,evm.model.scaffold170.10903,evm.model.scaffold685.20043,evm.model.scaffold27.2685,evm.model.scaffold69.6292,evm.model.scaffold1432.23535,evm.model.scaffold546.18581,evm.model.scaffold45.4005,evm.model.scaffold403.16491,evm.model.scaffold412.16756,evm.model.scaffold414.16778,evm.model.scaffold248.13205,evm.model.scaffold156.10553,evm.model.scaff…
Biological process	positive regulation of angiogenesis	GO:0045766	0.039548	21	531	0.00209338	0.0250865	21	2.00593	evm.model.scaffold17.1782,evm.model.scaffold120.9152,evm.model.scaffold170.10903,evm.model.scaffold685.20043,evm.model.scaffold27.2685,evm.model.scaffold69.6292,evm.model.scaffold1432.23535,evm.model.scaffold546.18581,evm.model.scaffold45.4005,evm.model.scaffold403.16491,evm.model.scaffold412.16756,evm.model.scaffold414.16778,evm.model.scaffold248.13205,evm.model.scaffold156.10553,evm.model.scaff…
Biological process	ventricular cardiac muscle tissue development	GO:0003229	0.0207156	11	531	0.00211336	0.025121	11	2.78261	evm.model.scaffold30.2966,evm.model.scaffold142.10011,evm.model.scaffold30.2989,evm.model.scaffold491.17924,evm.model.scaffold243.13040,evm.model.scaffold45.4005,evm.model.scaffold67.6219,evm.model.scaffold294.14213,evm.model.scaffold891.21560,evm.model.scaffold41.3679,evm.model.scaffold41.3773,
Biological process	postsynaptic specialization organization	GO:0099084	0.0188324	10	531	0.00212013	0.0251676	10	2.95805	evm.model.scaffold117.8847,evm.model.scaffold39.3591,evm.model.scaffold705.20217,evm.model.scaffold42.3889,evm.model.scaffold1222.22985,evm.model.scaffold901.21605,evm.model.scaffold227.12492,evm.model.scaffold260.13495,evm.model.scaffold88.7384,evm.model.scaffold45.3968,
Biological process	mesenchymal to epithelial transition	GO:0060231	0.0094162	5	531	0.00213887	0.025356	5	5.3941	evm.model.scaffold59.5863,evm.model.scaffold685.20043,evm.model.scaffold435.17065,evm.model.scaffold354.15371,evm.model.scaffold104.8408,
Biological process	tube formation	GO:0035148	0.0433145	23	531	0.0021502	0.0254561	23	1.93052	evm.model.scaffold120.9126,evm.model.scaffold320.14682,evm.model.scaffold35.3322,evm.model.scaffold123.9227,evm.model.scaffold59.5863,evm.model.scaffold685.20043,evm.model.scaffold783.20810,evm.model.scaffold414.16778,evm.model.scaffold393.16282,evm.model.scaffold435.17065,evm.model.scaffold602.19247,evm.model.scaffold638.19692,evm.model.scaffold88.7384,evm.model.scaffold354.15371,evm.model.scaff…
Biological process	cell-cell adhesion mediated by cadherin	GO:0044331	0.0169492	9	531	0.0021567	0.0254988	9	3.17422	evm.model.scaffold233.12647,evm.model.scaffold668.19893,evm.model.scaffold408.16694,evm.model.scaffold39.3591,evm.model.scaffold571.18873,evm.model.scaffold42.3889,evm.model.scaffold308.14483,evm.model.scaffold133.9666,evm.model.scaffold45.3968,
Biological process	embryonic skeletal system development	GO:0048706	0.039548	21	531	0.00222736	0.0260894	21	1.99554	evm.model.scaffold11.1075,evm.model.scaffold142.10011,evm.model.scaffold30.2989,evm.model.scaffold429.16970,evm.model.scaffold62.6004,evm.model.scaffold699.20193,evm.model.scaffold45.4005,evm.model.scaffold12.1294,evm.model.scaffold247.13101,evm.model.scaffold571.18873,evm.model.scaffold602.19247,evm.model.scaffold586.19075,evm.model.scaffold156.10549,evm.model.scaffold638.19688,evm.model.scaffol…
Biological process	transepithelial transport	GO:0070633	0.0207156	11	531	0.00223092	0.0260965	11	2.76355	evm.model.scaffold117.8835,evm.model.scaffold564.18771,evm.model.scaffold524.18311,evm.model.scaffold108.8545,evm.model.scaffold290.14172,evm.model.scaffold41.3757,evm.model.scaffold980.22013,evm.model.scaffold351.15266,evm.model.scaffold5231.24653,evm.model.scaffold1072.22395,evm.model.scaffold519.18258,
Biological process	cell migration involved in sprouting angiogenesis	GO:0002042	0.0188324	10	531	0.00224977	0.0262821	10	2.93439	evm.model.scaffold123.9227,evm.model.scaffold685.20043,evm.model.scaffold21.2089,evm.model.scaffold45.4005,evm.model.scaffold412.16756,evm.model.scaffold12.1145,evm.model.scaffold39.3604,evm.model.scaffold312.14524,evm.model.scaffold134.9699,evm.model.scaffold18.1790,
Biological process	lung alveolus development	GO:0048286	0.0188324	10	531	0.00224977	0.0262821	10	2.93439	evm.model.scaffold564.18774,evm.model.scaffold83.7126,evm.model.scaffold14.1522,evm.model.scaffold351.15211,evm.model.scaffold156.10553,evm.model.scaffold931.21776,evm.model.scaffold78.6870,evm.model.scaffold354.15371,evm.model.scaffold71.6509,evm.model.scaffold1418.23505,
Biological process	exocytosis	GO:0006887	0.146893	78	531	0.00225261	0.0262457	78	1.37483	evm.model.scaffold77.6782,evm.model.scaffold926.21746,evm.model.scaffold320.14682,evm.model.scaffold69.6333,evm.model.scaffold564.18774,evm.model.scaffold69.6332,evm.model.scaffold375.15950,evm.model.scaffold1229.23004,evm.model.scaffold375.15952,evm.model.scaffold121.9181,evm.model.scaffold195.11636,evm.model.scaffold422.16882,evm.model.scaffold117.8888,evm.model.scaffold1579.23795,evm.model.sca…
Biological process	positive regulation of branching involved in ureteric bud morphogenesis	GO:0090190	0.0112994	6	531	0.00229331	0.0265795	6	4.40158	evm.model.scaffold120.9126,evm.model.scaffold685.20043,evm.model.scaffold538.18475,evm.model.scaffold435.17065,evm.model.scaffold373.15916,evm.model.scaffold79.6968,
Biological process	negative regulation of cell fate commitment	GO:0010454	0.0112994	6	531	0.00229331	0.0265795	6	4.40158	evm.model.scaffold62.6004,evm.model.scaffold127.9368,evm.model.scaffold59.5863,evm.model.scaffold298.14273,evm.model.scaffold414.16778,evm.model.scaffold354.15371,
Biological process	smooth muscle cell proliferation	GO:0048659	0.039548	21	531	0.00229703	0.0265528	21	1.99038	evm.model.scaffold233.12647,evm.model.scaffold298.14290,evm.model.scaffold564.18774,evm.model.scaffold429.16970,evm.model.scaffold1579.23795,evm.model.scaffold39.3591,evm.model.scaffold546.18581,evm.model.scaffold406.16625,evm.model.scaffold26.2622,evm.model.scaffold108.8545,evm.model.scaffold261.13531,evm.model.scaffold811.21044,evm.model.scaffold28.2757,evm.model.scaffold308.14483,evm.model.sca…
Biological process	response to steroid hormone	GO:0048545	0.0922787	49	531	0.00231144	0.0266845	49	1.52057	evm.model.scaffold233.12647,evm.model.scaffold298.14290,evm.model.scaffold516.18218,evm.model.scaffold574.18975,evm.model.scaffold524.18311,evm.model.scaffold1204.22913,evm.model.scaffold1141.22698,evm.model.scaffold121.9181,evm.model.scaffold755.20553,evm.model.scaffold52.4698,evm.model.scaffold1579.23795,evm.model.scaffold120.9152,evm.model.scaffold285.14102,evm.model.scaffold10.1051,evm.model.…
Biological process	signal release from synapse	GO:0099643	0.0546139	29	531	0.00231764	0.026721	29	1.76697	evm.model.scaffold69.6333,evm.model.scaffold69.6332,evm.model.scaffold414.16785,evm.model.scaffold285.14102,evm.model.scaffold82.7109,evm.model.scaffold698.20173,evm.model.scaffold101.8201,evm.model.scaffold705.20217,evm.model.scaffold50.4590,evm.model.scaffold677.19974,evm.model.scaffold783.20810,evm.model.scaffold313.14534,evm.model.scaffold265.13610,evm.model.scaffold290.14174,evm.model.scaffo…
Biological process	neurotransmitter secretion	GO:0007269	0.0546139	29	531	0.00231764	0.026721	29	1.76697	evm.model.scaffold69.6333,evm.model.scaffold69.6332,evm.model.scaffold414.16785,evm.model.scaffold285.14102,evm.model.scaffold82.7109,evm.model.scaffold698.20173,evm.model.scaffold101.8201,evm.model.scaffold705.20217,evm.model.scaffold50.4590,evm.model.scaffold677.19974,evm.model.scaffold783.20810,evm.model.scaffold313.14534,evm.model.scaffold265.13610,evm.model.scaffold290.14174,evm.model.scaffo…
Biological process	outflow tract morphogenesis	GO:0003151	0.0207156	11	531	0.00235374	0.0270664	11	2.74475	evm.model.scaffold59.5863,evm.model.scaffold45.4005,evm.model.scaffold414.16778,evm.model.scaffold586.19075,evm.model.scaffold764.20654,evm.model.scaffold134.9699,evm.model.scaffold354.15371,evm.model.scaffold891.21560,evm.model.scaffold840.21251,evm.model.scaffold20.1997,evm.model.scaffold840.21268,
Biological process	negative regulation of I-kappaB kinase/NF-kappaB signaling	GO:0043124	0.0188324	10	531	0.00238571	0.0273984	10	2.9111	evm.model.scaffold120.9059,evm.model.scaffold538.18475,evm.model.scaffold403.16550,evm.model.scaffold883.21515,evm.model.scaffold780.20757,evm.model.scaffold466.17565,evm.model.scaffold116.8795,evm.model.scaffold12.1329,evm.model.scaffold274.13767,evm.model.scaffold541.18503,
Biological process	regulation of axon regeneration	GO:0048679	0.0188324	10	531	0.00238571	0.0273984	10	2.9111	evm.model.scaffold3.276,evm.model.scaffold290.14172,evm.model.scaffold1222.22985,evm.model.scaffold638.19692,evm.model.scaffold840.21238,evm.model.scaffold227.12492,evm.model.scaffold260.13495,evm.model.scaffold43.3904,evm.model.scaffold840.21268,evm.model.scaffold747.20514,
Biological process	morphogenesis of an epithelial sheet	GO:0002011	0.0263653	14	531	0.00239932	0.0274832	14	2.38846	evm.model.scaffold142.10011,evm.model.scaffold30.2989,evm.model.scaffold63.6075,evm.model.scaffold408.16694,evm.model.scaffold101.8201,evm.model.scaffold50.4590,evm.model.scaffold45.4005,evm.model.scaffold321.14713,evm.model.scaffold78.6910,evm.model.scaffold75.6695,evm.model.scaffold840.21251,evm.model.scaffold78.6902,evm.model.scaffold5.461,evm.model.scaffold840.21268,
Biological process	regulation of blood circulation	GO:1903522	0.0715631	38	531	0.00240614	0.0275255	38	1.62262	evm.model.scaffold233.12647,evm.model.scaffold69.6333,evm.model.scaffold69.6332,evm.model.scaffold524.18311,evm.model.scaffold121.9181,evm.model.scaffold755.20553,evm.model.scaffold422.16882,evm.model.scaffold1579.23795,evm.model.scaffold491.17924,evm.model.scaffold182.11288,evm.model.scaffold166.10795,evm.model.scaffold243.13040,evm.model.scaffold538.18475,evm.model.scaffold26.2622,evm.model.sca…
Biological process	respiratory system development	GO:0060541	0.0621469	33	531	0.00247879	0.0283198	33	1.68819	evm.model.scaffold233.12647,evm.model.scaffold926.21746,evm.model.scaffold564.18774,evm.model.scaffold1229.23004,evm.model.scaffold63.6075,evm.model.scaffold62.6004,evm.model.scaffold83.7126,evm.model.scaffold118.8991,evm.model.scaffold127.9368,evm.model.scaffold21.2089,evm.model.scaffold27.2685,evm.model.scaffold101.8201,evm.model.scaffold26.2622,evm.model.scaffold14.1522,evm.model.scaffold783.2…
Biological process	positive regulation of smooth muscle cell migration	GO:0014911	0.0207156	11	531	0.00248197	0.0283195	11	2.72621	evm.model.scaffold546.18581,evm.model.scaffold26.2622,evm.model.scaffold811.21044,evm.model.scaffold234.12856,evm.model.scaffold695.20137,evm.model.scaffold28.2757,evm.model.scaffold1.32,evm.model.scaffold28.2738,evm.model.scaffold71.6509,evm.model.scaffold47.4138,evm.model.scaffold54.5545,
Biological process	multi-organism reproductive process	GO:0044703	0.0677966	36	531	0.00249377	0.0284173	36	1.64443	evm.model.scaffold233.12647,evm.model.scaffold298.14290,evm.model.scaffold524.18311,evm.model.scaffold121.9181,evm.model.scaffold117.8888,evm.model.scaffold978.22000,evm.model.scaffold491.17924,evm.model.scaffold578.19012,evm.model.scaffold50.4591,evm.model.scaffold406.16626,evm.model.scaffold50.4573,evm.model.scaffold108.8545,evm.model.scaffold75.6618,evm.model.scaffold6.818,evm.model.scaffold80…
Biological process	regulation of neuron apoptotic process	GO:0043523	0.0583804	31	531	0.00250245	0.0284795	31	1.72023	evm.model.scaffold120.9126,evm.model.scaffold117.8847,evm.model.scaffold257.13419,evm.model.scaffold444.17178,evm.model.scaffold367.15739,evm.model.scaffold89.7664,evm.model.scaffold865.21421,evm.model.scaffold578.19012,evm.model.scaffold166.10795,evm.model.scaffold546.18581,evm.model.scaffold12.1145,evm.model.scaffold351.15333,evm.model.scaffold20.2014,evm.model.scaffold435.17065,evm.model.scaff…
Biological process	negative regulation of cell migration	GO:0030336	0.0583804	31	531	0.00250245	0.0284795	31	1.72023	evm.model.scaffold30.2966,evm.model.scaffold233.12647,evm.model.scaffold429.16970,evm.model.scaffold524.18311,evm.model.scaffold123.9227,evm.model.scaffold685.20043,evm.model.scaffold414.16778,evm.model.scaffold3.276,evm.model.scaffold666.19878,evm.model.scaffold943.21833,evm.model.scaffold6.818,evm.model.scaffold321.14713,evm.model.scaffold290.14172,evm.model.scaffold234.12856,evm.model.scaffold…
Biological process	odontogenesis of dentin-containing tooth	GO:0042475	0.0282486	15	531	0.00253663	0.0287942	15	2.29249	evm.model.scaffold564.18774,evm.model.scaffold810.21038,evm.model.scaffold63.6075,evm.model.scaffold57.5666,evm.model.scaffold101.8201,evm.model.scaffold3.276,evm.model.scaffold391.16267,evm.model.scaffold457.17402,evm.model.scaffold934.21786,evm.model.scaffold168.10834,evm.model.scaffold593.19157,evm.model.scaffold28.2738,evm.model.scaffold104.8408,evm.model.scaffold840.21268,evm.model.scaffold2…
Biological process	retina vasculature morphogenesis in camera-type eye	GO:0061299	0.0112994	6	531	0.00254033	0.0287992	6	4.31528	evm.model.scaffold63.6075,evm.model.scaffold57.5666,evm.model.scaffold666.19878,evm.model.scaffold695.20137,evm.model.scaffold24.2336,evm.model.scaffold275.13884,
Biological process	negative regulation of collateral sprouting	GO:0048671	0.0112994	6	531	0.00254033	0.0287992	6	4.31528	evm.model.scaffold290.14172,evm.model.scaffold250.13244,evm.model.scaffold31.3079,evm.model.scaffold227.12492,evm.model.scaffold747.20514,evm.model.scaffold513.18193,
Biological process	thyroid hormone metabolic process	GO:0042403	0.0150659	8	531	0.00256637	0.0290197	8	3.37286	evm.model.scaffold516.18218,evm.model.scaffold69.6292,evm.model.scaffold73.6573,evm.model.scaffold384.16141,evm.model.scaffold384.16139,evm.model.scaffold384.16138,evm.model.scaffold75.6618,evm.model.scaffold989.22040,
Biological process	relaxation of muscle	GO:0090075	0.0225989	12	531	0.00260388	0.0294062	12	2.57402	evm.model.scaffold926.21746,evm.model.scaffold182.11288,evm.model.scaffold26.2622,evm.model.scaffold1115.22607,evm.model.scaffold457.17406,evm.model.scaffold141.9977,evm.model.scaffold468.17590,evm.model.scaffold333.14976,evm.model.scaffold333.14978,evm.model.scaffold1072.22395,evm.model.scaffold543.18529,evm.model.scaffold54.5545,
Biological process	positive regulation of nervous system process	GO:0031646	0.0207156	11	531	0.0026158	0.029503	11	2.70791	evm.model.scaffold375.15950,evm.model.scaffold406.16626,evm.model.scaffold3.276,evm.model.scaffold311.14510,evm.model.scaffold391.16267,evm.model.scaffold351.15333,evm.model.scaffold290.14174,evm.model.scaffold28.2757,evm.model.scaffold25.2486,evm.model.scaffold25.2562,evm.model.scaffold234.12776,
Biological process	lens fiber cell differentiation	GO:0070306	0.0169492	9	531	0.00262039	0.029517	9	3.08522	evm.model.scaffold233.12647,evm.model.scaffold177.11091,evm.model.scaffold121.9179,evm.model.scaffold101.8201,evm.model.scaffold50.4590,evm.model.scaffold1222.22985,evm.model.scaffold260.13495,evm.model.scaffold308.14483,evm.model.scaffold104.8408,
Biological process	action potential	GO:0001508	0.0414313	22	531	0.00265819	0.0299046	22	1.93052	evm.model.scaffold524.18311,evm.model.scaffold89.7664,evm.model.scaffold491.17924,evm.model.scaffold243.13040,evm.model.scaffold313.14534,evm.model.scaffold372.15910,evm.model.scaffold265.13610,evm.model.scaffold689.20074,evm.model.scaffold1222.22985,evm.model.scaffold234.12750,evm.model.scaffold980.22013,evm.model.scaffold260.13495,evm.model.scaffold25.2486,evm.model.scaffold891.21560,evm.model.…
Biological process	pattern recognition receptor signaling pathway	GO:0002221	0.0414313	22	531	0.00265819	0.0299046	22	1.93052	evm.model.scaffold306.14449,evm.model.scaffold465.17498,evm.model.scaffold444.17178,evm.model.scaffold113.8721,evm.model.scaffold422.16882,evm.model.scaffold408.16694,evm.model.scaffold48.4353,evm.model.scaffold538.18475,evm.model.scaffold362.15580,evm.model.scaffold1432.23535,evm.model.scaffold75.6618,evm.model.scaffold403.16550,evm.model.scaffold8.878,evm.model.scaffold373.15916,evm.model.scaff…
Biological process	glial cell development	GO:0021782	0.0338983	18	531	0.00266264	0.0298785	18	2.09599	evm.model.scaffold233.12647,evm.model.scaffold320.14682,evm.model.scaffold422.16882,evm.model.scaffold406.16626,evm.model.scaffold311.14510,evm.model.scaffold351.15333,evm.model.scaffold265.13610,evm.model.scaffold41.3757,evm.model.scaffold1222.22985,evm.model.scaffold224.12439,evm.model.scaffold12.1329,evm.model.scaffold234.12750,evm.model.scaffold260.13495,evm.model.scaffold308.14483,evm.model.…
Biological process	regulation of insulin secretion	GO:0050796	0.0508475	27	531	0.00269044	0.0301521	27	1.79088	evm.model.scaffold233.12647,evm.model.scaffold77.6782,evm.model.scaffold1204.22913,evm.model.scaffold121.9181,evm.model.scaffold82.7109,evm.model.scaffold182.11288,evm.model.scaffold57.5666,evm.model.scaffold50.4573,evm.model.scaffold62.5967,evm.model.scaffold54.5530,evm.model.scaffold6.676,evm.model.scaffold116.8798,evm.model.scaffold116.8795,evm.model.scaffold88.7432,evm.model.scaffold12.1329,e…
Biological process	regulation of smooth muscle cell migration	GO:0014910	0.0263653	14	531	0.00272277	0.0303601	14	2.35559	evm.model.scaffold546.18581,evm.model.scaffold26.2622,evm.model.scaffold247.13101,evm.model.scaffold811.21044,evm.model.scaffold586.19075,evm.model.scaffold234.12856,evm.model.scaffold134.9699,evm.model.scaffold695.20137,evm.model.scaffold28.2757,evm.model.scaffold1.32,evm.model.scaffold28.2738,evm.model.scaffold71.6509,evm.model.scaffold47.4138,evm.model.scaffold54.5545,
Biological process	multicellular organismal movement	GO:0050879	0.0225989	12	531	0.00273195	0.0304239	12	2.55906	evm.model.scaffold11.1090,evm.model.scaffold21.2089,evm.model.scaffold243.13040,evm.model.scaffold465.17515,evm.model.scaffold8.878,evm.model.scaffold457.17406,evm.model.scaffold37.3468,evm.model.scaffold24.2315,evm.model.scaffold333.14976,evm.model.scaffold333.14978,evm.model.scaffold41.3679,evm.model.scaffold543.18529,
Biological process	musculoskeletal movement	GO:0050881	0.0225989	12	531	0.00273195	0.0304239	12	2.55906	evm.model.scaffold11.1090,evm.model.scaffold21.2089,evm.model.scaffold243.13040,evm.model.scaffold465.17515,evm.model.scaffold8.878,evm.model.scaffold457.17406,evm.model.scaffold37.3468,evm.model.scaffold24.2315,evm.model.scaffold333.14976,evm.model.scaffold333.14978,evm.model.scaffold41.3679,evm.model.scaffold543.18529,
Biological process	obsolete activation of MAPK activity	GO:0000187	0.0376648	20	531	0.00275178	0.0305676	20	1.9989	evm.model.scaffold17.1782,evm.model.scaffold429.16970,evm.model.scaffold121.9181,evm.model.scaffold193.11588,evm.model.scaffold170.10903,evm.model.scaffold685.20043,evm.model.scaffold166.10795,evm.model.scaffold148.10260,evm.model.scaffold20.2014,evm.model.scaffold248.13205,evm.model.scaffold1222.22985,evm.model.scaffold101.8256,evm.model.scaffold466.17562,evm.model.scaffold260.13495,evm.model.sc…
Biological process	trabecula formation	GO:0060343	0.0150659	8	531	0.00275727	0.0305901	8	3.33453	evm.model.scaffold320.14682,evm.model.scaffold35.3322,evm.model.scaffold193.11588,evm.model.scaffold685.20043,evm.model.scaffold610.19371,evm.model.scaffold414.16778,evm.model.scaffold484.17805,evm.model.scaffold840.21268,
Biological process	basement membrane assembly	GO:0070831	0.0094162	5	531	0.00277132	0.0307073	5	5.09442	evm.model.scaffold57.5666,evm.model.scaffold321.14713,evm.model.scaffold41.3757,evm.model.scaffold617.19445,evm.model.scaffold30.2908,
Biological process	mucosa-associated lymphoid tissue development	GO:0048537	0.0094162	5	531	0.00277132	0.0307073	5	5.09442	evm.model.scaffold120.9126,evm.model.scaffold466.17565,evm.model.scaffold27.2662,evm.model.scaffold274.13767,evm.model.scaffold87.7331,
Biological process	Peyer's patch development	GO:0048541	0.0094162	5	531	0.00277132	0.0307073	5	5.09442	evm.model.scaffold120.9126,evm.model.scaffold466.17565,evm.model.scaffold27.2662,evm.model.scaffold274.13767,evm.model.scaffold87.7331,
Biological process	regulation of cell projection size	GO:0032536	0.0094162	5	531	0.00277132	0.0307073	5	5.09442	evm.model.scaffold101.8201,evm.model.scaffold50.4590,evm.model.scaffold224.12439,evm.model.scaffold43.3910,evm.model.scaffold104.8408,
Biological process	B cell activation	GO:0042113	0.0602637	32	531	0.00278568	0.0307122	32	1.69129	evm.model.scaffold77.6782,evm.model.scaffold320.14682,evm.model.scaffold257.13419,evm.model.scaffold450.17285,evm.model.scaffold367.15739,evm.model.scaffold113.8721,evm.model.scaffold865.21421,evm.model.scaffold170.10903,evm.model.scaffold48.4348,evm.model.scaffold39.3591,evm.model.scaffold69.6299,evm.model.scaffold1432.23535,evm.model.scaffold20.2039,evm.model.scaffold93.7815,evm.model.scaffold3…
Biological process	cranial nerve morphogenesis	GO:0021602	0.0169492	9	531	0.00279136	0.0307364	9	3.05665	evm.model.scaffold11.1075,evm.model.scaffold127.9368,evm.model.scaffold247.13101,evm.model.scaffold86.7243,evm.model.scaffold25.2486,evm.model.scaffold85.7227,evm.model.scaffold234.12776,evm.model.scaffold85.7218,evm.model.scaffold241.12997,
Biological process	skeletal muscle tissue development	GO:0007519	0.047081	25	531	0.00279736	0.030764	25	1.83399	evm.model.scaffold201.11760,evm.model.scaffold257.13419,evm.model.scaffold83.7126,evm.model.scaffold367.15739,evm.model.scaffold408.16694,evm.model.scaffold459.17451,evm.model.scaffold37.3511,evm.model.scaffold243.13040,evm.model.scaffold465.17515,evm.model.scaffold393.16282,evm.model.scaffold75.6618,evm.model.scaffold602.19247,evm.model.scaffold340.15060,evm.model.scaffold12.1229,evm.model.scaff…
Biological process	sex differentiation	GO:0007548	0.0734463	39	531	0.00280567	0.030817	39	1.59656	evm.model.scaffold1727.23994,evm.model.scaffold233.12647,evm.model.scaffold564.18771,evm.model.scaffold450.17285,evm.model.scaffold444.17178,evm.model.scaffold1055.22339,evm.model.scaffold865.21421,evm.model.scaffold798.20908,evm.model.scaffold1432.23535,evm.model.scaffold465.17518,evm.model.scaffold414.16778,evm.model.scaffold571.18873,evm.model.scaffold435.17065,evm.model.scaffold8.878,evm.mode…
Biological process	lens fiber cell development	GO:0070307	0.0112994	6	531	0.00280681	0.0307911	6	4.23229	evm.model.scaffold233.12647,evm.model.scaffold177.11091,evm.model.scaffold101.8201,evm.model.scaffold50.4590,evm.model.scaffold308.14483,evm.model.scaffold104.8408,
Biological process	regulation of synapse maturation	GO:0090128	0.0112994	6	531	0.00280681	0.0307911	6	4.23229	evm.model.scaffold257.13419,evm.model.scaffold367.15739,evm.model.scaffold37.3511,evm.model.scaffold783.20810,evm.model.scaffold24.2336,evm.model.scaffold54.5545,
Biological process	skeletal muscle contraction	GO:0003009	0.0188324	10	531	0.00283353	0.0308159	10	2.8434	evm.model.scaffold11.1090,evm.model.scaffold243.13040,evm.model.scaffold465.17515,evm.model.scaffold8.878,evm.model.scaffold457.17406,evm.model.scaffold24.2315,evm.model.scaffold333.14976,evm.model.scaffold333.14978,evm.model.scaffold41.3679,evm.model.scaffold543.18529,
Biological process	negative regulation of Wnt signaling pathway	GO:0030178	0.039548	21	531	0.00283819	0.0308286	21	1.95502	evm.model.scaffold257.13419,evm.model.scaffold668.19893,evm.model.scaffold367.15739,evm.model.scaffold59.5863,evm.model.scaffold39.3591,evm.model.scaffold685.20043,evm.model.scaffold42.3806,evm.model.scaffold120.9059,evm.model.scaffold57.5666,evm.model.scaffold414.16778,evm.model.scaffold3.276,evm.model.scaffold352.15355,evm.model.scaffold564.18750,evm.model.scaffold42.3889,evm.model.scaffold49.4…
Biological process	transport across blood-brain barrier	GO:0150104	0.0263653	14	531	0.00283824	0.0307912	14	2.34483	evm.model.scaffold117.8835,evm.model.scaffold516.18218,evm.model.scaffold457.17397,evm.model.scaffold978.22000,evm.model.scaffold71.6458,evm.model.scaffold384.16135,evm.model.scaffold934.21786,evm.model.scaffold141.9977,evm.model.scaffold5231.24653,evm.model.scaffold989.22040,evm.model.scaffold1072.22395,evm.model.scaffold1072.22396,evm.model.scaffold139.9923,evm.model.scaffold467.17586,
Biological process	cellular response to monoamine stimulus	GO:0071868	0.0263653	14	531	0.00283824	0.0307912	14	2.34483	evm.model.scaffold778.20743,evm.model.scaffold118.8991,evm.model.scaffold182.11288,evm.model.scaffold26.2622,evm.model.scaffold265.13610,evm.model.scaffold6.819,evm.model.scaffold265.13608,evm.model.scaffold340.15060,evm.model.scaffold54.5530,evm.model.scaffold6.676,evm.model.scaffold351.15266,evm.model.scaffold891.21560,evm.model.scaffold1.32,evm.model.scaffold514.18196,
Biological process	cellular response to catecholamine stimulus	GO:0071870	0.0263653	14	531	0.00283824	0.0307912	14	2.34483	evm.model.scaffold778.20743,evm.model.scaffold118.8991,evm.model.scaffold182.11288,evm.model.scaffold26.2622,evm.model.scaffold265.13610,evm.model.scaffold6.819,evm.model.scaffold265.13608,evm.model.scaffold340.15060,evm.model.scaffold54.5530,evm.model.scaffold6.676,evm.model.scaffold351.15266,evm.model.scaffold891.21560,evm.model.scaffold1.32,evm.model.scaffold514.18196,
Biological process	vascular transport	GO:0010232	0.0263653	14	531	0.00283824	0.0307912	14	2.34483	evm.model.scaffold117.8835,evm.model.scaffold516.18218,evm.model.scaffold457.17397,evm.model.scaffold978.22000,evm.model.scaffold71.6458,evm.model.scaffold384.16135,evm.model.scaffold934.21786,evm.model.scaffold141.9977,evm.model.scaffold5231.24653,evm.model.scaffold989.22040,evm.model.scaffold1072.22395,evm.model.scaffold1072.22396,evm.model.scaffold139.9923,evm.model.scaffold467.17586,
Biological process	regulation of neuronal synaptic plasticity	GO:0048168	0.0282486	15	531	0.00285461	0.0308172	15	2.26419	evm.model.scaffold298.14290,evm.model.scaffold117.8847,evm.model.scaffold89.7664,evm.model.scaffold37.3511,evm.model.scaffold538.18475,evm.model.scaffold705.20217,evm.model.scaffold802.20920,evm.model.scaffold465.17515,evm.model.scaffold290.14174,evm.model.scaffold689.20074,evm.model.scaffold708.20241,evm.model.scaffold224.12439,evm.model.scaffold88.7384,evm.model.scaffold90.7693,evm.model.scaffo…
Biological process	negative regulation of immune effector process	GO:0002698	0.0320151	17	531	0.00285474	0.030781	17	2.13547	evm.model.scaffold233.12648,evm.model.scaffold62.6004,evm.model.scaffold23.2267,evm.model.scaffold792.20877,evm.model.scaffold166.10795,evm.model.scaffold12.1294,evm.model.scaffold465.17518,evm.model.scaffold351.15333,evm.model.scaffold148.10359,evm.model.scaffold196.11682,evm.model.scaffold617.19445,evm.model.scaffold85.7182,evm.model.scaffold252.13298,evm.model.scaffold1827.24084,evm.model.scaf…
Biological process	cellular response to transforming growth factor beta stimulus	GO:0071560	0.0489642	26	531	0.00285565	0.0307532	26	1.8062	evm.model.scaffold201.11761,evm.model.scaffold233.12648,evm.model.scaffold35.3322,evm.model.scaffold117.8888,evm.model.scaffold166.10795,evm.model.scaffold413.16776,evm.model.scaffold101.8201,evm.model.scaffold50.4590,evm.model.scaffold14.1522,evm.model.scaffold75.6618,evm.model.scaffold351.15211,evm.model.scaffold435.17065,evm.model.scaffold811.21044,evm.model.scaffold298.14312,evm.model.scaffol…
Biological process	positive regulation of protein kinase activity	GO:0045860	0.0734463	39	531	0.00285979	0.0307601	39	1.59478	evm.model.scaffold227.12504,evm.model.scaffold127.9368,evm.model.scaffold865.21421,evm.model.scaffold578.19012,evm.model.scaffold685.20043,evm.model.scaffold166.10795,evm.model.scaffold120.9081,evm.model.scaffold37.3511,evm.model.scaffold1432.23535,evm.model.scaffold12.1294,evm.model.scaffold412.16756,evm.model.scaffold12.1145,evm.model.scaffold313.14534,evm.model.scaffold39.3604,evm.model.scaffo…
Biological process	hindbrain morphogenesis	GO:0021575	0.0225989	12	531	0.00286508	0.0307795	12	2.54427	evm.model.scaffold69.6333,evm.model.scaffold69.6332,evm.model.scaffold755.20553,evm.model.scaffold123.9227,evm.model.scaffold422.16882,evm.model.scaffold699.20193,evm.model.scaffold101.8201,evm.model.scaffold50.4590,evm.model.scaffold901.21605,evm.model.scaffold466.17565,evm.model.scaffold435.17081,evm.model.scaffold274.13767,
Biological process	ERK1 and ERK2 cascade	GO:0070371	0.0659134	35	531	0.00286562	0.0307479	35	1.64378	evm.model.scaffold233.12647,evm.model.scaffold375.15950,evm.model.scaffold778.20743,evm.model.scaffold195.11633,evm.model.scaffold360.15477,evm.model.scaffold118.8991,evm.model.scaffold422.16882,evm.model.scaffold865.21421,evm.model.scaffold120.9152,evm.model.scaffold170.10903,evm.model.scaffold10.1051,evm.model.scaffold182.11288,evm.model.scaffold120.9081,evm.model.scaffold538.18475,evm.model.sc…
Biological process	regulation of calcium-mediated signaling	GO:0050848	0.0244821	13	531	0.0028847	0.030915	13	2.43285	evm.model.scaffold39.3591,evm.model.scaffold394.16320,evm.model.scaffold610.19371,evm.model.scaffold48.4287,evm.model.scaffold20.2052,evm.model.scaffold351.15333,evm.model.scaffold1358.23380,evm.model.scaffold67.6205,evm.model.scaffold141.9977,evm.model.scaffold22.2174,evm.model.scaffold1072.22395,evm.model.scaffold45.3968,evm.model.scaffold234.12776,
Biological process	cellular response to molecule of bacterial origin	GO:0071219	0.0508475	27	531	0.00289739	0.0310133	27	1.78122	evm.model.scaffold30.2966,evm.model.scaffold233.12647,evm.model.scaffold465.17498,evm.model.scaffold564.18771,evm.model.scaffold778.20743,evm.model.scaffold1018.22191,evm.model.scaffold444.17178,evm.model.scaffold118.8991,evm.model.scaffold693.20101,evm.model.scaffold182.11288,evm.model.scaffold26.2622,evm.model.scaffold108.8545,evm.model.scaffold391.16267,evm.model.scaffold8.878,evm.model.scaffo…
Biological process	natural killer cell differentiation	GO:0001779	0.0131827	7	531	0.00292809	0.031304	7	3.66798	evm.model.scaffold444.17178,evm.model.scaffold8.878,evm.model.scaffold148.10359,evm.model.scaffold667.19884,evm.model.scaffold351.15266,evm.model.scaffold27.2662,evm.model.scaffold87.7331,
Biological process	muscle filament sliding	GO:0030049	0.0169492	9	531	0.00297104	0.0317247	9	3.02861	evm.model.scaffold926.21746,evm.model.scaffold177.11091,evm.model.scaffold243.13040,evm.model.scaffold465.17515,evm.model.scaffold1115.22607,evm.model.scaffold24.2315,evm.model.scaffold468.17590,evm.model.scaffold41.3679,evm.model.scaffold543.18529,
Biological process	positive regulation of JNK cascade	GO:0046330	0.0244821	13	531	0.00301401	0.0321445	13	2.4205	evm.model.scaffold233.12647,evm.model.scaffold865.21421,evm.model.scaffold59.5863,evm.model.scaffold101.8201,evm.model.scaffold1432.23535,evm.model.scaffold50.4590,evm.model.scaffold156.10553,evm.model.scaffold351.15266,evm.model.scaffold354.15371,evm.model.scaffold308.14483,evm.model.scaffold104.8408,evm.model.scaffold85.7227,evm.model.scaffold85.7218,
Biological process	dendritic spine organization	GO:0097061	0.0301318	16	531	0.00303852	0.0323668	16	2.1817	evm.model.scaffold298.14290,evm.model.scaffold668.19893,evm.model.scaffold42.3806,evm.model.scaffold101.8201,evm.model.scaffold50.4590,evm.model.scaffold12.1294,evm.model.scaffold18.1817,evm.model.scaffold466.17562,evm.model.scaffold708.20241,evm.model.scaffold88.7432,evm.model.scaffold31.3079,evm.model.scaffold24.2336,evm.model.scaffold88.7384,evm.model.scaffold140.9954,evm.model.scaffold701.202…
Biological process	exocrine system development	GO:0035272	0.0263653	14	531	0.00308124	0.0327823	14	2.32361	evm.model.scaffold63.6075,evm.model.scaffold668.19893,evm.model.scaffold127.9368,evm.model.scaffold166.10795,evm.model.scaffold247.13101,evm.model.scaffold1608.23837,evm.model.scaffold602.19247,evm.model.scaffold586.19075,evm.model.scaffold181.11247,evm.model.scaffold134.9699,evm.model.scaffold71.6509,evm.model.scaffold25.2562,evm.model.scaffold85.7227,evm.model.scaffold85.7218,
Biological process	regulation of pattern recognition receptor signaling pathway	GO:0062207	0.0263653	14	531	0.00308124	0.0327823	14	2.32361	evm.model.scaffold465.17498,evm.model.scaffold444.17178,evm.model.scaffold113.8721,evm.model.scaffold408.16694,evm.model.scaffold538.18475,evm.model.scaffold1432.23535,evm.model.scaffold403.16550,evm.model.scaffold8.878,evm.model.scaffold373.15916,evm.model.scaffold667.19884,evm.model.scaffold12.1329,evm.model.scaffold227.12492,evm.model.scaffold79.6968,evm.model.scaffold541.18503,
Biological process	cell-cell signaling by wnt	GO:0198738	0.0847458	45	531	0.00309091	0.032806	45	1.52974	evm.model.scaffold306.14449,evm.model.scaffold69.6332,evm.model.scaffold778.20743,evm.model.scaffold257.13419,evm.model.scaffold668.19893,evm.model.scaffold367.15739,evm.model.scaffold127.9382,evm.model.scaffold491.17924,evm.model.scaffold408.16694,evm.model.scaffold59.5863,evm.model.scaffold39.3591,evm.model.scaffold685.20043,evm.model.scaffold42.3806,evm.model.scaffold120.9059,evm.model.scaffol…
Biological process	regulation of excitatory synapse assembly	GO:1904889	0.0112994	6	531	0.00309367	0.0327958	6	4.15244	evm.model.scaffold101.8201,evm.model.scaffold50.4590,evm.model.scaffold1222.22985,evm.model.scaffold901.21605,evm.model.scaffold227.12492,evm.model.scaffold260.13495,
Biological process	skeletal myofibril assembly	GO:0014866	0.0112994	6	531	0.00309367	0.0327958	6	4.15244	evm.model.scaffold926.21746,evm.model.scaffold1122.22625,evm.model.scaffold1115.22607,evm.model.scaffold544.18544,evm.model.scaffold468.17590,evm.model.scaffold543.18529,
Biological process	response to peptide hormone	GO:0043434	0.105461	56	531	0.00311403	0.0329326	56	1.45267	evm.model.scaffold233.12647,evm.model.scaffold298.14290,evm.model.scaffold233.12648,evm.model.scaffold564.18771,evm.model.scaffold778.20743,evm.model.scaffold516.18218,evm.model.scaffold755.20553,evm.model.scaffold113.8721,evm.model.scaffold123.9227,evm.model.scaffold1015.22174,evm.model.scaffold422.16882,evm.model.scaffold865.21421,evm.model.scaffold59.5863,evm.model.scaffold508.18123,evm.model.…
Biological process	negative regulation of bone mineralization	GO:0030502	0.0094162	5	531	0.00313369	0.0331007	5	4.95674	evm.model.scaffold233.12648,evm.model.scaffold685.20043,evm.model.scaffold14.1522,evm.model.scaffold351.15211,evm.model.scaffold18.1886,
Biological process	skeletal muscle satellite cell differentiation	GO:0014816	0.0094162	5	531	0.00313369	0.0331007	5	4.95674	evm.model.scaffold465.17515,evm.model.scaffold602.19247,evm.model.scaffold804.20949,evm.model.scaffold5.461,evm.model.scaffold840.21268,
Biological process	axon extension involved in regeneration	GO:0048677	0.0094162	5	531	0.00313369	0.0331007	5	4.95674	evm.model.scaffold3.276,evm.model.scaffold41.3757,evm.model.scaffold1222.22985,evm.model.scaffold638.19692,evm.model.scaffold260.13495,
Biological process	dendritic spine development	GO:0060996	0.0338983	18	531	0.00314729	0.0331254	18	2.06324	evm.model.scaffold298.14290,evm.model.scaffold668.19893,evm.model.scaffold118.8991,evm.model.scaffold42.3806,evm.model.scaffold37.3511,evm.model.scaffold101.8201,evm.model.scaffold50.4590,evm.model.scaffold12.1294,evm.model.scaffold18.1817,evm.model.scaffold250.13244,evm.model.scaffold67.6219,evm.model.scaffold708.20241,evm.model.scaffold31.3079,evm.model.scaffold227.12492,evm.model.scaffold24.23…
Biological process	sensory perception of temperature stimulus	GO:0050951	0.0169492	9	531	0.00315972	0.0332167	9	3.00108	evm.model.scaffold17.1782,evm.model.scaffold778.20743,evm.model.scaffold426.16937,evm.model.scaffold89.7664,evm.model.scaffold12.1152,evm.model.scaffold571.18873,evm.model.scaffold133.9666,evm.model.scaffold90.7693,evm.model.scaffold216.12178,
Biological process	negative regulation of locomotion	GO:0040013	0.0640301	34	531	0.0031601	0.0331811	34	1.64744	evm.model.scaffold30.2966,evm.model.scaffold233.12647,evm.model.scaffold429.16970,evm.model.scaffold524.18311,evm.model.scaffold123.9227,evm.model.scaffold685.20043,evm.model.scaffold50.4591,evm.model.scaffold50.4573,evm.model.scaffold247.13101,evm.model.scaffold414.16778,evm.model.scaffold3.276,evm.model.scaffold666.19878,evm.model.scaffold943.21833,evm.model.scaffold6.818,evm.model.scaffold321.…
Biological process	nephron tubule development	GO:0072080	0.0320151	17	531	0.00316892	0.0332341	17	2.11375	evm.model.scaffold30.2966,evm.model.scaffold120.9126,evm.model.scaffold63.6075,evm.model.scaffold685.20043,evm.model.scaffold42.3806,evm.model.scaffold538.18475,evm.model.scaffold101.8201,evm.model.scaffold435.17065,evm.model.scaffold373.15916,evm.model.scaffold75.6695,evm.model.scaffold466.17527,evm.model.scaffold308.14483,evm.model.scaffold484.17805,evm.model.scaffold18.1790,evm.model.scaffold7…
Biological process	regulation of postsynaptic density organization	GO:1905874	0.0131827	7	531	0.00317376	0.0332453	7	3.61632	evm.model.scaffold39.3591,evm.model.scaffold42.3889,evm.model.scaffold1222.22985,evm.model.scaffold901.21605,evm.model.scaffold227.12492,evm.model.scaffold260.13495,evm.model.scaffold45.3968,
Biological process	sensory perception	GO:0007600	0.160075	85	531	0.00317968	0.0332679	85	1.33581	evm.model.scaffold233.12647,evm.model.scaffold117.8835,evm.model.scaffold17.1782,evm.model.scaffold69.6333,evm.model.scaffold69.6332,evm.model.scaffold564.18771,evm.model.scaffold778.20743,evm.model.scaffold142.10011,evm.model.scaffold30.2989,evm.model.scaffold676.19971,evm.model.scaffold1204.22913,evm.model.scaffold426.16937,evm.model.scaffold1706.23981,evm.model.scaffold121.9181,evm.model.scaff…
Biological process	secondary metabolite biosynthetic process	GO:0044550	0.0207156	11	531	0.00321059	0.0334721	11	2.63711	evm.model.scaffold280.14000,evm.model.scaffold360.15477,evm.model.scaffold704.20212,evm.model.scaffold45.4062,evm.model.scaffold165.10758,evm.model.scaffold934.21786,evm.model.scaffold42.3889,evm.model.scaffold292.14185,evm.model.scaffold708.20241,evm.model.scaffold531.18409,evm.model.scaffold1088.22456,
Biological process	cardiac muscle hypertrophy	GO:0003300	0.0338983	18	531	0.00325253	0.0338693	18	2.05681	evm.model.scaffold1727.23994,evm.model.scaffold926.21746,evm.model.scaffold257.13419,evm.model.scaffold367.15739,evm.model.scaffold243.13040,evm.model.scaffold313.14534,evm.model.scaffold391.16267,evm.model.scaffold20.2052,evm.model.scaffold1115.22607,evm.model.scaffold67.6205,evm.model.scaffold67.6219,evm.model.scaffold891.21560,evm.model.scaffold1.32,evm.model.scaffold28.2738,evm.model.scaffold…
Biological process	myotube differentiation	GO:0014902	0.0376648	20	531	0.0033057	0.0343824	20	1.96675	evm.model.scaffold233.12647,evm.model.scaffold257.13419,evm.model.scaffold367.15739,evm.model.scaffold693.20101,evm.model.scaffold408.16694,evm.model.scaffold243.13040,evm.model.scaffold1122.22625,evm.model.scaffold571.18873,evm.model.scaffold340.15060,evm.model.scaffold101.8256,evm.model.scaffold6.675,evm.model.scaffold234.12750,evm.model.scaffold75.6695,evm.model.scaffold308.14483,evm.model.sca…
Biological process	syncytium formation by plasma membrane fusion	GO:0000768	0.0263653	14	531	0.00334104	0.034709	14	2.30277	evm.model.scaffold257.13419,evm.model.scaffold367.15739,evm.model.scaffold117.8888,evm.model.scaffold693.20101,evm.model.scaffold408.16694,evm.model.scaffold243.13040,evm.model.scaffold1122.22625,evm.model.scaffold101.8256,evm.model.scaffold67.6219,evm.model.scaffold6.675,evm.model.scaffold6.779,evm.model.scaffold252.13298,evm.model.scaffold30.2908,evm.model.scaffold1059.22353,
Biological process	cell-cell fusion	GO:0140253	0.0263653	14	531	0.00334104	0.034709	14	2.30277	evm.model.scaffold257.13419,evm.model.scaffold367.15739,evm.model.scaffold117.8888,evm.model.scaffold693.20101,evm.model.scaffold408.16694,evm.model.scaffold243.13040,evm.model.scaffold1122.22625,evm.model.scaffold101.8256,evm.model.scaffold67.6219,evm.model.scaffold6.675,evm.model.scaffold6.779,evm.model.scaffold252.13298,evm.model.scaffold30.2908,evm.model.scaffold1059.22353,
Biological process	negative regulation of transforming growth factor beta receptor signaling pathway	GO:0030512	0.0188324	10	531	0.00334608	0.0346797	10	2.77878	evm.model.scaffold201.11761,evm.model.scaffold117.8888,evm.model.scaffold14.1522,evm.model.scaffold351.15211,evm.model.scaffold340.15060,evm.model.scaffold340.15061,evm.model.scaffold248.13205,evm.model.scaffold252.13298,evm.model.scaffold484.17805,evm.model.scaffold216.12168,
Biological process	cerebellum morphogenesis	GO:0021587	0.0207156	11	531	0.00337507	0.0349391	11	2.61999	evm.model.scaffold69.6333,evm.model.scaffold69.6332,evm.model.scaffold755.20553,evm.model.scaffold422.16882,evm.model.scaffold699.20193,evm.model.scaffold101.8201,evm.model.scaffold50.4590,evm.model.scaffold901.21605,evm.model.scaffold466.17565,evm.model.scaffold435.17081,evm.model.scaffold274.13767,
Biological process	collagen metabolic process	GO:0032963	0.0301318	16	531	0.0033868	0.0350194	16	2.15764	evm.model.scaffold233.12647,evm.model.scaffold564.18774,evm.model.scaffold142.10011,evm.model.scaffold30.2989,evm.model.scaffold14.1522,evm.model.scaffold783.20810,evm.model.scaffold3.276,evm.model.scaffold75.6618,evm.model.scaffold571.18873,evm.model.scaffold351.15211,evm.model.scaffold695.20137,evm.model.scaffold78.6870,evm.model.scaffold28.2757,evm.model.scaffold308.14483,evm.model.scaffold133…
Biological process	positive regulation of cell junction assembly	GO:1901890	0.0320151	17	531	0.00339389	0.0350517	17	2.09952	evm.model.scaffold516.18216,evm.model.scaffold193.11588,evm.model.scaffold408.16694,evm.model.scaffold101.8201,evm.model.scaffold50.4590,evm.model.scaffold138.9856,evm.model.scaffold18.1817,evm.model.scaffold290.14172,evm.model.scaffold1222.22985,evm.model.scaffold901.21605,evm.model.scaffold227.12492,evm.model.scaffold260.13495,evm.model.scaffold72.6527,evm.model.scaffold104.8408,evm.model.scaff…
Biological process	cellular response to peptide hormone stimulus	GO:0071375	0.079096	42	531	0.00340453	0.0351204	42	1.5483	evm.model.scaffold298.14290,evm.model.scaffold233.12648,evm.model.scaffold755.20553,evm.model.scaffold113.8721,evm.model.scaffold123.9227,evm.model.scaffold1015.22174,evm.model.scaffold422.16882,evm.model.scaffold59.5863,evm.model.scaffold508.18123,evm.model.scaffold71.6458,evm.model.scaffold120.9081,evm.model.scaffold243.13040,evm.model.scaffold538.18475,evm.model.scaffold45.4005,evm.model.scaff…
Biological process	inflammatory response to antigenic stimulus	GO:0002437	0.0244821	13	531	0.00343054	0.0353474	13	2.38419	evm.model.scaffold778.20743,evm.model.scaffold1018.22191,evm.model.scaffold195.11633,evm.model.scaffold693.20101,evm.model.scaffold120.9152,evm.model.scaffold69.6299,evm.model.scaffold538.18475,evm.model.scaffold351.15266,evm.model.scaffold75.6695,evm.model.scaffold234.12714,evm.model.scaffold28.2738,evm.model.scaffold275.13879,evm.model.scaffold541.18503,
Biological process	neuron projection arborization	GO:0140058	0.0131827	7	531	0.00343485	0.0353505	7	3.5661	evm.model.scaffold69.6332,evm.model.scaffold491.17924,evm.model.scaffold4.389,evm.model.scaffold275.13884,evm.model.scaffold30.2908,evm.model.scaffold85.7227,evm.model.scaffold85.7218,
Biological process	cranial nerve development	GO:0021545	0.0225989	12	531	0.00345127	0.0354781	12	2.48677	evm.model.scaffold117.8835,evm.model.scaffold320.14682,evm.model.scaffold11.1075,evm.model.scaffold422.16882,evm.model.scaffold127.9368,evm.model.scaffold247.13101,evm.model.scaffold86.7243,evm.model.scaffold25.2486,evm.model.scaffold85.7227,evm.model.scaffold234.12776,evm.model.scaffold85.7218,evm.model.scaffold241.12997,
Biological process	regulation of protein kinase activity	GO:0045859	0.107345	57	531	0.00345864	0.0355125	57	1.43991	evm.model.scaffold926.21746,evm.model.scaffold227.12504,evm.model.scaffold127.9368,evm.model.scaffold865.21421,evm.model.scaffold578.19012,evm.model.scaffold685.20043,evm.model.scaffold57.5666,evm.model.scaffold166.10795,evm.model.scaffold120.9081,evm.model.scaffold37.3511,evm.model.scaffold197.11698,evm.model.scaffold1432.23535,evm.model.scaffold12.1294,evm.model.scaffold412.16756,evm.model.scaf…
Biological process	response to molecule of bacterial origin	GO:0002237	0.0809793	43	531	0.00347719	0.0356614	43	1.53726	evm.model.scaffold30.2966,evm.model.scaffold233.12647,evm.model.scaffold298.14290,evm.model.scaffold465.17498,evm.model.scaffold564.18771,evm.model.scaffold778.20743,evm.model.scaffold516.18218,evm.model.scaffold1018.22191,evm.model.scaffold1204.22913,evm.model.scaffold444.17178,evm.model.scaffold118.8991,evm.model.scaffold1579.23795,evm.model.scaffold865.21421,evm.model.scaffold693.20101,evm.mod…
Biological process	neuron death	GO:0070997	0.0809793	43	531	0.00347719	0.0356614	43	1.53726	evm.model.scaffold120.9126,evm.model.scaffold516.18216,evm.model.scaffold117.8847,evm.model.scaffold257.13419,evm.model.scaffold444.17178,evm.model.scaffold367.15739,evm.model.scaffold195.11633,evm.model.scaffold89.7664,evm.model.scaffold360.15477,evm.model.scaffold865.21421,evm.model.scaffold59.5863,evm.model.scaffold578.19012,evm.model.scaffold166.10795,evm.model.scaffold546.18581,evm.model.sca…
Biological process	apoptotic signaling pathway	GO:0097190	0.101695	54	531	0.00349147	0.0357248	54	1.45641	evm.model.scaffold257.13419,evm.model.scaffold1018.22191,evm.model.scaffold1141.22698,evm.model.scaffold367.15739,evm.model.scaffold195.11636,evm.model.scaffold29.2803,evm.model.scaffold422.16882,evm.model.scaffold80.7026,evm.model.scaffold127.9368,evm.model.scaffold1579.23795,evm.model.scaffold865.21421,evm.model.scaffold699.20193,evm.model.scaffold394.16320,evm.model.scaffold1653.23894,evm.mode…
Biological process	epidermal growth factor receptor signaling pathway	GO:0007173	0.0357815	19	531	0.00350822	0.0358545	19	1.9969	evm.model.scaffold1706.23981,evm.model.scaffold865.21421,evm.model.scaffold39.3591,evm.model.scaffold298.14273,evm.model.scaffold685.20043,evm.model.scaffold37.3511,evm.model.scaffold12.1145,evm.model.scaffold610.19365,evm.model.scaffold39.3604,evm.model.scaffold227.12492,evm.model.scaffold28.2757,evm.model.scaffold258.13473,evm.model.scaffold258.13472,evm.model.scaffold275.13879,evm.model.scaffo…
Biological process	fever generation	GO:0001660	0.0094162	5	531	0.00352899	0.0360251	5	4.8263	evm.model.scaffold564.18771,evm.model.scaffold865.21421,evm.model.scaffold108.8545,evm.model.scaffold12.1152,evm.model.scaffold541.18503,
Biological process	retinal rod cell development	GO:0046548	0.0094162	5	531	0.00352899	0.0360251	5	4.8263	evm.model.scaffold426.16937,evm.model.scaffold1222.22985,evm.model.scaffold466.17565,evm.model.scaffold260.13495,evm.model.scaffold274.13767,
Biological process	negative regulation of astrocyte differentiation	GO:0048712	0.0094162	5	531	0.00352899	0.0360251	5	4.8263	evm.model.scaffold1222.22985,evm.model.scaffold435.17081,evm.model.scaffold12.1329,evm.model.scaffold260.13495,evm.model.scaffold20.1997,
Biological process	protein homooligomerization	GO:0051260	0.0433145	23	531	0.00354896	0.0361036	23	1.85415	evm.model.scaffold83.7126,evm.model.scaffold195.11636,evm.model.scaffold422.16882,evm.model.scaffold42.3806,evm.model.scaffold12.1175,evm.model.scaffold12.1152,evm.model.scaffold372.15910,evm.model.scaffold564.18750,evm.model.scaffold290.14172,evm.model.scaffold54.5530,evm.model.scaffold6.676,evm.model.scaffold6.675,evm.model.scaffold49.4413,evm.model.scaffold708.20241,evm.model.scaffold55.5589,e…
Biological process	regulation of proteolysis	GO:0030162	0.103578	55	531	0.00355378	0.036111	55	1.44928	evm.model.scaffold233.12647,evm.model.scaffold63.6075,evm.model.scaffold668.19893,evm.model.scaffold123.9227,evm.model.scaffold117.8888,evm.model.scaffold80.7026,evm.model.scaffold1579.23795,evm.model.scaffold865.21421,evm.model.scaffold699.20193,evm.model.scaffold27.2685,evm.model.scaffold1653.23894,evm.model.scaffold120.9081,evm.model.scaffold1432.23534,evm.model.scaffold1122.22625,evm.model.sc…
[truncated: 88 more rows]
