# Supplementary material for: Identification of Potential miRNA–mRNA Regulatory Network Associated with Growth and Development of Hair Follicles in Forest Musk Deer
Source: Animals (Basel). 2023 Dec 15;13(24):3869. doi: 10.3390/ani13243869 (PMC10740511; doi:10.3390/ani13243869)
Supplement: Supplementary file 1 [file animals-13-03869-s001.zip › Supplementary Table S6.xlsx]

## Sheet: Sheet1
Supplementary Table S6 KEGG pathways of differentially expressed genes of HFs (P<0.05) at anagen stage and catagen stage in the FMD
KO_ID	Term	generatio	DEGs_num	All_num	Count	Pvalue	Adjust Pvalue	enrichFactor	GeneListInSelectedSets
ko09183	Protein families: signaling and cellular processes	0.038155	225	5897	225	1.23654e-09	2.2196e-07	1.37697	[evm.model.scaffold248.13116, evm.model.scaffold544.18544, evm.model.scaffold67.6205, evm.model.scaffold117.8835, evm.model.scaffold156.10553, evm.model.scaffold901.21605, evm.model.scaffold17.1782, evm.model.scaffold926.21746, evm.model.scaffold233.12648, evm.model.scaffold593.19157, evm.model.scaffold593.19156, evm.model.scaffold341.15082, evm.model.scaffold320.14682, evm.model.scaffold69.6333,…
ko00536	Glycosaminoglycan binding proteins	0.113861	23	202	23	9.90645e-09	1.18547e-06	4.10913	[evm.model.scaffold101.8201, evm.model.scaffold162.10694, evm.model.scaffold80.6998, evm.model.scaffold142.10011, evm.model.scaffold30.2989, evm.model.scaffold191.11537, evm.model.scaffold50.4590, evm.model.scaffold104.8408, evm.model.scaffold191.11538, evm.model.scaffold69.6292, evm.model.scaffold193.11588, evm.model.scaffold127.9368, evm.model.scaffold134.9699, evm.model.scaffold298.14312, evm.…
ko04990	Domain-containing proteins not elsewhere classified	0.0669856	42	627	42	1.18623e-07	1.06465e-05	2.41744	[evm.model.scaffold10.1051, evm.model.scaffold20.2039, evm.model.scaffold351.15211, evm.model.scaffold57.5666, evm.model.scaffold50.4591, evm.model.scaffold67.6205, evm.model.scaffold719.20304, evm.model.scaffold472.17645, evm.model.scaffold610.19371, evm.model.scaffold75.6695, evm.model.scaffold901.21605, evm.model.scaffold472.17646, evm.model.scaffold543.18529, evm.model.scaffold25.2498, evm.mo…
ko04916	Melanogenesis	0.141509	15	106	15	2.2282e-07	1.59985e-05	5.10692	[evm.model.scaffold101.8201, evm.model.scaffold45.4062, evm.model.scaffold514.18196, evm.model.scaffold181.11247, evm.model.scaffold50.4590, evm.model.scaffold104.8408, evm.model.scaffold54.5545, evm.model.scaffold6.676, evm.model.scaffold59.5863, evm.model.scaffold54.5530, evm.model.scaffold108.8545, evm.model.scaffold292.14185, evm.model.scaffold354.15371, evm.model.scaffold275.13884, evm.model…
ko09133	Signaling molecules and interaction	0.0580964	47	809	47	1.29025e-06	7.72002e-05	2.09664	[evm.model.scaffold261.13531, evm.model.scaffold224.12439, evm.model.scaffold351.15333, evm.model.scaffold811.21042, evm.model.scaffold54.5565, evm.model.scaffold701.20202, evm.model.scaffold701.20201, evm.model.scaffold41.3757, evm.model.scaffold519.18258, evm.model.scaffold216.12178, evm.model.scaffold195.11633, evm.model.scaffold170.10903, evm.model.scaffold17.1782, evm.model.scaffold429.16970…
ko09130	Environmental Information Processing	0.040158	122	3038	122	6.04439e-06	0.000309991	1.44926	[evm.model.scaffold248.13116, evm.model.scaffold233.12647, evm.model.scaffold258.13473, evm.model.scaffold258.13472, evm.model.scaffold41.3757, evm.model.scaffold156.10553, evm.model.scaffold1222.22985, evm.model.scaffold639.19714, evm.model.scaffold54.5530, evm.model.scaffold17.1782, evm.model.scaffold166.10795, evm.model.scaffold101.8256, evm.model.scaffold375.15950, evm.model.scaffold778.20743…
ko04310	Wnt signaling pathway	0.0982659	17	173	17	6.50532e-06	0.000291926	3.54631	[evm.model.scaffold101.8201, evm.model.scaffold181.11247, evm.model.scaffold668.19893, evm.model.scaffold16.1696, evm.model.scaffold50.4590, evm.model.scaffold104.8408, evm.model.scaffold54.5545, evm.model.scaffold59.5863, evm.model.scaffold49.4374, evm.model.scaffold414.16778, evm.model.scaffold373.15916, evm.model.scaffold354.15371, evm.model.scaffold275.13884, evm.model.scaffold120.9059, evm.m…
ko09152	Endocrine system	0.0510806	52	1018	52	1.42328e-05	0.000567731	1.84344	[evm.model.scaffold412.16756, evm.model.scaffold182.11288, evm.model.scaffold258.13473, evm.model.scaffold1706.23981, evm.model.scaffold104.8408, evm.model.scaffold77.6782, evm.model.scaffold258.13472, evm.model.scaffold755.20553, evm.model.scaffold195.11633, evm.model.scaffold54.5530, evm.model.scaffold108.8545, evm.model.scaffold292.14185, evm.model.scaffold541.18503, evm.model.scaffold101.8256…
ko09156	Nervous system	0.060241	35	581	35	1.45444e-05	0.000522145	2.17403	[evm.model.scaffold412.16756, evm.model.scaffold20.2014, evm.model.scaffold258.13473, evm.model.scaffold51.4673, evm.model.scaffold54.5545, evm.model.scaffold258.13472, evm.model.scaffold811.21042, evm.model.scaffold701.20202, evm.model.scaffold701.20201, evm.model.scaffold117.8835, evm.model.scaffold1222.22985, evm.model.scaffold54.5530, evm.model.scaffold48.4348, evm.model.scaffold89.7664, evm.…
ko04510	Focal adhesion	0.0882353	18	204	18	1.56451e-05	0.000510601	3.18431	[evm.model.scaffold63.6075, evm.model.scaffold412.16756, evm.model.scaffold258.13473, evm.model.scaffold16.1696, evm.model.scaffold78.6910, evm.model.scaffold258.13472, evm.model.scaffold156.10549, evm.model.scaffold193.11588, evm.model.scaffold28.2757, evm.model.scaffold811.21044, evm.model.scaffold465.17515, evm.model.scaffold41.3757, evm.model.scaffold156.10553, evm.model.scaffold298.14312, ev…
ko04040	Ion channels	0.0681818	24	352	24	4.93287e-05	0.00147575	2.46061	[evm.model.scaffold165.10758, evm.model.scaffold112.8678, evm.model.scaffold811.21042, evm.model.scaffold6.779, evm.model.scaffold891.21560, evm.model.scaffold34.3290, evm.model.scaffold888.21532, evm.model.scaffold701.20202, evm.model.scaffold243.13040, evm.model.scaffold1072.22396, evm.model.scaffold701.20201, evm.model.scaffold85.7212, evm.model.scaffold90.7693, evm.model.scaffold170.10903, ev…
ko03310	Nuclear receptors	0.16	8	50	8	6.31049e-05	0.00174267	5.77422	[evm.model.scaffold50.4555, evm.model.scaffold1.32, evm.model.scaffold541.18503, evm.model.scaffold466.17565, evm.model.scaffold285.14102, evm.model.scaffold274.13767, evm.model.scaffold12.1329, evm.model.scaffold1141.22698]
ko04020	Calcium signaling pathway	0.0766129	19	248	19	6.50128e-05	0.00166711	2.76487	[evm.model.scaffold313.14534, evm.model.scaffold514.18196, evm.model.scaffold54.5545, evm.model.scaffold156.10549, evm.model.scaffold6.779, evm.model.scaffold891.21560, evm.model.scaffold811.21044, evm.model.scaffold67.6219, evm.model.scaffold465.17515, evm.model.scaffold41.3679, evm.model.scaffold6.676, evm.model.scaffold755.20553, evm.model.scaffold54.5530, evm.model.scaffold17.1782, evm.model.…
ko04022	cGMP-PKG signaling pathway	0.0851064	16	188	16	7.11259e-05	0.00170228	3.07139	[evm.model.scaffold313.14534, evm.model.scaffold412.16756, evm.model.scaffold514.18196, evm.model.scaffold466.17562, evm.model.scaffold465.17515, evm.model.scaffold243.13040, evm.model.scaffold1072.22396, evm.model.scaffold6.676, evm.model.scaffold755.20553, evm.model.scaffold216.12178, evm.model.scaffold54.5530, evm.model.scaffold108.8545, evm.model.scaffold257.13419, evm.model.scaffold333.14976…
ko09158	Development and regeneration	0.0639386	25	391	25	9.73044e-05	0.00218327	2.30747	[evm.model.scaffold412.16756, evm.model.scaffold705.20217, evm.model.scaffold54.5545, evm.model.scaffold217.12252, evm.model.scaffold247.13101, evm.model.scaffold234.12791, evm.model.scaffold17.1782, evm.model.scaffold85.7227, evm.model.scaffold166.10795, evm.model.scaffold457.17402, evm.model.scaffold30.2908, evm.model.scaffold31.3079, evm.model.scaffold234.12797, evm.model.scaffold101.8256, evm…
ko04014	Ras signaling pathway	0.0746888	18	241	18	0.000138914	0.00277056	2.69544	[evm.model.scaffold260.13495, evm.model.scaffold412.16756, evm.model.scaffold351.15266, evm.model.scaffold258.13473, evm.model.scaffold466.17562, evm.model.scaffold258.13472, evm.model.scaffold156.10549, evm.model.scaffold811.21044, evm.model.scaffold117.8847, evm.model.scaffold127.9368, evm.model.scaffold156.10553, evm.model.scaffold1222.22985, evm.model.scaffold298.14273, evm.model.scaffold234.…
ko04550	Signaling pathways regulating pluripotency of stem cells	0.0890411	13	146	13	0.00021387	0.00404101	3.21339	[evm.model.scaffold1727.23994, evm.model.scaffold101.8201, evm.model.scaffold101.8256, evm.model.scaffold412.16756, evm.model.scaffold181.11247, evm.model.scaffold50.4590, evm.model.scaffold104.8408, evm.model.scaffold54.5565, evm.model.scaffold241.12997, evm.model.scaffold59.5863, evm.model.scaffold127.9368, evm.model.scaffold354.15371, evm.model.scaffold275.13884]
ko09153	Circulatory system	0.0650155	21	323	21	0.000277153	0.0049749	2.34634	[evm.model.scaffold261.13531, evm.model.scaffold101.8256, evm.model.scaffold313.14534, evm.model.scaffold412.16756, evm.model.scaffold514.18196, evm.model.scaffold51.4673, evm.model.scaffold54.5545, evm.model.scaffold544.18544, evm.model.scaffold465.17515, evm.model.scaffold243.13040, evm.model.scaffold41.3679, evm.model.scaffold6.676, evm.model.scaffold755.20553, evm.model.scaffold85.7212, evm.m…
ko04151	PI3K-Akt signaling pathway	0.0616622	23	373	23	0.000309439	0.00482994	2.22532	[evm.model.scaffold63.6075, evm.model.scaffold248.13116, evm.model.scaffold260.13495, evm.model.scaffold412.16756, evm.model.scaffold578.19012, evm.model.scaffold16.1696, evm.model.scaffold78.6910, evm.model.scaffold51.4673, evm.model.scaffold466.17562, evm.model.scaffold156.10549, evm.model.scaffold193.11588, evm.model.scaffold28.2757, evm.model.scaffold811.21044, evm.model.scaffold41.3757, evm.…
ko09132	Signal transduction	0.0384458	94	2445	94	0.000472207	0.0067809	1.38747	[evm.model.scaffold248.13116, evm.model.scaffold412.16756, evm.model.scaffold233.12647, evm.model.scaffold258.13473, evm.model.scaffold16.1696, evm.model.scaffold104.8408, evm.model.scaffold258.13472, evm.model.scaffold54.5565, evm.model.scaffold749.20525, evm.model.scaffold41.3679, evm.model.scaffold41.3757, evm.model.scaffold749.20523, evm.model.scaffold755.20553, evm.model.scaffold156.10553, e…
ko09150	Organismal Systems	0.0351638	146	4152	146	0.0005518	0.00761909	1.26902	[evm.model.scaffold248.13116, evm.model.scaffold182.11288, evm.model.scaffold258.13473, evm.model.scaffold77.6782, evm.model.scaffold258.13472, evm.model.scaffold544.18544, evm.model.scaffold62.5967, evm.model.scaffold117.8835, evm.model.scaffold1222.22985, evm.model.scaffold61.5951, evm.model.scaffold639.19714, evm.model.scaffold54.5530, evm.model.scaffold17.1782, evm.model.scaffold292.14185, ev…
ko04010	MAPK signaling pathway	0.0637584	19	298	19	0.000677416	0.00900713	2.30097	[evm.model.scaffold101.8256, evm.model.scaffold43.3904, evm.model.scaffold260.13495, evm.model.scaffold412.16756, evm.model.scaffold351.15266, evm.model.scaffold466.17562, evm.model.scaffold156.10549, evm.model.scaffold6.779, evm.model.scaffold811.21044, evm.model.scaffold127.9368, evm.model.scaffold156.10553, evm.model.scaffold1222.22985, evm.model.scaffold85.7212, evm.model.scaffold234.12791, e…
ko04080	Neuroactive ligand-receptor interaction	0.0621118	20	322	20	0.000685965	0.00879505	2.24155	[evm.model.scaffold261.13531, evm.model.scaffold45.4062, evm.model.scaffold313.14534, evm.model.scaffold778.20743, evm.model.scaffold811.21042, evm.model.scaffold888.21532, evm.model.scaffold943.21833, evm.model.scaffold701.20202, evm.model.scaffold701.20201, evm.model.scaffold1579.23795, evm.model.scaffold216.12178, evm.model.scaffold195.11633, evm.model.scaffold90.7693, evm.model.scaffold170.10…
ko04072	Phospholipase D signaling pathway	0.0778443	13	167	13	0.000780657	0.00934186	2.80931	[evm.model.scaffold412.16756, evm.model.scaffold705.20217, evm.model.scaffold514.18196, evm.model.scaffold258.13473, evm.model.scaffold466.17562, evm.model.scaffold258.13472, evm.model.scaffold156.10549, evm.model.scaffold811.21044, evm.model.scaffold6.676, evm.model.scaffold234.12791, evm.model.scaffold54.5530, evm.model.scaffold71.6509, evm.model.scaffold234.12797]
ko04640	Hematopoietic cell lineage	0.101124	9	89	9	0.000795174	0.00920863	3.64944	[evm.model.scaffold23.2267, evm.model.scaffold248.13116, evm.model.scaffold196.11682, evm.model.scaffold78.6910, evm.model.scaffold457.17402, evm.model.scaffold28.2757, evm.model.scaffold1018.22191, evm.model.scaffold321.14720, evm.model.scaffold527.18343]
ko04360	Axon guidance	0.0732984	14	191	14	0.000900326	0.00979446	2.64526	[evm.model.scaffold165.10758, evm.model.scaffold54.5545, evm.model.scaffold217.12252, evm.model.scaffold586.19075, evm.model.scaffold247.13101, evm.model.scaffold134.9699, evm.model.scaffold234.12791, evm.model.scaffold85.7218, evm.model.scaffold17.1782, evm.model.scaffold85.7227, evm.model.scaffold30.2908, evm.model.scaffold367.15739, evm.model.scaffold31.3079, evm.model.scaffold234.12797]
ko04512	ECM-receptor interaction	0.0967742	9	93	9	0.00109198	0.0115301	3.49247	[evm.model.scaffold63.6075, evm.model.scaffold298.14312, evm.model.scaffold78.6910, evm.model.scaffold5.461, evm.model.scaffold3.276, evm.model.scaffold193.11588, evm.model.scaffold28.2757, evm.model.scaffold41.3757, evm.model.scaffold484.17805]
ko04261	Adrenergic signaling in cardiomyocytes	0.0742857	13	175	13	0.00120234	0.0123326	2.68089	[evm.model.scaffold101.8256, evm.model.scaffold313.14534, evm.model.scaffold412.16756, evm.model.scaffold514.18196, evm.model.scaffold51.4673, evm.model.scaffold54.5545, evm.model.scaffold41.3679, evm.model.scaffold6.676, evm.model.scaffold755.20553, evm.model.scaffold85.7212, evm.model.scaffold54.5530, evm.model.scaffold333.14976, evm.model.scaffold333.14978]
ko04515	Cell adhesion molecules	0.0726257	13	179	13	0.00147579	0.0139423	2.62098	[evm.model.scaffold224.12439, evm.model.scaffold351.15333, evm.model.scaffold980.22013, evm.model.scaffold78.6910, evm.model.scaffold28.2757, evm.model.scaffold56.5642, evm.model.scaffold265.13608, evm.model.scaffold265.13609, evm.model.scaffold39.3591, evm.model.scaffold45.3968, evm.model.scaffold42.3889, evm.model.scaffold265.13610, evm.model.scaffold341.15082]
ko00537	Glycosylphosphatidylinositol (GPI)-anchored proteins	0.101266	8	79	8	0.00152477	0.0140357	3.65457	[evm.model.scaffold23.2267, evm.model.scaffold196.11682, evm.model.scaffold224.12439, evm.model.scaffold840.21238, evm.model.scaffold72.6527, evm.model.scaffold804.20949, evm.model.scaffold233.12648, evm.model.scaffold943.21831]
ko04090	CD molecules	0.0564516	21	372	21	0.0016971	0.0152315	2.03728	[evm.model.scaffold23.2267, evm.model.scaffold248.13116, evm.model.scaffold196.11682, evm.model.scaffold1432.23535, evm.model.scaffold72.6527, evm.model.scaffold78.6910, evm.model.scaffold466.17562, evm.model.scaffold156.10549, evm.model.scaffold586.19075, evm.model.scaffold28.2757, evm.model.scaffold252.13298, evm.model.scaffold1018.22191, evm.model.scaffold321.14720, evm.model.scaffold127.9368,…
ko04710	Circadian rhythm	0.151515	5	33	5	0.00199789	0.0174937	5.46801	[evm.model.scaffold116.8795, evm.model.scaffold466.17565, evm.model.scaffold62.5967, evm.model.scaffold274.13767, evm.model.scaffold12.1329]
ko04024	cAMP signaling pathway	0.0649351	15	231	15	0.00202237	0.0172864	2.34343	[evm.model.scaffold412.16756, evm.model.scaffold514.18196, evm.model.scaffold5231.24653, evm.model.scaffold54.5545, evm.model.scaffold811.21042, evm.model.scaffold701.20202, evm.model.scaffold701.20201, evm.model.scaffold6.676, evm.model.scaffold755.20553, evm.model.scaffold195.11633, evm.model.scaffold234.12791, evm.model.scaffold54.5530, evm.model.scaffold257.13419, evm.model.scaffold744.20482,…
ko04015	Rap1 signaling pathway	0.0632911	15	237	15	0.00258856	0.0216115	2.28411	[evm.model.scaffold101.8256, evm.model.scaffold412.16756, evm.model.scaffold514.18196, evm.model.scaffold466.17562, evm.model.scaffold156.10549, evm.model.scaffold811.21044, evm.model.scaffold6.676, evm.model.scaffold127.9368, evm.model.scaffold156.10553, evm.model.scaffold234.12791, evm.model.scaffold54.5530, evm.model.scaffold71.6509, evm.model.scaffold457.17402, evm.model.scaffold744.20482, ev…
ko04724	Glutamatergic synapse	0.0769231	10	130	10	0.00333915	0.0272444	2.77607	[evm.model.scaffold90.7693, evm.model.scaffold514.18196, evm.model.scaffold54.5530, evm.model.scaffold88.7384, evm.model.scaffold811.21042, evm.model.scaffold89.7664, evm.model.scaffold701.20202, evm.model.scaffold701.20201, evm.model.scaffold6.676, evm.model.scaffold117.8835]
ko04371	Apelin signaling pathway	0.0723684	11	152	11	0.00342363	0.027313	2.6117	[evm.model.scaffold412.16756, evm.model.scaffold233.12647, evm.model.scaffold514.18196, evm.model.scaffold234.12791, evm.model.scaffold54.5530, evm.model.scaffold891.21560, evm.model.scaffold333.14976, evm.model.scaffold465.17515, evm.model.scaffold6.676, evm.model.scaffold234.12797, evm.model.scaffold333.14978]
ko04722	Neurotrophin signaling pathway	0.0763359	10	131	10	0.00352827	0.0275358	2.75488	[evm.model.scaffold101.8256, evm.model.scaffold120.9081, evm.model.scaffold1222.22985, evm.model.scaffold260.13495, evm.model.scaffold412.16756, evm.model.scaffold6.818, evm.model.scaffold20.2014, evm.model.scaffold258.13473, evm.model.scaffold54.5545, evm.model.scaffold258.13472]
ko04052	Cytokines and growth factors	0.0637255	13	204	13	0.00459729	0.0351155	2.29978	[evm.model.scaffold435.17065, evm.model.scaffold54.5565, evm.model.scaffold811.21044, evm.model.scaffold248.13181, evm.model.scaffold865.21421, evm.model.scaffold166.10795, evm.model.scaffold71.6509, evm.model.scaffold47.4143, evm.model.scaffold413.16776, evm.model.scaffold457.17402, evm.model.scaffold513.18193, evm.model.scaffold693.20101, evm.model.scaffold527.18343]
ko04923	Regulation of lipolysis in adipocytes	0.105263	6	57	6	0.00481329	0.0359994	3.79883	[evm.model.scaffold195.11633, evm.model.scaffold412.16756, evm.model.scaffold514.18196, evm.model.scaffold54.5530, evm.model.scaffold466.17562, evm.model.scaffold6.676]
ko04727	GABAergic synapse	0.0833333	8	96	8	0.00516318	0.0370716	3.00741	[evm.model.scaffold978.22000, evm.model.scaffold11.1123, evm.model.scaffold514.18196, evm.model.scaffold54.5530, evm.model.scaffold5.518, evm.model.scaffold48.4348, evm.model.scaffold888.21532, evm.model.scaffold6.676]
ko04270	Vascular smooth muscle contraction	0.0666667	11	165	11	0.00633142	0.0420922	2.40593	[evm.model.scaffold261.13531, evm.model.scaffold313.14534, evm.model.scaffold514.18196, evm.model.scaffold54.5530, evm.model.scaffold124.9229, evm.model.scaffold1122.22625, evm.model.scaffold544.18544, evm.model.scaffold465.17515, evm.model.scaffold243.13040, evm.model.scaffold6.676, evm.model.scaffold694.20130]
ko04810	Regulation of actin cytoskeleton	0.058296	13	223	13	0.00947433	0.0586428	2.10384	[evm.model.scaffold610.19365, evm.model.scaffold78.6910, evm.model.scaffold156.10549, evm.model.scaffold544.18544, evm.model.scaffold28.2757, evm.model.scaffold811.21044, evm.model.scaffold465.17515, evm.model.scaffold127.9368, evm.model.scaffold234.12791, evm.model.scaffold17.1782, evm.model.scaffold71.6509, evm.model.scaffold1122.22625, evm.model.scaffold234.12797]
ko09142	Cell motility	0.058296	13	223	13	0.00947433	0.0586428	2.10384	[evm.model.scaffold610.19365, evm.model.scaffold78.6910, evm.model.scaffold156.10549, evm.model.scaffold544.18544, evm.model.scaffold28.2757, evm.model.scaffold811.21044, evm.model.scaffold465.17515, evm.model.scaffold127.9368, evm.model.scaffold234.12791, evm.model.scaffold17.1782, evm.model.scaffold71.6509, evm.model.scaffold1122.22625, evm.model.scaffold234.12797]
ko04213	Longevity regulating pathway - multiple species	0.0895522	6	67	6	0.0105135	0.0618748	3.23184	[evm.model.scaffold412.16756, evm.model.scaffold514.18196, evm.model.scaffold54.5530, evm.model.scaffold466.17562, evm.model.scaffold6.676, evm.model.scaffold80.7003]
ko04926	Relaxin signaling pathway	0.0687023	9	131	9	0.0107435	0.0622084	2.47939	[evm.model.scaffold101.8256, evm.model.scaffold412.16756, evm.model.scaffold514.18196, evm.model.scaffold298.14312, evm.model.scaffold54.5530, evm.model.scaffold258.13473, evm.model.scaffold108.8545, evm.model.scaffold258.13472, evm.model.scaffold6.676]
ko04750	Inflammatory mediator regulation of TRP channels	0.0676692	9	133	9	0.0117887	0.0671767	2.44211	[evm.model.scaffold101.8256, evm.model.scaffold514.18196, evm.model.scaffold54.5530, evm.model.scaffold124.9229, evm.model.scaffold54.5545, evm.model.scaffold593.19162, evm.model.scaffold12.1152, evm.model.scaffold6.676, evm.model.scaffold694.20130]
ko04925	Aldosterone synthesis and secretion	0.0714286	8	112	8	0.0126655	0.0710458	2.57778	[evm.model.scaffold1.32, evm.model.scaffold514.18196, evm.model.scaffold54.5530, evm.model.scaffold54.5545, evm.model.scaffold6.779, evm.model.scaffold67.6219, evm.model.scaffold6.676, evm.model.scaffold755.20553]
ko04713	Circadian entrainment	0.0707965	8	113	8	0.0133121	0.0724096	2.55497	[evm.model.scaffold116.8795, evm.model.scaffold514.18196, evm.model.scaffold54.5530, evm.model.scaffold54.5545, evm.model.scaffold811.21042, evm.model.scaffold6.779, evm.model.scaffold891.21560, evm.model.scaffold6.676]
ko09159	Environmental adaptation	0.0498534	17	341	17	0.0145878	0.0781647	1.79915	[evm.model.scaffold101.8256, evm.model.scaffold360.15531, evm.model.scaffold514.18196, evm.model.scaffold54.5545, evm.model.scaffold811.21042, evm.model.scaffold6.779, evm.model.scaffold891.21560, evm.model.scaffold466.17565, evm.model.scaffold62.5967, evm.model.scaffold6.676, evm.model.scaffold12.1329, evm.model.scaffold127.9368, evm.model.scaffold50.4555, evm.model.scaffold116.8795, evm.model.s…
ko04961	Endocrine and other factor-regulated calcium reabsorption	0.0925926	5	54	5	0.0165966	0.0876202	3.34156	[evm.model.scaffold541.18503, evm.model.scaffold333.14976, evm.model.scaffold6.676, evm.model.scaffold333.14978, evm.model.scaffold755.20553]
ko04911	Insulin secretion	0.0729167	7	96	7	0.0172523	0.0897621	2.63148	[evm.model.scaffold85.7215, evm.model.scaffold514.18196, evm.model.scaffold54.5530, evm.model.scaffold54.5545, evm.model.scaffold689.20074, evm.model.scaffold243.13040, evm.model.scaffold6.676]
ko04921	Oxytocin signaling pathway	0.060241	10	166	10	0.0174281	0.089381	2.17403	[evm.model.scaffold85.7212, evm.model.scaffold514.18196, evm.model.scaffold54.5530, evm.model.scaffold54.5545, evm.model.scaffold891.21560, evm.model.scaffold257.13419, evm.model.scaffold67.6219, evm.model.scaffold465.17515, evm.model.scaffold367.15739, evm.model.scaffold6.676]
ko04380	Osteoclast differentiation	0.0650407	8	123	8	0.0211631	0.102669	2.34724	[evm.model.scaffold101.8256, evm.model.scaffold364.15658, evm.model.scaffold50.4555, evm.model.scaffold412.16756, evm.model.scaffold391.16267, evm.model.scaffold166.10795, evm.model.scaffold457.17402, evm.model.scaffold257.13419]
ko04929	GnRH secretion	0.0735294	5	68	5	0.0401003	0.182228	2.65359	[evm.model.scaffold412.16756, evm.model.scaffold165.10758, evm.model.scaffold372.15910, evm.model.scaffold6.779, evm.model.scaffold689.20074]
ko09155	Excretory system	0.0545455	9	165	9	0.0405156	0.179569	1.96848	[evm.model.scaffold6.818, evm.model.scaffold466.17562, evm.model.scaffold541.18503, evm.model.scaffold285.14102, evm.model.scaffold333.14976, evm.model.scaffold6.676, evm.model.scaffold333.14978, evm.model.scaffold1015.22174, evm.model.scaffold755.20553]
ko04918	Thyroid hormone synthesis	0.0659341	6	91	6	0.0406466	0.177953	2.37949	[evm.model.scaffold73.6573, evm.model.scaffold384.16141, evm.model.scaffold514.18196, evm.model.scaffold54.5530, evm.model.scaffold384.16138, evm.model.scaffold6.676]
ko04060	Cytokine-cytokine receptor interaction	0.048583	12	247	12	0.0429598	0.185814	1.75331	[evm.model.scaffold391.16267, evm.model.scaffold865.21421, evm.model.scaffold17.1782, evm.model.scaffold166.10795, evm.model.scaffold47.4143, evm.model.scaffold413.16776, evm.model.scaffold457.17402, evm.model.scaffold54.5565, evm.model.scaffold693.20101, evm.model.scaffold28.2738, evm.model.scaffold248.13181, evm.model.scaffold527.18343]
ko04610	Complement and coagulation cascades	0.0704225	5	71	5	0.0468843	0.200375	2.54147	[evm.model.scaffold23.2267, evm.model.scaffold196.11682, evm.model.scaffold617.19449, evm.model.scaffold1432.23534, evm.model.scaffold120.9152]
ko04150	mTOR signaling pathway	0.0526316	9	171	9	0.0488936	0.206503	1.89942	[evm.model.scaffold101.8201, evm.model.scaffold412.16756, evm.model.scaffold181.11247, evm.model.scaffold50.4590, evm.model.scaffold104.8408, evm.model.scaffold466.17562, evm.model.scaffold354.15371, evm.model.scaffold275.13884, evm.model.scaffold59.5863]
ko04723	Retrograde endocannabinoid signaling	0.0551724	8	145	8	0.0488962	0.204113	1.99111	[evm.model.scaffold101.8256, evm.model.scaffold360.15531, evm.model.scaffold514.18196, evm.model.scaffold54.5530, evm.model.scaffold5.518, evm.model.scaffold811.21042, evm.model.scaffold888.21532, evm.model.scaffold6.676]
ko04974	Protein digestion and absorption	0.0583333	7	120	7	0.0494585	0.204088	2.10519	[evm.model.scaffold41.3773, evm.model.scaffold298.14312, evm.model.scaffold142.10011, evm.model.scaffold30.2989, evm.model.scaffold200.11734, evm.model.scaffold333.14976, evm.model.scaffold333.14978]
ko09144	Cellular community - eukaryotes	0.0363467	39	1073	39	0.0499153	0.203632	1.31171	[evm.model.scaffold1727.23994, evm.model.scaffold101.8201, evm.model.scaffold412.16756, evm.model.scaffold258.13473, evm.model.scaffold16.1696, evm.model.scaffold50.4590, evm.model.scaffold51.4673, evm.model.scaffold104.8408, evm.model.scaffold258.13472, evm.model.scaffold544.18544, evm.model.scaffold54.5565, evm.model.scaffold811.21044, evm.model.scaffold41.3757, evm.model.scaffold59.5863, evm.m…
