# Supplementary material for: Identification of Potential miRNA–mRNA Regulatory Network Associated with Growth and Development of Hair Follicles in Forest Musk Deer
Source: Animals (Basel). 2023 Dec 15;13(24):3869. doi: 10.3390/ani13243869 (PMC10740511; doi:10.3390/ani13243869)
Supplement: Supplementary file 1 [file animals-13-03869-s001.zip › Supplementary Table S7.xlsx]

## Sheet: Sheet1
Supplementary Table S7 The DEG–DEG pairs were predicted in the HFs of FMD at the anagen vs. catagen groups contrasts
#node1	node2	node1_string_id	node2_string_id	neighborhood_on_chromosome	gene_fusion	phylogenetic_cooccurrence	homology	coexpression	experimentally_determined_interaction	database_annotated	automated_textmining	combined_score
ABCC9	ADGRA2	68415.ENSMMSP00000031514	68415.ENSMMSP00000004808	0	0	0	0	0.053	0	0	0.457	0.463
ABCC9	HIP1	68415.ENSMMSP00000031514	68415.ENSMMSP00000007694	0	0	0	0	0	0.195	0.351	0.081	0.477
ABCC9	ACADL	68415.ENSMMSP00000031514	68415.ENSMMSP00000026523	0	0	0	0	0.062	0	0.423	0.132	0.489
ABCC9	DAB2	68415.ENSMMSP00000031514	68415.ENSMMSP00000026569	0	0	0	0	0.075	0.094	0.478	0	0.524
ABCC9	KCNJ8	68415.ENSMMSP00000031514	68415.ENSMMSP00000031480	0	0	0	0	0.348	0.915	0.954	0.737	0.999
ABCC9	ST8SIA1	68415.ENSMMSP00000031514	68415.ENSMMSP00000031578	0	0	0	0	0	0	0	0.479	0.479
ACADL	SBSPON	68415.ENSMMSP00000026523	68415.ENSMMSP00000013956	0.049	0	0	0	0.153	0	0.454	0.086	0.544
ACADL	CYP4X1	68415.ENSMMSP00000026523	68415.ENSMMSP00000019312	0	0	0	0	0	0.067	0.395	0.046	0.414
ACADL	PPARG	68415.ENSMMSP00000026523	68415.ENSMMSP00000020067	0	0	0	0	0	0.064	0	0.533	0.544
ACADL	DHRS12	68415.ENSMMSP00000026523	68415.ENSMMSP00000020176	0.042	0	0	0	0.061	0.063	0.404	0.056	0.439
ACADL	HMGCLL1	68415.ENSMMSP00000026523	68415.ENSMMSP00000027637	0.073	0	0	0	0.102	0.084	0.172	0.293	0.472
ACTL8	AR	68415.ENSMMSP00000009105	68415.ENSMMSP00000000719	0	0	0	0	0	0.088	0.252	0.325	0.499
ACTL8	TGFB1I1	68415.ENSMMSP00000009105	68415.ENSMMSP00000003306	0	0	0	0	0.058	0.216	0.457	0.148	0.612
ACTL8	ITGA2	68415.ENSMMSP00000009105	68415.ENSMMSP00000005730	0	0	0	0	0	0	0.789	0.21	0.826
ACTL8	ESR1	68415.ENSMMSP00000009105	68415.ENSMMSP00000005779	0	0	0	0	0	0.177	0.064	0.459	0.546
ACTL8	TLR2	68415.ENSMMSP00000009105	68415.ENSMMSP00000011847	0	0	0	0	0	0.173	0	0.328	0.42
ACTL8	TYR	68415.ENSMMSP00000009105	68415.ENSMMSP00000012485	0	0	0	0	0	0.186	0.057	0.328	0.439
ACTL8	CAV2	68415.ENSMMSP00000009105	68415.ENSMMSP00000013314	0	0	0	0	0.054	0.109	0.262	0.208	0.441
ACTL8	SMARCA1	68415.ENSMMSP00000009105	68415.ENSMMSP00000009182	0	0	0	0	0	0.235	0.378	0.043	0.504
ACTL8	MYH3	68415.ENSMMSP00000009105	68415.ENSMMSP00000032151	0	0	0	0	0.068	0.392	0.24	0.087	0.554
ACTL8	CAV1	68415.ENSMMSP00000009105	68415.ENSMMSP00000013351	0	0	0	0	0.054	0.109	0.431	0.335	0.638
ACTL8	ITGA5	68415.ENSMMSP00000009105	68415.ENSMMSP00000011129	0	0	0	0	0	0	0.789	0.21	0.826
ACTL8	PPARG	68415.ENSMMSP00000009105	68415.ENSMMSP00000020067	0	0	0	0	0	0.088	0.789	0.369	0.867
ACTL8	MYH11	68415.ENSMMSP00000009105	68415.ENSMMSP00000021250	0	0	0	0	0.068	0.524	0.789	0.085	0.902
ADAMTS10	FIBIN	68415.ENSMMSP00000004876	68415.ENSMMSP00000001092	0	0	0	0	0	0	0	0.479	0.479
ADAMTS10	LTBP2	68415.ENSMMSP00000004876	68415.ENSMMSP00000028848	0	0	0	0	0	0.103	0.063	0.552	0.59
ADAMTSL1	SPON2	68415.ENSMMSP00000002491	68415.ENSMMSP00000014019	0	0	0	0	0	0	0.534	0.047	0.536
ADAMTSL3	SPON2	68415.ENSMMSP00000030063	68415.ENSMMSP00000014019	0	0	0	0	0	0	0.534	0.047	0.536
ADAMTSL3	GPC2	68415.ENSMMSP00000030063	68415.ENSMMSP00000017250	0	0	0	0	0	0	0	0.48	0.48
ADAMTSL3	AGMO	68415.ENSMMSP00000030063	68415.ENSMMSP00000033234	0	0	0	0	0	0	0	0.601	0.601
ADCY2	PDE7B	68415.ENSMMSP00000027941	68415.ENSMMSP00000000149	0	0	0	0	0	0.225	0.847	0.087	0.882
ADCY2	GABRE	68415.ENSMMSP00000027941	68415.ENSMMSP00000003960	0	0	0	0	0	0	0	0.457	0.457
ADCY2	AKT3	68415.ENSMMSP00000027941	68415.ENSMMSP00000004472	0	0	0	0	0	0.111	0.851	0.078	0.867
ADCY2	ADCY9	68415.ENSMMSP00000027941	68415.ENSMMSP00000009162	0	0	0	0.71	0.046	0.243	0.645	0.254	0.783
ADCY2	CAMK2B	68415.ENSMMSP00000027941	68415.ENSMMSP00000014580	0	0	0	0	0.063	0.061	0.806	0.214	0.847
ADCY2	ENPP1	68415.ENSMMSP00000027941	68415.ENSMMSP00000024162	0	0	0	0	0	0	0.847	0.049	0.848
ADCY9	PDE7B	68415.ENSMMSP00000009162	68415.ENSMMSP00000000149	0	0	0	0	0	0.225	0.863	0.196	0.907
ADCY9	MYLK4	68415.ENSMMSP00000009162	68415.ENSMMSP00000002205	0	0	0	0	0	0	0.379	0.132	0.437
ADCY9	GABRE	68415.ENSMMSP00000009162	68415.ENSMMSP00000003960	0	0	0	0	0	0	0	0.457	0.457
ADCY9	AKT3	68415.ENSMMSP00000009162	68415.ENSMMSP00000004472	0	0	0	0	0	0.111	0.863	0.05	0.874
ADCY9	ADRA1B	68415.ENSMMSP00000009162	68415.ENSMMSP00000006770	0	0	0	0	0	0	0.388	0.067	0.404
ADCY9	CAMK1	68415.ENSMMSP00000009162	68415.ENSMMSP00000031981	0	0	0	0	0	0	0.497	0.048	0.5
ADCY9	ADRA2C	68415.ENSMMSP00000009162	68415.ENSMMSP00000025122	0	0	0	0	0	0	0.645	0.067	0.654
ADCY9	CAMK2B	68415.ENSMMSP00000009162	68415.ENSMMSP00000014580	0	0	0	0	0	0.061	0.806	0.29	0.859
ADCY9	ENPP1	68415.ENSMMSP00000009162	68415.ENSMMSP00000024162	0	0	0	0	0	0	0.884	0.059	0.886
ADGRA2	UNC5C	68415.ENSMMSP00000004808	68415.ENSMMSP00000026803	0	0	0	0	0	0.238	0	0.318	0.458
ADGRA2	WNT7B	68415.ENSMMSP00000004808	68415.ENSMMSP00000031359	0	0	0	0	0	0	0	0.515	0.515
ADGRA2	GDF10	68415.ENSMMSP00000004808	68415.ENSMMSP00000026303	0	0	0	0	0	0.099	0.487	0.062	0.528
ADGRA2	ISM1	68415.ENSMMSP00000004808	68415.ENSMMSP00000029482	0	0	0	0	0	0	0	0.535	0.535
ADGRA2	WNT7A	68415.ENSMMSP00000004808	68415.ENSMMSP00000032212	0	0	0	0	0	0	0	0.715	0.715
ADGRG2	TENM1	68415.ENSMMSP00000020416	68415.ENSMMSP00000008849	0	0	0	0	0.063	0.421	0	0.163	0.506
ADGRG2	UNC5C	68415.ENSMMSP00000020416	68415.ENSMMSP00000026803	0	0	0	0	0	0.479	0	0	0.479
ADRA1B	EDNRB	68415.ENSMMSP00000006770	68415.ENSMMSP00000003719	0	0	0	0.58	0.091	0	0	0.625	0.644
ADRA1B	ADRA2C	68415.ENSMMSP00000006770	68415.ENSMMSP00000025122	0	0	0	0.773	0.068	0.084	0.358	0.09	0.434
ADRA1B	NPY	68415.ENSMMSP00000006770	68415.ENSMMSP00000009758	0	0	0	0	0	0.127	0.368	0.065	0.439
ADRA1B	CXCR4	68415.ENSMMSP00000006770	68415.ENSMMSP00000027407	0	0	0	0.61	0.062	0.573	0	0.075	0.597
ADRA2C	NPY	68415.ENSMMSP00000025122	68415.ENSMMSP00000009758	0	0	0	0	0	0.127	0.487	0.13	0.576
AGMO	DPYD	68415.ENSMMSP00000033234	68415.ENSMMSP00000023697	0	0	0	0	0.067	0	0	0.725	0.732
AGMO	ALPK1	68415.ENSMMSP00000033234	68415.ENSMMSP00000032525	0	0	0	0	0	0	0	0.725	0.725
AKT3	GEM	68415.ENSMMSP00000004472	68415.ENSMMSP00000001346	0	0	0	0	0.063	0.184	0.256	0.098	0.418
AKT3	IRF4	68415.ENSMMSP00000004472	68415.ENSMMSP00000002712	0	0	0	0	0	0.248	0.378	0.084	0.534
AKT3	PPP2R2B	68415.ENSMMSP00000004472	68415.ENSMMSP00000003455	0	0	0	0	0	0.162	0.863	0.044	0.88
AKT3	RRAS	68415.ENSMMSP00000004472	68415.ENSMMSP00000003462	0	0	0	0	0.063	0.184	0.256	0.126	0.436
AKT3	NCF4	68415.ENSMMSP00000004472	68415.ENSMMSP00000022976	0	0	0	0	0.077	0.195	0.058	0.244	0.4
AKT3	PPARG	68415.ENSMMSP00000004472	68415.ENSMMSP00000020067	0	0	0	0	0.067	0.151	0.058	0.293	0.401
AKT3	SHC3	68415.ENSMMSP00000004472	68415.ENSMMSP00000018413	0	0	0	0	0	0.182	0.133	0.252	0.423
AKT3	LAMB2	68415.ENSMMSP00000004472	68415.ENSMMSP00000020179	0	0	0	0	0	0.163	0.365	0	0.445
AKT3	SLC38A4	68415.ENSMMSP00000004472	68415.ENSMMSP00000009532	0	0	0	0	0	0.169	0.369	0	0.453
AKT3	SLC38A5	68415.ENSMMSP00000004472	68415.ENSMMSP00000018761	0	0	0	0	0	0.169	0.369	0	0.453
AKT3	CRACR2A	68415.ENSMMSP00000004472	68415.ENSMMSP00000023043	0	0	0	0	0	0.103	0.382	0.129	0.474
AKT3	ITGA5	68415.ENSMMSP00000004472	68415.ENSMMSP00000011129	0	0	0	0	0.067	0.07	0.431	0.082	0.486
AKT3	REM1	68415.ENSMMSP00000004472	68415.ENSMMSP00000021019	0	0	0	0	0.063	0.184	0.256	0.212	0.491
AKT3	ESR1	68415.ENSMMSP00000004472	68415.ENSMMSP00000005779	0	0	0	0	0	0.151	0.058	0.456	0.526
AKT3	FOXC2	68415.ENSMMSP00000004472	68415.ENSMMSP00000012422	0	0	0	0	0	0.248	0.378	0.084	0.534
AKT3	DNER	68415.ENSMMSP00000004472	68415.ENSMMSP00000010662	0	0	0	0	0	0.174	0.478	0	0.55
AKT3	TP73	68415.ENSMMSP00000004472	68415.ENSMMSP00000007168	0	0	0	0	0	0.129	0.497	0.186	0.612
AKT3	NR4A2	68415.ENSMMSP00000004472	68415.ENSMMSP00000032855	0	0	0	0	0	0.087	0.616	0.044	0.635
AKT3	TNS2	68415.ENSMMSP00000004472	68415.ENSMMSP00000030050	0	0	0	0	0	0.551	0.073	0.217	0.645
AKT3	MATK	68415.ENSMMSP00000004472	68415.ENSMMSP00000030820	0	0	0.131	0.574	0	0.178	0.478	0.167	0.648
AKT3	MAPK11	68415.ENSMMSP00000004472	68415.ENSMMSP00000024879	0	0	0.137	0.619	0.044	0.239	0.834	0.071	0.885
AKT3	MAP3K8	68415.ENSMMSP00000004472	68415.ENSMMSP00000028595	0	0	0	0.567	0.09	0.122	0.884	0.069	0.902
AKT3	TCL1A	68415.ENSMMSP00000004472	68415.ENSMMSP00000009437	0	0	0	0	0	0.679	0.884	0.133	0.964
ALPK1	TDRD7	68415.ENSMMSP00000032525	68415.ENSMMSP00000010742	0	0	0	0	0.888	0	0	0	0.888
ALPK1	AXL	68415.ENSMMSP00000032525	68415.ENSMMSP00000027678	0	0	0	0	0	0	0.459	0.046	0.461
AMTN	COL17A1	68415.ENSMMSP00000028850	68415.ENSMMSP00000030799	0	0	0	0	0	0	0	0.457	0.457
ANGPTL2	FIBIN	68415.ENSMMSP00000025747	68415.ENSMMSP00000001092	0	0	0	0	0.07	0	0	0.512	0.526
AP3M2	KCNQ4	68415.ENSMMSP00000008565	68415.ENSMMSP00000006314	0	0	0	0	0	0.058	0.681	0	0.686
AP3M2	KRT36	68415.ENSMMSP00000008565	68415.ENSMMSP00000019021	0	0	0	0	0	0	0	0.537	0.537
APBA2	LTBP4	68415.ENSMMSP00000030518	68415.ENSMMSP00000000473	0	0	0	0	0	0.096	0	0.48	0.509
APBA2	METRN	68415.ENSMMSP00000030518	68415.ENSMMSP00000004055	0	0	0	0	0	0	0	0.748	0.748
APBA2	KCNA7	68415.ENSMMSP00000030518	68415.ENSMMSP00000004932	0	0	0	0	0	0	0	0.457	0.457
APBA2	RIMS3	68415.ENSMMSP00000030518	68415.ENSMMSP00000006500	0	0	0	0	0.1	0	0.599	0.093	0.644
APBA2	UNC13C	68415.ENSMMSP00000030518	68415.ENSMMSP00000009119	0	0	0	0	0	0	0.599	0.331	0.72
APBA2	CAMK2B	68415.ENSMMSP00000030518	68415.ENSMMSP00000014580	0	0	0	0	0	0.695	0.608	0.205	0.896
APBA2	RAB6B	68415.ENSMMSP00000030518	68415.ENSMMSP00000016046	0	0	0	0	0	0.526	0	0.048	0.529
APBA2	DLG2	68415.ENSMMSP00000030518	68415.ENSMMSP00000025699	0	0	0	0.551	0	0.321	0.471	0.068	0.635
AR	NR4A2	68415.ENSMMSP00000000719	68415.ENSMMSP00000032855	0	0	0	0.585	0	0.237	0.213	0.134	0.434
AR	NPAS2	68415.ENSMMSP00000000719	68415.ENSMMSP00000002079	0	0	0	0	0	0.31	0.249	0.049	0.464
AR	INSR	68415.ENSMMSP00000000719	68415.ENSMMSP00000002303	0	0	0	0	0.1	0.17	0.224	0.194	0.47
AR	MAOA	68415.ENSMMSP00000000719	68415.ENSMMSP00000013867	0	0	0	0	0	0.159	0.133	0.336	0.473
AR	ZBTB16	68415.ENSMMSP00000000719	68415.ENSMMSP00000028716	0	0	0	0	0	0.546	0.057	0.21	0.632
AR	ESR1	68415.ENSMMSP00000000719	68415.ENSMMSP00000005779	0	0	0	0.655	0.166	0	0	0.601	0.653
AR	CCND3	68415.ENSMMSP00000000719	68415.ENSMMSP00000012963	0	0	0	0	0	0.572	0.058	0.211	0.654
AR	NR3C2	68415.ENSMMSP00000000719	68415.ENSMMSP00000012530	0	0	0	0.776	0	0	0.651	0.239	0.723
AR	TGFB1I1	68415.ENSMMSP00000000719	68415.ENSMMSP00000003306	0	0	0	0	0	0.59	0	0.48	0.777
ARHGDIG	GEM	68415.ENSMMSP00000006458	68415.ENSMMSP00000001346	0	0	0	0	0.049	0.295	0.259	0.069	0.475
ARHGDIG	RRAS	68415.ENSMMSP00000006458	68415.ENSMMSP00000003462	0	0	0	0	0.066	0.295	0.259	0.091	0.497
ARHGDIG	MAG	68415.ENSMMSP00000006458	68415.ENSMMSP00000003982	0	0	0	0	0	0	0.49	0.081	0.511
ARHGDIG	RASL12	68415.ENSMMSP00000006458	68415.ENSMMSP00000025687	0	0	0	0	0.049	0.295	0.259	0.069	0.475
ARHGDIG	CAV1	68415.ENSMMSP00000006458	68415.ENSMMSP00000013351	0	0	0	0	0	0	0.48	0.067	0.494
ARHGDIG	DIRAS3	68415.ENSMMSP00000006458	68415.ENSMMSP00000007044	0	0	0	0	0.066	0.295	0.259	0.091	0.497
ARHGDIG	REM1	68415.ENSMMSP00000006458	68415.ENSMMSP00000021019	0	0	0	0	0.049	0.295	0.259	0.127	0.508
ARHGDIG	CAV2	68415.ENSMMSP00000006458	68415.ENSMMSP00000013314	0	0	0	0	0	0	0.478	0.133	0.528
ARHGDIG	NCF4	68415.ENSMMSP00000006458	68415.ENSMMSP00000022976	0	0	0	0	0.076	0.077	0	0.509	0.544
ARHGEF15	ARHGEF6	68415.ENSMMSP00000022696	68415.ENSMMSP00000007951	0	0	0	0	0	0	0.168	0.322	0.411
ARHGEF15	EPHA7	68415.ENSMMSP00000022696	68415.ENSMMSP00000017465	0	0	0	0	0	0.129	0.478	0.123	0.566
ARHGEF15	MATK	68415.ENSMMSP00000022696	68415.ENSMMSP00000030820	0	0	0	0	0	0.062	0.464	0	0.475
ARHGEF6	GEM	68415.ENSMMSP00000007951	68415.ENSMMSP00000001346	0	0	0	0	0	0.171	0.382	0.046	0.468
ARHGEF6	TGFB1I1	68415.ENSMMSP00000007951	68415.ENSMMSP00000003306	0	0	0	0	0	0.241	0.515	0.22	0.687
ARHGEF6	RRAS	68415.ENSMMSP00000007951	68415.ENSMMSP00000003462	0	0	0	0	0	0.171	0.827	0.147	0.866
ARHGEF6	DIRAS3	68415.ENSMMSP00000007951	68415.ENSMMSP00000007044	0	0	0	0	0	0.171	0.364	0.077	0.47
ARHGEF6	RASL12	68415.ENSMMSP00000007951	68415.ENSMMSP00000025687	0	0	0	0	0	0.171	0.305	0.046	0.402
ARHGEF6	CLMN	68415.ENSMMSP00000007951	68415.ENSMMSP00000009715	0	0	0	0	0	0	0.459	0.046	0.461
ARHGEF6	GAS2	68415.ENSMMSP00000007951	68415.ENSMMSP00000030936	0	0	0	0	0	0	0.459	0.046	0.461
ARHGEF6	EPHA7	68415.ENSMMSP00000007951	68415.ENSMMSP00000017465	0	0	0	0	0	0.08	0.478	0.046	0.501
ARHGEF6	PDLIM3	68415.ENSMMSP00000007951	68415.ENSMMSP00000025908	0	0	0	0	0	0.187	0.416	0.123	0.547
ARHGEF6	DLG2	68415.ENSMMSP00000007951	68415.ENSMMSP00000025699	0	0	0	0	0.062	0.065	0.478	0.175	0.571
ARHGEF6	REM1	68415.ENSMMSP00000007951	68415.ENSMMSP00000021019	0	0	0	0	0	0.171	0.493	0.067	0.573
ARHGEF6	MATK	68415.ENSMMSP00000007951	68415.ENSMMSP00000030820	0	0	0	0	0.067	0.08	0.478	0.234	0.61
ARHGEF6	DST	68415.ENSMMSP00000007951	68415.ENSMMSP00000026564	0	0	0	0	0	0	0.588	0.129	0.625
ARHGEF6	SHANK2	68415.ENSMMSP00000007951	68415.ENSMMSP00000030491	0	0	0	0	0	0.615	0	0.206	0.681
ATOH8	TGFB1I1	68415.ENSMMSP00000016281	68415.ENSMMSP00000003306	0	0	0	0	0	0	0	0.535	0.535
ATOH8	TCF4	68415.ENSMMSP00000016281	68415.ENSMMSP00000007913	0	0	0	0	0	0.567	0	0.08	0.584
ATOH8	PRSS23	68415.ENSMMSP00000016281	68415.ENSMMSP00000013140	0	0	0	0	0	0	0	0.536	0.536
ATOH8	LTBP2	68415.ENSMMSP00000016281	68415.ENSMMSP00000028848	0	0	0	0	0	0	0	0.409	0.408
ATOH8	ZBTB47	68415.ENSMMSP00000016281	68415.ENSMMSP00000027842	0	0	0	0	0	0	0	0.519	0.519
ATP2B3	SLC43A1	68415.ENSMMSP00000023370	68415.ENSMMSP00000000225	0	0	0	0	0	0.078	0.046	0.534	0.554
ATP2B3	CACNA1H	68415.ENSMMSP00000023370	68415.ENSMMSP00000003432	0	0	0	0	0.055	0	0	0.512	0.519
ATP2B3	TNNC1	68415.ENSMMSP00000023370	68415.ENSMMSP00000011988	0	0	0	0	0.042	0.241	0	0.457	0.57
ATP2B3	HCN1	68415.ENSMMSP00000023370	68415.ENSMMSP00000028906	0	0	0	0	0	0	0	0.492	0.491
ATP2B3	MYH3	68415.ENSMMSP00000023370	68415.ENSMMSP00000032151	0	0	0	0	0	0.08	0	0.504	0.524
ATP6V0D2	GEM	68415.ENSMMSP00000007953	68415.ENSMMSP00000001346	0	0	0	0	0	0.053	0.469	0.085	0.499
ATP6V0D2	RRAS	68415.ENSMMSP00000007953	68415.ENSMMSP00000003462	0	0	0	0	0	0.053	0.469	0	0.475
ATP6V0D2	DIRAS3	68415.ENSMMSP00000007953	68415.ENSMMSP00000007044	0	0	0	0	0	0.053	0.469	0	0.475
ATP6V0D2	TRIM15	68415.ENSMMSP00000007953	68415.ENSMMSP00000008213	0	0	0	0	0	0	0	0.452	0.452
ATP6V0D2	RASL12	68415.ENSMMSP00000007953	68415.ENSMMSP00000025687	0	0	0	0	0	0.053	0.469	0	0.475
ATP6V0D2	REM1	68415.ENSMMSP00000007953	68415.ENSMMSP00000021019	0	0	0	0	0	0.053	0.469	0.085	0.499
ATP6V0D2	SLC32A1	68415.ENSMMSP00000007953	68415.ENSMMSP00000029112	0	0	0	0	0	0.164	0.469	0.061	0.546
ATP6V0D2	SLC38A5	68415.ENSMMSP00000007953	68415.ENSMMSP00000018761	0	0	0	0	0	0.175	0.486	0.065	0.568
ATP6V0D2	SLC38A4	68415.ENSMMSP00000007953	68415.ENSMMSP00000009532	0	0	0	0	0	0.175	0.486	0.065	0.568
ATP6V0D2	NFATC1	68415.ENSMMSP00000007953	68415.ENSMMSP00000009619	0	0	0	0	0	0	0	0.728	0.728
AXL	TNFSF10	68415.ENSMMSP00000027678	68415.ENSMMSP00000005166	0	0	0	0	0	0.237	0.342	0.057	0.485
AXL	CSF1	68415.ENSMMSP00000027678	68415.ENSMMSP00000006020	0	0	0	0	0	0.068	0.099	0.599	0.633
AXL	NFATC4	68415.ENSMMSP00000027678	68415.ENSMMSP00000008469	0	0	0	0	0	0.213	0.457	0.079	0.572
AXL	CDH13	68415.ENSMMSP00000027678	68415.ENSMMSP00000010325	0	0	0	0	0	0.115	0.061	0.457	0.509
AXL	CD19	68415.ENSMMSP00000027678	68415.ENSMMSP00000010866	0	0	0	0	0	0.078	0.489	0.118	0.548
AXL	TGFB2	68415.ENSMMSP00000027678	68415.ENSMMSP00000011967	0	0	0	0	0	0.232	0.068	0.239	0.407
AXL	CAMK2B	68415.ENSMMSP00000027678	68415.ENSMMSP00000014580	0	0	0	0	0	0.058	0.478	0.176	0.559
AXL	LOXL2	68415.ENSMMSP00000027678	68415.ENSMMSP00000017174	0	0	0	0	0	0.174	0.062	0.288	0.4
AXL	SHC3	68415.ENSMMSP00000027678	68415.ENSMMSP00000018413	0	0	0	0	0	0.204	0.884	0.108	0.91
AXL	CD3G	68415.ENSMMSP00000027678	68415.ENSMMSP00000024600	0	0	0	0	0.041	0.237	0.615	0.049	0.696
AXL	DLG2	68415.ENSMMSP00000027678	68415.ENSMMSP00000025699	0	0	0	0	0	0.159	0.321	0	0.404
AXL	BANK1	68415.ENSMMSP00000027678	68415.ENSMMSP00000029121	0	0	0	0	0	0.113	0.353	0	0.401
AXL	MATK	68415.ENSMMSP00000027678	68415.ENSMMSP00000030820	0	0	0	0.724	0	0.237	0.256	0	0.408
AXL	GAS2	68415.ENSMMSP00000027678	68415.ENSMMSP00000030936	0	0	0	0	0	0.044	0.107	0.382	0.426
AXL	KDR	68415.ENSMMSP00000027678	68415.ENSMMSP00000028190	0	0	0	0.605	0	0.159	0.607	0	0.655
B3GNT9	GALNT18	68415.ENSMMSP00000003013	68415.ENSMMSP00000013816	0	0	0	0	0	0	0.468	0.124	0.514
B3GNT9	ST3GAL6	68415.ENSMMSP00000003013	68415.ENSMMSP00000005224	0	0	0	0	0	0	0.537	0.125	0.577
BANK1	CD19	68415.ENSMMSP00000029121	68415.ENSMMSP00000010866	0	0	0	0	0.303	0	0.547	0.143	0.705
BSN	PCLO	68415.ENSMMSP00000022823	68415.ENSMMSP00000001730	0	0	0.098	0.695	0.302	0.086	0.616	0.156	0.779
BSN	GRIA2	68415.ENSMMSP00000022823	68415.ENSMMSP00000007755	0	0	0	0	0.324	0	0	0.215	0.446
C3	NPY	68415.ENSMMSP00000009855	68415.ENSMMSP00000009758	0	0	0	0	0	0	0.478	0.133	0.528
C3	SCML4	68415.ENSMMSP00000009855	68415.ENSMMSP00000012291	0	0	0	0	0	0.246	0.286	0	0.438
C3	KLKB1	68415.ENSMMSP00000009855	68415.ENSMMSP00000027169	0	0	0	0	0	0.236	0.151	0.212	0.444
C3	CPA6	68415.ENSMMSP00000009855	68415.ENSMMSP00000020263	0	0	0	0	0	0.069	0.478	0.069	0.508
C3	DAB2	68415.ENSMMSP00000009855	68415.ENSMMSP00000026569	0	0	0	0	0	0.24	0.37	0.071	0.516
C3	TF	68415.ENSMMSP00000009855	68415.ENSMMSP00000016134	0	0	0	0	0.09	0	0.057	0.619	0.644
C3	CD19	68415.ENSMMSP00000009855	68415.ENSMMSP00000010866	0	0	0	0	0	0	0.612	0.232	0.689
C3	CBX7	68415.ENSMMSP00000009855	68415.ENSMMSP00000021001	0	0	0	0	0	0.386	0.628	0.069	0.768
CACNA1H	SLC18A1	68415.ENSMMSP00000003432	68415.ENSMMSP00000008451	0	0	0	0	0	0	0	0.471	0.471
CACNA1H	ESR1	68415.ENSMMSP00000003432	68415.ENSMMSP00000005779	0	0	0	0	0	0	0.495	0.062	0.506
CACNA1H	GRIK2	68415.ENSMMSP00000003432	68415.ENSMMSP00000014678	0	0	0	0	0	0	0.787	0.044	0.787
CACNA1H	GRIK3	68415.ENSMMSP00000003432	68415.ENSMMSP00000010859	0	0	0	0	0	0	0.787	0.044	0.787
CACNA1H	TRPC4	68415.ENSMMSP00000003432	68415.ENSMMSP00000022619	0	0	0	0	0	0	0.827	0.073	0.832
CAMK1	PDE7B	68415.ENSMMSP00000031981	68415.ENSMMSP00000000149	0	0	0	0	0	0	0.346	0.233	0.476
CAMK1	LGR5	68415.ENSMMSP00000031981	68415.ENSMMSP00000005659	0	0	0	0	0	0	0.491	0.044	0.492
CAMK1	CAMK2B	68415.ENSMMSP00000031981	68415.ENSMMSP00000014580	0	0	0.076	0.85	0.049	0.228	0.507	0.063	0.629
CAMK1	MAPK11	68415.ENSMMSP00000031981	68415.ENSMMSP00000024879	0	0	0.143	0.644	0	0.259	0.138	0.063	0.419
CAMK2B	PDE7B	68415.ENSMMSP00000014580	68415.ENSMMSP00000000149	0	0	0	0	0.061	0.146	0.469	0.212	0.619
CAMK2B	RRAS	68415.ENSMMSP00000014580	68415.ENSMMSP00000003462	0	0	0	0	0	0.059	0.4	0	0.411
CAMK2B	NCALD	68415.ENSMMSP00000014580	68415.ENSMMSP00000003669	0	0	0	0	0.05	0.331	0.234	0.131	0.52
CAMK2B	RIMS3	68415.ENSMMSP00000014580	68415.ENSMMSP00000006500	0	0	0	0	0	0.087	0.536	0.065	0.569
CAMK2B	DIRAS3	68415.ENSMMSP00000014580	68415.ENSMMSP00000007044	0	0	0	0	0.065	0.081	0.422	0	0.459
CAMK2B	GRIA2	68415.ENSMMSP00000014580	68415.ENSMMSP00000007755	0	0	0	0	0.1	0.534	0.835	0.324	0.946
CAMK2B	SLC18A1	68415.ENSMMSP00000014580	68415.ENSMMSP00000008451	0	0	0	0	0	0	0.478	0.079	0.498
CAMK2B	UNC13C	68415.ENSMMSP00000014580	68415.ENSMMSP00000009119	0	0	0	0	0.162	0	0.536	0.055	0.6
CAMK2B	PLCE1	68415.ENSMMSP00000014580	68415.ENSMMSP00000011929	0	0	0	0	0	0	0.403	0.044	0.404
CAMK2B	TNNC1	68415.ENSMMSP00000014580	68415.ENSMMSP00000011988	0	0	0	0	0	0.553	0.363	0.07	0.712
CAMK2B	PLCL1	68415.ENSMMSP00000014580	68415.ENSMMSP00000015305	0	0	0	0	0	0	0.403	0.044	0.404
CAMK2B	RYR3	68415.ENSMMSP00000014580	68415.ENSMMSP00000016635	0	0	0	0	0	0.153	0.497	0.098	0.582
CAMK2B	GRIN3A	68415.ENSMMSP00000014580	68415.ENSMMSP00000019874	0	0	0	0	0.062	0.498	0.48	0.132	0.759
CAMK2B	DLG2	68415.ENSMMSP00000014580	68415.ENSMMSP00000025699	0	0	0	0	0	0.514	0.51	0.334	0.827
CAMTA1	RORB	68415.ENSMMSP00000012277	68415.ENSMMSP00000005458	0	0	0	0	0	0	0	0.498	0.497
CAMTA1	PLCE1	68415.ENSMMSP00000012277	68415.ENSMMSP00000011929	0	0	0	0	0	0	0	0.495	0.495
CAMTA1	SDK2	68415.ENSMMSP00000012277	68415.ENSMMSP00000020480	0	0	0	0	0	0	0	0.457	0.457
CAV1	INSR	68415.ENSMMSP00000013351	68415.ENSMMSP00000002303	0	0	0	0	0	0.237	0.1	0.232	0.426
CAV1	GJB1	68415.ENSMMSP00000013351	68415.ENSMMSP00000003140	0	0	0	0	0	0.087	0	0.462	0.487
CAV1	EDNRB	68415.ENSMMSP00000013351	68415.ENSMMSP00000003719	0	0	0	0	0.088	0.059	0	0.458	0.494
CAV1	ESR1	68415.ENSMMSP00000013351	68415.ENSMMSP00000005779	0	0	0	0	0	0.161	0.645	0.769	0.925
CAV1	SFRP1	68415.ENSMMSP00000013351	68415.ENSMMSP00000007082	0	0	0	0	0	0	0.469	0.072	0.486
CAV1	FZD8	68415.ENSMMSP00000013351	68415.ENSMMSP00000010853	0	0	0	0	0	0	0.954	0.055	0.954
CAV1	FLOT2	68415.ENSMMSP00000013351	68415.ENSMMSP00000011973	0	0	0	0	0	0.242	0.566	0.679	0.885
CAV1	JPH1	68415.ENSMMSP00000013351	68415.ENSMMSP00000012913	0	0	0	0	0.1	0.115	0	0.456	0.528
CAV1	CAV2	68415.ENSMMSP00000013351	68415.ENSMMSP00000013314	0	0	0.101	0.839	0.999	0.55	0.923	0.758	0.999
CAV1	HCN1	68415.ENSMMSP00000013351	68415.ENSMMSP00000028906	0	0	0	0	0	0.116	0	0.374	0.422
CAV1	WNT7B	68415.ENSMMSP00000013351	68415.ENSMMSP00000031359	0	0	0	0	0	0	0.463	0.044	0.464
CAV1	WNT7A	68415.ENSMMSP00000013351	68415.ENSMMSP00000032212	0	0	0	0	0	0	0.463	0.044	0.464
CAV1	FZD2	68415.ENSMMSP00000013351	68415.ENSMMSP00000027373	0	0	0	0	0	0	0.469	0.055	0.476
CAV1	FZD1	68415.ENSMMSP00000013351	68415.ENSMMSP00000027654	0	0	0	0	0	0	0.469	0.069	0.484
CAV1	KDR	68415.ENSMMSP00000013351	68415.ENSMMSP00000028190	0	0	0	0	0	0.113	0	0.51	0.546
CAV1	MATK	68415.ENSMMSP00000013351	68415.ENSMMSP00000030820	0	0	0	0	0	0.167	0.429	0.223	0.598
CAV1	TRPC4	68415.ENSMMSP00000013351	68415.ENSMMSP00000022619	0	0	0	0	0	0.176	0	0.537	0.602
CAV1	PPARG	68415.ENSMMSP00000013351	68415.ENSMMSP00000020067	0	0	0	0	0.069	0.161	0.15	0.479	0.607
CAV1	SGCE	68415.ENSMMSP00000013351	68415.ENSMMSP00000024334	0	0	0	0	0.105	0.169	0.789	0.134	0.845
CAV1	SGCA	68415.ENSMMSP00000013351	68415.ENSMMSP00000033178	0	0	0	0	0.105	0.169	0.789	0.134	0.845
CAV1	SSPN	68415.ENSMMSP00000013351	68415.ENSMMSP00000032206	0	0	0	0	0.163	0	0.829	0.312	0.892
CAV2	ESR1	68415.ENSMMSP00000013314	68415.ENSMMSP00000005779	0	0	0	0	0	0.161	0.645	0.288	0.769
CAV2	FZD9	68415.ENSMMSP00000013314	68415.ENSMMSP00000006835	0	0	0	0	0	0	0.441	0.047	0.444
CAV2	SFRP1	68415.ENSMMSP00000013314	68415.ENSMMSP00000007082	0	0	0	0	0	0	0.441	0.049	0.445
CAV2	FZD8	68415.ENSMMSP00000013314	68415.ENSMMSP00000010853	0	0	0	0	0	0	0.441	0.047	0.444
CAV2	FLOT2	68415.ENSMMSP00000013314	68415.ENSMMSP00000011973	0	0	0	0	0	0.242	0.477	0.59	0.823
CAV2	JPH1	68415.ENSMMSP00000013314	68415.ENSMMSP00000012913	0	0	0	0	0.1	0.064	0	0.463	0.508
CAV2	HCN1	68415.ENSMMSP00000013314	68415.ENSMMSP00000028906	0	0	0	0	0	0.116	0	0.389	0.436
CAV2	FZD1	68415.ENSMMSP00000013314	68415.ENSMMSP00000027654	0	0	0	0	0	0	0.441	0.047	0.444
CAV2	FZD2	68415.ENSMMSP00000013314	68415.ENSMMSP00000027373	0	0	0	0	0	0	0.441	0.047	0.444
CAV2	MATK	68415.ENSMMSP00000013314	68415.ENSMMSP00000030820	0	0	0	0	0	0.167	0.491	0.195	0.628
CAV2	SGCE	68415.ENSMMSP00000013314	68415.ENSMMSP00000024334	0	0	0	0	0.067	0.16	0.763	0.131	0.816
CAV2	SGCA	68415.ENSMMSP00000013314	68415.ENSMMSP00000033178	0	0	0	0	0.067	0.16	0.763	0.131	0.816
CAV2	SSPN	68415.ENSMMSP00000013314	68415.ENSMMSP00000032206	0	0	0	0	0.163	0	0.796	0.212	0.853
CBX7	CD109	68415.ENSMMSP00000021001	68415.ENSMMSP00000001520	0	0	0	0	0	0.455	0.655	0.099	0.815
CBX7	SCML4	68415.ENSMMSP00000021001	68415.ENSMMSP00000012291	0	0	0	0	0	0.246	0.464	0.184	0.641
CBX7	CPAMD8	68415.ENSMMSP00000021001	68415.ENSMMSP00000020348	0	0	0	0	0	0.455	0.655	0.099	0.815
CBX7	JARID2	68415.ENSMMSP00000021001	68415.ENSMMSP00000022587	0	0	0	0	0	0.117	0.835	0.322	0.892
CCBE1	FOXC2	68415.ENSMMSP00000003634	68415.ENSMMSP00000012422	0	0	0	0	0	0	0.062	0.567	0.576
CCBE1	DAB2	68415.ENSMMSP00000003634	68415.ENSMMSP00000026569	0	0	0	0	0.069	0.207	0.462	0.067	0.579
CCDC177	DGKI	68415.ENSMMSP00000020502	68415.ENSMMSP00000004826	0	0	0	0	0	0	0	0.457	0.457
CCDC177	TNC	68415.ENSMMSP00000020502	68415.ENSMMSP00000019252	0	0	0	0	0	0.442	0.306	0	0.596
CCND3	ESR1	68415.ENSMMSP00000012963	68415.ENSMMSP00000005779	0	0	0	0	0	0.235	0.227	0.262	0.525
CCND3	CRACR2A	68415.ENSMMSP00000012963	68415.ENSMMSP00000023043	0	0	0	0	0	0	0.382	0.237	0.508
CCND3	MATK	68415.ENSMMSP00000012963	68415.ENSMMSP00000030820	0	0	0	0	0	0.062	0.465	0.132	0.526
CCND3	MAPK11	68415.ENSMMSP00000012963	68415.ENSMMSP00000024879	0	0	0	0	0.043	0.079	0.478	0.094	0.527
CD109	MMP11	68415.ENSMMSP00000001520	68415.ENSMMSP00000025436	0	0	0	0	0	0.087	0.4	0	0.428
CD109	SCML4	68415.ENSMMSP00000001520	68415.ENSMMSP00000012291	0	0	0	0	0	0.246	0.286	0	0.438
CD109	KLKB1	68415.ENSMMSP00000001520	68415.ENSMMSP00000027169	0	0	0	0	0	0.236	0.132	0.292	0.489
CD109	DAB2	68415.ENSMMSP00000001520	68415.ENSMMSP00000026569	0	0	0	0	0	0.24	0.37	0.071	0.516
CD109	ITGA5	68415.ENSMMSP00000001520	68415.ENSMMSP00000011129	0	0	0	0	0	0.159	0.455	0.076	0.539
CD19	IRF4	68415.ENSMMSP00000010866	68415.ENSMMSP00000002712	0	0	0	0	0.076	0	0	0.625	0.638
CD19	ITGA2	68415.ENSMMSP00000010866	68415.ENSMMSP00000005730	0	0	0	0	0.045	0	0	0.599	0.6
CD19	TSPAN1	68415.ENSMMSP00000010866	68415.ENSMMSP00000005810	0	0	0	0	0.077	0.237	0.478	0.136	0.639
CD19	CSF1	68415.ENSMMSP00000010866	68415.ENSMMSP00000006020	0	0	0	0	0	0	0	0.552	0.552
CD19	TCL1A	68415.ENSMMSP00000010866	68415.ENSMMSP00000009437	0	0	0	0	0.798	0	0	0.29	0.85
CD19	TLR3	68415.ENSMMSP00000010866	68415.ENSMMSP00000026954	0	0	0	0	0.043	0	0	0.525	0.525
CD19	TLR2	68415.ENSMMSP00000010866	68415.ENSMMSP00000011847	0	0	0	0	0.076	0	0	0.524	0.541
CD19	MATK	68415.ENSMMSP00000010866	68415.ENSMMSP00000030820	0	0	0	0	0.101	0.082	0.491	0.138	0.589
CD19	PDGFA	68415.ENSMMSP00000010866	68415.ENSMMSP00000014152	0	0	0	0	0	0.237	0.478	0.084	0.603
CD19	TSPAN10	68415.ENSMMSP00000010866	68415.ENSMMSP00000031770	0	0	0	0	0	0.237	0.478	0.322	0.706
CD19	CXCR4	68415.ENSMMSP00000010866	68415.ENSMMSP00000027407	0	0	0	0	0.1	0	0	0.736	0.752
CD19	THY1	68415.ENSMMSP00000010866	68415.ENSMMSP00000020140	0	0	0	0	0	0	0	0.758	0.758
CD19	CD5	68415.ENSMMSP00000010866	68415.ENSMMSP00000025456	0	0	0	0	0.076	0	0	0.766	0.774
CD19	IL7	68415.ENSMMSP00000010866	68415.ENSMMSP00000011997	0	0	0.333	0	0.069	0	0	0.769	0.844
CD3G	DHRS12	68415.ENSMMSP00000024600	68415.ENSMMSP00000020176	0	0	0	0	0.102	0.224	0.361	0	0.515
CD3G	KLRF1	68415.ENSMMSP00000024600	68415.ENSMMSP00000031363	0	0	0	0	0.126	0	0	0.465	0.512
CD3G	MATK	68415.ENSMMSP00000024600	68415.ENSMMSP00000030820	0	0	0	0	0.066	0.165	0.549	0.056	0.623
CD3G	DAB2	68415.ENSMMSP00000024600	68415.ENSMMSP00000026569	0	0	0	0	0.069	0	0.645	0	0.655
CD3G	CD5	68415.ENSMMSP00000024600	68415.ENSMMSP00000025456	0	0	0	0	0.644	0	0	0.326	0.749
CD5	IRF4	68415.ENSMMSP00000025456	68415.ENSMMSP00000002712	0	0	0	0	0.095	0	0	0.476	0.505
CD5	IL7	68415.ENSMMSP00000025456	68415.ENSMMSP00000011997	0	0	0	0	0.1	0	0	0.735	0.751
CD5	SDK2	68415.ENSMMSP00000025456	68415.ENSMMSP00000020480	0	0	0	0	0	0.555	0	0.086	0.575
CD5	CXCR4	68415.ENSMMSP00000025456	68415.ENSMMSP00000027407	0	0	0	0	0	0	0	0.502	0.502
CD5	KIRREL1	68415.ENSMMSP00000025456	68415.ENSMMSP00000026004	0	0	0	0	0	0.555	0	0.086	0.575
CDC42EP5	DHRS12	68415.ENSMMSP00000000607	68415.ENSMMSP00000020176	0	0	0	0	0	0	0	0.472	0.472
CDC42EP5	MLANA	68415.ENSMMSP00000000607	68415.ENSMMSP00000002116	0	0	0	0	0	0	0	0.49	0.489
CDC42EP5	KLRG2	68415.ENSMMSP00000000607	68415.ENSMMSP00000002713	0	0	0	0	0	0	0	0.517	0.517
CDH13	CDH17	68415.ENSMMSP00000010325	68415.ENSMMSP00000001301	0	0	0	0.721	0	0	0.863	0.065	0.866
CDH13	CNIH3	68415.ENSMMSP00000010325	68415.ENSMMSP00000026672	0	0	0	0	0	0	0	0.531	0.531
CDH13	CTNND2	68415.ENSMMSP00000010325	68415.ENSMMSP00000029685	0	0	0	0	0	0.243	0.611	0.219	0.749
CDH13	CDH4	68415.ENSMMSP00000010325	68415.ENSMMSP00000025887	0	0	0	0.879	0	0	0.797	0.056	0.8
CDH17	CTNND2	68415.ENSMMSP00000001301	68415.ENSMMSP00000029685	0	0	0	0	0	0.243	0.541	0.327	0.745
CDH17	CDH4	68415.ENSMMSP00000001301	68415.ENSMMSP00000025887	0	0	0	0.689	0.119	0	0.794	0.054	0.813
CDH4	FGFR1	68415.ENSMMSP00000025887	68415.ENSMMSP00000005538	0	0	0	0	0.066	0.188	0	0.29	0.414
CDH4	ESR1	68415.ENSMMSP00000025887	68415.ENSMMSP00000005779	0	0	0	0	0	0	0	0.451	0.451
CDH4	FGF13	68415.ENSMMSP00000025887	68415.ENSMMSP00000008640	0	0	0	0	0	0	0	0.468	0.468
CDH4	SDK2	68415.ENSMMSP00000025887	68415.ENSMMSP00000020480	0	0	0	0	0	0.085	0.056	0.456	0.489
CDH4	MAPK11	68415.ENSMMSP00000025887	68415.ENSMMSP00000024879	0	0	0	0	0	0.123	0.607	0.053	0.645
CDH4	CTNND2	68415.ENSMMSP00000025887	68415.ENSMMSP00000029685	0	0	0	0	0	0.67	0.631	0.129	0.884
CHRNA10	KCNQ4	68415.ENSMMSP00000022276	68415.ENSMMSP00000006314	0	0	0	0	0	0	0	0.518	0.518
CHRNA10	VWC2	68415.ENSMMSP00000022276	68415.ENSMMSP00000029096	0	0	0	0	0.046	0	0.525	0	0.527
CHSY3	REM1	68415.ENSMMSP00000004571	68415.ENSMMSP00000021019	0	0	0	0	0.051	0	0	0.457	0.462
CLIP4	NFATC4	68415.ENSMMSP00000012189	68415.ENSMMSP00000008469	0	0	0	0	0	0.164	0.565	0.044	0.621
CLIP4	UNC5C	68415.ENSMMSP00000012189	68415.ENSMMSP00000026803	0	0	0	0	0	0	0	0.515	0.515
CLMN	PALLD	68415.ENSMMSP00000009715	68415.ENSMMSP00000029610	0	0	0	0	0	0.089	0	0.473	0.499
CLMN	CTF1	68415.ENSMMSP00000009715	68415.ENSMMSP00000019414	0	0	0	0	0	0.183	0.488	0.069	0.576
CNIH3	GRIA2	68415.ENSMMSP00000026672	68415.ENSMMSP00000007755	0	0	0	0	0	0.905	0.781	0.234	0.982
CNIH3	GRIK2	68415.ENSMMSP00000026672	68415.ENSMMSP00000014678	0	0	0	0	0	0	0.592	0.133	0.631
CNIH3	MEIS2	68415.ENSMMSP00000026672	68415.ENSMMSP00000017618	0	0	0	0	0	0	0	0.457	0.457
CNIH3	TMEM121	68415.ENSMMSP00000026672	68415.ENSMMSP00000025724	0	0	0	0	0	0	0	0.434	0.434
CNIH3	VWC2	68415.ENSMMSP00000026672	68415.ENSMMSP00000029096	0	0	0	0	0	0	0.557	0.185	0.623
CNNM1	RFLNA	68415.ENSMMSP00000026214	68415.ENSMMSP00000013904	0	0	0	0	0	0	0	0.457	0.457
CNTN1	SGCE	68415.ENSMMSP00000006120	68415.ENSMMSP00000024334	0	0	0	0	0	0	0	0.456	0.456
CNTN1	CTNND2	68415.ENSMMSP00000006120	68415.ENSMMSP00000029685	0	0	0	0	0.063	0	0	0.46	0.472
COL11A2	COL4A2	68415.ENSMMSP00000030895	68415.ENSMMSP00000000196	0	0	0	0.647	0.096	0.139	0.468	0.194	0.621
COL11A2	ITGA2	68415.ENSMMSP00000030895	68415.ENSMMSP00000005730	0	0	0	0	0	0.084	0.374	0.139	0.463
COL11A2	THBS2	68415.ENSMMSP00000030895	68415.ENSMMSP00000005967	0	0	0	0	0.092	0.18	0.077	0.234	0.403
COL11A2	P3H2	68415.ENSMMSP00000030895	68415.ENSMMSP00000007221	0	0	0	0	0	0	0.607	0.042	0.607
COL11A2	PCOLCE2	68415.ENSMMSP00000030895	68415.ENSMMSP00000007721	0	0	0	0	0.048	0.6	0.229	0.055	0.685
COL11A2	ITGA5	68415.ENSMMSP00000030895	68415.ENSMMSP00000011129	0	0	0	0	0	0.066	0.491	0.117	0.543
COL11A2	TNC	68415.ENSMMSP00000030895	68415.ENSMMSP00000019252	0	0	0	0	0	0.116	0.61	0	0.64
COL11A2	COL5A1	68415.ENSMMSP00000030895	68415.ENSMMSP00000024242	0	0	0.056	0.969	0	0	0.499	0	0.506
COL11A2	COL17A1	68415.ENSMMSP00000030895	68415.ENSMMSP00000030799	0	0	0	0.58	0	0	0.468	0.111	0.506
COL17A1	COL4A2	68415.ENSMMSP00000030799	68415.ENSMMSP00000000196	0	0	0	0.561	0	0	0.478	0.168	0.547
COL17A1	PDIA2	68415.ENSMMSP00000030799	68415.ENSMMSP00000006558	0	0	0	0	0	0.071	0.636	0	0.647
COL17A1	P3H2	68415.ENSMMSP00000030799	68415.ENSMMSP00000007221	0	0	0	0	0	0	0.645	0.106	0.669
COL17A1	LAMA3	68415.ENSMMSP00000030799	68415.ENSMMSP00000016806	0	0	0	0	0.052	0.112	0.478	0.604	0.802
COL17A1	TNC	68415.ENSMMSP00000030799	68415.ENSMMSP00000019252	0	0	0	0	0	0	0.61	0.086	0.628
COL17A1	COL5A1	68415.ENSMMSP00000030799	68415.ENSMMSP00000024242	0	0	0.105	0.595	0	0	0.468	0.109	0.539
COL17A1	DST	68415.ENSMMSP00000030799	68415.ENSMMSP00000026564	0	0	0	0	0	0.228	0.561	0.328	0.752
COL4A2	SDK2	68415.ENSMMSP00000000196	68415.ENSMMSP00000020480	0	0	0	0	0	0.147	0.056	0.326	0.409
COL4A2	ENOX1	68415.ENSMMSP00000000196	68415.ENSMMSP00000027440	0	0	0	0	0	0	0	0.461	0.461
COL4A2	THBS2	68415.ENSMMSP00000000196	68415.ENSMMSP00000005967	0	0	0	0	0.054	0.18	0.229	0.211	0.464
COL4A2	PCOLCE2	68415.ENSMMSP00000000196	68415.ENSMMSP00000007721	0	0	0	0	0	0.325	0.064	0.226	0.468
COL4A2	NID1	68415.ENSMMSP00000000196	68415.ENSMMSP00000017572	0	0	0	0	0.092	0.179	0.055	0.458	0.567
COL4A2	TGFBI	68415.ENSMMSP00000000196	68415.ENSMMSP00000007461	0	0	0	0	0	0.07	0	0.601	0.613
COL4A2	P3H2	68415.ENSMMSP00000000196	68415.ENSMMSP00000007221	0	0	0	0	0	0.058	0.607	0	0.613
COL4A2	TNC	68415.ENSMMSP00000000196	68415.ENSMMSP00000019252	0	0	0	0	0.058	0.063	0.61	0.054	0.63
COL4A2	COL5A1	68415.ENSMMSP00000000196	68415.ENSMMSP00000024242	0	0	0	0.655	0.214	0.139	0.468	0.465	0.781
COL4A2	ITGA2	68415.ENSMMSP00000000196	68415.ENSMMSP00000005730	0	0	0	0	0	0	0.847	0.209	0.873
COL4A2	ITGA5	68415.ENSMMSP00000000196	68415.ENSMMSP00000011129	0	0	0	0	0	0.066	0.847	0.262	0.885
COL4A2	LAMA3	68415.ENSMMSP00000000196	68415.ENSMMSP00000016806	0	0	0	0	0	0.112	0.779	0.602	0.915
COL5A1	ITGA2	68415.ENSMMSP00000024242	68415.ENSMMSP00000005730	0	0	0	0	0	0.084	0.374	0.23	0.519
COL5A1	THBS2	68415.ENSMMSP00000024242	68415.ENSMMSP00000005967	0	0	0	0	0.092	0.18	0.077	0.507	0.615
COL5A1	P3H2	68415.ENSMMSP00000024242	68415.ENSMMSP00000007221	0	0	0	0	0	0	0.607	0.042	0.607
COL5A1	PCOLCE2	68415.ENSMMSP00000024242	68415.ENSMMSP00000007721	0	0	0	0	0.048	0.6	0.229	0.069	0.69
COL5A1	ITGA5	68415.ENSMMSP00000024242	68415.ENSMMSP00000011129	0	0	0	0	0	0.066	0.491	0.291	0.633
COL5A1	LAMA3	68415.ENSMMSP00000024242	68415.ENSMMSP00000016806	0	0	0	0	0	0.116	0.056	0.489	0.536
COL5A1	TNC	68415.ENSMMSP00000024242	68415.ENSMMSP00000019252	0	0	0	0	0	0.116	0.61	0	0.64
COL5A1	LTBP2	68415.ENSMMSP00000024242	68415.ENSMMSP00000028848	0	0	0	0	0	0.18	0.062	0.287	0.403
COL5A1	FBLN2	68415.ENSMMSP00000024242	68415.ENSMMSP00000032185	0	0	0	0	0.067	0.18	0.062	0.323	0.449
COPB2	GEM	68415.ENSMMSP00000009848	68415.ENSMMSP00000001346	0	0	0	0	0	0.181	0.45	0.067	0.543
COPB2	RRAS	68415.ENSMMSP00000009848	68415.ENSMMSP00000003462	0	0	0	0	0	0.181	0.45	0.067	0.543
COPB2	DIRAS3	68415.ENSMMSP00000009848	68415.ENSMMSP00000007044	0	0	0	0	0	0.181	0.45	0.067	0.543
COPB2	RASL12	68415.ENSMMSP00000009848	68415.ENSMMSP00000025687	0	0	0	0	0	0.181	0.45	0.067	0.543
COPB2	REM1	68415.ENSMMSP00000009848	68415.ENSMMSP00000021019	0	0	0	0	0	0.181	0.45	0.067	0.543
COPB2	FIGNL2	68415.ENSMMSP00000009848	68415.ENSMMSP00000027035	0	0	0	0	0	0.239	0.569	0.085	0.673
CPAMD8	ITGA5	68415.ENSMMSP00000020348	68415.ENSMMSP00000011129	0	0	0	0	0	0.159	0.455	0	0.522
CPAMD8	SCML4	68415.ENSMMSP00000020348	68415.ENSMMSP00000012291	0	0	0	0	0	0.246	0.286	0	0.438
CPAMD8	MMP11	68415.ENSMMSP00000020348	68415.ENSMMSP00000025436	0	0	0	0	0	0.087	0.4	0	0.428
CPAMD8	DAB2	68415.ENSMMSP00000020348	68415.ENSMMSP00000026569	0	0	0	0	0	0.24	0.37	0.071	0.516
CRACR2A	RYR3	68415.ENSMMSP00000023043	68415.ENSMMSP00000016635	0	0	0	0	0	0	0	0.457	0.457
CRIM1	GSDME	68415.ENSMMSP00000020589	68415.ENSMMSP00000009919	0	0	0	0	0	0	0.058	0.448	0.457
CRIM1	HOXA1	68415.ENSMMSP00000020589	68415.ENSMMSP00000011097	0	0	0	0	0	0	0	0.537	0.537
CRIM1	GALNT18	68415.ENSMMSP00000020589	68415.ENSMMSP00000013816	0	0	0	0	0	0	0.073	0.598	0.611
CRIM1	MATK	68415.ENSMMSP00000020589	68415.ENSMMSP00000030820	0	0	0	0	0	0.138	0.423	0.043	0.482
CRIM1	RBMS3	68415.ENSMMSP00000020589	68415.ENSMMSP00000029362	0	0	0	0	0	0	0	0.493	0.493
CRISPLD1	JPH1	68415.ENSMMSP00000012784	68415.ENSMMSP00000012913	0	0	0	0	0	0	0	0.467	0.467
CRISPLD1	LOXL2	68415.ENSMMSP00000012784	68415.ENSMMSP00000017174	0	0	0	0	0	0	0	0.477	0.477
CSF1	INSR	68415.ENSMMSP00000006020	68415.ENSMMSP00000002303	0	0	0	0	0	0.043	0.852	0.068	0.856
CSF1	IRF4	68415.ENSMMSP00000006020	68415.ENSMMSP00000002712	0	0	0	0	0.063	0	0.267	0.323	0.494
CSF1	FGFR1	68415.ENSMMSP00000006020	68415.ENSMMSP00000005538	0	0	0	0	0.09	0.525	0.847	0.079	0.93
CSF1	PLXNC1	68415.ENSMMSP00000006020	68415.ENSMMSP00000013362	0	0	0	0	0	0	0.49	0.046	0.492
CSF1	TLR3	68415.ENSMMSP00000006020	68415.ENSMMSP00000026954	0	0	0	0	0.045	0	0	0.501	0.503
CSF1	EPHA7	68415.ENSMMSP00000006020	68415.ENSMMSP00000017465	0	0	0	0	0.067	0.043	0.491	0	0.505
CSF1	THY1	68415.ENSMMSP00000006020	68415.ENSMMSP00000020140	0	0	0	0	0	0	0	0.536	0.536
CSF1	PPARG	68415.ENSMMSP00000006020	68415.ENSMMSP00000020067	0	0	0	0	0.067	0	0	0.534	0.546
CSF1	IL7	68415.ENSMMSP00000006020	68415.ENSMMSP00000011997	0	0	0	0	0	0	0	0.602	0.602
CSF1	TLR2	68415.ENSMMSP00000006020	68415.ENSMMSP00000011847	0	0	0	0	0.06	0	0	0.6	0.607
CSF1	CXCR4	68415.ENSMMSP00000006020	68415.ENSMMSP00000027407	0	0	0	0	0.082	0	0	0.598	0.615
CSF1	NFATC1	68415.ENSMMSP00000006020	68415.ENSMMSP00000009619	0	0	0	0	0	0	0	0.633	0.633
CSF1	NTRK2	68415.ENSMMSP00000006020	68415.ENSMMSP00000015633	0	0	0	0	0	0.043	0.863	0.186	0.883
CSF1	KDR	68415.ENSMMSP00000006020	68415.ENSMMSP00000028190	0	0	0	0	0	0.525	0.863	0.129	0.938
CSF1	PDGFRA	68415.ENSMMSP00000006020	68415.ENSMMSP00000028382	0	0	0	0	0	0.525	0.863	0.483	0.963
CSMD2	TNC	68415.ENSMMSP00000015490	68415.ENSMMSP00000019252	0	0	0	0	0	0.442	0.306	0	0.596
CTF1	KDR	68415.ENSMMSP00000019414	68415.ENSMMSP00000028190	0	0	0	0	0	0	0.515	0.059	0.524
CTF1	GAS2	68415.ENSMMSP00000019414	68415.ENSMMSP00000030936	0	0	0	0	0	0.183	0.488	0.069	0.576
CTF1	DST	68415.ENSMMSP00000019414	68415.ENSMMSP00000026564	0	0	0	0	0	0.183	0.488	0.069	0.576
CTF1	PDGFRA	68415.ENSMMSP00000019414	68415.ENSMMSP00000028382	0	0	0	0	0	0	0.847	0.082	0.853
CTNND2	PCDHA3	68415.ENSMMSP00000029685	68415.ENSMMSP00000000929	0	0	0	0	0	0.243	0.179	0.195	0.456
CTNND2	PTPRD	68415.ENSMMSP00000029685	68415.ENSMMSP00000001452	0	0	0	0	0.048	0.084	0.423	0.043	0.454
CTNND2	DST	68415.ENSMMSP00000029685	68415.ENSMMSP00000026564	0	0	0	0	0	0.16	0.529	0.107	0.615
CTNND2	MATK	68415.ENSMMSP00000029685	68415.ENSMMSP00000030820	0	0	0	0	0	0.166	0.357	0.211	0.539
CUX2	RORB	68415.ENSMMSP00000029062	68415.ENSMMSP00000005458	0	0	0	0	0	0	0	0.522	0.522
CUX2	FOXP2	68415.ENSMMSP00000029062	68415.ENSMMSP00000012652	0	0	0	0	0	0.085	0	0.407	0.434
CUX2	SLC24A5	68415.ENSMMSP00000029062	68415.ENSMMSP00000015476	0	0	0	0	0	0.524	0	0	0.524
CUX2	NEURL1B	68415.ENSMMSP00000029062	68415.ENSMMSP00000022141	0	0	0	0	0	0	0	0.425	0.424
CUX2	LHX2	68415.ENSMMSP00000029062	68415.ENSMMSP00000023108	0	0	0	0	0	0.103	0	0.457	0.492
CUX2	FAM107A	68415.ENSMMSP00000029062	68415.ENSMMSP00000023957	0	0	0	0	0	0	0	0.485	0.485
CXCL14	CXCR4	68415.ENSMMSP00000007974	68415.ENSMMSP00000027407	0	0	0	0	0	0.163	0.847	0.603	0.944
CXCR4	IRF4	68415.ENSMMSP00000027407	68415.ENSMMSP00000002712	0	0	0	0	0.065	0	0	0.599	0.609
CXCR4	ESR1	68415.ENSMMSP00000027407	68415.ENSMMSP00000005779	0	0	0	0	0	0	0	0.457	0.457
CXCR4	TLR2	68415.ENSMMSP00000027407	68415.ENSMMSP00000011847	0	0	0	0	0.178	0.229	0	0.534	0.678
CXCR4	IL7	68415.ENSMMSP00000027407	68415.ENSMMSP00000011997	0	0	0	0	0.067	0	0	0.476	0.49
CXCR4	THY1	68415.ENSMMSP00000027407	68415.ENSMMSP00000020140	0	0	0	0	0	0	0	0.481	0.481
CXCR4	S1PR1	68415.ENSMMSP00000027407	68415.ENSMMSP00000021304	0	0	0	0	0.075	0.166	0	0.525	0.601
CXCR4	SLIT2	68415.ENSMMSP00000027407	68415.ENSMMSP00000021936	0	0	0	0	0	0	0.478	0.312	0.625
CXCR4	PDGFRA	68415.ENSMMSP00000027407	68415.ENSMMSP00000028382	0	0	0	0	0	0	0	0.493	0.493
CXCR4	KDR	68415.ENSMMSP00000027407	68415.ENSMMSP00000028190	0	0	0	0	0	0	0	0.536	0.536
CYP4X1	SBSPON	68415.ENSMMSP00000019312	68415.ENSMMSP00000013956	0	0	0	0	0	0.238	0.403	0.072	0.54
CYP4X1	DHRS12	68415.ENSMMSP00000019312	68415.ENSMMSP00000020176	0	0	0	0	0.075	0	0.402	0.067	0.438
DAB2	FZD9	68415.ENSMMSP00000026569	68415.ENSMMSP00000006835	0	0	0	0	0	0	0.537	0.12	0.575
DAB2	SCARF2	68415.ENSMMSP00000026569	68415.ENSMMSP00000011652	0	0	0	0	0.062	0.207	0.462	0.067	0.576
DAB2	TF	68415.ENSMMSP00000026569	68415.ENSMMSP00000016134	0	0	0	0	0.045	0	0.599	0.086	0.619
DAB2	PDGFRA	68415.ENSMMSP00000026569	68415.ENSMMSP00000028382	0	0	0	0	0.116	0.11	0	0.323	0.42
DCT	MLANA	68415.ENSMMSP00000004699	68415.ENSMMSP00000002116	0	0	0	0	0.767	0	0	0.663	0.918
DCT	EDNRB	68415.ENSMMSP00000004699	68415.ENSMMSP00000003719	0	0	0	0	0	0	0	0.596	0.596
DCT	TNC	68415.ENSMMSP00000004699	68415.ENSMMSP00000019252	0	0	0	0	0	0.13	0.348	0.043	0.409
DCT	SLC24A5	68415.ENSMMSP00000004699	68415.ENSMMSP00000015476	0	0	0	0	0.075	0	0	0.602	0.616
DCT	PAX3	68415.ENSMMSP00000004699	68415.ENSMMSP00000028582	0	0	0	0	0	0.078	0	0.602	0.617
DCT	OCA2	68415.ENSMMSP00000004699	68415.ENSMMSP00000016102	0	0	0	0	0.104	0	0	0.596	0.622
DCT	MC1R	68415.ENSMMSP00000004699	68415.ENSMMSP00000008400	0	0	0	0	0	0	0	0.651	0.651
DCT	SOX10	68415.ENSMMSP00000004699	68415.ENSMMSP00000022862	0	0	0	0	0.062	0.069	0	0.755	0.767
DCT	SLC45A2	68415.ENSMMSP00000004699	68415.ENSMMSP00000020550	0	0	0	0	0.214	0	0	0.739	0.786
DCT	TYR	68415.ENSMMSP00000004699	68415.ENSMMSP00000012485	0	0	0.079	0.896	0.791	0	0.518	0.341	0.93
DDAH2	GRIA2	68415.ENSMMSP00000021844	68415.ENSMMSP00000007755	0	0	0	0	0	0	0	0.621	0.621
DDAH2	GAD1	68415.ENSMMSP00000021844	68415.ENSMMSP00000020870	0	0	0	0	0	0	0.516	0.099	0.545
DDAH2	SLC1A6	68415.ENSMMSP00000021844	68415.ENSMMSP00000027197	0	0	0	0	0	0	0	0.472	0.472
DGKI	GRIK3	68415.ENSMMSP00000004826	68415.ENSMMSP00000010859	0	0	0	0	0	0	0	0.451	0.451
DGKI	DIRAS3	68415.ENSMMSP00000004826	68415.ENSMMSP00000007044	0	0	0	0	0.045	0.076	0.597	0	0.613
DGKI	PLCL1	68415.ENSMMSP00000004826	68415.ENSMMSP00000015305	0	0	0	0	0.1	0.171	0.541	0.168	0.676
DGKI	RASGRP4	68415.ENSMMSP00000004826	68415.ENSMMSP00000004883	0	0	0	0	0	0.089	0.679	0.087	0.709
DGKI	PLCE1	68415.ENSMMSP00000004826	68415.ENSMMSP00000011929	0	0	0	0	0.076	0.171	0.863	0.498	0.94
DHRS12	KIAA1324L	68415.ENSMMSP00000020176	68415.ENSMMSP00000002429	0	0	0	0	0	0.179	0	0.491	0.564
DHRS12	DNER	68415.ENSMMSP00000020176	68415.ENSMMSP00000010662	0	0	0	0	0	0.179	0	0.38	0.469
DHRS12	SBSPON	68415.ENSMMSP00000020176	68415.ENSMMSP00000013956	0.043	0	0	0	0	0.088	0.412	0.062	0.454
DHRS12	HMGCLL1	68415.ENSMMSP00000020176	68415.ENSMMSP00000027637	0	0	0	0	0.065	0	0.456	0.087	0.495
DHRS12	RGR	68415.ENSMMSP00000020176	68415.ENSMMSP00000028154	0	0	0	0	0.042	0.117	0	0.458	0.501
DIRAS3	ZDHHC14	68415.ENSMMSP00000007044	68415.ENSMMSP00000001290	0	0	0	0	0	0.146	0.457	0.074	0.533
DIRAS3	INSR	68415.ENSMMSP00000007044	68415.ENSMMSP00000002303	0	0	0	0	0.063	0.184	0.335	0.058	0.456
DIRAS3	RASGRP4	68415.ENSMMSP00000007044	68415.ENSMMSP00000004883	0	0	0	0	0	0.616	0.482	0.067	0.798
DIRAS3	PALLD	68415.ENSMMSP00000007044	68415.ENSMMSP00000029610	0	0	0	0	0	0.158	0.064	0.3	0.4
DIRAS3	MAPK11	68415.ENSMMSP00000007044	68415.ENSMMSP00000024879	0	0	0	0	0	0.178	0.293	0.082	0.419
DIRAS3	SHANK2	68415.ENSMMSP00000007044	68415.ENSMMSP00000030491	0	0	0	0	0	0.415	0.045	0.049	0.422
DIRAS3	RAB6B	68415.ENSMMSP00000007044	68415.ENSMMSP00000016046	0	0	0.108	0.726	0	0.236	0.207	0.061	0.425
DIRAS3	PLCL1	68415.ENSMMSP00000007044	68415.ENSMMSP00000015305	0	0	0	0	0	0.249	0.289	0	0.443
DIRAS3	PLCE1	68415.ENSMMSP00000007044	68415.ENSMMSP00000011929	0	0	0	0	0	0.249	0.289	0.131	0.495
DIRAS3	SHC3	68415.ENSMMSP00000007044	68415.ENSMMSP00000018413	0	0	0	0	0.06	0	0.491	0.062	0.512
DIRAS3	SLC38A4	68415.ENSMMSP00000007044	68415.ENSMMSP00000009532	0	0	0	0	0	0	0.17	0.457	0.53
DIRAS3	NTRK2	68415.ENSMMSP00000007044	68415.ENSMMSP00000015633	0	0	0	0	0.063	0.184	0.457	0	0.548
DIRAS3	MATK	68415.ENSMMSP00000007044	68415.ENSMMSP00000030820	0	0	0	0	0.063	0.187	0.469	0.052	0.565
DIRAS3	RASAL3	68415.ENSMMSP00000007044	68415.ENSMMSP00000028157	0	0	0	0	0	0.242	0.456	0.113	0.602
DIRAS3	PEG10	68415.ENSMMSP00000007044	68415.ENSMMSP00000023514	0	0	0	0	0	0.127	0.057	0.564	0.609
DIRAS3	SGCE	68415.ENSMMSP00000007044	68415.ENSMMSP00000024334	0	0	0	0	0	0	0	0.726	0.726
DLG2	KCNS3	68415.ENSMMSP00000025699	68415.ENSMMSP00000003196	0	0	0	0	0	0.187	0	0.333	0.434
DLG2	NCALD	68415.ENSMMSP00000025699	68415.ENSMMSP00000003669	0	0	0	0	0	0.194	0.665	0	0.718
DLG2	KCNA7	68415.ENSMMSP00000025699	68415.ENSMMSP00000004932	0	0	0	0	0	0.616	0	0.053	0.62
DLG2	GRIA2	68415.ENSMMSP00000025699	68415.ENSMMSP00000007755	0	0	0	0	0.059	0.485	0.711	0.203	0.873
DLG2	TENM1	68415.ENSMMSP00000025699	68415.ENSMMSP00000008849	0	0	0	0	0	0	0	0.517	0.517
DLG2	GRIK3	68415.ENSMMSP00000025699	68415.ENSMMSP00000010859	0	0	0	0	0	0.237	0.611	0.128	0.718
DLG2	GRIK2	68415.ENSMMSP00000025699	68415.ENSMMSP00000014678	0	0	0	0	0	0.237	0.611	0.104	0.71
DLG2	MAP1B	68415.ENSMMSP00000025699	68415.ENSMMSP00000019503	0	0	0	0	0	0.595	0	0.149	0.64
DLG2	GRIN3A	68415.ENSMMSP00000025699	68415.ENSMMSP00000019874	0	0	0	0	0	0.246	0.783	0.208	0.859
DLG2	KCNA6	68415.ENSMMSP00000025699	68415.ENSMMSP00000024128	0	0	0	0	0	0.616	0	0.053	0.62
DLG2	MAPK11	68415.ENSMMSP00000025699	68415.ENSMMSP00000024879	0	0	0	0	0	0.182	0.636	0	0.689
DLG2	TNS2	68415.ENSMMSP00000025699	68415.ENSMMSP00000030050	0	0	0	0	0	0.172	0.328	0	0.419
DLG2	FAM78B	68415.ENSMMSP00000025699	68415.ENSMMSP00000026839	0	0	0	0	0	0.238	0.463	0	0.573
DLG2	SHANK2	68415.ENSMMSP00000025699	68415.ENSMMSP00000030491	0	0	0	0	0	0.222	0.583	0.385	0.783
DMRT3	PPP1R3C	68415.ENSMMSP00000003601	68415.ENSMMSP00000015262	0	0	0	0	0	0.178	0.316	0	0.413
DMRT3	HOXA2	68415.ENSMMSP00000003601	68415.ENSMMSP00000011132	0	0	0	0	0	0.064	0	0.459	0.471
DNER	TNC	68415.ENSMMSP00000010662	68415.ENSMMSP00000019252	0	0	0	0.558	0	0.13	0.348	0.043	0.409
DNER	GAD1	68415.ENSMMSP00000010662	68415.ENSMMSP00000020870	0	0	0	0	0.186	0.043	0	0.457	0.54
DOK7	NTRK2	68415.ENSMMSP00000024973	68415.ENSMMSP00000015633	0	0	0	0	0	0.569	0.079	0.049	0.589
DOK7	LAMB2	68415.ENSMMSP00000024973	68415.ENSMMSP00000020179	0	0	0	0	0	0	0	0.493	0.493
DPYD	PTCHD1	68415.ENSMMSP00000023697	68415.ENSMMSP00000008091	0	0	0	0	0	0	0	0.483	0.483
DPYD	GPC2	68415.ENSMMSP00000023697	68415.ENSMMSP00000017250	0	0	0	0	0.051	0	0.487	0.126	0.537
DPYD	GPR143	68415.ENSMMSP00000023697	68415.ENSMMSP00000021481	0.145	0	0	0	0.824	0.093	0.739	0.282	0.969
DST	ITGA5	68415.ENSMMSP00000026564	68415.ENSMMSP00000011129	0	0	0	0	0	0	0.478	0.058	0.487
DST	SPTB	68415.ENSMMSP00000026564	68415.ENSMMSP00000017894	0	0	0	0.569	0.066	0.11	0.478	0.053	0.534
DUOX1	MAPK11	68415.ENSMMSP00000016333	68415.ENSMMSP00000024879	0	0	0	0	0	0.058	0.362	0.084	0.401
DUOX1	DUOX2	68415.ENSMMSP00000016333	68415.ENSMMSP00000016704	0	0	0.051	0.979	0	0	0.828	0	0.829
DUOX1	NCF4	68415.ENSMMSP00000016333	68415.ENSMMSP00000022976	0	0	0	0	0.055	0.061	0.817	0.319	0.874
DUOX1	DUOXA1	68415.ENSMMSP00000016333	68415.ENSMMSP00000016379	0	0	0.204	0	0.437	0.903	0.537	0.698	0.992
DUOX2	DUOXA1	68415.ENSMMSP00000016704	68415.ENSMMSP00000016379	0	0	0	0	0.437	0.903	0.537	0.864	0.996
DUOX2	MAPK11	68415.ENSMMSP00000016704	68415.ENSMMSP00000024879	0	0	0	0	0	0.058	0.362	0.084	0.401
DUOX2	NCF4	68415.ENSMMSP00000016704	68415.ENSMMSP00000022976	0	0	0	0	0.055	0.061	0.817	0.48	0.904
EDNRB	MLANA	68415.ENSMMSP00000003719	68415.ENSMMSP00000002116	0	0	0	0	0.076	0	0	0.472	0.491
EDNRB	GPR143	68415.ENSMMSP00000003719	68415.ENSMMSP00000021481	0	0	0	0	0	0	0.057	0.458	0.467
EDNRB	GDNF	68415.ENSMMSP00000003719	68415.ENSMMSP00000024796	0	0	0	0	0	0	0	0.479	0.479
EDNRB	OCA2	68415.ENSMMSP00000003719	68415.ENSMMSP00000016102	0	0	0	0	0	0	0	0.499	0.499
EDNRB	MC1R	68415.ENSMMSP00000003719	68415.ENSMMSP00000008400	0	0	0	0	0	0	0	0.502	0.502
EDNRB	SLC24A5	68415.ENSMMSP00000003719	68415.ENSMMSP00000015476	0	0	0	0	0.065	0	0	0.537	0.548
EDNRB	KCNJ8	68415.ENSMMSP00000003719	68415.ENSMMSP00000031480	0	0	0	0	0.1	0	0.486	0.104	0.549
EDNRB	SLC45A2	68415.ENSMMSP00000003719	68415.ENSMMSP00000020550	0	0	0	0	0	0	0	0.552	0.552
EDNRB	TRPM1	68415.ENSMMSP00000003719	68415.ENSMMSP00000030760	0	0	0	0	0.053	0	0	0.595	0.6
EDNRB	PAX3	68415.ENSMMSP00000003719	68415.ENSMMSP00000028582	0	0	0	0	0.066	0	0	0.601	0.611
EDNRB	SOX10	68415.ENSMMSP00000003719	68415.ENSMMSP00000022862	0	0	0	0	0	0	0	0.677	0.677
EDNRB	NPY	68415.ENSMMSP00000003719	68415.ENSMMSP00000009758	0	0	0	0	0	0.127	0.547	0.33	0.711
EDNRB	TYR	68415.ENSMMSP00000003719	68415.ENSMMSP00000012485	0	0	0	0	0.058	0	0	0.763	0.767
EFCAB5	LINGO2	68415.ENSMMSP00000014868	68415.ENSMMSP00000000034	0	0	0	0	0	0.155	0	0.402	0.473
EFCAB5	GPA33	68415.ENSMMSP00000014868	68415.ENSMMSP00000021522	0	0	0	0	0	0.167	0.057	0.492	0.566
EMP3	PTGDR	68415.ENSMMSP00000000715	68415.ENSMMSP00000021023	0	0	0	0	0	0	0	0.457	0.457
EMP3	MAP3K8	68415.ENSMMSP00000000715	68415.ENSMMSP00000028595	0	0	0	0	0	0	0	0.485	0.485
EMP3	SACS	68415.ENSMMSP00000000715	68415.ENSMMSP00000004817	0	0	0	0	0	0	0	0.51	0.51
EMP3	SMOC1	68415.ENSMMSP00000000715	68415.ENSMMSP00000020725	0	0	0	0	0	0	0	0.513	0.513
ENPP1	PDE7B	68415.ENSMMSP00000024162	68415.ENSMMSP00000000149	0	0	0	0	0	0	0.884	0.122	0.893
ENPP1	SLC19A1	68415.ENSMMSP00000024162	68415.ENSMMSP00000017275	0	0	0	0	0	0	0	0.457	0.457
ENPP1	QPRT	68415.ENSMMSP00000024162	68415.ENSMMSP00000017773	0.061	0	0	0	0	0	0.876	0.045	0.879
EPHA7	PDGFC	68415.ENSMMSP00000017465	68415.ENSMMSP00000006916	0	0	0	0	0	0	0.491	0.211	0.581
EPHA7	IL7	68415.ENSMMSP00000017465	68415.ENSMMSP00000011997	0	0	0	0	0	0	0.489	0.065	0.501
EPHA7	PDGFA	68415.ENSMMSP00000017465	68415.ENSMMSP00000014152	0	0	0	0	0	0.079	0.491	0.044	0.512
EPHA7	RASAL3	68415.ENSMMSP00000017465	68415.ENSMMSP00000028157	0	0	0	0	0.057	0.116	0.344	0	0.405
EPHA7	IGSF11	68415.ENSMMSP00000017465	68415.ENSMMSP00000027869	0	0	0	0	0	0	0	0.457	0.457
EPHA7	SHC3	68415.ENSMMSP00000017465	68415.ENSMMSP00000018413	0	0	0	0	0.057	0.182	0.429	0.044	0.522
ERFE	SLC10A6	68415.ENSMMSP00000009145	68415.ENSMMSP00000021871	0	0	0	0	0	0	0	0.492	0.491
ERICH3	RASA3	68415.ENSMMSP00000016878	68415.ENSMMSP00000002868	0	0	0	0	0	0	0	0.456	0.456
ERICH3	PMEL	68415.ENSMMSP00000016878	68415.ENSMMSP00000018453	0	0	0	0	0	0.407	0.046	0	0.41
ESR1	TLE2	68415.ENSMMSP00000005779	68415.ENSMMSP00000000930	0	0	0	0	0	0.161	0.61	0.208	0.718
ESR1	NPAS2	68415.ENSMMSP00000005779	68415.ENSMMSP00000002079	0	0	0	0	0	0.31	0.249	0.215	0.557
ESR1	INSR	68415.ENSMMSP00000005779	68415.ENSMMSP00000002303	0	0	0	0	0	0.528	0.599	0.293	0.854
ESR1	FGFR1	68415.ENSMMSP00000005779	68415.ENSMMSP00000005538	0	0	0	0	0	0	0	0.457	0.457
ESR1	REM1	68415.ENSMMSP00000005779	68415.ENSMMSP00000021019	0	0	0	0	0	0.155	0	0.334	0.413
ESR1	INHBA	68415.ENSMMSP00000005779	68415.ENSMMSP00000012603	0	0	0	0	0	0	0.048	0.468	0.471
ESR1	NR4A2	68415.ENSMMSP00000005779	68415.ENSMMSP00000032855	0	0	0	0.649	0	0.237	0.213	0.21	0.484
ESR1	NR3C2	68415.ENSMMSP00000005779	68415.ENSMMSP00000012530	0	0	0	0.657	0	0	0	0.501	0.501
ESR1	TERT	68415.ENSMMSP00000005779	68415.ENSMMSP00000024766	0	0	0	0	0	0.063	0	0.492	0.503
ESR1	PPARG	68415.ENSMMSP00000005779	68415.ENSMMSP00000020067	0	0	0	0.602	0	0	0.222	0.404	0.516
ESR1	MATK	68415.ENSMMSP00000005779	68415.ENSMMSP00000030820	0	0	0	0	0	0.242	0.429	0.237	0.64
ESR1	NPY	68415.ENSMMSP00000005779	68415.ENSMMSP00000009758	0	0	0	0	0	0.087	0	0.698	0.712
ESR1	SHC3	68415.ENSMMSP00000005779	68415.ENSMMSP00000018413	0	0	0	0	0	0.236	0.614	0.335	0.786
ESR1	MAPK11	68415.ENSMMSP00000005779	68415.ENSMMSP00000024879	0	0	0	0	0	0.181	0.848	0.132	0.882
FAM107A	HS6ST2	68415.ENSMMSP00000023957	68415.ENSMMSP00000006187	0	0	0	0	0	0	0	0.497	0.497
FAM181B	PRSS23	68415.ENSMMSP00000005989	68415.ENSMMSP00000013140	0	0	0	0	0	0	0	0.6	0.6
FAM78B	MGARP	68415.ENSMMSP00000026839	68415.ENSMMSP00000001847	0	0	0	0	0.068	0	0	0.456	0.471
FAM78B	PLCL1	68415.ENSMMSP00000026839	68415.ENSMMSP00000015305	0	0	0	0	0	0	0	0.526	0.526
FAM78B	PMEL	68415.ENSMMSP00000026839	68415.ENSMMSP00000018453	0	0	0	0	0	0.204	0.478	0	0.566
FAM78B	GDF10	68415.ENSMMSP00000026839	68415.ENSMMSP00000026303	0	0	0	0	0	0	0	0.603	0.603
FAM78B	SHANK2	68415.ENSMMSP00000026839	68415.ENSMMSP00000030491	0	0	0	0	0	0	0.478	0.085	0.501
FBLN2	PCOLCE2	68415.ENSMMSP00000032185	68415.ENSMMSP00000007721	0	0	0	0	0.067	0.082	0	0.444	0.482
FBLN2	TGFB2	68415.ENSMMSP00000032185	68415.ENSMMSP00000011967	0	0	0	0	0	0.083	0.478	0.129	0.546
FBLN2	NID1	68415.ENSMMSP00000032185	68415.ENSMMSP00000017572	0	0	0	0.551	0.067	0.242	0	0.464	0.587
FBLN2	TNC	68415.ENSMMSP00000032185	68415.ENSMMSP00000019252	0	0	0	0	0.067	0.13	0.348	0.065	0.438
FBLN2	SDK2	68415.ENSMMSP00000032185	68415.ENSMMSP00000020480	0	0	0	0	0	0.364	0.064	0.083	0.406
FBLN2	SMOC1	68415.ENSMMSP00000032185	68415.ENSMMSP00000020725	0	0	0	0	0	0	0	0.473	0.473
FGF13	FGFR1	68415.ENSMMSP00000008640	68415.ENSMMSP00000005538	0	0	0	0	0	0.245	0.187	0.706	0.803
FGF13	GDNF	68415.ENSMMSP00000008640	68415.ENSMMSP00000024796	0	0	0	0	0	0	0	0.457	0.457
FGF13	SDC4	68415.ENSMMSP00000008640	68415.ENSMMSP00000023184	0	0	0	0	0	0.17	0.181	0.373	0.536
FGF13	KDR	68415.ENSMMSP00000008640	68415.ENSMMSP00000028190	0	0	0	0	0.06	0.245	0.187	0.335	0.564
FGF13	IGSF11	68415.ENSMMSP00000008640	68415.ENSMMSP00000027869	0	0	0	0	0	0	0	0.599	0.599
FGF13	PDGFRA	68415.ENSMMSP00000008640	68415.ENSMMSP00000028382	0	0	0	0	0.09	0.245	0.187	0.433	0.64
FGFR1	INSR	68415.ENSMMSP00000005538	68415.ENSMMSP00000002303	0	0	0	0.645	0	0.159	0.518	0.068	0.589
FGFR1	IL7	68415.ENSMMSP00000005538	68415.ENSMMSP00000011997	0	0	0	0	0	0	0.436	0.048	0.44
FGFR1	PROKR2	68415.ENSMMSP00000005538	68415.ENSMMSP00000011960	0	0	0	0	0	0	0	0.457	0.457
FGFR1	RASAL3	68415.ENSMMSP00000005538	68415.ENSMMSP00000028157	0	0	0	0	0	0.222	0.266	0.211	0.51
FGFR1	SDC4	68415.ENSMMSP00000005538	68415.ENSMMSP00000023184	0	0	0	0	0	0	0	0.523	0.523
FGFR1	TENM1	68415.ENSMMSP00000005538	68415.ENSMMSP00000008849	0	0	0	0	0	0.414	0.261	0.048	0.551
FGFR1	KDR	68415.ENSMMSP00000005538	68415.ENSMMSP00000028190	0	0	0	0.747	0	0.16	0.37	0.327	0.612
FGFR1	NTRK2	68415.ENSMMSP00000005538	68415.ENSMMSP00000015633	0	0	0	0.635	0	0.159	0.518	0.293	0.688
FGFR1	GDNF	68415.ENSMMSP00000005538	68415.ENSMMSP00000024796	0	0	0	0	0	0.558	0.263	0.349	0.769
FGFR1	PDGFRA	68415.ENSMMSP00000005538	68415.ENSMMSP00000028382	0	0	0	0.696	0	0.16	0.546	0.523	0.802
FGFR1	NRTN	68415.ENSMMSP00000005538	68415.ENSMMSP00000011983	0	0	0	0	0	0.6	0.468	0.188	0.812
FGFR1	PDGFA	68415.ENSMMSP00000005538	68415.ENSMMSP00000014152	0	0	0	0	0	0.11	0.838	0.324	0.894
FGFR1	PDGFC	68415.ENSMMSP00000005538	68415.ENSMMSP00000006916	0	0	0	0	0	0.18	0.875	0.145	0.904
FGFR1	SHC3	68415.ENSMMSP00000005538	68415.ENSMMSP00000018413	0	0	0	0	0	0.539	0.884	0.185	0.952
FGL2	TNFSF10	68415.ENSMMSP00000022116	68415.ENSMMSP00000005166	0	0	0	0	0.105	0	0	0.358	0.4
FGL2	NPFFR2	68415.ENSMMSP00000022116	68415.ENSMMSP00000027149	0	0	0	0	0	0.052	0	0.457	0.463
FIBIN	OTOP3	68415.ENSMMSP00000001092	68415.ENSMMSP00000018448	0	0	0	0	0	0	0	0.402	0.402
FIGNL2	GRIA2	68415.ENSMMSP00000027035	68415.ENSMMSP00000007755	0	0	0	0	0	0.179	0.44	0	0.52
FIGNL2	TYR	68415.ENSMMSP00000027035	68415.ENSMMSP00000012485	0	0	0	0	0	0.136	0.497	0.104	0.576
FIGNL2	RAB6B	68415.ENSMMSP00000027035	68415.ENSMMSP00000016046	0	0	0	0	0	0.077	0.409	0.046	0.434
FIGNL2	PRR16	68415.ENSMMSP00000027035	68415.ENSMMSP00000019730	0	0	0	0	0	0	0	0.409	0.408
FIGNL2	KIAA2012	68415.ENSMMSP00000027035	68415.ENSMMSP00000019805	0	0	0	0	0	0.25	0.265	0	0.425
FIGNL2	TERT	68415.ENSMMSP00000027035	68415.ENSMMSP00000024766	0	0	0	0	0	0	0.612	0.191	0.672
FLOT2	MYH11	68415.ENSMMSP00000011973	68415.ENSMMSP00000021250	0	0	0	0	0	0	0.745	0.059	0.749
FNDC5	SPON2	68415.ENSMMSP00000016655	68415.ENSMMSP00000014019	0	0	0	0	0	0	0	0.474	0.474
FOXC2	NFATC1	68415.ENSMMSP00000012422	68415.ENSMMSP00000009619	0	0	0	0	0	0	0	0.603	0.603
FOXP2	RORB	68415.ENSMMSP00000012652	68415.ENSMMSP00000005458	0	0	0	0	0	0.112	0.492	0.211	0.612
FOXP2	NFATC1	68415.ENSMMSP00000012652	68415.ENSMMSP00000009619	0	0	0	0	0	0.563	0.061	0.135	0.614
FOXP2	RORC	68415.ENSMMSP00000012652	68415.ENSMMSP00000021906	0	0	0	0	0	0.112	0.492	0.094	0.555
FZD1	LGR5	68415.ENSMMSP00000027654	68415.ENSMMSP00000005659	0	0	0	0	0	0	0	0.456	0.456
FZD1	FZD9	68415.ENSMMSP00000027654	68415.ENSMMSP00000006835	0	0	0	0.894	0	0	0.478	0.075	0.496
FZD1	SFRP1	68415.ENSMMSP00000027654	68415.ENSMMSP00000007082	0	0	0	0.673	0.09	0	0.847	0.173	0.874
FZD1	WNT16	68415.ENSMMSP00000027654	68415.ENSMMSP00000010639	0	0	0	0	0	0.534	0.847	0.326	0.947
FZD1	FZD8	68415.ENSMMSP00000027654	68415.ENSMMSP00000010853	0	0	0	0.901	0.07	0	0.478	0.26	0.609
FZD1	GPC2	68415.ENSMMSP00000027654	68415.ENSMMSP00000017250	0	0	0	0	0	0	0.806	0.074	0.812
FZD1	FZD2	68415.ENSMMSP00000027654	68415.ENSMMSP00000027373	0	0	0.051	0.978	0	0	0.645	0	0.648
FZD1	WNT7B	68415.ENSMMSP00000027654	68415.ENSMMSP00000031359	0	0	0	0	0	0.534	0.826	0.479	0.954
FZD1	WNT7A	68415.ENSMMSP00000027654	68415.ENSMMSP00000032212	0	0	0	0	0	0.534	0.826	0.537	0.959
FZD2	FZD9	68415.ENSMMSP00000027373	68415.ENSMMSP00000006835	0	0	0.056	0.904	0	0	0.478	0.075	0.504
FZD2	SFRP1	68415.ENSMMSP00000027373	68415.ENSMMSP00000007082	0	0	0	0.67	0.047	0	0.847	0.46	0.914
FZD2	WNT16	68415.ENSMMSP00000027373	68415.ENSMMSP00000010639	0	0	0	0	0	0.534	0.847	0.532	0.963
FZD2	FZD8	68415.ENSMMSP00000027373	68415.ENSMMSP00000010853	0	0	0.057	0.928	0.07	0	0.61	0.046	0.63
FZD2	GPC2	68415.ENSMMSP00000027373	68415.ENSMMSP00000017250	0	0	0	0	0	0	0.806	0.074	0.812
FZD2	WNT7B	68415.ENSMMSP00000027373	68415.ENSMMSP00000031359	0	0	0	0	0	0.534	0.826	0.479	0.954
FZD2	WNT7A	68415.ENSMMSP00000027373	68415.ENSMMSP00000032212	0	0	0	0	0	0.534	0.826	0.493	0.955
FZD8	FZD9	68415.ENSMMSP00000010853	68415.ENSMMSP00000006835	0	0	0.06	0.896	0	0	0.477	0.068	0.501
FZD8	SFRP1	68415.ENSMMSP00000010853	68415.ENSMMSP00000007082	0	0	0	0.65	0	0	0.829	0.135	0.845
FZD8	WNT16	68415.ENSMMSP00000010853	68415.ENSMMSP00000010639	0	0	0	0	0	0.534	0.829	0.495	0.956
FZD8	GPC2	68415.ENSMMSP00000010853	68415.ENSMMSP00000017250	0	0	0	0	0	0	0.778	0.074	0.785
FZD8	WNT7B	68415.ENSMMSP00000010853	68415.ENSMMSP00000031359	0	0	0	0	0	0.534	0.786	0.397	0.934
FZD8	WNT7A	68415.ENSMMSP00000010853	68415.ENSMMSP00000032212	0	0	0	0	0	0.534	0.786	0.397	0.934
FZD9	NTRK2	68415.ENSMMSP00000006835	68415.ENSMMSP00000015633	0	0	0	0	0	0.184	0.242	0.194	0.457
FZD9	TSHZ2	68415.ENSMMSP00000006835	68415.ENSMMSP00000019842	0	0	0	0	0	0	0	0.54	0.54
FZD9	GPC2	68415.ENSMMSP00000006835	68415.ENSMMSP00000017250	0	0	0	0	0	0	0.806	0.074	0.812
FZD9	SFRP1	68415.ENSMMSP00000006835	68415.ENSMMSP00000007082	0	0	0	0.668	0	0	0.847	0.107	0.857
FZD9	WNT16	68415.ENSMMSP00000006835	68415.ENSMMSP00000010639	0	0	0	0	0	0.534	0.847	0.2	0.937
FZD9	WNT7B	68415.ENSMMSP00000006835	68415.ENSMMSP00000031359	0	0	0	0	0	0.534	0.826	0.504	0.956
FZD9	WNT7A	68415.ENSMMSP00000006835	68415.ENSMMSP00000032212	0	0	0	0	0	0.534	0.826	0.686	0.972
GABRE	PLCE1	68415.ENSMMSP00000003960	68415.ENSMMSP00000011929	0	0	0	0	0	0	0.495	0.084	0.517
GABRE	PLCL1	68415.ENSMMSP00000003960	68415.ENSMMSP00000015305	0	0	0	0	0	0	0.884	0.077	0.888
GAD1	RIMS3	68415.ENSMMSP00000020870	68415.ENSMMSP00000006500	0	0	0	0	0	0	0.524	0.074	0.54
GAD1	GRIA2	68415.ENSMMSP00000020870	68415.ENSMMSP00000007755	0	0	0	0	0.103	0	0.378	0.325	0.59
GAD1	NPY	68415.ENSMMSP00000020870	68415.ENSMMSP00000009758	0	0	0	0	0	0	0	0.52	0.52
GAD1	MAOA	68415.ENSMMSP00000020870	68415.ENSMMSP00000013867	0	0	0	0	0	0.066	0.366	0.132	0.441
GAD1	MEIS2	68415.ENSMMSP00000020870	68415.ENSMMSP00000017618	0	0	0	0	0	0	0	0.456	0.456
GAD1	QPRT	68415.ENSMMSP00000020870	68415.ENSMMSP00000017773	0.066	0	0	0	0	0	0.497	0	0.51
GAD1	KCNH8	68415.ENSMMSP00000020870	68415.ENSMMSP00000029450	0	0	0	0	0.067	0	0.289	0.195	0.419
GAD1	SHMT1	68415.ENSMMSP00000020870	68415.ENSMMSP00000032985	0	0	0	0	0	0	0.419	0.158	0.489
GAD1	GPR143	68415.ENSMMSP00000020870	68415.ENSMMSP00000021481	0	0	0	0	0	0.165	0.478	0.145	0.594
GAD1	SLC32A1	68415.ENSMMSP00000020870	68415.ENSMMSP00000029112	0	0	0	0	0.162	0	0.616	0.679	0.887
GAS1	GAS2	68415.ENSMMSP00000016363	68415.ENSMMSP00000030936	0	0	0	0	0	0	0	0.758	0.758
GDF10	MAG	68415.ENSMMSP00000026303	68415.ENSMMSP00000003982	0	0	0	0	0	0.091	0	0.456	0.484
GDNF	NRTN	68415.ENSMMSP00000024796	68415.ENSMMSP00000011983	0	0	0	0.797	0	0	0.629	0.601	0.845
GDNF	NTRK2	68415.ENSMMSP00000024796	68415.ENSMMSP00000015633	0	0	0	0	0	0	0.144	0.488	0.542
GDNF	SOX10	68415.ENSMMSP00000024796	68415.ENSMMSP00000022862	0	0	0	0	0	0	0	0.532	0.532
GDNF	MAPK11	68415.ENSMMSP00000024796	68415.ENSMMSP00000024879	0	0	0	0	0	0	0.478	0.045	0.48
GDNF	ZBTB16	68415.ENSMMSP00000024796	68415.ENSMMSP00000028716	0	0	0	0	0	0	0	0.599	0.599
GDNF	PDGFRA	68415.ENSMMSP00000024796	68415.ENSMMSP00000028382	0	0	0	0	0	0.558	0.228	0.21	0.706
GDNF	KDR	68415.ENSMMSP00000024796	68415.ENSMMSP00000028190	0	0	0	0	0	0.558	0.228	0.244	0.719
GEM	SHANK2	68415.ENSMMSP00000001346	68415.ENSMMSP00000030491	0	0	0	0	0	0.415	0.045	0.049	0.422
GEM	RASGRP4	68415.ENSMMSP00000001346	68415.ENSMMSP00000004883	0	0	0	0	0	0.248	0.287	0.067	0.456
GEM	RASAL3	68415.ENSMMSP00000001346	68415.ENSMMSP00000028157	0	0	0	0	0	0.237	0.352	0.087	0.509
GEM	RASA3	68415.ENSMMSP00000001346	68415.ENSMMSP00000002868	0	0	0	0	0	0.123	0.487	0.064	0.542
GJB1	MAG	68415.ENSMMSP00000003140	68415.ENSMMSP00000003982	0	0	0	0	0.067	0	0	0.457	0.471
GLIS3	TENM1	68415.ENSMMSP00000002659	68415.ENSMMSP00000008849	0	0	0	0	0	0	0	0.493	0.493
GPA33	PLLP	68415.ENSMMSP00000021522	68415.ENSMMSP00000001046	0	0	0	0	0	0	0	0.729	0.729
GPC2	HS6ST2	68415.ENSMMSP00000017250	68415.ENSMMSP00000006187	0	0	0	0	0	0	0.509	0.507	0.747
GPC2	WNT16	68415.ENSMMSP00000017250	68415.ENSMMSP00000010639	0	0	0	0	0	0.236	0.213	0.085	0.401
GPC2	WNT7A	68415.ENSMMSP00000017250	68415.ENSMMSP00000032212	0	0	0	0	0	0.236	0.213	0.085	0.401
GPC2	WNT7B	68415.ENSMMSP00000017250	68415.ENSMMSP00000031359	0	0	0	0	0	0.236	0.213	0.085	0.401
GPC2	HS3ST3A1	68415.ENSMMSP00000017250	68415.ENSMMSP00000032623	0	0	0	0	0	0	0.478	0.184	0.555
GPC2	HPSE	68415.ENSMMSP00000017250	68415.ENSMMSP00000025016	0	0	0	0	0	0	0.478	0.302	0.62
GPC2	UNC5C	68415.ENSMMSP00000017250	68415.ENSMMSP00000026803	0	0	0	0	0	0.623	0	0.046	0.624
GPC2	SDC4	68415.ENSMMSP00000017250	68415.ENSMMSP00000023184	0	0	0	0	0	0	0.537	0.287	0.655
GPC2	SLIT2	68415.ENSMMSP00000017250	68415.ENSMMSP00000021936	0	0	0	0	0	0.116	0.621	0.182	0.702
GPC2	NOTUM	68415.ENSMMSP00000017250	68415.ENSMMSP00000031429	0	0	0	0	0	0.238	0.609	0.322	0.78
GPR143	MLANA	68415.ENSMMSP00000021481	68415.ENSMMSP00000002116	0	0	0	0	0.067	0.163	0	0.686	0.733
GPR143	TYR	68415.ENSMMSP00000021481	68415.ENSMMSP00000012485	0	0	0	0	0.143	0.172	0	0.681	0.753
GPR143	SLC24A5	68415.ENSMMSP00000021481	68415.ENSMMSP00000015476	0	0	0	0	0	0	0	0.549	0.549
GPR143	OCA2	68415.ENSMMSP00000021481	68415.ENSMMSP00000016102	0	0	0	0	0.076	0	0	0.6	0.614
GPR143	NDUFA4L2	68415.ENSMMSP00000021481	68415.ENSMMSP00000018246	0.042	0	0	0	0.061	0	0.492	0	0.503
GPR143	SLC45A2	68415.ENSMMSP00000021481	68415.ENSMMSP00000020550	0	0	0	0	0.179	0	0	0.672	0.719
GPR143	TRPM1	68415.ENSMMSP00000021481	68415.ENSMMSP00000030760	0	0	0	0	0	0	0	0.542	0.542
GPR143	SHMT1	68415.ENSMMSP00000021481	68415.ENSMMSP00000032985	0.103	0	0	0	0	0	0.487	0.232	0.615
GRIA2	LINGO2	68415.ENSMMSP00000007755	68415.ENSMMSP00000000034	0	0	0	0	0.06	0.24	0.112	0.235	0.449
GRIA2	PTPRD	68415.ENSMMSP00000007755	68415.ENSMMSP00000001452	0	0	0	0	0.067	0.231	0.126	0.162	0.404
GRIA2	RYR3	68415.ENSMMSP00000007755	68415.ENSMMSP00000016635	0	0	0	0	0	0	0	0.459	0.459
GRIA2	GRIN3A	68415.ENSMMSP00000007755	68415.ENSMMSP00000019874	0	0	0	0.592	0	0.073	0.863	0.135	0.88
GRIA2	VWC2	68415.ENSMMSP00000007755	68415.ENSMMSP00000029096	0	0	0	0	0.1	0	0.873	0	0.88
GRIA2	GRIK3	68415.ENSMMSP00000007755	68415.ENSMMSP00000010859	0	0	0.077	0.879	0.076	0.122	0.873	0.123	0.901
GRIA2	GRIK2	68415.ENSMMSP00000007755	68415.ENSMMSP00000014678	0	0	0.069	0.884	0.088	0.144	0.873	0.123	0.904
GRIK2	NCALD	68415.ENSMMSP00000014678	68415.ENSMMSP00000003669	0	0	0	0	0.076	0	0.614	0	0.628
GRIK2	GRIK3	68415.ENSMMSP00000014678	68415.ENSMMSP00000010859	0	0	0.049	0.981	0.058	0.144	0.873	0.326	0.922
GRIK2	GRIN3A	68415.ENSMMSP00000014678	68415.ENSMMSP00000019874	0	0	0	0.594	0.046	0.156	0.878	0.127	0.902
GRIK3	SEMA3D	68415.ENSMMSP00000010859	68415.ENSMMSP00000002031	0	0	0	0	0	0	0	0.49	0.489
GRIK3	NCALD	68415.ENSMMSP00000010859	68415.ENSMMSP00000003669	0	0	0	0	0.068	0	0.614	0	0.624
GRIK3	GRIN3A	68415.ENSMMSP00000010859	68415.ENSMMSP00000019874	0	0	0	0.589	0.06	0.156	0.794	0.193	0.85
GRIN3A	NFATC1	68415.ENSMMSP00000019874	68415.ENSMMSP00000009619	0	0	0	0	0	0	0.518	0.085	0.54
GRIN3A	KCNH8	68415.ENSMMSP00000019874	68415.ENSMMSP00000029450	0	0	0	0	0	0	0	0.465	0.465
GRIN3A	UNC5C	68415.ENSMMSP00000019874	68415.ENSMMSP00000026803	0	0	0	0	0	0	0	0.491	0.491
GRIN3A	ZBTB16	68415.ENSMMSP00000019874	68415.ENSMMSP00000028716	0	0	0	0	0	0	0	0.496	0.495
GSDMD	IL31RA	68415.ENSMMSP00000024613	68415.ENSMMSP00000001259	0	0	0.223	0	0	0	0.756	0.241	0.843
GSDMD	SACS	68415.ENSMMSP00000024613	68415.ENSMMSP00000004817	0	0	0	0	0	0	0.518	0.072	0.533
GSDMD	GSDME	68415.ENSMMSP00000024613	68415.ENSMMSP00000009919	0	0	0	0	0	0	0	0.773	0.773
GSDMD	TXNIP	68415.ENSMMSP00000024613	68415.ENSMMSP00000017485	0	0	0	0	0	0	0	0.498	0.497
GSDMD	NLRP12	68415.ENSMMSP00000024613	68415.ENSMMSP00000023195	0	0	0	0	0	0	0.639	0.307	0.739
GSDMD	TOX	68415.ENSMMSP00000024613	68415.ENSMMSP00000023671	0	0	0	0	0	0	0.476	0.061	0.486
GSDMD	KLKB1	68415.ENSMMSP00000024613	68415.ENSMMSP00000027169	0	0	0	0	0	0	0.46	0.135	0.512
GSDME	KCNQ4	68415.ENSMMSP00000009919	68415.ENSMMSP00000006314	0	0	0	0	0	0	0	0.488	0.487
GSDME	KLKB1	68415.ENSMMSP00000009919	68415.ENSMMSP00000027169	0	0	0	0	0	0	0.355	0.12	0.408
GSDME	HOXA1	68415.ENSMMSP00000009919	68415.ENSMMSP00000011097	0	0	0	0	0	0	0	0.601	0.601
HES5	SOX10	68415.ENSMMSP00000016400	68415.ENSMMSP00000022862	0	0	0	0	0	0.144	0	0.472	0.528
HIP1	TNS2	68415.ENSMMSP00000007694	68415.ENSMMSP00000030050	0	0	0	0	0.057	0.16	0.344	0.119	0.48
HMCN1	LGR5	68415.ENSMMSP00000018122	68415.ENSMMSP00000005659	0	0	0	0	0	0.172	0.449	0.058	0.532
HMGCLL1	SBSPON	68415.ENSMMSP00000027637	68415.ENSMMSP00000013956	0.076	0	0	0	0.097	0	0.379	0.171	0.512
HMGCLL1	QPRT	68415.ENSMMSP00000027637	68415.ENSMMSP00000017773	0.146	0	0	0	0.066	0	0	0.311	0.402
HMGCLL1	HTRA3	68415.ENSMMSP00000027637	68415.ENSMMSP00000025498	0.045	0	0	0	0	0	0.51	0.084	0.533
HOXA1	HOXA2	68415.ENSMMSP00000011097	68415.ENSMMSP00000011132	0	0	0	0.644	0.357	0.093	0	0.068	0.408
HOXC4	HOXC6	68415.ENSMMSP00000009530	68415.ENSMMSP00000009458	0	0	0.072	0.805	0.83	0.819	0	0.169	0.973
HOXC4	MEIS2	68415.ENSMMSP00000009530	68415.ENSMMSP00000017618	0	0	0	0	0.058	0.17	0.07	0.324	0.442
HPSE	SDC4	68415.ENSMMSP00000025016	68415.ENSMMSP00000023184	0	0	0	0	0	0	0.49	0.188	0.568
HPSE	SIAE	68415.ENSMMSP00000025016	68415.ENSMMSP00000030458	0	0	0	0	0	0	0	0.49	0.489
HPSE	LMCD1	68415.ENSMMSP00000025016	68415.ENSMMSP00000031599	0	0	0	0	0	0	0	0.514	0.514
HPSE	TM6SF1	68415.ENSMMSP00000025016	68415.ENSMMSP00000029929	0	0	0	0	0	0	0	0.535	0.535
HS3ST3A1	HS6ST2	68415.ENSMMSP00000032623	68415.ENSMMSP00000006187	0	0	0	0	0	0	0	0.515	0.515
HS6ST2	RASAL3	68415.ENSMMSP00000006187	68415.ENSMMSP00000028157	0	0	0	0	0	0	0	0.531	0.531
HTRA3	SACS	68415.ENSMMSP00000025498	68415.ENSMMSP00000004817	0	0	0	0	0	0.244	0.333	0.102	0.507
HTRA3	TNFRSF11B	68415.ENSMMSP00000025498	68415.ENSMMSP00000010160	0	0	0	0	0	0.07	0.575	0	0.587
HTRA3	KIAA2012	68415.ENSMMSP00000025498	68415.ENSMMSP00000019805	0	0	0	0	0	0.111	0.494	0.063	0.541
IGSF11	IGSF21	68415.ENSMMSP00000027869	68415.ENSMMSP00000009075	0	0	0.363	0	0	0	0	0.29	0.528
IGSF11	SLC24A5	68415.ENSMMSP00000027869	68415.ENSMMSP00000015476	0	0	0	0	0	0	0	0.482	0.482
IGSF11	KIRREL1	68415.ENSMMSP00000027869	68415.ENSMMSP00000026004	0	0	0	0	0	0	0	0.456	0.456
IGSF21	TLR3	68415.ENSMMSP00000009075	68415.ENSMMSP00000026954	0	0	0	0	0	0.163	0.058	0.33	0.425
IGSF21	NTRK2	68415.ENSMMSP00000009075	68415.ENSMMSP00000015633	0	0	0	0	0	0.171	0.061	0.456	0.539
IL31RA	PMEL	68415.ENSMMSP00000001259	68415.ENSMMSP00000018453	0	0	0	0	0.068	0.162	0.467	0.057	0.554
IL36A	INSR	68415.ENSMMSP00000002410	68415.ENSMMSP00000002303	0	0	0	0	0	0	0	0.6	0.6
IL36A	TLR3	68415.ENSMMSP00000002410	68415.ENSMMSP00000026954	0	0	0	0	0	0	0	0.465	0.465
IL36A	TLR2	68415.ENSMMSP00000002410	68415.ENSMMSP00000011847	0	0	0	0	0	0	0	0.504	0.504
IL7	MATK	68415.ENSMMSP00000011997	68415.ENSMMSP00000030820	0	0	0	0	0	0	0.436	0.084	0.461
IL7	KDR	68415.ENSMMSP00000011997	68415.ENSMMSP00000028190	0	0	0	0	0.055	0	0.515	0.104	0.553
IL7	PDGFRA	68415.ENSMMSP00000011997	68415.ENSMMSP00000028382	0	0	0	0	0.055	0	0.851	0.217	0.88
INHBA	IRF4	68415.ENSMMSP00000012603	68415.ENSMMSP00000002712	0	0	0	0	0	0	0.066	0.485	0.498
INHBA	TGFB2	68415.ENSMMSP00000012603	68415.ENSMMSP00000011967	0	0	0	0.605	0	0	0.894	0.132	0.904
INSR	PTPRD	68415.ENSMMSP00000002303	68415.ENSMMSP00000001452	0	0	0	0	0	0.179	0.61	0.066	0.674
INSR	ZBTB16	68415.ENSMMSP00000002303	68415.ENSMMSP00000028716	0	0	0	0	0	0.116	0.059	0.344	0.406
INSR	REM1	68415.ENSMMSP00000002303	68415.ENSMMSP00000021019	0	0	0	0	0.063	0.184	0.23	0.131	0.419
INSR	MATK	68415.ENSMMSP00000002303	68415.ENSMMSP00000030820	0	0	0	0.715	0.065	0.142	0.374	0.046	0.456
INSR	RRAS	68415.ENSMMSP00000002303	68415.ENSMMSP00000003462	0	0	0	0	0.063	0.184	0.335	0.058	0.456
INSR	RASGRP4	68415.ENSMMSP00000002303	68415.ENSMMSP00000004883	0	0	0	0	0	0.162	0.386	0.044	0.465
INSR	TENM1	68415.ENSMMSP00000002303	68415.ENSMMSP00000008849	0	0	0	0	0	0	0.469	0.062	0.48
INSR	NTRK2	68415.ENSMMSP00000002303	68415.ENSMMSP00000015633	0	0	0	0.67	0	0	0.542	0.069	0.555
INSR	KDR	68415.ENSMMSP00000002303	68415.ENSMMSP00000028190	0	0	0	0.575	0	0.159	0.486	0.06	0.558
INSR	PDGFRA	68415.ENSMMSP00000002303	68415.ENSMMSP00000028382	0	0	0	0.582	0	0.159	0.542	0.084	0.616
INSR	PPARG	68415.ENSMMSP00000002303	68415.ENSMMSP00000020067	0	0	0	0	0.062	0.17	0.224	0.472	0.638
INSR	ITGA5	68415.ENSMMSP00000002303	68415.ENSMMSP00000011129	0	0	0	0	0.05	0.07	0.631	0.044	0.646
INSR	PDGFA	68415.ENSMMSP00000002303	68415.ENSMMSP00000014152	0	0	0	0	0	0.079	0.847	0.046	0.853
INSR	PDGFC	68415.ENSMMSP00000002303	68415.ENSMMSP00000006916	0	0	0	0	0	0	0.891	0.086	0.896
INSR	SHC3	68415.ENSMMSP00000002303	68415.ENSMMSP00000018413	0	0	0	0	0	0.67	0.884	0.232	0.968
IRF4	TERT	68415.ENSMMSP00000002712	68415.ENSMMSP00000024766	0	0	0	0	0	0.082	0	0.379	0.405
IRF4	TYR	68415.ENSMMSP00000002712	68415.ENSMMSP00000012485	0	0	0	0	0	0.162	0.057	0.329	0.423
IRF4	MSH6	68415.ENSMMSP00000002712	68415.ENSMMSP00000012820	0	0	0	0	0.438	0.059	0	0	0.448
IRF4	PPP2R2B	68415.ENSMMSP00000002712	68415.ENSMMSP00000003455	0	0	0	0	0	0.227	0.33	0	0.459
IRF4	SLC45A2	68415.ENSMMSP00000002712	68415.ENSMMSP00000020550	0	0	0	0	0	0.102	0	0.444	0.479
IRF4	RORC	68415.ENSMMSP00000002712	68415.ENSMMSP00000021906	0	0	0	0	0	0.086	0	0.498	0.521
ISM1	PHLDB1	68415.ENSMMSP00000029482	68415.ENSMMSP00000022573	0	0	0	0	0	0	0	0.456	0.456
ISM1	NPNT	68415.ENSMMSP00000029482	68415.ENSMMSP00000030761	0	0	0	0	0	0	0	0.458	0.457
ISM1	SHMT1	68415.ENSMMSP00000029482	68415.ENSMMSP00000032985	0.09	0	0	0	0.049	0	0.497	0.206	0.608
ITGA2	TGFB1I1	68415.ENSMMSP00000005730	68415.ENSMMSP00000003306	0	0	0	0	0	0.15	0.602	0.063	0.655
ITGA2	NPNT	68415.ENSMMSP00000005730	68415.ENSMMSP00000030761	0	0	0	0	0	0.073	0.379	0.075	0.421
ITGA2	MYH11	68415.ENSMMSP00000005730	68415.ENSMMSP00000021250	0	0	0	0	0	0	0.478	0.045	0.48
ITGA2	RIMS3	68415.ENSMMSP00000005730	68415.ENSMMSP00000006500	0	0	0	0	0	0	0	0.508	0.508
ITGA2	THY1	68415.ENSMMSP00000005730	68415.ENSMMSP00000020140	0	0	0	0	0.076	0	0.379	0.297	0.561
ITGA2	KRT36	68415.ENSMMSP00000005730	68415.ENSMMSP00000019021	0	0	0	0	0	0	0	0.601	0.601
ITGA2	TNC	68415.ENSMMSP00000005730	68415.ENSMMSP00000019252	0	0	0	0	0	0.185	0.847	0.079	0.875
ITGA2	THBS2	68415.ENSMMSP00000005730	68415.ENSMMSP00000005967	0	0	0	0	0.089	0	0.863	0.233	0.895
ITGA2	LAMB2	68415.ENSMMSP00000005730	68415.ENSMMSP00000020179	0	0	0	0	0	0.171	0.884	0.157	0.911
ITGA2	LAMA3	68415.ENSMMSP00000005730	68415.ENSMMSP00000016806	0	0	0	0	0	0.161	0.884	0.308	0.926
ITGA2	ITGA5	68415.ENSMMSP00000005730	68415.ENSMMSP00000011129	0	0	0	0.588	0.057	0	0.997	0.518	0.998
ITGA5	LTBP4	68415.ENSMMSP00000011129	68415.ENSMMSP00000000473	0	0	0	0	0	0.084	0.475	0.069	0.513
ITGA5	TGFB1I1	68415.ENSMMSP00000011129	68415.ENSMMSP00000003306	0	0	0	0	0	0.188	0.541	0.294	0.713
ITGA5	THBS2	68415.ENSMMSP00000011129	68415.ENSMMSP00000005967	0	0	0	0	0.054	0.089	0.852	0.269	0.894
ITGA5	MATK	68415.ENSMMSP00000011129	68415.ENSMMSP00000030820	0	0	0	0	0	0.117	0.347	0.058	0.409
ITGA5	SGCA	68415.ENSMMSP00000011129	68415.ENSMMSP00000033178	0	0	0	0	0	0	0	0.458	0.457
ITGA5	NID1	68415.ENSMMSP00000011129	68415.ENSMMSP00000017572	0	0	0	0	0.046	0	0.057	0.456	0.467
ITGA5	THY1	68415.ENSMMSP00000011129	68415.ENSMMSP00000020140	0	0	0	0	0	0	0.379	0.205	0.485
ITGA5	LTBP2	68415.ENSMMSP00000011129	68415.ENSMMSP00000028848	0	0	0	0	0	0.084	0.475	0.069	0.513
ITGA5	KDR	68415.ENSMMSP00000011129	68415.ENSMMSP00000028190	0	0	0	0	0.056	0.084	0.478	0.084	0.531
ITGA5	SHC3	68415.ENSMMSP00000011129	68415.ENSMMSP00000018413	0	0	0	0	0	0.089	0.549	0.133	0.612
ITGA5	TRPC4	68415.ENSMMSP00000011129	68415.ENSMMSP00000022619	0	0	0	0	0.624	0	0	0	0.624
ITGA5	NPNT	68415.ENSMMSP00000011129	68415.ENSMMSP00000030761	0	0	0	0	0.051	0.14	0.537	0.216	0.664
ITGA5	TGFB2	68415.ENSMMSP00000011129	68415.ENSMMSP00000011967	0	0	0	0	0.067	0.125	0.604	0.197	0.705
ITGA5	TNC	68415.ENSMMSP00000011129	68415.ENSMMSP00000019252	0	0	0	0	0	0.185	0.846	0.079	0.874
ITGA5	LAMB2	68415.ENSMMSP00000011129	68415.ENSMMSP00000020179	0	0	0	0	0	0.171	0.852	0.321	0.909
ITGA5	LAMA3	68415.ENSMMSP00000011129	68415.ENSMMSP00000016806	0	0	0	0	0	0.353	0.847	0.29	0.923
JARID2	SACS	68415.ENSMMSP00000022587	68415.ENSMMSP00000004817	0	0	0	0	0.1	0.505	0.324	0.042	0.672
JARID2	RPL10	68415.ENSMMSP00000022587	68415.ENSMMSP00000018802	0	0	0	0	0.668	0	0	0.133	0.699
JARID2	PRUNE2	68415.ENSMMSP00000022587	68415.ENSMMSP00000019791	0	0	0	0	0	0	0.478	0.09	0.504
JPH1	PDLIM3	68415.ENSMMSP00000012913	68415.ENSMMSP00000025908	0	0	0	0	0.161	0	0	0.328	0.412
JPH1	RYR3	68415.ENSMMSP00000012913	68415.ENSMMSP00000016635	0	0	0	0	0.111	0.109	0.613	0.322	0.764
KCNA6	KCNA7	68415.ENSMMSP00000024128	68415.ENSMMSP00000004932	0	0	0.058	0.964	0	0	0.478	0	0.487
KCNA6	RPL10	68415.ENSMMSP00000024128	68415.ENSMMSP00000018802	0	0	0	0	0.161	0.487	0.056	0.048	0.561
KCNA7	RPL10	68415.ENSMMSP00000004932	68415.ENSMMSP00000018802	0	0	0	0	0.161	0.487	0.056	0.048	0.561
KCNH8	TSHZ2	68415.ENSMMSP00000029450	68415.ENSMMSP00000019842	0	0	0	0	0	0	0	0.457	0.457
KCNH8	PTGDR	68415.ENSMMSP00000029450	68415.ENSMMSP00000021023	0	0	0	0	0	0	0	0.503	0.503
KCNH8	RASL12	68415.ENSMMSP00000029450	68415.ENSMMSP00000025687	0	0	0	0	0	0	0	0.555	0.555
KCNJ8	KCNQ4	68415.ENSMMSP00000031480	68415.ENSMMSP00000006314	0	0	0	0	0.065	0	0.366	0.155	0.455
KCNJ8	KCNN2	68415.ENSMMSP00000031480	68415.ENSMMSP00000008033	0	0	0	0	0	0	0.345	0.218	0.465
KCNJ8	ST8SIA1	68415.ENSMMSP00000031480	68415.ENSMMSP00000031578	0	0	0	0	0	0	0	0.463	0.463
KCNMB1	KCNN2	68415.ENSMMSP00000024007	68415.ENSMMSP00000008033	0	0	0	0	0	0	0.814	0.109	0.827
KCNN2	KCNQ4	68415.ENSMMSP00000008033	68415.ENSMMSP00000006314	0	0	0	0	0	0	0.478	0.322	0.63
KCNN2	TNNC1	68415.ENSMMSP00000008033	68415.ENSMMSP00000011988	0	0	0	0	0	0.503	0	0	0.503
KCNQ4	TNNC1	68415.ENSMMSP00000006314	68415.ENSMMSP00000011988	0	0	0	0	0	0.455	0.073	0	0.473
KCNQ4	RPL10	68415.ENSMMSP00000006314	68415.ENSMMSP00000018802	0	0	0	0	0.161	0.487	0.056	0.048	0.561
KCNS3	RPL10	68415.ENSMMSP00000003196	68415.ENSMMSP00000018802	0	0	0	0	0.161	0.487	0.056	0.048	0.561
KDR	SEMA3E	68415.ENSMMSP00000028190	68415.ENSMMSP00000001955	0	0	0	0	0	0	0	0.484	0.483
KDR	TGFB1I1	68415.ENSMMSP00000028190	68415.ENSMMSP00000003306	0	0	0	0	0.043	0.076	0.541	0.235	0.647
KDR	PDGFC	68415.ENSMMSP00000028190	68415.ENSMMSP00000006916	0	0	0	0	0	0.248	0.863	0.371	0.929
KDR	TENM1	68415.ENSMMSP00000028190	68415.ENSMMSP00000008849	0	0	0	0	0	0.414	0.261	0.048	0.551
KDR	NRTN	68415.ENSMMSP00000028190	68415.ENSMMSP00000011983	0	0	0	0	0	0.239	0.228	0.068	0.404
KDR	PDGFA	68415.ENSMMSP00000028190	68415.ENSMMSP00000014152	0	0	0	0	0	0.396	0.847	0.506	0.95
KDR	NTRK2	68415.ENSMMSP00000028190	68415.ENSMMSP00000015633	0	0	0	0.599	0	0.159	0.412	0.075	0.502
KDR	SHC3	68415.ENSMMSP00000028190	68415.ENSMMSP00000018413	0	0	0	0	0	0.614	0.884	0.234	0.962
KDR	MAPK11	68415.ENSMMSP00000028190	68415.ENSMMSP00000024879	0	0	0	0.586	0.046	0.067	0.607	0	0.619
KDR	RASAL3	68415.ENSMMSP00000028190	68415.ENSMMSP00000028157	0	0	0	0	0	0.247	0.467	0	0.581
KDR	MATK	68415.ENSMMSP00000028190	68415.ENSMMSP00000030820	0	0	0	0.697	0	0.235	0.287	0	0.431
KDR	PDGFRA	68415.ENSMMSP00000028190	68415.ENSMMSP00000028382	0	0	0	0.71	0	0	0.809	0.132	0.827
KIAA1324L	PCLO	68415.ENSMMSP00000002429	68415.ENSMMSP00000001730	0	0	0	0	0	0.177	0.058	0.307	0.415
KIAA1324L	TNC	68415.ENSMMSP00000002429	68415.ENSMMSP00000019252	0	0	0	0	0	0.13	0.348	0.043	0.409
KIRREL1	MATK	68415.ENSMMSP00000026004	68415.ENSMMSP00000030820	0	0	0	0	0	0.168	0.478	0	0.547
KLF12	SCML4	68415.ENSMMSP00000000088	68415.ENSMMSP00000012291	0	0	0	0	0	0.164	0.063	0.305	0.408
KLF12	TLE2	68415.ENSMMSP00000000088	68415.ENSMMSP00000000930	0	0	0	0	0	0.158	0	0.334	0.415
KLF12	ZBTB10	68415.ENSMMSP00000000088	68415.ENSMMSP00000010699	0	0	0	0	0	0.07	0	0.453	0.469
KLHDC8B	METRN	68415.ENSMMSP00000020315	68415.ENSMMSP00000004055	0	0	0	0	0.061	0	0	0.467	0.478
KLHDC8B	VWC2	68415.ENSMMSP00000020315	68415.ENSMMSP00000029096	0	0	0	0	0.077	0	0	0.467	0.487
KLHL38	USP28	68415.ENSMMSP00000003170	68415.ENSMMSP00000029138	0	0	0	0	0	0.13	0	0.536	0.579
KLHL38	NEURL1B	68415.ENSMMSP00000003170	68415.ENSMMSP00000022141	0	0	0	0	0	0	0.052	0.599	0.603
KLKB1	TNC	68415.ENSMMSP00000027169	68415.ENSMMSP00000019252	0	0	0	0	0	0.105	0.607	0	0.633
KLRF1	SLCO3A1	68415.ENSMMSP00000031363	68415.ENSMMSP00000017579	0	0	0	0	0	0	0	0.539	0.539
KLRF1	TNC	68415.ENSMMSP00000031363	68415.ENSMMSP00000019252	0	0	0	0	0	0.442	0.306	0	0.596
KLRF1	TG	68415.ENSMMSP00000031363	68415.ENSMMSP00000027162	0	0	0	0	0	0.059	0.469	0	0.478
KLRG2	NLRP12	68415.ENSMMSP00000002713	68415.ENSMMSP00000023195	0	0	0	0	0	0	0	0.457	0.457
KLRG2	TNC	68415.ENSMMSP00000002713	68415.ENSMMSP00000019252	0	0	0	0	0	0.442	0.306	0	0.596
KRT36	LY6D	68415.ENSMMSP00000019021	68415.ENSMMSP00000019142	0	0	0	0	0	0	0	0.514	0.514
LAMA3	PPP2R2B	68415.ENSMMSP00000016806	68415.ENSMMSP00000003455	0	0	0	0	0	0.239	0.252	0.056	0.415
LAMA3	NID1	68415.ENSMMSP00000016806	68415.ENSMMSP00000017572	0	0	0	0	0.053	0.236	0.595	0.289	0.763
LAMA3	LAMB2	68415.ENSMMSP00000016806	68415.ENSMMSP00000020179	0	0	0	0.577	0.071	0.68	0.902	0.22	0.974
LAMB2	NFATC4	68415.ENSMMSP00000020179	68415.ENSMMSP00000008469	0	0	0	0	0	0.092	0.519	0.044	0.546
LAMB2	NID1	68415.ENSMMSP00000020179	68415.ENSMMSP00000017572	0	0	0	0	0	0.21	0.187	0.236	0.466
LAMB2	SHC3	68415.ENSMMSP00000020179	68415.ENSMMSP00000018413	0	0	0	0	0	0	0	0.481	0.481
LAMB2	MAP3K8	68415.ENSMMSP00000020179	68415.ENSMMSP00000028595	0	0	0	0	0	0	0.365	0.121	0.417
LAMB2	UNC5C	68415.ENSMMSP00000020179	68415.ENSMMSP00000026803	0	0	0	0	0	0	0.521	0.137	0.568
LAYN	TNC	68415.ENSMMSP00000020147	68415.ENSMMSP00000019252	0	0	0	0	0	0.442	0.306	0	0.596
LGR5	MAG	68415.ENSMMSP00000005659	68415.ENSMMSP00000003982	0	0	0	0	0	0.172	0.449	0	0.524
LGR5	LHX2	68415.ENSMMSP00000005659	68415.ENSMMSP00000023108	0	0	0	0	0	0	0	0.46	0.459
LHX2	TCF4	68415.ENSMMSP00000023108	68415.ENSMMSP00000007913	0	0	0	0	0	0.193	0.339	0.091	0.472
LHX2	NFATC1	68415.ENSMMSP00000023108	68415.ENSMMSP00000009619	0	0	0	0	0	0	0	0.57	0.57
LHX2	TYR	68415.ENSMMSP00000023108	68415.ENSMMSP00000012485	0	0	0	0	0	0.085	0	0.492	0.515
LHX2	LMO1	68415.ENSMMSP00000023108	68415.ENSMMSP00000026375	0	0	0	0.866	0.042	0.624	0	0.059	0.631
LHX2	LMO3	68415.ENSMMSP00000023108	68415.ENSMMSP00000029870	0	0	0	0.797	0.042	0.624	0	0.059	0.631
LINGO2	RTN4R	68415.ENSMMSP00000000034	68415.ENSMMSP00000008211	0	0	0.132	0.609	0.07	0.236	0	0.329	0.531
LINGO2	MAG	68415.ENSMMSP00000000034	68415.ENSMMSP00000003982	0	0	0	0	0	0.169	0.431	0.105	0.539
LMCD1	SMARCA1	68415.ENSMMSP00000031599	68415.ENSMMSP00000009182	0	0	0	0	0	0.072	0	0.38	0.4
LMO1	TCF4	68415.ENSMMSP00000026375	68415.ENSMMSP00000007913	0	0	0	0	0	0.193	0.608	0.084	0.684
LMO1	ZBTB10	68415.ENSMMSP00000026375	68415.ENSMMSP00000010699	0	0	0	0	0	0.116	0	0.379	0.427
LMO1	VWC2	68415.ENSMMSP00000026375	68415.ENSMMSP00000029096	0	0	0	0	0	0	0	0.509	0.509
LMO3	TCF4	68415.ENSMMSP00000029870	68415.ENSMMSP00000007913	0	0	0	0	0	0.193	0.608	0.084	0.684
LMO3	ZBTB10	68415.ENSMMSP00000029870	68415.ENSMMSP00000010699	0	0	0	0	0	0.116	0	0.379	0.427
LMO3	VWC2	68415.ENSMMSP00000029870	68415.ENSMMSP00000029096	0	0	0	0	0	0	0	0.509	0.509
LOXL2	TNC	68415.ENSMMSP00000017174	68415.ENSMMSP00000019252	0	0	0	0	0	0.13	0.348	0.043	0.409
LOXL2	LOXL3	68415.ENSMMSP00000017174	68415.ENSMMSP00000020644	0	0	0.059	0.958	0	0.236	0.626	0	0.707
LOXL3	TNC	68415.ENSMMSP00000020644	68415.ENSMMSP00000019252	0	0	0	0	0	0.13	0.348	0.043	0.409
LTBP2	LTBP4	68415.ENSMMSP00000028848	68415.ENSMMSP00000000473	0	0	0	0.856	0	0.075	0.478	0.211	0.585
LTBP2	TGFB1I1	68415.ENSMMSP00000028848	68415.ENSMMSP00000003306	0	0	0	0	0	0	0	0.451	0.451
LTBP2	THBS2	68415.ENSMMSP00000028848	68415.ENSMMSP00000005967	0	0	0	0	0.104	0	0.499	0.21	0.614
LTBP2	NFATC4	68415.ENSMMSP00000028848	68415.ENSMMSP00000008469	0	0	0	0	0	0	0	0.468	0.468
LTBP2	TGFB2	68415.ENSMMSP00000028848	68415.ENSMMSP00000011967	0	0	0	0	0	0.083	0.633	0.587	0.848
LTBP2	RFLNA	68415.ENSMMSP00000028848	68415.ENSMMSP00000013904	0	0	0	0	0	0	0	0.458	0.457
LTBP2	TNC	68415.ENSMMSP00000028848	68415.ENSMMSP00000019252	0	0	0	0	0.075	0.13	0.348	0.043	0.43
LTBP2	PALLD	68415.ENSMMSP00000028848	68415.ENSMMSP00000029610	0	0	0	0	0	0.153	0.06	0.312	0.404
LTBP4	TNC	68415.ENSMMSP00000000473	68415.ENSMMSP00000019252	0	0	0	0	0	0.13	0.348	0.043	0.409
LTBP4	SDC4	68415.ENSMMSP00000000473	68415.ENSMMSP00000023184	0	0	0	0	0	0	0.386	0.133	0.444
LTBP4	THBS2	68415.ENSMMSP00000000473	68415.ENSMMSP00000005967	0	0	0	0	0.051	0	0.499	0.119	0.544
LTBP4	SBSPON	68415.ENSMMSP00000000473	68415.ENSMMSP00000013956	0	0	0	0	0	0.109	0.075	0.589	0.631
LTBP4	METRN	68415.ENSMMSP00000000473	68415.ENSMMSP00000004055	0	0	0	0	0	0.121	0.057	0.599	0.638
LTBP4	TGFB2	68415.ENSMMSP00000000473	68415.ENSMMSP00000011967	0	0	0	0	0	0.083	0.633	0.536	0.83
MACC1	ZNF652	68415.ENSMMSP00000033187	68415.ENSMMSP00000033226	0	0	0	0	0	0	0.06	0.457	0.467
MAG	PLLP	68415.ENSMMSP00000003982	68415.ENSMMSP00000001046	0	0	0	0	0.092	0	0	0.471	0.499
MAG	PTPRD	68415.ENSMMSP00000003982	68415.ENSMMSP00000001452	0	0	0	0.559	0.052	0.115	0.349	0.07	0.424
MAG	MAP1B	68415.ENSMMSP00000003982	68415.ENSMMSP00000019503	0	0	0	0	0	0.173	0	0.339	0.429
MAG	PDGFRA	68415.ENSMMSP00000003982	68415.ENSMMSP00000028382	0	0	0	0	0	0.121	0	0.527	0.566
MAG	RTN4R	68415.ENSMMSP00000003982	68415.ENSMMSP00000008211	0	0	0	0	0	0.243	0.056	0.501	0.612
MAG	SOX10	68415.ENSMMSP00000003982	68415.ENSMMSP00000022862	0	0	0	0	0.102	0	0.478	0.504	0.747
MAOA	SMARCA1	68415.ENSMMSP00000013867	68415.ENSMMSP00000009182	0	0	0	0	0	0.235	0.294	0.06	0.447
MAOA	MSH6	68415.ENSMMSP00000013867	68415.ENSMMSP00000012820	0	0	0	0	0.1	0.114	0.783	0.044	0.812
MAOA	TOX	68415.ENSMMSP00000013867	68415.ENSMMSP00000023671	0	0	0	0	0	0.181	0.437	0.066	0.531
MAOA	MAT1A	68415.ENSMMSP00000013867	68415.ENSMMSP00000031142	0	0	0	0	0	0	0.489	0.209	0.578
MAPK11	PTPRD	68415.ENSMMSP00000024879	68415.ENSMMSP00000001452	0	0	0	0	0.067	0.243	0.349	0.06	0.509
MAPK11	MYLK4	68415.ENSMMSP00000024879	68415.ENSMMSP00000002205	0	0	0.17	0.615	0	0.237	0.136	0.059	0.416
MAPK11	METRN	68415.ENSMMSP00000024879	68415.ENSMMSP00000004055	0	0	0	0	0	0.186	0.397	0.086	0.512
MAPK11	TP73	68415.ENSMMSP00000024879	68415.ENSMMSP00000007168	0	0	0	0	0	0.227	0.486	0.045	0.587
MAPK11	NFATC1	68415.ENSMMSP00000024879	68415.ENSMMSP00000009619	0	0	0	0	0.046	0	0.497	0.085	0.522
MAPK11	SHC3	68415.ENSMMSP00000024879	68415.ENSMMSP00000018413	0	0	0	0	0	0.217	0.261	0.084	0.423
MAPK11	NCF4	68415.ENSMMSP00000024879	68415.ENSMMSP00000022976	0	0	0	0	0.06	0.185	0.837	0.068	0.868
MAPK11	TNS2	68415.ENSMMSP00000024879	68415.ENSMMSP00000030050	0	0	0	0	0	0.246	0.227	0.079	0.416
MAPK11	NR4A2	68415.ENSMMSP00000024879	68415.ENSMMSP00000032855	0	0	0	0	0	0.102	0.422	0	0.458
MAPK11	MATK	68415.ENSMMSP00000024879	68415.ENSMMSP00000030820	0	0	0	0.589	0	0.206	0.459	0.044	0.553
MAT1A	SHMT1	68415.ENSMMSP00000031142	68415.ENSMMSP00000032985	0.058	0	0	0	0.749	0.1	0	0.246	0.818
MATK	PTPRD	68415.ENSMMSP00000030820	68415.ENSMMSP00000001452	0	0	0	0	0.063	0.218	0.314	0.063	0.465
MATK	TGFB1I1	68415.ENSMMSP00000030820	68415.ENSMMSP00000003306	0	0	0	0	0.153	0.235	0.626	0.241	0.791
MATK	PLXNC1	68415.ENSMMSP00000030820	68415.ENSMMSP00000013362	0	0	0	0	0	0.152	0.38	0.047	0.455
MATK	PDGFA	68415.ENSMMSP00000030820	68415.ENSMMSP00000014152	0	0	0	0	0	0.079	0.395	0	0.418
MATK	NTRK2	68415.ENSMMSP00000030820	68415.ENSMMSP00000015633	0	0	0	0.706	0	0.105	0.884	0	0.891
MATK	SHC3	68415.ENSMMSP00000030820	68415.ENSMMSP00000018413	0	0	0	0	0	0.238	0.621	0.315	0.784
MATK	PLXNA4	68415.ENSMMSP00000030820	68415.ENSMMSP00000021405	0	0	0	0	0	0.152	0.38	0.047	0.455
MATK	UNC5C	68415.ENSMMSP00000030820	68415.ENSMMSP00000026803	0	0	0	0	0	0.087	0.374	0.061	0.416
MATK	PDGFRA	68415.ENSMMSP00000030820	68415.ENSMMSP00000028382	0	0	0	0.686	0.065	0.235	0.478	0	0.594
MATK	TNS2	68415.ENSMMSP00000030820	68415.ENSMMSP00000030050	0	0	0	0	0	0.235	0.328	0.067	0.478
MATK	ZFR2	68415.ENSMMSP00000030820	68415.ENSMMSP00000030782	0	0.003	0	0	0	0	0.811	0	0.811
MC1R	SOX10	68415.ENSMMSP00000008400	68415.ENSMMSP00000022862	0	0	0	0	0.051	0	0	0.457	0.462
MC1R	SLC45A2	68415.ENSMMSP00000008400	68415.ENSMMSP00000020550	0	0	0	0	0.051	0	0	0.527	0.531
MC1R	OCA2	68415.ENSMMSP00000008400	68415.ENSMMSP00000016102	0	0	0	0	0	0	0	0.549	0.549
MC1R	SLC24A5	68415.ENSMMSP00000008400	68415.ENSMMSP00000015476	0	0	0	0	0	0	0	0.687	0.687
MC1R	TYR	68415.ENSMMSP00000008400	68415.ENSMMSP00000012485	0	0	0	0	0	0	0	0.768	0.768
MCF2L	PTPRD	68415.ENSMMSP00000002042	68415.ENSMMSP00000001452	0	0	0	0	0	0.088	0	0.587	0.607
MEIS2	TSHZ2	68415.ENSMMSP00000017618	68415.ENSMMSP00000019842	0	0	0	0	0	0.227	0.37	0.29	0.624
METRN	VWC2	68415.ENSMMSP00000004055	68415.ENSMMSP00000029096	0	0	0	0	0	0	0	0.539	0.539
MLANA	PLEKHD1	68415.ENSMMSP00000002116	68415.ENSMMSP00000020486	0	0	0	0	0	0	0	0.402	0.402
MLANA	PAX3	68415.ENSMMSP00000002116	68415.ENSMMSP00000028582	0	0	0	0	0	0	0	0.457	0.457
MLANA	SOX10	68415.ENSMMSP00000002116	68415.ENSMMSP00000022862	0	0	0	0	0	0	0	0.564	0.564
MLANA	PMEL	68415.ENSMMSP00000002116	68415.ENSMMSP00000018453	0	0	0	0	0.202	0	0	0.517	0.598
MLANA	OCA2	68415.ENSMMSP00000002116	68415.ENSMMSP00000016102	0	0	0	0	0.105	0	0	0.6	0.626
MLANA	TSPAN10	68415.ENSMMSP00000002116	68415.ENSMMSP00000031770	0	0	0	0	0.201	0	0	0.582	0.651
MLANA	TRPM1	68415.ENSMMSP00000002116	68415.ENSMMSP00000030760	0	0	0	0	0.179	0	0	0.683	0.728
MLANA	SLC24A5	68415.ENSMMSP00000002116	68415.ENSMMSP00000015476	0	0	0	0	0.302	0	0	0.674	0.762
MLANA	SLC45A2	68415.ENSMMSP00000002116	68415.ENSMMSP00000020550	0	0	0	0	0.436	0	0	0.688	0.816
MLANA	TYR	68415.ENSMMSP00000002116	68415.ENSMMSP00000012485	0	0	0	0	0.852	0	0	0.801	0.969
MMP11	THBS2	68415.ENSMMSP00000025436	68415.ENSMMSP00000005967	0	0	0	0	0.067	0.069	0.186	0.457	0.564
MMP11	NID1	68415.ENSMMSP00000025436	68415.ENSMMSP00000017572	0	0	0	0	0	0	0.478	0.082	0.5
MMP11	TNC	68415.ENSMMSP00000025436	68415.ENSMMSP00000019252	0	0	0	0	0	0.158	0.783	0.05	0.811
MMP11	NCF4	68415.ENSMMSP00000025436	68415.ENSMMSP00000022976	0	0	0	0	0.075	0	0.49	0	0.508
MMP28	TNC	68415.ENSMMSP00000016286	68415.ENSMMSP00000019252	0	0	0	0	0	0.158	0.783	0.05	0.811
MSH6	SMARCA1	68415.ENSMMSP00000012820	68415.ENSMMSP00000009182	0	0	0	0	0.099	0.134	0.042	0.602	0.662
MTMR11	PIK3C2G	68415.ENSMMSP00000028015	68415.ENSMMSP00000029954	0	0	0	0	0	0	0.444	0.071	0.461
MTMR9	PIK3C2G	68415.ENSMMSP00000003635	68415.ENSMMSP00000029954	0	0	0	0	0	0	0.444	0.071	0.461
MVB12B	VPS37D	68415.ENSMMSP00000025372	68415.ENSMMSP00000005986	0	0	0	0	0.053	0.81	0.983	0.755	0.999
MXRA5	TGFB1I1	68415.ENSMMSP00000025737	68415.ENSMMSP00000003306	0	0	0	0	0	0	0	0.6	0.6
MYH11	TGFB1I1	68415.ENSMMSP00000021250	68415.ENSMMSP00000003306	0	0	0	0	0.066	0.161	0.518	0.087	0.609
MYH11	TNFRSF11B	68415.ENSMMSP00000021250	68415.ENSMMSP00000010160	0	0	0	0	0	0	0	0.457	0.457
MYH11	TNNC1	68415.ENSMMSP00000021250	68415.ENSMMSP00000011988	0	0	0	0	0.069	0.239	0.478	0.067	0.608
MYH11	PALLD	68415.ENSMMSP00000021250	68415.ENSMMSP00000029610	0	0	0	0	0.085	0.185	0.213	0.123	0.416
MYH11	PDGFRA	68415.ENSMMSP00000021250	68415.ENSMMSP00000028382	0	0	0	0	0	0	0	0.52	0.52
MYH11	PDLIM3	68415.ENSMMSP00000021250	68415.ENSMMSP00000025908	0	0	0	0	0.09	0.161	0.258	0.307	0.554
MYH11	RNF213	68415.ENSMMSP00000021250	68415.ENSMMSP00000030401	0	0	0	0	0	0.238	0.416	0.084	0.556
MYH11	MYH3	68415.ENSMMSP00000021250	68415.ENSMMSP00000032151	0	0	0.091	0.883	0	0.171	0.873	0	0.896
MYH3	TGFB1I1	68415.ENSMMSP00000032151	68415.ENSMMSP00000003306	0	0	0	0	0.066	0.161	0.478	0.087	0.576
MYH3	TNNC1	68415.ENSMMSP00000032151	68415.ENSMMSP00000011988	0	0	0	0	0.101	0.239	0.645	0.225	0.786
MYH3	PDLIM3	68415.ENSMMSP00000032151	68415.ENSMMSP00000025908	0	0	0	0	0.102	0.161	0.258	0.202	0.494
MYH3	MYOM2	68415.ENSMMSP00000032151	68415.ENSMMSP00000026710	0	0	0	0	0.068	0	0	0.481	0.495
MYH3	PAX3	68415.ENSMMSP00000032151	68415.ENSMMSP00000028582	0	0	0	0	0	0.08	0	0.493	0.513
MYH3	SGCA	68415.ENSMMSP00000032151	68415.ENSMMSP00000033178	0	0	0	0	0	0	0	0.601	0.601
MYLK4	PALLD	68415.ENSMMSP00000002205	68415.ENSMMSP00000029610	0	0	0	0	0.1	0.134	0.362	0.049	0.463
MYLK4	MYOM2	68415.ENSMMSP00000002205	68415.ENSMMSP00000026710	0	0	0	0	0.161	0.088	0	0.481	0.568
MYOM2	SRL	68415.ENSMMSP00000026710	68415.ENSMMSP00000009118	0	0	0	0	0.195	0	0	0.326	0.434
MYOM2	TERT	68415.ENSMMSP00000026710	68415.ENSMMSP00000024766	0	0	0	0	0	0.179	0.599	0.087	0.673
MYOM2	SVIL	68415.ENSMMSP00000026710	68415.ENSMMSP00000029575	0	0	0	0	0	0	0	0.474	0.474
NCALD	RYR3	68415.ENSMMSP00000003669	68415.ENSMMSP00000016635	0	0	0	0	0.045	0.424	0.051	0	0.432
NCF4	TGFBI	68415.ENSMMSP00000022976	68415.ENSMMSP00000007461	0	0	0	0	0.1	0	0	0.68	0.699
NCF4	TRIM46	68415.ENSMMSP00000022976	68415.ENSMMSP00000011642	0	0	0	0	0	0	0	0.502	0.502
NCF4	PDGFRA	68415.ENSMMSP00000022976	68415.ENSMMSP00000028382	0	0	0	0	0	0	0	0.65	0.65
NFATC1	NFATC4	68415.ENSMMSP00000009619	68415.ENSMMSP00000008469	0	0	0	0.789	0	0.071	0.894	0.218	0.916
NFATC4	SACS	68415.ENSMMSP00000008469	68415.ENSMMSP00000004817	0	0	0	0	0.065	0	0.466	0.068	0.494
NID1	SGCA	68415.ENSMMSP00000017572	68415.ENSMMSP00000033178	0	0	0	0	0	0	0	0.456	0.456
NID1	PMEL	68415.ENSMMSP00000017572	68415.ENSMMSP00000018453	0	0	0	0	0	0.189	0.478	0	0.558
NLRP12	TXNIP	68415.ENSMMSP00000023195	68415.ENSMMSP00000017485	0	0	0	0	0	0	0.602	0.208	0.671
NOTUM	SFRP1	68415.ENSMMSP00000031429	68415.ENSMMSP00000007082	0	0	0	0	0	0	0.053	0.456	0.462
NOTUM	WNT16	68415.ENSMMSP00000031429	68415.ENSMMSP00000010639	0	0	0	0	0	0.244	0.884	0.132	0.917
NOTUM	WNT7B	68415.ENSMMSP00000031429	68415.ENSMMSP00000031359	0	0	0	0	0	0.244	0.827	0.187	0.884
NOTUM	WNT7A	68415.ENSMMSP00000031429	68415.ENSMMSP00000032212	0	0	0	0	0	0.244	0.849	0.197	0.9
NPAS2	NR3C2	68415.ENSMMSP00000002079	68415.ENSMMSP00000012530	0	0	0	0	0	0.31	0.249	0.049	0.464
NPAS2	PAX3	68415.ENSMMSP00000002079	68415.ENSMMSP00000028582	0	0	0	0	0	0	0.478	0.068	0.492
NPAS2	PPARG	68415.ENSMMSP00000002079	68415.ENSMMSP00000020067	0	0	0	0	0	0.31	0.249	0.144	0.517
NPAS2	NR1D1	68415.ENSMMSP00000002079	68415.ENSMMSP00000031677	0	0	0	0	0	0	0.179	0.685	0.73
NPAS2	RORC	68415.ENSMMSP00000002079	68415.ENSMMSP00000021906	0	0	0	0	0	0.557	0.471	0.224	0.802
NPAS2	RORB	68415.ENSMMSP00000002079	68415.ENSMMSP00000005458	0	0	0	0	0	0.557	0.378	0.466	0.84
NPAS2	PER2	68415.ENSMMSP00000002079	68415.ENSMMSP00000009550	0	0	0	0.553	0	0.808	0.884	0.667	0.991
NPFFR2	PLCE1	68415.ENSMMSP00000027149	68415.ENSMMSP00000011929	0	0	0	0	0	0.088	0.476	0.066	0.514
NPFFR2	PLCL1	68415.ENSMMSP00000027149	68415.ENSMMSP00000015305	0	0	0	0	0	0.088	0.476	0.066	0.514
NPFFR2	RGR	68415.ENSMMSP00000027149	68415.ENSMMSP00000028154	0	0	0	0	0.059	0	0.526	0.069	0.548
NPFFR2	TRH	68415.ENSMMSP00000027149	68415.ENSMMSP00000032553	0	0	0	0	0	0	0.479	0.21	0.57
NPNT	SPON2	68415.ENSMMSP00000030761	68415.ENSMMSP00000014019	0	0	0	0	0	0	0	0.523	0.523
NPNT	SLC8A1	68415.ENSMMSP00000030761	68415.ENSMMSP00000016966	0	0	0	0	0	0	0.526	0.075	0.542
NPY	S1PR1	68415.ENSMMSP00000009758	68415.ENSMMSP00000021304	0	0	0	0	0	0.127	0.368	0.045	0.427
NPY	TG	68415.ENSMMSP00000009758	68415.ENSMMSP00000027162	0	0	0	0	0	0	0	0.488	0.487
NPY	WNT7B	68415.ENSMMSP00000009758	68415.ENSMMSP00000031359	0	0	0	0	0	0	0	0.613	0.613
NPY	WNT7A	68415.ENSMMSP00000009758	68415.ENSMMSP00000032212	0	0	0	0	0	0	0	0.613	0.613
NPY	OPRK1	68415.ENSMMSP00000009758	68415.ENSMMSP00000026027	0	0	0	0	0	0.127	0.607	0.135	0.677
NPY	TRH	68415.ENSMMSP00000009758	68415.ENSMMSP00000032553	0	0	0	0	0	0	0	0.908	0.908
NR1D1	PER2	68415.ENSMMSP00000031677	68415.ENSMMSP00000009550	0	0	0	0	0.092	0.214	0	0.732	0.792
NR1D1	RORC	68415.ENSMMSP00000031677	68415.ENSMMSP00000021906	0	0	0	0.763	0.069	0	0.373	0.19	0.485
NR4A2	NTNG2	68415.ENSMMSP00000032855	68415.ENSMMSP00000012176	0	0	0	0	0	0	0	0.456	0.456
NRTN	PDGFRA	68415.ENSMMSP00000011983	68415.ENSMMSP00000028382	0	0	0	0	0	0.239	0.228	0.068	0.404
NRTN	NTRK2	68415.ENSMMSP00000011983	68415.ENSMMSP00000015633	0	0	0	0	0	0	0.144	0.384	0.45
NTNG2	RORB	68415.ENSMMSP00000012176	68415.ENSMMSP00000005458	0	0	0	0	0	0	0	0.706	0.706
NTNG2	UNC5C	68415.ENSMMSP00000012176	68415.ENSMMSP00000026803	0	0	0	0	0	0.095	0.478	0.209	0.593
NTNG2	OPRK1	68415.ENSMMSP00000012176	68415.ENSMMSP00000026027	0	0	0	0	0	0	0	0.604	0.604
NTRK2	PTPRD	68415.ENSMMSP00000015633	68415.ENSMMSP00000001452	0	0	0	0	0	0.737	0.609	0.134	0.903
NTRK2	RRAS	68415.ENSMMSP00000015633	68415.ENSMMSP00000003462	0	0	0	0	0.063	0.184	0.242	0.193	0.469
NTRK2	RASGRP4	68415.ENSMMSP00000015633	68415.ENSMMSP00000004883	0	0	0	0	0	0.162	0.271	0.349	0.567
NTRK2	PDGFC	68415.ENSMMSP00000015633	68415.ENSMMSP00000006916	0	0	0	0	0	0	0.863	0.155	0.879
NTRK2	TENM1	68415.ENSMMSP00000015633	68415.ENSMMSP00000008849	0	0	0	0	0.122	0	0.361	0	0.414
NTRK2	WNT16	68415.ENSMMSP00000015633	68415.ENSMMSP00000010639	0	0	0	0	0	0.233	0.254	0.079	0.426
NTRK2	PLXNC1	68415.ENSMMSP00000015633	68415.ENSMMSP00000013362	0	0	0	0	0	0.194	0.133	0.216	0.404
NTRK2	PDGFA	68415.ENSMMSP00000015633	68415.ENSMMSP00000014152	0	0	0	0	0	0.079	0.847	0.061	0.856
NTRK2	WNT7A	68415.ENSMMSP00000015633	68415.ENSMMSP00000032212	0	0	0	0	0.067	0.233	0.254	0.079	0.442
NTRK2	WNT7B	68415.ENSMMSP00000015633	68415.ENSMMSP00000031359	0	0	0	0	0.067	0.233	0.254	0.079	0.442
NTRK2	REM1	68415.ENSMMSP00000015633	68415.ENSMMSP00000021019	0	0	0	0	0.063	0.184	0.177	0.231	0.451
NTRK2	PDGFRA	68415.ENSMMSP00000015633	68415.ENSMMSP00000028382	0	0	0	0.601	0	0.159	0.542	0.162	0.649
NTRK2	ZFR2	68415.ENSMMSP00000015633	68415.ENSMMSP00000030782	0	0	0	0	0	0	0.811	0	0.811
NTRK2	SHC3	68415.ENSMMSP00000015633	68415.ENSMMSP00000018413	0	0	0	0	0.045	0.682	0.884	0.331	0.973
NUAK1	TP73	68415.ENSMMSP00000028513	68415.ENSMMSP00000007168	0	0	0	0	0	0.105	0.376	0	0.417
OCA2	TYR	68415.ENSMMSP00000016102	68415.ENSMMSP00000012485	0	0	0	0	0.193	0	0	0.891	0.908
OCA2	SLC24A5	68415.ENSMMSP00000016102	68415.ENSMMSP00000015476	0.136	0	0	0	0.076	0	0	0.91	0.921
OCA2	PIK3C2G	68415.ENSMMSP00000016102	68415.ENSMMSP00000029954	0	0	0	0	0	0	0	0.445	0.445
OCA2	TRPM1	68415.ENSMMSP00000016102	68415.ENSMMSP00000030760	0	0	0	0	0.066	0	0	0.594	0.604
OCA2	SLC45A2	68415.ENSMMSP00000016102	68415.ENSMMSP00000020550	0	0	0	0	0	0	0	0.728	0.728
OPRK1	SLC28A2	68415.ENSMMSP00000026027	68415.ENSMMSP00000016023	0	0	0	0	0	0	0	0.523	0.523
OTOP3	RORC	68415.ENSMMSP00000018448	68415.ENSMMSP00000021906	0	0	0	0	0	0	0	0.463	0.463
OTOP3	RGR	68415.ENSMMSP00000018448	68415.ENSMMSP00000028154	0	0	0	0	0	0	0	0.764	0.764
P3H2	PDIA2	68415.ENSMMSP00000007221	68415.ENSMMSP00000006558	0	0	0	0	0.087	0	0.578	0.16	0.648
PALLD	TGFB1I1	68415.ENSMMSP00000029610	68415.ENSMMSP00000003306	0	0	0	0	0	0.091	0.235	0.32	0.485
PALLD	TNNC1	68415.ENSMMSP00000029610	68415.ENSMMSP00000011988	0	0	0	0	0.097	0.236	0.422	0.086	0.586
PALLD	PMEL	68415.ENSMMSP00000029610	68415.ENSMMSP00000018453	0	0	0	0	0	0.407	0.046	0	0.41
PAX3	TYR	68415.ENSMMSP00000028582	68415.ENSMMSP00000012485	0	0	0	0	0.058	0.078	0	0.738	0.752
PAX3	SLC45A2	68415.ENSMMSP00000028582	68415.ENSMMSP00000020550	0	0	0	0	0	0	0	0.537	0.537
PAX3	SOX10	68415.ENSMMSP00000028582	68415.ENSMMSP00000022862	0	0	0	0	0.1	0.239	0	0.768	0.827
PAX3	PDGFRA	68415.ENSMMSP00000028582	68415.ENSMMSP00000028382	0	0	0	0	0.053	0	0	0.493	0.499
PCLO	RIMS3	68415.ENSMMSP00000001730	68415.ENSMMSP00000006500	0	0	0	0.632	0	0.134	0.541	0.049	0.588
PCOLCE2	SEMA3E	68415.ENSMMSP00000007721	68415.ENSMMSP00000001955	0	0	0	0	0	0.205	0.253	0.077	0.403
PCOLCE2	SEMA3D	68415.ENSMMSP00000007721	68415.ENSMMSP00000002031	0	0	0	0	0	0.205	0.253	0.077	0.403
PCOLCE2	PDGFRA	68415.ENSMMSP00000007721	68415.ENSMMSP00000028382	0	0	0	0	0.068	0.179	0.266	0.133	0.447
PCOLCE2	PLXNC1	68415.ENSMMSP00000007721	68415.ENSMMSP00000013362	0	0	0	0	0	0.236	0.301	0.072	0.461
PCOLCE2	PLXNA4	68415.ENSMMSP00000007721	68415.ENSMMSP00000021405	0	0	0	0	0	0.236	0.301	0.102	0.478
PDGFA	THBS2	68415.ENSMMSP00000014152	68415.ENSMMSP00000005967	0	0	0	0	0	0	0.645	0.093	0.664
PDGFA	PDGFC	68415.ENSMMSP00000014152	68415.ENSMMSP00000006916	0	0	0	0	0	0	0.875	0.748	0.967
PDGFA	TGFB2	68415.ENSMMSP00000014152	68415.ENSMMSP00000011967	0	0	0	0	0	0	0.064	0.492	0.504
PDGFA	PDGFRA	68415.ENSMMSP00000014152	68415.ENSMMSP00000028382	0	0	0	0	0	0.759	0.955	0.951	0.999
PDGFC	TENM1	68415.ENSMMSP00000006916	68415.ENSMMSP00000008849	0	0	0	0	0	0	0.49	0.067	0.503
PDGFC	PDGFRA	68415.ENSMMSP00000006916	68415.ENSMMSP00000028382	0	0	0	0	0	0.707	0.894	0.883	0.996
PDGFRA	TGFB1I1	68415.ENSMMSP00000028382	68415.ENSMMSP00000003306	0	0	0	0	0.067	0.076	0.486	0.112	0.553
PDGFRA	TGFBI	68415.ENSMMSP00000028382	68415.ENSMMSP00000007461	0	0	0	0	0	0	0	0.723	0.723
PDGFRA	TENM1	68415.ENSMMSP00000028382	68415.ENSMMSP00000008849	0	0	0	0	0	0.414	0.261	0.048	0.551
PDGFRA	TNFRSF11B	68415.ENSMMSP00000028382	68415.ENSMMSP00000010160	0	0	0	0	0	0	0	0.465	0.465
PDGFRA	SHC3	68415.ENSMMSP00000028382	68415.ENSMMSP00000018413	0	0	0	0	0	0.614	0.884	0.091	0.955
PDGFRA	PPARG	68415.ENSMMSP00000028382	68415.ENSMMSP00000020067	0	0	0	0	0	0	0	0.536	0.536
PDGFRA	THY1	68415.ENSMMSP00000028382	68415.ENSMMSP00000020140	0	0	0	0	0.059	0	0	0.493	0.502
PDGFRA	SOX10	68415.ENSMMSP00000028382	68415.ENSMMSP00000022862	0	0	0	0	0.067	0	0	0.696	0.704
PDGFRA	RASAL3	68415.ENSMMSP00000028382	68415.ENSMMSP00000028157	0	0	0	0	0	0.247	0.467	0	0.581
PDIA2	TXNIP	68415.ENSMMSP00000006558	68415.ENSMMSP00000017485	0	0	0	0	0	0.187	0.384	0.074	0.495
PDIA2	SOX10	68415.ENSMMSP00000006558	68415.ENSMMSP00000022862	0	0	0	0	0	0.593	0	0	0.593
PDLIM3	TNNC1	68415.ENSMMSP00000025908	68415.ENSMMSP00000011988	0	0	0	0	0.068	0.116	0.116	0.318	0.436
PDLIM3	SDC4	68415.ENSMMSP00000025908	68415.ENSMMSP00000023184	0	0	0	0	0	0	0.49	0.073	0.507
PDLIM3	SVIL	68415.ENSMMSP00000025908	68415.ENSMMSP00000029575	0	0	0	0	0	0	0	0.457	0.457
PEG10	SLC38A4	68415.ENSMMSP00000023514	68415.ENSMMSP00000009532	0	0	0	0	0	0	0	0.493	0.493
PEG10	SGCE	68415.ENSMMSP00000023514	68415.ENSMMSP00000024334	0	0	0	0	0.57	0	0	0.75	0.887
PER2	PPARG	68415.ENSMMSP00000009550	68415.ENSMMSP00000020067	0	0	0	0	0	0.142	0.064	0.51	0.572
PGLYRP3	PLLP	68415.ENSMMSP00000001463	68415.ENSMMSP00000001046	0	0	0	0	0	0	0	0.472	0.472
PGLYRP3	PPARG	68415.ENSMMSP00000001463	68415.ENSMMSP00000020067	0	0	0	0	0	0	0	0.491	0.491
PIEZO2	SMARCA1	68415.ENSMMSP00000017977	68415.ENSMMSP00000009182	0	0	0	0	0.367	0.175	0	0	0.455
PIEZO2	TRPV2	68415.ENSMMSP00000017977	68415.ENSMMSP00000032767	0	0	0	0	0	0	0	0.466	0.465
PIK3C2G	UNC13C	68415.ENSMMSP00000029954	68415.ENSMMSP00000009119	0	0	0	0	0	0	0	0.513	0.513
PIK3C2G	PLCE1	68415.ENSMMSP00000029954	68415.ENSMMSP00000011929	0	0	0	0	0	0	0.863	0.069	0.867
PIK3C2G	PLCL1	68415.ENSMMSP00000029954	68415.ENSMMSP00000015305	0	0	0	0	0	0	0.541	0.293	0.661
PIK3C2G	TNS2	68415.ENSMMSP00000029954	68415.ENSMMSP00000030050	0	0	0	0	0	0	0.444	0.129	0.495
PIK3IP1	PPP1R3C	68415.ENSMMSP00000032956	68415.ENSMMSP00000015262	0	0	0	0	0	0	0	0.456	0.456
PLCE1	RRAS	68415.ENSMMSP00000011929	68415.ENSMMSP00000003462	0	0	0	0	0.058	0.249	0.827	0.044	0.867
PLCE1	RORB	68415.ENSMMSP00000011929	68415.ENSMMSP00000005458	0	0	0	0	0	0	0	0.485	0.485
PLCE1	SLC10A6	68415.ENSMMSP00000011929	68415.ENSMMSP00000021871	0	0	0	0	0	0	0	0.475	0.475
PLCE1	TNS2	68415.ENSMMSP00000011929	68415.ENSMMSP00000030050	0	0	0	0	0	0.042	0.501	0.062	0.512
PLCE1	REM1	68415.ENSMMSP00000011929	68415.ENSMMSP00000021019	0	0	0	0	0	0.243	0.046	0.458	0.574
PLCL1	RRAS	68415.ENSMMSP00000015305	68415.ENSMMSP00000003462	0	0	0	0	0	0.249	0.359	0	0.498
PLCL1	TRH	68415.ENSMMSP00000015305	68415.ENSMMSP00000032553	0	0	0	0	0	0	0.392	0.132	0.449
PLCL1	TNS2	68415.ENSMMSP00000015305	68415.ENSMMSP00000030050	0	0	0	0	0	0.042	0.501	0.062	0.512
PLXNA4	SEMA3E	68415.ENSMMSP00000021405	68415.ENSMMSP00000001955	0	0	0	0	0	0.349	0.601	0.555	0.874
PLXNA4	SEMA3D	68415.ENSMMSP00000021405	68415.ENSMMSP00000002031	0	0	0	0	0	0.349	0.262	0.494	0.735
PLXNA4	RRAS	68415.ENSMMSP00000021405	68415.ENSMMSP00000003462	0	0	0	0	0	0.238	0.366	0.318	0.641
PLXNA4	PLXNC1	68415.ENSMMSP00000021405	68415.ENSMMSP00000013362	0	0	0	0.656	0	0	0.876	0.121	0.886
PLXNA4	SHC3	68415.ENSMMSP00000021405	68415.ENSMMSP00000018413	0	0	0	0	0.096	0.074	0.353	0	0.411
PLXNA4	TNS2	68415.ENSMMSP00000021405	68415.ENSMMSP00000030050	0	0	0	0	0.059	0	0.6	0	0.607
PLXNC1	SEMA3E	68415.ENSMMSP00000013362	68415.ENSMMSP00000001955	0	0	0	0	0	0.349	0.601	0.607	0.889
PLXNC1	SEMA3D	68415.ENSMMSP00000013362	68415.ENSMMSP00000002031	0	0	0	0	0	0.349	0.262	0.219	0.592
PLXNC1	RRAS	68415.ENSMMSP00000013362	68415.ENSMMSP00000003462	0	0	0	0	0	0.238	0.366	0.507	0.741
PLXNC1	SHC3	68415.ENSMMSP00000013362	68415.ENSMMSP00000018413	0	0	0	0	0.096	0.074	0.353	0	0.411
PLXNC1	TNS2	68415.ENSMMSP00000013362	68415.ENSMMSP00000030050	0	0	0	0	0.059	0	0.6	0	0.607
PMEL	SLC24A5	68415.ENSMMSP00000018453	68415.ENSMMSP00000015476	0	0	0	0	0.293	0	0	0.204	0.413
PMEL	TF	68415.ENSMMSP00000018453	68415.ENSMMSP00000016134	0	0	0	0	0	0.204	0.478	0.067	0.578
PMEL	TG	68415.ENSMMSP00000018453	68415.ENSMMSP00000027162	0	0	0	0	0	0.204	0.478	0	0.566
PMEL	TERT	68415.ENSMMSP00000018453	68415.ENSMMSP00000024766	0	0	0	0	0	0	0	0.599	0.599
PMEL	TRPM1	68415.ENSMMSP00000018453	68415.ENSMMSP00000030760	0	0	0	0	0	0	0	0.603	0.603
PPARG	TCF4	68415.ENSMMSP00000020067	68415.ENSMMSP00000007913	0	0	0	0	0.067	0.144	0	0.527	0.589
PPARG	TLR2	68415.ENSMMSP00000020067	68415.ENSMMSP00000011847	0	0	0	0	0.071	0.088	0	0.457	0.499
PPP2R2B	RASGRP4	68415.ENSMMSP00000003455	68415.ENSMMSP00000004883	0	0	0	0	0.066	0.497	0	0.096	0.538
PROKR2	TRH	68415.ENSMMSP00000011960	68415.ENSMMSP00000032553	0	0	0	0	0	0	0.628	0.047	0.63
PRSS23	TGFB1I1	68415.ENSMMSP00000013140	68415.ENSMMSP00000003306	0	0	0	0	0.066	0	0	0.505	0.517
PTCHD1	SLC16A2	68415.ENSMMSP00000008091	68415.ENSMMSP00000001539	0	0	0	0	0	0	0	0.533	0.533
PTCHD1	SHANK2	68415.ENSMMSP00000008091	68415.ENSMMSP00000030491	0	0	0	0	0	0	0	0.456	0.456
PTPRD	ZDHHC14	68415.ENSMMSP00000001452	68415.ENSMMSP00000001290	0	0	0	0	0	0	0	0.518	0.518
PTPRD	RTN4R	68415.ENSMMSP00000001452	68415.ENSMMSP00000008211	0	0	0	0	0	0.237	0.105	0.194	0.401
PTPRD	SMARCA1	68415.ENSMMSP00000001452	68415.ENSMMSP00000009182	0	0	0	0	0.179	0.069	0	0.295	0.414
PTPRD	TNC	68415.ENSMMSP00000001452	68415.ENSMMSP00000019252	0	0	0	0.547	0	0.175	0.436	0.044	0.516
PTPRD	RBMS3	68415.ENSMMSP00000001452	68415.ENSMMSP00000029362	0	0	0	0	0	0	0	0.531	0.531
QPRT	SLC38A4	68415.ENSMMSP00000017773	68415.ENSMMSP00000009532	0	0	0	0	0	0	0.452	0.065	0.465
QPRT	TDRD7	68415.ENSMMSP00000017773	68415.ENSMMSP00000010742	0.1	0	0	0	0	0	0.506	0	0.536
QPRT	SLC32A1	68415.ENSMMSP00000017773	68415.ENSMMSP00000029112	0	0	0	0	0	0	0.452	0.065	0.465
QPRT	SLC38A5	68415.ENSMMSP00000017773	68415.ENSMMSP00000018761	0	0	0	0	0	0	0.452	0.065	0.465
RAB6B	RRAS	68415.ENSMMSP00000016046	68415.ENSMMSP00000003462	0	0	0.101	0.73	0	0.236	0.207	0.061	0.42
RAB6B	TRIM46	68415.ENSMMSP00000016046	68415.ENSMMSP00000011642	0	0	0	0	0	0	0	0.457	0.457
RASA3	REM1	68415.ENSMMSP00000002868	68415.ENSMMSP00000021019	0	0	0	0	0	0.123	0.518	0.065	0.57
RASA3	RASAL3	68415.ENSMMSP00000002868	68415.ENSMMSP00000028157	0	0	0	0.58	0	0.159	0.498	0.603	0.817
RASA3	RRAS	68415.ENSMMSP00000002868	68415.ENSMMSP00000003462	0	0	0	0	0	0.148	0.826	0.19	0.869
RASAL3	RRAS	68415.ENSMMSP00000028157	68415.ENSMMSP00000003462	0	0	0	0	0	0.242	0.826	0.113	0.872
RASAL3	RASGRP4	68415.ENSMMSP00000028157	68415.ENSMMSP00000004883	0	0	0	0	0	0.122	0.059	0.499	0.549
RASAL3	REM1	68415.ENSMMSP00000028157	68415.ENSMMSP00000021019	0	0	0	0	0	0.237	0.352	0.087	0.509
RASAL3	RASL12	68415.ENSMMSP00000028157	68415.ENSMMSP00000025687	0	0	0	0	0	0.237	0.311	0.084	0.476
RASGRP4	RRAS	68415.ENSMMSP00000004883	68415.ENSMMSP00000003462	0	0	0	0	0	0.543	0.826	0.113	0.923
RASGRP4	RASL12	68415.ENSMMSP00000004883	68415.ENSMMSP00000025687	0	0	0	0	0	0.248	0.251	0.12	0.461
RASGRP4	REM1	68415.ENSMMSP00000004883	68415.ENSMMSP00000021019	0	0	0	0	0	0.248	0.287	0.155	0.507
RASGRP4	SHC3	68415.ENSMMSP00000004883	68415.ENSMMSP00000018413	0	0	0	0	0	0.237	0.367	0.134	0.545
RASL12	SHANK2	68415.ENSMMSP00000025687	68415.ENSMMSP00000030491	0	0	0	0	0	0.415	0.045	0.049	0.422
REM1	SHC3	68415.ENSMMSP00000021019	68415.ENSMMSP00000018413	0	0	0	0	0	0	0.241	0.325	0.465
REM1	SHANK2	68415.ENSMMSP00000021019	68415.ENSMMSP00000030491	0	0	0	0	0	0.415	0.045	0.049	0.422
RGR	TRPM1	68415.ENSMMSP00000028154	68415.ENSMMSP00000030760	0	0	0	0	0	0	0	0.457	0.457
RGS11	TRPM1	68415.ENSMMSP00000006406	68415.ENSMMSP00000030760	0	0	0	0	0	0	0	0.916	0.916
RIMS3	SLC38A5	68415.ENSMMSP00000006500	68415.ENSMMSP00000018761	0	0	0	0	0.059	0	0.39	0	0.401
RIMS3	TC2N	68415.ENSMMSP00000006500	68415.ENSMMSP00000013770	0	0	0	0	0	0	0.375	0.083	0.402
RIMS3	SLC38A4	68415.ENSMMSP00000006500	68415.ENSMMSP00000009532	0	0	0	0	0.059	0	0.39	0.069	0.418
RIMS3	SLC29A4	68415.ENSMMSP00000006500	68415.ENSMMSP00000024405	0	0	0	0	0	0	0	0.582	0.582
RIMS3	SLC18A1	68415.ENSMMSP00000006500	68415.ENSMMSP00000008451	0	0	0	0	0	0	0.609	0.126	0.643
RIMS3	SLC32A1	68415.ENSMMSP00000006500	68415.ENSMMSP00000029112	0	0	0	0	0.089	0	0.635	0.187	0.706
RIMS3	UNC13C	68415.ENSMMSP00000006500	68415.ENSMMSP00000009119	0	0	0	0	0	0.657	0.617	0.242	0.891
RNF213	UBE2L6	68415.ENSMMSP00000030401	68415.ENSMMSP00000000152	0	0	0	0	0.101	0.915	0.063	0.133	0.929
RNF213	SAMD9	68415.ENSMMSP00000030401	68415.ENSMMSP00000025999	0	0	0	0	0.466	0.116	0.062	0.07	0.533
RORB	TRPC4	68415.ENSMMSP00000005458	68415.ENSMMSP00000022619	0	0	0	0	0	0	0.469	0.041	0.469
RORB	RORC	68415.ENSMMSP00000005458	68415.ENSMMSP00000021906	0	0	0.055	0.926	0	0.173	0.894	0.08	0.913
RPRM	TP73	68415.ENSMMSP00000006143	68415.ENSMMSP00000007168	0	0	0	0	0	0	0	0.472	0.472
RRAS	ZDHHC14	68415.ENSMMSP00000003462	68415.ENSMMSP00000001290	0	0	0	0	0	0.146	0.457	0.074	0.533
RRAS	SHANK2	68415.ENSMMSP00000003462	68415.ENSMMSP00000030491	0	0	0	0	0	0.415	0.045	0.049	0.422
RRAS	SHC3	68415.ENSMMSP00000003462	68415.ENSMMSP00000018413	0	0	0	0	0	0	0.456	0.062	0.467
RTN4R	TSPAN10	68415.ENSMMSP00000008211	68415.ENSMMSP00000031770	0	0	0	0	0	0	0	0.457	0.457
RYR3	ZDHHC2	68415.ENSMMSP00000016635	68415.ENSMMSP00000007795	0	0	0	0	0	0	0	0.457	0.457
RYR3	TNNC1	68415.ENSMMSP00000016635	68415.ENSMMSP00000011988	0	0	0	0	0	0.579	0.23	0.052	0.665
RYR3	SGSM1	68415.ENSMMSP00000016635	68415.ENSMMSP00000014597	0	0	0	0	0	0	0	0.456	0.456
SAMD9	UBE2L6	68415.ENSMMSP00000025999	68415.ENSMMSP00000000152	0	0	0	0	0.281	0.157	0.063	0.596	0.739
SCML4	TP73	68415.ENSMMSP00000012291	68415.ENSMMSP00000007168	0	0	0	0	0.044	0.124	0.458	0	0.506
SDC4	TGFB1I1	68415.ENSMMSP00000023184	68415.ENSMMSP00000003306	0	0	0	0	0	0	0.541	0.122	0.579
SDC4	THBS2	68415.ENSMMSP00000023184	68415.ENSMMSP00000005967	0	0	0	0	0	0	0.894	0.223	0.914
SDC4	TGFB2	68415.ENSMMSP00000023184	68415.ENSMMSP00000011967	0	0	0	0	0	0	0.456	0.048	0.459
SDC4	TNC	68415.ENSMMSP00000023184	68415.ENSMMSP00000019252	0	0	0	0	0	0	0.884	0.203	0.903
SDC4	THY1	68415.ENSMMSP00000023184	68415.ENSMMSP00000020140	0	0	0	0	0	0	0	0.476	0.476
SEMA3E	UNC5C	68415.ENSMMSP00000001955	68415.ENSMMSP00000026803	0	0	0	0	0	0	0	0.507	0.507
SFRP1	THY1	68415.ENSMMSP00000007082	68415.ENSMMSP00000020140	0	0	0	0	0.068	0	0	0.418	0.434
SFRP1	WNT7B	68415.ENSMMSP00000007082	68415.ENSMMSP00000031359	0	0	0	0	0	0.534	0.826	0.435	0.95
SFRP1	WNT16	68415.ENSMMSP00000007082	68415.ENSMMSP00000010639	0	0	0	0	0	0.534	0.847	0.394	0.953
SFRP1	WNT7A	68415.ENSMMSP00000007082	68415.ENSMMSP00000032212	0	0	0	0	0	0.534	0.826	0.539	0.959
SGCA	SSPN	68415.ENSMMSP00000033178	68415.ENSMMSP00000032206	0	0	0	0	0.123	0	0.999	0.731	0.999
SGCE	SLC38A4	68415.ENSMMSP00000024334	68415.ENSMMSP00000009532	0	0	0	0	0	0	0	0.599	0.599
SGCE	SSPN	68415.ENSMMSP00000024334	68415.ENSMMSP00000032206	0	0	0	0	0.123	0	0.999	0.587	0.999
SHC3	TENM1	68415.ENSMMSP00000018413	68415.ENSMMSP00000008849	0	0	0	0	0.066	0	0.464	0.073	0.495
SIAE	ST8SIA4	68415.ENSMMSP00000030458	68415.ENSMMSP00000005441	0	0	0	0	0	0	0	0.457	0.457
SIAE	TM6SF1	68415.ENSMMSP00000030458	68415.ENSMMSP00000029929	0	0	0	0	0	0	0	0.536	0.536
SIAE	ST8SIA1	68415.ENSMMSP00000030458	68415.ENSMMSP00000031578	0	0	0	0	0	0	0	0.472	0.472
SLC10A6	SLCO3A1	68415.ENSMMSP00000021871	68415.ENSMMSP00000017579	0	0	0	0	0	0	0	0.6	0.6
SLC16A2	SLC43A1	68415.ENSMMSP00000001539	68415.ENSMMSP00000000225	0	0	0	0	0	0	0	0.498	0.497
SLC16A2	SLCO3A1	68415.ENSMMSP00000001539	68415.ENSMMSP00000017579	0	0	0	0	0	0	0.219	0.328	0.452
SLC16A2	SLC1A6	68415.ENSMMSP00000001539	68415.ENSMMSP00000027197	0	0	0	0	0	0	0	0.465	0.465
SLC18A1	TC2N	68415.ENSMMSP00000008451	68415.ENSMMSP00000013770	0	0	0	0	0	0	0.465	0.078	0.485
SLC18A1	UNC13C	68415.ENSMMSP00000008451	68415.ENSMMSP00000009119	0	0	0	0	0	0	0.616	0.184	0.673
SLC18A1	SLC32A1	68415.ENSMMSP00000008451	68415.ENSMMSP00000029112	0	0	0	0	0	0	0.884	0.329	0.918
SLC1A6	SLC43A1	68415.ENSMMSP00000027197	68415.ENSMMSP00000000225	0	0	0	0	0	0.075	0	0.456	0.475
SLC1A6	SLC6A17	68415.ENSMMSP00000027197	68415.ENSMMSP00000006429	0.047	0	0	0	0	0	0.296	0.334	0.514
SLC1A6	SLC38A4	68415.ENSMMSP00000027197	68415.ENSMMSP00000009532	0	0	0	0	0	0.066	0	0.603	0.613
SLC1A6	SLC38A5	68415.ENSMMSP00000027197	68415.ENSMMSP00000018761	0	0	0	0	0	0.066	0	0.552	0.563
SLC24A5	TYR	68415.ENSMMSP00000015476	68415.ENSMMSP00000012485	0	0	0	0	0.32	0	0	0.764	0.832
SLC24A5	TSPAN10	68415.ENSMMSP00000015476	68415.ENSMMSP00000031770	0	0	0	0	0.355	0	0	0.238	0.487
SLC24A5	SLC8A1	68415.ENSMMSP00000015476	68415.ENSMMSP00000016966	0	0	0	0.564	0.047	0	0.489	0.16	0.555
SLC24A5	TRPM1	68415.ENSMMSP00000015476	68415.ENSMMSP00000030760	0	0	0	0	0	0	0	0.674	0.674
SLC24A5	SLC45A2	68415.ENSMMSP00000015476	68415.ENSMMSP00000020550	0	0	0	0	0.105	0	0	0.75	0.766
SLC32A1	TC2N	68415.ENSMMSP00000029112	68415.ENSMMSP00000013770	0	0	0	0	0.066	0	0.523	0.123	0.575
SLC38A4	SLC43A1	68415.ENSMMSP00000009532	68415.ENSMMSP00000000225	0	0	0	0	0	0	0	0.478	0.478
SLC38A4	SMOC1	68415.ENSMMSP00000009532	68415.ENSMMSP00000020725	0	0	0	0	0	0	0	0.626	0.626
SLC43A1	TNC	68415.ENSMMSP00000000225	68415.ENSMMSP00000019252	0	0	0	0	0	0.442	0.306	0	0.596
SLC45A2	TYR	68415.ENSMMSP00000020550	68415.ENSMMSP00000012485	0	0	0	0	0.276	0	0	0.769	0.825
SLC45A2	TRPM1	68415.ENSMMSP00000020550	68415.ENSMMSP00000030760	0	0	0	0	0.066	0	0	0.484	0.497
SLIT2	UNC5C	68415.ENSMMSP00000021936	68415.ENSMMSP00000026803	0	0	0	0	0.083	0.236	0	0.509	0.625
SOX10	TYR	68415.ENSMMSP00000022862	68415.ENSMMSP00000012485	0	0	0	0	0	0.069	0	0.735	0.742
SPON2	TOX	68415.ENSMMSP00000014019	68415.ENSMMSP00000023671	0	0	0	0	0	0	0	0.519	0.519
ST3GAL6	ST8SIA1	68415.ENSMMSP00000005224	68415.ENSMMSP00000031578	0	0	0	0.57	0	0	0.884	0.599	0.951
ST8SIA4	TOX	68415.ENSMMSP00000005441	68415.ENSMMSP00000023671	0	0	0	0	0	0	0	0.591	0.591
STARD13	TNS2	68415.ENSMMSP00000000007	68415.ENSMMSP00000030050	0	0	0	0	0	0.722	0	0.111	0.742
STPG1	TRIM15	68415.ENSMMSP00000009897	68415.ENSMMSP00000008213	0	0	0	0	0	0	0	0.457	0.457
TC2N	UNC13C	68415.ENSMMSP00000013770	68415.ENSMMSP00000009119	0	0	0	0	0.043	0	0.451	0.12	0.497
TCF4	TLE2	68415.ENSMMSP00000007913	68415.ENSMMSP00000000930	0	0	0	0	0.067	0.164	0.814	0.044	0.842
TERT	TLE2	68415.ENSMMSP00000024766	68415.ENSMMSP00000000930	0	0	0	0	0	0	0.607	0.05	0.61
TERT	ZDHHC14	68415.ENSMMSP00000024766	68415.ENSMMSP00000001290	0	0	0	0	0	0.074	0.47	0.144	0.543
TERT	ZDHHC1	68415.ENSMMSP00000024766	68415.ENSMMSP00000002152	0	0	0	0	0	0.074	0.47	0.144	0.543
TG	TRH	68415.ENSMMSP00000027162	68415.ENSMMSP00000032553	0	0	0	0	0	0	0	0.456	0.456
TGFB1I1	TRIM38	68415.ENSMMSP00000003306	68415.ENSMMSP00000014651	0	0	0	0	0	0.068	0	0.457	0.472
TGFB1I1	ZBTB16	68415.ENSMMSP00000003306	68415.ENSMMSP00000028716	0	0	0	0	0	0.064	0	0.463	0.475
TGFB2	THBS2	68415.ENSMMSP00000011967	68415.ENSMMSP00000005967	0	0	0	0	0	0.083	0.478	0.293	0.632
TGFB2	TGFBI	68415.ENSMMSP00000011967	68415.ENSMMSP00000007461	0	0	0	0	0	0	0	0.457	0.457
TGFB2	TNFRSF11B	68415.ENSMMSP00000011967	68415.ENSMMSP00000010160	0	0	0	0	0	0	0	0.743	0.743
TGFBI	TNFRSF11B	68415.ENSMMSP00000007461	68415.ENSMMSP00000010160	0	0	0	0	0	0	0	0.466	0.465
THBS2	TNC	68415.ENSMMSP00000005967	68415.ENSMMSP00000019252	0	0	0	0	0.143	0.13	0.348	0.048	0.475
THY1	ZBTB16	68415.ENSMMSP00000020140	68415.ENSMMSP00000028716	0	0	0	0	0	0	0	0.742	0.742
TLR2	TLR3	68415.ENSMMSP00000011847	68415.ENSMMSP00000026954	0	0	0	0.578	0.066	0.043	0.488	0.632	0.809
TNC	TYR	68415.ENSMMSP00000019252	68415.ENSMMSP00000012485	0	0	0	0	0	0.13	0.348	0.043	0.409
TNFRSF11B	TNFSF10	68415.ENSMMSP00000010160	68415.ENSMMSP00000005166	0	0	0	0	0	0	0.542	0.731	0.871
TNS2	TP73	68415.ENSMMSP00000030050	68415.ENSMMSP00000007168	0	0	0	0	0.057	0.235	0.444	0.135	0.606
TNS2	USP28	68415.ENSMMSP00000030050	68415.ENSMMSP00000029138	0	0	0	0	0.068	0.193	0.474	0.118	0.604
TP73	USP28	68415.ENSMMSP00000007168	68415.ENSMMSP00000029138	0	0	0	0	0	0.248	0.469	0.067	0.594
TRIM15	UBE2L6	68415.ENSMMSP00000008213	68415.ENSMMSP00000000152	0	0	0	0	0	0.208	0.371	0.072	0.497
TRIM38	UBE2L6	68415.ENSMMSP00000014651	68415.ENSMMSP00000000152	0	0	0	0	0	0.208	0.478	0.066	0.58
TRIM46	UBE2L6	68415.ENSMMSP00000011642	68415.ENSMMSP00000000152	0	0	0	0	0	0.208	0.371	0.067	0.494
TRPC4	TRPV2	68415.ENSMMSP00000022619	68415.ENSMMSP00000032767	0	0	0	0	0	0	0.218	0.689	0.746
TRPM1	TYR	68415.ENSMMSP00000030760	68415.ENSMMSP00000012485	0	0	0	0	0.214	0	0	0.65	0.713
TRPM1	TRPV2	68415.ENSMMSP00000030760	68415.ENSMMSP00000032767	0	0	0	0	0.046	0	0.37	0.321	0.556
TSHZ2	ZNF652	68415.ENSMMSP00000019842	68415.ENSMMSP00000033226	0	0	0	0	0	0	0	0.601	0.601
TSHZ2	ZFP64	68415.ENSMMSP00000019842	68415.ENSMMSP00000020037	0	0	0	0	0	0	0	0.601	0.601
TSPAN1	TSPAN10	68415.ENSMMSP00000005810	68415.ENSMMSP00000031770	0	0	0	0.608	0	0	0	0.452	0.452
WNT16	WNT7A	68415.ENSMMSP00000010639	68415.ENSMMSP00000032212	0	0	0	0.915	0	0.065	0.632	0.078	0.655
WNT16	WNT7B	68415.ENSMMSP00000010639	68415.ENSMMSP00000031359	0	0	0	0.921	0	0.065	0.632	0.078	0.655
