# Supplementary material for: Identification of Potential miRNA–mRNA Regulatory Network Associated with Growth and Development of Hair Follicles in Forest Musk Deer
Source: Animals (Basel). 2023 Dec 15;13(24):3869. doi: 10.3390/ani13243869 (PMC10740511; doi:10.3390/ani13243869)
Supplement: Supplementary file 1 [file animals-13-03869-s001.zip › Supplementary Table S8.xlsx]

## Sheet: Sheet1
Supplementary Table S8 Summary of HF miRNAome data at anagen stage and catagen stage in the FMD
Group	sample	Paired-end raw reads	Paired-end clean reads	Total Bases (Gb)	error_rate(%)	% of clean reads	GC_content(%)
Catagen stage	AWHF1M	12284776	11641573	0.614	0.01	94.76	51.27
	AWHF2M	11926100	11076571	0.596	0.01	92.88	51.45
	CWHF2M	12664254	11410814	0.633	0.01	90.1	49.39
Anagen stage	CBHF3F	12242114	11439313	0.612	0.01	93.44	50.02
	CBHF4F	10943901	10240675	0.547	0.01	93.57	49.13
	CBHF6F	11301778	9980348	0.565	0.01	88.31	48.86
	CBHF5M	11381726	10412116	0.569	0.01	91.48	49.07
	CBHF8M	11969394	10671356	0.598	0.01	89.16	49.42
	CBHF9M	12361815	10931312	0.618	0.01	88.43	49.1
	CBHF10M	12579867	11148400	0.629	0.01	88.62	49.53
	Tatol	119655725	108952478	5.981		91.075
