# Supplementary material for: Identification of Potential miRNA–mRNA Regulatory Network Associated with Growth and Development of Hair Follicles in Forest Musk Deer
Source: Animals (Basel). 2023 Dec 15;13(24):3869. doi: 10.3390/ani13243869 (PMC10740511; doi:10.3390/ani13243869)
Supplement: Supplementary file 1 [file animals-13-03869-s001.zip › Supplementary Table S9.xlsx]

## Sheet: Sheet1
Supplementary Table S9 Statistical information of small RNAs mapping to reference sequence at anagen stage and catagen stage in the FMD
Group	Sample name	Total sRNA	Total bases (Gp)	Mapped sRNA	Mapped of sRNA(%)	Mapped uniquely sRNA	uniquely sRNA reads
Catagen stage	AWHF1M	11166761	289.67	10035155	89.87	621259	16111531
	AWHF2M	9900075	247.61	8882540	89.72	685827	17438135
	CWHF2M	10771648	261.8	10063173	93.42	508069	12794410
Anagen stage	CBHF3F	9923881	229.55	9311794	93.83	536243	12798108
	CBHF4F	9368992	212.84	8952062	95.55	376363	8806513
	CBHF6F	9562782	231.98	9093939	95.1	360982	9144716
	CBHF5M	9299015	211.12	8939522	96.13	345803	8052698
	CBHF8M	8831591	200.94	8439950	95.57	374487	8709262
	CBHF9M	9186389	209.77	8817473	95.98	354809	8314553
	CBHF10M	10773236	271.66	9930440	92.18	525610	13538598
