# Supplementary material for: Identification of Potential miRNA–mRNA Regulatory Network Associated with Growth and Development of Hair Follicles in Forest Musk Deer
Source: Animals (Basel). 2023 Dec 15;13(24):3869. doi: 10.3390/ani13243869 (PMC10740511; doi:10.3390/ani13243869)
Supplement: Supplementary file 1 [file animals-13-03869-s001.zip › Supplementary Table S10.xlsx]

## Sheet: Sheet1
Supplementary Table S10 Alignment and annotation of small RNA with various types of RNA in HFs of FMD at the anagen stage and catagen stage
	Catagen stage						Anagen stage
	AWHF1M		AWHF2M		CWHF2M		CBHF10M		CBHF3F		CBHF4F		CBHF5M		CBHF6F		CBHF8M		CBHF9M
Types	Count	Percent (%)	Count	Percent (%)	Count	Percent (%)	Count	Percent (%)	Count	Percent (%)	Count	Percent (%)	Count	Percent (%)	Count	Percent (%)	Count	Percent (%)	Count	Percent (%)
known miRNA	2083932	20.77	1906246	21.46	2924119	29.06	3441293	34.65	3177297	34.12	3577987	39.97	2852407	31.91	3370380	37.06	2953411	34.99	3438963	39
rRNA	2290974	22.83	2294677	25.83	1661659	16.51	1861576	18.75	1765500	18.96	1042412	11.64	983288	11	885390	9.74	1318866	15.63	1067789	12.11
tRNA	2255345	22.47	1543838	17.38	1303351	12.95	1827537	18.4	772651	8.3	540730	6.04	603508	6.75	1304959	14.35	586842	6.95	598003	6.78
snRNA	8978	0.09	8599	0.1	7920	0.08	8100	0.08	7897	0.08	5484	0.06	4966	0.06	4351	0.05	6049	0.07	5154	0.06
snoRNA	300044	2.99	120630	1.36	214126	2.13	189479	1.91	124571	1.34	97179	1.09	113053	1.26	138614	1.52	80171	0.95	86985	0.99
repeat_seq	121781	1.21	100211	1.13	88494	0.88	91909	0.93	92817	1	62822	0.7	69163	0.77	52662	0.58	70248	0.83	62618	0.71
novel miRNA	137925	1.37	210155	2.37	252111	2.51	250891	2.53	313470	3.37	330746	3.69	268543	3	308397	3.39	308962	3.66	317994	3.61
exon	138112	1.37	119043	1.34	84470	0.84	116752	1.17	100789	1.08	46959	0.53	49090	0.55	55291	0.61	64439	0.76	52043	0.59
intron	1416420	14.11	817708	9.2	2075648	20.62	1018416	10.26	1723029	18.51	2022557	22.59	2886298	32.28	1858314	20.43	1997448	23.67	2117377	24.01
other	1281644	12.77	1761433	19.83	1451275	14.42	1124487	11.32	1233773	13.25	1225186	13.69	1109206	12.41	1115581	12.27	1053514	12.48	1070547	12.14
total	10035155	100	8882540	100	10063173	100	9930440	100	9311794	100	8952062	100	8939522	100	9093939	100	8439950	100	8817473	100

## Sheet: Sheet3
Supplementary File 9 Alignment and annotation of small RNA with various types of RNA in hair follicle tissues at the anagen stage and catagen stage
Types	Percent (%)	Percent (%)	Percent (%)	Percent (%)	Percent (%)	Percent (%)	Percent (%)	Percent (%)	Percent (%)	Percent (%)
known miRNA	20.77	21.46	29.06	34.65	34.12	39.97	31.91	37.06	34.99	39
rRNA	22.83	25.83	16.51	18.75	18.96	11.64	11	9.74	15.63	12.11
tRNA	22.47	17.38	12.95	18.4	8.3	6.04	6.75	14.35	6.95	6.78
snRNA	0.09	0.1	0.08	0.08	0.08	0.06	0.06	0.05	0.07	0.06
snoRNA	2.99	1.36	2.13	1.91	1.34	1.09	1.26	1.52	0.95	0.99
repeat_seq	1.21	1.13	0.88	0.93	1	0.7	0.77	0.58	0.83	0.71
novel miRNA	1.37	2.37	2.51	2.53	3.37	3.69	3	3.39	3.66	3.61
exon	1.37	1.34	0.84	1.17	1.08	0.53	0.55	0.61	0.76	0.59
intron	14.11	9.2	20.62	10.26	18.51	22.59	32.28	20.43	23.67	24.01
other	12.77	19.83	14.42	11.32	13.25	13.69	12.41	12.27	12.48	12.14
total	100	100	100	100	100	100	100	100	100	100
