# Supplementary material for: Identification of Potential miRNA–mRNA Regulatory Network Associated with Growth and Development of Hair Follicles in Forest Musk Deer
Source: Animals (Basel). 2023 Dec 15;13(24):3869. doi: 10.3390/ani13243869 (PMC10740511; doi:10.3390/ani13243869)
Supplement: Supplementary file 1 [file animals-13-03869-s001.zip › Supplementary Table S11.xlsx]

## Sheet: miRNAs
Supplementary Table S11 Identification of known miRNAs and novel miRNAs in the HFs of FMD at anagen stage and catagen stage
miRNA at Anagen stage	miRNA at Catagen stage	miRNA at Anagen stage	miRNA at Catagen stage
miR-1263	miR-4-5p	novel_1	novel_1
miR-194b	miR-1263	novel_103	novel_103
miR-210-5p	miR-128-1-5p	novel_104	novel_104
miR-6522	miR-653-5p	novel_110	novel_110
miR-599-5p	miR-8549	novel_120	novel_120
miR-4646-5p	miR-1246	novel_129	novel_129
miR-2284o	miR-31b	novel_130	novel_130
miR-582	miR-194b	novel_132	novel_132
miR-666-5p	miR-507b	novel_135	novel_135
miR-1731-5p	miR-651-5p	novel_138	novel_138
miR-11274-5p	miR-46-3p	novel_143	novel_143
miR-2328-5p	miR-1343-5p	novel_163	novel_163
miR-216-5p	miR-302d-5p	novel_171	novel_171
miR-431-3p	miR-29b-5p	novel_181	novel_181
miR-126-5p	miR-450a	novel_183	novel_183
miR-431	miR-2285ae	novel_188	novel_188
miR-126b-5p	miR-194b-5p	novel_190	novel_190
miR-2285bw	miR-154a-3p	novel_192	novel_192
miR-212-3p	miR-105a	novel_200	novel_200
miR-512-5p	miR-15a	novel_209	novel_211
miR-215-3p	miR-34b-5p	novel_211	novel_214
miR-34b	miR-200-5p	novel_214	novel_222
miR-367	miR-148a-5p	novel_218	novel_228
miR-296-3p	miR-4646-5p	novel_221	novel_229
miR-296-5p	miR-153-3p	novel_222	novel_233
miR-222a-5p	miR-26a-3p	novel_228	novel_250
miR-2970-5p	miR-141-5p	novel_229	novel_277
miR-363-5p	miR-2370-5p	novel_23	novel_281
miR-1388	miR-302a-5p	novel_233	novel_286
miR-130b-3p	miR-342-5p	novel_247	novel_291
miR-2188-5p	miR-675a	novel_250	novel_292
miR-132-5p	miR-12301-5p	novel_254	novel_293
miR-1559-5p	miR-30g	novel_256	novel_296
miR-1388-3p	miR-217	novel_259	novel_302
miR-183-5p	miR-2970-5p	novel_272	novel_311
miR-106a-5p	miR-1304	novel_275	novel_314
miR-219b	miR-1451-5p	novel_276	novel_318
miR-4521	miR-421-5p	novel_277	novel_322
miR-222b-5p	miR-497b	novel_279	novel_332
miR-1729-5p	miR-12010	novel_280	novel_342
miR-191-3p	miR-9811-5p	novel_281	novel_343
miR-145-5p	miR-9851-5p	novel_284	novel_345
miR-1662-5p	miR-135b-2-3p	novel_285	novel_349
miR-458-3p	miR-383-5p	novel_286	novel_356
miR-148a-5p	miR-130a-1-5p	novel_287	novel_364
miR-8549	miR-10400-5p	novel_288	novel_384
miR-29c-5p	miR-92c-3p	novel_290	novel_387
miR-181b-5p	miR-370-5p	novel_291	novel_394
miR-29b-5p	miR-725	novel_292	novel_395
miR-11-5p	miR-2314	novel_293	novel_398
miR-874-5p	miR-23b-5p	novel_296	novel_399
miR-278-5p	miR-4521	novel_302	novel_407
miR-376c-5p	miR-6329	novel_304	novel_410
miR-5456	miR-195-5p	novel_311	novel_413
miR-11980	miR-1224-5p	novel_314	novel_416
miR-1416-5p	miR-215-3p	novel_318	novel_417
miR-196a-3p	miR-17a-5p	novel_321	novel_419
miR-2284h-5p	miR-148b-5p	novel_322	novel_420
miR-3133	miR-584	novel_332	novel_427
miR-329-2-5p	miR-2285bg	novel_342	novel_429
miR-9222	miR-380-3p	novel_343	novel_434
miR-184-5p	miR-376c	novel_344	novel_445
miR-1451-5p	miR-210-5p	novel_345	novel_448
miR-194-3p	miR-145-3p	novel_349	novel_45
miR-137	miR-214-3p	novel_356	novel_451
miR-23b-5p	miR-3956	novel_359	novel_456
miR-10001-5p	miR-874-5p	novel_361	novel_466
miR-150	miR-329-3p	novel_364	novel_47
miR-9851-5p	miR-132-5p	novel_365	novel_471
miR-455-3p	miR-4429	novel_373	novel_474
miR-9b	miR-143-5p	novel_382	novel_475
miR-92a-2-5p	miR-582	novel_384	novel_481
miR-460a-5p	miR-124a	novel_387	novel_493
miR-275-5p	miR-184-5p	novel_392	novel_494
miR-1635	miR-146a-5p	novel_394	novel_496
miR-2940-5p	miR-224	novel_395	novel_498
miR-27a-5p	miR-124a-5p	novel_398	novel_499
miR-582-5p	let-7d	novel_399	novel_504
miR-130a-1-5p	miR-2285de	novel_40	novel_512
miR-92c-3p	miR-1197	novel_407	novel_514
miR-460-5p	miR-2285bt	novel_410	novel_522
miR-46-3p	miR-9-5p	novel_412	novel_528
miR-2285be	miR-3074-5p	novel_413	novel_534
miR-31a-5p	miR-1729-5p	novel_415	novel_537
miR-103a-1-5p	miR-451-5p	novel_416	novel_538
miR-34b-5p	miR-485-3p	novel_417	novel_540
miR-316-5p	miR-144-5p	novel_419	novel_544
miR-139-5p	miR-2765	novel_420	novel_546
miR-137b-3p	miR-101-5p	novel_422	novel_548
miR-10465-2-3p	miR-147-5p	novel_427	novel_552
miR-502-5p	miR-31	novel_429	novel_559
miR-307	miR-449a	novel_434	novel_561
miR-497b	miR-34b-3p	novel_436	novel_562
miR-103-2-5p	miR-279d	novel_439	novel_566
miR-133b-5p	miR-9b	novel_440	novel_576
miR-1185-1-3p	miR-450b-3p	novel_443	novel_581
miR-252	miR-199b	novel_445	novel_582
miR-252b-5p	miR-275-5p	novel_448	novel_590
miR-676	miR-11-5p	novel_449	novel_592
miR-376d-5p	miR-450c	novel_45	novel_595
miR-18b-5p	miR-876-5p	novel_451	novel_597
miR-513a	miR-338-5p	novel_455	novel_60
miR-13a-5p	miR-369-5p	novel_456	novel_602
miR-22a-5p	miR-19b-2-5p	novel_466	novel_607
miR-10	miR-3085-5p	novel_467	novel_613
miR-3786-5p	miR-299b-5p	novel_468	novel_616
miR-252a	miR-105b-3p	novel_47	novel_621
miR-457a	miR-369	novel_471	novel_622
miR-252b	miR-34c	novel_473	novel_623
miR-6539	miR-3477-5p	novel_474	novel_656
miR-656	miR-196a-3p	novel_475	novel_669
miR-876-5p	miR-101-2-5p	novel_481	novel_67
miR-151	miR-263a	novel_493	novel_73
miR-1981-5p	miR-9b-5p	novel_494	novel_84
miR-302a-5p	miR-196b-5p	novel_496	novel_85
miR-302a	miR-219-2-3p	novel_498	novel_218
miR-302a-3p	miR-965-3p	novel_499	novel_221
miR-139-3p	miR-281-5p	novel_504	novel_230
miR-302e	miR-329-2-5p	novel_505	novel_259
miR-302c	miR-200a-3p	novel_511	novel_279
miR-302d-3p	miR-101-1-5p	novel_512	novel_288
miR-154	miR-411a-3p	novel_514	novel_321
miR-516b	miR-467a-5p	novel_516	novel_344
miR-4497	miR-9c-5p	novel_525	novel_382
miR-252-5p	miR-2404	novel_528	novel_412
miR-2428	miR-1175-5p	novel_534	novel_436
miR-190a-3p	miR-2a	novel_535	novel_439
miR-252a-5p	miR-3958-5p	novel_537	novel_443
miR-2a	miR-19a-5p	novel_538	novel_449
miR-187-5p	miR-79-5p	novel_540	novel_516
miR-22-5p	miR-9e-5p	novel_541	novel_525
miR-10b-3p	miR-873-5p	novel_542	novel_535
miR-6501-5p	miR-351-5p	novel_543	novel_579
miR-2285at	miR-2940-5p	novel_544	novel_627
miR-195-5p	miR-234	novel_546	novel_633
miR-281-3p	miR-431	novel_548	novel_647
miR-2284b	miR-299	novel_552	novel_652
miR-421-5p	miR-10b-3p	novel_553	novel_668
miR-203-5p	miR-126b	novel_559	novel_671
miR-934	miR-449a-5p	novel_561	novel_209
miR-514a	miR-199-3-3p	novel_562	novel_256
miR-927a-5p	miR-196b	novel_566	novel_276
miR-465d-5p	miR-2285bw	novel_571	novel_287
miR-577-5p	miR-199b-5p	novel_574	novel_290
miR-509	miR-100-3p	novel_576	novel_33
miR-2341	miR-629	novel_579	novel_361
miR-126b-3p	miR-9c	novel_581	novel_365
miR-514a-5p	miR-379-3p	novel_582	novel_373
miR-1251	miR-134	novel_586	novel_422
miR-87	miR-203b-5p	novel_590	novel_440
miR-483	miR-301b-5p	novel_591	novel_468
miR-192	miR-1468-5p	novel_592	novel_586
miR-351-5p	miR-449	novel_595	novel_591
miR-218a-1-3p	miR-281-3p	novel_597	novel_606
miR-141-5p	miR-122-3p	novel_60
miR-513b	miR-193b	novel_602
miR-576-5p	miR-12001	novel_606
miR-541-5p	miR-18b	novel_607
miR-33b-5p	miR-8094	novel_616
miR-215-5p	miR-582-3p	novel_621
miR-124a-5p	miR-302c	novel_622
miR-449a	miR-2285ac	novel_623
miR-660	miR-458-3p	novel_627
miR-509a-5p	miR-2341	novel_629
miR-2355-5p	miR-24b-5p	novel_630
miR-136	miR-497-5p	novel_632
miR-345	miR-87	novel_633
miR-497-5p	miR-545-5p	novel_638
miR-188-3p	miR-455-5p	novel_639
miR-1c	miR-460-5p	novel_641
miR-618	miR-133b-5p	novel_643
miR-145-3p	miR-223-5p	novel_647
miR-181b	miR-316-5p	novel_652
miR-651-5p	miR-124-3p	novel_656
miR-22a-3p	miR-30c-3p	novel_659
miR-203b-5p	miR-4497	novel_660
miR-654	miR-434-5p	novel_665
miR-196c-5p	miR-195	novel_668
miR-135c	miR-374c-5p	novel_669
miR-217-5p	miR-130b-5p	novel_67
miR-10175-5p	miR-1271-5p	novel_671
miR-374a	miR-221-5p	novel_73
miR-190b	miR-217-5p	novel_84
miR-450b-3p	miR-363-5p	novel_85
miR-339b-5p	miR-190b
miR-1296-5p	miR-135a-3p
miR-21a-3p	miR-339b-5p
miR-330-5p	miR-1296-5p
miR-19b-1-5p	miR-21a-3p
miR-92d-3p	miR-296-3p
miR-181c-5p	miR-330-5p
miR-31-5p	miR-19b-1-5p
miR-9985	miR-92d-3p
let-7d-5p	miR-31-5p
miR-324-3p	miR-9985
let-7c-5p	let-7d-5p
miR-196a	miR-324-3p
miR-378a-3p	let-7c-5p
miR-21-5p	miR-196a
miR-27a	miR-378a-3p
miR-338-5p	miR-21-5p
miR-148a-3p	miR-27a
miR-92	miR-148a-3p
miR-193b	miR-92
miR-181a-2-3p	miR-125b-3p
miR-188	miR-188
miR-101-5p	miR-181c-5p
miR-505	miR-505
miR-21a-5p	miR-181b
miR-2779	miR-21a-5p
miR-499-5p	miR-2779
miR-16	miR-499-5p
miR-182	miR-16
miR-628-5p	miR-182
miR-329-3p	miR-628-5p
miR-21	miR-21
let-7e	let-7e
miR-98-5p	miR-98-5p
miR-362-3p	miR-362-3p
miR-127-5p	miR-127-5p
miR-192-5p	miR-192-5p
miR-31	miR-106b-5p
miR-106b-5p	miR-378a-5p
miR-653-5p	let-7-5p
miR-378a-5p	miR-423
let-7-5p	miR-17-5p
miR-423	miR-20a-5p
miR-17-5p	miR-30c
miR-20a-5p	miR-30d
miR-30c	miR-125b-5p
miR-30d	miR-769
miR-125b-5p	miR-25-5p
miR-146a-5p	miR-34
miR-769	miR-93
miR-25-5p	miR-181a-2-3p
miR-93	miR-30e-5p
miR-30e-5p	miR-100-5p
miR-100-5p	miR-196a-5p
miR-196a-5p	miR-10c-5p
miR-10c-5p	miR-142-5p
miR-142-5p	miR-139
miR-139	miR-221
miR-221	miR-146b-5p
miR-146b-5p	let-7g
let-7g	miR-3613a
miR-3613a	miR-25-3p
miR-25-3p	miR-1271-3p
miR-1271-3p	miR-145-5p
miR-147	miR-147
miR-361-3p	miR-361-3p
miR-378b	miR-378b
miR-138	miR-138
miR-383-5p	miR-22-3p
miR-22-3p	miR-99a
miR-99a	miR-491-5p
miR-491-5p	miR-205-5p
miR-8-5p	miR-10a-3p
miR-205-5p	miR-26b-5p
miR-10a-3p	miR-181d
miR-26b-5p	miR-155-5p
miR-181d	miR-4286
miR-155-5p	miR-24-3p
miR-4286	miR-2285at
miR-24-3p	miR-193b-3p
miR-193b-3p	miR-2285as
miR-2285as	miR-276-3p
miR-276-3p	miR-218b
miR-218b	miR-2285au
miR-2285au	miR-218a
miR-218a	miR-222-5p
miR-187	miR-187
miR-2285ar	miR-2285ar
miR-423-3p	miR-423-3p
miR-362-5p	miR-362-5p
miR-2285aw	miR-2285aw
let-7d	miR-150-5p
miR-150-5p	let-7b
let-7b	miR-15a-5p
miR-15a-5p	miR-10
miR-2285bg	miR-2285bf
miR-2285bf	miR-2285ba
miR-2285ba	miR-125a
miR-125a	miR-146b
miR-146b	miR-2285bb
miR-2285bm	miR-2285bm
miR-2285bo	miR-2285bo
miR-2285bn	miR-2285bn
miR-149	miR-149
miR-149-5p	miR-149-5p
miR-152-3p	miR-152-3p
miR-450b-5p	miR-450b-5p
miR-1306-5p	miR-1306-5p
miR-126-3p	miR-126-3p
miR-191	miR-191
miR-23a-5p	miR-23a-5p
miR-155	miR-155
miR-2285ad	miR-2285ad
miR-450c	miR-29b
miR-29b	miR-31b-5p
miR-2285ae	miR-1247-3p
miR-31b-5p	miR-192
miR-1247-3p	miR-1249
miR-1249	miR-30b-5p
miR-30b-5p	miR-200a
miR-200a	miR-205
miR-205	miR-27b-5p
miR-27b-5p	miR-29a-5p
miR-29a-5p	miR-203-5p
miR-200b-3p	miR-200b-3p
miR-361-5p	miR-361-5p
miR-6517	miR-6517
miR-101a	miR-101a
miR-186	miR-186
miR-200c-5p	miR-200c-5p
miR-194c-5p	miR-92b-3p
miR-152-5p	miR-194c-5p
miR-455-5p	miR-152-5p
miR-379	miR-379
miR-138b	miR-769-5p
miR-10a-5p	miR-138b
miR-204-3p	miR-10a-5p
miR-140-3p	miR-204-3p
let-7h	miR-140-3p
miR-181a-5p	let-7h
miR-7858	miR-181a-5p
miR-106a	miR-106a
miR-7859	miR-7859
miR-1247-5p	miR-1247-5p
miR-263a-5p	miR-263a-5p
miR-424-5p	miR-424-5p
miR-3970	miR-3970
miR-17	miR-17
miR-18b	miR-146b-3p
miR-146b-3p	miR-1468
miR-369-5p	miR-126a
miR-1468	miR-139-5p
miR-126a	miR-338-3p
miR-338-3p	miR-31-3p
miR-31-3p	miR-7-5p
miR-7-5p	miR-10-5p
miR-10-5p	miR-151
miR-3959-5p	miR-200b-5p
miR-412-5p	miR-7550-5p
miR-200b-5p	miR-365-1-5p
miR-195	miR-425-5p
miR-143-5p	miR-1388
miR-30c-3p	miR-93b
miR-7550-5p	miR-339-3p
miR-365-1-5p	miR-18b-5p
miR-425-5p	miR-188-3p
miR-93b	miR-30a-5p
miR-339-3p	let-7
miR-30a-5p	miR-194-5p
let-7	miR-29a-3p
miR-200-5p	miR-10-3p
miR-194-5p	miR-186-5p
miR-29a-3p	miR-302a-3p
miR-186-5p	miR-26a-2
miR-299b-5p	miR-181b-5p
miR-26a-2	miR-9993b-3p
miR-9993b-3p	miR-130a-3p
miR-130a-3p	miR-708
miR-708	miR-219-5p
miR-219-5p	miR-129b-5p
miR-129b-5p	miR-340
miR-340	miR-126
miR-126	miR-744-5p
miR-744-5p	miR-365a
miR-365a	miR-210
miR-301a	miR-34a
miR-34a	miR-409-3p
miR-409-3p	miR-151-3p
miR-151-3p	miR-103-3p
miR-103-3p	miR-24-1-5p
miR-24-1-5p	miR-200a-5p
miR-200a-5p	miR-125a-5p
miR-125a-5p	miR-138a
miR-138a	miR-199-3-5p
miR-199-3-5p	miR-26b
miR-26b	miR-214-5p
miR-214-5p	miR-100
miR-100	miR-15c-5p
miR-15c-5p	miR-24b
miR-24b	miR-125b-2-3p
miR-125b-2-3p	miR-2284d
miR-374c	miR-2284c
miR-450a	miR-1814
miR-2284d	miR-2284a
miR-1814	miR-30d-5p
miR-30d-5p	miR-11971
miR-221-5p	miR-103-5p
miR-11971	miR-302c-3p
miR-103-5p	miR-125a-3p
miR-302c-3p	miR-193b-5p
miR-125a-3p	miR-215-5p
miR-193b-5p	miR-874
miR-874	miR-148b
miR-148b	miR-370
miR-370	miR-499a
miR-499a	miR-500
miR-500	miR-378c
miR-378c	miR-378d
miR-378d	miR-10926
miR-10926	miR-2284x
miR-2284x	miR-503
miR-369	miR-185
miR-212-5p	miR-2284y
miR-503	miR-184
miR-185	miR-204
miR-2284y	miR-33a
miR-184	miR-877-5p
miR-204	miR-11985
miR-33a	miR-19b
miR-877-5p	miR-11989
miR-11985	miR-452-5p
miR-19b	miR-33b-3p
miR-11989	miR-7
miR-452-5p	miR-26a-5p
miR-33b-3p	miR-101
miR-7	miR-11992
miR-26a-5p	miR-99a-3p
miR-101	miR-11991
miR-11992	miR-1298
miR-99a-3p	miR-20b-5p
miR-11991	miR-129-5p
miR-1343-5p	miR-145
miR-1298	miR-371-5p
miR-451-5p	miR-143
miR-20b-5p	let-7a
miR-129-5p	miR-16c-5p
miR-145	miR-200b
miR-371-5p	let-7b-5p
miR-143	miR-455-3p
let-7a	let-7a-5p
miR-124-3p	miR-10175-5p
miR-15a	miR-7b
miR-200b	miR-29b-2-5p
let-7b-5p	miR-1296
let-7a-5p	miR-205c-3p
miR-7b	miR-1814c
miR-29b-2-5p	miR-130a
miR-1296	miR-423-5p
miR-283-5p	miR-33
miR-148b-5p	miR-99a-5p
miR-205c-3p	miR-345-5p
miR-1814c	miR-362
miR-130a	miR-1343-3p
miR-423-5p	miR-130b-3p
miR-33	miR-454-5p
miR-99a-5p	miR-2284aa
miR-345-5p	miR-1271
miR-362	miR-424-3p
miR-1343-3p	miR-190a-5p
miR-454-5p	miR-451
miR-2284aa	miR-95
miR-1271	miR-146a
miR-424-3p	miR-106b-3p
miR-190a-5p	miR-378e-3p
miR-101-2-5p	miR-4454
miR-451	miR-211
miR-95	miR-677
miR-146a	miR-7977
miR-106b-3p	miR-1842-5p
miR-378e-3p	miR-194
miR-196b-5p	miR-302a
miR-4454	miR-22a-3p
miR-211	miR-29c-5p
miR-210	miR-502-3p
miR-677	miR-126-5p
miR-7977	miR-34a-5p
miR-1842-5p	miR-532
miR-194	miR-760
miR-502-3p	miR-422a
miR-196b	let-7f
miR-3956	miR-20a
miR-34a-5p	let-7c
miR-532	miR-236
miR-760	miR-235-3p
miR-422a	miR-148b-3p
let-7f	miR-92b-5p
miR-20a	miR-30b
let-7c	miR-20b
miR-236	miR-203a-5p
miR-235-3p	miR-99b
miR-148b-3p	miR-140-5p
miR-92b-5p	miR-29a
miR-30b	miR-28c
miR-20b	miR-16b-5p
miR-203a-5p	miR-374b-5p
miR-99b	miR-135b-5p
miR-140-5p	miR-592
miR-29a	miR-199b-2-5p
miR-28c	miR-378g
miR-16b-5p	miR-378i
miR-374b-5p	miR-500a-5p
miR-135b-5p	miR-122-5p
miR-217	miR-5100
miR-592	miR-127-3p
miR-199b-2-5p	miR-671-3p
miR-9-5p	miR-128a-3p
miR-378g	miR-1-3p
miR-378i	miR-671-5p
miR-101-1-5p	miR-2428
miR-500a-5p	miR-1386
miR-122-5p	miR-23c
miR-5100	miR-30c-5p
miR-127-3p	miR-10a
miR-671-3p	miR-10b
miR-128a-3p	miR-132
miR-1-3p	miR-322-5p
miR-671-5p	miR-24c
miR-411a-3p	miR-196c-5p
miR-1386	miR-365-5p
miR-23c	miR-379-5p
miR-374c-5p	miR-142
miR-30c-5p	miR-127
miR-10a	miR-490-5p
miR-10b	miR-2887
miR-132	miR-411a-5p
miR-322-5p	miR-29c-3p
miR-24c	miR-199a
miR-1271-5p	miR-181a
miR-365-5p	miR-500b-5p
miR-206-3p	miR-339-5p
miR-379-5p	miR-542-3p
miR-382	miR-1839
miR-142	miR-93-5p
miR-127	miR-10d-5p
miR-142-3p	miR-450-3p
miR-2887	miR-1307-3p
miR-411a-5p	miR-374-5p
miR-29c-3p	miR-181e
miR-199a	miR-484
miR-181a	miR-2188-5p
miR-500b-5p	miR-15b
miR-339-5p	miR-106-5p
miR-12001	miR-33-5p
miR-542-3p	miR-10b-5p
miR-1839	miR-196
miR-93-5p	miR-204-5p
miR-10d-5p	miR-203b-3p
miR-450-3p	miR-92a
miR-1307-3p	miR-450-5p
miR-374-5p	miR-128a-5p
miR-181e	miR-222a-3p
miR-484	miR-183-5p
miR-15b	miR-652-5p
miR-106-5p	miR-130a-5p
miR-33-5p	miR-182-5p
miR-10b-5p	miR-146
miR-545-5p	miR-152
miR-196	miR-145a-5p
miR-204-5p	miR-194-2-3p
miR-432-5p	miR-1307
miR-203b-3p	miR-101c
miR-92a	miR-324-5p
miR-450-5p	miR-494-3p
miR-128a-5p	miR-331-5p
miR-222a-3p	miR-22-5p
miR-652-5p	miR-143-3p
miR-130a-5p	miR-532-3p
miR-182-5p	miR-96
miR-146	miR-92a-1-5p
miR-152	miR-215
miR-145a-5p	miR-3613-3p
miR-194-2-3p	miR-134-5p
miR-1307	miR-2904
miR-885	miR-10d
miR-101c	miR-486b
miR-324-5p	let-7l-5p
miR-494-3p	miR-431-3p
miR-331-5p	miR-133a-2-5p
miR-143-3p	miR-10c
miR-532-3p	miR-133a-3p
miR-96	miR-27a-5p
miR-9851-3p	miR-1388-5p
miR-92a-1-5p	miR-1559-5p
miR-215	miR-200c-3p
miR-3613-3p	miR-135a
miR-134-5p	miR-421-3p
miR-2904	miR-197-5p
miR-10d	miR-1260b
miR-486b	miR-26a-2-5p
miR-107-5p	let-7f-5p
let-7l-5p	miR-129a-5p
miR-133a-2-5p	miR-129b
miR-10c	miR-502b-5p
miR-133a-3p	miR-181a-3p
miR-263a	miR-205b-5p
miR-873-3p	miR-9226-5p
miR-1388-5p	miR-1306
miR-200c-3p	miR-1388-3p
miR-135a	miR-181b-3p
miR-421-3p	miR-19a-3p
miR-197-5p	miR-574-5p
miR-1260b	miR-218a-1-3p
miR-26a-2-5p	miR-218
let-7f-5p	miR-2483-5p
miR-129a-5p	miR-151b
miR-582-3p	miR-126a-5p
miR-129b	let-7j
miR-502b-5p	miR-193a-5p
miR-181a-3p	miR-16a-5p
miR-205b-5p	miR-503-5p
miR-9226-5p	miR-450c-5p
miR-1306	miR-135a-5p
miR-3477-5p	miR-25-3-5p
miR-181b-3p	miR-33-3p
miR-19a-3p	miR-6712-5p
miR-574-5p	miR-574-3p
miR-218	miR-130b
miR-224	miR-486
miR-2483-5p	miR-7b-5p
miR-151b	miR-374a
miR-126a-5p	miR-199-5p
let-7j	miR-331-3p
miR-378j	miR-193a-3p
miR-16a-5p	miR-34c-5p
miR-503-5p	miR-146c-5p
miR-450c-5p	miR-125
miR-135a-5p	miR-654-5p
miR-25-3-5p	miR-492
miR-33-3p	miR-224-5p
miR-574-3p	miR-106a-5p
miR-130b	miR-26a
miR-486	miR-32-5p
miR-7b-5p	miR-185-5p
miR-199-5p	miR-72-5p
miR-331-3p	miR-30b-3p
miR-193a-3p	miR-452
miR-34c-5p	miR-129-1-3p
miR-146c-5p	miR-187-3p
miR-199b-5p	miR-100b-5p
miR-125	miR-18a-5p
miR-654-5p	miR-758-3p
miR-224-5p	let-7i-5p
miR-26a	miR-2285dl-3p
miR-130b-5p	miR-133a-5p
miR-32-5p	miR-504
miR-185-5p	miR-125b
miR-299	miR-125c-5p
miR-72-5p	miR-1260
miR-30b-3p	miR-187-5p
miR-452	miR-6529-5p
miR-129-1-3p	miR-411b-5p
miR-187-3p	miR-486a-5p
miR-100b-5p	miR-22b
miR-18a-5p	miR-199a-5p
miR-758-3p	miR-320a-3p
let-7i-5p	miR-205b
miR-2285dl-3p	miR-24-2-5p
miR-133a-5p	miR-29d-5p
miR-504	miR-499
miR-125b	miR-3613
miR-125c-5p	miR-497
miR-1260	miR-133-3p
miR-6529-5p	miR-1224
miR-411b-5p	miR-2318
miR-486a-5p	miR-491
miR-22b	miR-26-3p
miR-199a-5p	miR-16b
miR-380-3p	miR-34c-3p
miR-320a-3p	miR-451a
miR-205b	miR-136-3p
miR-24-2-5p	miR-450a-5p
miR-29d-5p	miR-99b-5p
miR-499	miR-455
miR-485	miR-345-3p
miR-3613	miR-263
miR-497	miR-196c-3p
miR-133-3p	miR-26c
miR-193a-5p	miR-24b-3p
miR-1224	miR-6523a
miR-2318	miR-409a-3p
miR-491	miR-374b
miR-26-3p	miR-2285aj-5p
miR-16b	miR-382-5p
miR-34c-3p	miR-25
miR-451a	miR-335-3p
miR-487b	miR-10b-2-3p
miR-136-3p	miR-2387
miR-450a-5p	miR-8-3p
miR-99b-5p	miR-1842-3p
miR-493	miR-2285cs
miR-449a-5p	miR-411
miR-455	miR-219b
miR-345-3p	miR-2285db
miR-263	miR-2285dd
miR-196c-3p	miR-409a-5p
miR-26c	miR-2285bu
miR-24b-3p	miR-425
miR-6523a	miR-9-3p
miR-409a-3p	miR-542-5p
miR-283	miR-2285by
miR-374b	miR-122
miR-2285aj-5p	miR-421
miR-382-5p	miR-2285bz
miR-25	miR-26-3-3p
miR-335-3p	miR-2285cd
miR-10b-2-3p	miR-15b-3p
miR-2387	miR-23b
miR-1842-3p	miR-26b-3p
miR-2285cs	miR-2285cj
miR-411	miR-1307-5p
miR-2285db	miR-2285cl
miR-2285dd	miR-154b-5p
miR-409a-5p	miR-11986c
miR-2285bu	miR-3064-5p
miR-2285bt	miR-29b-3p
miR-425	miR-574
miR-9-3p	miR-20a-3p
miR-542-5p	miR-181c-3p
miR-31a	miR-423a
miR-2285by	miR-1306-3p
miR-122	miR-628
miR-421	miR-28-5p
miR-2285bz	miR-1
miR-26-3-3p	miR-454b
miR-2285cd	miR-10182-5p
miR-15b-3p	miR-194-3p
miR-23b	miR-301a-5p
miR-26b-3p	miR-1662-5p
miR-2285cj	miR-30f
miR-1307-5p	miR-191-5p
miR-2285cl	miR-323
miR-154b-5p	miR-183
miR-11986c	miR-129a
miR-29b-3p	miR-17-3p
miR-574	miR-9a
miR-20a-3p	miR-195-3p
miR-181c-3p	miR-27d-3p
miR-423a	miR-181b-2-3p
miR-1306-3p	miR-877
miR-628	miR-410
miR-28-5p	miR-1842
miR-1	miR-532-5p
miR-9b-5p	miR-24-5p
miR-454b	miR-429b
miR-10182-5p	miR-302e
miR-301a-5p	miR-409
miR-30f	miR-365-3p
miR-191-5p	miR-660-3p
miR-323	miR-7a
miR-183	miR-107
miR-129a	miR-10172-5p
miR-17-3p	miR-502a
miR-9a	miR-301b-3p
miR-195-3p	miR-1249-5p
miR-27d-3p	miR-30e
miR-181b-2-3p	miR-205a-5p
miR-877	miR-15b-5p
miR-410	miR-18
miR-1842	miR-375
miR-532-5p	miR-20
miR-24-5p	miR-3432a
miR-429b	miR-429
miR-409	miR-23a
miR-365-3p	miR-326
miR-660-3p	miR-3431-5p
miR-7a	miR-615-5p
miR-107	miR-365-2-5p
miR-10172-5p	miR-150
miR-502a	miR-495
miR-301b-3p	miR-4791
miR-1249-5p	miR-135-5p
miR-124a	miR-375-3p
miR-30e	miR-99b-3p
miR-205a-5p	miR-203-3p
miR-15b-5p	miR-138-1-3p
miR-18	miR-106
miR-375	miR-101b
miR-20	miR-106b
miR-3432a	miR-302d-3p
miR-429	miR-335-5p
miR-23a	miR-181c
miR-326	miR-296-5p
miR-3431-5p	miR-543-3p
miR-365-2-5p	miR-252a-5p
miR-495	miR-8-5p
miR-301b-5p	miR-136
miR-4791	miR-252-5p
miR-17a-5p	miR-305-5p
miR-135-5p	miR-7858
miR-375-3p	miR-153-2-5p
miR-99b-3p	miR-412-5p
miR-203-3p	miR-374c
miR-138-1-3p	miR-2284o
miR-106	miR-2284r
miR-101b	miR-144-3p
miR-449	miR-221-3p
miR-106b	miR-283-5p
miR-335-5p	miR-139-3p
miR-181c	miR-315-5p
miR-5701	miR-206-3p
miR-306-5p	miR-382
miR-501-5p	miR-142-3p
miR-279a	miR-306-5p
miR-34	bantam
miR-2285am-5p	miR-144
miR-376a	miR-71-5p
miR-275-3p	miR-432-5p
bantam	miR-885
miR-8094	miR-275-3p
miR-26a-3p	miR-9851-3p
miR-376a-5p	miR-873-3p
miR-2796	miR-92a-3p
miR-145b	miR-760-5p
miR-315	miR-590-5p
miR-21c	miR-315
miR-374b-3p	miR-485
miR-8-3p	miR-487b
miR-24b-5p	miR-320a-5p
miR-2284a	miR-493
miR-71-5p	miR-283
miR-305-5p	miR-345
miR-2314	miR-31a
miR-873-5p	miR-71-3p
miR-147-5p	miR-135a-2-3p
miR-315-5p	miR-457a
miR-10-3p	miR-279a
miR-9c-5p	miR-263b-5p
miR-490-5p	miR-6539
miR-320a-5p	miR-669c-5p
miR-263b-5p	miR-222a-5p
miR-200a-3p	miR-6606-5p
miR-1185	miR-190-5p
miR-455-2-5p	miR-2355-5p
miR-6960-5p	miR-12
miR-6606-5p	miR-6516
miR-285	1M
miR-199b	miR-6522
miR-2285bb	miR-541-5p
miR-1185-5p	miR-3959-5p
miR-2285af	miR-12293-5p
miR-194b-5p	miR-5701
miR-3065-5p	miR-301a
miR-1911-3p	miR-346
miR-3036	miR-2435
miR-3477	miR-377
miR-3955-5p	miR-212-5p
miR-3969	miR-208b
miR-508-5p	miR-666-5p
miR-276-5p	miR-2284h-5p
miR-584	miR-509
miR-10399-3p	miR-3133
miR-6240	miR-350
miR-153-3p	miR-1338-3p
miR-2435	miR-8159-5p
miR-377	miR-1185-1-3p
miR-221-3p	miR-7a-5p
miR-551b	miR-927a-5p
miR-1287	miR-252
miR-135-3-3p	miR-460a-5p
miR-190-5p	miR-1271a
miR-511-5p	miR-298-5p
miR-891a	miR-374b-3p
miR-122b-5p	miR-377-5p
miR-543-5p	miR-932
miR-4657	miR-932-5p
miR-548c	miR-13a-5p
miR-548a	miR-2285df
miR-196d	miR-1981-5p
miR-501	miR-3786-5p
miR-8159-5p	miR-252a
miR-669	miR-34b
miR-510-5p	miR-2796
miR-8973
miR-57
miR-7a-5p
miR-760-5p
miR-202-5p
miR-654-3p
miR-1248
miR-4679
miR-539-3p
miR-186-3p
miR-5091
miR-10400-5p
miR-993a-5p
miR-496
miR-412-3p
miR-2682-5p
miR-199-3-3p
miR-12136
miR-556
miR-6715
miR-337-5p
miR-9c
miR-889
miR-659-5p
miR-191b
miR-2001
miR-1468-5p
miR-199b-3-5p
miR-2411-5p
miR-3959-3p
miR-6516
miR-1304
miR-376c
miR-664b
miR-19a-5p
miR-629
miR-3962
miR-125b-3p
miR-589
miR-1269b
miR-379-3p
miR-223-5p
miR-135a-3p
miR-144-5p
miR-214-3p
miR-434-5p
miR-543-3p
miR-222-5p
miR-154a-3p
miR-92b-3p
miR-769-5p
miR-2284c
miR-16c-5p
miR-30g
miR-79-5p
miR-9e-5p
miR-15a-3p
miR-590-5p
miR-6712-5p
miR-492
miR-1271a
miR-4429
miR-2285cr
miR-2285de
miR-100-3p
miR-9
miR-134
miR-615-5p
miR-381-3p
miR-122-3p
miR-485-3p
miR-1277-5p
miR-3064-5p
miR-298-5p
miR-2765
miR-144
miR-12010
miR-4-5p
miR-135a-2-3p
miR-2284r
miR-8
miR-1246
miR-467c-5p
miR-350
miR-144-3p
miR-153-2-5p
miR-507b
miR-672-5p
miR-279d
miR-467a-5p
miR-135b-2-3p
miR-1338-3p
miR-329a
miR-1197
miR-2370-5p
miR-2404
miR-342-5p
