# Supplementary material for: Identification of Potential miRNA–mRNA Regulatory Network Associated with Growth and Development of Hair Follicles in Forest Musk Deer
Source: Animals (Basel). 2023 Dec 15;13(24):3869. doi: 10.3390/ani13243869 (PMC10740511; doi:10.3390/ani13243869)
Supplement: Supplementary file 1 [file animals-13-03869-s001.zip › Supplementary Table S12.xlsx]

## Sheet: Supplementary File S12
Supplementary Table S12 The hairpin structures, precursor free energy, genome positions, and etc of the novel miRNAs
miRNA ID	genomic_id	precursor free energy	hairpin_start	hairpin_end	hairpin_strand	hairpin_length(nt)	hairpin_seq GC_content (%)	mature_seq	mature_length(nt)	mature_seq GC_content (%)	hairpin_seq	hairpin_struct
novel_1	scaffold235	-25.2	399444	399503	-	59	47.4576	uaauacugccugguaaugaugac	23	39.1304	CAUCUUACUGGGCAGCAUUGGAUGGUGUCUGGUCUCUAAUACUGCCUGGUAAUGAUGAC	((((((((..(((((.((((((.((.......)))))))).)))))..)))).))))..(-25.20)
novel_103	scaffold6	-25.7	9400510	9400572	+	62	59.6774	uuggcucugcgaggucggcuca	22	63.6364	UUGGCUCUGCGAGGUCGGCUCAAGGUGGGUCUGGAUAUUGAGCAGGCCUGUCAGGGCGUUGU	...((((((..(((((.((((((.((........)).)))))).)))))..)))))).....(-25.70)
novel_104	scaffold330	-28.9	1855631	1855693	+	62	43.5484	caggcgggugcugaugagauca	22	59.0909	AUCACAUCAACACUCGUCCGUUCUUAAAUAACAUUGAGAACAGGCGGGUGCUGAUGAGAUCA	(((.(((((.((((((((.((((((((......)))))))).)))))))).))))).)))..(-28.90)
novel_110	scaffold572	-20.9	1155759	1155814	+	55	61.8182	aaccugaggcuccgucagcugcc	23	65.2174	AACCUGAGGCUCCGUCAGCUGCCAUUCACAGUUGUCAGUGCCGGGCCCUCAGCCU	...((((((..(((...((((.((........)).))))..)))..))))))...(-20.90)
novel_120	scaffold88	-31.8	5032439	5032500	+	61	54.0984	cuuccucuucuggucggcaga	21	57.1429	UCCGCUGACUUUGAAGGUGGAAGCACGGUGCUAACAUCUGCUUCCUCUUCUGGUCGGCAGA	...(((((((..(((((.(((((((.((((....)))))))))))))))).)))))))...(-31.80)
novel_129	scaffold7	-31	6290302	6290372	-	70	74.2857	cuggaccggucugccucggc	20	75	CUGGACCGGUCUGCCUCGGCCGGUCGUCGGUGGUCCGCUGUUCUUGACCUGCCGCGCGGUCGCCAGGCGC	...((((((((......))))))))(((((((..((((.((.........)).))).)..)))).)))..(-31.00)
novel_130	scaffold42	-17.8	5513023	5513082	+	59	49.1525	aacuguccugcacacacuggac	22	54.5455	UGGUGUGUGAUGUGUGCAGUCUGAACCGAAUGAAAUCAACUGUCCUGCACACACUGGAC	.((((((((....(..((((.(((...........)))))))..)..))))))))....(-17.80)
novel_132	scaffold730	-20.6	675120	675175	-	55	41.8182	uacugaaauugugcucguagugugc	25	44	UACUGAAAUUGUGCUCGUAGUGUGCUUUGUAUGGCAUGUGAGCUAGUUUCAGACA	..(((((((((.((((...(..((((......))))..))))))))))))))...(-20.60)
novel_135	scaffold430	-35.8	1858097	1858157	-	60	43.3333	ugagagacgugaucuuguuuug	22	40.9091	UGAGAGACGUGAUCUUGUUUUGUUCAACCCAGACUCCAAAACAAGAUCACGUCUCUCAGA	((((((((((((((((((((((.((......))...))))))))))))))))))))))..(-35.80)
novel_138	scaffold1016	-24.7	195022	195083	-	61	49.1803	aaaccaccugggcaaggauucug	23	52.1739	UAAUUCUUGCUCCCCAGGUGAGAGUGCUUUGUGAAUGCAAACCACCUGGGCAAGGAUUCUG	.(((((((((...(((((((.(..(((.........)))..)))))))))))))))))...(-24.70)
novel_143	scaffold12	-27.9	1762822	1762882	-	60	33.3333	aaaguguucauucgggauuuuc	22	36.3636	AAAGUGUUCAUUCGGGAUUUUCGUAAAGAUCUUAGGAAAAUCCCAAAUGAACAUUUUAGC	((((((((((((.(((((((((.(((.....))).))))))))).))))))))))))...(-27.90)
novel_163	scaffold128	-25.4	212978	213038	+	60	61.6667	caaggagggggaugucucugucc	23	60.8696	CAAGGAGGGGGAUGUCUCUGUCCGGUGUCACUGUGUGGACUUUGGCUGCCCCUCCUCCAG	..((((((((.(.(((...(((((...........)))))...)))).))))))))....(-25.40)
novel_171	scaffold953	-22.8	69499	69560	+	61	37.7049	uugugaaugaguuuuggcugacu	23	39.1304	UUGUGAAUGAGUUUUGGCUGACUGUGUUGAUAAGAUAGCAGUCAUAAGCUCAUUCUGUAGU	....((((((((((((((((.((((.(.....).)))))))))).))))))))))......(-22.80)
novel_181	scaffold50	-22.4	720980	721041	-	61	60.6557	uuguggguggacagcuccaac	21	57.1429	AGGAUGCUGCCCAGCGAACCAGGCCCAUGACCACAAAGCCUUGUGGGUGGACAGCUCCAAC	.(((.((((.(((.(..((.((((...((....))..)))).)).).))).)))))))...(-22.40)
novel_183	scaffold69	-30.4	2642972	2643032	+	60	63.3333	cgccccaggucagaaagagcugg	23	65.2174	AGCUCUUUCCUCCUGUGGGGCAGGACUUCCCUGGCUCCGCCCCAGGUCAGAAAGAGCUGG	(((((((((..(((((((((((((.....))).)))))))...)))...)))))))))..(-30.40)
novel_188	scaffold27	-24.3	7371028	7371086	+	58	55.1724	uccagcgguucagaauccaccug	23	56.5217	UCCAGCGGUUCAGAAUCCACCUGCCAAUACAGGGGACGUGGAUUCAAACCCUGGUCCA	.((((.((((..((((((((.(.((.......)).).)))))))).))))))))....(-24.30)
novel_190	scaffold124	-33.7	3767194	3767258	+	64	53.125	cuggacagcuauguggcuuaac	22	50	AAGUCACAUGGCUGAGCCCAGGCCCAGGAAAACUCACUUUGCCUGGACAGCUAUGUGGCUUAAC	((((((((((((((...((((((..((((....)).))..)))))).))))))))))))))...(-33.70)
novel_192	scaffold88	-26.7	8389359	8389438	+	79	46.8354	ugucucuucuucucucaucuaga	23	39.1304	CAGAUGAGCUGAAAGGAGCACUGGAGGGGUCUGCUGUUCAUUUAAUGGCAUGUUCCUGUCUCUUCUUCUCUCAUCUAGA	.(((((((..((((((((.((...(((..(.(((((((.....))))))).)..)))))))))).))).)))))))...(-26.70)
novel_200	scaffold8	-30	2963693	2963748	-	55	72.7273	cgaggcucggcgguccgggaac	22	77.2727	UCCGGUCGCUGUGCUCCCGCCUGAGCAGUAGGGCGAGGCUCGGCGGUCCGGGAAC	(((((((((((.(((..(((((........))))).))).)))))).)))))...(-30.00)
novel_209	scaffold95	-37.5	256266	256336	-	70	61.4286	ugacugccugucucuguccagc	22	59.0909	GUGAUAGGGGCUGGCACUUCAGAGUGAGUGGGCGGGAGCCUUGCUCUCUGACUGCCUGUCUCUGUCCAGC	(.(((((((((.((((..((((((.(...((((....))))..).)))))).)))).))))))))))...(-37.50)
novel_211	scaffold79	-29.04	5093176	5093247	+	71	56.338	ugcucugcucucuguucccagu	22	54.5455	UGCUCUGCUCUCUGUUCCCAGUGUGCUACCUGCCAUAAAUGCCUGAAGCUGGGAGCAAAGUGCAGCGCUGG	.((.((((.((.((((((((((..((..............)).....)))))))))).)).)))).))...(-29.04)
novel_214	scaffold24	-34.9	1312449	1312515	-	66	57.5758	ucuggguugggcacugggccaagc	24	66.6667	GUGGCUCAGUCCUCACCUGGACCUUUAAUGAACCUUUCCAGGUCUGGGUUGGGCACUGGGCCAAGC	.((((((((((((.(((..(((((..((.......))..)))))..))).))).)))))))))...(-34.90)
novel_218	scaffold147	-40.7	1510688	1510750	-	62	75.8065	cuccugggccgcgcaccccgca	22	81.8182	CGGGGUGGCGGUGCCGGGAGGAGCUUCUGCCCUCUCCUUCCUCCUGGGCCGCGCACCCCGCA	((((((((((((.(((((((((((....))........)))))))))))))).)))))))..(-40.70)
novel_221	scaffold101	-33.1	4341794	4341852	+	58	36.2069	ucugaacaacggacuauucucc	22	45.4545	UCUGAACAACGGACUAUUCUCCACAUUUUAAUGUUUGUAGAAUAGUCCGUUGUUCAGA	((((((((((((((((((((.((.((......)).)).))))))))))))))))))))(-33.10)
novel_222	scaffold30	-36.5	1328912	1328970	+	58	70.6897	uccacugaccgcccugugcccaca	24	66.6667	CCGGGCCAGGAGGUAGGGGACCCAGGCACUUGGGUCCACUGACCGCCCUGUGCCCACA	..((((((((.(((.((((((((((....)))))))).)).)))..)))).))))...(-36.50)
novel_228	scaffold30	-26	2390350	2390403	+	53	67.9245	gggucucuggaaaggucuggc	21	61.9048	CAGGCCCUCCCUGGUGACCCCAGUCGCUGGUGGGGUCUCUGGAAAGGUCUGGC	((((((....(..(.(((((((.(....).))))))).)..)...))))))..(-26.00)
novel_229	scaffold191	-21.7	2350081	2350143	-	62	56.4516	ucuggcugcuauggcccccucc	22	68.1818	AGGUGCCAUUCUGAGGGCCAGGAGUUUGAUUAUGUGUCACUCUGGCUGCUAUGGCCCCCUCC	.((.(((((...(..((((((.(((..(((.....)))))))))))).).))))))).....(-21.70)
novel_23	scaffold209	-22.7	2172365	2172425	+	60	48.3333	caaagugcuuacagugcagguagu	24	45.8333	CAAAGUGCUUACAGUGCAGGUAGUGAUUUGCGCAUCUACUGCAGUGAAGGCACUUGUAGC	..((((((((.((.(((((.(((((.......)).)))))))).)).)))))))).....(-22.70)
novel_230	scaffold88	-39.22	5204967	5205034	-	67	64.1791	ugcuuccuggguuccccucccaga	24	62.5	ACAGGAGGGGGGCCCAGGUAGAAUGGCAGCCACCCCUAAAGCCUGCUUCCUGGGUUCCCCUCCCAGA	...(((((((((((((((.((...(((.............)))..)).)))))))))))))))....(-39.22)
novel_233	scaffold36	-46.8	193342	193406	-	64	45.3125	aggcccuaaucucaccuguaga	22	50	AGGCCCUAAUCUCACCUGUAGAUGACAAAACUAUUGUCAUCUACAGGUGAGAUUGGGGUUCGGA	.(((((((((((((((((((((((((((.....)))))))))))))))))))))))))))....(-46.80)
novel_247	scaffold102	-24.67	4044924	4044989	-	65	56.9231	ccuccgccuuccacccuggucu	22	68.1818	GAGAGGGAAGAGGGAAGGAGGGAUAACGUAGGAAAGAGAUCUCCCUCCGCCUUCCACCCUGGUCU	...((((..(((((..(((((((..................))))))).)))))..)))).....(-24.67)
novel_250	scaffold79	-29.21	4782799	4782867	-	68	60.2941	acugcucucucuccuucccagu	22	54.5455	CGGGAGGAAGGGAUGAGUAGCUGGACUGUGUCGUGUCCUGCCCCUGACUGCUCUCUCUCCUUCCCAGU	.((((((.(((((.(((((((.((((........)))).)).......)))))))))).))))))...(-29.21)
novel_254	scaffold587	-29.86	181551	181611	-	60	30	auucacacuggauuaucaagu	21	33.3333	AUUCACACUGGAUUAUCAAGUGGUAAUAAUAAUAAUGCAGUUGAUAAUCCAGUGUGAAUA	(((((((((((((((((((.((...............)).))))))))))))))))))).(-29.86)
novel_256	scaffold917	-30.6	445003	445063	+	60	73.3333	ugucuggccggcggaggcugagcg	24	75	UGUCUGGCCGGCGGAGGCUGAGCGCGAAUUUAGCGAGCCGCGGCGCCCGCCGACCAGGGA	..(((((.((((((..((((..(((.......))).....))))..)))))).)))))..(-30.60)
novel_259	scaffold989	-25.5	440228	440286	-	58	32.7586	ucuuugauuccacagacugga	21	42.8571	UCUUUGAUUCCACAGACUGGAUUUAUUGAAAUAAAUCUGAUCUGUGUAAUCAGGGAUU	(((((((((.((((((..((((((((....))))))))..)))))).)))))))))..(-25.50)
novel_272	scaffold41	-22.8	6068997	6069051	+	54	55.5556	ucaugcuucucuugcuuccacagc	24	50	CUGGAGGCUGGAGAGCUCAGAGCUGUUCUCUCAUGCUUCUCUUGCUUCCACAGC	.(((((((.(((((((..((((.....))))...)).))))).)))))))....(-22.80)
novel_275	scaffold350	-34.6	1651927	1651989	-	62	54.8387	guagcagcacccgucuugugac	22	59.0909	GUAGCAGCACCCGUCUUGUGACCUUCUUGUCAUUGCUAGUCACAAGACGGCUGCUGCUAGGC	.((((((((.((((((((((((...(........)...)))))))))))).))))))))...(-34.60)
novel_276	scaffold196	-21.8	721865	721924	-	59	64.4068	agggacgcagagcagacgucugu	23	60.8696	AGGGACGCAGAGCAGACGUCUGUCCUCACCUCAGCAGGCUGCCUGUCCUCUGCCCCACU	.(((..(((((((((.(((((((..........)))))).).)))..)))))))))...(-21.80)
novel_277	scaffold349	-37.3	1972198	1972274	+	76	64.4737	uugcugccagggacuccugc	20	65	UUGCUGCCAGGGACUCCUGCCGAAAGCAAUGGAGCCCAGUGUGGGCAGUGCCAGGCAGGAGCUGCUGACAGCCAGG	..((((.(((.(.((((((((....(((.....((((.....))))..)))..)))))))).).))).))))....(-37.30)
novel_279	scaffold328	-26.54	214627	214689	+	62	58.0645	cacugcacaacucaaagggc	20	55	CACUGCACAACUCAAAGGGCCUGUGUGGUGGAAGUGGGGCCCUUGGAAUUGGGCAGUGUGGU	((((((.(((.((.((((((((..............)))))))).)).))).))))))....(-26.54)
novel_280	scaffold71	-27.2	1485834	1485895	-	61	50.8197	cugucuaugcgaggagagguga	22	54.5455	CACCUCUCCUGUGCAAAGACCAAGUUCAAGAAAGACCACCUGUCUAUGCGAGGAGAGGUGA	((((((((((.((((.((((...(.((......)).)....)))).)))))))))))))).(-27.20)
novel_281	scaffold12	-24.1	7190208	7190272	+	64	57.8125	ccgcuucccuccccugcccaga	22	72.7273	AGGGCACUGGAGGUCAAAGCUCACAGGGAUACUAACACUGAUCCGCUUCCCUCCCCUGCCCAGA	.(((((..(((((...((((...((((........).)))....)))).)))))..)))))...(-24.10)
novel_284	scaffold364	-34.1	1850733	1850800	-	67	64.1791	ucgagccccagcccuuacuugu	22	59.0909	AAGGGAAGGGCCUGGGCUCAGGCAUCAGGGUGCUCGACUCCGAGCUCGAGCCCCAGCCCUUACUUGU	.(((.((((((..((((((..((.((.((((.....)))).))))..))))))..)))))).)))..(-34.10)
novel_285	scaffold86	-28.9	3329404	3329465	-	61	59.0164	uacgugucccggcauucauugc	22	54.5455	UACGUGUCCCGGCAUUCAUUGCGUGCUGCCCUUGGGUGCGAGGCAUGCUGGGAUUCGUAGU	((((.(((((((((.....(((.(((.(((....))))))..)))))))))))).))))..(-28.90)
novel_286	scaffold55	-29.4	708305	708362	-	57	61.4035	ucuggugggaaggaagggaca	21	57.1429	AGCCCUUCCCUUUCACUGGCCUGUAGCCAGCCCAGGUCUGGUGGGAAGGAAGGGACA	.((((((((.(..(((..(((((.........)))).)..)))..).))))))).).(-29.40)
novel_287	scaffold216	-25.2	3788881	3788940	+	59	64.4068	ccugugaccacgugccuucug	21	61.9048	CCUGUGACCACGUGCCUUCUGGUGCUCCCACGAGUCCAGGGGAUGGGCUGUCGCAGACU	.(((((((..(.(..(((((((.((((....)))))))))))..).)..)))))))...(-25.20)
novel_288	scaffold261	-46.7	37023	37093	-	70	38.5714	uuaggcaaguguuggaccauacu	23	43.4783	UAUGGUCCAACACUUGCCUAAAGGAAAUAGUCACAUAGUAAUUUCCUUUAGGCAAGUGUUGGACCAUACU	((((((((((((((((((((((((((((............))))))))))))))))))))))))))))..(-46.70)
novel_290	scaffold290	-23.4	2369305	2369364	-	59	35.5932	aaagccugaacgaauuuguua	21	33.3333	AAAAAGUUCGUUUGGGUUUCUCUGUAAUGUCUUGUGGAAAAGCCUGAACGAAUUUGUUA	...(((((((((..(((((.((..(((....)))..)).)))))..)))))))))....(-23.40)
novel_291	scaffold12	-51.3	8059672	8059750	+	78	83.3333	ccccucccccgcccgccgca	20	90	CCGGCACGGCGGGGAGGGGCACCUGCCGCCCCUCCCUGGCUCUGGGGUGGGCACCUGCCCCCUCCCCCGCCCGCCGCA	.((((..(((((((.((((((..(((((((((...........))))).))))..))))))...))))))).))))..(-51.30)
novel_292	scaffold361	-44.5	1323976	1324027	+	51	64.7059	cuccucuggcagcagccucuga	22	63.6364	AGGCUGCUGCCAGAGGAGAUGGGGAGCCACUCCUCUGGCAGCAGCCUCUGA	((((((((((((((((((.(((....)))))))))))))))))))))....(-44.50)
novel_293	scaffold6	-54.8	1816214	1816288	+	74	78.3784	cccccucccccgcccgccgca	21	90.4762	GGGUGGAGACGGGGGGGGGGCGUGGGGAAGAGCUGAGGGCAGCUGCUCCCCUUCCCCCUCCCCCGCCCGCCGCA	.(((((.(.(((((((((((...(((((..(((((....)))))..)))))...)))))))))))))))))...(-54.80)
novel_296	scaffold316	-37.1	523346	523407	-	61	42.623	aacagaaagugacugagaugu	21	38.0952	AACAGAAAGUGACUGAGAUGUCAGUUGGAAAGCAGUUGACACCUCAGUCACUUUCUGUUAG	(((((((((((((((((.(((((..((.....))..))))).)))))))))))))))))..(-37.10)
novel_302	scaffold41	-31.1	6143546	6143605	+	59	67.7966	agcugugccucuguuccucagc	22	59.0909	UGGGGGACAGGGUGUGCGGUGGCGGUCCUCCCUGUGCAGCUGUGCCUCUGUUCCUCAGC	((((((((((((.(..((((.((((......))))...))))..)))))))))))))..(-31.10)
novel_304	scaffold16	-45.4	6159901	6159966	-	65	75.3846	uccgggcugcagugcgcc	18	77.7778	UCCGGGCUGCAGUGCGCCUGCGCGGCGGCGCUCUCUGCUGCGCAUGCGCGCUAGCGGCUCUGAGC	((.((((((((((((((.((((((((((......)))))))))).))))))).))))))).))..(-45.40)
novel_311	scaffold351	-40.7	370678	370746	-	68	63.2353	augggccggugugugcugaacg	22	63.6364	CUCGGCACAUGUCUGGUGUGUGCUGAGCCCUCACUGGGUGAGCAGCAUGGGCCGGUGUGUGCUGAACG	.((((((((((.(((((.(((((((.((((.....))))...))))))).)))))))))))))))...(-40.70)
novel_314	scaffold48	-33.5	330500	330557	-	57	71.9298	aaccgcgcucucucccggcagu	22	68.1818	AGUCGGGAGGCCGCGGCGGAAGGAGGAGGAGCUCCAACCGCGCUCUCUCCCGGCAGU	.(((((((((..(((.(((..((((......))))..))))))..)))))))))...(-33.50)
novel_318	scaffold71	-41.1	2193657	2193720	+	63	73.0159	ucccugugcggaggggcucagg	22	72.7273	UGGGCCCCUCCCCGCUGACAGGAGAGGGACGGAGAAGCCCCUCCCUGUGCGGAGGGGCUCAGG	(((((((((((..((..(((((.(((((.(......).)))))))))))))))))))))))..(-41.10)
novel_321	scaffold499	-38.9	1909422	1909485	-	63	33.3333	uauaacuaacuguagccccuuu	22	36.3636	AGGGGCUACAGUUAGUUAUAUGAAAUAUCAGAAAUGAAACAUAUAACUAACUGUAGCCCCUUU	((((((((((((((((((((((.....(((....)))..))))))))))))))))))))))..(-38.90)
novel_322	scaffold234	-31.4	448613	448668	+	55	74.5455	uccccuccgcccugcccugcagu	23	73.913	CGUGGGGCAGACGGAGGGCUGCUGGCUGACCCUCCCCUCCGCCCUGCCCUGCAGU	.(..((((((.(((((((..(..((....)))..)))))))..))))))..)...(-31.40)
novel_33	scaffold72	-20.4	3519028	3519085	-	57	45.614	aacccguagauccgaacuugug	22	50	AACCCGUAGAUCCGAACUUGUGGUGAUAGUCCACACAAGCUUGUGUCUAUAGGUAUG	.(((..((((..(((.((((((.((......)))))))).)))..))))..)))...(-20.40)
novel_332	scaffold219	-29	878153	878214	-	61	49.1803	cguucaguccaacucuuugcgac	23	52.1739	CACAAAGAGUUGGACACAACUGAGUGACUCAGUCAGUCCGUUCAGUCCAACUCUUUGCGAC	(.(((((((((((((..(((.((.((((...)))).)).)))..))))))))))))).)..(-29.00)
novel_342	scaffold2	-27.5	7433776	7433845	+	69	37.6812	uuaaauuuguguggacugaugaga	24	33.3333	UUAAAUUUGUGUGGACUGAUGAGAUCCAAGAAGAAGUGGGUCUUGUCAGUCUGAUCACAUUUAAAGAAG	(((((..((((.(((((((..(((((((........)))))))..)))))))...))))))))).....(-27.50)
novel_343	scaffold30	-30.2	857822	857881	+	59	64.4068	uccgccuugugcuuccugcaga	22	59.0909	UGCGGGGUGGGCAUGGCUAAGGGAUCCCUGGGAACCCUCCGCCUUGUGCUUCCUGCAGA	(((((((.(.(((.(((..((((.(((...))).))))..))).))).).)))))))..(-30.20)
novel_344	scaffold111	-29.3	1789266	1789323	+	57	66.6667	cuuccucuccucagaagcccc	21	61.9048	CGGGCUUCUGUGCUGGGAGGACGGUGCAGGCUGGAGCUUCCUCUCCUCAGAAGCCCC	.(((((((((....(((((((.(.(.(.....).).).)))))))..))))))))).(-29.30)
novel_345	scaffold102	-39.8	2101372	2101437	-	65	70.7692	gcgugcucagaacucccuggc	21	66.6667	GGGGGCGUUACUGAGCACCCUCCCGCCGAGUCCUGGCUGGGGGAGCGUGCUCAGAACUCCCUGGC	.((((.(((.((((((((.(((((.((.(((....)))))))))).))))))))))).))))...(-39.80)
novel_349	scaffold258	-35.1	2078421	2078481	+	60	41.6667	acugguauuuuaggaaacuugg	22	36.3636	ACUGGUAUUUUAGGAAACUUGGGUGCACCCAAUACACCGAAGUUUCCUAAAAUACCAGCU	.(((((((((((((((((((.((((.........)))).)))))))))))))))))))..(-35.10)
novel_356	scaffold55	-33.7	2295961	2296020	+	59	69.4915	agcccgagggucccaagcugagc	23	69.5652	AGCUUGGGCCCCUAGGGAGCUCCCGGAAGCAGCUGGAGCCCGAGGGUCCCAAGCUGAGC	((((((((.((((..((.((((((....).....))))))).)))).))))))))....(-33.70)
novel_359	scaffold234	-40	3301763	3301851	+	88	65.9091	agcagaucagggaggagcuggccug	25	64	GGCCUGGAGCCUCCUGAGGGGCCCAGGACCUCCAGAGCCCUGGCUAGUGGAAGCAGUAACUGGAGCAGAUCAGGGAGGAGCUGGCCUG	((((.((..((((((((...((((((.((.((((.(((....)))..))))....))..)))).))...))).)))))..))))))..(-40.00)
novel_361	scaffold213	-33.3	2597009	2597070	-	61	65.5738	caccuguguccccucccuccagc	23	69.5652	UGGAGGGGGAAGGCUGCAGUGAGAGGUGGCAUGGCUCUCACCUGUGUCCCCUCCCUCCAGC	(((((((((..(((.((((((((((.(.....).)))))).)))))))..)))))))))..(-33.30)
novel_364	scaffold30	-29.3	7323539	7323599	+	60	63.3333	cacugcaggcggcugcucauccca	24	66.6667	CACUGCAGGCGGCUGCUCAUCCCAGAUGUUUUCCUCCUGGGAUGGCAGGCAGGCAGGAGG	..((((..((..((((.((((((((..(.....)..))))))))))))))..))))....(-29.30)
novel_365	scaffold117	-25.9	3120189	3120253	+	64	64.0625	ugugagugugaggcuguggacu	22	54.5455	UGUGAGUGUGAGGCUGUGGACUGCGGGUGCCCUGACUCACUGUCCCCUGCCCUCGUCUCACAGC	((((((((.(.(((.(.((((.(.((((......)))).).)))).).)))).)).))))))..(-25.90)
novel_373	scaffold216	-23.9	4064054	4064113	-	59	57.6271	uacgcuggacaugcuguuggc	21	57.1429	UACGCUGGACAUGCUGUUGGCUGUGAGCGCCUGCUUGCCAUGGGCUUGUUCUGCGAACA	..(((.(((((.(((..((((...((((....))))))))..))).))))).)))....(-23.90)
novel_382	scaffold16	-34.1	1338225	1338288	-	63	61.9048	cccccacucuuggcucugacca	22	63.6364	GUCAGAGUUGAGGGAGGGGACGCAGUCUCUGCUCACGUGCACCCCCACUCUUGGCUCUGACCA	((((((((..((((.((((..(((((........)).)))..)))).))))..))))))))..(-34.10)
novel_384	scaffold118	-33.2	3566210	3566263	-	53	35.8491	agugccugaugaacuuauucuuu	23	34.7826	AAUAAGUUCAUCAGGCACUCUAUCUAUCAGAGUGCCUGAUGAACUUAUUCUUU	(((((((((((((((((((((.......)))))))))))))))))))))....(-33.20)
novel_387	scaffold328	-40.8	632164	632239	+	75	68	auuccuggccucugugggacc	21	61.9048	UCCCAGGGGACCAGGGACCAGUGCCGGGAGCUGGUACAGAGGGCUCCCUCCCUGAUUCCUGGCCUCUGUGGGACC	(((((((((.(((((((.(((.(..(((((((.........)))))))..)))).))))))))))))).)))...(-40.80)
novel_392	scaffold59	-25	5342478	5342542	+	64	59.375	uucucugaccucuuccuccccagu	24	54.1667	UUGGGGAAGGUGAGGGUGAUGGCCAGCAUCCCUGAAGCCCUUCUCUGACCUCUUCCUCCCCAGU	(((((((((((.((((....((((((.....)))..)))...)))).)))).....))))))).(-25.00)
novel_394	scaffold274	-45	574984	575067	-	83	57.8313	cgacauucugaacccccaggcu	22	59.0909	ACUGGGGGUUGAGAAUGUAGCUGUCUCAAACGCUGCCCUCCUGACGUGAGAGCAGCAGGAGCGACAUUCUGAACCCCCAGGCU	.(((((((((.(((((((.(((.(((.....(((((.((((....).))).))))))))))).))))))).)))))))))...(-45.00)
novel_395	scaffold30	-31.5	6400612	6400677	-	65	67.6923	cugcggcuggacugucaggugu	22	63.6364	ACCUUGACCGCCAGCCCUGGGGAUCAUGGCUCUGGGCUCGCCCCUGCGGCUGGACUGUCAGGUGU	((((.(((.((((((((.((((.....(((.....)))..)))).).)))))).).)))))))..(-31.50)
novel_398	scaffold914	-27	322492	322552	-	60	61.6667	uucugagcuggccugcuacc	20	60	AAGCAGGGAUGAGCCCAGAAAGAAUCGGCUCCCGGGGGCUUUCUGAGCUGGCCUGCUACC	.((((((..(.(((.(((((((..((((...))))...))))))).))).)))))))...(-27.00)
novel_399	scaffold90	-24.2	4592868	4592922	+	54	51.8519	ucugacugaaagaaaccuccga	22	45.4545	AGAGGUUCUGGAGGUCAGUCCUCCUAAGGAGCUCUGACUGAAAGAAACCUCCGA	.((((((((...((((((..((((...))))..))))))...)).))))))...(-24.20)
novel_40	scaffold1016	-18.32	204985	205044	-	59	50.8475	caugccuugaguguaggaccgu	22	54.5455	CAUGCCUUGAGUGUAGGACCGUUGGAAUCUUAAUUACCCUCCCACACCCAAGGCUUGCA	((.((((((.((((.(((..((.............))..))).)))).)))))).))..(-18.32)
novel_407	scaffold15	-31.1	339232	339287	-	55	61.8182	ccggacgugggcaacucgcgu	21	71.4286	AGGAGUUGCCCGGAGUCCAGUGGGUUACAGUUCACCGGACGUGGGCAACUCGCGU	..((((((((((..((((.(((..(....)..))).)))).))))))))))....(-31.10)
novel_410	scaffold103	-25.9	3266243	3266303	+	60	60	ugacaucgcugaggagcggcga	22	63.6364	GCCGGCCCUGGUGGUUUGUCACUGUACUGGUUAUGUGGUGACAUCGCUGAGGAGCGGCGA	((((.((..(((((..((((((..((.......))..)))))))))))..))..))))..(-25.90)
novel_412	scaffold2	-26.3	7657255	7657310	+	55	47.2727	uucuuggugaccuggacucauu	22	45.4545	GGAGCCAGGGGACUGAAGAACAUUUCAUGAAUGUUCUUGGUGACCUGGACUCAUU	.((((((((..(((.((((((((((...)))))))))))))..))))).)))...(-26.30)
novel_413	scaffold265	-24.6	933212	933271	-	59	57.6271	acuguuguuuggggcuccagc	21	57.1429	ACUGUUGUUUGGGGCUCCAGCCAUUCAGUAUGCACUUGGGGGGCCCUCGGCAACUAAGC	...(((((..((((((((..(((...(((....))))))))))))))..))))).....(-24.60)
novel_415	scaffold148	-41.9	955716	955801	+	85	65.8824	ugcugaccguccucuccacaga	22	59.0909	UGGGAGGGGAACAUUGGCGGGGGCGGGGGUGGGGCUGUCAAAGAGCACUUGCCAGUGGCCCAGUGCUGACCGUCCUCUCCACAGA	((((((((((...(..(((.((((.(.((..(((((.......))).))..))..).))))..)))..)...)))))))).))..(-41.90)
novel_416	scaffold692	-25.04	113155	113218	+	63	41.2698	aaugaucuuuuggggccaacucc	23	47.8261	UGGCCCAAAAUGUUCGUUCAGGUUUUUCUAUAAUAUCCUGAAUGAUCUUUUGGGGCCAACUCC	((((((.(((...(((((((((..............)))))))))...))).)))))).....(-25.04)
novel_417	scaffold12	-16.9	8810553	8810612	-	59	32.2034	aacacccggaagaacuuuuugg	22	45.4545	AAAAAGUUCACUUGGGUUUUUUGUAAUAUGUUUGAAAAACACCCGGAAGAACUUUUUGG	(((((((((..((((((.((((.(((.....))).)))).))))))..)))))))))..(-16.90)
novel_419	scaffold4913	-25.7	6916	6998	+	82	56.0976	ugcucacgguugucuuccugcaga	24	54.1667	UGUGAGAGUCGAGAGGAGCAGGAGACGUGGGGGGCAGAUUGUGUGAUGACUGUGUCACUGCUCACGGUUGUCUUCCUGCAGA	........((....)).((((((((((....(((((......(((((......)))))))))).....)))).))))))...(-25.70)
novel_420	scaffold1671	-22.6	11137	11202	+	65	58.4615	aaugguucucaggccccagccaa	23	56.5217	GUGGACCGGGGCACCACUUCUGGUCAAAAGGCUGAACAGCAGAAUGGUUCUCAGGCCCCAGCCAA	.(((.(.(((((((((.(((((.(((......)))....)))))))))......))))).)))).(-22.60)
novel_422	scaffold24	-28.5	4011445	4011500	+	55	52.7273	cugagagcuguagccaagacuc	22	54.5455	CUGAGAGCUGUAGCCAAGACUCCAGGUGAAAGGAGUGAAGGCUACUCUCUCAGGA	(((((((..((((((...(((((........)))))...)))))).)))))))..(-28.50)
novel_427	scaffold38	-25.7	3310701	3310766	-	65	55.3846	gcucugcucuuggcugaccucu	22	59.0909	AAGUCGGCCACGAGGGGAUCUGGGAGAAAUGCCAAGAAACACAGCUCUGCUCUUGGCUGACCUCU	..((((((((.(((.((((((((.(....).)).)))........))).))).))))))))....(-25.70)
novel_429	scaffold381	-34.2	568812	568869	-	57	59.6491	gaagaaccguugugggagcucu	22	54.5455	AGCUCCCUUAGCGGUUACGCCGCUGGAGACGGUUGGAAGAACCGUUGUGGGAGCUCU	(((((((.((((((((...((((((....))).)))...)))))))).)))))))..(-34.20)
novel_434	scaffold13	-31.3	3920778	3920839	-	61	55.7377	ugugacugguugaccagagggg	22	59.0909	UGUGACUGGUUGACCAGAGGGGCAAACACUCUGUUCACCCUCUGGGCCACCUAGUCACCAA	.((((((((.((.((((((((...(((.....)))..))))))))..)).))))))))...(-31.30)
novel_436	scaffold24	-33.6	4378630	4378688	+	58	60.3448	ugcugcucucugguuucucugagu	24	50	CCUCGGGGUCCAGAGAGUAGAACCACCCUCCCGGUGCUGCUCUCUGGUUUCUCUGAGU	.(((((((.(((((((((((.(((........))).)))))))))))...))))))).(-33.60)
novel_439	scaffold28	-20.6	6033945	6034000	-	55	40	uaaggagugugaaacuuagguu	22	36.3636	UAAGGAGUGUGAAACUUAGGUUUGUUCUGUGAAACUUAGGGUUCGCAAUCCUAUG	..((((.((((((.(((((((((........))))))))).)))))).))))...(-20.60)
novel_440	scaffold3707	-27.6	2572	2628	+	56	60.7143	cagcucuccucuccucuucag	21	57.1429	GUGGAGGAAGGAGGGCUUCGGGGCAACAGAGAAGCCAGCUCUCCUCUCCUCUUCAG	(.(((((((((((((((((..(....)...))))))....))))).)))))).)..(-27.60)
novel_443	scaffold227	-21.24	2301396	2301456	-	60	33.3333	aguaaguuuguuuggguuuuuc	22	31.8182	AGUAAGUUUGUUUGGGUUUUUCCAUAAGAAGUAACAGAAAAACCUGAACAGACUUUUUGG	...(((((((((..((((((((..............))))))))..))))))))).....(-21.24)
novel_445	scaffold172	-34.3	10448	10530	-	82	59.7561	ucgauccccggcaucuccacua	22	59.0909	GAGGGUGGGGGAUGUAGCUCAGUGGUAGAGCGCAUGCUUUGCAUGUAUGAGGCCCCGGGUUCGAUCCCCGGCAUCUCCACUA	((((((.((((((..(((((.(.(((...(..(((((...)))))..)...)))).)))))..)))))).)).)))).....(-34.30)
novel_448	scaffold1101	-25.5	460944	461008	-	64	48.4375	aauuaccauccucgucuacccuug	24	45.8333	AAUUACCAUCCUCGUCUACCCUUGUAUUCACUAGGUAUCAAGGGGCGGGGCGUGGUAAGAUUUG	..(((((((((((((...((((((((((.....)))).)))))))))))).)))))))......(-25.50)
novel_449	scaffold81	-42.5	3097991	3098050	-	59	50.8475	auggcuuuguuggcucugccucc	23	56.5217	UGGCAGAACCAACAAAGUCAUCUCUCGUUUGGAGAGAUGGCUUUGUUGGCUCUGCCUCC	.((((((.((((((((((((((((((.....)))))))))))))))))).))))))...(-42.50)
novel_45	scaffold1016	-21.8	191160	191218	-	58	50	cacccauugcacaucggagcugu	23	56.5217	CACCCAUUGCACAUCGGAGCUGUGAAUUCUCAAAGCACCUCCUGUGUGCAUGGAUUAC	...((((.((((((.((((.(((...........))).)))).)))))))))).....(-21.80)
novel_451	scaffold324	-21.4	1814063	1814123	-	60	33.3333	agaaaccuagaugaacuuuuugg	23	34.7826	AAAAAGCUCAUUUGGGUUUUUCCAUAAGAUGUCAUGAAGAAACCUAGAUGAACUUUUUGG	((((((.((((((((((((((.(((........))).)))))))))))))).))))))..(-21.40)
novel_455	scaffold42	-21.05	2885611	2885677	-	66	43.9394	uggaccaccagggacguuucuc	22	59.0909	UGGACCACCAGGGACGUUUCUCUUUUCUCUUUUAAAAUCAUUUAGGAGCUUCCCUAGUGGCUCAGU	((..((((.(((((.((((((......................)))))).))))).))))..))..(-21.05)
novel_456	scaffold1126	-20.2	197718	197777	-	59	45.7627	acagcugagaaguaggacaaug	22	45.4545	UCCUCUUACUCCUCUGCUAUCUUGUUAGGGAGUCAAGACAGCUGAGAAGUAGGACAAUG	...(((((((.(((.(((.(((((.........))))).))).))).))))))).....(-20.20)
novel_466	scaffold78	-28	664919	664980	-	61	55.7377	ucagggcaaacuucauagaga	21	42.8571	CCUCUGUGAAGCCUGCCCUAACUUCCCCCCUCCAGCAGAGUCAGGGCAAACUUCAUAGAGA	.((((((((((..((((((.((((..(.......)..)))).))))))..)))))))))).(-28.00)
novel_467	scaffold48	-33.9	2326227	2326286	-	59	71.1864	agcggccuugucuccccugcagc	23	69.5652	GGGAGGGGUGAAGGGGCGUCCAGCCAGGAAGGGCUGAGCGGCCUUGUCUCCCCUGCAGC	.(.(((((.((((((.((..(((((......)))))..)).)))).)).))))).)...(-33.90)
novel_468	scaffold61	-33.1	4853439	4853493	-	54	37.037	uuugcugugugugaucccuuua	22	40.9091	AAGAGGAUCACACACAGCAAAAUUUUCACAAUUUUGCUGUGUGUGAUCCCUUUA	(((.((((((((((((((((((((.....)))))))))))))))))))))))..(-33.10)
novel_47	scaffold209	-26.6	2173085	2173143	+	58	37.931	uaaagugcuuauagugcagguagu	24	37.5	UAAAGUGCUUAUAGUGCAGGUAGUGUCUGGUUAUCUACUGCAUUAUGAGCACUUAAAG	..(((((((((((((((((.(((((......)).))))))))))))))))))))....(-26.60)
novel_471	scaffold313	-22	945384	945442	+	58	43.1034	ugagaacugaauuccauggguu	22	40.9091	UGAGAACUGAAUUCCAUGGGUUGUGUCAGCGUCAGACCUGUGAAGUUUAGUUCUUUAG	.((((((((((((.((((((((.((....))...)))))))).))))))))))))...(-22.00)
novel_473	scaffold22	-22.7	8185105	8185168	-	63	46.0317	cuugugcacagagcuugcuugu	22	50	CUUGUGCACAGAGCUUGCUUGUUGAGUUAAUGUGUAAGCAGGAAGCAGCUAAUGUGCCAAGCU	((((.(((((.((((.((((.(((..(........)..))).))))))))..)))))))))..(-22.70)
novel_474	scaffold16	-27	8135239	8135298	-	59	54.2373	uagacguaggcucugcccuccac	23	60.8696	AGAGGGCAGUUCCUACAGCCUCAGAAGUCUUUGAUGUAGACGUAGGCUCUGCCCUCCAC	.((((((((..(((((.((.(((((....))))).))....)))))..))))))))...(-27.00)
novel_475	scaffold1108	-40.6	123419	123501	+	82	53.6585	aguggauggagccagacucauuu	23	47.8261	UGGGGUUUGGGUUCCUCCUGGGUUUGGGGAGGCCAGAAGUUAGACUUCUGGUCAGAACCAGUGGAUGGAGCCAGACUCAUUU	..((((((((.(((((((..(((((.....(((((((((.....))))))))).)))))...))).))))))))))))....(-40.60)
novel_481	scaffold192	-23.6	941909	941967	-	58	43.1034	aauaggaucagaacuucuugga	22	36.3636	AAUAGGAUCAGAACUUCUUGGACUUUGGCUGUUGCCCAAGAAGUUUGGAUCCUUUCAG	...((((((.(((((((((((......((....))))))))))))).)))))).....(-23.60)
novel_493	scaffold88	-28	5645893	5645946	+	53	49.0566	uacuucgcaggaagccggacug	22	59.0909	UACUUCGCAGGAAGCCGGACUGCCUUUUGUAGUCUUGCUUCUUGGGAAGCAUU	..((((.((((((((.(((((((.....))))))).)))))))).))))....(-28.00)
novel_494	scaffold274	-17.3	2536654	2536716	+	62	48.3871	uuauggucuuguuuguuu	18	27.7778	UUAUGGUCUUGUUUGUUUUGGGCUUCUCUGGCGGCUCAGACGGUAAACAAUCGGCCUGCAAU	....(((((((((((.((((((((.(....).))))))))...)))))))..))))......(-17.30)
novel_496	scaffold795	-26.2	810234	810306	+	72	52.7778	ucccuguucgggcgccagu	19	68.4211	UCCCUGUUCGGGCGCCAGUUGCCACAGUCUUUGUAGAUUGGGAUCUGUGGACUGGAGUUGAAGAGAAGGACA	(((((.(((((.(.(((((..((((((((((........)))).))))))))))).)))))).))..)))..(-26.20)
novel_498	scaffold230	-41.1	1303874	1303952	+	78	71.7949	cggacgcuaccuaggggccggc	22	77.2727	UGGCCCCUUUCUGGCGCCCGGAGUUUCCGCAGCUGGGAGUGCCGCGAGGGAUAGCCCGGACGCUACCUAGGGGCCGGC	.(((((((...(((((.((((.((..((((.((.......)).))).)..))...)))).)))))...)))))))...(-41.10)
novel_499	scaffold50	-24.5	3067089	3067155	-	66	46.9697	ugauuggaagauucucugcaaca	23	39.1304	UGGCAGAGGUACCCAUUCCAUUCCCAGUUUGCUCAGUAUCUGGUGAUUGGAAGAUUCUCUGCAACA	..(((((((......(((((.((((((..(((...))).)))).)).)))))...)))))))....(-24.50)
novel_504	scaffold220	-14.5	163635	163689	+	54	33.3333	agaaaaaccggagugaacuuuu	22	36.3636	AAGUUCAUUCGAGCUUUUCCAUAACAUCUUAUAGAAAAACCGGAGUGAACUUUU	((((((((((..(.(((((.((((....)))).))))).)..))))))))))..(-14.50)
novel_505	scaffold219	-17.2	2485593	2485647	-	54	64.8148	ugccucuucucacucccccagc	22	63.6364	UGCCUCUUCUCACUCCCCCAGCACCCUCUGCUGGCUUCGGAGGGAACCUGCACC	(((...(((.(.((((.((((((.....))))))....))))))))...)))..(-17.20)
novel_511	scaffold12	-26.44	8172406	8172463	+	57	49.1228	auggagaaagauguggccuc	20	50	AUGGAGAAAGAUGUGGCCUCCUGCUGUGUUUCUCUGGAGGCCUCACUUUCUCUUUUC	..((((((((.((.(((((((..............))))))).))))))))))....(-26.44)
novel_512	scaffold44	-22.7	5573504	5573578	-	74	50	uggaaugaugguaagucugacg	22	45.4545	UCAGAUUGAGCAGCGUGGUGCUGAUUGCUGCCCUUGGUAAGAGCAGUUUUGGUGGAAUGAUGGUAAGUCUGACG	(((((((.(.((.(((..(((..(..(((((.((.....)).))))).)..)))..))).)).).)))))))..(-22.70)
novel_514	scaffold601	-27	395194	395256	+	62	54.8387	cuaacuguaguacaggggagau	22	45.4545	CACCCCAUGGACUGCAGCACGUCAGGCUUCCCUAUCCUGACUAACUGUAGUACAGGGGAGAU	..((((.((.(((((((...((((((.........))))))...))))))).))))))....(-27.00)
novel_516	scaffold250	-25.1	3217756	3217815	+	59	42.3729	uaaugggucuucuacuguugagg	23	43.4783	UAAUGGGUCUUCUACUGUUGAGGAGGUAUUGUUUUCCCAACAGGAAAGAGGACACUAUG	..(((((((((((.((((((.(((((......)))))))))))...))))))).)))).(-25.10)
novel_522	scaffold155	-16.9	2460144	2460195	-	51	47.0588	uuacgccugugugccacugaga	22	54.5455	UCAUAGGCACACGAGUUUGAAGAAAAAGCUUACGCCUGUGUGCCACUGAGA	(((..((((((((.((...(((......)))..)).))))))))..)))..(-16.90)
novel_525	scaffold30	-21.52	282245	282305	+	60	41.6667	uguagauccaugauucccucuu	22	40.9091	GAGGGCAUCUCUGUGGCUACAGAUGUUAACUAUUUUUCUGUAGAUCCAUGAUUCCCUCUU	(((((.(((...(((((((((((.............)))))))..))))))).)))))..(-21.52)
novel_528	scaffold203	-29.2	4945665	4945725	-	60	68.3333	cucucccgugccucugccucagc	23	69.5652	GCAGCCAGAGGCACGAGAGUGGCCCGCCGAUAUCAGGCUCUCCCGUGCCUCUGCCUCAGC	(.((.((((((((((.(((.((((...........))))))).)))))))))).)))...(-29.20)
novel_534	scaffold243	-24.42	1822	1887	+	65	58.4615	uugccugggcuguuucagugccacg	25	60	UUGCCUGGGCUGUUUCAGUGCCACGUGACCUUGUGAAGAAGGUGGAACAAGCGGCCCAUGUGGCC	..(((((((((((((..((.((((.(.............).)))).))))))))))))...))).(-24.42)
novel_535	scaffold34	-21.8	8743860	8743917	-	57	63.1579	ugcagccgacuuggggccugaga	23	65.2174	UGCAGCCGACUUGGGGCCUGAGAGGACACAGCUUCCAGACUCCUGUCUCCUGCCAGC	.((((..(((..((((.(((.((((......))))))).)))).)))..))))....(-21.80)
novel_537	scaffold82	-19.7	2982357	2982415	+	58	29.3103	uaaaguucauucggguuuuucu	22	31.8182	UAAAGUUCAUUCGGGUUUUUCUGUACCAUCUUAUGGAAAAAACCAAAUGAACUUUUUA	.((((((((((.((.((((((((((......)))))))))).)).))))))))))...(-19.70)
novel_538	scaffold360	-32.8	386443	386520	-	77	61.039	ucugccucccuucucuuguaga	22	50	GACAAGAGCAGGGAGAGCCAGUCUGGCCCAGCUCUGGAAGGGAGCGUCACCCCUCUCUGCCUCCCUUCUCUUGUAGA	.(((((((.((((((.((.((...((....(((((.....)))))......))...)))))))))).)))))))...(-32.80)
novel_540	scaffold12	-22.4	9213218	9213279	-	61	39.3443	uggccuuugacuguguuucaga	22	45.4545	UGAAACACAGUCAAGUUUUCCCUUCAUGAUAUCCUUUGAUGGCCUUUGACUGUGUUUCAGA	(((((((((((((((.....((.(((..........))).))..)))))))))))))))..(-22.40)
novel_541	scaffold501	-34.8	1291401	1291486	-	85	65.8824	guucagcugugccucugccugc	22	63.6364	AGGUGGGGUGCGCUGAGACGCCCAGCUCGUUACUGGGCCAGCGAAGGGGGAUGGGGGAGACAAGUUCAGCUGUGCCUCUGCCUGC	(((..(((..(((((((..((((((.......)))))).................(....)...)))))).)..)).)..)))..(-34.80)
novel_542	scaffold82	-15.2	1949496	1949532	-	36	52.7778	aucccaccgcugccaaga	18	61.1111	UUGGAGUUGUGGGUUUGAAUCCCACCGCUGCCAAGA	(((((((.(((((.......))))).))).))))..(-15.20)
novel_543	scaffold78	-24.1	3427632	3427686	+	54	50	agggcucaguaggaacuccuag	22	54.5455	AGGAUUCCUACAACCCUGGGUAAAUAAGGUCCAGGGCUCAGUAGGAACUCCUAG	(((((((((((..(((((((.........)))))))....))))))).))))..(-24.10)
novel_544	scaffold804	-26.8	240177	240231	-	54	55.5556	uuagcaacugagcaccaccacc	22	54.5455	UGGCGGGCUUCAGUUGCAGAGUCAGACGUGAUUUAGCAACUGAGCACCACCACC	(((.(((((.(((((((.((((((....)))))).)))))))))).)).)))..(-26.80)
novel_546	scaffold174	-23.6	735959	736024	+	65	40	aauugcacgguauccaucugug	22	45.4545	CGGGUGGAUCACGAUGCAAUUUUGAUUAGUAUAAUAGGAGAAAAAUUGCACGGUAUCCAUCUGUG	(((((((((..((.(((((((((..(((......)))....)))))))))))..)))))))))..(-23.60)
novel_548	scaffold87	-29.7	5606826	5606890	-	64	59.375	ugagcuaccagggaaccccggaca	24	62.5	ACCGGGGUCUCCUGCAUUGCAGGCGGAUUCUUUUACCAGCUGAGCUACCAGGGAACCCCGGACA	.(((((((..((((....((.(((((.........)).)))..))...))))..)))))))...(-29.70)
novel_552	scaffold102	-12.9	4288221	4288275	+	54	38.8889	agagaguucguuuggguuuuuc	22	40.9091	AGAGAGUUCGUUUGGGUUUUUCGGAAAGAUGGUAUGAAAGACUGGAGCAAAUAU	.........((((.(((((((((...........))))))))).))))......(-12.90)
novel_553	scaffold39	-26.3	1158622	1158675	-	53	26.4151	uuuguugucucuucagaauauc	22	31.8182	UUUGUUGUCUCUUCAGAAUAUCUAUUAAAGAUAUUCUGAACAGACAACAUAUU	..((((((((.((((((((((((.....)))))))))))).))))))))....(-26.30)
novel_559	scaffold24	-23	1322237	1322289	+	52	34.6154	uagaaaaacccagaugaacucu	22	36.3636	AGUUUGUUUGGGUUUUCCUGUAAGAUGUUAUAGAAAAACCCAGAUGAACUCU	((((..((((((((((.((((((....)))))).))))))))))..))))..(-23.00)
novel_561	scaffold376	-31.3	584464	584526	-	62	50	uuucccuggauucugcucugc	21	52.381	UUUCCCUGGAUUCUGCUCUGCUGGGUAUUGUUUCAGGAGAGCAGGAGUCAAGAAGGGAGACA	(((((((.(((((((((((.(((((......))))).)))))).)))))....)))))))..(-31.30)
novel_562	scaffold247	-23.42	2688089	2688151	-	62	53.2258	aacuuuugccccuaguaacggacu	24	45.8333	AACUUUUGCCCCUAGUAACGGACUGAGGGCAUGAGGAAGUCCGUGCAGGAGGCAAAGCAAAG	...((((((((((.(((.((((((.............)))))))))))).))))))).....(-23.42)
novel_566	scaffold166	-33.6	685899	685965	-	66	51.5152	agagauggcagguagacuggcu	22	54.5455	AGAGAUGGCAGGUAGACUGGCUCAUUACUUCUGCCUAAUGAGCCAGGCUCCAUGCCACCUCUCUAA	((((((((((((.((.(((((((((((........))))))))))).)))).)))))..)))))..(-33.60)
novel_571	scaffold914	-23.1	404896	404953	-	57	47.3684	uaucuguggauucacccaacc	21	47.619	UAUCUGUGGAUUCACCCAACCAAGGAUCGAGGUUGGUUGGUUGAAUCUGAGGAUGCA	(((((.((((((((.((((((((.........)))))))).)))))))).)))))..(-23.10)
novel_574	scaffold84	-19.1	3414586	3414647	+	61	54.0984	uugcuggagcuggagagaccucc	23	60.8696	UGGUCCACCCGGCACCAUCUAAUCAGAACAGAAACAGAUUGCUGGAGCUGGAGAGACCUCC	.((((...(((((.(((..(((((............))))).))).)))))...))))...(-19.10)
novel_576	scaffold48	-31.6	720450	720532	-	82	48.7805	aaucuaggucuggaugaaccagu	23	43.4783	AAUCUAGGUCUGGAUGAACCAGUGAAGACAUGCUUUGCGAUCAUGCCAUCUGCCAUCACCGGUUCAACCAGACCCAGGUUUA	(((((.(((((((.((((((.(((((((...((...........))..)))....)))).)))))).))))))).)))))..(-31.60)
novel_579	scaffold206	-29.82	308708	308780	+	72	75	ccuccccuccguuccccu	18	72.2222	GGGCAGGGGGGGCCCAGAGGGCUGCCUGCUCCCCCCUCACCUGCUUCCAGCCUCCCUCCCCUCCGUUCCCCU	(((..(((((((....(..(((((...((.............))...)))))..)..)))))))...)))..(-29.82)
novel_581	scaffold229	-21.1	1207337	1207400	+	63	38.0952	agauccauaaauaacuacugua	22	27.2727	AGAUCCAUAAAUAACUACUGUAGCCUGUGCUGUGGUUUUUCCAGUAGUCAUAUAUGGAUGUGA	..(((((((.((.(((((((.((((........))))....))))))).)).)))))))....(-21.10)
novel_582	scaffold584	-20.1	728743	728812	-	69	47.8261	ucugcuguagucuguagc	18	50	UGUGCUUCUACUGCAGGGGCCAUGGGUUUGAUUCCUGGUCAAAACUAAGAUUCUGCUGUAGUCUGUAGC	..(((..((((.((((((..(.(((.((((((.....)))))).))).).)))))).))))...)))..(-20.10)
novel_586	scaffold7	-17.1	6290809	6290854	-	45	51.1111	gcggcgcgggaugggaagaga	21	71.4286	UCUCUUAUUUUGUGUUCGCCUUUAGCGGCGCGGGAUGGGAAGAGA	(((((((((((((((.(((.....))))))))))))))).)))..(-17.10)
novel_590	scaffold14	-17.4	3711508	3711566	-	58	36.2069	gaaagcucauucggauuuuu	20	35	GAAAGCUCAUUCGGAUUUUUCCAUACAAGUGCACAGAAAAACUCAAAUGAGCUUUUUG	(((((((((((.(..(((((((((....)))....))))))..).)))))))))))..(-17.40)
novel_591	scaffold90	-30.5	1001538	1001602	+	64	65.625	agagacagcugucccgaccucac	23	60.8696	CUGGUCGGUGCAUGCUGACUCCUGGUCCCGGAUCCCGCUCCAGAGACAGCUGUCCCGACCUCAC	..((((((..((.((((.(((.(((...(((...)))..)))))).))))))..))))))....(-30.50)
novel_592	scaffold2	-29.8	320156	320212	+	56	51.7857	uucagccucuacccuuccacc	21	57.1429	GGGAAGGGUAGUGGACAAACCUUGUACAGAAAAGGUUCAGCCUCUACCCUUCCACC	.((((((((((.((...((((((........))))))...)).))))))))))...(-29.80)
novel_595	scaffold18	-17.2	932922	932976	+	54	46.2963	uuggcuggauaucauauucucu	22	36.3636	AGUGUGCUAUGUAGCCUCAGGGAGUUGACCUCUUGGCUGGAUAUCAUAUUCUCU	((((((.(((.(((((..(((.......)))...))))).))).))))))....(-17.20)
novel_597	scaffold6	-18.8	5396299	5396356	-	57	42.1053	uaaaaccggaaggaacucuuug	22	40.9091	AAAGCCCUUUCUGGUUUUUCCGUAAGAUGUCAUGGUAAAACCGGAAGGAACUCUUUG	......((((((((((((.((((........)))).)))))))))))).........(-18.80)
novel_60	scaffold1016	-24.5	193253	193315	-	62	50	augcaccugggcaaggauucugg	23	56.5217	UAAUCCUUGCUACCUGGGUGAGAGUGCUUUCUGAAUGCAAUGCACCUGGGCAAGGAUUCUGG	.(((((((((...(..((((....(((.........)))...))))..))))))))))....(-24.50)
novel_602	scaffold848	-16.4	268919	268975	-	56	37.5	ggugaugaugauacugcugaca	22	45.4545	UCAGGAGUUUUCAGAAACAUCAGAUAUUAUUCCUGGUGAUGAUGAUACUGCUGACA	((((.(((..(((..(.((((((.........)))))).)..))).))).))))..(-16.40)
novel_606	scaffold16	-19.7	7753762	7753814	+	52	53.8462	cugggugugcugugucuuucaga	23	52.1739	UGCAAGACUCUGCCACCCAUCUCUACCUGCUGGGUGUGCUGUGUCUUUCAGA	((.(((((.(.((((((((.(.......).)))))).)).).))))).))..(-19.70)
novel_607	scaffold101	-27.8	7581429	7581488	-	59	71.1864	cgcacggggucagcggca	18	77.7778	CGCACGGGGUCAGCGGCAGCGACGCGAUGGAGCACAGCGCAGGGCUGACUGUGUGUGCG	((((((.(((((((.((.((...((......))...))))...))))))).))))))..(-27.80)
novel_613	scaffold212	-28.2	231160	231215	+	55	67.2727	uuggagcccccugccgaguacgga	24	66.6667	UUGGAGCCCCCUGCCGAGUACGGACACUCCUCCGUCUUGCAGGCGCGGGACUCCA	.(((((((((((((.(((.(((((......)))))))))))))...))).)))))(-28.20)
novel_616	scaffold98	-23.5	3358327	3358384	-	57	54.386	acagaccagucugcuucccuuu	22	50	GAGUGGGAGUGCUGGUUCAGUGGGAAAGUUGCACCACAGACCAGUCUGCUUCCCUUU	(((.(((((((((((((..((((..........)))).)))))))..))))))))).(-23.50)
novel_621	scaffold58	-35.4	893324	893393	-	69	73.913	acccucuccuuuccggcugcaga	23	60.8696	UGCGGUGGGUGGGCAGGGCCGGCGGGAGUGUGCUGCGCCCCGACGCACCCUCUCCUUUCCGGCUGCAGA	((((((.((.(((.((((.((.((((.(((.....))))))).))..)))).)))...)).))))))..(-35.40)
novel_622	scaffold298	-28.5	2234726	2234785	+	59	55.9322	uuccuggaggcgaaaucugcu	21	52.381	UUCCUGGAGGCGAAAUCUGCUCUGUGGAAAGGCAGGGAGCAGGUUGGCUUCCCAGAUUC	...((((((((..((((((((((.((......)).)))))))))).)))).))))....(-28.50)
novel_623	scaffold274	-18.8	2522115	2522166	+	51	47.0588	guuuccgugguguaguggcuauc	23	52.1739	UAUGUCACUAUGCAUCACCAGCCAUAUGGUUUCCGUGGUGUAGUGGCUAUC	...((((((..(((((((.((((....))))...)))))))))))))....(-18.80)
novel_627	scaffold56	-28.9	4314872	4314949	-	77	31.1688	ugugaucgucguuauaauaaga	22	31.8182	UGUGAUCGUCGUUAUAAUAAGAAAUUACAGUACAUAUUAGGUCCUGUGCAAUUUCUUACUAUAAUGAUGAUGACACA	(((.((((((((((((.(((((((((((((.((.......)).)))))..)))))))).)))))))))))).)))..(-28.90)
novel_629	scaffold38	-26.9	2836970	2837029	+	59	42.3729	uuggagaacucuuggagacuga	22	45.4545	AGUCUCCUUGACUUUUCCAAGUUUCAUGACGAGUUACUUGGAGAACUCUUGGAGACUGA	(((((((..((.((((((((((..(.......)..)))))))))).))..)))))))..(-26.90)
novel_630	scaffold376	-21.4	1904646	1904702	-	56	62.5	uggccuggccucugccccagg	21	76.1905	UUGAGGGCCAGUAUCCUGGCCACAUGGAACUGACAUGGCCUGGCCUCUGCCCCAGG	(((.((((.((...((.(((((..((.......))))))).))...))))))))).(-21.40)
novel_632	scaffold42	-33	4708631	4708708	+	77	66.2338	ucccaucucugcgcccucccagu	23	65.2174	UGGGUUGCCUGGUUGGGAUGGUGGGAGGGUCAGGGCUGCAGCCAAGACGGGGUCUCCCAUCUCUGCGCCCUCCCAGU	........((((..(((..((((((((((((..(((....)))..)))....)))))))))......)))..)))).(-33.00)
novel_633	scaffold234	-46.9	3046603	3046687	+	84	71.4286	cgugcugucugcucuccgcgc	21	71.4286	GUGGAGGUAGGCACUUGGCGGGUCCCCGGGUGGCAGACGCCACCGCUGCACACACCUGGUCCCCGUGCUGUCUGCUCUCCGCGC	(((((((((((((....(((((..((.(((((((((.((....)))))).))).)).))..)))))..))))))).))))))..(-46.90)
novel_638	scaffold20	-26.2	1462029	1462085	+	56	71.4286	cgggcucgcggcugagaucuggg	23	73.913	CUGGACUGUAGGCGGAGAGGCCUGGUGGGGACCCGGGCUCGCGGCUGAGAUCUGGG	(..((((.(((.((..(((.(((((.(....))))))))).)).))))).))..).(-26.20)
novel_639	scaffold45	-43.8	2569227	2569292	+	65	63.0769	aggcucuugggcggacuuccucg	23	65.2174	AGGCUCUUGGGCGGACUUCCUCGACCUCACUUGCUUGGGUCCAGGAACCCCGCCCGAGAGCCUUU	((((((((((((((..(((((.((((.((......)))))).)))))..))))))))))))))..(-43.80)
novel_641	scaffold194	-18.44	1862356	1862428	-	72	41.6667	uucuguggauuugaaccucc	20	45	UUCUGUGGAUUUGAACCUCCGCAUUUCUAACCUAAGAUCUUGAAAUGCAUUGUGAUUCCUGUCCACUGGACU	(((.((((((..(((((...(((((((..............)))))))...).).)))..)))))).)))..(-18.44)
novel_643	scaffold403	-20.74	1423900	1423960	-	60	61.6667	ccuguguucucuccacucccagc	23	60.8696	CCUGUGUUCUCUCCACUCCCAGCUCCAGCAAGGAAGCUGCCACCCAAGCGAGCAGAGGGA	(((.(((((.((.......(((((((.....)).))))).......)).))))).)))..(-20.74)
novel_647	scaffold22	-19.5	2074408	2074466	-	58	31.0345	gaaaguucauguagguuuuucu	22	31.8182	GAAAGUUCAUGUAGGUUUUUCUAUAGCAUCUAACGGAAAAACCCAAAUGAACUUUUUA	((((((((((...(((((((((.(((...)))..)))))))))...))))))))))..(-19.50)
novel_652	scaffold120	-19	3198431	3198484	+	53	64.1509	accgcgucaguugagccugcg	21	66.6667	ACCGCGUCAGUUGAGCCUGCGUAUUGGCGGCAACGACGGGAGCGAGAUGCUGG	.(((((((.((((.(((........)))..))))..((....)).))))).))(-19.00)
novel_656	scaffold302	-23.16	1556800	1556880	+	80	35	aaaagggaaaugaguuugaacu	22	31.8182	UUCAAACAAGUUUCCCUGUGUUGAGCACCAAACCAUGUAAUGUAACUUGGACUUUAAUAAAAGGGAAAUGAGUUUGAACU	(((((((..((((((((.(((((((..((((...............))))..)))))))..))))))))..)))))))..(-23.16)
novel_659	scaffold26	-41	2941396	2941453	-	57	78.9474	caccucacucccagcccgccacgc	24	75	CAGGGGGGCUGGCGGCUGGGGUGGCUGGGUGGCCACCUCACUCCCAGCCCGCCACGC	..((.(((((((.(..((((((((((....))))))))))..)))))))).))....(-41.00)
novel_660	scaffold661	-18.9	655836	655910	+	74	43.2432	gacaggucucagguagcuuu	20	50	GGCACCUUCUGACCUAUCCCUUUAUAUCAAUUUCCUGAGAGAAGCUGUUUUGAAGACAGGUCUCAGGUAGCUUU	(((((((...(((((....(((((...((.((((......)))).))...)))))..)))))..)))).)))..(-18.90)
novel_665	scaffold638	-14.8	314469	314546	-	77	36.3636	cuguuucuaacuugcugcuc	20	45	CUGUUUCUAACUUGCUGCUCAUAAUGUAUAUGGAUUUAACAUGCUGUGUAAGCUGUGUCCUAGUUACUGAACAGUUU	((((((.(((((...(((.......)))...((((...(((.(((.....)))))))))).)))))..))))))...(-14.80)
novel_668	scaffold254	-19.4	2015572	2015633	+	61	40.9836	aacauuggacuacguagugguga	23	43.4783	CUCACUCCUAGUUUAAUGGUGGAUCACUAAGUUUAUCCAACAUUGGACUACGUAGUGGUGA	.((((((.((((((((((.(((((..........))))).)))))))))).).)))))...(-19.40)
novel_669	scaffold13	-25.4	2599954	2600031	-	77	42.8571	ugugguucuguaggacuuccuacgc	25	52	UUAGGAAGUUUUACUGUAUCAUCACUAAAUCUCUUGGGCGUGGUAAGGAGAAUGUGGUUCUGUAGGACUUCCUACGC	.(((((((((((((.(....(((((....((((((..........))))))..))))).).)))))))))))))...(-25.40)
novel_67	scaffold164	-30.9	1591922	1591980	-	58	58.6207	cacgcucaugcacacacccaca	22	59.0909	UGAGUGUGUGUGUGUGAGUGUGUGUCGCUCCGGGUCCACGCUCAUGCACACACCCACA	...(.(((((((((((((((((..((......))..))))))))))))))))).)...(-30.90)
novel_671	scaffold111	-32.4	20617	20689	+	72	48.6111	uuugccgguuguguccgauucu	22	50	AGUCGGACACGACUGAGCGACUGAACUGAACUGAAUUCCUACUCAAGUCAUUUGCCGGUUGUGUCCGAUUCU	(((((((((((((((.((((.(((..(((...(.....)...)))..))).)))))))))))))))))))..(-32.40)
novel_73	scaffold429	-13.7	1781146	1781208	-	62	33.871	aagugcuugcuuacaucacaaua	23	34.7826	AAGUGCUUGCUUACAUCACAAUAUCCAGUUAAUGUAGCUUAAUAUUAAAGCAAGGCACUGAA	.(((((((((((.......(((((..(((((...)))))..))))).)))))).)))))...(-13.70)
novel_84	scaffold259	-24.3	1611537	1611603	+	66	36.3636	uagcagcacguaaauauuggcg	22	45.4545	UAGCAGCACGUAAAUAUUGGCGUUAAGAUUCUAAAAUUAUCUCCAGUAUUAACUGUGCUGCUGAAG	(((((((((((.((((((((.(.(((..........))).).)))))))).)).)))))))))...(-24.30)
novel_85	scaffold67	-20	5210962	5211018	-	56	57.1429	agcuuggaugccuugacucugu	22	50	AGCUUGGAUGCCUUGACUCUGUGGGGAUUCAGUCCAGAGUGGGGCCUCCUAGAUCC	..((.(((.(((((.((((((.((........))))))))))))).))).))....(-20.00)
