# Supplementary material for: Identification of Potential miRNA–mRNA Regulatory Network Associated with Growth and Development of Hair Follicles in Forest Musk Deer
Source: Animals (Basel). 2023 Dec 15;13(24):3869. doi: 10.3390/ani13243869 (PMC10740511; doi:10.3390/ani13243869)
Supplement: Supplementary file 1 [file animals-13-03869-s001.zip › Supplementary Table S13.xlsx]

## Sheet: Sheet1
Supplementary Table S13 The lists of DE known miRNAs of HFs (pvalue<0.05 and |log2(fold change)|>1) in the anagen stage vs. catagen stage in the FMD
miRNA_id	average TPM of hair follicle at anagen stage	average TPM of hair follicle at catagen stage	log2FoldChange	Pvalue	regulate	significant
miR-1	202.581	69.1933	1.54966	0.00281091	up	yes
miR-11989	1.44	3.95667	-1.45187	0.0155546	down	yes
miR-1247-3p	4.73	20.5133	-2.11431	0.0291422	down	yes
miR-1247-5p	12.4757	44.5633	-1.8359	0.00472912	down	yes
miR-125	1742.88	4800.45	-1.46169	0.00107065	down	yes
miR-125a	542.697	1538.6	-1.50338	0.000374679	down	yes
miR-125a-3p	3.24143	8.75	-1.42986	0.00337869	down	yes
miR-125a-5p	22.8086	418.913	-4.19841	1.91023e-08	down	yes
miR-125b	1719.96	4702.77	-1.45113	0.00115012	down	yes
miR-125b-5p	1742.88	4800.45	-1.46169	0.00107065	down	yes
miR-125c-5p	1.27571	8.30667	-2.69344	0.000200462	down	yes
miR-126	191.317	65.9567	1.53623	0.0377615	up	yes
miR-126-3p	191.291	65.9567	1.53604	0.0378249	up	yes
miR-126a	125.157	19.57	2.6764	0.0235141	up	yes
miR-130a-3p	14.2157	36.1467	-1.34576	0.0301985	down	yes
miR-133-3p	44.0229	108.947	-1.3071	0.0324157	down	yes
miR-133a-3p	44.0229	108.947	-1.3071	0.0324157	down	yes
miR-136	1.36857	0.16	3.01957	0.0437221	up	yes
miR-138	243.866	779.41	-1.67625	0.00237392	down	yes
miR-138a	243.866	779.41	-1.67625	0.00237392	down	yes
miR-1-3p	8.16286	2.64333	1.62303	0.00504876	up	yes
miR-1468	57.3871	123.19	-1.10195	0.0055767	down	yes
miR-146a-5p	29.5057	78.9633	-1.41988	0.0296606	down	yes
miR-146b-5p	2697.84	17753.8	-2.71825	0.000327174	down	yes
miR-148a-5p	189.783	579.277	-1.60985	0.00495646	down	yes
miR-149	560.541	1235.15	-1.13978	0.00039381	down	yes
miR-149-5p	560.573	1235.83	-1.1405	0.000391318	down	yes
miR-152-5p	36.3914	85.6867	-1.23524	2.19049e-05	down	yes
miR-17-3p	20.7543	44.1667	-1.08918	0.0362727	down	yes
miR-181a	1338.61	3119.31	-1.22048	0.00120667	down	yes
miR-181a-5p	1339.3	3121.47	-1.22074	0.00121077	down	yes
miR-181c-3p	5.33571	12.7267	-1.25253	0.041766	down	yes
miR-184	563.457	1519.82	-1.43151	0.0184856	down	yes
miR-193a-3p	12.6186	41.2433	-1.70782	0.0206115	down	yes
miR-193a-5p	90.7214	188.76	-1.05696	0.0075195	down	yes
miR-193b	26.6957	63.9733	-1.26055	0.0134986	down	yes
miR-193b-3p	629.476	2269.61	-1.8502	8.59855e-05	down	yes
miR-193b-5p	26.6714	63.8767	-1.25968	0.0134513	down	yes
miR-196b-5p	1.61429	0.0633333	4.46919	0.00251093	up	yes
miR-196c-5p	8.05143	3.45333	1.21887	0.00138587	up	yes
miR-205	18824.3	39553.1	-1.07119	0.00342083	down	yes
miR-205-5p	18824.1	39553.1	-1.07121	0.00342046	down	yes
miR-205b-5p	4.67	11.1633	-1.25548	0.0331863	down	yes
miR-210	5.45714	11.31	-1.05001	0.0130899	down	yes
miR-21c	0.761429	0	6.26946	0.0306971	up	yes
miR-22-3p	2090.36	4351.12	-1.05763	0.00569348	down	yes
miR-2284aa	1.68	4.21333	-1.32136	0.0360242	down	yes
miR-23b-5p	23.5143	67.59	-1.52287	0.00693506	down	yes
miR-24-1-5p	300.036	631.58	-1.07381	0.0273982	down	yes
miR-24-2-5p	299.957	631.183	-1.07328	0.0276257	down	yes
miR-2483-5p	3.25429	9.56	-1.55175	0.035447	down	yes
miR-24c	5.94	710.44	-6.8997	7.98231e-07	down	yes
miR-263a-5p	32.7457	306.72	-3.22715	4.20446e-05	down	yes
miR-28-5p	79.8686	213.95	-1.42146	0.0098614	down	yes
miR-2887	0.614286	3.33333	-2.42101	0.0177006	down	yes
miR-28c	79.8429	213.95	-1.42193	0.00980739	down	yes
miR-29b-2-5p	2.16	5.15667	-1.25154	0.027823	down	yes
miR-320a-3p	729.719	2167.28	-1.57046	7.53552e-05	down	yes
miR-323	2.8	1.37	1.0259	0.0163974	up	yes
miR-324-3p	16.1557	33.27	-1.04172	0.00870034	down	yes
miR-324-5p	27.8529	65.8	-1.23996	0.0260606	down	yes
miR-326	1.95429	6.01667	-1.61736	0.0385726	down	yes
miR-331-3p	140.977	337.383	-1.25887	0.00226088	down	yes
miR-3432a	17.0271	35.1933	-1.04703	0.0151623	down	yes
miR-34a-5p	10.03	60.9133	-2.60124	9.82105e-05	down	yes
miR-34b-5p	2.34429	14.32	-2.60568	0.00551005	down	yes
miR-34c-3p	0.32	2.61333	-2.99086	0.016023	down	yes
miR-34c-5p	10.03	60.9133	-2.60124	9.82105e-05	down	yes
miR-361-3p	18.9586	43.7067	-1.20457	0.0100184	down	yes
miR-362	146.296	358.73	-1.29395	0.00182842	down	yes
miR-362-5p	145.987	357.783	-1.29319	0.0018169	down	yes
miR-365-1-5p	45.2014	122.24	-1.43508	0.0261396	down	yes
miR-365-3p	29.5686	74.2767	-1.32855	0.000864083	down	yes
miR-365-5p	46.2214	124	-1.42351	0.0283341	down	yes
miR-365a	29.5929	74.2767	-1.32737	0.000881839	down	yes
miR-369-5p	0.928571	0.19	2.23047	0.0431106	up	yes
miR-370	1.57857	5.76667	-1.86251	0.00509098	down	yes
miR-374a	54.2071	22.8433	1.24634	7.30592e-07	up	yes
miR-375	40.7	97.56	-1.26105	0.0191443	down	yes
miR-378a-3p	7993.94	16460.5	-1.04202	0.000159621	down	yes
miR-383-5p	0.475714	1.92	-1.99042	0.0470477	down	yes
miR-3959-5p	1.35429	0.38	1.8066	0.0277646	up	yes
miR-422a	7.9	19.0533	-1.26905	0.0011038	down	yes
miR-425	230.15	512.17	-1.15401	0.0174076	down	yes
miR-425-5p	230.179	512.233	-1.15401	0.0173889	down	yes
miR-502b-5p	3.79	10.9833	-1.53256	0.0255619	down	yes
miR-504	13.0671	54.0833	-2.0484	0.00534183	down	yes
miR-509	28.45	0.0966667	8.05968	0.00503381	up	yes
miR-509a-5p	0.725714	0	6.20107	0.0469152	up	yes
miR-5100	2.32857	6.59	-1.49684	0.0375625	down	yes
miR-514a	2.43714	0	7.93495	0.0497076	up	yes
miR-542-5p	7.89571	23.2733	-1.55833	0.00117228	down	yes
miR-592	3.90143	1.58	1.29867	0.0356555	up	yes
miR-6529-5p	90.5857	229.577	-1.34152	0.00140564	down	yes
miR-660	2.52571	0	7.98625	0.0303931	up	yes
miR-708	308.497	829.67	-1.42725	0.0137686	down	yes
miR-877	45.9286	111.73	-1.28237	0.0364329	down	yes
miR-877-5p	45.29	111.413	-1.29847	0.0332868	down	yes
miR-9-5p	596.874	268.013	1.15509	0.00216205	up	yes
miR-9985	6.60857	2.75	1.26185	0.000113574	up	yes
miR-99b-5p	163.641	1154.55	-2.81864	5.66334e-05	down	yes
miR-9a	607.6	271.403	1.16265	0.00203392	up	yes
novel-1016a	6.69	27.4467	-2.03492	0.000807874	down	yes
novel-1016b	128.651	318.663	-1.3085	0.0116811	down	yes
novel-1019	1.61571	4.88667	-1.59073	0.0327788	down	yes
novel-103	0.965714	4.17667	-2.10127	0.0201333	down	yes
novel-107	0.484286	1.97333	-2.00451	0.0462528	down	yes
novel-110	24.1814	90.2867	-1.90018	0.00884192	down	yes
novel-120	1.16571	3.59667	-1.61713	0.0289781	down	yes
novel-125	37.6443	92.2733	-1.29326	0.0495221	down	yes
novel-128a	0.11	0.926667	-2.9645	0.0448618	down	yes
novel-128b	0.56	0	5.83289	0.0214004	up	yes
novel-129a	0.852857	2.97	-1.78812	0.0450415	down	yes
novel-129b	533.309	241.427	1.14335	0.000709992	up	yes
novel-13a	5.7	27.2467	-2.25505	0.00852545	down	yes
novel-13b	1.38571	5.12	-1.87796	0.0109649	down	yes
novel-13c	2.51143	1.21333	1.04342	0.00422617	up	yes
novel-13d	1.35857	0.6	1.16579	0.0483207	up	yes
novel-13e	60.5757	17.2733	1.8096	2.73266e-05	up	yes
novel-137	4.70286	11.67	-1.30937	0.0110552	down	yes
novel-1387	1.47714	0.556667	1.39197	0.0308938	up	yes
novel-140	1176.04	2775.13	-1.23861	0.0127239	down	yes
novel-1434	1.17714	3.72667	-1.65426	0.0373132	down	yes
novel-148	533.107	241.337	1.14335	0.000717513	up	yes
novel-159	2.62	8.44333	-1.68446	0.0411054	down	yes
novel-167	2.43857	16.36	-2.74104	0.0160585	down	yes
novel-1709	8.66286	19.25	-1.15103	0.0358865	down	yes
novel-171	3.56571	14.0133	-1.97153	0.0491544	down	yes
novel-176	0.518571	3.56333	-2.7571	0.00333187	down	yes
novel-18	3.45857	10.5133	-1.60118	0.0471706	down	yes
novel-186	2.43857	16.36	-2.74104	0.0160585	down	yes
novel-190a	3.23714	8.87	-1.45139	0.0228782	down	yes
novel-190b	3.41143	1.40333	1.2755	0.0132751	up	yes
novel-204	70.1457	188.63	-1.427	0.00690757	down	yes
novel-209	25.3843	54.2467	-1.0953	0.0157356	down	yes
novel-215	1907.6	4032.01	-1.07973	0.0359175	down	yes
novel-220	1.72	7.02333	-2.02344	0.00310987	down	yes
novel-230	9026.97	18604	-1.04329	0.00680051	down	yes
novel-234a	2.53571	8.79333	-1.78998	0.0174725	down	yes
novel-234b	477.039	1369.92	-1.5219	0.00317753	down	yes
novel-241	1.44143	0.0566667	4.44436	0.000968838	up	yes
novel-247	3.46143	9.23333	-1.41288	0.0477029	down	yes
novel-250	79.9529	205.14	-1.35928	0.00514221	down	yes
novel-255	1247.18	3932.64	-1.65682	0.00178185	down	yes
novel-274	75.9171	34.57	1.13468	0.0421874	up	yes
novel-278a	11.1429	37.1167	-1.73504	0.0188372	down	yes
novel-278b	80.3471	169.457	-1.0765	0.0454893	down	yes
novel-29	16278	34397.2	-1.07936	0.0391093	down	yes
novel-295	1.63	5.67333	-1.79304	0.015813	down	yes
novel-298	0.05	0.836667	-3.81876	0.0139045	down	yes
novel-30	174.553	60.1967	1.53575	0.0468317	up	yes
novel-33	39.29	109.627	-1.48013	0.0488417	down	yes
novel-369	0.0214286	0.64	-4.37029	0.0336962	down	yes
novel-384	0.945714	3.69333	-1.95417	0.0476669	down	yes
novel-38740	3.23714	8.87	-1.45139	0.0228782	down	yes
novel-394	204.823	504.8	-1.30129	0.0286728	down	yes
novel-4138	1.17714	3.72667	-1.65426	0.0373132	down	yes
novel-424	2.43857	16.36	-2.74104	0.0155014	down	yes
novel-434	0.208571	1.12667	-2.37863	0.032443	down	yes
novel-44	3.52286	13.3367	-1.91757	0.00957504	down	yes
novel-450	511.884	1401.18	-1.45274	0.0419383	down	yes
novel-471	3.57286	13.3367	-1.8973	0.0184099	down	yes
novel-47249	1.17714	3.72667	-1.65426	0.0373132	down	yes
novel-49	0.232857	1.41667	-2.55447	0.0373444	down	yes
novel-513	11.6671	48.3633	-2.05052	0.013012	down	yes
novel-544	606.504	2315.78	-1.93289	0.00038287	down	yes
novel-563	2.50714	8.87667	-1.81986	0.0177806	down	yes
novel-572	13.4386	39.0133	-1.53688	0.00871227	down	yes
novel-586	128.296	308.473	-1.26561	0.0345346	down	yes
novel-6	0.0985714	0.96	-3.15934	0.0177522	down	yes
novel-604	29.0929	80.35	-1.46532	0.0482529	down	yes
novel-606	0.125714	1.08	-3.00568	0.023461	down	yes
novel-66	3.25714	8.87667	-1.44361	0.00857139	down	yes
novel-67	218.909	708.29	-1.69397	0.00501781	down	yes
novel-695	7.45429	22.3633	-1.5837	0.0201783	down	yes
novel-71	0.378571	2.58667	-2.74041	0.0191858	down	yes
novel-72	1525.09	4220.13	-1.46839	0.00770211	down	yes
novel-74	533.107	241.337	1.14335	0.000707477	up	yes
novel-747	1.43857	4.71333	-1.70517	0.0100052	down	yes
novel-758	221.061	594.463	-1.4271	0.0273726	down	yes
novel-788	50.6714	110.583	-1.12574	0.0367935	down	yes
novel-79	1176.42	2775.74	-1.23846	0.0119297	down	yes
novel-80a	9.03143	56.4	-2.64133	0.000250947	down	yes
novel-80b	0.267143	1.30667	-2.24819	0.0076198	down	yes
novel-829	2.34571	16.0933	-2.77312	0.0185506	down	yes
novel-995	1517.58	4199.68	-1.46851	0.0153178	down	yes
