# Supplementary material for: Identification of Potential miRNA–mRNA Regulatory Network Associated with Growth and Development of Hair Follicles in Forest Musk Deer
Source: Animals (Basel). 2023 Dec 15;13(24):3869. doi: 10.3390/ani13243869 (PMC10740511; doi:10.3390/ani13243869)
Supplement: Supplementary file 1 [file animals-13-03869-s001.zip › Supplementary Table S14.xlsx]

## Sheet: Sheet1
Table S14 GO enrichment analysis of DEmiRNA target genes in the HFs of FMD at the anagen stage and catagen stage
TermID	Description	Category	GeneRatio	BgRatio	Enrich_factor	P_value	P_adjust	GeneCount
GO:0048856	anatomical structure development	biological_process	3159/12078	4359/18422	1.10536	5.66179e-29	3.42745e-25	3159
GO:0007275	multicellular organism development	biological_process	2946/12078	4047/18422	1.1103	6.51302e-29	3.42745e-25	2946
GO:0032502	developmental process	biological_process	3388/12078	4697/18422	1.10018	7.34872e-29	3.42745e-25	3388
GO:0048731	system development	biological_process	2566/12078	3502/18422	1.11759	1.365e-27	5.09308e-24	2566
GO:0009653	anatomical structure morphogenesis	biological_process	1342/12078	1782/18422	1.14865	6.55208e-21	1.74622e-17	1342
GO:0048513	animal organ development	biological_process	1771/12078	2414/18422	1.11898	7.83942e-19	1.62502e-15	1771
GO:0030154	cell differentiation	biological_process	2210/12078	3059/18422	1.10193	3.41976e-18	6.37991e-15	2210
GO:0048869	cellular developmental process	biological_process	2256/12078	3130/18422	1.09935	8.5674e-18	1.45303e-14	2256
GO:0050793	regulation of developmental process	biological_process	1492/12078	2030/18422	1.12102	2.73484e-16	4.25176e-13	1492
GO:0007399	nervous system development	biological_process	1443/12078	1960/18422	1.12293	3.49092e-16	5.00974e-13	1443
GO:0032501	multicellular organismal process	biological_process	3970/12078	5693/18422	1.06363	6.2408e-16	8.31631e-13	3970
GO:0051239	regulation of multicellular organismal process	biological_process	1662/12078	2283/18422	1.11037	1.65758e-15	2.01119e-12	1662
GO:2000026	regulation of multicellular organismal development	biological_process	1145/12078	1538/18422	1.13551	3.07049e-15	3.1824e-12	1145
GO:0048518	positive regulation of biological process	biological_process	3248/12078	4625/18422	1.07114	4.36618e-15	4.13752e-12	3248
GO:0048522	positive regulation of cellular process	biological_process	2897/12078	4122/18422	1.07197	1.68187e-13	1.49414e-10	2897
GO:0009888	tissue development	biological_process	959/12078	1286/18422	1.13742	3.47786e-13	2.821e-10	959
GO:0023051	regulation of signaling	biological_process	1922/12078	2686/18422	1.09141	4.62319e-13	3.59376e-10	1922
GO:0010646	regulation of cell communication	biological_process	1905/12078	2662/18422	1.09151	5.73035e-13	4.27622e-10	1905
GO:0022008	neurogenesis	biological_process	1030/12078	1393/18422	1.12779	1.73456e-12	1.24461e-09	1030
GO:0035556	intracellular signal transduction	biological_process	938/12078	1264/18422	1.13187	4.62488e-12	2.87606e-09	938
GO:0009966	regulation of signal transduction	biological_process	1718/12078	2398/18422	1.09274	5.81977e-12	3.39293e-09	1718
GO:0032879	regulation of localization	biological_process	1492/12078	2069/18422	1.09989	8.59284e-12	4.71494e-09	1492
GO:0060284	regulation of cell development	biological_process	567/12078	739/18422	1.17025	1.21326e-11	6.46704e-09	567
GO:0048699	generation of neurons	biological_process	961/12078	1301/18422	1.12665	1.54382e-11	8.00042e-09	961
GO:0051179	localization	biological_process	3076/12078	4415/18422	1.06267	1.83545e-11	8.78004e-09	3076
GO:0045595	regulation of cell differentiation	biological_process	1063/12078	1449/18422	1.11894	2.02114e-11	9.36875e-09	1063
GO:0051960	regulation of nervous system development	biological_process	546/12078	711/18422	1.17129	2.27435e-11	1.01024e-08	546
GO:0048583	regulation of response to stimulus	biological_process	2194/12078	3108/18422	1.07671	3.61153e-11	1.53129e-08	2194
GO:0022610	biological adhesion	biological_process	604/12078	794/18422	1.16027	3.72469e-11	1.54417e-08	604
GO:0007155	cell adhesion	biological_process	599/12078	787/18422	1.1609	3.82098e-11	1.54966e-08	599
GO:0000902	cell morphogenesis	biological_process	445/12078	572/18422	1.1866	6.50093e-11	2.42563e-08	445
GO:0031323	regulation of cellular metabolic process	biological_process	3363/12078	4853/18422	1.05696	7.79415e-11	2.74354e-08	3363
GO:0080090	regulation of primary metabolic process	biological_process	3262/12078	4704/18422	1.05769	1.09392e-10	3.64431e-08	3262
GO:0048523	negative regulation of cellular process	biological_process	2579/12078	3686/18422	1.06718	1.27092e-10	4.08796e-08	2579
GO:0031325	positive regulation of cellular metabolic process	biological_process	1723/12078	2421/18422	1.08551	1.68515e-10	5.32851e-08	1723
GO:0007166	cell surface receptor signaling pathway	biological_process	1185/12078	1634/18422	1.10613	1.74931e-10	5.43918e-08	1185
GO:0050794	regulation of cellular process	biological_process	6206/12078	9158/18422	1.0336	2.14694e-10	6.56613e-08	6206
GO:0060429	epithelium development	biological_process	601/12078	795/18422	1.15305	2.63987e-10	7.94346e-08	601
GO:0051171	regulation of nitrogen compound metabolic process	biological_process	3175/12078	4581/18422	1.05712	3.32395e-10	9.84312e-08	3175
GO:0051128	regulation of cellular component organization	biological_process	1481/12078	2070/18422	1.09126	4.21268e-10	1.228e-07	1481
GO:0009893	positive regulation of metabolic process	biological_process	1847/12078	2609/18422	1.07978	4.89415e-10	1.4047e-07	1847
GO:0045893	positive regulation of transcription, DNA-templated	biological_process	843/12078	1143/18422	1.12492	5.06569e-10	1.4168e-07	843
GO:0050767	regulation of neurogenesis	biological_process	483/12078	630/18422	1.16936	5.0882e-10	1.4168e-07	483
GO:0051254	positive regulation of RNA metabolic process	biological_process	903/12078	1230/18422	1.11976	5.88707e-10	1.61514e-07	903
GO:0022603	regulation of anatomical structure morphogenesis	biological_process	629/12078	838/18422	1.14485	8.15097e-10	2.17235e-07	629
GO:1902680	positive regulation of RNA biosynthetic process	biological_process	843/12078	1145/18422	1.12296	9.04811e-10	2.34447e-07	843
GO:1903508	positive regulation of nucleic acid-templated transcription	biological_process	843/12078	1145/18422	1.12296	9.04811e-10	2.34447e-07	843
GO:0009887	animal organ morphogenesis	biological_process	585/12078	777/18422	1.14836	1.42318e-09	3.54011e-07	585
GO:0065007	biological regulation	biological_process	6968/12078	10340/18422	1.02785	1.99538e-09	4.83453e-07	6968
GO:0009790	embryo development	biological_process	610/12078	814/18422	1.143	2.3105e-09	5.4563e-07	610
GO:0048519	negative regulation of biological process	biological_process	2851/12078	4111/18422	1.05777	2.97493e-09	6.93754e-07	2851
GO:0006357	regulation of transcription by RNA polymerase II	biological_process	1084/12078	1499/18422	1.10298	3.26847e-09	7.52797e-07	1084
GO:0006355	regulation of transcription, DNA-templated	biological_process	2001/12078	2847/18422	1.07202	3.32147e-09	7.55676e-07	2001
GO:0051252	regulation of RNA metabolic process	biological_process	2141/12078	3055/18422	1.06892	3.61007e-09	8.11439e-07	2141
GO:0010720	positive regulation of cell development	biological_process	330/12078	421/18422	1.19557	4.35037e-09	9.66195e-07	330
GO:0050789	regulation of biological process	biological_process	6553/12078	9712/18422	1.02914	4.59867e-09	9.9759e-07	6553
GO:1903506	regulation of nucleic acid-templated transcription	biological_process	2003/12078	2852/18422	1.07121	4.74769e-09	1.01808e-06	2003
GO:0035295	tube development	biological_process	536/12078	711/18422	1.14984	5.10508e-09	1.08228e-06	536
GO:2001141	regulation of RNA biosynthetic process	biological_process	2004/12078	2854/18422	1.07099	5.19615e-09	1.08848e-06	2004
GO:0010604	positive regulation of macromolecule metabolic process	biological_process	1736/12078	2458/18422	1.07723	5.54978e-09	1.1254e-06	1736
GO:0032989	cellular component morphogenesis	biological_process	489/12078	645/18422	1.15635	6.44807e-09	1.2935e-06	489
GO:0000904	cell morphogenesis involved in differentiation	biological_process	353/12078	454/18422	1.18593	6.95902e-09	1.38114e-06	353
GO:0051094	positive regulation of developmental process	biological_process	754/12078	1024/18422	1.12309	7.12544e-09	1.39929e-06	754
GO:0019222	regulation of metabolic process	biological_process	3605/12078	5249/18422	1.04754	9.10237e-09	1.73279e-06	3605
GO:0043062	extracellular structure organization	biological_process	201/12078	246/18422	1.24624	1.30192e-08	2.40482e-06	201
GO:0051056	regulation of small GTPase mediated signal transduction	biological_process	216/12078	267/18422	1.23391	1.95449e-08	3.47267e-06	216
GO:0048646	anatomical structure formation involved in morphogenesis	biological_process	552/12078	738/18422	1.14084	2.16393e-08	3.80851e-06	552
GO:0010628	positive regulation of gene expression	biological_process	1053/12078	1462/18422	1.09856	2.22838e-08	3.88529e-06	1053
GO:0060255	regulation of macromolecule metabolic process	biological_process	3350/12078	4873/18422	1.04855	2.35167e-08	4.0623e-06	3350
GO:0051241	negative regulation of multicellular organismal process	biological_process	625/12078	843/18422	1.13082	2.60236e-08	4.41361e-06	625
GO:0048585	negative regulation of response to stimulus	biological_process	884/12078	1217/18422	1.10791	2.75163e-08	4.62472e-06	884
GO:0051049	regulation of transport	biological_process	971/12078	1344/18422	1.10195	3.1456e-08	5.23967e-06	971
GO:0048468	cell development	biological_process	986/12078	1366/18422	1.10095	3.26585e-08	5.34767e-06	986
GO:0051172	negative regulation of nitrogen compound metabolic process	biological_process	1222/12078	1711/18422	1.08934	3.38068e-08	5.48435e-06	1222
GO:0030001	metal ion transport	biological_process	391/12078	511/18422	1.16707	3.43767e-08	5.52872e-06	391
GO:0006351	transcription, DNA-templated	biological_process	1415/12078	1995/18422	1.08182	3.77796e-08	5.97301e-06	1415
GO:0097659	nucleic acid-templated transcription	biological_process	1415/12078	1995/18422	1.08182	3.77796e-08	5.97301e-06	1415
GO:0098657	import into cell	biological_process	300/12078	384/18422	1.1916	4.00464e-08	6.2782e-06	300
GO:0031399	regulation of protein modification process	biological_process	984/12078	1364/18422	1.10033	4.04293e-08	6.2854e-06	984
GO:0001501	skeletal system development	biological_process	310/12078	398/18422	1.18801	4.16543e-08	6.42233e-06	310
GO:0072359	circulatory system development	biological_process	533/12078	713/18422	1.1402	4.33394e-08	6.62738e-06	533
GO:2000112	regulation of cellular macromolecule biosynthetic process	biological_process	2229/12078	3202/18422	1.06177	5.00473e-08	7.41017e-06	2229
GO:0031326	regulation of cellular biosynthetic process	biological_process	2318/12078	3335/18422	1.06013	5.37369e-08	7.83215e-06	2318
GO:0006928	movement of cell or subcellular component	biological_process	849/12078	1169/18422	1.10773	5.5245e-08	7.98954e-06	849
GO:0051173	positive regulation of nitrogen compound metabolic process	biological_process	1624/12078	2306/18422	1.07416	6.32984e-08	8.81265e-06	1624
GO:0045944	positive regulation of transcription by RNA polymerase II	biological_process	606/12078	819/18422	1.12858	6.96499e-08	9.55432e-06	606
GO:0010648	negative regulation of cell communication	biological_process	775/12078	1063/18422	1.11201	7.60612e-08	1.03576e-05	775
GO:0031344	regulation of cell projection organization	biological_process	403/12078	530/18422	1.15977	7.7216e-08	1.04387e-05	403
GO:0031328	positive regulation of cellular biosynthetic process	biological_process	986/12078	1370/18422	1.09774	8.214e-08	1.09457e-05	986
GO:0008150	biological_process	biological_process	10547/12078	15908/18422	1.01124	8.3674e-08	1.10467e-05	10547
GO:0010556	regulation of macromolecule biosynthetic process	biological_process	2267/12078	3262/18422	1.06001	8.40819e-08	1.10467e-05	2267
GO:0009891	positive regulation of biosynthetic process	biological_process	1004/12078	1397/18422	1.09617	9.68931e-08	1.2553e-05	1004
GO:0032774	RNA biosynthetic process	biological_process	1417/12078	2003/18422	1.07902	9.86016e-08	1.26863e-05	1417
GO:0045664	regulation of neuron differentiation	biological_process	394/12078	518/18422	1.16013	1.01266e-07	1.29398e-05	394
GO:0065008	regulation of biological quality	biological_process	2164/12078	3110/18422	1.0613	1.03398e-07	1.31224e-05	2164
GO:0051270	regulation of cellular component movement	biological_process	537/12078	722/18422	1.13443	1.24349e-07	1.55695e-05	537
GO:0009889	regulation of biosynthetic process	biological_process	2349/12078	3387/18422	1.05781	1.26691e-07	1.5757e-05	2349
GO:0120035	regulation of plasma membrane bounded cell projection organization	biological_process	397/12078	523/18422	1.15779	1.34916e-07	1.66689e-05	397
GO:0051240	positive regulation of multicellular organismal process	biological_process	865/12078	1196/18422	1.10313	1.38174e-07	1.69591e-05	865
GO:0030855	epithelial cell differentiation	biological_process	330/12078	429/18422	1.17327	1.57408e-07	1.91935e-05	330
GO:0006811	ion transport	biological_process	759/12078	1043/18422	1.10994	1.71821e-07	2.08149e-05	759
GO:0019219	regulation of nucleobase-containing compound metabolic process	biological_process	2259/12078	3255/18422	1.05854	1.74246e-07	2.09725e-05	2259
GO:0006897	endocytosis	biological_process	235/12078	297/18422	1.20685	1.7807e-07	2.12954e-05	235
GO:0030198	extracellular matrix organization	biological_process	178/12078	219/18422	1.2397	1.81438e-07	2.15599e-05	178
GO:0023057	negative regulation of signaling	biological_process	774/12078	1065/18422	1.10849	1.83291e-07	2.16423e-05	774
GO:0045597	positive regulation of cell differentiation	biological_process	557/12078	752/18422	1.12974	1.88169e-07	2.20785e-05	557
GO:0009968	negative regulation of signal transduction	biological_process	718/12078	985/18422	1.11181	2.4475e-07	2.83606e-05	718
GO:0031324	negative regulation of cellular metabolic process	biological_process	1334/12078	1886/18422	1.07884	2.62945e-07	2.95512e-05	1334
GO:0051962	positive regulation of nervous system development	biological_process	307/12078	398/18422	1.17651	2.6587e-07	2.9701e-05	307
GO:0023052	signaling	biological_process	2944/12078	4283/18422	1.04841	2.90069e-07	3.22115e-05	2944
GO:0030334	regulation of cell migration	biological_process	457/12078	611/18422	1.14082	3.579e-07	3.89836e-05	457
GO:0040012	regulation of locomotion	biological_process	529/12078	714/18422	1.13005	3.60888e-07	3.89836e-05	529
GO:0050769	positive regulation of neurogenesis	biological_process	270/12078	347/18422	1.1868	3.61501e-07	3.89836e-05	270
GO:0006468	protein phosphorylation	biological_process	503/12078	677/18422	1.13324	3.89967e-07	4.15727e-05	503
GO:0051130	positive regulation of cellular component organization	biological_process	715/12078	983/18422	1.10942	4.45485e-07	4.72214e-05	715
GO:0007010	cytoskeleton organization	biological_process	674/12078	924/18422	1.11258	4.89565e-07	5.13108e-05	674
GO:0051234	establishment of localization	biological_process	2414/12078	3494/18422	1.05379	5.15854e-07	5.34654e-05	2414
GO:1902531	regulation of intracellular signal transduction	biological_process	1019/12078	1427/18422	1.08916	5.47805e-07	5.64633e-05	1019
GO:0051246	regulation of protein metabolic process	biological_process	1436/12078	2041/18422	1.07313	5.90124e-07	6.0491e-05	1436
GO:0022604	regulation of cell morphogenesis	biological_process	336/12078	441/18422	1.1621	6.55947e-07	6.67912e-05	336
GO:0010557	positive regulation of macromolecule biosynthetic process	biological_process	960/12078	1342/18422	1.09109	7.28144e-07	7.30337e-05	960
GO:0048812	neuron projection morphogenesis	biological_process	315/12078	412/18422	1.16615	8.28941e-07	8.2699e-05	315
GO:0006810	transport	biological_process	2340/12078	3387/18422	1.05376	8.3548e-07	8.2908e-05	2340
GO:0120039	plasma membrane bounded cell projection morphogenesis	biological_process	317/12078	415/18422	1.16507	8.91275e-07	8.79769e-05	317
GO:0030155	regulation of cell adhesion	biological_process	400/12078	533/18422	1.14465	1.04645e-06	0.000101709	400
GO:0006812	cation transport	biological_process	484/12078	653/18422	1.13051	1.04675e-06	0.000101709	484
GO:0007154	cell communication	biological_process	3006/12078	4387/18422	1.04511	1.13483e-06	0.000109697	3006
GO:0010605	negative regulation of macromolecule metabolic process	biological_process	1365/12078	1940/18422	1.07318	1.15191e-06	0.000110773	1365
GO:0048858	cell projection morphogenesis	biological_process	320/12078	420/18422	1.1621	1.20377e-06	0.000114579	320
GO:0030182	neuron differentiation	biological_process	654/12078	899/18422	1.10958	1.34859e-06	0.000127712	654
GO:0035239	tube morphogenesis	biological_process	425/12078	570/18422	1.13725	1.63457e-06	0.000154012	425
GO:0007417	central nervous system development	biological_process	553/12078	754/18422	1.11865	1.75222e-06	0.000163963	553
GO:0040011	locomotion	biological_process	696/12078	961/18422	1.10466	1.75775e-06	0.000163963	696
GO:0007267	cell-cell signaling	biological_process	617/12078	847/18422	1.11108	2.01604e-06	0.000187121	617
GO:0050808	synapse organization	biological_process	136/12078	166/18422	1.2496	2.14102e-06	0.000197184	136
GO:0050896	response to stimulus	biological_process	4589/12078	6781/18422	1.03221	2.1456e-06	0.000197184	4589
GO:0010468	regulation of gene expression	biological_process	2519/12078	3663/18422	1.0489	2.45762e-06	0.000224734	2519
GO:0007507	heart development	biological_process	313/12078	412/18422	1.15875	2.46947e-06	0.000224734	313
GO:0046777	protein autophosphorylation	biological_process	160/12078	199/18422	1.22633	2.72285e-06	0.00024659	160
GO:0010975	regulation of neuron projection development	biological_process	297/12078	390/18422	1.16154	3.09636e-06	0.000275075	297
GO:0043588	skin development	biological_process	140/12078	172/18422	1.24148	3.12324e-06	0.000276147	140
GO:0001932	regulation of protein phosphorylation	biological_process	780/12078	1086/18422	1.09549	3.27651e-06	0.000288333	780
GO:0009792	embryo development ending in birth or egg hatching	biological_process	382/12078	511/18422	1.14021	3.53199e-06	0.000302397	382
GO:0032268	regulation of cellular protein metabolic process	biological_process	1326/12078	1889/18422	1.07066	3.53358e-06	0.000302397	1326
GO:0071417	cellular response to organonitrogen compound	biological_process	279/12078	365/18422	1.16588	3.58233e-06	0.000303782	279
GO:0043009	chordate embryonic development	biological_process	379/12078	507/18422	1.14018	3.8701e-06	0.000323769	379
GO:1901699	cellular response to nitrogen compound	biological_process	312/12078	412/18422	1.15505	4.1794e-06	0.000348084	312
GO:0016043	cellular component organization	biological_process	3214/12078	4712/18422	1.04036	4.69193e-06	0.000389034	3214
GO:0032990	cell part morphogenesis	biological_process	330/12078	438/18422	1.14916	4.96513e-06	0.000409865	330
GO:2000145	regulation of cell motility	biological_process	483/12078	657/18422	1.1213	5.11449e-06	0.000420335	483
GO:0009892	negative regulation of metabolic process	biological_process	1483/12078	2124/18422	1.06495	5.28312e-06	0.000432289	1483
GO:0045935	positive regulation of nucleobase-containing compound metabolic process	biological_process	977/12078	1377/18422	1.08219	5.46799e-06	0.000445462	977
GO:0042493	response to drug	biological_process	455/12078	617/18422	1.12478	5.53897e-06	0.000449283	455
GO:0016192	vesicle-mediated transport	biological_process	861/12078	1207/18422	1.08802	5.64881e-06	0.000455505	861
GO:0010769	regulation of cell morphogenesis involved in differentiation	biological_process	214/12078	275/18422	1.18692	5.66452e-06	0.000455505	214
GO:0051174	regulation of phosphorus metabolic process	biological_process	942/12078	1326/18422	1.08355	5.90408e-06	0.000472732	942
GO:0006464	cellular protein modification process	biological_process	1615/12078	2321/18422	1.0613	6.18801e-06	0.000489759	1615
GO:0036211	protein modification process	biological_process	1615/12078	2321/18422	1.0613	6.18801e-06	0.000489759	1615
GO:0019220	regulation of phosphate metabolic process	biological_process	941/12078	1325/18422	1.08322	6.46047e-06	0.000508551	941
GO:0071310	cellular response to organic substance	biological_process	1100/12078	1561/18422	1.07481	9.32891e-06	0.000725167	1100
GO:1901362	organic cyclic compound biosynthetic process	biological_process	1777/12078	2565/18422	1.05668	9.44593e-06	0.000731217	1777
GO:1901698	response to nitrogen compound	biological_process	515/12078	706/18422	1.11261	1.09541e-05	0.000840983	515
GO:0010033	response to organic substance	biological_process	1415/12078	2028/18422	1.06422	1.10833e-05	0.000844644	1415
GO:0030029	actin filament-based process	biological_process	348/12078	466/18422	1.13903	1.10923e-05	0.000844644	348
GO:0048638	regulation of developmental growth	biological_process	200/12078	257/18422	1.18697	1.12837e-05	0.000855727	200
GO:0072358	cardiovascular system development	biological_process	343/12078	459/18422	1.13979	1.15857e-05	0.000875069	343
GO:0043412	macromolecule modification	biological_process	1792/12078	2589/18422	1.05572	1.18283e-05	0.000889791	1792
GO:0042325	regulation of phosphorylation	biological_process	857/12078	1205/18422	1.08476	1.21757e-05	0.000912246	857
GO:0071407	cellular response to organic cyclic compound	biological_process	254/12078	333/18422	1.16341	1.27306e-05	0.00095001	254
GO:0048667	cell morphogenesis involved in neuron differentiation	biological_process	283/12078	374/18422	1.15413	1.28258e-05	0.000953297	283
GO:0048666	neuron development	biological_process	527/12078	724/18422	1.11023	1.28992e-05	0.000954948	527
GO:0050770	regulation of axonogenesis	biological_process	125/12078	154/18422	1.23803	1.36267e-05	0.00100482	125
GO:1901701	cellular response to oxygen-containing compound	biological_process	504/12078	691/18422	1.11249	1.38544e-05	0.0010136	504
GO:0007610	behavior	biological_process	344/12078	461/18422	1.13815	1.39575e-05	0.00101715	344
GO:0060560	developmental growth involved in morphogenesis	biological_process	87/12078	103/18422	1.28832	1.41136e-05	0.00102453	87
GO:0018130	heterocycle biosynthetic process	biological_process	1699/12078	2452/18422	1.05685	1.45829e-05	0.00105081	1699
GO:0031400	negative regulation of protein modification process	biological_process	339/12078	454/18422	1.1389	1.45883e-05	0.00105081	339
GO:0010506	regulation of autophagy	biological_process	165/12078	209/18422	1.20415	1.48866e-05	0.00106817	165
GO:0048732	gland development	biological_process	211/12078	273/18422	1.17886	1.50084e-05	0.00107278	211
GO:0007389	pattern specification process	biological_process	288/12078	382/18422	1.14993	1.77961e-05	0.00126719	288
GO:0043549	regulation of kinase activity	biological_process	443/12078	604/18422	1.11869	1.84433e-05	0.00130828	443
GO:0007409	axonogenesis	biological_process	237/12078	310/18422	1.16608	1.85148e-05	0.00130838	237
GO:0001655	urogenital system development	biological_process	192/12078	247/18422	1.18562	1.90621e-05	0.00134197	192
GO:0031175	neuron projection development	biological_process	429/12078	584/18422	1.12043	1.93408e-05	0.00135647	429
GO:0031589	cell-substrate adhesion	biological_process	115/12078	141/18422	1.244	1.94786e-05	0.00136102	115
GO:0010243	response to organonitrogen compound	biological_process	465/12078	636/18422	1.11516	1.97771e-05	0.00137672	465
GO:0046578	regulation of Ras protein signal transduction	biological_process	153/12078	193/18422	1.20914	1.98917e-05	0.00137955	153
GO:0007165	signal transduction	biological_process	2703/12078	3957/18422	1.04189	2.03916e-05	0.00140899	2703
GO:0001708	cell fate specification	biological_process	56/12078	63/18422	1.35578	2.15655e-05	0.0014846	56
GO:0010558	negative regulation of macromolecule biosynthetic process	biological_process	812/12078	1142/18422	1.08451	2.1861e-05	0.0014964	812
GO:0019438	aromatic compound biosynthetic process	biological_process	1699/12078	2455/18422	1.05556	2.18973e-05	0.0014964	1699
GO:1901700	response to oxygen-containing compound	biological_process	730/12078	1022/18422	1.08947	2.24264e-05	0.0015214	730
GO:0031331	positive regulation of cellular catabolic process	biological_process	201/12078	260/18422	1.17914	2.30698e-05	0.00154935	201
GO:0051248	negative regulation of protein metabolic process	biological_process	544/12078	751/18422	1.10484	2.30875e-05	0.00154935	544
GO:2000113	negative regulation of cellular macromolecule biosynthetic process	biological_process	794/12078	1116/18422	1.08517	2.36242e-05	0.00157969	794
GO:0001944	vasculature development	biological_process	335/12078	450/18422	1.13547	2.5263e-05	0.00167835	335
GO:0060348	bone development	biological_process	122/12078	151/18422	1.23232	2.63408e-05	0.0017426	122
GO:0071495	cellular response to endogenous stimulus	biological_process	600/12078	833/18422	1.09862	2.64442e-05	0.00174326	600
GO:0016477	cell migration	biological_process	480/12078	659/18422	1.11096	2.78652e-05	0.00183047	480
GO:0120036	plasma membrane bounded cell projection organization	biological_process	706/12078	988/18422	1.08991	2.81685e-05	0.0018439	706
GO:0032269	negative regulation of cellular protein metabolic process	biological_process	511/12078	704/18422	1.10711	2.8557e-05	0.0018628	511
GO:0048663	neuron fate commitment	biological_process	55/12078	62/18422	1.35305	2.9416e-05	0.00191214	55
GO:0031327	negative regulation of cellular biosynthetic process	biological_process	838/12078	1182/18422	1.08136	3.10033e-05	0.00200833	838
GO:0045446	endothelial cell differentiation	biological_process	65/12078	75/18422	1.32189	3.15583e-05	0.00202882	65
GO:0031346	positive regulation of cell projection organization	biological_process	219/12078	286/18422	1.16794	3.15587e-05	0.00202882	219
GO:0030036	actin cytoskeleton organization	biological_process	310/12078	415/18422	1.13935	3.16459e-05	0.00202882	310
GO:0007420	brain development	biological_process	418/12078	570/18422	1.11852	3.22282e-05	0.00205908	418
GO:0034654	nucleobase-containing compound biosynthetic process	biological_process	1651/12078	2387/18422	1.05496	3.49978e-05	0.0022113	1651
GO:0032386	regulation of intracellular transport	biological_process	206/12078	268/18422	1.1724	3.52034e-05	0.0022113	206
GO:0048729	tissue morphogenesis	biological_process	337/12078	454/18422	1.13218	3.60467e-05	0.00224163	337
GO:0090066	regulation of anatomical structure size	biological_process	316/12078	424/18422	1.13674	3.6416e-05	0.00225706	316
GO:0032963	collagen metabolic process	biological_process	47/12078	52/18422	1.37859	3.67432e-05	0.00226232	47
GO:0061564	axon development	biological_process	252/12078	333/18422	1.15425	3.7048e-05	0.00227358	252
GO:0034220	ion transmembrane transport	biological_process	375/12078	509/18422	1.12371	4.1538e-05	0.00251601	375
GO:0030030	cell projection organization	biological_process	723/12078	1015/18422	1.08646	4.31996e-05	0.00260819	723
GO:0001568	blood vessel development	biological_process	317/12078	426/18422	1.13499	4.36534e-05	0.00262709	317
GO:0072511	divalent inorganic cation transport	biological_process	167/12078	214/18422	1.19027	4.41404e-05	0.00264785	167
GO:0016310	phosphorylation	biological_process	590/12078	821/18422	1.0961	4.69362e-05	0.00275359	590
GO:0033043	regulation of organelle organization	biological_process	799/12078	1127/18422	1.08135	4.75951e-05	0.00278349	799
GO:0070838	divalent metal ion transport	biological_process	164/12078	210/18422	1.19115	4.7878e-05	0.00279129	164
GO:0048870	cell motility	biological_process	539/12078	747/18422	1.10055	4.98494e-05	0.00287923	539
GO:0051674	localization of cell	biological_process	539/12078	747/18422	1.10055	4.98494e-05	0.00287923	539
GO:0048598	embryonic morphogenesis	biological_process	377/12078	513/18422	1.1209	5.70888e-05	0.00325703	377
GO:0008544	epidermis development	biological_process	155/12078	198/18422	1.19401	6.09584e-05	0.0034672	155
GO:0060322	head development	biological_process	437/12078	600/18422	1.11089	6.34098e-05	0.00358477	437
GO:0009719	response to endogenous stimulus	biological_process	708/12078	995/18422	1.08531	6.38353e-05	0.00359792	708
GO:0099536	synaptic signaling	biological_process	262/12078	349/18422	1.14503	7.01615e-05	0.00393073	262
GO:0051093	negative regulation of developmental process	biological_process	540/12078	750/18422	1.09818	7.08879e-05	0.00395953	540
GO:0009894	regulation of catabolic process	biological_process	489/12078	676/18422	1.10333	7.37489e-05	0.00410705	489
GO:0065009	regulation of molecular function	biological_process	1361/12078	1961/18422	1.05858	7.51326e-05	0.00417165	1361
GO:0045666	positive regulation of neuron differentiation	biological_process	211/12078	277/18422	1.16183	7.74214e-05	0.00426069	211
GO:0045892	negative regulation of transcription, DNA-templated	biological_process	680/12078	955/18422	1.08604	7.82238e-05	0.0042796	680
GO:0002064	epithelial cell development	biological_process	138/12078	175/18422	1.20277	8.04166e-05	0.0043867	138
GO:0009890	negative regulation of biosynthetic process	biological_process	845/12078	1198/18422	1.07583	8.69558e-05	0.00470216	845
GO:0099537	trans-synaptic signaling	biological_process	255/12078	340/18422	1.14394	9.73184e-05	0.00520727	255
GO:0034329	cell junction assembly	biological_process	91/12078	111/18422	1.25043	9.7413e-05	0.00520727	91
GO:0018209	peptidyl-serine modification	biological_process	142/12078	181/18422	1.19661	0.000101029	0.00538516	142
GO:0045995	regulation of embryonic development	biological_process	110/12078	137/18422	1.22466	0.000107119	0.00569349	110
GO:0043410	positive regulation of MAPK cascade	biological_process	273/12078	366/18422	1.13769	0.000108875	0.00575964	273
GO:0009581	detection of external stimulus	biological_process	76/12078	91/18422	1.27384	0.000108981	0.00575964	76
GO:0001885	endothelial cell development	biological_process	47/12078	53/18422	1.35258	0.000117357	0.00616738	47
GO:0009896	positive regulation of catabolic process	biological_process	232/12078	308/18422	1.14889	0.000123916	0.00649376	232
GO:1902679	negative regulation of RNA biosynthetic process	biological_process	683/12078	962/18422	1.0829	0.000129483	0.0067101	683
GO:1903507	negative regulation of nucleic acid-templated transcription	biological_process	683/12078	962/18422	1.0829	0.000129483	0.0067101	683
GO:0031329	regulation of cellular catabolic process	biological_process	406/12078	558/18422	1.10977	0.000131351	0.00678805	406
GO:0003158	endothelium development	biological_process	72/12078	86/18422	1.27696	0.000140826	0.00723761	72
GO:0007268	chemical synaptic transmission	biological_process	250/12078	334/18422	1.14166	0.000141883	0.00725197	250
GO:0098916	anterograde trans-synaptic signaling	biological_process	250/12078	334/18422	1.14166	0.000141883	0.00725197	250
GO:0032480	negative regulation of type I interferon production	biological_process	31/12078	33/18422	1.43281	0.000144578	0.00736954	31
GO:0032535	regulation of cellular component size	biological_process	252/12078	337/18422	1.14054	0.000149094	0.00757899	252
GO:0045934	negative regulation of nucleobase-containing compound metabolic process	biological_process	781/12078	1107/18422	1.07608	0.000153597	0.00778669	781
GO:0051247	positive regulation of protein metabolic process	biological_process	844/12078	1200/18422	1.07276	0.000157617	0.00796882	844
GO:0032270	positive regulation of cellular protein metabolic process	biological_process	789/12078	1119/18422	1.07545	0.000159549	0.00802303	789
GO:0055085	transmembrane transport	biological_process	499/12078	694/18422	1.09669	0.000162898	0.00815768	499
GO:0071840	cellular component organization or biogenesis	biological_process	3343/12078	4942/18422	1.03175	0.000163101	0.00815768	3343
GO:0008361	regulation of cell size	biological_process	116/12078	146/18422	1.21184	0.00016354	0.00815774	116
GO:0018105	peptidyl-serine phosphorylation	biological_process	129/12078	164/18422	1.19974	0.00016714	0.00828876	129
GO:0006816	calcium ion transport	biological_process	139/12078	178/18422	1.19107	0.000176893	0.00870743	139
GO:0045834	positive regulation of lipid metabolic process	biological_process	71/12078	85/18422	1.27403	0.000181325	0.00885548	71
GO:0007167	enzyme linked receptor protein signaling pathway	biological_process	385/12078	529/18422	1.11006	0.00018715	0.00909236	385
GO:0032880	regulation of protein localization	biological_process	532/12078	743/18422	1.09211	0.000196258	0.00948822	532
GO:0072001	renal system development	biological_process	171/12078	223/18422	1.16959	0.000196315	0.00948822	171
GO:0048562	embryonic organ morphogenesis	biological_process	205/12078	271/18422	1.15379	0.000197244	0.0095085	205
GO:0001822	kidney development	biological_process	161/12078	209/18422	1.17496	0.000199577	0.0095695	161
GO:0045165	cell fate commitment	biological_process	156/12078	202/18422	1.17792	0.000200049	0.0095695	156
GO:0060976	coronary vasculature development	biological_process	38/12078	42/18422	1.37999	0.00020552	0.00978107	38
GO:0048878	chemical homeostasis	biological_process	607/12078	853/18422	1.08538	0.000207628	0.00985628	607
GO:0007611	learning or memory	biological_process	148/12078	191/18422	1.18187	0.00021748	0.0102717	148
GO:0060341	regulation of cellular localization	biological_process	461/12078	640/18422	1.09866	0.000220036	0.0103662	461
GO:0009582	detection of abiotic stimulus	biological_process	76/12078	92/18422	1.25999	0.00022436	0.0105129	76
GO:0098655	cation transmembrane transport	biological_process	256/12078	344/18422	1.13507	0.000226315	0.0105448	256
GO:1902106	negative regulation of leukocyte differentiation	biological_process	61/12078	72/18422	1.29223	0.00023045	0.0106947	61
GO:0000122	negative regulation of transcription by RNA polymerase II	biological_process	438/12078	607/18422	1.10059	0.00024458	0.0112386	438
GO:0007423	sensory organ development	biological_process	342/12078	468/18422	1.11461	0.000253291	0.0115819	342
GO:0010470	regulation of gastrulation	biological_process	51/12078	59/18422	1.31844	0.000266204	0.0121425	51
GO:0032388	positive regulation of intracellular transport	biological_process	139/12078	179/18422	1.18441	0.000280855	0.0127796	139
GO:0007163	establishment or maintenance of cell polarity	biological_process	121/12078	154/18422	1.19841	0.000286603	0.0130094	121
GO:0010629	negative regulation of gene expression	biological_process	959/12078	1374/18422	1.06457	0.000297694	0.0134801	959
GO:0034333	adherens junction assembly	biological_process	29/12078	31/18422	1.42685	0.000298985	0.0135057	29
GO:0051050	positive regulation of transport	biological_process	510/12078	713/18422	1.09099	0.000307447	0.013821	510
GO:0048568	embryonic organ development	biological_process	279/12078	378/18422	1.12578	0.000311006	0.0139474	279
GO:0051253	negative regulation of RNA metabolic process	biological_process	730/12078	1036/18422	1.07474	0.000313787	0.0140384	730
GO:0006366	transcription by RNA polymerase II	biological_process	258/12078	348/18422	1.13079	0.000322594	0.0143979	258
GO:0070887	cellular response to chemical stimulus	biological_process	1322/12078	1914/18422	1.05349	0.000325568	0.0144801	1322
GO:0006796	phosphate-containing compound metabolic process	biological_process	1084/12078	1560/18422	1.05985	0.000325989	0.0144801	1084
GO:0040017	positive regulation of locomotion	biological_process	290/12078	394/18422	1.12265	0.000328641	0.0145632	290
GO:0043405	regulation of MAP kinase activity	biological_process	180/12078	237/18422	1.15842	0.000329502	0.0145668	180
GO:0008285	negative regulation of cell population proliferation	biological_process	371/12078	511/18422	1.10738	0.000331233	0.0146087	371
GO:1902105	regulation of leukocyte differentiation	biological_process	153/12078	199/18422	1.17268	0.000334553	0.0147203	153
GO:0031401	positive regulation of protein modification process	biological_process	614/12078	866/18422	1.08141	0.000350269	0.0153036	614
GO:0051961	negative regulation of nervous system development	biological_process	182/12078	240/18422	1.15665	0.000351565	0.0153243	182
GO:0003007	heart morphogenesis	biological_process	155/12078	202/18422	1.17037	0.00036221	0.0157149	155
GO:0014037	Schwann cell differentiation	biological_process	24/12078	25/18422	1.46424	0.000366204	0.0158146	24
GO:0003002	regionalization	biological_process	215/12078	287/18422	1.14261	0.00037063	0.015932	215
GO:0044057	regulation of system process	biological_process	273/12078	370/18422	1.12539	0.000372694	0.0159839	273
GO:0042592	homeostatic process	biological_process	885/12078	1266/18422	1.06623	0.000376607	0.0161146	885
GO:0045859	regulation of protein kinase activity	biological_process	394/12078	545/18422	1.10266	0.000385742	0.0163927	394
GO:0051716	cellular response to stimulus	biological_process	3587/12078	5321/18422	1.02821	0.000393497	0.0166843	3587
GO:0045665	negative regulation of neuron differentiation	biological_process	142/12078	184/18422	1.1771	0.000401029	0.0169651	142
GO:0070201	regulation of establishment of protein localization	biological_process	398/12078	551/18422	1.10173	0.000403241	0.0170201	398
GO:0010770	positive regulation of cell morphogenesis involved in differentiation	biological_process	114/12078	145/18422	1.19916	0.000406316	0.0171111	114
GO:0001704	formation of primary germ layer	biological_process	79/12078	97/18422	1.24222	0.000420765	0.01764	79
GO:0045785	positive regulation of cell adhesion	biological_process	242/12078	326/18422	1.13224	0.000427525	0.0178475	242
GO:0022407	regulation of cell-cell adhesion	biological_process	228/12078	306/18422	1.13646	0.000430498	0.0178475	228
GO:0030900	forebrain development	biological_process	228/12078	306/18422	1.13646	0.000430498	0.0178475	228
GO:0090087	regulation of peptide transport	biological_process	386/12078	534/18422	1.10252	0.00044674	0.0184798	386
GO:0007169	transmembrane receptor protein tyrosine kinase signaling pathway	biological_process	276/12078	375/18422	1.12259	0.000454731	0.0187687	276
GO:0048705	skeletal system morphogenesis	biological_process	146/12078	190/18422	1.17204	0.000473279	0.0194911	146
GO:0021953	central nervous system neuron differentiation	biological_process	131/12078	169/18422	1.1823	0.000476242	0.01957	131
GO:0010976	positive regulation of neuron projection development	biological_process	158/12078	207/18422	1.1642	0.000496083	0.0203405	158
GO:0048588	developmental cell growth	biological_process	61/12078	73/18422	1.27453	0.000504959	0.0206138	61
GO:0030335	positive regulation of cell migration	biological_process	259/12078	351/18422	1.12547	0.000515765	0.0209632	259
GO:0035023	regulation of Rho protein signal transduction	biological_process	97/12078	122/18422	1.2127	0.000523983	0.0212509	97
GO:0030574	collagen catabolic process	biological_process	35/12078	39/18422	1.36882	0.000546737	0.0220301	35
GO:0007162	negative regulation of cell adhesion	biological_process	162/12078	213/18422	1.16005	0.000570025	0.0228206	162
GO:0019216	regulation of lipid metabolic process	biological_process	193/12078	257/18422	1.14542	0.000580703	0.0231487	193
GO:0035690	cellular response to drug	biological_process	193/12078	257/18422	1.14542	0.000580703	0.0231487	193
GO:0051338	regulation of transferase activity	biological_process	503/12078	706/18422	1.08669	0.000595341	0.0236312	503
GO:0014070	response to organic cyclic compound	biological_process	403/12078	560/18422	1.09764	0.000599465	0.0236941	403
GO:0051223	regulation of protein transport	biological_process	372/12078	515/18422	1.10174	0.000612657	0.0241502	372
GO:0098609	cell-cell adhesion	biological_process	262/12078	356/18422	1.12252	0.000629497	0.024724	262
GO:0000165	MAPK cascade	biological_process	173/12078	229/18422	1.15227	0.000670245	0.0261046	173
GO:0098662	inorganic cation transmembrane transport	biological_process	236/12078	319/18422	1.1284	0.000696863	0.0270078	236
GO:0002009	morphogenesis of an epithelium	biological_process	268/12078	365/18422	1.11991	0.000697778	0.0270078	268
GO:0010508	positive regulation of autophagy	biological_process	71/12078	87/18422	1.24475	0.000728662	0.0280287	71
GO:0031098	stress-activated protein kinase signaling cascade	biological_process	90/12078	113/18422	1.2148	0.000740611	0.0284297	90
GO:0050878	regulation of body fluid levels	biological_process	240/12078	325/18422	1.12634	0.000753115	0.0288503	240
GO:1905114	cell surface receptor signaling pathway involved in cell-cell signaling	biological_process	233/12078	315/18422	1.1282	0.000763449	0.0291863	233
GO:0045601	regulation of endothelial cell differentiation	biological_process	22/12078	23/18422	1.45894	0.000789532	0.029999	22
GO:0010810	regulation of cell-substrate adhesion	biological_process	138/12078	180/18422	1.16936	0.000792532	0.0300101	138
GO:0090316	positive regulation of intracellular protein transport	biological_process	113/12078	145/18422	1.18865	0.000794206	0.0300101	113
GO:0042327	positive regulation of phosphorylation	biological_process	532/12078	750/18422	1.08191	0.00079465	0.0300101	532
GO:0097485	neuron projection guidance	biological_process	155/12078	204/18422	1.15889	0.000802284	0.0302372	155
GO:0060562	epithelial tube morphogenesis	biological_process	200/12078	268/18422	1.13825	0.000819533	0.030825	200
GO:0042221	response to chemical	biological_process	2056/12078	3021/18422	1.03804	0.000822189	0.0308327	2056
GO:0050801	ion homeostasis	biological_process	439/12078	614/18422	1.09053	0.000826965	0.0309175	439
GO:0098660	inorganic ion transmembrane transport	biological_process	262/12078	357/18422	1.11937	0.000834871	0.0311507	262
GO:0048534	hematopoietic or lymphoid organ development	biological_process	347/12078	480/18422	1.10263	0.000836752	0.0311586	347
GO:0045197	establishment or maintenance of epithelial cell apical/basal polarity	biological_process	30/12078	33/18422	1.38659	0.000843287	0.0313394	30
GO:2000177	regulation of neural precursor cell proliferation	biological_process	53/12078	63/18422	1.28315	0.00084883	0.0314826	53
GO:0060537	muscle tissue development	biological_process	188/12078	251/18422	1.14242	0.000850914	0.0314973	188
GO:1901652	response to peptide	biological_process	195/12078	261/18422	1.13956	0.000856804	0.0316526	195
GO:0098771	inorganic ion homeostasis	biological_process	406/12078	566/18422	1.09409	0.000858912	0.0316677	406
GO:0002762	negative regulation of myeloid leukocyte differentiation	biological_process	37/12078	42/18422	1.34367	0.0008768	0.0322	37
GO:0061028	establishment of endothelial barrier	biological_process	37/12078	42/18422	1.34367	0.0008768	0.0322	37
GO:0044092	negative regulation of molecular function	biological_process	503/12078	708/18422	1.08362	0.00088082	0.032284	503
GO:0055065	metal ion homeostasis	biological_process	342/12078	473/18422	1.10283	0.000890507	0.0325751	342
GO:0043087	regulation of GTPase activity	biological_process	197/12078	264/18422	1.13816	0.000898892	0.0328175	197
GO:0050790	regulation of catalytic activity	biological_process	992/12078	1431/18422	1.05734	0.00093267	0.0339841	992
GO:0034330	cell junction organization	biological_process	127/12078	165/18422	1.17398	0.000957954	0.0348374	127
GO:0021915	neural tube development	biological_process	117/12078	151/18422	1.18182	0.000961055	0.0348822	117
GO:0006793	phosphorus metabolic process	biological_process	1092/12078	1580/18422	1.05416	0.000964512	0.0349397	1092
GO:1903725	regulation of phospholipid metabolic process	biological_process	40/12078	46/18422	1.32631	0.000970093	0.0350737	40
GO:0014706	striated muscle tissue development	biological_process	180/12078	240/18422	1.14394	0.000972691	0.0350997	180
GO:0001934	positive regulation of protein phosphorylation	biological_process	504/12078	710/18422	1.08271	0.000975532	0.0351342	504
GO:0007517	muscle organ development	biological_process	187/12078	250/18422	1.14089	0.00098171	0.0352207	187
GO:1903510	mucopolysaccharide metabolic process	biological_process	64/12078	78/18422	1.25149	0.00100055	0.0358276	64
GO:1902533	positive regulation of intracellular signal transduction	biological_process	510/12078	719/18422	1.08189	0.0010126	0.0361898	510
GO:0021510	spinal cord development	biological_process	75/12078	93/18422	1.23004	0.00102699	0.0366339	75
GO:1903829	positive regulation of cellular protein localization	biological_process	203/12078	273/18422	1.13416	0.00103108	0.0367095	203
GO:0021515	cell differentiation in spinal cord	biological_process	43/12078	50/18422	1.31172	0.00103564	0.0367765	43
GO:0006029	proteoglycan metabolic process	biological_process	61/12078	74/18422	1.2573	0.0010369	0.0367765	61
GO:0051046	regulation of secretion	biological_process	404/12078	564/18422	1.09256	0.0010466	0.0370499	404
GO:0033157	regulation of intracellular protein transport	biological_process	141/12078	185/18422	1.16249	0.00108202	0.0382315	141
GO:0007411	axon guidance	biological_process	153/12078	202/18422	1.15527	0.00109761	0.0387087	153
GO:0043086	negative regulation of catalytic activity	biological_process	340/12078	471/18422	1.10103	0.00110264	0.0388131	340
GO:0001818	negative regulation of cytokine production	biological_process	126/12078	164/18422	1.17184	0.00113622	0.0399196	126
GO:0050890	cognition	biological_process	167/12078	222/18422	1.14737	0.00115402	0.0403287	167
GO:0048514	blood vessel morphogenesis	biological_process	257/12078	351/18422	1.11678	0.00116467	0.0403866	257
GO:2001222	regulation of neuron migration	biological_process	29/12078	32/18422	1.38226	0.00117757	0.0407582	29
GO:0043550	regulation of lipid kinase activity	biological_process	36/12078	41/18422	1.33925	0.0011881	0.0409708	36
GO:0051272	positive regulation of cellular component movement	biological_process	277/12078	380/18422	1.11183	0.00120109	0.0413421	277
GO:0043406	positive regulation of MAP kinase activity	biological_process	133/12078	174/18422	1.16585	0.00120946	0.0414772	133
GO:0050768	negative regulation of neurogenesis	biological_process	169/12078	225/18422	1.14563	0.00121881	0.0416299	169
GO:0016055	Wnt signaling pathway	biological_process	211/12078	285/18422	1.12922	0.0012206	0.0416299	211
GO:0198738	cell-cell signaling by wnt	biological_process	211/12078	285/18422	1.12922	0.0012206	0.0416299	211
GO:1902275	regulation of chromatin organization	biological_process	103/12078	132/18422	1.19016	0.00123004	0.0418752	103
GO:0010721	negative regulation of cell development	biological_process	190/12078	255/18422	1.13646	0.00124322	0.0422468	190
GO:0035987	endodermal cell differentiation	biological_process	25/12078	27/18422	1.41227	0.00124842	0.0423464	25
GO:0040008	regulation of growth	biological_process	376/12078	524/18422	1.09446	0.001258	0.0425599	376
GO:0070588	calcium ion transmembrane transport	biological_process	90/12078	114/18422	1.20415	0.00125928	0.0425599	90
GO:0030516	regulation of axon extension	biological_process	63/12078	77/18422	1.24793	0.00126509	0.0426789	63
GO:0071805	potassium ion transmembrane transport	biological_process	82/12078	103/18422	1.21428	0.00128809	0.0433765	82
GO:0006820	anion transport	biological_process	283/12078	389/18422	1.10963	0.00130427	0.0438421	283
GO:0031345	negative regulation of cell projection organization	biological_process	110/12078	142/18422	1.18153	0.00136766	0.0458079	110
GO:0051048	negative regulation of secretion	biological_process	110/12078	142/18422	1.18153	0.00136766	0.0458079	110
GO:0060359	response to ammonium ion	biological_process	92/12078	117/18422	1.19934	0.00141503	0.0472252	92
GO:0001709	cell fate determination	biological_process	32/12078	36/18422	1.35578	0.0014218	0.047282	32
GO:0023014	signal transduction by protein phosphorylation	biological_process	189/12078	254/18422	1.13493	0.00142721	0.0473772	189
GO:0048736	appendage development	biological_process	122/12078	159/18422	1.17032	0.00147308	0.0485518	122
GO:0060173	limb development	biological_process	122/12078	159/18422	1.17032	0.00147308	0.0485518	122
GO:0006836	neurotransmitter transport	biological_process	117/12078	152/18422	1.17404	0.00148788	0.0488695	117
GO:0010638	positive regulation of organelle organization	biological_process	374/12078	522/18422	1.09281	0.00153442	0.0502214	374
GO:0043408	regulation of MAPK cascade	biological_process	400/12078	560/18422	1.08947	0.00154157	0.0503671	400
GO:2000147	positive regulation of cell motility	biological_process	268/12078	368/18422	1.11078	0.0015635	0.0509941	268
GO:0061387	regulation of extent of cell growth	biological_process	73/12078	91/18422	1.22355	0.00158291	0.0514473	73
GO:0032092	positive regulation of protein binding	biological_process	62/12078	76/18422	1.24428	0.00159553	0.0517673	62
GO:0035088	establishment or maintenance of apical/basal cell polarity	biological_process	35/12078	40/18422	1.3346	0.00160529	0.0518136	35
GO:0061245	establishment or maintenance of bipolar cell polarity	biological_process	35/12078	40/18422	1.3346	0.00160529	0.0518136	35
GO:1903146	regulation of autophagy of mitochondrion	biological_process	35/12078	40/18422	1.3346	0.00160529	0.0518136	35
GO:0048665	neuron fate specification	biological_process	28/12078	31/18422	1.37765	0.0016399	0.0527482	28
GO:0045910	negative regulation of DNA recombination	biological_process	20/12078	21/18422	1.45262	0.00169105	0.0541137	20
GO:0007160	cell-matrix adhesion	biological_process	78/12078	98/18422	1.21398	0.0017009	0.0543357	78
GO:0003205	cardiac chamber development	biological_process	106/12078	137/18422	1.18012	0.00178439	0.0567115	106
GO:0034332	adherens junction organization	biological_process	53/12078	64/18422	1.2631	0.00179029	0.0568022	53
GO:1903533	regulation of protein targeting	biological_process	75/12078	94/18422	1.21696	0.0018268	0.057569	75
GO:0014902	myotube differentiation	biological_process	44/12078	52/18422	1.2906	0.00184771	0.0579343	44
GO:0048013	ephrin receptor signaling pathway	biological_process	44/12078	52/18422	1.2906	0.00184771	0.0579343	44
GO:0099173	postsynapse organization	biological_process	44/12078	52/18422	1.2906	0.00184771	0.0579343	44
GO:0009967	positive regulation of signal transduction	biological_process	800/12078	1151/18422	1.06012	0.00187904	0.0586211	800
GO:0009987	cellular process	biological_process	9026/12078	13641/18422	1.00923	0.00188756	0.0587886	9026
GO:0001738	morphogenesis of a polarized epithelium	biological_process	31/12078	35/18422	1.35094	0.00194418	0.0601502	31
GO:0007044	cell-substrate junction assembly	biological_process	31/12078	35/18422	1.35094	0.00194418	0.0601502	31
GO:0070268	cornification	biological_process	31/12078	35/18422	1.35094	0.00194418	0.0601502	31
GO:0061061	muscle structure development	biological_process	297/12078	411/18422	1.10219	0.00198132	0.0609957	297
GO:0023056	positive regulation of signaling	biological_process	865/12078	1248/18422	1.05717	0.00200949	0.0616597	865
GO:0048634	regulation of muscle organ development	biological_process	85/12078	108/18422	1.20043	0.00201824	0.0618264	85
GO:0016070	RNA metabolic process	biological_process	1941/12078	2858/18422	1.03587	0.00206032	0.0629088	1941
GO:0016125	sterol metabolic process	biological_process	77/12078	97/18422	1.21077	0.00208795	0.0636484	77
GO:0015711	organic anion transport	biological_process	234/12078	320/18422	1.11534	0.00210983	0.0641572	234
GO:0010977	negative regulation of neuron projection development	biological_process	95/12078	122/18422	1.1877	0.00211152	0.0641572	95
GO:0048639	positive regulation of developmental growth	biological_process	110/12078	143/18422	1.17327	0.00211623	0.0641956	110
GO:0097435	supramolecular fiber organization	biological_process	263/12078	362/18422	1.10813	0.00214489	0.0649595	263
GO:1901653	cellular response to peptide	biological_process	139/12078	184/18422	1.15223	0.00216824	0.0655604	139
GO:1903706	regulation of hemopoiesis	biological_process	236/12078	323/18422	1.11443	0.00217464	0.0656472	236
GO:0021675	nerve development	biological_process	55/12078	67/18422	1.25207	0.00220298	0.0662883	55
GO:0021782	glial cell development	biological_process	55/12078	67/18422	1.25207	0.00220298	0.0662883	55
GO:0034115	negative regulation of heterotypic cell-cell adhesion	biological_process	27/12078	30/18422	1.37273	0.00227718	0.0678643	27
GO:0045687	positive regulation of glial cell differentiation	biological_process	27/12078	30/18422	1.37273	0.00227718	0.0678643	27
GO:0070587	regulation of cell-cell adhesion involved in gastrulation	biological_process	27/12078	30/18422	1.37273	0.00227718	0.0678643	27
GO:1903035	negative regulation of response to wounding	biological_process	49/12078	59/18422	1.26674	0.00235277	0.0698938	49
GO:0006865	amino acid transport	biological_process	79/12078	100/18422	1.20495	0.00236573	0.0699447	79
GO:0046330	positive regulation of JNK cascade	biological_process	79/12078	100/18422	1.20495	0.00236573	0.0699447	79
GO:0032870	cellular response to hormone stimulus	biological_process	271/12078	374/18422	1.1052	0.00237133	0.0699993	271
GO:0061572	actin filament bundle organization	biological_process	46/12078	55/18422	1.27567	0.00239666	0.0705237	46
GO:0051017	actin filament bundle assembly	biological_process	43/12078	51/18422	1.286	0.00240984	0.0708	43
GO:0015893	drug transport	biological_process	71/12078	89/18422	1.21677	0.00241662	0.0708876	71
GO:0071396	cellular response to lipid	biological_process	235/12078	322/18422	1.11315	0.00244839	0.0717067	235
GO:0014044	Schwann cell development	biological_process	19/12078	20/18422	1.44899	0.00246787	0.0719385	19
GO:0001933	negative regulation of protein phosphorylation	biological_process	246/12078	338/18422	1.1101	0.00250838	0.0729735	246
GO:0050974	detection of mechanical stimulus involved in sensory perception	biological_process	23/12078	25/18422	1.40323	0.00251511	0.0729735	23
GO:0060351	cartilage development involved in endochondral bone morphogenesis	biological_process	23/12078	25/18422	1.40323	0.00251511	0.0729735	23
GO:0072507	divalent inorganic cation homeostasis	biological_process	237/12078	325/18422	1.11226	0.0025201	0.0730046	237
GO:0019932	second-messenger-mediated signaling	biological_process	126/12078	166/18422	1.15772	0.00253261	0.0732306	126
GO:0007188	adenylate cyclase-modulating G protein-coupled receptor signaling pathway	biological_process	104/12078	135/18422	1.17501	0.00253575	0.0732306	104
GO:0048167	regulation of synaptic plasticity	biological_process	99/12078	128/18422	1.17969	0.00254526	0.0732875	99
GO:0033674	positive regulation of kinase activity	biological_process	277/12078	383/18422	1.10312	0.00254558	0.0732875	277
GO:0002682	regulation of immune system process	biological_process	696/12078	999/18422	1.06264	0.00257111	0.0739087	696
GO:0010647	positive regulation of cell communication	biological_process	859/12078	1241/18422	1.05575	0.00259064	0.0743553	859
GO:0006508	proteolysis	biological_process	583/12078	832/18422	1.06878	0.00263696	0.0754528	583
GO:0043551	regulation of phosphatidylinositol 3-kinase activity	biological_process	30/12078	34/18422	1.34581	0.00265028	0.0755803	30
GO:0080134	regulation of response to stress	biological_process	708/12078	1017/18422	1.06183	0.00265357	0.0755803	708
GO:0055080	cation homeostasis	biological_process	392/12078	551/18422	1.08512	0.00266363	0.075751	392
GO:0045603	positive regulation of endothelial cell differentiation	biological_process	14/12078	14/18422	1.52525	0.00270451	0.0766797	14
GO:0050803	regulation of synapse structure or activity	biological_process	111/12078	145/18422	1.16761	0.00271199	0.0767751	111
GO:0045596	negative regulation of cell differentiation	biological_process	411/12078	579/18422	1.08269	0.00274216	0.0774584	411
GO:0050804	modulation of chemical synaptic transmission	biological_process	191/12078	259/18422	1.1248	0.00274858	0.0774584	191
GO:0099177	regulation of trans-synaptic signaling	biological_process	191/12078	259/18422	1.1248	0.00274858	0.0774584	191
GO:0070304	positive regulation of stress-activated protein kinase signaling cascade	biological_process	91/12078	117/18422	1.18631	0.00276772	0.0778803	91
GO:0051146	striated muscle cell differentiation	biological_process	123/12078	162/18422	1.15806	0.00278053	0.0780055	123
GO:0060840	artery development	biological_process	54/12078	66/18422	1.24793	0.00278968	0.0781446	54
GO:0042063	gliogenesis	biological_process	118/12078	155/18422	1.16116	0.00285433	0.0796352	118
GO:0051924	regulation of calcium ion transport	biological_process	118/12078	155/18422	1.16116	0.00285433	0.0796352	118
GO:0002376	immune system process	biological_process	1159/12078	1689/18422	1.04664	0.0028557	0.0796352	1159
GO:0021537	telencephalon development	biological_process	156/12078	209/18422	1.13847	0.00287161	0.0799595	156
GO:0007528	neuromuscular junction development	biological_process	33/12078	38/18422	1.32456	0.00290371	0.0806125	33
GO:0042060	wound healing	biological_process	220/12078	301/18422	1.1148	0.00292698	0.0808973	220
GO:0030097	hemopoiesis	biological_process	315/12078	439/18422	1.09443	0.00298974	0.0825098	315
GO:0006909	phagocytosis	biological_process	98/12078	127/18422	1.17697	0.00303754	0.0835815	98
GO:0032835	glomerulus development	biological_process	36/12078	42/18422	1.30736	0.0030559	0.0839629	36
GO:1990138	neuron projection extension	biological_process	45/12078	54/18422	1.27104	0.0030916	0.0848189	45
GO:0030858	positive regulation of epithelial cell differentiation	biological_process	42/12078	50/18422	1.28121	0.00313325	0.0858355	42
GO:0010562	positive regulation of phosphorus metabolic process	biological_process	555/12078	792/18422	1.06883	0.00327329	0.0890182	555
GO:0045937	positive regulation of phosphate metabolic process	biological_process	555/12078	792/18422	1.06883	0.00327329	0.0890182	555
GO:0090287	regulation of cellular response to growth factor stimulus	biological_process	162/12078	218/18422	1.13344	0.00329437	0.0894612	162
GO:0032874	positive regulation of stress-activated MAPK cascade	biological_process	90/12078	116/18422	1.18339	0.0033222	0.0900857	90
GO:0009416	response to light stimulus	biological_process	164/12078	221/18422	1.13186	0.00343973	0.0931374	164
GO:0007193	adenylate cyclase-inhibiting G protein-coupled receptor signaling pathway	biological_process	53/12078	65/18422	1.24367	0.00352244	0.0951009	53
GO:0021511	spinal cord patterning	biological_process	22/12078	24/18422	1.39815	0.0035551	0.0952931	22
GO:0043954	cellular component maintenance	biological_process	22/12078	24/18422	1.39815	0.0035551	0.0952931	22
GO:0050779	RNA destabilization	biological_process	22/12078	24/18422	1.39815	0.0035551	0.0952931	22
GO:0060384	innervation	biological_process	22/12078	24/18422	1.39815	0.0035551	0.0952931	22
GO:0043393	regulation of protein binding	biological_process	119/12078	157/18422	1.15608	0.00357791	0.0952937	119
GO:1901861	regulation of muscle tissue development	biological_process	82/12078	105/18422	1.19115	0.00358775	0.0952937	82
GO:0006884	cell volume homeostasis	biological_process	18/12078	19/18422	1.44498	0.00359394	0.0952937	18
GO:0014075	response to amine	biological_process	18/12078	19/18422	1.44498	0.00359394	0.0952937	18
GO:0032331	negative regulation of chondrocyte differentiation	biological_process	18/12078	19/18422	1.44498	0.00359394	0.0952937	18
GO:0043567	regulation of insulin-like growth factor receptor signaling pathway	biological_process	18/12078	19/18422	1.44498	0.00359394	0.0952937	18
GO:0030204	chondroitin sulfate metabolic process	biological_process	29/12078	33/18422	1.34037	0.0036011	0.0952937	29
GO:0046503	glycerolipid catabolic process	biological_process	29/12078	33/18422	1.34037	0.0036011	0.0952937	29
GO:0032147	activation of protein kinase activity	biological_process	152/12078	204/18422	1.13646	0.00363072	0.0959415	152
GO:0010001	glial cell differentiation	biological_process	92/12078	119/18422	1.17919	0.0036371	0.0959741	92
GO:1903827	regulation of cellular protein localization	biological_process	289/12078	402/18422	1.09651	0.00364856	0.0961209	289
GO:0008203	cholesterol metabolic process	biological_process	69/12078	87/18422	1.20968	0.00365297	0.0961209	69
GO:1903530	regulation of secretion by cell	biological_process	369/12078	519/18422	1.08443	0.00372106	0.0976372	369
GO:0090257	regulation of muscle system process	biological_process	109/12078	143/18422	1.16261	0.00377631	0.098809	109
GO:0090596	sensory organ morphogenesis	biological_process	177/12078	240/18422	1.12487	0.00382602	0.0999696	177
GO:0006813	potassium ion transport	biological_process	104/12078	136/18422	1.16637	0.00385703	0.100358	104
GO:0051216	cartilage development	biological_process	104/12078	136/18422	1.16637	0.00385703	0.100358	104
GO:0009628	response to abiotic stimulus	biological_process	557/12078	796/18422	1.06729	0.0038626	0.100363	557
GO:0001706	endoderm formation	biological_process	32/12078	37/18422	1.31914	0.00388616	0.100753	32
GO:0060349	bone morphogenesis	biological_process	66/12078	83/18422	1.21285	0.00394139	0.101984	66
GO:0048844	artery morphogenesis	biological_process	41/12078	49/18422	1.27623	0.00406073	0.104637	41
GO:0021517	ventral spinal cord development	biological_process	38/12078	45/18422	1.28799	0.00408868	0.104742	38
GO:0051899	membrane depolarization	biological_process	38/12078	45/18422	1.28799	0.00408868	0.104742	38
GO:0016045	detection of bacterium	biological_process	13/12078	13/18422	1.52525	0.00412659	0.104742	13
GO:0045589	regulation of regulatory T cell differentiation	biological_process	13/12078	13/18422	1.52525	0.00412659	0.104742	13
GO:0060216	definitive hemopoiesis	biological_process	13/12078	13/18422	1.52525	0.00412659	0.104742	13
GO:0098543	detection of other organism	biological_process	13/12078	13/18422	1.52525	0.00412659	0.104742	13
GO:2001224	positive regulation of neuron migration	biological_process	13/12078	13/18422	1.52525	0.00412659	0.104742	13
GO:1903214	regulation of protein targeting to mitochondrion	biological_process	55/12078	68/18422	1.23366	0.0041838	0.105906	55
GO:1902532	negative regulation of intracellular signal transduction	biological_process	292/12078	407/18422	1.09428	0.00419566	0.106063	292
GO:0001817	regulation of cytokine production	biological_process	333/12078	467/18422	1.0876	0.00429235	0.10836	333
GO:0016202	regulation of striated muscle tissue development	biological_process	81/12078	104/18422	1.18794	0.0043262	0.10892	81
GO:0030203	glycosaminoglycan metabolic process	biological_process	91/12078	118/18422	1.17625	0.00434129	0.109152	91
GO:0045880	positive regulation of smoothened signaling pathway	biological_process	25/12078	28/18422	1.36183	0.00434996	0.109223	25
GO:0002520	immune system development	biological_process	365/12078	514/18422	1.08311	0.00440322	0.110412	365
GO:0022404	molting cycle process	biological_process	52/12078	64/18422	1.23927	0.00443447	0.110897	52
GO:0022405	hair cycle process	biological_process	52/12078	64/18422	1.23927	0.00443447	0.110897	52
GO:0048839	inner ear development	biological_process	127/12078	169/18422	1.1462	0.00452957	0.112973	127
GO:0016569	covalent chromatin modification	biological_process	317/12078	444/18422	1.08898	0.00466251	0.115978	317
GO:0043507	positive regulation of JUN kinase activity	biological_process	49/12078	60/18422	1.24562	0.0046764	0.116169	49
GO:0010563	negative regulation of phosphorus metabolic process	biological_process	321/12078	450/18422	1.08801	0.00480944	0.118684	321
GO:0008152	metabolic process	biological_process	5512/12078	8280/18422	1.01536	0.00487172	0.119856	5512
GO:0003333	amino acid transmembrane transport	biological_process	28/12078	32/18422	1.3346	0.00487621	0.119856	28
GO:0071704	organic substance metabolic process	biological_process	5259/12078	7895/18422	1.016	0.00493509	0.121036	5259
GO:0055074	calcium ion homeostasis	biological_process	220/12078	303/18422	1.10744	0.00493719	0.121036	220
GO:1901031	regulation of response to reactive oxygen species	biological_process	21/12078	23/18422	1.39262	0.00500979	0.122494	21
GO:0032970	regulation of actin filament-based process	biological_process	242/12078	335/18422	1.10182	0.00502915	0.122806	242
GO:0001701	in utero embryonic development	biological_process	204/12078	280/18422	1.11126	0.00515231	0.124836	204
GO:0007612	learning	biological_process	90/12078	117/18422	1.17327	0.00517047	0.124892	90
GO:0030199	collagen fibril organization	biological_process	31/12078	36/18422	1.31341	0.00518288	0.124892	31
GO:0050654	chondroitin sulfate proteoglycan metabolic process	biological_process	31/12078	36/18422	1.31341	0.00518288	0.124892	31
GO:1902743	regulation of lamellipodium organization	biological_process	31/12078	36/18422	1.31341	0.00518288	0.124892	31
GO:0016241	regulation of macroautophagy	biological_process	80/12078	103/18422	1.18466	0.0052043	0.124892	80
GO:0016358	dendrite development	biological_process	80/12078	103/18422	1.18466	0.0052043	0.124892	80
GO:0048565	digestive tract development	biological_process	80/12078	103/18422	1.18466	0.0052043	0.124892	80
GO:0050807	regulation of synapse organization	biological_process	107/12078	141/18422	1.15746	0.00521806	0.124892	107
GO:0097190	apoptotic signaling pathway	biological_process	170/12078	231/18422	1.12248	0.00523283	0.124998	170
GO:0045936	negative regulation of phosphate metabolic process	biological_process	320/12078	449/18422	1.08704	0.00528706	0.126044	320
GO:0043547	positive regulation of GTPase activity	biological_process	140/12078	188/18422	1.13583	0.0052901	0.126044	140
GO:0022408	negative regulation of cell-cell adhesion	biological_process	102/12078	134/18422	1.16101	0.00536484	0.127336	102
GO:0060541	respiratory system development	biological_process	114/12078	151/18422	1.15152	0.00537399	0.127392	114
GO:0009611	response to wounding	biological_process	261/12078	363/18422	1.09667	0.00546512	0.129166	261
GO:0007015	actin filament organization	biological_process	149/12078	201/18422	1.13066	0.00548968	0.129312	149
GO:0072503	cellular divalent inorganic cation homeostasis	biological_process	219/12078	302/18422	1.10606	0.00552835	0.130059	219
GO:0042127	regulation of cell population proliferation	biological_process	865/12078	1256/18422	1.05043	0.00554285	0.130236	865
GO:0090304	nucleic acid metabolic process	biological_process	2269/12078	3364/18422	1.02877	0.0056314	0.13215	2269
GO:0060759	regulation of response to cytokine stimulus	biological_process	77/12078	99/18422	1.18631	0.00568856	0.133324	77
GO:0007187	G protein-coupled receptor signaling pathway, coupled to cyclic nucleotide second messenger	biological_process	116/12078	154/18422	1.14889	0.00569614	0.133334	116
GO:0031056	regulation of histone modification	biological_process	82/12078	106/18422	1.17991	0.00570377	0.133345	82
GO:0007599	hemostasis	biological_process	137/12078	184/18422	1.13565	0.00581421	0.135618	137
GO:0007626	locomotory behavior	biological_process	130/12078	174/18422	1.13956	0.00581553	0.135618	130
GO:0002062	chondrocyte differentiation	biological_process	48/12078	59/18422	1.24088	0.00589963	0.137408	48
GO:0032715	negative regulation of interleukin-6 production	biological_process	24/12078	27/18422	1.35578	0.00598152	0.139141	24
GO:0002521	leukocyte differentiation	biological_process	187/12078	256/18422	1.11415	0.00600484	0.13951	187
GO:0009952	anterior/posterior pattern specification	biological_process	132/12078	177/18422	1.13748	0.0061017	0.141232	132
GO:0007156	homophilic cell adhesion via plasma membrane adhesion molecules	biological_process	106/12078	140/18422	1.15483	0.00611577	0.141383	106
GO:0003417	growth plate cartilage development	biological_process	12/12078	12/18422	1.52525	0.00629624	0.143422	12
GO:0033262	regulation of nuclear cell cycle DNA replication	biological_process	12/12078	12/18422	1.52525	0.00629624	0.143422	12
GO:0034397	telomere localization	biological_process	12/12078	12/18422	1.52525	0.00629624	0.143422	12
GO:0046323	glucose import	biological_process	12/12078	12/18422	1.52525	0.00629624	0.143422	12
GO:0051639	actin filament network formation	biological_process	12/12078	12/18422	1.52525	0.00629624	0.143422	12
GO:0072044	collecting duct development	biological_process	12/12078	12/18422	1.52525	0.00629624	0.143422	12
GO:0016239	positive regulation of macroautophagy	biological_process	42/12078	51/18422	1.25609	0.00650917	0.147927	42
GO:0060996	dendritic spine development	biological_process	27/12078	31/18422	1.32845	0.00657883	0.149312	27
GO:0044242	cellular lipid catabolic process	biological_process	115/12078	153/18422	1.14643	0.00662661	0.150214	115
GO:0050709	negative regulation of protein secretion	biological_process	66/12078	84/18422	1.19841	0.00665725	0.150725	66
GO:0035107	appendage morphogenesis	biological_process	103/12078	136/18422	1.15515	0.00672721	0.151392	103
GO:0035108	limb morphogenesis	biological_process	103/12078	136/18422	1.15515	0.00672721	0.151392	103
GO:0001525	angiogenesis	biological_process	195/12078	268/18422	1.10979	0.00673279	0.151392	195
GO:0046903	secretion	biological_process	428/12078	609/18422	1.07193	0.00673923	0.151392	428
GO:0007519	skeletal muscle tissue development	biological_process	86/12078	112/18422	1.17118	0.00674543	0.151392	86
GO:0010507	negative regulation of autophagy	biological_process	39/12078	47/18422	1.26564	0.0067516	0.151392	39
GO:0099175	regulation of postsynapse organization	biological_process	39/12078	47/18422	1.26564	0.0067516	0.151392	39
GO:0001959	regulation of cytokine-mediated signaling pathway	biological_process	71/12078	91/18422	1.19003	0.00678922	0.151688	71
GO:0002761	regulation of myeloid leukocyte differentiation	biological_process	71/12078	91/18422	1.19003	0.00678922	0.151688	71
GO:0030856	regulation of epithelial cell differentiation	biological_process	81/12078	105/18422	1.17662	0.00681848	0.15216	81
GO:0014910	regulation of smooth muscle cell migration	biological_process	30/12078	35/18422	1.30736	0.00688691	0.152949	30
GO:0015807	L-amino acid transport	biological_process	30/12078	35/18422	1.30736	0.00688691	0.152949	30
GO:0035136	forelimb morphogenesis	biological_process	30/12078	35/18422	1.30736	0.00688691	0.152949	30
GO:0009100	glycoprotein metabolic process	biological_process	250/12078	348/18422	1.09573	0.00689329	0.152949	250
GO:0001654	eye development	biological_process	217/12078	300/18422	1.10327	0.00690803	0.152949	217
GO:0150063	visual system development	biological_process	217/12078	300/18422	1.10327	0.00690803	0.152949	217
GO:0140352	export from cell	biological_process	396/12078	562/18422	1.07473	0.00691124	0.152949	396
GO:0007224	smoothened signaling pathway	biological_process	58/12078	73/18422	1.21184	0.00694839	0.153045	58
GO:0016579	protein deubiquitination	biological_process	124/12078	166/18422	1.13935	0.0070338	0.153355	124
GO:0032885	regulation of polysaccharide biosynthetic process	biological_process	20/12078	22/18422	1.38659	0.00703646	0.153355	20
GO:0061157	mRNA destabilization	biological_process	20/12078	22/18422	1.38659	0.00703646	0.153355	20
GO:0098751	bone cell development	biological_process	20/12078	22/18422	1.38659	0.00703646	0.153355	20
GO:1902475	L-alpha-amino acid transmembrane transport	biological_process	20/12078	22/18422	1.38659	0.00703646	0.153355	20
GO:1904837	beta-catenin-TCF complex assembly	biological_process	20/12078	22/18422	1.38659	0.00703646	0.153355	20
GO:1901360	organic cyclic compound metabolic process	biological_process	2782/12078	4142/18422	1.02445	0.00709284	0.154404	2782
GO:0048871	multicellular organismal homeostasis	biological_process	172/12078	235/18422	1.11636	0.00718961	0.156328	172
GO:0023061	signal release	biological_process	112/12078	149/18422	1.1465	0.00729158	0.158176	112
GO:1905952	regulation of lipid localization	biological_process	78/12078	101/18422	1.17792	0.00747674	0.162005	78
GO:0022011	myelination in peripheral nervous system	biological_process	16/12078	17/18422	1.43553	0.0075673	0.162084	16
GO:0032292	peripheral nervous system axon ensheathment	biological_process	16/12078	17/18422	1.43553	0.0075673	0.162084	16
GO:0032365	intracellular lipid transport	biological_process	16/12078	17/18422	1.43553	0.0075673	0.162084	16
GO:0036065	fucosylation	biological_process	16/12078	17/18422	1.43553	0.0075673	0.162084	16
GO:0071696	ectodermal placode development	biological_process	16/12078	17/18422	1.43553	0.0075673	0.162084	16
GO:1903205	regulation of hydrogen peroxide-induced cell death	biological_process	16/12078	17/18422	1.43553	0.0075673	0.162084	16
GO:2001024	negative regulation of response to drug	biological_process	16/12078	17/18422	1.43553	0.0075673	0.162084	16
GO:0098742	cell-cell adhesion via plasma-membrane adhesion molecules	biological_process	142/12078	192/18422	1.12805	0.00757857	0.16214	142
GO:0030099	myeloid cell differentiation	biological_process	114/12078	152/18422	1.14394	0.00769455	0.164433	114
GO:0061448	connective tissue development	biological_process	128/12078	172/18422	1.13507	0.0077269	0.164935	128
GO:0060538	skeletal muscle organ development	biological_process	90/12078	118/18422	1.16333	0.00783569	0.167066	90
GO:0032368	regulation of lipid transport	biological_process	60/12078	76/18422	1.20415	0.00786727	0.167166	60
GO:0032526	response to retinoic acid	biological_process	60/12078	76/18422	1.20415	0.00786727	0.167166	60
GO:0048640	negative regulation of developmental growth	biological_process	60/12078	76/18422	1.20415	0.00786727	0.167166	60
GO:0006875	cellular metal ion homeostasis	biological_process	292/12078	410/18422	1.08628	0.00791216	0.167929	292
GO:0006874	cellular calcium ion homeostasis	biological_process	209/12078	289/18422	1.10304	0.00803112	0.17026	209
GO:0050777	negative regulation of immune response	biological_process	65/12078	83/18422	1.19447	0.00808741	0.171258	65
GO:0006814	sodium ion transport	biological_process	80/12078	104/18422	1.17327	0.0081313	0.171387	80
GO:1903531	negative regulation of secretion by cell	biological_process	97/12078	128/18422	1.15586	0.00814488	0.171387	97
GO:0006367	transcription initiation from RNA polymerase II promoter	biological_process	70/12078	90/18422	1.18631	0.0081899	0.171387	70
GO:0001941	postsynaptic membrane organization	biological_process	23/12078	26/18422	1.34926	0.00819453	0.171387	23
GO:0030517	negative regulation of axon extension	biological_process	23/12078	26/18422	1.34926	0.00819453	0.171387	23
GO:2001038	regulation of cellular response to drug	biological_process	23/12078	26/18422	1.34926	0.00819453	0.171387	23
GO:0061045	negative regulation of wound healing	biological_process	41/12078	50/18422	1.25071	0.00828589	0.173104	41
GO:0051129	negative regulation of cellular component organization	biological_process	402/12078	572/18422	1.07194	0.0084374	0.176072	402
GO:0007017	microtubule-based process	biological_process	423/12078	603/18422	1.06995	0.00847192	0.176595	423
GO:0003012	muscle system process	biological_process	148/12078	201/18422	1.12307	0.008493	0.176836	148
GO:0043010	camera-type eye development	biological_process	184/12078	253/18422	1.10927	0.00856509	0.178139	184
GO:0010811	positive regulation of cell-substrate adhesion	biological_process	87/12078	114/18422	1.16401	0.00861783	0.178837	87
GO:0031424	keratinization	biological_process	38/12078	46/18422	1.25999	0.00865933	0.179498	38
GO:0001942	hair follicle development	biological_process	49/12078	61/18422	1.2252	0.00868345	0.179799	49
GO:0007596	blood coagulation	biological_process	134/12078	181/18422	1.12919	0.00878936	0.181588	134
GO:0050817	coagulation	biological_process	134/12078	181/18422	1.12919	0.00878936	0.181588	134
GO:0072006	nephron development	biological_process	82/12078	107/18422	1.16889	0.00879956	0.181598	82
GO:0052652	cyclic purine nucleotide metabolic process	biological_process	26/12078	30/18422	1.32189	0.00884173	0.181664	26
GO:0106027	neuron projection organization	biological_process	26/12078	30/18422	1.32189	0.00884173	0.181664	26
GO:0060627	regulation of vesicle-mediated transport	biological_process	280/12078	393/18422	1.08669	0.0088792	0.182234	280
GO:0010827	regulation of glucose transmembrane transport	biological_process	35/12078	42/18422	1.27104	0.00895381	0.18316	35
GO:0048880	sensory system development	biological_process	219/12078	304/18422	1.09878	0.00896776	0.183245	219
GO:0022617	extracellular matrix disassembly	biological_process	29/12078	34/18422	1.30095	0.00911581	0.185259	29
GO:0034446	substrate adhesion-dependent cell spreading	biological_process	29/12078	34/18422	1.30095	0.00911581	0.185259	29
GO:0034114	regulation of heterotypic cell-cell adhesion	biological_process	32/12078	38/18422	1.28442	0.00912593	0.185259	32
GO:2000179	positive regulation of neural precursor cell proliferation	biological_process	32/12078	38/18422	1.28442	0.00912593	0.185259	32
GO:0048592	eye morphogenesis	biological_process	101/12078	134/18422	1.14963	0.00919418	0.18624	101
GO:0042303	molting cycle	biological_process	54/12078	68/18422	1.21123	0.00924963	0.186957	54
GO:0042633	hair cycle	biological_process	54/12078	68/18422	1.21123	0.00924963	0.186957	54
GO:0045637	regulation of myeloid cell differentiation	biological_process	145/12078	197/18422	1.12265	0.00932341	0.188045	145
GO:0060491	regulation of cell projection assembly	biological_process	108/12078	144/18422	1.14394	0.00932364	0.188045	108
GO:0009612	response to mechanical stimulus	biological_process	115/12078	154/18422	1.13899	0.00937031	0.188579	115
GO:0010454	negative regulation of cell fate commitment	biological_process	11/12078	11/18422	1.52525	0.00960637	0.191675	11
GO:0032354	response to follicle-stimulating hormone	biological_process	11/12078	11/18422	1.52525	0.00960637	0.191675	11
GO:0090220	chromosome localization to nuclear envelope involved in homologous chromosome segregation	biological_process	11/12078	11/18422	1.52525	0.00960637	0.191675	11
GO:0032868	response to insulin	biological_process	103/12078	137/18422	1.14672	0.00972809	0.193897	103
GO:0021513	spinal cord dorsal/ventral patterning	biological_process	19/12078	21/18422	1.37999	0.00984769	0.19503	19
GO:0045724	positive regulation of cilium assembly	biological_process	19/12078	21/18422	1.37999	0.00984769	0.19503	19
GO:0065005	protein-lipid complex assembly	biological_process	19/12078	21/18422	1.37999	0.00984769	0.19503	19
GO:0098868	bone growth	biological_process	19/12078	21/18422	1.37999	0.00984769	0.19503	19
GO:2000036	regulation of stem cell population maintenance	biological_process	19/12078	21/18422	1.37999	0.00984769	0.19503	19
GO:0009913	epidermal cell differentiation	biological_process	91/12078	120/18422	1.15665	0.00987063	0.195277	91
GO:0002832	negative regulation of response to biotic stimulus	biological_process	43/12078	53/18422	1.23747	0.00991175	0.195469	43
GO:0007189	adenylate cyclase-activating G protein-coupled receptor signaling pathway	biological_process	43/12078	53/18422	1.23747	0.00991175	0.195469	43
GO:0030166	proteoglycan biosynthetic process	biological_process	43/12078	53/18422	1.23747	0.00991175	0.195469	43
GO:0032940	secretion by cell	biological_process	381/12078	542/18422	1.07218	0.00992521	0.195528	381
GO:0016042	lipid catabolic process	biological_process	167/12078	229/18422	1.1123	0.0100349	0.197272	167
GO:0006807	nitrogen compound metabolic process	biological_process	4658/12078	6993/18422	1.01596	0.0100563	0.197485	4658
GO:0045088	regulation of innate immune response	biological_process	187/12078	258/18422	1.10551	0.0101173	0.198219	187
GO:0030323	respiratory tube development	biological_process	98/12078	130/18422	1.14981	0.0101256	0.198219	98
GO:0006873	cellular ion homeostasis	biological_process	349/12078	495/18422	1.07538	0.0101608	0.1987	349
GO:0007369	gastrulation	biological_process	105/12078	140/18422	1.14394	0.0102672	0.20057	105
GO:0050954	sensory perception of mechanical stimulus	biological_process	119/12078	160/18422	1.13441	0.0102862	0.200732	119
GO:0051493	regulation of cytoskeleton organization	biological_process	319/12078	451/18422	1.07884	0.0103799	0.202349	319
GO:1990778	protein localization to cell periphery	biological_process	135/12078	183/18422	1.12519	0.0104475	0.203421	135
GO:0042552	myelination	biological_process	56/12078	71/18422	1.20302	0.0104567	0.203421	56
GO:0050771	negative regulation of axonogenesis	biological_process	40/12078	49/18422	1.2451	0.0105094	0.203596	40
GO:0051058	negative regulation of small GTPase mediated signal transduction	biological_process	40/12078	49/18422	1.2451	0.0105094	0.203596	40
GO:0048589	developmental growth	biological_process	224/12078	312/18422	1.09505	0.0105722	0.204601	224
GO:0009725	response to hormone	biological_process	378/12078	538/18422	1.07165	0.0106628	0.20614	378
GO:0019935	cyclic-nucleotide-mediated signaling	biological_process	61/12078	78/18422	1.19283	0.0107081	0.206802	61
GO:0060070	canonical Wnt signaling pathway	biological_process	71/12078	92/18422	1.1771	0.0107652	0.207061	71
GO:0008643	carbohydrate transport	biological_process	48/12078	60/18422	1.2202	0.0107926	0.207061	48
GO:0032479	regulation of type I interferon production	biological_process	66/12078	85/18422	1.18431	0.0107992	0.207061	66
GO:0071242	cellular response to ammonium ion	biological_process	66/12078	85/18422	1.18431	0.0107992	0.207061	66
GO:1903747	regulation of establishment of protein localization to mitochondrion	biological_process	66/12078	85/18422	1.18431	0.0107992	0.207061	66
GO:0021514	ventral spinal cord interneuron differentiation	biological_process	15/12078	16/18422	1.42992	0.0109356	0.207121	15
GO:0030220	platelet formation	biological_process	15/12078	16/18422	1.42992	0.0109356	0.207121	15
GO:0034377	plasma lipoprotein particle assembly	biological_process	15/12078	16/18422	1.42992	0.0109356	0.207121	15
GO:0036344	platelet morphogenesis	biological_process	15/12078	16/18422	1.42992	0.0109356	0.207121	15
GO:0046827	positive regulation of protein export from nucleus	biological_process	15/12078	16/18422	1.42992	0.0109356	0.207121	15
GO:0060788	ectodermal placode formation	biological_process	15/12078	16/18422	1.42992	0.0109356	0.207121	15
GO:0071697	ectodermal placode morphogenesis	biological_process	15/12078	16/18422	1.42992	0.0109356	0.207121	15
GO:1903861	positive regulation of dendrite extension	biological_process	15/12078	16/18422	1.42992	0.0109356	0.207121	15
GO:0043170	macromolecule metabolic process	biological_process	4201/12078	6300/18422	1.01708	0.0109641	0.20745	4201
GO:0014015	positive regulation of gliogenesis	biological_process	37/12078	45/18422	1.2541	0.0110644	0.208285	37
GO:0050982	detection of mechanical stimulus	biological_process	37/12078	45/18422	1.2541	0.0110644	0.208285	37
GO:0061515	myeloid cell development	biological_process	37/12078	45/18422	1.2541	0.0110644	0.208285	37
GO:0006022	aminoglycan metabolic process	biological_process	95/12078	126/18422	1.14999	0.0111544	0.208285	95
GO:0003382	epithelial cell morphogenesis	biological_process	22/12078	25/18422	1.34222	0.0111817	0.208285	22
GO:0006182	cGMP biosynthetic process	biological_process	22/12078	25/18422	1.34222	0.0111817	0.208285	22
GO:0045671	negative regulation of osteoclast differentiation	biological_process	22/12078	25/18422	1.34222	0.0111817	0.208285	22
GO:0060795	cell fate commitment involved in formation of primary germ layer	biological_process	22/12078	25/18422	1.34222	0.0111817	0.208285	22
GO:0031347	regulation of defense response	biological_process	316/12078	447/18422	1.07825	0.0111967	0.208285	316
GO:0051147	regulation of muscle cell differentiation	biological_process	83/12078	109/18422	1.16143	0.011198	0.208285	83
GO:0098727	maintenance of cell number	biological_process	83/12078	109/18422	1.16143	0.011198	0.208285	83
GO:0034764	positive regulation of transmembrane transport	biological_process	102/12078	136/18422	1.14394	0.0113092	0.209935	102
GO:0010876	lipid localization	biological_process	157/12078	215/18422	1.11379	0.0113515	0.21051	157
GO:0048641	regulation of skeletal muscle tissue development	biological_process	34/12078	41/18422	1.26484	0.0115398	0.213578	34
GO:0001558	regulation of cell growth	biological_process	234/12078	327/18422	1.09147	0.0115707	0.213645	234
GO:0051090	regulation of DNA-binding transcription factor activity	biological_process	234/12078	327/18422	1.09147	0.0115707	0.213645	234
GO:0001764	neuron migration	biological_process	90/12078	119/18422	1.15355	0.0115778	0.213645	90
GO:0001889	liver development	biological_process	58/12078	74/18422	1.19547	0.011697	0.215206	58
GO:1905269	positive regulation of chromatin organization	biological_process	58/12078	74/18422	1.19547	0.011697	0.215206	58
GO:0044260	cellular macromolecule metabolic process	biological_process	3666/12078	5489/18422	1.01869	0.0117234	0.215479	3666
GO:0002792	negative regulation of peptide secretion	biological_process	68/12078	88/18422	1.1786	0.011821	0.216665	68
GO:0014896	muscle hypertrophy	biological_process	25/12078	29/18422	1.31487	0.0118343	0.216665	25
GO:0048713	regulation of oligodendrocyte differentiation	biological_process	25/12078	29/18422	1.31487	0.0118343	0.216665	25
GO:1904659	glucose transmembrane transport	biological_process	25/12078	29/18422	1.31487	0.0118343	0.216665	25
GO:0097006	regulation of plasma lipoprotein particle levels	biological_process	31/12078	37/18422	1.27791	0.0118826	0.217122	31
GO:0097581	lamellipodium organization	biological_process	31/12078	37/18422	1.27791	0.0118826	0.217122	31
GO:0070646	protein modification by small protein removal	biological_process	134/12078	182/18422	1.12299	0.011911	0.217429	134
GO:0048675	axon extension	biological_process	28/12078	33/18422	1.29415	0.0120169	0.218719	28
GO:0055082	cellular chemical homeostasis	biological_process	393/12078	561/18422	1.06849	0.0123055	0.223131	393
GO:0098773	skin epidermis development	biological_process	50/12078	63/18422	1.21052	0.0123385	0.223131	50
GO:0051347	positive regulation of transferase activity	biological_process	317/12078	449/18422	1.07685	0.0123388	0.223131	317
GO:0022409	positive regulation of cell-cell adhesion	biological_process	136/12078	185/18422	1.12127	0.012343	0.223131	136
GO:0050885	neuromuscular process controlling balance	biological_process	42/12078	52/18422	1.23193	0.0124463	0.224563	42
GO:1900026	positive regulation of substrate adhesion-dependent cell spreading	biological_process	42/12078	52/18422	1.23193	0.0124463	0.224563	42
GO:0120032	regulation of plasma membrane bounded cell projection assembly	biological_process	106/12078	142/18422	1.13857	0.0125095	0.225485	106
GO:0032101	regulation of response to external stimulus	biological_process	480/12078	690/18422	1.06105	0.0128375	0.230729	480
GO:0045860	positive regulation of protein kinase activity	biological_process	248/12078	348/18422	1.08696	0.012948	0.232491	248
GO:0051403	stress-activated MAPK cascade	biological_process	60/12078	77/18422	1.18851	0.0129639	0.232553	60
GO:0018212	peptidyl-tyrosine modification	biological_process	65/12078	84/18422	1.18025	0.0129801	0.232619	65
GO:0031295	T cell costimulation	biological_process	39/12078	48/18422	1.23927	0.0132795	0.237528	39
GO:0071868	cellular response to monoamine stimulus	biological_process	47/12078	59/18422	1.21503	0.0133678	0.238422	47
GO:0071870	cellular response to catecholamine stimulus	biological_process	47/12078	59/18422	1.21503	0.0133678	0.238422	47
GO:0045619	regulation of lymphocyte differentiation	biological_process	89/12078	118/18422	1.1504	0.0135489	0.241379	89
GO:0034698	response to gonadotropin	biological_process	18/12078	20/18422	1.37273	0.0137285	0.243691	18
GO:0002831	regulation of response to biotic stimulus	biological_process	217/12078	303/18422	1.09234	0.0138486	0.245588	217
GO:1903364	positive regulation of cellular protein catabolic process	biological_process	72/12078	94/18422	1.16828	0.0139095	0.246434	72
GO:0044093	positive regulation of molecular function	biological_process	804/12078	1173/18422	1.04544	0.0139342	0.246638	804
GO:0046483	heterocycle metabolic process	biological_process	2635/12078	3930/18422	1.02266	0.0140782	0.248951	2635
GO:0050772	positive regulation of axonogenesis	biological_process	57/12078	73/18422	1.19095	0.0141967	0.250808	57
GO:0061008	hepaticobiliary system development	biological_process	62/12078	80/18422	1.18207	0.0142519	0.251082	62
GO:1903555	regulation of tumor necrosis factor superfamily cytokine production	biological_process	62/12078	80/18422	1.18207	0.0142519	0.251082	62
GO:0042391	regulation of membrane potential	biological_process	221/12078	309/18422	1.09088	0.0143359	0.251082	221
GO:1902903	regulation of supramolecular fiber organization	biological_process	221/12078	309/18422	1.09088	0.0143359	0.251082	221
GO:0045926	negative regulation of growth	biological_process	128/12078	174/18422	1.12202	0.0143793	0.251082	128
GO:0015849	organic acid transport	biological_process	155/12078	213/18422	1.10993	0.0144275	0.251082	155
GO:0046942	carboxylic acid transport	biological_process	155/12078	213/18422	1.10993	0.0144275	0.251082	155
GO:0044087	regulation of cellular component biogenesis	biological_process	532/12078	768/18422	1.05656	0.0144373	0.251082	532
GO:0007422	peripheral nervous system development	biological_process	44/12078	55/18422	1.2202	0.0144488	0.251082	44
GO:0045685	regulation of glial cell differentiation	biological_process	44/12078	55/18422	1.2202	0.0144488	0.251082	44
GO:0021521	ventral spinal cord interneuron specification	biological_process	10/12078	10/18422	1.52525	0.0146563	0.251082	10
GO:0021604	cranial nerve structural organization	biological_process	10/12078	10/18422	1.52525	0.0146563	0.251082	10
GO:0043568	positive regulation of insulin-like growth factor receptor signaling pathway	biological_process	10/12078	10/18422	1.52525	0.0146563	0.251082	10
GO:0044062	regulation of excretion	biological_process	10/12078	10/18422	1.52525	0.0146563	0.251082	10
GO:0045141	meiotic telomere clustering	biological_process	10/12078	10/18422	1.52525	0.0146563	0.251082	10
GO:0045725	positive regulation of glycogen biosynthetic process	biological_process	10/12078	10/18422	1.52525	0.0146563	0.251082	10
GO:0046321	positive regulation of fatty acid oxidation	biological_process	10/12078	10/18422	1.52525	0.0146563	0.251082	10
GO:0048009	insulin-like growth factor receptor signaling pathway	biological_process	10/12078	10/18422	1.52525	0.0146563	0.251082	10
GO:0048711	positive regulation of astrocyte differentiation	biological_process	10/12078	10/18422	1.52525	0.0146563	0.251082	10
GO:0060573	cell fate specification involved in pattern specification	biological_process	10/12078	10/18422	1.52525	0.0146563	0.251082	10
GO:0072017	distal tubule development	biological_process	10/12078	10/18422	1.52525	0.0146563	0.251082	10
GO:2000392	regulation of lamellipodium morphogenesis	biological_process	10/12078	10/18422	1.52525	0.0146563	0.251082	10
GO:0050953	sensory perception of light stimulus	biological_process	121/12078	164/18422	1.12534	0.0146875	0.251385	121
GO:0030003	cellular cation homeostasis	biological_process	338/12078	481/18422	1.0718	0.0149136	0.255022	338
GO:0032271	regulation of protein polymerization	biological_process	139/12078	190/18422	1.11584	0.014967	0.2557	139
GO:0002791	regulation of peptide secretion	biological_process	240/12078	337/18422	1.08623	0.0149897	0.255853	240
GO:0021543	pallium development	biological_process	107/12078	144/18422	1.13335	0.0151109	0.257687	107
GO:1902904	negative regulation of supramolecular fiber organization	biological_process	100/12078	134/18422	1.13825	0.0151877	0.257902	100
GO:0009605	response to external stimulus	biological_process	1106/12078	1626/18422	1.03747	0.015188	0.257902	1106
GO:0006949	syncytium formation	biological_process	21/12078	24/18422	1.3346	0.0151927	0.257902	21
GO:0031641	regulation of myelination	biological_process	21/12078	24/18422	1.3346	0.0151927	0.257902	21
GO:1901214	regulation of neuron death	biological_process	170/12078	235/18422	1.10337	0.0153718	0.25926	170
GO:0019827	stem cell population maintenance	biological_process	81/12078	107/18422	1.15463	0.0155101	0.25926	81
GO:0061024	membrane organization	biological_process	442/12078	635/18422	1.06167	0.0155474	0.25926	442
GO:0008630	intrinsic apoptotic signaling pathway in response to DNA damage	biological_process	41/12078	51/18422	1.22618	0.0155705	0.25926	41
GO:0071300	cellular response to retinoic acid	biological_process	41/12078	51/18422	1.22618	0.0155705	0.25926	41
GO:0010771	negative regulation of cell morphogenesis involved in differentiation	biological_process	59/12078	76/18422	1.18408	0.0156469	0.25926	59
GO:0007076	mitotic chromosome condensation	biological_process	14/12078	15/18422	1.42357	0.0157534	0.25926	14
GO:0016048	detection of temperature stimulus	biological_process	14/12078	15/18422	1.42357	0.0157534	0.25926	14
GO:0032012	regulation of ARF protein signal transduction	biological_process	14/12078	15/18422	1.42357	0.0157534	0.25926	14
GO:0035855	megakaryocyte development	biological_process	14/12078	15/18422	1.42357	0.0157534	0.25926	14
GO:0045932	negative regulation of muscle contraction	biological_process	14/12078	15/18422	1.42357	0.0157534	0.25926	14
GO:0060977	coronary vasculature morphogenesis	biological_process	14/12078	15/18422	1.42357	0.0157534	0.25926	14
GO:0071371	cellular response to gonadotropin stimulus	biological_process	14/12078	15/18422	1.42357	0.0157534	0.25926	14
GO:0072310	glomerular epithelial cell development	biological_process	14/12078	15/18422	1.42357	0.0157534	0.25926	14
GO:0097150	neuronal stem cell population maintenance	biological_process	14/12078	15/18422	1.42357	0.0157534	0.25926	14
GO:0001961	positive regulation of cytokine-mediated signaling pathway	biological_process	24/12078	28/18422	1.30736	0.0157709	0.25926	24
GO:0014897	striated muscle hypertrophy	biological_process	24/12078	28/18422	1.30736	0.0157709	0.25926	24
GO:0045824	negative regulation of innate immune response	biological_process	24/12078	28/18422	1.30736	0.0157709	0.25926	24
GO:0046058	cAMP metabolic process	biological_process	24/12078	28/18422	1.30736	0.0157709	0.25926	24
GO:0046324	regulation of glucose import	biological_process	24/12078	28/18422	1.30736	0.0157709	0.25926	24
GO:0021532	neural tube patterning	biological_process	27/12078	32/18422	1.28693	0.015773	0.25926	27
GO:0030850	prostate gland development	biological_process	27/12078	32/18422	1.28693	0.015773	0.25926	27
GO:0035137	hindlimb morphogenesis	biological_process	27/12078	32/18422	1.28693	0.015773	0.25926	27
GO:0046825	regulation of protein export from nucleus	biological_process	27/12078	32/18422	1.28693	0.015773	0.25926	27
GO:0048593	camera-type eye morphogenesis	biological_process	76/12078	100/18422	1.15919	0.0160376	0.263378	76
GO:0002683	negative regulation of immune system process	biological_process	224/12078	314/18422	1.08808	0.0163448	0.268186	224
GO:0001816	cytokine production	biological_process	71/12078	93/18422	1.16444	0.0165007	0.27027	71
GO:0050776	regulation of immune response	biological_process	412/12078	591/18422	1.06329	0.0165807	0.271201	412
GO:0050773	regulation of dendrite development	biological_process	90/12078	120/18422	1.14394	0.0166992	0.272564	90
GO:1903707	negative regulation of hemopoiesis	biological_process	90/12078	120/18422	1.14394	0.0166992	0.272564	90
GO:0050708	regulation of protein secretion	biological_process	228/12078	320/18422	1.08674	0.0168529	0.274591	228
GO:0032869	cellular response to insulin stimulus	biological_process	78/12078	103/18422	1.15505	0.0171101	0.277848	78
GO:0046890	regulation of lipid biosynthetic process	biological_process	85/12078	113/18422	1.14731	0.0174515	0.283109	85
GO:0042326	negative regulation of phosphorylation	biological_process	264/12078	373/18422	1.07954	0.0175636	0.284681	264
GO:0046889	positive regulation of lipid biosynthetic process	biological_process	35/12078	43/18422	1.24148	0.0178502	0.288345	35
GO:0002504	antigen processing and presentation of peptide or polysaccharide antigen via MHC class II	biological_process	43/12078	54/18422	1.21455	0.0179134	0.288345	43
GO:0007266	Rho protein signal transduction	biological_process	43/12078	54/18422	1.21455	0.0179134	0.288345	43
GO:0009187	cyclic nucleotide metabolic process	biological_process	43/12078	54/18422	1.21455	0.0179134	0.288345	43
GO:0045844	positive regulation of striated muscle tissue development	biological_process	43/12078	54/18422	1.21455	0.0179134	0.288345	43
GO:0048636	positive regulation of muscle organ development	biological_process	43/12078	54/18422	1.21455	0.0179134	0.288345	43
GO:1901863	positive regulation of muscle tissue development	biological_process	43/12078	54/18422	1.21455	0.0179134	0.288345	43
GO:0051249	regulation of lymphocyte activation	biological_process	223/12078	313/18422	1.08668	0.0180066	0.289596	223
GO:0007018	microtubule-based movement	biological_process	186/12078	259/18422	1.09536	0.018236	0.293033	186
GO:0030326	embryonic limb morphogenesis	biological_process	87/12078	116/18422	1.14394	0.0184243	0.295548	87
GO:0035113	embryonic appendage morphogenesis	biological_process	87/12078	116/18422	1.14394	0.0184243	0.295548	87
GO:0006869	lipid transport	biological_process	144/12078	198/18422	1.10927	0.0184471	0.295654	144
GO:0030324	lung development	biological_process	94/12078	126/18422	1.13789	0.0184625	0.295654	94
GO:1903955	positive regulation of protein targeting to mitochondrion	biological_process	48/12078	61/18422	1.2002	0.0185801	0.296637	48
GO:0050865	regulation of cell activation	biological_process	274/12078	388/18422	1.07711	0.0185872	0.296637	274
GO:0018108	peptidyl-tyrosine phosphorylation	biological_process	63/12078	82/18422	1.17184	0.0185875	0.296637	63
GO:0009314	response to radiation	biological_process	229/12078	322/18422	1.08473	0.0188095	0.298771	229
GO:0007272	ensheathment of neurons	biological_process	58/12078	75/18422	1.17953	0.0188259	0.298771	58
GO:0008366	axon ensheathment	biological_process	58/12078	75/18422	1.17953	0.0188259	0.298771	58
GO:0031644	regulation of nervous system process	biological_process	58/12078	75/18422	1.17953	0.0188259	0.298771	58
GO:0030837	negative regulation of actin filament polymerization	biological_process	53/12078	68/18422	1.1888	0.0188496	0.298771	53
GO:0046637	regulation of alpha-beta T cell differentiation	biological_process	32/12078	39/18422	1.25149	0.0189323	0.298771	32
GO:0002089	lens morphogenesis in camera-type eye	biological_process	17/12078	19/18422	1.3647	0.0190575	0.298771	17
GO:0003416	endochondral bone growth	biological_process	17/12078	19/18422	1.3647	0.0190575	0.298771	17
GO:0007045	cell-substrate adherens junction assembly	biological_process	17/12078	19/18422	1.3647	0.0190575	0.298771	17
GO:0009595	detection of biotic stimulus	biological_process	17/12078	19/18422	1.3647	0.0190575	0.298771	17
GO:0014812	muscle cell migration	biological_process	17/12078	19/18422	1.3647	0.0190575	0.298771	17
GO:0030219	megakaryocyte differentiation	biological_process	17/12078	19/18422	1.3647	0.0190575	0.298771	17
GO:0045923	positive regulation of fatty acid metabolic process	biological_process	17/12078	19/18422	1.3647	0.0190575	0.298771	17
GO:0046320	regulation of fatty acid oxidation	biological_process	17/12078	19/18422	1.3647	0.0190575	0.298771	17
GO:0046847	filopodium assembly	biological_process	17/12078	19/18422	1.3647	0.0190575	0.298771	17
GO:0048041	focal adhesion assembly	biological_process	17/12078	19/18422	1.3647	0.0190575	0.298771	17
GO:0070723	response to cholesterol	biological_process	17/12078	19/18422	1.3647	0.0190575	0.298771	17
GO:1904645	response to amyloid-beta	biological_process	17/12078	19/18422	1.3647	0.0190575	0.298771	17
GO:0043122	regulation of I-kappaB kinase/NF-kappaB signaling	biological_process	128/12078	175/18422	1.11561	0.0191807	0.30045	128
GO:0006898	receptor-mediated endocytosis	biological_process	89/12078	119/18422	1.14074	0.0193964	0.302973	89
GO:0043502	regulation of muscle adaptation	biological_process	40/12078	50/18422	1.2202	0.0194034	0.302973	40
GO:0033673	negative regulation of kinase activity	biological_process	139/12078	191/18422	1.11	0.0196678	0.306792	139
GO:0050994	regulation of lipid catabolic process	biological_process	29/12078	35/18422	1.26378	0.0198888	0.309463	29
GO:0008360	regulation of cell shape	biological_process	98/12078	132/18422	1.13238	0.020221	0.31437	98
GO:0046649	lymphocyte activation	biological_process	211/12078	296/18422	1.08726	0.0202566	0.31466	211
GO:0019233	sensory perception of pain	biological_process	45/12078	57/18422	1.20415	0.0202881	0.314888	45
GO:0071900	regulation of protein serine/threonine kinase activity	biological_process	226/12078	318/18422	1.08398	0.0203809	0.315146	226
GO:0032680	regulation of tumor necrosis factor production	biological_process	60/12078	78/18422	1.17327	0.0204833	0.315146	60
GO:0042476	odontogenesis	biological_process	60/12078	78/18422	1.17327	0.0204833	0.315146	60
GO:0000768	syncytium formation by plasma membrane fusion	biological_process	20/12078	23/18422	1.32631	0.0205476	0.315146	20
GO:0007271	synaptic transmission, cholinergic	biological_process	20/12078	23/18422	1.32631	0.0205476	0.315146	20
GO:0008045	motor neuron axon guidance	biological_process	20/12078	23/18422	1.32631	0.0205476	0.315146	20
GO:0014911	positive regulation of smooth muscle cell migration	biological_process	20/12078	23/18422	1.32631	0.0205476	0.315146	20
GO:0016572	histone phosphorylation	biological_process	20/12078	23/18422	1.32631	0.0205476	0.315146	20
GO:0034122	negative regulation of toll-like receptor signaling pathway	biological_process	20/12078	23/18422	1.32631	0.0205476	0.315146	20
GO:0048333	mesodermal cell differentiation	biological_process	20/12078	23/18422	1.32631	0.0205476	0.315146	20
GO:0061037	negative regulation of cartilage development	biological_process	20/12078	23/18422	1.32631	0.0205476	0.315146	20
GO:0140253	cell-cell fusion	biological_process	20/12078	23/18422	1.32631	0.0205476	0.315146	20
GO:1900271	regulation of long-term synaptic potentiation	biological_process	20/12078	23/18422	1.32631	0.0205476	0.315146	20
GO:0021522	spinal cord motor neuron differentiation	biological_process	26/12078	31/18422	1.27924	0.0206088	0.315146	26
GO:0032890	regulation of organic acid transport	biological_process	26/12078	31/18422	1.27924	0.0206088	0.315146	26
GO:0060760	positive regulation of response to cytokine stimulus	biological_process	26/12078	31/18422	1.27924	0.0206088	0.315146	26
GO:0071825	protein-lipid complex subunit organization	biological_process	26/12078	31/18422	1.27924	0.0206088	0.315146	26
GO:0090311	regulation of protein deacetylation	biological_process	26/12078	31/18422	1.27924	0.0206088	0.315146	26
GO:0019933	cAMP-mediated signaling	biological_process	55/12078	71/18422	1.18153	0.020712	0.315689	55
GO:2000060	positive regulation of ubiquitin-dependent protein catabolic process	biological_process	55/12078	71/18422	1.18153	0.020712	0.315689	55
GO:2001237	negative regulation of extrinsic apoptotic signaling pathway	biological_process	55/12078	71/18422	1.18153	0.020712	0.315689	55
GO:0006725	cellular aromatic compound metabolic process	biological_process	2652/12078	3962/18422	1.02094	0.0207936	0.316673	2652
GO:0003231	cardiac ventricle development	biological_process	72/12078	95/18422	1.15598	0.0208474	0.316779	72
GO:1902652	secondary alcohol metabolic process	biological_process	72/12078	95/18422	1.15598	0.0208474	0.316779	72
GO:0030513	positive regulation of BMP signaling pathway	biological_process	23/12078	27/18422	1.29929	0.0209193	0.316779	23
GO:0050650	chondroitin sulfate proteoglycan biosynthetic process	biological_process	23/12078	27/18422	1.29929	0.0209193	0.316779	23
GO:0097061	dendritic spine organization	biological_process	23/12078	27/18422	1.29929	0.0209193	0.316779	23
GO:0006935	chemotaxis	biological_process	281/12078	399/18422	1.07418	0.0210945	0.318913	281
GO:0042330	taxis	biological_process	281/12078	399/18422	1.07418	0.0210945	0.318913	281
GO:0051098	regulation of binding	biological_process	191/12078	267/18422	1.0911	0.0213495	0.322507	191
GO:0010822	positive regulation of mitochondrion organization	biological_process	86/12078	115/18422	1.14062	0.0214077	0.323124	86
GO:0046328	regulation of JNK cascade	biological_process	109/12078	148/18422	1.12333	0.0215243	0.323952	109
GO:0051282	regulation of sequestering of calcium ion	biological_process	67/12078	88/18422	1.16127	0.0215488	0.323952	67
GO:0007601	visual perception	biological_process	118/12078	161/18422	1.11789	0.0217125	0.323952	118
GO:0034762	regulation of transmembrane transport	biological_process	221/12078	311/18422	1.08386	0.0217804	0.323952	221
GO:0014013	regulation of gliogenesis	biological_process	62/12078	81/18422	1.16748	0.0221425	0.323952	62
GO:0043112	receptor metabolic process	biological_process	62/12078	81/18422	1.16748	0.0221425	0.323952	62
GO:0120034	positive regulation of plasma membrane bounded cell projection assembly	biological_process	62/12078	81/18422	1.16748	0.0221425	0.323952	62
GO:0043583	ear development	biological_process	138/12078	190/18422	1.10781	0.022145	0.323952	138
GO:0046883	regulation of hormone secretion	biological_process	138/12078	190/18422	1.10781	0.022145	0.323952	138
GO:0043434	response to peptide hormone	biological_process	149/12078	206/18422	1.10322	0.0223545	0.323952	149
GO:0006560	proline metabolic process	biological_process	9/12078	9/18422	1.52525	0.0223603	0.323952	9
GO:0014067	negative regulation of phosphatidylinositol 3-kinase signaling	biological_process	9/12078	9/18422	1.52525	0.0223603	0.323952	9
GO:0014909	smooth muscle cell migration	biological_process	9/12078	9/18422	1.52525	0.0223603	0.323952	9
GO:0021561	facial nerve development	biological_process	9/12078	9/18422	1.52525	0.0223603	0.323952	9
GO:0021610	facial nerve morphogenesis	biological_process	9/12078	9/18422	1.52525	0.0223603	0.323952	9
GO:0032836	glomerular basement membrane development	biological_process	9/12078	9/18422	1.52525	0.0223603	0.323952	9
GO:0035090	maintenance of apical/basal cell polarity	biological_process	9/12078	9/18422	1.52525	0.0223603	0.323952	9
GO:0035331	negative regulation of hippo signaling	biological_process	9/12078	9/18422	1.52525	0.0223603	0.323952	9
GO:0038202	TORC1 signaling	biological_process	9/12078	9/18422	1.52525	0.0223603	0.323952	9
GO:0045199	maintenance of epithelial cell apical/basal polarity	biological_process	9/12078	9/18422	1.52525	0.0223603	0.323952	9
GO:0061430	bone trabecula morphogenesis	biological_process	9/12078	9/18422	1.52525	0.0223603	0.323952	9
GO:0071295	cellular response to vitamin	biological_process	9/12078	9/18422	1.52525	0.0223603	0.323952	9
GO:0071372	cellular response to follicle-stimulating hormone stimulus	biological_process	9/12078	9/18422	1.52525	0.0223603	0.323952	9
GO:0097106	postsynaptic density organization	biological_process	9/12078	9/18422	1.52525	0.0223603	0.323952	9
GO:0099084	postsynaptic specialization organization	biological_process	9/12078	9/18422	1.52525	0.0223603	0.323952	9
GO:1900451	positive regulation of glutamate receptor signaling pathway	biological_process	9/12078	9/18422	1.52525	0.0223603	0.323952	9
GO:1901077	regulation of relaxation of muscle	biological_process	9/12078	9/18422	1.52525	0.0223603	0.323952	9
GO:1903599	positive regulation of autophagy of mitochondrion	biological_process	9/12078	9/18422	1.52525	0.0223603	0.323952	9
GO:1905208	negative regulation of cardiocyte differentiation	biological_process	9/12078	9/18422	1.52525	0.0223603	0.323952	9
GO:2001040	positive regulation of cellular response to drug	biological_process	9/12078	9/18422	1.52525	0.0223603	0.323952	9
GO:0032330	regulation of chondrocyte differentiation	biological_process	34/12078	42/18422	1.23473	0.0225304	0.323952	34
GO:0046580	negative regulation of Ras protein signal transduction	biological_process	34/12078	42/18422	1.23473	0.0225304	0.323952	34
GO:0002698	negative regulation of immune effector process	biological_process	57/12078	74/18422	1.17486	0.022578	0.323952	57
GO:1900180	regulation of protein localization to nucleus	biological_process	57/12078	74/18422	1.17486	0.022578	0.323952	57
GO:0003413	chondrocyte differentiation involved in endochondral bone morphogenesis	biological_process	13/12078	14/18422	1.41631	0.0226136	0.323952	13
GO:0008631	intrinsic apoptotic signaling pathway in response to oxidative stress	biological_process	13/12078	14/18422	1.41631	0.0226136	0.323952	13
GO:0036473	cell death in response to oxidative stress	biological_process	13/12078	14/18422	1.41631	0.0226136	0.323952	13
GO:0043090	amino acid import	biological_process	13/12078	14/18422	1.41631	0.0226136	0.323952	13
GO:0051968	positive regulation of synaptic transmission, glutamatergic	biological_process	13/12078	14/18422	1.41631	0.0226136	0.323952	13
GO:0060579	ventral spinal cord interneuron fate commitment	biological_process	13/12078	14/18422	1.41631	0.0226136	0.323952	13
GO:0060581	cell fate commitment involved in pattern specification	biological_process	13/12078	14/18422	1.41631	0.0226136	0.323952	13
GO:0072015	glomerular visceral epithelial cell development	biological_process	13/12078	14/18422	1.41631	0.0226136	0.323952	13
GO:0090136	epithelial cell-cell adhesion	biological_process	13/12078	14/18422	1.41631	0.0226136	0.323952	13
GO:0007009	plasma membrane organization	biological_process	47/12078	60/18422	1.19478	0.0226781	0.323952	47
GO:0007043	cell-cell junction assembly	biological_process	47/12078	60/18422	1.19478	0.0226781	0.323952	47
GO:0043242	negative regulation of protein complex disassembly	biological_process	47/12078	60/18422	1.19478	0.0226781	0.323952	47
GO:0071867	response to monoamine	biological_process	47/12078	60/18422	1.19478	0.0226781	0.323952	47
GO:0071869	response to catecholamine	biological_process	47/12078	60/18422	1.19478	0.0226781	0.323952	47
GO:1903825	organic acid transmembrane transport	biological_process	47/12078	60/18422	1.19478	0.0226781	0.323952	47
GO:1905039	carboxylic acid transmembrane transport	biological_process	47/12078	60/18422	1.19478	0.0226781	0.323952	47
GO:0001656	metanephros development	biological_process	52/12078	67/18422	1.18378	0.0227874	0.324768	52
GO:0030048	actin filament-based movement	biological_process	52/12078	67/18422	1.18378	0.0227874	0.324768	52
GO:0051591	response to cAMP	biological_process	52/12078	67/18422	1.18378	0.0227874	0.324768	52
GO:0044237	cellular metabolic process	biological_process	5132/12078	7730/18422	1.01263	0.0229898	0.327403	5132
GO:0015850	organic hydroxy compound transport	biological_process	69/12078	91/18422	1.15651	0.0230272	0.327686	69
GO:0030100	regulation of endocytosis	biological_process	97/12078	131/18422	1.12939	0.0232554	0.330681	97
GO:0030010	establishment of cell polarity	biological_process	76/12078	101/18422	1.14771	0.0234926	0.333798	76
GO:0044238	primary metabolic process	biological_process	4999/12078	7528/18422	1.01285	0.0235344	0.333963	4999
GO:0051222	positive regulation of protein transport	biological_process	233/12078	329/18422	1.08019	0.0235399	0.333963	233
GO:0003018	vascular process in circulatory system	biological_process	83/12078	111/18422	1.1405	0.0236374	0.334836	83
GO:1905330	regulation of morphogenesis of an epithelium	biological_process	83/12078	111/18422	1.1405	0.0236374	0.334836	83
GO:0090630	activation of GTPase activity	biological_process	64/12078	84/18422	1.1621	0.0237985	0.336863	64
GO:0042176	regulation of protein catabolic process	biological_process	205/12078	288/18422	1.08568	0.0238526	0.337372	205
GO:1904951	positive regulation of establishment of protein localization	biological_process	252/12078	357/18422	1.07665	0.0238752	0.337436	252
GO:0016053	organic acid biosynthetic process	biological_process	155/12078	215/18422	1.0996	0.0239256	0.337893	155
GO:0031294	lymphocyte costimulation	biological_process	39/12078	49/18422	1.21398	0.0240827	0.339197	39
GO:0033273	response to vitamin	biological_process	31/12078	38/18422	1.24428	0.0240907	0.339197	31
GO:0034219	carbohydrate transmembrane transport	biological_process	31/12078	38/18422	1.24428	0.0240907	0.339197	31
GO:0035904	aorta development	biological_process	31/12078	38/18422	1.24428	0.0240907	0.339197	31
GO:1903749	positive regulation of establishment of protein localization to mitochondrion	biological_process	59/12078	77/18422	1.1687	0.024441	0.343352	59
GO:0042472	inner ear morphogenesis	biological_process	71/12078	94/18422	1.15205	0.0244998	0.343919	71
GO:0007416	synapse assembly	biological_process	49/12078	63/18422	1.18631	0.0250696	0.351653	49
GO:0030534	adult behavior	biological_process	101/12078	137/18422	1.12446	0.025154	0.352572	101
GO:0006469	negative regulation of protein kinase activity	biological_process	128/12078	176/18422	1.10927	0.0252216	0.353255	128
GO:0006936	muscle contraction	biological_process	119/12078	163/18422	1.11353	0.0254057	0.355565	119
GO:0008645	hexose transmembrane transport	biological_process	28/12078	34/18422	1.25609	0.0255552	0.356547	28
GO:0032371	regulation of sterol transport	biological_process	28/12078	34/18422	1.25609	0.0255552	0.356547	28
GO:0032374	regulation of cholesterol transport	biological_process	28/12078	34/18422	1.25609	0.0255552	0.356547	28
GO:0043269	regulation of ion transport	biological_process	285/12078	406/18422	1.07068	0.0255714	0.356547	285
GO:0051641	cellular localization	biological_process	1275/12078	1886/18422	1.03112	0.0256498	0.357373	1275
GO:0030522	intracellular receptor signaling pathway	biological_process	73/12078	97/18422	1.14787	0.0259639	0.360951	73
GO:0044257	cellular protein catabolic process	biological_process	360/12078	517/18422	1.06207	0.0260643	0.360951	360
GO:0070647	protein modification by small protein conjugation or removal	biological_process	496/12078	719/18422	1.05219	0.026127	0.360951	496
GO:0030216	keratinocyte differentiation	biological_process	61/12078	80/18422	1.16301	0.0262955	0.360951	61
GO:0002694	regulation of leukocyte activation	biological_process	253/12078	359/18422	1.0749	0.0262974	0.360951	253
GO:0005979	regulation of glycogen biosynthetic process	biological_process	16/12078	18/18422	1.35578	0.0263322	0.360951	16
GO:0007520	myoblast fusion	biological_process	16/12078	18/18422	1.35578	0.0263322	0.360951	16
GO:0010962	regulation of glucan biosynthetic process	biological_process	16/12078	18/18422	1.35578	0.0263322	0.360951	16
GO:0018149	peptide cross-linking	biological_process	16/12078	18/18422	1.35578	0.0263322	0.360951	16
GO:0030011	maintenance of cell polarity	biological_process	16/12078	18/18422	1.35578	0.0263322	0.360951	16
GO:0032495	response to muramyl dipeptide	biological_process	16/12078	18/18422	1.35578	0.0263322	0.360951	16
GO:0034381	plasma lipoprotein particle clearance	biological_process	16/12078	18/18422	1.35578	0.0263322	0.360951	16
GO:0048643	positive regulation of skeletal muscle tissue development	biological_process	16/12078	18/18422	1.35578	0.0263322	0.360951	16
GO:0061339	establishment or maintenance of monopolar cell polarity	biological_process	16/12078	18/18422	1.35578	0.0263322	0.360951	16
GO:0098581	detection of external biotic stimulus	biological_process	16/12078	18/18422	1.35578	0.0263322	0.360951	16
GO:1903859	regulation of dendrite extension	biological_process	16/12078	18/18422	1.35578	0.0263322	0.360951	16
GO:1904646	cellular response to amyloid-beta	biological_process	16/12078	18/18422	1.35578	0.0263322	0.360951	16
GO:0014003	oligodendrocyte development	biological_process	25/12078	30/18422	1.27104	0.0267974	0.36652	25
GO:0098815	modulation of excitatory postsynaptic potential	biological_process	25/12078	30/18422	1.27104	0.0267974	0.36652	25
GO:2000279	negative regulation of DNA biosynthetic process	biological_process	25/12078	30/18422	1.27104	0.0267974	0.36652	25
GO:0030833	regulation of actin filament polymerization	biological_process	114/12078	156/18422	1.11461	0.0270801	0.369381	114
GO:0003279	cardiac septum development	biological_process	68/12078	90/18422	1.15241	0.0270858	0.369381	68
GO:0072009	nephron epithelium development	biological_process	68/12078	90/18422	1.15241	0.0270858	0.369381	68
GO:0048584	positive regulation of response to stimulus	biological_process	1081/12078	1595/18422	1.03373	0.0271865	0.370062	1081
GO:0060350	endochondral bone morphogenesis	biological_process	41/12078	52/18422	1.2026	0.0272151	0.370062	41
GO:0061337	cardiac conduction	biological_process	41/12078	52/18422	1.2026	0.0272151	0.370062	41
GO:0003014	renal system process	biological_process	51/12078	66/18422	1.1786	0.0274516	0.370336	51
GO:0031058	positive regulation of histone modification	biological_process	51/12078	66/18422	1.1786	0.0274516	0.370336	51
GO:0014033	neural crest cell differentiation	biological_process	46/12078	59/18422	1.18918	0.0275769	0.370336	46
GO:0042475	odontogenesis of dentin-containing tooth	biological_process	46/12078	59/18422	1.18918	0.0275769	0.370336	46
GO:0097306	cellular response to alcohol	biological_process	46/12078	59/18422	1.18918	0.0275769	0.370336	46
GO:0003300	cardiac muscle hypertrophy	biological_process	22/12078	26/18422	1.2906	0.0276111	0.370336	22
GO:0071827	plasma lipoprotein particle organization	biological_process	22/12078	26/18422	1.2906	0.0276111	0.370336	22
GO:0090218	positive regulation of lipid kinase activity	biological_process	22/12078	26/18422	1.2906	0.0276111	0.370336	22
GO:1902667	regulation of axon guidance	biological_process	22/12078	26/18422	1.2906	0.0276111	0.370336	22
GO:0030206	chondroitin sulfate biosynthetic process	biological_process	19/12078	22/18422	1.31726	0.0276521	0.370336	19
GO:0031929	TOR signaling	biological_process	19/12078	22/18422	1.31726	0.0276521	0.370336	19
GO:0034110	regulation of homotypic cell-cell adhesion	biological_process	19/12078	22/18422	1.31726	0.0276521	0.370336	19
GO:0046461	neutral lipid catabolic process	biological_process	19/12078	22/18422	1.31726	0.0276521	0.370336	19
GO:0046464	acylglycerol catabolic process	biological_process	19/12078	22/18422	1.31726	0.0276521	0.370336	19
GO:0050869	negative regulation of B cell activation	biological_process	19/12078	22/18422	1.31726	0.0276521	0.370336	19
GO:0072010	glomerular epithelium development	biological_process	19/12078	22/18422	1.31726	0.0276521	0.370336	19
GO:1903203	regulation of oxidative stress-induced neuron death	biological_process	19/12078	22/18422	1.31726	0.0276521	0.370336	19
GO:0030183	B cell differentiation	biological_process	63/12078	83/18422	1.15772	0.028137	0.375751	63
GO:0030879	mammary gland development	biological_process	63/12078	83/18422	1.15772	0.028137	0.375751	63
GO:0006855	drug transmembrane transport	biological_process	33/12078	41/18422	1.22764	0.0283117	0.376887	33
GO:0034121	regulation of toll-like receptor signaling pathway	biological_process	33/12078	41/18422	1.22764	0.0283117	0.376887	33
GO:0008015	blood circulation	biological_process	186/12078	261/18422	1.08696	0.0283231	0.376887	186
GO:0032956	regulation of actin cytoskeleton organization	biological_process	216/12078	305/18422	1.08018	0.0283825	0.377408	216
GO:0014020	primary neural tube formation	biological_process	70/12078	93/18422	1.14804	0.0287106	0.381499	70
GO:0003013	circulatory system process	biological_process	188/12078	264/18422	1.08616	0.0287532	0.381793	188
GO:0006139	nucleobase-containing compound metabolic process	biological_process	2540/12078	3798/18422	1.02005	0.0288934	0.383382	2540
GO:0046394	carboxylic acid biosynthetic process	biological_process	153/12078	213/18422	1.0956	0.0297225	0.39329	153
GO:0030072	peptide hormone secretion	biological_process	38/12078	48/18422	1.20749	0.0297661	0.39329	38
GO:0010632	regulation of epithelial cell migration	biological_process	111/12078	152/18422	1.11384	0.0297666	0.39329	111
GO:0045732	positive regulation of protein catabolic process	biological_process	111/12078	152/18422	1.11384	0.0297666	0.39329	111
GO:0045807	positive regulation of endocytosis	biological_process	53/12078	69/18422	1.17157	0.0298152	0.393654	53
GO:0055123	digestive system development	biological_process	86/12078	116/18422	1.13079	0.0299601	0.394748	86
GO:0001843	neural tube closure	biological_process	65/12078	86/18422	1.15281	0.0299616	0.394748	65
GO:0030163	protein catabolic process	biological_process	391/12078	564/18422	1.0574	0.0302435	0.397311	391
GO:0048813	dendrite morphogenesis	biological_process	48/12078	62/18422	1.18084	0.0302798	0.397311	48
GO:0060998	regulation of dendritic spine development	biological_process	48/12078	62/18422	1.18084	0.0302798	0.397311	48
GO:0003206	cardiac chamber morphogenesis	biological_process	79/12078	106/18422	1.13674	0.0302839	0.397311	79
GO:0043523	regulation of neuron apoptotic process	biological_process	122/12078	168/18422	1.10762	0.0303466	0.397853	122
GO:0015749	monosaccharide transmembrane transport	biological_process	30/12078	37/18422	1.23669	0.0305119	0.3989	30
GO:1905268	negative regulation of chromatin organization	biological_process	30/12078	37/18422	1.23669	0.0305119	0.3989	30
GO:2000677	regulation of transcription regulatory region DNA binding	biological_process	30/12078	37/18422	1.23669	0.0305119	0.3989	30
GO:0051348	negative regulation of transferase activity	biological_process	157/12078	219/18422	1.09345	0.0308741	0.402788	157
GO:0022612	gland morphogenesis	biological_process	60/12078	79/18422	1.15842	0.0311286	0.405542	60
GO:0032272	negative regulation of protein polymerization	biological_process	60/12078	79/18422	1.15842	0.0311286	0.405542	60
GO:0000041	transition metal ion transport	biological_process	97/12078	132/18422	1.12083	0.0316651	0.411668	97
GO:0008589	regulation of smoothened signaling pathway	biological_process	55/12078	72/18422	1.16512	0.0321532	0.413993	55
GO:0062013	positive regulation of small molecule metabolic process	biological_process	55/12078	72/18422	1.16512	0.0321532	0.413993	55
GO:0015813	L-glutamate transmembrane transport	biological_process	12/12078	13/18422	1.40793	0.0323321	0.413993	12
GO:0022010	central nervous system myelination	biological_process	12/12078	13/18422	1.40793	0.0323321	0.413993	12
GO:0032239	regulation of nucleobase-containing compound transport	biological_process	12/12078	13/18422	1.40793	0.0323321	0.413993	12
GO:0032291	axon ensheathment in central nervous system	biological_process	12/12078	13/18422	1.40793	0.0323321	0.413993	12
GO:0032688	negative regulation of interferon-beta production	biological_process	12/12078	13/18422	1.40793	0.0323321	0.413993	12
GO:0034755	iron ion transmembrane transport	biological_process	12/12078	13/18422	1.40793	0.0323321	0.413993	12
GO:0036066	protein O-linked fucosylation	biological_process	12/12078	13/18422	1.40793	0.0323321	0.413993	12
GO:0046697	decidualization	biological_process	12/12078	13/18422	1.40793	0.0323321	0.413993	12
GO:0051764	actin crosslink formation	biological_process	12/12078	13/18422	1.40793	0.0323321	0.413993	12
GO:0061158	3'-UTR-mediated mRNA destabilization	biological_process	12/12078	13/18422	1.40793	0.0323321	0.413993	12
GO:0061437	renal system vasculature development	biological_process	12/12078	13/18422	1.40793	0.0323321	0.413993	12
GO:0061440	kidney vasculature development	biological_process	12/12078	13/18422	1.40793	0.0323321	0.413993	12
GO:0072148	epithelial cell fate commitment	biological_process	12/12078	13/18422	1.40793	0.0323321	0.413993	12
GO:2001039	negative regulation of cellular response to drug	biological_process	12/12078	13/18422	1.40793	0.0323321	0.413993	12
GO:2000027	regulation of animal organ morphogenesis	biological_process	117/12078	161/18422	1.10841	0.0324252	0.414197	117
GO:0001667	ameboidal-type cell migration	biological_process	90/12078	122/18422	1.12519	0.0324595	0.414197	90
GO:0034103	regulation of tissue remodeling	biological_process	35/12078	44/18422	1.21327	0.0325035	0.414197	35
GO:0050795	regulation of behavior	biological_process	35/12078	44/18422	1.21327	0.0325035	0.414197	35
GO:0086010	membrane depolarization during action potential	biological_process	27/12078	33/18422	1.24793	0.0326754	0.415985	27
GO:0090092	regulation of transmembrane receptor protein serine/threonine kinase signaling pathway	biological_process	139/12078	193/18422	1.0985	0.0326883	0.415985	139
GO:0097193	intrinsic apoptotic signaling pathway	biological_process	99/12078	135/18422	1.11852	0.0327655	0.416682	99
GO:0033993	response to lipid	biological_process	365/12078	526/18422	1.0584	0.0328792	0.417843	365
GO:0043279	response to alkaloid	biological_process	50/12078	65/18422	1.17327	0.0329519	0.418483	50
GO:0042752	regulation of circadian rhythm	biological_process	62/12078	82/18422	1.15324	0.0331629	0.420629	62
GO:0006950	response to stress	biological_process	1782/12078	2654/18422	1.02411	0.0332758	0.420629	1782
GO:0060191	regulation of lipase activity	biological_process	40/12078	51/18422	1.19628	0.0333412	0.420629	40
GO:0050866	negative regulation of cell activation	biological_process	92/12078	125/18422	1.12259	0.0336867	0.420629	92
GO:0070848	response to growth factor	biological_process	271/12078	387/18422	1.06807	0.0338516	0.420629	271
GO:0051091	positive regulation of DNA-binding transcription factor activity	biological_process	143/12078	199/18422	1.09604	0.0340553	0.420629	143
GO:0003418	growth plate cartilage chondrocyte differentiation	biological_process	8/12078	8/18422	1.52525	0.0341129	0.420629	8
GO:0006782	protoporphyrinogen IX biosynthetic process	biological_process	8/12078	8/18422	1.52525	0.0341129	0.420629	8
GO:0007016	cytoskeletal anchoring at plasma membrane	biological_process	8/12078	8/18422	1.52525	0.0341129	0.420629	8
GO:0016926	protein desumoylation	biological_process	8/12078	8/18422	1.52525	0.0341129	0.420629	8
GO:0021612	facial nerve structural organization	biological_process	8/12078	8/18422	1.52525	0.0341129	0.420629	8
GO:0034058	endosomal vesicle fusion	biological_process	8/12078	8/18422	1.52525	0.0341129	0.420629	8
GO:0034498	early endosome to Golgi transport	biological_process	8/12078	8/18422	1.52525	0.0341129	0.420629	8
GO:0043951	negative regulation of cAMP-mediated signaling	biological_process	8/12078	8/18422	1.52525	0.0341129	0.420629	8
GO:0043987	histone H3-S10 phosphorylation	biological_process	8/12078	8/18422	1.52525	0.0341129	0.420629	8
GO:0051938	L-glutamate import	biological_process	8/12078	8/18422	1.52525	0.0341129	0.420629	8
GO:0051953	negative regulation of amine transport	biological_process	8/12078	8/18422	1.52525	0.0341129	0.420629	8
GO:0060192	negative regulation of lipase activity	biological_process	8/12078	8/18422	1.52525	0.0341129	0.420629	8
GO:0060947	cardiac vascular smooth muscle cell differentiation	biological_process	8/12078	8/18422	1.52525	0.0341129	0.420629	8
GO:0072205	metanephric collecting duct development	biological_process	8/12078	8/18422	1.52525	0.0341129	0.420629	8
GO:0090308	regulation of methylation-dependent chromatin silencing	biological_process	8/12078	8/18422	1.52525	0.0341129	0.420629	8
GO:1900363	regulation of mRNA polyadenylation	biological_process	8/12078	8/18422	1.52525	0.0341129	0.420629	8
GO:1900409	positive regulation of cellular response to oxidative stress	biological_process	8/12078	8/18422	1.52525	0.0341129	0.420629	8
GO:1901098	positive regulation of autophagosome maturation	biological_process	8/12078	8/18422	1.52525	0.0341129	0.420629	8
GO:1902857	positive regulation of non-motile cilium assembly	biological_process	8/12078	8/18422	1.52525	0.0341129	0.420629	8
GO:1902866	regulation of retina development in camera-type eye	biological_process	8/12078	8/18422	1.52525	0.0341129	0.420629	8
GO:1903209	positive regulation of oxidative stress-induced cell death	biological_process	8/12078	8/18422	1.52525	0.0341129	0.420629	8
GO:1904294	positive regulation of ERAD pathway	biological_process	8/12078	8/18422	1.52525	0.0341129	0.420629	8
GO:1904338	regulation of dopaminergic neuron differentiation	biological_process	8/12078	8/18422	1.52525	0.0341129	0.420629	8
GO:1904396	regulation of neuromuscular junction development	biological_process	8/12078	8/18422	1.52525	0.0341129	0.420629	8
GO:0002697	regulation of immune effector process	biological_process	169/12078	237/18422	1.08763	0.0341871	0.421265	169
GO:0071375	cellular response to peptide hormone stimulus	biological_process	112/12078	154/18422	1.10927	0.0346495	0.425203	112
GO:0009395	phospholipid catabolic process	biological_process	24/12078	29/18422	1.26228	0.0346663	0.425203	24
GO:0048048	embryonic eye morphogenesis	biological_process	24/12078	29/18422	1.26228	0.0346663	0.425203	24
GO:0050766	positive regulation of phagocytosis	biological_process	24/12078	29/18422	1.26228	0.0346663	0.425203	24
GO:1905207	regulation of cardiocyte differentiation	biological_process	24/12078	29/18422	1.26228	0.0346663	0.425203	24
GO:1905953	negative regulation of lipid localization	biological_process	24/12078	29/18422	1.26228	0.0346663	0.425203	24
GO:0009746	response to hexose	biological_process	64/12078	85/18422	1.14843	0.0351687	0.43049	64
GO:0034284	response to monosaccharide	biological_process	64/12078	85/18422	1.14843	0.0351687	0.43049	64
GO:0045862	positive regulation of proteolysis	biological_process	173/12078	243/18422	1.08588	0.0352438	0.43049	173
GO:0000187	activation of MAPK activity	biological_process	71/12078	95/18422	1.13993	0.035305	0.43049	71
GO:0007269	neurotransmitter secretion	biological_process	71/12078	95/18422	1.13993	0.035305	0.43049	71
GO:0043244	regulation of protein complex disassembly	biological_process	71/12078	95/18422	1.13993	0.035305	0.43049	71
GO:0099643	signal release from synapse	biological_process	71/12078	95/18422	1.13993	0.035305	0.43049	71
GO:0044088	regulation of vacuole organization	biological_process	32/12078	40/18422	1.2202	0.0354121	0.430951	32
GO:0048747	muscle fiber development	biological_process	32/12078	40/18422	1.2202	0.0354121	0.430951	32
GO:0035050	embryonic heart tube development	biological_process	52/12078	68/18422	1.16637	0.0355852	0.432494	52
GO:1900024	regulation of substrate adhesion-dependent cell spreading	biological_process	52/12078	68/18422	1.16637	0.0355852	0.432494	52
GO:0055076	transition metal ion homeostasis	biological_process	105/12078	144/18422	1.11216	0.0359849	0.434351	105
GO:0048738	cardiac muscle tissue development	biological_process	96/12078	131/18422	1.11774	0.0360931	0.434351	96
GO:0001504	neurotransmitter uptake	biological_process	15/12078	17/18422	1.34581	0.0361977	0.434351	15
GO:0003299	muscle hypertrophy in response to stress	biological_process	15/12078	17/18422	1.34581	0.0361977	0.434351	15
GO:0014887	cardiac muscle adaptation	biological_process	15/12078	17/18422	1.34581	0.0361977	0.434351	15
GO:0014898	cardiac muscle hypertrophy in response to stress	biological_process	15/12078	17/18422	1.34581	0.0361977	0.434351	15
GO:0016578	histone deubiquitination	biological_process	15/12078	17/18422	1.34581	0.0361977	0.434351	15
GO:0019433	triglyceride catabolic process	biological_process	15/12078	17/18422	1.34581	0.0361977	0.434351	15
GO:0039535	regulation of RIG-I signaling pathway	biological_process	15/12078	17/18422	1.34581	0.0361977	0.434351	15
GO:0050951	sensory perception of temperature stimulus	biological_process	15/12078	17/18422	1.34581	0.0361977	0.434351	15
GO:0055083	monovalent inorganic anion homeostasis	biological_process	15/12078	17/18422	1.34581	0.0361977	0.434351	15
GO:0061162	establishment of monopolar cell polarity	biological_process	15/12078	17/18422	1.34581	0.0361977	0.434351	15
GO:1904886	beta-catenin destruction complex disassembly	biological_process	15/12078	17/18422	1.34581	0.0361977	0.434351	15
GO:2000104	negative regulation of DNA-dependent DNA replication	biological_process	15/12078	17/18422	1.34581	0.0361977	0.434351	15
GO:0043552	positive regulation of phosphatidylinositol 3-kinase activity	biological_process	21/12078	25/18422	1.28121	0.0362502	0.434351	21
GO:0051647	nucleus localization	biological_process	21/12078	25/18422	1.28121	0.0362502	0.434351	21
GO:0097366	response to bronchodilator	biological_process	21/12078	25/18422	1.28121	0.0362502	0.434351	21
GO:0031532	actin cytoskeleton reorganization	biological_process	47/12078	61/18422	1.17519	0.0364355	0.436011	47
GO:0035265	organ growth	biological_process	47/12078	61/18422	1.17519	0.0364355	0.436011	47
GO:0042692	muscle cell differentiation	biological_process	151/12078	211/18422	1.09153	0.0366946	0.437855	151
GO:0030218	erythrocyte differentiation	biological_process	42/12078	54/18422	1.18631	0.0368594	0.437855	42
GO:1901880	negative regulation of protein depolymerization	biological_process	42/12078	54/18422	1.18631	0.0368594	0.437855	42
GO:0007097	nuclear migration	biological_process	18/12078	21/18422	1.30736	0.0370135	0.437855	18
GO:0010039	response to iron ion	biological_process	18/12078	21/18422	1.30736	0.0370135	0.437855	18
GO:0015844	monoamine transport	biological_process	18/12078	21/18422	1.30736	0.0370135	0.437855	18
GO:0016577	histone demethylation	biological_process	18/12078	21/18422	1.30736	0.0370135	0.437855	18
GO:0036003	positive regulation of transcription from RNA polymerase II promoter in response to stress	biological_process	18/12078	21/18422	1.30736	0.0370135	0.437855	18
GO:0045622	regulation of T-helper cell differentiation	biological_process	18/12078	21/18422	1.30736	0.0370135	0.437855	18
GO:0070076	histone lysine demethylation	biological_process	18/12078	21/18422	1.30736	0.0370135	0.437855	18
GO:0072311	glomerular epithelial cell differentiation	biological_process	18/12078	21/18422	1.30736	0.0370135	0.437855	18
GO:0035637	multicellular organismal signaling	biological_process	73/12078	98/18422	1.13616	0.0370356	0.437855	73
GO:0006493	protein O-linked glycosylation	biological_process	66/12078	88/18422	1.14394	0.0371434	0.438852	66
GO:0050863	regulation of T cell activation	biological_process	168/12078	236/18422	1.08577	0.0377363	0.445293	168
GO:0046620	regulation of organ growth	biological_process	54/12078	71/18422	1.16005	0.0381735	0.44959	54
GO:0010821	regulation of mitochondrion organization	biological_process	120/12078	166/18422	1.10259	0.0383515	0.449804	120
GO:0015800	acidic amino acid transport	biological_process	29/12078	36/18422	1.22868	0.0384561	0.449804	29
GO:0030195	negative regulation of blood coagulation	biological_process	29/12078	36/18422	1.22868	0.0384561	0.449804	29
GO:0031018	endocrine pancreas development	biological_process	29/12078	36/18422	1.22868	0.0384561	0.449804	29
GO:0031100	animal organ regeneration	biological_process	29/12078	36/18422	1.22868	0.0384561	0.449804	29
GO:0031646	positive regulation of nervous system process	biological_process	29/12078	36/18422	1.22868	0.0384561	0.449804	29
GO:0061001	regulation of dendritic spine morphogenesis	biological_process	29/12078	36/18422	1.22868	0.0384561	0.449804	29
GO:1900047	negative regulation of hemostasis	biological_process	29/12078	36/18422	1.22868	0.0384561	0.449804	29
GO:1901342	regulation of vasculature development	biological_process	144/12078	201/18422	1.09272	0.0386129	0.451355	144
GO:0071559	response to transforming growth factor beta	biological_process	75/12078	101/18422	1.13261	0.0387384	0.452539	75
GO:1903052	positive regulation of proteolysis involved in cellular protein catabolic process	biological_process	61/12078	81/18422	1.14865	0.0389624	0.454673	61
GO:0045765	regulation of angiogenesis	biological_process	133/12078	185/18422	1.09653	0.0390618	0.455162	133
GO:0007254	JNK cascade	biological_process	49/12078	64/18422	1.16777	0.0394087	0.45836	49
GO:0010522	regulation of calcium ion transport into cytosol	biological_process	49/12078	64/18422	1.16777	0.0394087	0.45836	49
GO:0043433	negative regulation of DNA-binding transcription factor activity	biological_process	93/12078	127/18422	1.11692	0.0397701	0.461987	93
GO:0046488	phosphatidylinositol metabolic process	biological_process	93/12078	127/18422	1.11692	0.0397701	0.461987	93
GO:0007215	glutamate receptor signaling pathway	biological_process	34/12078	43/18422	1.20601	0.0402109	0.465947	34
GO:0016266	O-glycan processing	biological_process	34/12078	43/18422	1.20601	0.0402109	0.465947	34
GO:1903201	regulation of oxidative stress-induced cell death	biological_process	34/12078	43/18422	1.20601	0.0402109	0.465947	34
GO:1900006	positive regulation of dendrite development	biological_process	44/12078	57/18422	1.17739	0.0403067	0.466767	44
GO:0002495	antigen processing and presentation of peptide antigen via MHC class II	biological_process	39/12078	50/18422	1.1897	0.040673	0.470455	39
GO:1903037	regulation of leukocyte cell-cell adhesion	biological_process	150/12078	210/18422	1.08947	0.0406756	0.470455	150
GO:0030510	regulation of BMP signaling pathway	biological_process	56/12078	74/18422	1.15425	0.0407121	0.470585	56
GO:0019725	cellular homeostasis	biological_process	464/12078	675/18422	1.04847	0.0411472	0.475321	464
GO:0009190	cyclic nucleotide biosynthetic process	biological_process	26/12078	32/18422	1.23927	0.0415641	0.47777	26
GO:0031076	embryonic camera-type eye development	biological_process	26/12078	32/18422	1.23927	0.0415641	0.47777	26
GO:0046068	cGMP metabolic process	biological_process	26/12078	32/18422	1.23927	0.0415641	0.47777	26
GO:0048791	calcium ion-regulated exocytosis of neurotransmitter	biological_process	26/12078	32/18422	1.23927	0.0415641	0.47777	26
GO:0050732	negative regulation of peptidyl-tyrosine phosphorylation	biological_process	26/12078	32/18422	1.23927	0.0415641	0.47777	26
GO:0050853	B cell receptor signaling pathway	biological_process	26/12078	32/18422	1.23927	0.0415641	0.47777	26
GO:1903727	positive regulation of phospholipid metabolic process	biological_process	26/12078	32/18422	1.23927	0.0415641	0.47777	26
GO:0051603	proteolysis involved in cellular protein catabolic process	biological_process	345/12078	498/18422	1.05665	0.0417574	0.479401	345
GO:0030832	regulation of actin filament length	biological_process	128/12078	178/18422	1.09681	0.0418536	0.480209	128
GO:0009895	negative regulation of catabolic process	biological_process	154/12078	216/18422	1.08745	0.0420051	0.48106	154
GO:0000226	microtubule cytoskeleton organization	biological_process	291/12078	418/18422	1.06184	0.0424008	0.484996	291
GO:0002757	immune response-activating signal transduction	biological_process	156/12078	219/18422	1.08648	0.0426563	0.48762	156
GO:0016570	histone modification	biological_process	224/12078	319/18422	1.07102	0.0428171	0.488953	224
GO:0014066	regulation of phosphatidylinositol 3-kinase signaling	biological_process	72/12078	97/18422	1.13215	0.0428628	0.488953	72
GO:0071229	cellular response to acid chemical	biological_process	108/12078	149/18422	1.10555	0.042904	0.488953	108
GO:1902115	regulation of organelle assembly	biological_process	108/12078	149/18422	1.10555	0.042904	0.488953	108
GO:0051726	regulation of cell cycle	biological_process	623/12078	913/18422	1.04078	0.0431671	0.491651	623
GO:0045216	cell-cell junction organization	biological_process	65/12078	87/18422	1.13956	0.0432986	0.492016	65
GO:0060606	tube closure	biological_process	65/12078	87/18422	1.13956	0.0432986	0.492016	65
GO:0006887	exocytosis	biological_process	272/12078	390/18422	1.06377	0.0433045	0.492016	272
GO:0008202	steroid metabolic process	biological_process	132/12078	184/18422	1.0942	0.0435293	0.494268	132
GO:0051251	positive regulation of lymphocyte activation	biological_process	145/12078	203/18422	1.08947	0.0435915	0.494673	145
GO:0019217	regulation of fatty acid metabolic process	biological_process	46/12078	60/18422	1.16936	0.0436733	0.494682	46
GO:0055024	regulation of cardiac muscle tissue development	biological_process	46/12078	60/18422	1.16936	0.0436733	0.494682	46
GO:0006082	organic acid metabolic process	biological_process	536/12078	783/18422	1.04411	0.0436983	0.494682	536
GO:0006470	protein dephosphorylation	biological_process	90/12078	123/18422	1.11604	0.0438351	0.49593	90
GO:0072659	protein localization to plasma membrane	biological_process	121/12078	168/18422	1.09854	0.0439326	0.496375	121
GO:0010959	regulation of metal ion transport	biological_process	192/12078	272/18422	1.07665	0.0439543	0.496375	192
GO:0048483	autonomic nervous system development	biological_process	31/12078	39/18422	1.21238	0.0440795	0.497187	31
GO:0050819	negative regulation of coagulation	biological_process	31/12078	39/18422	1.21238	0.0440795	0.497187	31
GO:0006644	phospholipid metabolic process	biological_process	213/12078	303/18422	1.07221	0.044531	0.500159	213
GO:0035094	response to nicotine	biological_process	23/12078	28/18422	1.25289	0.0446022	0.500159	23
GO:0035115	embryonic forelimb morphogenesis	biological_process	23/12078	28/18422	1.25289	0.0446022	0.500159	23
GO:0036465	synaptic vesicle recycling	biological_process	23/12078	28/18422	1.25289	0.0446022	0.500159	23
GO:0043300	regulation of leukocyte degranulation	biological_process	23/12078	28/18422	1.25289	0.0446022	0.500159	23
GO:0090162	establishment of epithelial cell polarity	biological_process	23/12078	28/18422	1.25289	0.0446022	0.500159	23
GO:0006635	fatty acid beta-oxidation	biological_process	41/12078	53/18422	1.17991	0.0446111	0.500159	41
GO:1903169	regulation of calcium ion transmembrane transport	biological_process	74/12078	100/18422	1.12869	0.0446971	0.500296	74
GO:0051494	negative regulation of cytoskeleton organization	biological_process	101/12078	139/18422	1.10828	0.0447491	0.500296	101
GO:0031060	regulation of histone methylation	biological_process	36/12078	46/18422	1.19368	0.0448793	0.500296	36
GO:0043647	inositol phosphate metabolic process	biological_process	36/12078	46/18422	1.19368	0.0448793	0.500296	36
GO:0050764	regulation of phagocytosis	biological_process	36/12078	46/18422	1.19368	0.0448793	0.500296	36
GO:1900407	regulation of cellular response to oxidative stress	biological_process	36/12078	46/18422	1.19368	0.0448793	0.500296	36
GO:0051640	organelle localization	biological_process	315/12078	454/18422	1.05827	0.0450826	0.500296	315
GO:0030098	lymphocyte differentiation	biological_process	136/12078	190/18422	1.09176	0.0451553	0.500296	136
GO:0032465	regulation of cytokinesis	biological_process	53/12078	70/18422	1.15483	0.0451611	0.500296	53
GO:0051153	regulation of striated muscle cell differentiation	biological_process	53/12078	70/18422	1.15483	0.0451611	0.500296	53
GO:0048762	mesenchymal cell differentiation	biological_process	83/12078	113/18422	1.12032	0.0452554	0.500296	83
GO:0008277	regulation of G protein-coupled receptor signaling pathway	biological_process	67/12078	90/18422	1.13547	0.0453998	0.500296	67
GO:0051053	negative regulation of DNA metabolic process	biological_process	60/12078	80/18422	1.14394	0.0456279	0.500296	60
GO:0001710	mesodermal cell fate commitment	biological_process	11/12078	12/18422	1.39815	0.0460178	0.500296	11
GO:0001711	endodermal cell fate commitment	biological_process	11/12078	12/18422	1.39815	0.0460178	0.500296	11
GO:0001881	receptor recycling	biological_process	11/12078	12/18422	1.39815	0.0460178	0.500296	11
GO:0001975	response to amphetamine	biological_process	11/12078	12/18422	1.39815	0.0460178	0.500296	11
GO:0006171	cAMP biosynthetic process	biological_process	11/12078	12/18422	1.39815	0.0460178	0.500296	11
GO:0006907	pinocytosis	biological_process	11/12078	12/18422	1.39815	0.0460178	0.500296	11
GO:0035278	miRNA mediated inhibition of translation	biological_process	11/12078	12/18422	1.39815	0.0460178	0.500296	11
GO:0035330	regulation of hippo signaling	biological_process	11/12078	12/18422	1.39815	0.0460178	0.500296	11
GO:0035728	response to hepatocyte growth factor	biological_process	11/12078	12/18422	1.39815	0.0460178	0.500296	11
GO:0036119	response to platelet-derived growth factor	biological_process	11/12078	12/18422	1.39815	0.0460178	0.500296	11
GO:0036120	cellular response to platelet-derived growth factor stimulus	biological_process	11/12078	12/18422	1.39815	0.0460178	0.500296	11
GO:0039536	negative regulation of RIG-I signaling pathway	biological_process	11/12078	12/18422	1.39815	0.0460178	0.500296	11
GO:0040033	negative regulation of translation, ncRNA-mediated	biological_process	11/12078	12/18422	1.39815	0.0460178	0.500296	11
GO:0042107	cytokine metabolic process	biological_process	11/12078	12/18422	1.39815	0.0460178	0.500296	11
GO:0045198	establishment of epithelial cell apical/basal polarity	biological_process	11/12078	12/18422	1.39815	0.0460178	0.500296	11
GO:0045974	regulation of translation, ncRNA-mediated	biological_process	11/12078	12/18422	1.39815	0.0460178	0.500296	11
GO:0046475	glycerophospholipid catabolic process	biological_process	11/12078	12/18422	1.39815	0.0460178	0.500296	11
GO:0046501	protoporphyrinogen IX metabolic process	biological_process	11/12078	12/18422	1.39815	0.0460178	0.500296	11
GO:0046831	regulation of RNA export from nucleus	biological_process	11/12078	12/18422	1.39815	0.0460178	0.500296	11
GO:0050961	detection of temperature stimulus involved in sensory perception	biological_process	11/12078	12/18422	1.39815	0.0460178	0.500296	11
GO:0050965	detection of temperature stimulus involved in sensory perception of pain	biological_process	11/12078	12/18422	1.39815	0.0460178	0.500296	11
GO:0060292	long-term synaptic depression	biological_process	11/12078	12/18422	1.39815	0.0460178	0.500296	11
GO:0071281	cellular response to iron ion	biological_process	11/12078	12/18422	1.39815	0.0460178	0.500296	11
GO:0071577	zinc ion transmembrane transport	biological_process	11/12078	12/18422	1.39815	0.0460178	0.500296	11
GO:0089718	amino acid import across plasma membrane	biological_process	11/12078	12/18422	1.39815	0.0460178	0.500296	11
GO:0090178	regulation of establishment of planar polarity involved in neural tube closure	biological_process	11/12078	12/18422	1.39815	0.0460178	0.500296	11
GO:1901032	negative regulation of response to reactive oxygen species	biological_process	11/12078	12/18422	1.39815	0.0460178	0.500296	11
GO:1901096	regulation of autophagosome maturation	biological_process	11/12078	12/18422	1.39815	0.0460178	0.500296	11
GO:1903206	negative regulation of hydrogen peroxide-induced cell death	biological_process	11/12078	12/18422	1.39815	0.0460178	0.500296	11
GO:0002429	immune response-activating cell surface receptor signaling pathway	biological_process	114/12078	158/18422	1.1005	0.0460731	0.500605	114
GO:1901615	organic hydroxy compound metabolic process	biological_process	244/12078	349/18422	1.06637	0.0463333	0.50314	244
GO:0030111	regulation of Wnt signaling pathway	biological_process	185/12078	262/18422	1.07699	0.0465198	0.504787	185
GO:0008064	regulation of actin polymerization or depolymerization	biological_process	127/12078	177/18422	1.09439	0.0466697	0.505653	127
GO:0016049	cell growth	biological_process	85/12078	116/18422	1.11764	0.0468087	0.506239	85
GO:0044272	sulfur compound biosynthetic process	biological_process	85/12078	116/18422	1.11764	0.0468087	0.506239	85
GO:0001707	mesoderm formation	biological_process	48/12078	63/18422	1.1621	0.0469526	0.506914	48
GO:0090175	regulation of establishment of planar polarity	biological_process	48/12078	63/18422	1.1621	0.0469526	0.506914	48
GO:0002063	chondrocyte development	biological_process	20/12078	24/18422	1.27104	0.0473221	0.507089	20
GO:0006482	protein demethylation	biological_process	20/12078	24/18422	1.27104	0.0473221	0.507089	20
GO:0007274	neuromuscular synaptic transmission	biological_process	20/12078	24/18422	1.27104	0.0473221	0.507089	20
GO:0008214	protein dealkylation	biological_process	20/12078	24/18422	1.27104	0.0473221	0.507089	20
GO:0035116	embryonic hindlimb morphogenesis	biological_process	20/12078	24/18422	1.27104	0.0473221	0.507089	20
GO:0035329	hippo signaling	biological_process	20/12078	24/18422	1.27104	0.0473221	0.507089	20
GO:0045879	negative regulation of smoothened signaling pathway	biological_process	20/12078	24/18422	1.27104	0.0473221	0.507089	20
GO:0061462	protein localization to lysosome	biological_process	20/12078	24/18422	1.27104	0.0473221	0.507089	20
GO:0090103	cochlea morphogenesis	biological_process	20/12078	24/18422	1.27104	0.0473221	0.507089	20
GO:2000171	negative regulation of dendrite development	biological_process	20/12078	24/18422	1.27104	0.0473221	0.507089	20
GO:0045580	regulation of T cell differentiation	biological_process	69/12078	93/18422	1.13164	0.0474552	0.508222	69
GO:0032102	negative regulation of response to external stimulus	biological_process	157/12078	221/18422	1.08355	0.0477443	0.511025	157
GO:0010942	positive regulation of cell death	biological_process	345/12078	499/18422	1.05453	0.047936	0.512783	345
GO:0009749	response to glucose	biological_process	62/12078	83/18422	1.13935	0.0480012	0.512893	62
GO:0017015	regulation of transforming growth factor beta receptor signaling pathway	biological_process	62/12078	83/18422	1.13935	0.0480012	0.512893	62
GO:0006517	protein deglycosylation	biological_process	28/12078	35/18422	1.2202	0.0482205	0.513178	28
GO:0009583	detection of light stimulus	biological_process	28/12078	35/18422	1.2202	0.0482205	0.513178	28
GO:0034340	response to type I interferon	biological_process	28/12078	35/18422	1.2202	0.0482205	0.513178	28
GO:0035418	protein localization to synapse	biological_process	28/12078	35/18422	1.2202	0.0482205	0.513178	28
GO:0042220	response to cocaine	biological_process	28/12078	35/18422	1.2202	0.0482205	0.513178	28
GO:0050710	negative regulation of cytokine secretion	biological_process	28/12078	35/18422	1.2202	0.0482205	0.513178	28
GO:0060443	mammary gland morphogenesis	biological_process	28/12078	35/18422	1.2202	0.0482205	0.513178	28
GO:0034767	positive regulation of ion transmembrane transport	biological_process	78/12078	106/18422	1.12236	0.0482536	0.513238	78
GO:1903362	regulation of cellular protein catabolic process	biological_process	131/12078	183/18422	1.09185	0.0484218	0.513711	131
GO:0043401	steroid hormone mediated signaling pathway	biological_process	43/12078	56/18422	1.17118	0.0484357	0.513711	43
GO:0048864	stem cell development	biological_process	43/12078	56/18422	1.17118	0.0484357	0.513711	43
GO:0061035	regulation of cartilage development	biological_process	43/12078	56/18422	1.17118	0.0484357	0.513711	43
GO:1902882	regulation of response to oxidative stress	biological_process	43/12078	56/18422	1.17118	0.0484357	0.513711	43
GO:0043123	positive regulation of I-kappaB kinase/NF-kappaB signaling	biological_process	98/12078	135/18422	1.10722	0.049206	0.513999	98
GO:0002456	T cell mediated immunity	biological_process	17/12078	20/18422	1.29646	0.0492554	0.513999	17
GO:0032373	positive regulation of sterol transport	biological_process	17/12078	20/18422	1.29646	0.0492554	0.513999	17
GO:0032376	positive regulation of cholesterol transport	biological_process	17/12078	20/18422	1.29646	0.0492554	0.513999	17
GO:0034113	heterotypic cell-cell adhesion	biological_process	17/12078	20/18422	1.29646	0.0492554	0.513999	17
GO:0045540	regulation of cholesterol biosynthetic process	biological_process	17/12078	20/18422	1.29646	0.0492554	0.513999	17
GO:0048730	epidermis morphogenesis	biological_process	17/12078	20/18422	1.29646	0.0492554	0.513999	17
GO:0051043	regulation of membrane protein ectodomain proteolysis	biological_process	17/12078	20/18422	1.29646	0.0492554	0.513999	17
GO:0060997	dendritic spine morphogenesis	biological_process	17/12078	20/18422	1.29646	0.0492554	0.513999	17
GO:0061318	renal filtration cell differentiation	biological_process	17/12078	20/18422	1.29646	0.0492554	0.513999	17
GO:0072112	glomerular visceral epithelial cell differentiation	biological_process	17/12078	20/18422	1.29646	0.0492554	0.513999	17
GO:0086019	cell-cell signaling involved in cardiac conduction	biological_process	17/12078	20/18422	1.29646	0.0492554	0.513999	17
GO:0106118	regulation of sterol biosynthetic process	biological_process	17/12078	20/18422	1.29646	0.0492554	0.513999	17
GO:1903204	negative regulation of oxidative stress-induced neuron death	biological_process	17/12078	20/18422	1.29646	0.0492554	0.513999	17
GO:0030104	water homeostasis	biological_process	38/12078	49/18422	1.18285	0.0493995	0.513999	38
GO:0048168	regulation of neuronal synaptic plasticity	biological_process	38/12078	49/18422	1.18285	0.0493995	0.513999	38
GO:0050810	regulation of steroid biosynthetic process	biological_process	38/12078	49/18422	1.18285	0.0493995	0.513999	38
GO:0098760	response to interleukin-7	biological_process	38/12078	49/18422	1.18285	0.0493995	0.513999	38
GO:0098761	cellular response to interleukin-7	biological_process	38/12078	49/18422	1.18285	0.0493995	0.513999	38
GO:0035967	cellular response to topologically incorrect protein	biological_process	71/12078	96/18422	1.12805	0.0494642	0.513999	71
GO:0001580	detection of chemical stimulus involved in sensory perception of bitter taste	biological_process	14/12078	16/18422	1.3346	0.0494779	0.513999	14
GO:0006206	pyrimidine nucleobase metabolic process	biological_process	14/12078	16/18422	1.3346	0.0494779	0.513999	14
GO:0006828	manganese ion transport	biological_process	14/12078	16/18422	1.3346	0.0494779	0.513999	14
GO:0030859	polarized epithelial cell differentiation	biological_process	14/12078	16/18422	1.3346	0.0494779	0.513999	14
GO:0035308	negative regulation of protein dephosphorylation	biological_process	14/12078	16/18422	1.3346	0.0494779	0.513999	14
GO:0051937	catecholamine transport	biological_process	14/12078	16/18422	1.3346	0.0494779	0.513999	14
GO:0090312	positive regulation of protein deacetylation	biological_process	14/12078	16/18422	1.3346	0.0494779	0.513999	14
GO:1903792	negative regulation of anion transport	biological_process	14/12078	16/18422	1.3346	0.0494779	0.513999	14
GO:0045103	intermediate filament-based process	biological_process	33/12078	42/18422	1.19841	0.0495099	0.513999	33
GO:0048546	digestive tract morphogenesis	biological_process	33/12078	42/18422	1.19841	0.0495099	0.513999	33
GO:0002695	negative regulation of leukocyte activation	biological_process	80/12078	109/18422	1.11945	0.0499755	0.517968	80
GO:0048754	branching morphogenesis of an epithelial tube	biological_process	80/12078	109/18422	1.11945	0.0499755	0.517968	80
TermID	Description	Category	GeneRatio	BgRatio	Enrich_factor	P_value	P_adjust	GeneCount
GO:0044459	plasma membrane part	cellular_component	1707/12078	2321/18422	1.12176	7.18017e-19	1.62502e-15	1707
GO:0031226	intrinsic component of plasma membrane	cellular_component	987/12078	1339/18422	1.12429	1.82569e-11	8.78004e-09	987
GO:0042995	cell projection	cellular_component	1328/12078	1838/18422	1.10203	6.24221e-11	2.37662e-08	1328
GO:0005887	integral component of plasma membrane	cellular_component	944/12078	1283/18422	1.12224	1.03156e-10	3.56384e-08	944
GO:0120025	plasma membrane bounded cell projection	cellular_component	1266/12078	1760/18422	1.09714	1.1697e-09	2.94891e-07	1266
GO:0062023	collagen-containing extracellular matrix	cellular_component	105/12078	118/18422	1.35722	4.41693e-09	9.69439e-07	105
GO:0043005	neuron projection	cellular_component	747/12078	1014/18422	1.12363	7.28815e-09	1.41179e-06	747
GO:0098590	plasma membrane region	cellular_component	731/12078	991/18422	1.12509	7.34048e-09	1.41179e-06	731
GO:0097458	neuron part	cellular_component	947/12078	1305/18422	1.10683	1.16227e-08	2.16832e-06	947
GO:0044463	cell projection part	cellular_component	881/12078	1210/18422	1.11054	1.40545e-08	2.54565e-06	881
GO:0120038	plasma membrane bounded cell projection part	cellular_component	881/12078	1210/18422	1.11054	1.40545e-08	2.54565e-06	881
GO:0036477	somatodendritic compartment	cellular_component	442/12078	582/18422	1.15835	2.37598e-08	4.06662e-06	442
GO:0071944	cell periphery	cellular_component	3542/12078	5164/18422	1.04617	3.26776e-08	5.34767e-06	3542
GO:0030425	dendrite	cellular_component	336/12078	435/18422	1.17813	5.67465e-08	8.08139e-06	336
GO:0097447	dendritic tree	cellular_component	336/12078	435/18422	1.17813	5.67465e-08	8.08139e-06	336
GO:0005856	cytoskeleton	cellular_component	1430/12078	2026/18422	1.07656	1.99348e-07	2.3244e-05	1430
GO:0005886	plasma membrane	cellular_component	3466/12078	5066/18422	1.04353	2.52377e-07	2.87277e-05	3466
GO:0045202	synapse	cellular_component	595/12078	811/18422	1.11902	6.58747e-07	6.67912e-05	595
GO:0005604	basement membrane	cellular_component	83/12078	95/18422	1.33259	1.18795e-06	0.000113653	83
GO:0015629	actin cytoskeleton	cellular_component	342/12078	454/18422	1.14898	3.44726e-06	0.000299126	342
GO:0005654	nucleoplasm	cellular_component	1861/12078	2683/18422	1.05796	3.51782e-06	0.000302397	1861
GO:0030054	cell junction	cellular_component	891/12078	1249/18422	1.08807	3.81161e-06	0.000320312	891
GO:0005794	Golgi apparatus	cellular_component	910/12078	1286/18422	1.0793	2.20703e-05	0.00150271	910
GO:0030424	axon	cellular_component	359/12078	484/18422	1.13133	2.27157e-05	0.00153545	359
GO:0045121	membrane raft	cellular_component	206/12078	268/18422	1.1724	3.52034e-05	0.0022113	206
GO:0098857	membrane microdomain	cellular_component	206/12078	268/18422	1.1724	3.52034e-05	0.0022113	206
GO:0012505	endomembrane system	cellular_component	2530/12078	3703/18422	1.0421	3.84815e-05	0.00235381	2530
GO:0098797	plasma membrane protein complex	cellular_component	343/12078	463/18422	1.12994	4.07886e-05	0.00248677	343
GO:0044430	cytoskeletal part	cellular_component	1052/12078	1499/18422	1.07042	4.14862e-05	0.00251601	1052
GO:0044456	synapse part	cellular_component	487/12078	671/18422	1.107	4.44249e-05	0.00264789	487
GO:0150034	distal axon	cellular_component	172/12078	221/18422	1.18707	4.49169e-05	0.00266868	172
GO:0043025	neuronal cell body	cellular_component	260/12078	345/18422	1.14947	4.69207e-05	0.00275359	260
GO:0043235	receptor complex	cellular_component	209/12078	273/18422	1.16768	4.85338e-05	0.00282071	209
GO:0045177	apical part of cell	cellular_component	245/12078	324/18422	1.15335	5.17367e-05	0.00297901	245
GO:0098794	postsynapse	cellular_component	304/12078	408/18422	1.13646	5.2461e-05	0.00301142	304
GO:0044420	extracellular matrix component	cellular_component	37/12078	40/18422	1.41086	7.63495e-05	0.004217	37
GO:0031252	cell leading edge	cellular_component	282/12078	378/18422	1.13789	8.27527e-05	0.00449782	282
GO:0030427	site of polarized growth	cellular_component	122/12078	153/18422	1.21621	8.29358e-05	0.00449782	122
GO:0099080	supramolecular complex	cellular_component	555/12078	774/18422	1.09369	0.000113327	0.00597239	555
GO:0099081	supramolecular polymer	cellular_component	554/12078	773/18422	1.09313	0.000125049	0.00653479	554
GO:0016324	apical plasma membrane	cellular_component	204/12078	269/18422	1.1567	0.000158884	0.00801117	204
GO:0099568	cytoplasmic region	cellular_component	316/12078	429/18422	1.1235	0.000165847	0.00825075	316
GO:0099512	supramolecular fiber	cellular_component	551/12078	770/18422	1.09145	0.000167499	0.00828876	551
GO:0098589	membrane region	cellular_component	213/12078	282/18422	1.15205	0.000174458	0.00861029	213
GO:0005911	cell-cell junction	cellular_component	297/12078	402/18422	1.12687	0.000180722	0.00884921	297
GO:0033267	axon part	cellular_component	231/12078	308/18422	1.14394	0.000202718	0.00967242	231
GO:0016020	membrane	cellular_component	5969/12078	8931/18422	1.0194	0.000224842	0.0105129	5969
GO:0030426	growth cone	cellular_component	117/12078	148/18422	1.20577	0.000226655	0.0105448	117
GO:0043197	dendritic spine	cellular_component	87/12078	107/18422	1.24016	0.000243497	0.0112386	87
GO:0030131	clathrin adaptor complex	cellular_component	25/12078	26/18422	1.46659	0.000248861	0.0114072	25
GO:0005938	cell cortex	cellular_component	195/12078	258/18422	1.15281	0.000302336	0.0136241	195
GO:0030027	lamellipodium	cellular_component	138/12078	178/18422	1.1825	0.000335743	0.014738	138
GO:0044297	cell body	cellular_component	292/12078	397/18422	1.12185	0.000340329	0.0149042	292
GO:0044309	neuron spine	cellular_component	88/12078	109/18422	1.2314	0.000360191	0.0156637	88
GO:0097708	intracellular vesicle	cellular_component	1220/12078	1763/18422	1.05548	0.00036485	0.0157927	1220
GO:0001726	ruffle	cellular_component	140/12078	181/18422	1.17975	0.000367519	0.0158347	140
GO:0005581	collagen trimer	cellular_component	68/12078	82/18422	1.26484	0.000382164	0.0162777	68
GO:0031410	cytoplasmic vesicle	cellular_component	1218/12078	1761/18422	1.05494	0.000414393	0.017412	1218
GO:0030863	cortical cytoskeleton	cellular_component	78/12078	96/18422	1.23927	0.000527643	0.021353	78
GO:0098588	bounding membrane of organelle	cellular_component	1152/12078	1665/18422	1.05531	0.000553716	0.0222632	1152
GO:0098805	whole membrane	cellular_component	927/12078	1332/18422	1.06149	0.00065965	0.0257996	927
GO:0097060	synaptic membrane	cellular_component	236/12078	319/18422	1.1284	0.000696863	0.0270078	236
GO:0044448	cell cortex part	cellular_component	111/12078	142/18422	1.19227	0.000717282	0.027648	111
GO:0098802	plasma membrane receptor complex	cellular_component	111/12078	142/18422	1.19227	0.000717282	0.027648	111
GO:0031012	extracellular matrix	cellular_component	367/12078	509/18422	1.09974	0.000823043	0.0308327	367
GO:0005788	endoplasmic reticulum lumen	cellular_component	121/12078	157/18422	1.17551	0.00114495	0.0401508	121
GO:0030118	clathrin coat	cellular_component	36/12078	41/18422	1.33925	0.0011881	0.0409708	36
GO:0099513	polymeric cytoskeletal fiber	cellular_component	416/12078	583/18422	1.08834	0.001421	0.047282	416
GO:0034703	cation channel complex	cellular_component	158/12078	210/18422	1.14757	0.00152571	0.0500239	158
GO:0044431	Golgi apparatus part	cellular_component	545/12078	773/18422	1.07537	0.00160849	0.0518273	545
GO:1902495	transmembrane transporter complex	cellular_component	226/12078	308/18422	1.11918	0.00185778	0.0581524	226
GO:0098984	neuron to neuron synapse	cellular_component	161/12078	215/18422	1.14217	0.00196495	0.0606839	161
GO:0044853	plasma membrane raft	cellular_component	61/12078	75/18422	1.24054	0.00200708	0.0616597	61
GO:0098858	actin-based cell projection	cellular_component	137/12078	181/18422	1.15447	0.0020399	0.0623876	137
GO:0005871	kinesin complex	cellular_component	52/12078	63/18422	1.25894	0.00228608	0.0680208	52
GO:0000151	ubiquitin ligase complex	cellular_component	201/12078	273/18422	1.12299	0.00246206	0.0719385	201
GO:0032279	asymmetric synapse	cellular_component	159/12078	213/18422	1.13857	0.002615	0.0749391	159
GO:0098644	complex of collagen trimers	cellular_component	14/12078	14/18422	1.52525	0.00270451	0.0766797	14
GO:0030119	AP-type membrane coat adaptor complex	cellular_component	33/12078	38/18422	1.32456	0.00290371	0.0806125	33
GO:0005901	caveola	cellular_component	51/12078	62/18422	1.25464	0.00291074	0.0806876	51
GO:0034702	ion channel complex	cellular_component	211/12078	288/18422	1.11746	0.00291669	0.0807325	211
GO:0098552	side of membrane	cellular_component	235/12078	323/18422	1.1097	0.00317944	0.0868457	235
GO:0044425	membrane part	cellular_component	4388/12078	6565/18422	1.01947	0.00346788	0.0937633	4388
GO:0030864	cortical actin cytoskeleton	cellular_component	61/12078	76/18422	1.22422	0.00368071	0.0967147	61
GO:0045211	postsynaptic membrane	cellular_component	186/12078	253/18422	1.12133	0.00388841	0.100753	186
GO:0099572	postsynaptic specialization	cellular_component	156/12078	210/18422	1.13304	0.00397158	0.102623	156
GO:0042383	sarcolemma	cellular_component	89/12078	115/18422	1.18041	0.00397907	0.102674	89
GO:0098791	Golgi subcompartment	cellular_component	205/12078	281/18422	1.11273	0.00457922	0.114059	205
GO:0030136	clathrin-coated vesicle	cellular_component	93/12078	121/18422	1.1723	0.00471487	0.116969	93
GO:0048471	perinuclear region of cytoplasm	cellular_component	409/12078	579/18422	1.07742	0.00473547	0.117324	409
GO:0002102	podosome	cellular_component	28/12078	32/18422	1.3346	0.00487621	0.119856	28
GO:0032432	actin filament bundle	cellular_component	43/12078	52/18422	1.26127	0.00509557	0.124026	43
GO:0005667	transcription factor complex	cellular_component	213/12078	293/18422	1.1088	0.00511735	0.124309	213
GO:0005622	intracellular	cellular_component	9202/12078	13926/18422	1.00785	0.00515242	0.124836	9202
GO:0014069	postsynaptic density	cellular_component	154/12078	208/18422	1.12927	0.0052092	0.124892	154
GO:0045178	basal part of cell	cellular_component	37/12078	44/18422	1.2826	0.00532881	0.126642	37
GO:0031463	Cul3-RING ubiquitin ligase complex	cellular_component	56/12078	70/18422	1.2202	0.00606651	0.140592	56
GO:0031984	organelle subcompartment	cellular_component	218/12078	301/18422	1.10467	0.00618331	0.142767	218
GO:0038201	TOR complex	cellular_component	12/12078	12/18422	1.52525	0.00629624	0.143422	12
GO:0035097	histone methyltransferase complex	cellular_component	53/12078	66/18422	1.22482	0.00650986	0.147927	53
GO:0005768	endosome	cellular_component	541/12078	776/18422	1.06335	0.0067639	0.151485	541
GO:0005769	early endosome	cellular_component	228/12078	316/18422	1.1005	0.0069349	0.153045	228
GO:1990351	transporter complex	cellular_component	228/12078	316/18422	1.1005	0.0069349	0.153045	228
GO:0005802	trans-Golgi network	cellular_component	131/12078	176/18422	1.13527	0.0070268	0.153355	131
GO:0044665	MLL1/2 complex	cellular_component	23/12078	26/18422	1.34926	0.00819453	0.171387	23
GO:0071339	MLL1 complex	cellular_component	23/12078	26/18422	1.34926	0.00819453	0.171387	23
GO:0031901	early endosome membrane	cellular_component	87/12078	114/18422	1.16401	0.00861783	0.178837	87
GO:0030139	endocytic vesicle	cellular_component	122/12078	164/18422	1.13464	0.00934868	0.188347	122
GO:1990752	microtubule end	cellular_component	19/12078	21/18422	1.37999	0.00984769	0.19503	19
GO:0043296	apical junction complex	cellular_component	93/12078	123/18422	1.15324	0.0105092	0.203596	93
GO:0005874	microtubule	cellular_component	293/12078	413/18422	1.08208	0.0107263	0.206938	293
GO:0005875	microtubule associated complex	cellular_component	114/12078	153/18422	1.13646	0.0108162	0.207121	114
GO:0044453	nuclear membrane part	cellular_component	15/12078	16/18422	1.42992	0.0109356	0.207121	15
GO:0005902	microvillus	cellular_component	53/12078	67/18422	1.20654	0.0113673	0.210594	53
GO:0042641	actomyosin	cellular_component	45/12078	56/18422	1.22565	0.0116111	0.214048	45
GO:0016323	basolateral plasma membrane	cellular_component	143/12078	195/18422	1.11852	0.0120355	0.218844	143
GO:0044433	cytoplasmic vesicle part	cellular_component	664/12078	963/18422	1.05168	0.0121541	0.220785	664
GO:0031253	cell projection membrane	cellular_component	196/12078	272/18422	1.09908	0.0126691	0.228142	196
GO:0031461	cullin-RING ubiquitin ligase complex	cellular_component	131/12078	178/18422	1.12252	0.0130861	0.234295	131
GO:0044444	cytoplasmic part	cellular_component	5619/12078	8461/18422	1.01293	0.0133249	0.238113	5619
GO:0098862	cluster of actin-based cell projections	cellular_component	105/12078	141/18422	1.13583	0.0144456	0.251082	105
GO:0015630	microtubule cytoskeleton	cellular_component	781/12078	1139/18422	1.04585	0.0144905	0.251082	781
GO:0005583	fibrillar collagen trimer	cellular_component	10/12078	10/18422	1.52525	0.0146563	0.251082	10
GO:0031932	TORC2 complex	cellular_component	10/12078	10/18422	1.52525	0.0146563	0.251082	10
GO:0098643	banded collagen fibril	cellular_component	10/12078	10/18422	1.52525	0.0146563	0.251082	10
GO:0043198	dendritic shaft	cellular_component	30/12078	36/18422	1.27104	0.0154071	0.25926	30
GO:0005639	integral component of nuclear inner membrane	cellular_component	14/12078	15/18422	1.42357	0.0157534	0.25926	14
GO:0031229	intrinsic component of nuclear inner membrane	cellular_component	14/12078	15/18422	1.42357	0.0157534	0.25926	14
GO:0032039	integrator complex	cellular_component	14/12078	15/18422	1.42357	0.0157534	0.25926	14
GO:0008305	integrin complex	cellular_component	24/12078	28/18422	1.30736	0.0157709	0.25926	24
GO:0051233	spindle midzone	cellular_component	24/12078	28/18422	1.30736	0.0157709	0.25926	24
GO:0098636	protein complex involved in cell adhesion	cellular_component	24/12078	28/18422	1.30736	0.0157709	0.25926	24
GO:0005811	lipid droplet	cellular_component	46/12078	58/18422	1.20968	0.0164986	0.27027	46
GO:0005829	cytosol	cellular_component	2618/12078	3907/18422	1.02204	0.0167255	0.272754	2618
GO:0000792	heterochromatin	cellular_component	51/12078	65/18422	1.19674	0.0169985	0.276481	51
GO:0005884	actin filament	cellular_component	61/12078	79/18422	1.17773	0.0171123	0.277848	61
GO:0009897	external side of plasma membrane	cellular_component	110/12078	149/18422	1.12603	0.0188318	0.298771	110
GO:0098878	neurotransmitter receptor complex	cellular_component	40/12078	50/18422	1.2202	0.0194034	0.302973	40
GO:0009986	cell surface	cellular_component	364/12078	521/18422	1.06563	0.0194068	0.302973	364
GO:0005801	cis-Golgi network	cellular_component	29/12078	35/18422	1.26378	0.0198888	0.309463	29
GO:0031616	spindle pole centrosome	cellular_component	9/12078	9/18422	1.52525	0.0223603	0.323952	9
GO:0033270	paranode region of axon	cellular_component	9/12078	9/18422	1.52525	0.0223603	0.323952	9
GO:0070603	SWI/SNF superfamily-type complex	cellular_component	57/12078	74/18422	1.17486	0.022578	0.323952	57
GO:1904949	ATPase complex	cellular_component	57/12078	74/18422	1.17486	0.022578	0.323952	57
GO:0098793	presynapse	cellular_component	237/12078	335/18422	1.07906	0.0241091	0.3392	237
GO:0016459	myosin complex	cellular_component	59/12078	77/18422	1.1687	0.024441	0.343352	59
GO:0012506	vesicle membrane	cellular_component	391/12078	563/18422	1.05928	0.0262485	0.360951	391
GO:0032982	myosin filament	cellular_component	16/12078	18/18422	1.35578	0.0263322	0.360951	16
GO:0035371	microtubule plus-end	cellular_component	16/12078	18/18422	1.35578	0.0263322	0.360951	16
GO:0030666	endocytic vesicle membrane	cellular_component	68/12078	90/18422	1.15241	0.0270858	0.369381	68
GO:0042611	MHC protein complex	cellular_component	22/12078	26/18422	1.2906	0.0276111	0.370336	22
GO:0000139	Golgi membrane	cellular_component	415/12078	599/18422	1.05673	0.0276819	0.370469	415
GO:0031526	brush border membrane	cellular_component	33/12078	41/18422	1.22764	0.0283117	0.376887	33
GO:0008328	ionotropic glutamate receptor complex	cellular_component	38/12078	48/18422	1.20749	0.0297661	0.39329	38
GO:0010008	endosome membrane	cellular_component	264/12078	376/18422	1.07092	0.0302352	0.397311	264
GO:0009898	cytoplasmic side of plasma membrane	cellular_component	113/12078	155/18422	1.11196	0.0306625	0.400588	113
GO:0043194	axon initial segment	cellular_component	12/12078	13/18422	1.40793	0.0323321	0.413993	12
GO:0001725	stress fiber	cellular_component	35/12078	44/18422	1.21327	0.0325035	0.414197	35
GO:0097517	contractile actin filament bundle	cellular_component	35/12078	44/18422	1.21327	0.0325035	0.414197	35
GO:0034708	methyltransferase complex	cellular_component	69/12078	92/18422	1.14394	0.0335479	0.420629	69
GO:0005915	zonula adherens	cellular_component	8/12078	8/18422	1.52525	0.0341129	0.420629	8
GO:0030991	intraciliary transport particle A	cellular_component	8/12078	8/18422	1.52525	0.0341129	0.420629	8
GO:0061702	inflammasome complex	cellular_component	8/12078	8/18422	1.52525	0.0341129	0.420629	8
GO:1990909	Wnt signalosome	cellular_component	8/12078	8/18422	1.52525	0.0341129	0.420629	8
GO:0030175	filopodium	cellular_component	71/12078	95/18422	1.13993	0.035305	0.43049	71
GO:0005847	mRNA cleavage and polyadenylation specificity factor complex	cellular_component	15/12078	17/18422	1.34581	0.0361977	0.434351	15
GO:0031594	neuromuscular junction	cellular_component	42/12078	54/18422	1.18631	0.0368594	0.437855	42
GO:0001891	phagocytic cup	cellular_component	18/12078	21/18422	1.30736	0.0370135	0.437855	18
GO:0044298	cell body membrane	cellular_component	18/12078	21/18422	1.30736	0.0370135	0.437855	18
GO:0044440	endosomal part	cellular_component	276/12078	395/18422	1.06575	0.0374098	0.44172	276
GO:0070160	tight junction	cellular_component	82/12078	111/18422	1.12676	0.0380622	0.448572	82
GO:0044432	endoplasmic reticulum part	cellular_component	746/12078	1096/18422	1.03817	0.0381968	0.44959	746
GO:0044424	intracellular part	cellular_component	9001/12078	13652/18422	1.00563	0.0389699	0.454673	9001
GO:0005903	brush border	cellular_component	68/12078	91/18422	1.13975	0.039085	0.455162	68
GO:0044464	cell part	cellular_component	10651/12078	16189/18422	1.00349	0.0416905	0.478928	10651
GO:0005765	lysosomal membrane	cellular_component	201/12078	285/18422	1.0757	0.0419815	0.48106	201
GO:0098852	lytic vacuole membrane	cellular_component	201/12078	285/18422	1.0757	0.0419815	0.48106	201
GO:0043204	perikaryon	cellular_component	72/12078	97/18422	1.13215	0.0428628	0.488953	72
GO:0005905	clathrin-coated pit	cellular_component	46/12078	60/18422	1.16936	0.0436733	0.494682	46
GO:0044451	nucleoplasm part	cellular_component	699/12078	1027/18422	1.03812	0.0438921	0.496273	699
GO:0030659	cytoplasmic vesicle membrane	cellular_component	377/12078	546/18422	1.05315	0.0442896	0.499255	377
GO:0034704	calcium channel complex	cellular_component	36/12078	46/18422	1.19368	0.0448793	0.500296	36
GO:0017146	NMDA selective glutamate receptor complex	cellular_component	11/12078	12/18422	1.39815	0.0460178	0.500296	11
GO:0036056	filtration diaphragm	cellular_component	11/12078	12/18422	1.39815	0.0460178	0.500296	11
GO:0036057	slit diaphragm	cellular_component	11/12078	12/18422	1.39815	0.0460178	0.500296	11
GO:0016021	integral component of membrane	cellular_component	3550/12078	5339/18422	1.01417	0.0465392	0.504787	3550
GO:0005815	microtubule organizing center	cellular_component	472/12078	688/18422	1.04639	0.0466732	0.505653	472
GO:0005623	cell	cellular_component	10668/12078	16217/18422	1.00335	0.0468373	0.506255	10668
GO:0008074	guanylate cyclase complex, soluble	cellular_component	17/12078	20/18422	1.29646	0.0492554	0.513999	17
GO:0032809	neuronal cell body membrane	cellular_component	17/12078	20/18422	1.29646	0.0492554	0.513999	17
GO:0005892	acetylcholine-gated channel complex	cellular_component	14/12078	16/18422	1.3346	0.0494779	0.513999	14
GO:0071565	nBAF complex	cellular_component	14/12078	16/18422	1.3346	0.0494779	0.513999	14
GO:0097431	mitotic spindle pole	cellular_component	14/12078	16/18422	1.3346	0.0494779	0.513999	14
GO:0005923	bicellular tight junction	cellular_component	80/12078	109/18422	1.11945	0.0499755	0.517968	80
TermID	Description	Category	GeneRatio	BgRatio	Enrich_factor	P_value	P_adjust	GeneCount
GO:0005488	binding	molecular_function	8084/12078	12000/18422	1.02751	0	0	8084
GO:0043167	ion binding	molecular_function	4243/12078	6041/18422	1.07129	3.70476e-21	1.15193e-17	4243
GO:0032559	adenyl ribonucleotide binding	molecular_function	1218/12078	1641/18422	1.13209	1.72486e-15	2.01119e-12	1218
GO:0030554	adenyl nucleotide binding	molecular_function	1223/12078	1649/18422	1.13122	2.23124e-15	2.44859e-12	1223
GO:0005524	ATP binding	molecular_function	1186/12078	1598/18422	1.13201	4.43559e-15	4.13752e-12	1186
GO:0008144	drug binding	molecular_function	1314/12078	1796/18422	1.11591	2.29174e-13	1.94339e-10	1314
GO:0043168	anion binding	molecular_function	1976/12078	2772/18422	1.08727	1.97488e-12	1.36457e-09	1976
GO:0043169	cation binding	molecular_function	2844/12078	4058/18422	1.06895	2.58525e-12	1.72251e-09	2844
GO:0051020	GTPase binding	molecular_function	426/12078	540/18422	1.20325	4.3756e-12	2.81487e-09	426
GO:0003700	DNA-binding transcription factor activity	molecular_function	763/12078	1014/18422	1.1477	4.86826e-12	2.92975e-09	763
GO:0046872	metal ion binding	molecular_function	2792/12078	3986/18422	1.06837	6.74248e-12	3.81175e-09	2792
GO:0031267	small GTPase binding	molecular_function	356/12078	446/18422	1.21747	1.59111e-11	8.02263e-09	356
GO:0043565	sequence-specific DNA binding	molecular_function	732/12078	974/18422	1.14629	2.05896e-11	9.36875e-09	732
GO:0140110	transcription regulator activity	molecular_function	1012/12078	1376/18422	1.12177	2.41245e-11	1.04667e-08	1012
GO:0044212	transcription regulatory region DNA binding	molecular_function	588/12078	772/18422	1.16172	4.70643e-11	1.86815e-08	588
GO:0000981	DNA-binding transcription factor activity, RNA polymerase II-specific	molecular_function	486/12078	629/18422	1.17849	5.71041e-11	2.21945e-08	486
GO:0001067	regulatory region nucleic acid binding	molecular_function	588/12078	773/18422	1.16022	6.91531e-11	2.52965e-08	588
GO:0016773	phosphotransferase activity, alcohol group as acceptor	molecular_function	568/12078	745/18422	1.16288	7.61574e-11	2.73229e-08	568
GO:0017016	Ras GTPase binding	molecular_function	344/12078	433/18422	1.21175	1.05278e-10	3.57102e-08	344
GO:0016301	kinase activity	molecular_function	623/12078	824/18422	1.15319	1.18318e-10	3.87254e-08	623
GO:0140096	catalytic activity, acting on a protein	molecular_function	1544/12078	2165/18422	1.08776	7.29247e-10	1.97171e-07	1544
GO:0004672	protein kinase activity	molecular_function	483/12078	632/18422	1.16566	1.13612e-09	2.90348e-07	483
GO:0005085	guanyl-nucleotide exchange factor activity	molecular_function	219/12078	267/18422	1.25105	1.49503e-09	3.66992e-07	219
GO:0017048	Rho GTPase binding	molecular_function	132/12078	152/18422	1.32456	2.04244e-09	4.8851e-07	132
GO:0097367	carbohydrate derivative binding	molecular_function	1606/12078	2266/18422	1.081	5.25102e-09	1.08848e-06	1606
GO:0019899	enzyme binding	molecular_function	1361/12078	1906/18422	1.08912	5.37901e-09	1.10276e-06	1361
GO:0005515	protein binding	molecular_function	4127/12078	6036/18422	1.04286	1.03129e-08	1.9434e-06	4127
GO:0036094	small molecule binding	molecular_function	1785/12078	2536/18422	1.07357	1.53487e-08	2.75331e-06	1785
GO:0005088	Ras guanyl-nucleotide exchange factor activity	molecular_function	161/12078	194/18422	1.2658	4.51941e-08	6.85481e-06	161
GO:0046873	metal ion transmembrane transporter activity	molecular_function	367/12078	478/18422	1.17106	4.65576e-08	7.00467e-06	367
GO:0035639	purine ribonucleoside triphosphate binding	molecular_function	1389/12078	1958/18422	1.08201	4.81615e-08	7.18801e-06	1389
GO:0032555	purine ribonucleotide binding	molecular_function	1424/12078	2010/18422	1.08058	5.2859e-08	7.76486e-06	1424
GO:0000976	transcription regulatory region sequence-specific DNA binding	molecular_function	472/12078	627/18422	1.1482	5.81878e-08	8.19252e-06	472
GO:1990837	sequence-specific double-stranded DNA binding	molecular_function	498/12078	664/18422	1.14394	5.84051e-08	8.19252e-06	498
GO:0032553	ribonucleotide binding	molecular_function	1432/12078	2023/18422	1.07966	6.65591e-08	9.19797e-06	1432
GO:0000987	proximal promoter sequence-specific DNA binding	molecular_function	268/12078	341/18422	1.19873	7.8772e-08	1.05724e-05	268
GO:0017076	purine nucleotide binding	molecular_function	1429/12078	2020/18422	1.079	8.68393e-08	1.13292e-05	1429
GO:0015294	solute:cation symporter activity	molecular_function	91/12078	103/18422	1.34755	1.08575e-07	1.36863e-05	91
GO:0000166	nucleotide binding	molecular_function	1576/12078	2243/18422	1.07169	2.52538e-07	2.87277e-05	1576
GO:1901265	nucleoside phosphate binding	molecular_function	1576/12078	2243/18422	1.07169	2.52538e-07	2.87277e-05	1576
GO:0015293	symporter activity	molecular_function	130/12078	155/18422	1.27924	2.61515e-07	2.95512e-05	130
GO:0000977	RNA polymerase II regulatory region sequence-specific DNA binding	molecular_function	418/12078	555/18422	1.14875	3.03146e-07	3.32676e-05	418
GO:0001012	RNA polymerase II regulatory region DNA binding	molecular_function	418/12078	555/18422	1.14875	3.03146e-07	3.32676e-05	418
GO:0000978	RNA polymerase II proximal promoter sequence-specific DNA binding	molecular_function	257/12078	329/18422	1.19146	3.77709e-07	4.04974e-05	257
GO:0038024	cargo receptor activity	molecular_function	60/12078	65/18422	1.40793	4.53667e-07	4.78171e-05	60
GO:0008092	cytoskeletal protein binding	molecular_function	656/12078	898/18422	1.11422	4.93609e-07	5.14457e-05	656
GO:0016772	transferase activity, transferring phosphorus-containing groups	molecular_function	760/12078	1050/18422	1.10399	6.76055e-07	6.81756e-05	760
GO:0022890	inorganic cation transmembrane transporter activity	molecular_function	448/12078	601/18422	1.13696	9.01856e-07	8.85527e-05	448
GO:0003779	actin binding	molecular_function	317/12078	418/18422	1.15671	2.80942e-06	0.000253201	317
GO:0022857	transmembrane transporter activity	molecular_function	759/12078	1055/18422	1.09731	3.01661e-06	0.000270567	759
GO:0048365	Rac GTPase binding	molecular_function	46/12078	49/18422	1.43187	3.06549e-06	0.000273635	46
GO:0005096	GTPase activator activity	molecular_function	204/12078	260/18422	1.19674	3.37608e-06	0.0002957	204
GO:0005201	extracellular matrix structural constituent	molecular_function	50/12078	54/18422	1.41227	3.44424e-06	0.000299126	50
GO:0004674	protein serine/threonine kinase activity	molecular_function	337/12078	447/18422	1.14991	3.56873e-06	0.000303782	337
GO:0008324	cation transmembrane transporter activity	molecular_function	488/12078	663/18422	1.12266	3.64905e-06	0.000308039	488
GO:0015075	ion transmembrane transporter activity	molecular_function	649/12078	898/18422	1.10233	6.19549e-06	0.000489759	649
GO:0015318	inorganic molecular entity transmembrane transporter activity	molecular_function	615/12078	849/18422	1.10486	6.80757e-06	0.000533622	615
GO:0015370	solute:sodium symporter activity	molecular_function	66/12078	75/18422	1.34222	8.69863e-06	0.000679003	66
GO:0003674	molecular_function	molecular_function	10141/12078	15309/18422	1.01036	1.02821e-05	0.000792658	10141
GO:0030695	GTPase regulator activity	molecular_function	219/12078	284/18422	1.17616	1.37718e-05	0.00101152	219
GO:0008047	enzyme activator activity	molecular_function	328/12078	440/18422	1.13701	2.52796e-05	0.00167835	328
GO:0019900	kinase binding	molecular_function	404/12078	550/18422	1.12037	3.37946e-05	0.00215178	404
GO:0001217	DNA-binding transcription repressor activity	molecular_function	150/12078	190/18422	1.20415	3.58728e-05	0.00223827	150
GO:0001227	DNA-binding transcription repressor activity, RNA polymerase II-specific	molecular_function	150/12078	190/18422	1.20415	3.58728e-05	0.00223827	150
GO:0005044	scavenger receptor activity	molecular_function	47/12078	52/18422	1.37859	3.67432e-05	0.00226232	47
GO:0005261	cation channel activity	molecular_function	258/12078	342/18422	1.15063	4.43034e-05	0.00264789	258
GO:0015081	sodium ion transmembrane transporter activity	molecular_function	133/12078	167/18422	1.21472	4.50598e-05	0.00266868	133
GO:0060589	nucleoside-triphosphatase regulator activity	molecular_function	241/12078	318/18422	1.15593	4.57259e-05	0.00269956	241
GO:0005215	transporter activity	molecular_function	876/12078	1241/18422	1.07665	5.45584e-05	0.00312221	876
GO:0022804	active transmembrane transporter activity	molecular_function	284/12078	380/18422	1.13993	6.26596e-05	0.00355312	284
GO:0003690	double-stranded DNA binding	molecular_function	554/12078	770/18422	1.09739	6.49381e-05	0.00364905	554
GO:0015291	secondary active transmembrane transporter activity	molecular_function	189/12078	246/18422	1.17184	7.64015e-05	0.004217	189
GO:0019901	protein kinase binding	molecular_function	354/12078	481/18422	1.12254	7.78424e-05	0.00427126	354
GO:0001216	DNA-binding transcription activator activity	molecular_function	248/12078	330/18422	1.14625	9.59307e-05	0.00515759	248
GO:0001228	DNA-binding transcription activator activity, RNA polymerase II-specific	molecular_function	248/12078	330/18422	1.14625	9.59307e-05	0.00515759	248
GO:0003677	DNA binding	molecular_function	1537/12078	2227/18422	1.05268	0.000126485	0.00659134	1537
GO:0004713	protein tyrosine kinase activity	molecular_function	130/12078	165/18422	1.20171	0.000137865	0.00710498	130
GO:0003824	catalytic activity	molecular_function	3849/12078	5708/18422	1.0285	0.000179793	0.00882689	3849
GO:0008234	cysteine-type peptidase activity	molecular_function	131/12078	167/18422	1.19646	0.000186936	0.00909236	131
GO:0005509	calcium ion binding	molecular_function	497/12078	692/18422	1.09545	0.000199313	0.0095695	497
GO:0003713	transcription coactivator activity	molecular_function	207/12078	274/18422	1.15229	0.000209523	0.00992098	207
GO:0003777	microtubule motor activity	molecular_function	76/12078	92/18422	1.25999	0.00022436	0.0105129	76
GO:0019783	ubiquitin-like protein-specific protease activity	molecular_function	87/12078	107/18422	1.24016	0.000243497	0.0112386	87
GO:0008289	lipid binding	molecular_function	449/12078	623/18422	1.09926	0.000244529	0.0112386	449
GO:0005089	Rho guanyl-nucleotide exchange factor activity	molecular_function	68/12078	82/18422	1.26484	0.000382164	0.0162777	68
GO:0070325	lipoprotein particle receptor binding	molecular_function	28/12078	30/18422	1.42357	0.000428751	0.0178475	28
GO:0051393	alpha-actinin binding	molecular_function	32/12078	35/18422	1.39452	0.000429216	0.0178475	32
GO:0022853	active ion transmembrane transporter activity	molecular_function	194/12078	258/18422	1.1469	0.000501551	0.0205196	194
GO:0004714	transmembrane receptor protein tyrosine kinase activity	molecular_function	58/12078	69/18422	1.2821	0.000506433	0.0206289	58
GO:0008233	peptidase activity	molecular_function	450/12078	628/18422	1.09294	0.000534829	0.0215969	450
GO:0005216	ion channel activity	molecular_function	324/12078	445/18422	1.11052	0.00055631	0.0223194	324
GO:0016740	transferase activity	molecular_function	1596/12078	2328/18422	1.04566	0.000582435	0.0231683	1596
GO:0022803	passive transmembrane transporter activity	molecular_function	339/12078	467/18422	1.1072	0.000596793	0.0236386	339
GO:1990841	promoter-specific chromatin binding	molecular_function	27/12078	29/18422	1.42006	0.000613594	0.0241502	27
GO:0019902	phosphatase binding	molecular_function	109/12078	139/18422	1.19606	0.000644728	0.025269	109
GO:0015267	channel activity	molecular_function	338/12078	466/18422	1.1063	0.000666872	0.0260275	338
GO:0005518	collagen binding	molecular_function	44/12078	51/18422	1.3159	0.000779969	0.0297568	44
GO:0015923	mannosidase activity	molecular_function	22/12078	23/18422	1.45894	0.000789532	0.029999	22
GO:0030234	enzyme regulator activity	molecular_function	623/12078	885/18422	1.07371	0.000979088	0.0351944	623
GO:0004559	alpha-mannosidase activity	molecular_function	21/12078	22/18422	1.45592	0.00115651	0.0403287	21
GO:0015026	coreceptor activity	molecular_function	21/12078	22/18422	1.45592	0.00115651	0.0403287	21
GO:0005229	intracellular calcium activated chloride channel activity	molecular_function	16/12078	16/18422	1.52525	0.00116157	0.0403542	16
GO:0061778	intracellular chloride channel activity	molecular_function	16/12078	16/18422	1.52525	0.00116157	0.0403542	16
GO:0008013	beta-catenin binding	molecular_function	66/12078	81/18422	1.2428	0.00120845	0.0414772	66
GO:0036459	thiol-dependent ubiquitinyl hydrolase activity	molecular_function	79/12078	99/18422	1.21712	0.00138242	0.0462193	79
GO:0019199	transmembrane receptor protein kinase activity	molecular_function	68/12078	84/18422	1.23473	0.00143769	0.0476403	68
GO:0070011	peptidase activity, acting on L-amino acid peptides	molecular_function	433/12078	608/18422	1.08624	0.00145606	0.0481636	433
GO:0022839	ion gated channel activity	molecular_function	246/12078	336/18422	1.1167	0.0014756	0.0485518	246
GO:0022836	gated channel activity	molecular_function	250/12078	342/18422	1.11495	0.00156937	0.0510961	250
GO:0004843	thiol-dependent ubiquitin-specific protease activity	molecular_function	59/12078	72/18422	1.24986	0.00166875	0.0535837	59
GO:0015296	anion:cation symporter activity	molecular_function	20/12078	21/18422	1.45262	0.00169105	0.0541137	20
GO:0042805	actinin binding	molecular_function	38/12078	44/18422	1.31726	0.0017323	0.0552442	38
GO:0003712	transcription coregulator activity	molecular_function	353/12078	492/18422	1.09434	0.0017614	0.0560762	353
GO:0016874	ligase activity	molecular_function	133/12078	175/18422	1.15919	0.00179363	0.0568113	133
GO:0005326	neurotransmitter transmembrane transporter activity	molecular_function	41/12078	48/18422	1.30282	0.00181035	0.0572439	41
GO:0019904	protein domain specific binding	molecular_function	437/12078	615/18422	1.0838	0.00182118	0.0574887	437
GO:0015077	monovalent inorganic cation transmembrane transporter activity	molecular_function	282/12078	389/18422	1.10571	0.00187532	0.0586029	282
GO:0015085	calcium ion transmembrane transporter activity	molecular_function	113/12078	147/18422	1.17247	0.0019331	0.0601064	113
GO:0001047	core promoter binding	molecular_function	130/12078	171/18422	1.15955	0.00196793	0.0606839	130
GO:0003774	motor activity	molecular_function	122/12078	160/18422	1.16301	0.00221127	0.0664307	122
GO:0035591	signaling adaptor activity	molecular_function	66/12078	82/18422	1.22764	0.00223422	0.0670121	66
GO:0005328	neurotransmitter:sodium symporter activity	molecular_function	27/12078	30/18422	1.37273	0.00227718	0.0678643	27
GO:0101005	ubiquitinyl hydrolase activity	molecular_function	79/12078	100/18422	1.20495	0.00236573	0.0699447	79
GO:0050840	extracellular matrix binding	molecular_function	40/12078	47/18422	1.29809	0.00238282	0.0702274	40
GO:0005416	amino acid:cation symporter activity	molecular_function	19/12078	20/18422	1.44899	0.00246787	0.0719385	19
GO:0030159	receptor signaling complex adaptor activity	molecular_function	30/12078	34/18422	1.34581	0.00265028	0.0755803	30
GO:0005539	glycosaminoglycan binding	molecular_function	135/12078	179/18422	1.15033	0.00277442	0.0779512	135
GO:0061629	RNA polymerase II-specific DNA-binding transcription factor binding	molecular_function	158/12078	212/18422	1.13674	0.00301022	0.0829523	158
GO:0008134	transcription factor binding	molecular_function	388/12078	546/18422	1.08388	0.00315361	0.0862664	388
GO:0099094	ligand-gated cation channel activity	molecular_function	80/12078	102/18422	1.19628	0.00322773	0.0880359	80
GO:0004709	MAP kinase kinase kinase activity	molecular_function	22/12078	24/18422	1.39815	0.0035551	0.0952931	22
GO:0015149	hexose transmembrane transporter activity	molecular_function	18/12078	19/18422	1.44498	0.00359394	0.0952937	18
GO:0008514	organic anion transmembrane transporter activity	molecular_function	168/12078	227/18422	1.12882	0.00373657	0.0979066	168
GO:0030276	clathrin binding	molecular_function	47/12078	57/18422	1.25766	0.00384939	0.100358	47
GO:0008188	neuropeptide receptor activity	molecular_function	38/12078	45/18422	1.28799	0.00408868	0.104742	38
GO:0043621	protein self-association	molecular_function	38/12078	45/18422	1.28799	0.00408868	0.104742	38
GO:0015279	store-operated calcium channel activity	molecular_function	13/12078	13/18422	1.52525	0.00412659	0.104742	13
GO:0050780	dopamine receptor binding	molecular_function	13/12078	13/18422	1.52525	0.00412659	0.104742	13
GO:0005543	phospholipid binding	molecular_function	257/12078	356/18422	1.1011	0.00415793	0.105395	257
GO:0140297	DNA-binding transcription factor binding	molecular_function	201/12078	275/18422	1.11482	0.00431523	0.10879	201
GO:0008236	serine-type peptidase activity	molecular_function	120/12078	159/18422	1.15113	0.00444532	0.11102	120
GO:0035257	nuclear hormone receptor binding	molecular_function	88/12078	114/18422	1.17739	0.00475527	0.117618	88
GO:0004222	metalloendopeptidase activity	molecular_function	83/12078	107/18422	1.18314	0.00475993	0.117618	83
GO:0050750	low-density lipoprotein particle receptor binding	molecular_function	21/12078	23/18422	1.39262	0.00500979	0.122494	21
GO:0048029	monosaccharide binding	molecular_function	43/12078	52/18422	1.26127	0.00509557	0.124026	43
GO:0005262	calcium channel activity	molecular_function	95/12078	124/18422	1.16854	0.00509906	0.124026	95
GO:0015377	cation:chloride symporter activity	molecular_function	17/12078	18/18422	1.44052	0.00522169	0.124892	17
GO:0098960	postsynaptic neurotransmitter receptor activity	molecular_function	34/12078	40/18422	1.29646	0.00531953	0.126583	34
GO:0004175	endopeptidase activity	molecular_function	296/12078	414/18422	1.09052	0.00539174	0.12765	296
GO:0016825	hydrolase activity, acting on acid phosphorus-nitrogen bonds	molecular_function	121/12078	161/18422	1.14631	0.00547654	0.129166	121
GO:0017171	serine hydrolase activity	molecular_function	121/12078	161/18422	1.14631	0.00547654	0.129166	121
GO:0046332	SMAD binding	molecular_function	56/12078	70/18422	1.2202	0.00606651	0.140592	56
GO:0008509	anion transmembrane transporter activity	molecular_function	264/12078	368/18422	1.0942	0.0062897	0.143422	264
GO:0001091	RNA polymerase II general transcription initiation factor binding	molecular_function	12/12078	12/18422	1.52525	0.00629624	0.143422	12
GO:0008349	MAP kinase kinase kinase kinase activity	molecular_function	12/12078	12/18422	1.52525	0.00629624	0.143422	12
GO:0060229	lipase activator activity	molecular_function	12/12078	12/18422	1.52525	0.00629624	0.143422	12
GO:0001085	RNA polymerase II transcription factor binding	molecular_function	39/12078	47/18422	1.26564	0.0067516	0.151392	39
GO:0005496	steroid binding	molecular_function	58/12078	73/18422	1.21184	0.00694839	0.153045	58
GO:0035258	steroid hormone receptor binding	molecular_function	50/12078	62/18422	1.23004	0.00696316	0.153189	50
GO:0015145	monosaccharide transmembrane transporter activity	molecular_function	20/12078	22/18422	1.38659	0.00703646	0.153355	20
GO:0016922	nuclear receptor binding	molecular_function	63/12078	80/18422	1.20114	0.00724084	0.157259	63
GO:0005001	transmembrane receptor protein tyrosine phosphatase activity	molecular_function	16/12078	17/18422	1.43553	0.0075673	0.162084	16
GO:0005355	glucose transmembrane transporter activity	molecular_function	16/12078	17/18422	1.43553	0.0075673	0.162084	16
GO:0019198	transmembrane receptor protein phosphatase activity	molecular_function	16/12078	17/18422	1.43553	0.0075673	0.162084	16
GO:0051015	actin filament binding	molecular_function	123/12078	165/18422	1.13701	0.00811637	0.171387	123
GO:0008017	microtubule binding	molecular_function	171/12078	234/18422	1.11461	0.00812298	0.171387	171
GO:0005158	insulin receptor binding	molecular_function	23/12078	26/18422	1.34926	0.00819453	0.171387	23
GO:0015276	ligand-gated ion channel activity	molecular_function	106/12078	141/18422	1.14664	0.00883454	0.181664	106
GO:0022834	ligand-gated channel activity	molecular_function	106/12078	141/18422	1.14664	0.00883454	0.181664	106
GO:0017137	Rab GTPase binding	molecular_function	113/12078	151/18422	1.14141	0.00891758	0.18282	113
GO:0005178	integrin binding	molecular_function	77/12078	100/18422	1.17444	0.00892828	0.182839	77
GO:0015144	carbohydrate transmembrane transporter activity	molecular_function	29/12078	34/18422	1.30095	0.00911581	0.185259	29
GO:0050681	androgen receptor binding	molecular_function	29/12078	34/18422	1.30095	0.00911581	0.185259	29
GO:0051427	hormone receptor binding	molecular_function	101/12078	134/18422	1.14963	0.00919418	0.18624	101
GO:0044877	protein-containing complex binding	molecular_function	592/12078	854/18422	1.05732	0.00947411	0.190372	592
GO:0030594	neurotransmitter receptor activity	molecular_function	84/12078	110/18422	1.16474	0.00947985	0.190372	84
GO:0005521	lamin binding	molecular_function	11/12078	11/18422	1.52525	0.00960637	0.191675	11
GO:0008331	high voltage-gated calcium channel activity	molecular_function	11/12078	11/18422	1.52525	0.00960637	0.191675	11
GO:0008417	fucosyltransferase activity	molecular_function	11/12078	11/18422	1.52525	0.00960637	0.191675	11
GO:0051219	phosphoprotein binding	molecular_function	51/12078	64/18422	1.21544	0.0100029	0.196851	51
GO:0004252	serine-type endopeptidase activity	molecular_function	98/12078	130/18422	1.14981	0.0101256	0.198219	98
GO:0016887	ATPase activity	molecular_function	248/12078	347/18422	1.09009	0.0104975	0.203596	248
GO:0051213	dioxygenase activity	molecular_function	71/12078	92/18422	1.1771	0.0107652	0.207061	71
GO:0005283	amino acid:sodium symporter activity	molecular_function	15/12078	16/18422	1.42992	0.0109356	0.207121	15
GO:0097493	structural molecule activity conferring elasticity	molecular_function	15/12078	16/18422	1.42992	0.0109356	0.207121	15
GO:0004879	nuclear receptor activity	molecular_function	37/12078	45/18422	1.2541	0.0110644	0.208285	37
GO:0098531	ligand-activated transcription factor activity	molecular_function	37/12078	45/18422	1.2541	0.0110644	0.208285	37
GO:0016849	phosphorus-oxygen lyase activity	molecular_function	22/12078	25/18422	1.34222	0.0111817	0.208285	22
GO:0030552	cAMP binding	molecular_function	22/12078	25/18422	1.34222	0.0111817	0.208285	22
GO:0043236	laminin binding	molecular_function	22/12078	25/18422	1.34222	0.0111817	0.208285	22
GO:0051119	sugar transmembrane transporter activity	molecular_function	22/12078	25/18422	1.34222	0.0111817	0.208285	22
GO:0098772	molecular function regulator	molecular_function	1042/12078	1527/18422	1.04081	0.0112989	0.209935	1042
GO:0015485	cholesterol binding	molecular_function	28/12078	33/18422	1.29415	0.0120169	0.218719	28
GO:0017112	Rab guanyl-nucleotide exchange factor activity	molecular_function	28/12078	33/18422	1.29415	0.0120169	0.218719	28
GO:0019838	growth factor binding	molecular_function	80/12078	105/18422	1.1621	0.0123323	0.223131	80
GO:0050660	flavin adenine dinucleotide binding	molecular_function	55/12078	70/18422	1.19841	0.0127678	0.229697	55
GO:0005342	organic acid transmembrane transporter activity	molecular_function	117/12078	158/18422	1.12946	0.0135724	0.241379	117
GO:0022843	voltage-gated cation channel activity	molecular_function	117/12078	158/18422	1.12946	0.0135724	0.241379	117
GO:0016405	CoA-ligase activity	molecular_function	18/12078	20/18422	1.37273	0.0137285	0.243691	18
GO:0005113	patched binding	molecular_function	10/12078	10/18422	1.52525	0.0146563	0.251082	10
GO:0016004	phospholipase activator activity	molecular_function	10/12078	10/18422	1.52525	0.0146563	0.251082	10
GO:0030228	lipoprotein particle receptor activity	molecular_function	10/12078	10/18422	1.52525	0.0146563	0.251082	10
GO:0032794	GTPase activating protein binding	molecular_function	10/12078	10/18422	1.52525	0.0146563	0.251082	10
GO:0035014	phosphatidylinositol 3-kinase regulator activity	molecular_function	10/12078	10/18422	1.52525	0.0146563	0.251082	10
GO:0035612	AP-2 adaptor complex binding	molecular_function	10/12078	10/18422	1.52525	0.0146563	0.251082	10
GO:0005003	ephrin receptor activity	molecular_function	21/12078	24/18422	1.3346	0.0151927	0.257902	21
GO:0042578	phosphoric ester hydrolase activity	molecular_function	272/12078	384/18422	1.08039	0.0152285	0.258276	272
GO:0046943	carboxylic acid transmembrane transporter activity	molecular_function	116/12078	157/18422	1.12694	0.0155461	0.25926	116
GO:0008484	sulfuric ester hydrolase activity	molecular_function	14/12078	15/18422	1.42357	0.0157534	0.25926	14
GO:0015373	anion:sodium symporter activity	molecular_function	14/12078	15/18422	1.42357	0.0157534	0.25926	14
GO:0015645	fatty acid ligase activity	molecular_function	14/12078	15/18422	1.42357	0.0157534	0.25926	14
GO:0097159	organic cyclic compound binding	molecular_function	3992/12078	5990/18422	1.0165	0.0165866	0.271201	3992
GO:0043178	alcohol binding	molecular_function	51/12078	65/18422	1.19674	0.0169985	0.276481	51
GO:0003707	steroid hormone receptor activity	molecular_function	43/12078	54/18422	1.21455	0.0179134	0.288345	43
GO:0004620	phospholipase activity	molecular_function	63/12078	82/18422	1.17184	0.0185875	0.296637	63
GO:0005540	hyaluronic acid binding	molecular_function	17/12078	19/18422	1.3647	0.0190575	0.298771	17
GO:0051371	muscle alpha-actinin binding	molecular_function	17/12078	19/18422	1.3647	0.0190575	0.298771	17
GO:0046915	transition metal ion transmembrane transporter activity	molecular_function	29/12078	35/18422	1.26378	0.0198888	0.309463	29
GO:0004197	cysteine-type endopeptidase activity	molecular_function	55/12078	71/18422	1.18153	0.020712	0.315689	55
GO:0005343	organic acid:sodium symporter activity	molecular_function	23/12078	27/18422	1.29929	0.0209193	0.316779	23
GO:0032452	histone demethylase activity	molecular_function	23/12078	27/18422	1.29929	0.0209193	0.316779	23
GO:0005516	calmodulin binding	molecular_function	138/12078	190/18422	1.10781	0.022145	0.323952	138
GO:0016298	lipase activity	molecular_function	74/12078	98/18422	1.15172	0.0221723	0.323952	74
GO:0050839	cell adhesion molecule binding	molecular_function	293/12078	417/18422	1.0717	0.0222997	0.323952	293
GO:0000900	translation repressor activity, mRNA regulatory element binding	molecular_function	9/12078	9/18422	1.52525	0.0223603	0.323952	9
GO:0005381	iron ion transmembrane transporter activity	molecular_function	9/12078	9/18422	1.52525	0.0223603	0.323952	9
GO:0005536	glucose binding	molecular_function	9/12078	9/18422	1.52525	0.0223603	0.323952	9
GO:0015467	G-protein activated inward rectifier potassium channel activity	molecular_function	9/12078	9/18422	1.52525	0.0223603	0.323952	9
GO:0019992	diacylglycerol binding	molecular_function	9/12078	9/18422	1.52525	0.0223603	0.323952	9
GO:0031957	very long-chain fatty acid-CoA ligase activity	molecular_function	9/12078	9/18422	1.52525	0.0223603	0.323952	9
GO:0031994	insulin-like growth factor I binding	molecular_function	9/12078	9/18422	1.52525	0.0223603	0.323952	9
GO:0038036	sphingosine-1-phosphate receptor activity	molecular_function	9/12078	9/18422	1.52525	0.0223603	0.323952	9
GO:0097109	neuroligin family protein binding	molecular_function	9/12078	9/18422	1.52525	0.0223603	0.323952	9
GO:0001968	fibronectin binding	molecular_function	13/12078	14/18422	1.41631	0.0226136	0.323952	13
GO:0008157	protein phosphatase 1 binding	molecular_function	13/12078	14/18422	1.41631	0.0226136	0.323952	13
GO:0008409	5'-3' exonuclease activity	molecular_function	13/12078	14/18422	1.41631	0.0226136	0.323952	13
GO:0015924	mannosyl-oligosaccharide mannosidase activity	molecular_function	13/12078	14/18422	1.41631	0.0226136	0.323952	13
GO:0001786	phosphatidylserine binding	molecular_function	28/12078	34/18422	1.25609	0.0255552	0.356547	28
GO:0005086	ARF guanyl-nucleotide exchange factor activity	molecular_function	16/12078	18/18422	1.35578	0.0263322	0.360951	16
GO:0016881	acid-amino acid ligase activity	molecular_function	16/12078	18/18422	1.35578	0.0263322	0.360951	16
GO:0008270	zinc ion binding	molecular_function	526/12078	764/18422	1.05011	0.0271972	0.370062	526
GO:0003682	chromatin binding	molecular_function	349/12078	501/18422	1.0625	0.0272396	0.370125	349
GO:0009975	cyclase activity	molecular_function	22/12078	26/18422	1.2906	0.0276111	0.370336	22
GO:0015295	solute:proton symporter activity	molecular_function	19/12078	22/18422	1.31726	0.0276521	0.370336	19
GO:0030165	PDZ domain binding	molecular_function	63/12078	83/18422	1.15772	0.028137	0.375751	63
GO:0051539	4 iron, 4 sulfur cluster binding	molecular_function	33/12078	41/18422	1.22764	0.0283117	0.376887	33
GO:0016787	hydrolase activity	molecular_function	1650/12078	2453/18422	1.02595	0.029591	0.39236	1650
GO:0015171	amino acid transmembrane transporter activity	molecular_function	65/12078	86/18422	1.15281	0.0299616	0.394748	65
GO:0042826	histone deacetylase binding	molecular_function	79/12078	106/18422	1.13674	0.0302839	0.397311	79
GO:1901618	organic hydroxy compound transmembrane transporter activity	molecular_function	30/12078	37/18422	1.23669	0.0305119	0.3989	30
GO:1901363	heterocyclic compound binding	molecular_function	3944/12078	5929/18422	1.01461	0.0307896	0.401967	3944
GO:1901681	sulfur compound binding	molecular_function	146/12078	203/18422	1.09698	0.0311812	0.405943	146
GO:0016791	phosphatase activity	molecular_function	200/12078	282/18422	1.08174	0.0312495	0.406549	200
GO:0001653	peptide receptor activity	molecular_function	81/12078	109/18422	1.13344	0.0316942	0.41176	81
GO:0004467	long-chain fatty acid-CoA ligase activity	molecular_function	12/12078	13/18422	1.40793	0.0323321	0.413993	12
GO:0017154	semaphorin receptor activity	molecular_function	12/12078	13/18422	1.40793	0.0323321	0.413993	12
GO:0019215	intermediate filament binding	molecular_function	12/12078	13/18422	1.40793	0.0323321	0.413993	12
GO:0045125	bioactive lipid receptor activity	molecular_function	12/12078	13/18422	1.40793	0.0323321	0.413993	12
GO:0017124	SH3 domain binding	molecular_function	90/12078	122/18422	1.12519	0.0324595	0.414197	90
GO:0072341	modified amino acid binding	molecular_function	45/12078	58/18422	1.18339	0.0334057	0.420629	45
GO:0004767	sphingomyelin phosphodiesterase activity	molecular_function	8/12078	8/18422	1.52525	0.0341129	0.420629	8
GO:0005041	low-density lipoprotein particle receptor activity	molecular_function	8/12078	8/18422	1.52525	0.0341129	0.420629	8
GO:0008131	primary amine oxidase activity	molecular_function	8/12078	8/18422	1.52525	0.0341129	0.420629	8
GO:0015379	potassium:chloride symporter activity	molecular_function	8/12078	8/18422	1.52525	0.0341129	0.420629	8
GO:0030306	ADP-ribosylation factor binding	molecular_function	8/12078	8/18422	1.52525	0.0341129	0.420629	8
GO:0039706	co-receptor binding	molecular_function	8/12078	8/18422	1.52525	0.0341129	0.420629	8
GO:0048256	flap endonuclease activity	molecular_function	8/12078	8/18422	1.52525	0.0341129	0.420629	8
GO:0071936	coreceptor activity involved in Wnt signaling pathway	molecular_function	8/12078	8/18422	1.52525	0.0341129	0.420629	8
GO:0045503	dynein light chain binding	molecular_function	24/12078	29/18422	1.26228	0.0346663	0.425203	24
GO:0019903	protein phosphatase binding	molecular_function	71/12078	95/18422	1.13993	0.035305	0.43049	71
GO:0032934	sterol binding	molecular_function	32/12078	40/18422	1.2202	0.0354121	0.430951	32
GO:0031690	adrenergic receptor binding	molecular_function	15/12078	17/18422	1.34581	0.0361977	0.434351	15
GO:0046625	sphingolipid binding	molecular_function	15/12078	17/18422	1.34581	0.0361977	0.434351	15
GO:0099529	neurotransmitter receptor activity involved in regulation of postsynaptic membrane potential	molecular_function	15/12078	17/18422	1.34581	0.0361977	0.434351	15
GO:1904315	transmitter-gated ion channel activity involved in regulation of postsynaptic membrane potential	molecular_function	15/12078	17/18422	1.34581	0.0361977	0.434351	15
GO:0030374	nuclear receptor transcription coactivator activity	molecular_function	37/12078	47/18422	1.20073	0.0366318	0.437855	37
GO:0005231	excitatory extracellular ligand-gated ion channel activity	molecular_function	42/12078	54/18422	1.18631	0.0368594	0.437855	42
GO:0022824	transmitter-gated ion channel activity	molecular_function	42/12078	54/18422	1.18631	0.0368594	0.437855	42
GO:0022835	transmitter-gated channel activity	molecular_function	42/12078	54/18422	1.18631	0.0368594	0.437855	42
GO:0004725	protein tyrosine phosphatase activity	molecular_function	82/12078	111/18422	1.12676	0.0380622	0.448572	82
GO:0005102	signaling receptor binding	molecular_function	834/12078	1228/18422	1.03588	0.0382876	0.449804	834
GO:0008201	heparin binding	molecular_function	100/12078	137/18422	1.11332	0.0384327	0.449804	100
GO:0015079	potassium ion transmembrane transporter activity	molecular_function	133/12078	185/18422	1.09653	0.0390618	0.455162	133
GO:0008066	glutamate receptor activity	molecular_function	34/12078	43/18422	1.20601	0.0402109	0.465947	34
GO:0052866	phosphatidylinositol phosphate phosphatase activity	molecular_function	26/12078	32/18422	1.23927	0.0415641	0.47777	26
GO:0008528	G protein-coupled peptide receptor activity	molecular_function	79/12078	107/18422	1.12612	0.042057	0.481359	79
GO:0004896	cytokine receptor activity	molecular_function	58/12078	77/18422	1.14889	0.0431977	0.4917	58
GO:0015248	sterol transporter activity	molecular_function	23/12078	28/18422	1.25289	0.0446022	0.500159	23
GO:0004715	non-membrane spanning protein tyrosine kinase activity	molecular_function	41/12078	53/18422	1.17991	0.0446111	0.500159	41
GO:0043177	organic acid binding	molecular_function	101/12078	139/18422	1.10828	0.0447491	0.500296	101
GO:0004571	mannosyl-oligosaccharide 1,2-alpha-mannosidase activity	molecular_function	11/12078	12/18422	1.39815	0.0460178	0.500296	11
GO:0005005	transmembrane-ephrin receptor activity	molecular_function	11/12078	12/18422	1.39815	0.0460178	0.500296	11
GO:0015378	sodium:chloride symporter activity	molecular_function	11/12078	12/18422	1.39815	0.0460178	0.500296	11
GO:0030676	Rac guanyl-nucleotide exchange factor activity	molecular_function	11/12078	12/18422	1.39815	0.0460178	0.500296	11
GO:0035925	mRNA 3'-UTR AU-rich region binding	molecular_function	11/12078	12/18422	1.39815	0.0460178	0.500296	11
GO:0001046	core promoter sequence-specific DNA binding	molecular_function	85/12078	116/18422	1.11764	0.0468087	0.506239	85
GO:0004386	helicase activity	molecular_function	116/12078	161/18422	1.09894	0.0470945	0.507089	116
GO:0005319	lipid transporter activity	molecular_function	105/12078	145/18422	1.10449	0.0471127	0.507089	105
GO:0016878	acid-thiol ligase activity	molecular_function	20/12078	24/18422	1.27104	0.0473221	0.507089	20
GO:0004383	guanylate cyclase activity	molecular_function	17/12078	20/18422	1.29646	0.0492554	0.513999	17
GO:0034237	protein kinase A regulatory subunit binding	molecular_function	14/12078	16/18422	1.3346	0.0494779	0.513999	14
GO:0106018	phosphatidylinositol-3,5-bisphosphate phosphatase activity	molecular_function	14/12078	16/18422	1.3346	0.0494779	0.513999	14
