# Supplementary material for: Identification of Potential miRNA–mRNA Regulatory Network Associated with Growth and Development of Hair Follicles in Forest Musk Deer
Source: Animals (Basel). 2023 Dec 15;13(24):3869. doi: 10.3390/ani13243869 (PMC10740511; doi:10.3390/ani13243869)
Supplement: Supplementary file 1 [file animals-13-03869-s001.zip › Supplementary Table S15.xlsx]

## Sheet: Sheet1
Supplementary Table S15 KEGG pathway analysis of DEmiRNA target genes in the HFs of FMD at the anagen stage and catagen stage
TermID	Description	Category	GeneRatio	BgRatio	Enrich_factor	P_value	P_adjust	GeneCount	GeneIDs	GeneNames
ko04925	Aldosterone synthesis and secretion	Organismal Systems	52/3525	55/4730	1.26865	0.000109879	0.0347216	52	evm.TU.scaffold1.32,evm.TU.scaffold1006.22141,evm.TU.scaffold102.8312,evm.TU.scaffold1113.22599,evm.TU.scaffold1128.22657,evm.TU.scaffold12.1215,evm.TU.scaffold120.9061,evm.TU.scaffold120.9089,evm.TU.scaffold127.9375,evm.TU.scaffold131.9591,evm.TU.scaffold142.10032,evm.TU.scaffold148.10328,evm.TU.scaffold148.10336,evm.TU.scaffold170.10923,evm.TU.scaffold18.1839,evm.TU.scaffold18.1889,evm.TU.scaff…	evm.TU.scaffold1.32,evm.TU.scaffold1006.22141,evm.TU.scaffold102.8312,evm.TU.scaffold1113.22599,evm.TU.scaffold1128.22657,evm.TU.scaffold12.1215,evm.TU.scaffold120.9061,evm.TU.scaffold120.9089,evm.TU.scaffold127.9375,evm.TU.scaffold131.9591,evm.TU.scaffold142.10032,evm.TU.scaffold148.10328,evm.TU.scaffold148.10336,evm.TU.scaffold170.10923,evm.TU.scaffold18.1839,evm.TU.scaffold18.1889,evm.TU.scaff…
ko04360	Axon guidance	Organismal Systems	102/3525	116/4730	1.1799	0.000259278	0.040966	102	evm.TU.scaffold101.8257,evm.TU.scaffold1014.22172,evm.TU.scaffold103.8375,evm.TU.scaffold1056.22341,evm.TU.scaffold11.1109,evm.TU.scaffold110.8594,evm.TU.scaffold117.8924,evm.TU.scaffold120.9105,evm.TU.scaffold127.9391,evm.TU.scaffold1275.23135,evm.TU.scaffold129.9482,evm.TU.scaffold129.9492,evm.TU.scaffold130.9579,evm.TU.scaffold134.9699,evm.TU.scaffold135.9706,evm.TU.scaffold1369.23411,evm.TU.s…	evm.TU.scaffold101.8257,evm.TU.scaffold1014.22172,evm.TU.scaffold103.8375,evm.TU.scaffold1056.22341,evm.TU.scaffold11.1109,evm.TU.scaffold110.8594,evm.TU.scaffold117.8924,evm.TU.scaffold120.9105,evm.TU.scaffold127.9391,evm.TU.scaffold1275.23135,evm.TU.scaffold129.9482,evm.TU.scaffold129.9492,evm.TU.scaffold130.9579,evm.TU.scaffold134.9699,evm.TU.scaffold135.9706,evm.TU.scaffold1369.23411,evm.TU.s…
ko02010	ABC transporters	Environmental Information Processing	39/3525	41/4730	1.27639	0.000619124	0.0652144	39	evm.TU.scaffold1063.22359,evm.TU.scaffold1072.22395,evm.TU.scaffold109.8587,evm.TU.scaffold1122.22626,evm.TU.scaffold1122.22627,evm.TU.scaffold12.1214,evm.TU.scaffold125.9294,evm.TU.scaffold131.9609,evm.TU.scaffold131.9610,evm.TU.scaffold139.9872,evm.TU.scaffold14.1527,evm.TU.scaffold142.10005,evm.TU.scaffold1461.23604,evm.TU.scaffold16.1668,evm.TU.scaffold173.11007,evm.TU.scaffold18.1865,evm.TU.…	evm.TU.scaffold1063.22359,evm.TU.scaffold1072.22395,evm.TU.scaffold109.8587,evm.TU.scaffold1122.22626,evm.TU.scaffold1122.22627,evm.TU.scaffold12.1214,evm.TU.scaffold125.9294,evm.TU.scaffold131.9609,evm.TU.scaffold131.9610,evm.TU.scaffold139.9872,evm.TU.scaffold14.1527,evm.TU.scaffold142.10005,evm.TU.scaffold1461.23604,evm.TU.scaffold16.1668,evm.TU.scaffold173.11007,evm.TU.scaffold18.1865,evm.TU.…
ko04024	cAMP signaling pathway	Environmental Information Processing	121/3525	142/4730	1.1434	0.00130454	0.0825628	121	evm.TU.scaffold10.1001,evm.TU.scaffold10.999,evm.TU.scaffold101.8125,evm.TU.scaffold101.8206,evm.TU.scaffold102.8312,evm.TU.scaffold109.8587,evm.TU.scaffold1093.22480,evm.TU.scaffold11.1108,evm.TU.scaffold1113.22599,evm.TU.scaffold113.8719,evm.TU.scaffold117.8924,evm.TU.scaffold117.8929,evm.TU.scaffold12.1312,evm.TU.scaffold120.9039,evm.TU.scaffold120.9088,evm.TU.scaffold120.9089,evm.TU.scaffold1…	evm.TU.scaffold10.1001,evm.TU.scaffold10.999,evm.TU.scaffold101.8125,evm.TU.scaffold101.8206,evm.TU.scaffold102.8312,evm.TU.scaffold109.8587,evm.TU.scaffold1093.22480,evm.TU.scaffold11.1108,evm.TU.scaffold1113.22599,evm.TU.scaffold113.8719,evm.TU.scaffold117.8924,evm.TU.scaffold117.8929,evm.TU.scaffold12.1312,evm.TU.scaffold120.9039,evm.TU.scaffold120.9088,evm.TU.scaffold120.9089,evm.TU.scaffold1…
ko05030	Cocaine addiction	Human Diseases	36/3525	38/4730	1.27122	0.00130637	0.0825628	36	evm.TU.scaffold102.8312,evm.TU.scaffold113.8719,evm.TU.scaffold12.1312,evm.TU.scaffold120.9089,evm.TU.scaffold137.9833,evm.TU.scaffold148.10328,evm.TU.scaffold182.11267,evm.TU.scaffold206.11924,evm.TU.scaffold234.12688,evm.TU.scaffold234.12754,evm.TU.scaffold24.2397,evm.TU.scaffold25.2596,evm.TU.scaffold250.13273,evm.TU.scaffold253.13313,evm.TU.scaffold269.13713,evm.TU.scaffold278.13955,evm.TU.sc…	evm.TU.scaffold102.8312,evm.TU.scaffold113.8719,evm.TU.scaffold12.1312,evm.TU.scaffold120.9089,evm.TU.scaffold137.9833,evm.TU.scaffold148.10328,evm.TU.scaffold182.11267,evm.TU.scaffold206.11924,evm.TU.scaffold234.12688,evm.TU.scaffold234.12754,evm.TU.scaffold24.2397,evm.TU.scaffold25.2596,evm.TU.scaffold250.13273,evm.TU.scaffold253.13313,evm.TU.scaffold269.13713,evm.TU.scaffold278.13955,evm.TU.sc…
ko04970	Salivary secretion	Organismal Systems	48/3525	53/4730	1.21525	0.0030297	0.156993	48	evm.TU.scaffold1128.22657,evm.TU.scaffold127.9378,evm.TU.scaffold130.9580,evm.TU.scaffold131.9591,evm.TU.scaffold142.10032,evm.TU.scaffold1513.23693,evm.TU.scaffold160.10640,evm.TU.scaffold1600.23825,evm.TU.scaffold1600.23826,evm.TU.scaffold169.10846,evm.TU.scaffold18.1794,evm.TU.scaffold180.11181,evm.TU.scaffold206.11925,evm.TU.scaffold2117.24235,evm.TU.scaffold219.12279,evm.TU.scaffold230.12606…	evm.TU.scaffold1128.22657,evm.TU.scaffold127.9378,evm.TU.scaffold130.9580,evm.TU.scaffold131.9591,evm.TU.scaffold142.10032,evm.TU.scaffold1513.23693,evm.TU.scaffold160.10640,evm.TU.scaffold1600.23825,evm.TU.scaffold1600.23826,evm.TU.scaffold169.10846,evm.TU.scaffold18.1794,evm.TU.scaffold180.11181,evm.TU.scaffold206.11925,evm.TU.scaffold2117.24235,evm.TU.scaffold219.12279,evm.TU.scaffold230.12606…
ko04919	Thyroid hormone signaling pathway	Organismal Systems	74/3525	85/4730	1.16819	0.00347769	0.156993	74	evm.TU.scaffold101.8125,evm.TU.scaffold1097.22517,evm.TU.scaffold112.8673,evm.TU.scaffold1128.22657,evm.TU.scaffold117.8843,evm.TU.scaffold117.8924,evm.TU.scaffold12.1156,evm.TU.scaffold12.1308,evm.TU.scaffold12.1327,evm.TU.scaffold12.1328,evm.TU.scaffold120.9088,evm.TU.scaffold125.9315,evm.TU.scaffold1265.23118,evm.TU.scaffold1275.23135,evm.TU.scaffold13.1372,evm.TU.scaffold132.9613,evm.TU.scaff…	evm.TU.scaffold101.8125,evm.TU.scaffold1097.22517,evm.TU.scaffold112.8673,evm.TU.scaffold1128.22657,evm.TU.scaffold117.8843,evm.TU.scaffold117.8924,evm.TU.scaffold12.1156,evm.TU.scaffold12.1308,evm.TU.scaffold12.1327,evm.TU.scaffold12.1328,evm.TU.scaffold120.9088,evm.TU.scaffold125.9315,evm.TU.scaffold1265.23118,evm.TU.scaffold1275.23135,evm.TU.scaffold13.1372,evm.TU.scaffold132.9613,evm.TU.scaff…
ko05033	Nicotine addiction	Human Diseases	25/3525	26/4730	1.29023	0.00464932	0.183648	25	evm.TU.scaffold1050.22325,evm.TU.scaffold1337.23318,evm.TU.scaffold137.9833,evm.TU.scaffold1409.23488,evm.TU.scaffold20.1988,evm.TU.scaffold234.12754,evm.TU.scaffold234.12789,evm.TU.scaffold243.13044,evm.TU.scaffold30.3025,evm.TU.scaffold31.3061,evm.TU.scaffold313.14545,evm.TU.scaffold314.14582,evm.TU.scaffold346.15124,evm.TU.scaffold346.15125,evm.TU.scaffold363.15621,evm.TU.scaffold366.15698,evm…	evm.TU.scaffold1050.22325,evm.TU.scaffold1337.23318,evm.TU.scaffold137.9833,evm.TU.scaffold1409.23488,evm.TU.scaffold20.1988,evm.TU.scaffold234.12754,evm.TU.scaffold234.12789,evm.TU.scaffold243.13044,evm.TU.scaffold30.3025,evm.TU.scaffold31.3061,evm.TU.scaffold313.14545,evm.TU.scaffold314.14582,evm.TU.scaffold346.15124,evm.TU.scaffold346.15125,evm.TU.scaffold363.15621,evm.TU.scaffold366.15698,evm…
ko04070	Phosphatidylinositol signaling system	Environmental Information Processing	44/3525	49/4730	1.20492	0.00679294	0.21814	44	evm.TU.scaffold1019.22197,evm.TU.scaffold102.8310,evm.TU.scaffold102.8311,evm.TU.scaffold103.8383,evm.TU.scaffold1038.22267,evm.TU.scaffold106.8468,evm.TU.scaffold111.8657,evm.TU.scaffold1128.22657,evm.TU.scaffold117.8924,evm.TU.scaffold12.1298,evm.TU.scaffold120.9076,evm.TU.scaffold125.9315,evm.TU.scaffold1275.23135,evm.TU.scaffold142.10032,evm.TU.scaffold142.10034,evm.TU.scaffold144.10085,evm.T…	evm.TU.scaffold1019.22197,evm.TU.scaffold102.8310,evm.TU.scaffold102.8311,evm.TU.scaffold103.8383,evm.TU.scaffold1038.22267,evm.TU.scaffold106.8468,evm.TU.scaffold111.8657,evm.TU.scaffold1128.22657,evm.TU.scaffold117.8924,evm.TU.scaffold12.1298,evm.TU.scaffold120.9076,evm.TU.scaffold125.9315,evm.TU.scaffold1275.23135,evm.TU.scaffold142.10032,evm.TU.scaffold142.10034,evm.TU.scaffold144.10085,evm.T…
ko04713	Circadian entrainment	Organismal Systems	61/3525	70/4730	1.16932	0.00751925	0.21814	61	evm.TU.scaffold1.26,evm.TU.scaffold105.8429,evm.TU.scaffold1128.22657,evm.TU.scaffold116.8795,evm.TU.scaffold12.1192,evm.TU.scaffold12.1215,evm.TU.scaffold131.9591,evm.TU.scaffold137.9833,evm.TU.scaffold14.1506,evm.TU.scaffold142.10032,evm.TU.scaffold16.1710,evm.TU.scaffold177.11084,evm.TU.scaffold18.1794,evm.TU.scaffold192.11553,evm.TU.scaffold2.168,evm.TU.scaffold20.1984,evm.TU.scaffold20.2054,…	evm.TU.scaffold1.26,evm.TU.scaffold105.8429,evm.TU.scaffold1128.22657,evm.TU.scaffold116.8795,evm.TU.scaffold12.1192,evm.TU.scaffold12.1215,evm.TU.scaffold131.9591,evm.TU.scaffold137.9833,evm.TU.scaffold14.1506,evm.TU.scaffold142.10032,evm.TU.scaffold16.1710,evm.TU.scaffold177.11084,evm.TU.scaffold18.1794,evm.TU.scaffold192.11553,evm.TU.scaffold2.168,evm.TU.scaffold20.1984,evm.TU.scaffold20.2054,…
ko05217	Basal cell carcinoma	Human Diseases	38/3525	42/4730	1.21405	0.00887802	0.21814	38	evm.TU.scaffold101.8201,evm.TU.scaffold1109.22573,evm.TU.scaffold1109.22574,evm.TU.scaffold1176.22807,evm.TU.scaffold125.9305,evm.TU.scaffold125.9306,evm.TU.scaffold125.9311,evm.TU.scaffold132.9613,evm.TU.scaffold145.10131,evm.TU.scaffold172.10989,evm.TU.scaffold181.11247,evm.TU.scaffold190.11481,evm.TU.scaffold204.11889,evm.TU.scaffold226.12455,evm.TU.scaffold235.12875,evm.TU.scaffold237.12934,e…	evm.TU.scaffold101.8201,evm.TU.scaffold1109.22573,evm.TU.scaffold1109.22574,evm.TU.scaffold1176.22807,evm.TU.scaffold125.9305,evm.TU.scaffold125.9306,evm.TU.scaffold125.9311,evm.TU.scaffold132.9613,evm.TU.scaffold145.10131,evm.TU.scaffold172.10989,evm.TU.scaffold181.11247,evm.TU.scaffold190.11481,evm.TU.scaffold204.11889,evm.TU.scaffold226.12455,evm.TU.scaffold235.12875,evm.TU.scaffold237.12934,e…
ko04931	Insulin resistance	Human Diseases	60/3525	69/4730	1.16682	0.0088989	0.21814	60	evm.TU.scaffold101.8206,evm.TU.scaffold101.8268,evm.TU.scaffold102.8294,evm.TU.scaffold102.8312,evm.TU.scaffold1072.22399,evm.TU.scaffold113.8719,evm.TU.scaffold117.8907,evm.TU.scaffold117.8924,evm.TU.scaffold12.1188,evm.TU.scaffold120.9089,evm.TU.scaffold1201.22891,evm.TU.scaffold125.9307,evm.TU.scaffold13.1372,evm.TU.scaffold147.10172,evm.TU.scaffold1475.23625,evm.TU.scaffold148.10328,evm.TU.sc…	evm.TU.scaffold101.8206,evm.TU.scaffold101.8268,evm.TU.scaffold102.8294,evm.TU.scaffold102.8312,evm.TU.scaffold1072.22399,evm.TU.scaffold113.8719,evm.TU.scaffold117.8907,evm.TU.scaffold117.8924,evm.TU.scaffold12.1188,evm.TU.scaffold120.9089,evm.TU.scaffold1201.22891,evm.TU.scaffold125.9307,evm.TU.scaffold13.1372,evm.TU.scaffold147.10172,evm.TU.scaffold1475.23625,evm.TU.scaffold148.10328,evm.TU.sc…
ko00514	Other types of O-glycan biosynthesis	Metabolism	16/3525	16/4730	1.34184	0.00897411	0.21814	16	evm.TU.scaffold107.8488,evm.TU.scaffold117.8910,evm.TU.scaffold124.9253,evm.TU.scaffold139.9919,evm.TU.scaffold14.1481,evm.TU.scaffold150.10386,evm.TU.scaffold160.10648,evm.TU.scaffold204.11847,evm.TU.scaffold234.12852,evm.TU.scaffold275.13852,evm.TU.scaffold364.15645,evm.TU.scaffold422.16871,evm.TU.scaffold422.16874,evm.TU.scaffold454.17336,evm.TU.scaffold49.4367,evm.TU.scaffold649.19756,evm.TU.…	evm.TU.scaffold107.8488,evm.TU.scaffold117.8910,evm.TU.scaffold124.9253,evm.TU.scaffold139.9919,evm.TU.scaffold14.1481,evm.TU.scaffold150.10386,evm.TU.scaffold160.10648,evm.TU.scaffold204.11847,evm.TU.scaffold234.12852,evm.TU.scaffold275.13852,evm.TU.scaffold364.15645,evm.TU.scaffold422.16871,evm.TU.scaffold422.16874,evm.TU.scaffold454.17336,evm.TU.scaffold49.4367,evm.TU.scaffold649.19756,evm.TU.…
ko04724	Glutamatergic synapse	Organismal Systems	67/3525	78/4730	1.15261	0.0107959	0.232514	67	evm.TU.scaffold1.26,evm.TU.scaffold101.8272,evm.TU.scaffold107.8503,evm.TU.scaffold1128.22657,evm.TU.scaffold117.8835,evm.TU.scaffold117.8955,evm.TU.scaffold128.9446,evm.TU.scaffold129.9464,evm.TU.scaffold131.9591,evm.TU.scaffold136.9814,evm.TU.scaffold137.9833,evm.TU.scaffold142.10032,evm.TU.scaffold1570.23781,evm.TU.scaffold177.11084,evm.TU.scaffold190.11454,evm.TU.scaffold20.1984,evm.TU.scaffo…	evm.TU.scaffold1.26,evm.TU.scaffold101.8272,evm.TU.scaffold107.8503,evm.TU.scaffold1128.22657,evm.TU.scaffold117.8835,evm.TU.scaffold117.8955,evm.TU.scaffold128.9446,evm.TU.scaffold129.9464,evm.TU.scaffold131.9591,evm.TU.scaffold136.9814,evm.TU.scaffold137.9833,evm.TU.scaffold142.10032,evm.TU.scaffold1570.23781,evm.TU.scaffold177.11084,evm.TU.scaffold190.11454,evm.TU.scaffold20.1984,evm.TU.scaffo…
ko04080	Neuroactive ligand-receptor interaction	Environmental Information Processing	177/3525	218/4730	1.08948	0.0110371	0.232514	177	evm.TU.scaffold1.73,evm.TU.scaffold1.74,evm.TU.scaffold1.75,evm.TU.scaffold1.88,evm.TU.scaffold1003.22118,evm.TU.scaffold101.8119,evm.TU.scaffold101.8168,evm.TU.scaffold102.8303,evm.TU.scaffold102.8309,evm.TU.scaffold1038.22268,evm.TU.scaffold1039.22274,evm.TU.scaffold1050.22325,evm.TU.scaffold10551.24867,evm.TU.scaffold108.8545,evm.TU.scaffold1088.22455,evm.TU.scaffold1093.22480,evm.TU.scaffold1…	evm.TU.scaffold1.73,evm.TU.scaffold1.74,evm.TU.scaffold1.75,evm.TU.scaffold1.88,evm.TU.scaffold1003.22118,evm.TU.scaffold101.8119,evm.TU.scaffold101.8168,evm.TU.scaffold102.8303,evm.TU.scaffold102.8309,evm.TU.scaffold1038.22268,evm.TU.scaffold1039.22274,evm.TU.scaffold1050.22325,evm.TU.scaffold10551.24867,evm.TU.scaffold108.8545,evm.TU.scaffold1088.22455,evm.TU.scaffold1093.22480,evm.TU.scaffold1…
ko04742	Taste transduction	Organismal Systems	36/3525	40/4730	1.20766	0.0133389	0.247711	36	evm.TU.scaffold104.8415,evm.TU.scaffold121.9167,evm.TU.scaffold133.9642,evm.TU.scaffold133.9645,evm.TU.scaffold1409.23488,evm.TU.scaffold142.10032,evm.TU.scaffold15.1592,evm.TU.scaffold16.1719,evm.TU.scaffold183.11328,evm.TU.scaffold20.2043,evm.TU.scaffold203.11805,evm.TU.scaffold204.11891,evm.TU.scaffold204.11892,evm.TU.scaffold206.11940,evm.TU.scaffold219.12288,evm.TU.scaffold231.12616,evm.TU.s…	evm.TU.scaffold104.8415,evm.TU.scaffold121.9167,evm.TU.scaffold133.9642,evm.TU.scaffold133.9645,evm.TU.scaffold1409.23488,evm.TU.scaffold142.10032,evm.TU.scaffold15.1592,evm.TU.scaffold16.1719,evm.TU.scaffold183.11328,evm.TU.scaffold20.2043,evm.TU.scaffold203.11805,evm.TU.scaffold204.11891,evm.TU.scaffold204.11892,evm.TU.scaffold206.11940,evm.TU.scaffold219.12288,evm.TU.scaffold231.12616,evm.TU.s…
ko04020	Calcium signaling pathway	Environmental Information Processing	111/3525	134/4730	1.11153	0.013654	0.247711	111	evm.TU.scaffold1050.22325,evm.TU.scaffold107.8505,evm.TU.scaffold108.8545,evm.TU.scaffold1093.22480,evm.TU.scaffold110.8589,evm.TU.scaffold1113.22599,evm.TU.scaffold1123.22630,evm.TU.scaffold1128.22657,evm.TU.scaffold113.8711,evm.TU.scaffold12.1215,evm.TU.scaffold12.1317,evm.TU.scaffold120.9061,evm.TU.scaffold125.9315,evm.TU.scaffold127.9378,evm.TU.scaffold1275.23135,evm.TU.scaffold13.1351,evm.TU…	evm.TU.scaffold1050.22325,evm.TU.scaffold107.8505,evm.TU.scaffold108.8545,evm.TU.scaffold1093.22480,evm.TU.scaffold110.8589,evm.TU.scaffold1113.22599,evm.TU.scaffold1123.22630,evm.TU.scaffold1128.22657,evm.TU.scaffold113.8711,evm.TU.scaffold12.1215,evm.TU.scaffold12.1317,evm.TU.scaffold120.9061,evm.TU.scaffold125.9315,evm.TU.scaffold127.9378,evm.TU.scaffold1275.23135,evm.TU.scaffold13.1351,evm.TU…
ko04211	Longevity regulating pathway	Organismal Systems	57/3525	66/4730	1.15887	0.0145854	0.247711	57	evm.TU.scaffold102.8306,evm.TU.scaffold102.8312,evm.TU.scaffold113.8719,evm.TU.scaffold117.8924,evm.TU.scaffold120.9089,evm.TU.scaffold123.9228,evm.TU.scaffold125.9307,evm.TU.scaffold127.9377,evm.TU.scaffold13.1372,evm.TU.scaffold131.9591,evm.TU.scaffold135.9737,evm.TU.scaffold135.9740,evm.TU.scaffold147.10172,evm.TU.scaffold148.10328,evm.TU.scaffold165.10771,evm.TU.scaffold18.1833,evm.TU.scaffol…	evm.TU.scaffold102.8306,evm.TU.scaffold102.8312,evm.TU.scaffold113.8719,evm.TU.scaffold117.8924,evm.TU.scaffold120.9089,evm.TU.scaffold123.9228,evm.TU.scaffold125.9307,evm.TU.scaffold127.9377,evm.TU.scaffold13.1372,evm.TU.scaffold131.9591,evm.TU.scaffold135.9737,evm.TU.scaffold135.9740,evm.TU.scaffold147.10172,evm.TU.scaffold148.10328,evm.TU.scaffold165.10771,evm.TU.scaffold18.1833,evm.TU.scaffol…
ko00511	Other glycan degradation	Metabolism	14/3525	14/4730	1.34184	0.0161923	0.247711	14	evm.TU.scaffold1003.22120,evm.TU.scaffold113.8718,evm.TU.scaffold148.10290,evm.TU.scaffold1551.23758,evm.TU.scaffold170.10953,evm.TU.scaffold19.1956,evm.TU.scaffold1975.24162,evm.TU.scaffold216.12149,evm.TU.scaffold216.12150,evm.TU.scaffold279.13985,evm.TU.scaffold302.14375,evm.TU.scaffold314.14607,evm.TU.scaffold367.15764,evm.TU.scaffold403.16482,evm.TU.scaffold481.17753,evm.TU.scaffold49.4430,e…	evm.TU.scaffold1003.22120,evm.TU.scaffold113.8718,evm.TU.scaffold148.10290,evm.TU.scaffold1551.23758,evm.TU.scaffold170.10953,evm.TU.scaffold19.1956,evm.TU.scaffold1975.24162,evm.TU.scaffold216.12149,evm.TU.scaffold216.12150,evm.TU.scaffold279.13985,evm.TU.scaffold302.14375,evm.TU.scaffold314.14607,evm.TU.scaffold367.15764,evm.TU.scaffold403.16482,evm.TU.scaffold481.17753,evm.TU.scaffold49.4430,e…
ko00562	Inositol phosphate metabolism	Metabolism	39/3525	44/4730	1.18936	0.017827	0.247711	39	evm.TU.scaffold101.8262,evm.TU.scaffold1019.22197,evm.TU.scaffold103.8383,evm.TU.scaffold1038.22267,evm.TU.scaffold111.8657,evm.TU.scaffold117.8939,evm.TU.scaffold12.1298,evm.TU.scaffold120.9076,evm.TU.scaffold125.9315,evm.TU.scaffold1275.23135,evm.TU.scaffold14.1530,evm.TU.scaffold144.10085,evm.TU.scaffold169.10851,evm.TU.scaffold170.10917,evm.TU.scaffold181.11225,evm.TU.scaffold191.11527,evm.TU…	evm.TU.scaffold101.8262,evm.TU.scaffold1019.22197,evm.TU.scaffold103.8383,evm.TU.scaffold1038.22267,evm.TU.scaffold111.8657,evm.TU.scaffold117.8939,evm.TU.scaffold12.1298,evm.TU.scaffold120.9076,evm.TU.scaffold125.9315,evm.TU.scaffold1275.23135,evm.TU.scaffold14.1530,evm.TU.scaffold144.10085,evm.TU.scaffold169.10851,evm.TU.scaffold170.10917,evm.TU.scaffold181.11225,evm.TU.scaffold191.11527,evm.TU…
ko04924	Renin secretion	Organismal Systems	39/3525	44/4730	1.18936	0.017827	0.247711	39	evm.TU.scaffold10.1001,evm.TU.scaffold10.999,evm.TU.scaffold1007.22146,evm.TU.scaffold1113.22599,evm.TU.scaffold127.9378,evm.TU.scaffold142.10032,evm.TU.scaffold145.10104,evm.TU.scaffold148.10336,evm.TU.scaffold18.1839,evm.TU.scaffold212.12044,evm.TU.scaffold212.12045,evm.TU.scaffold212.12046,evm.TU.scaffold219.12279,evm.TU.scaffold22.2170,evm.TU.scaffold230.12606,evm.TU.scaffold25.2531,evm.TU.sc…	evm.TU.scaffold10.1001,evm.TU.scaffold10.999,evm.TU.scaffold1007.22146,evm.TU.scaffold1113.22599,evm.TU.scaffold127.9378,evm.TU.scaffold142.10032,evm.TU.scaffold145.10104,evm.TU.scaffold148.10336,evm.TU.scaffold18.1839,evm.TU.scaffold212.12044,evm.TU.scaffold212.12045,evm.TU.scaffold212.12046,evm.TU.scaffold219.12279,evm.TU.scaffold22.2170,evm.TU.scaffold230.12606,evm.TU.scaffold25.2531,evm.TU.sc…
ko05031	Amphetamine addiction	Human Diseases	39/3525	44/4730	1.18936	0.017827	0.247711	39	evm.TU.scaffold102.8312,evm.TU.scaffold1128.22657,evm.TU.scaffold12.1312,evm.TU.scaffold120.9089,evm.TU.scaffold137.9833,evm.TU.scaffold14.1506,evm.TU.scaffold148.10328,evm.TU.scaffold182.11267,evm.TU.scaffold2.168,evm.TU.scaffold210.11984,evm.TU.scaffold234.12688,evm.TU.scaffold234.12754,evm.TU.scaffold25.2531,evm.TU.scaffold25.2532,evm.TU.scaffold25.2596,evm.TU.scaffold250.13273,evm.TU.scaffold…	evm.TU.scaffold102.8312,evm.TU.scaffold1128.22657,evm.TU.scaffold12.1312,evm.TU.scaffold120.9089,evm.TU.scaffold137.9833,evm.TU.scaffold14.1506,evm.TU.scaffold148.10328,evm.TU.scaffold182.11267,evm.TU.scaffold2.168,evm.TU.scaffold210.11984,evm.TU.scaffold234.12688,evm.TU.scaffold234.12754,evm.TU.scaffold25.2531,evm.TU.scaffold25.2532,evm.TU.scaffold25.2596,evm.TU.scaffold250.13273,evm.TU.scaffold…
ko04330	Notch signaling pathway	Environmental Information Processing	25/3525	27/4730	1.24245	0.0180296	0.247711	25	evm.TU.scaffold101.8125,evm.TU.scaffold11.1095,evm.TU.scaffold112.8673,evm.TU.scaffold117.8843,evm.TU.scaffold1292.23184,evm.TU.scaffold13.1364,evm.TU.scaffold14.1472,evm.TU.scaffold14.1548,evm.TU.scaffold14.1550,evm.TU.scaffold1752.24013,evm.TU.scaffold176.11053,evm.TU.scaffold18.1887,evm.TU.scaffold19.1922,evm.TU.scaffold193.11600,evm.TU.scaffold20.1997,evm.TU.scaffold204.11889,evm.TU.scaffold2…	evm.TU.scaffold101.8125,evm.TU.scaffold11.1095,evm.TU.scaffold112.8673,evm.TU.scaffold117.8843,evm.TU.scaffold1292.23184,evm.TU.scaffold13.1364,evm.TU.scaffold14.1472,evm.TU.scaffold14.1548,evm.TU.scaffold14.1550,evm.TU.scaffold1752.24013,evm.TU.scaffold176.11053,evm.TU.scaffold18.1887,evm.TU.scaffold19.1922,evm.TU.scaffold193.11600,evm.TU.scaffold20.1997,evm.TU.scaffold204.11889,evm.TU.scaffold2…
ko04976	Bile secretion	Organismal Systems	47/3525	54/4730	1.1679	0.0195594	0.257532	47	evm.TU.scaffold1063.22359,evm.TU.scaffold109.8587,evm.TU.scaffold1135.22679,evm.TU.scaffold12.1214,evm.TU.scaffold127.9405,evm.TU.scaffold131.9591,evm.TU.scaffold1461.23604,evm.TU.scaffold151.10423,evm.TU.scaffold1513.23693,evm.TU.scaffold16.1671,evm.TU.scaffold161.10673,evm.TU.scaffold18.1889,evm.TU.scaffold180.11181,evm.TU.scaffold182.11275,evm.TU.scaffold1967.24155,evm.TU.scaffold206.11925,evm…	evm.TU.scaffold1063.22359,evm.TU.scaffold109.8587,evm.TU.scaffold1135.22679,evm.TU.scaffold12.1214,evm.TU.scaffold127.9405,evm.TU.scaffold131.9591,evm.TU.scaffold1461.23604,evm.TU.scaffold151.10423,evm.TU.scaffold1513.23693,evm.TU.scaffold16.1671,evm.TU.scaffold161.10673,evm.TU.scaffold18.1889,evm.TU.scaffold180.11181,evm.TU.scaffold182.11275,evm.TU.scaffold1967.24155,evm.TU.scaffold206.11925,evm…
ko04971	Gastric acid secretion	Organismal Systems	42/3525	48/4730	1.17411	0.0225352	0.284844	42	evm.TU.scaffold105.8455,evm.TU.scaffold1128.22657,evm.TU.scaffold1135.22679,evm.TU.scaffold127.9405,evm.TU.scaffold131.9591,evm.TU.scaffold142.10032,evm.TU.scaffold1513.23693,evm.TU.scaffold180.11181,evm.TU.scaffold192.11554,evm.TU.scaffold2.168,evm.TU.scaffold206.11925,evm.TU.scaffold24.2365,evm.TU.scaffold250.13273,evm.TU.scaffold250.13275,evm.TU.scaffold269.13713,evm.TU.scaffold29.2760,evm.TU.…	evm.TU.scaffold105.8455,evm.TU.scaffold1128.22657,evm.TU.scaffold1135.22679,evm.TU.scaffold127.9405,evm.TU.scaffold131.9591,evm.TU.scaffold142.10032,evm.TU.scaffold1513.23693,evm.TU.scaffold180.11181,evm.TU.scaffold192.11554,evm.TU.scaffold2.168,evm.TU.scaffold206.11925,evm.TU.scaffold24.2365,evm.TU.scaffold250.13273,evm.TU.scaffold250.13275,evm.TU.scaffold269.13713,evm.TU.scaffold29.2760,evm.TU.…
ko04916	Melanogenesis	Organismal Systems	54/3525	63/4730	1.15015	0.0234798	0.285369	54	evm.TU.scaffold101.8125,evm.TU.scaffold101.8201,evm.TU.scaffold102.8312,evm.TU.scaffold108.8545,evm.TU.scaffold1109.22573,evm.TU.scaffold1109.22574,evm.TU.scaffold1128.22657,evm.TU.scaffold120.9088,evm.TU.scaffold120.9089,evm.TU.scaffold125.9305,evm.TU.scaffold125.9306,evm.TU.scaffold131.9591,evm.TU.scaffold145.10131,evm.TU.scaffold148.10328,evm.TU.scaffold156.10551,evm.TU.scaffold172.10989,evm.T…	evm.TU.scaffold101.8125,evm.TU.scaffold101.8201,evm.TU.scaffold102.8312,evm.TU.scaffold108.8545,evm.TU.scaffold1109.22573,evm.TU.scaffold1109.22574,evm.TU.scaffold1128.22657,evm.TU.scaffold120.9088,evm.TU.scaffold120.9089,evm.TU.scaffold125.9305,evm.TU.scaffold125.9306,evm.TU.scaffold131.9591,evm.TU.scaffold145.10131,evm.TU.scaffold148.10328,evm.TU.scaffold156.10551,evm.TU.scaffold172.10989,evm.T…
ko04750	Inflammatory mediator regulation of TRP channels	Organismal Systems	53/3525	62/4730	1.14706	0.0274016	0.3207	53	evm.TU.scaffold101.8256,evm.TU.scaffold1128.22657,evm.TU.scaffold116.8831,evm.TU.scaffold117.8924,evm.TU.scaffold12.1152,evm.TU.scaffold125.9282,evm.TU.scaffold1275.23135,evm.TU.scaffold1297.23199,evm.TU.scaffold13.1460,evm.TU.scaffold131.9591,evm.TU.scaffold133.9642,evm.TU.scaffold133.9645,evm.TU.scaffold142.10032,evm.TU.scaffold1475.23625,evm.TU.scaffold148.10237,evm.TU.scaffold157.10576,evm.TU…	evm.TU.scaffold101.8256,evm.TU.scaffold1128.22657,evm.TU.scaffold116.8831,evm.TU.scaffold117.8924,evm.TU.scaffold12.1152,evm.TU.scaffold125.9282,evm.TU.scaffold1275.23135,evm.TU.scaffold1297.23199,evm.TU.scaffold13.1460,evm.TU.scaffold131.9591,evm.TU.scaffold133.9642,evm.TU.scaffold133.9645,evm.TU.scaffold142.10032,evm.TU.scaffold1475.23625,evm.TU.scaffold148.10237,evm.TU.scaffold157.10576,evm.TU…
ko04022	cGMP-PKG signaling pathway	Environmental Information Processing	89/3525	108/4730	1.10578	0.0331206	0.356816	89	evm.TU.scaffold10.1001,evm.TU.scaffold10.1027,evm.TU.scaffold10.999,evm.TU.scaffold102.8312,evm.TU.scaffold108.8545,evm.TU.scaffold1113.22599,evm.TU.scaffold117.8960,evm.TU.scaffold120.9061,evm.TU.scaffold120.9088,evm.TU.scaffold120.9089,evm.TU.scaffold127.9378,evm.TU.scaffold127.9389,evm.TU.scaffold13.1372,evm.TU.scaffold131.9591,evm.TU.scaffold142.10032,evm.TU.scaffold145.10107,evm.TU.scaffold1…	evm.TU.scaffold10.1001,evm.TU.scaffold10.1027,evm.TU.scaffold10.999,evm.TU.scaffold102.8312,evm.TU.scaffold108.8545,evm.TU.scaffold1113.22599,evm.TU.scaffold117.8960,evm.TU.scaffold120.9061,evm.TU.scaffold120.9088,evm.TU.scaffold120.9089,evm.TU.scaffold127.9378,evm.TU.scaffold127.9389,evm.TU.scaffold13.1372,evm.TU.scaffold131.9591,evm.TU.scaffold142.10032,evm.TU.scaffold145.10107,evm.TU.scaffold1…
ko04514	Cell adhesion molecules (CAMs)	Environmental Information Processing	74/3525	89/4730	1.11569	0.0350068	0.356816	74	evm.TU.scaffold1018.22192,evm.TU.scaffold1077.22423,evm.TU.scaffold109.8586,evm.TU.scaffold11.1110,evm.TU.scaffold1195.22860,evm.TU.scaffold1195.22861,evm.TU.scaffold122.9208,evm.TU.scaffold130.9578,evm.TU.scaffold1356.23375,evm.TU.scaffold1376.23438,evm.TU.scaffold139.9897,evm.TU.scaffold139.9914,evm.TU.scaffold14.1463,evm.TU.scaffold14.1464,evm.TU.scaffold14.1466,evm.TU.scaffold14.1467,evm.TU.s…	evm.TU.scaffold1018.22192,evm.TU.scaffold1077.22423,evm.TU.scaffold109.8586,evm.TU.scaffold11.1110,evm.TU.scaffold1195.22860,evm.TU.scaffold1195.22861,evm.TU.scaffold122.9208,evm.TU.scaffold130.9578,evm.TU.scaffold1356.23375,evm.TU.scaffold1376.23438,evm.TU.scaffold139.9897,evm.TU.scaffold139.9914,evm.TU.scaffold14.1463,evm.TU.scaffold14.1464,evm.TU.scaffold14.1466,evm.TU.scaffold14.1467,evm.TU.s…
ko04910	Insulin signaling pathway	Organismal Systems	70/3525	84/4730	1.1182	0.0364416	0.356816	70	evm.TU.scaffold10.1001,evm.TU.scaffold10.999,evm.TU.scaffold1072.22399,evm.TU.scaffold1113.22602,evm.TU.scaffold1123.22630,evm.TU.scaffold117.8924,evm.TU.scaffold12.1188,evm.TU.scaffold120.9034,evm.TU.scaffold120.9088,evm.TU.scaffold120.9154,evm.TU.scaffold1201.22891,evm.TU.scaffold125.9307,evm.TU.scaffold127.9377,evm.TU.scaffold13.1372,evm.TU.scaffold133.9684,evm.TU.scaffold147.10172,evm.TU.scaf…	evm.TU.scaffold10.1001,evm.TU.scaffold10.999,evm.TU.scaffold1072.22399,evm.TU.scaffold1113.22602,evm.TU.scaffold1123.22630,evm.TU.scaffold117.8924,evm.TU.scaffold12.1188,evm.TU.scaffold120.9034,evm.TU.scaffold120.9088,evm.TU.scaffold120.9154,evm.TU.scaffold1201.22891,evm.TU.scaffold125.9307,evm.TU.scaffold127.9377,evm.TU.scaffold13.1372,evm.TU.scaffold133.9684,evm.TU.scaffold147.10172,evm.TU.scaf…
ko01210	2-Oxocarboxylic acid metabolism	Metabolism	11/3525	11/4730	1.34184	0.0392237	0.356816	11	evm.TU.scaffold101.8132,evm.TU.scaffold129.9493,evm.TU.scaffold234.12770,evm.TU.scaffold360.15493,evm.TU.scaffold41.3691,evm.TU.scaffold42.3820,evm.TU.scaffold520.18287,evm.TU.scaffold520.18288,evm.TU.scaffold531.18380,evm.TU.scaffold564.18803,evm.TU.scaffold59.5880,evm.TU.scaffold593.19158,evm.TU.scaffold626.19573,evm.TU.scaffold683.20031	evm.TU.scaffold101.8132,evm.TU.scaffold129.9493,evm.TU.scaffold234.12770,evm.TU.scaffold360.15493,evm.TU.scaffold41.3691,evm.TU.scaffold42.3820,evm.TU.scaffold520.18287,evm.TU.scaffold520.18288,evm.TU.scaffold531.18380,evm.TU.scaffold564.18803,evm.TU.scaffold59.5880,evm.TU.scaffold593.19158,evm.TU.scaffold626.19573,evm.TU.scaffold683.20031
ko04915	Estrogen signaling pathway	Organismal Systems	54/3525	64/4730	1.13218	0.0418609	0.356816	54	evm.TU.scaffold1.26,evm.TU.scaffold102.8312,evm.TU.scaffold117.8924,evm.TU.scaffold120.9088,evm.TU.scaffold120.9089,evm.TU.scaffold121.9167,evm.TU.scaffold13.1372,evm.TU.scaffold13.1419,evm.TU.scaffold131.9591,evm.TU.scaffold14.1506,evm.TU.scaffold142.10032,evm.TU.scaffold148.10306,evm.TU.scaffold148.10328,evm.TU.scaffold155.10519,evm.TU.scaffold16.1650,evm.TU.scaffold192.11553,evm.TU.scaffold20.…	evm.TU.scaffold1.26,evm.TU.scaffold102.8312,evm.TU.scaffold117.8924,evm.TU.scaffold120.9088,evm.TU.scaffold120.9089,evm.TU.scaffold121.9167,evm.TU.scaffold13.1372,evm.TU.scaffold13.1419,evm.TU.scaffold131.9591,evm.TU.scaffold14.1506,evm.TU.scaffold142.10032,evm.TU.scaffold148.10306,evm.TU.scaffold148.10328,evm.TU.scaffold155.10519,evm.TU.scaffold16.1650,evm.TU.scaffold192.11553,evm.TU.scaffold20.…
ko05206	MicroRNAs in cancer	Human Diseases	101/3525	124/4730	1.09295	0.0422524	0.356816	101	evm.TU.scaffold101.8125,evm.TU.scaffold105.8429,evm.TU.scaffold108.8537,evm.TU.scaffold1093.22481,evm.TU.scaffold11.1079,evm.TU.scaffold1109.22574,evm.TU.scaffold1122.22626,evm.TU.scaffold1128.22657,evm.TU.scaffold113.8719,evm.TU.scaffold117.8843,evm.TU.scaffold12.1169,evm.TU.scaffold12.1253,evm.TU.scaffold12.1317,evm.TU.scaffold120.9088,evm.TU.scaffold1201.22883,evm.TU.scaffold124.9265,evm.TU.sc…	evm.TU.scaffold101.8125,evm.TU.scaffold105.8429,evm.TU.scaffold108.8537,evm.TU.scaffold1093.22481,evm.TU.scaffold11.1079,evm.TU.scaffold1109.22574,evm.TU.scaffold1122.22626,evm.TU.scaffold1128.22657,evm.TU.scaffold113.8719,evm.TU.scaffold117.8843,evm.TU.scaffold12.1169,evm.TU.scaffold12.1253,evm.TU.scaffold12.1317,evm.TU.scaffold120.9088,evm.TU.scaffold1201.22883,evm.TU.scaffold124.9265,evm.TU.sc…
ko04930	Type II diabetes mellitus	Human Diseases	30/3525	34/4730	1.18398	0.0427201	0.356816	30	evm.TU.scaffold107.8505,evm.TU.scaffold117.8924,evm.TU.scaffold12.1215,evm.TU.scaffold147.10172,evm.TU.scaffold1475.23625,evm.TU.scaffold148.10285,evm.TU.scaffold2.113,evm.TU.scaffold2.114,evm.TU.scaffold20.1989,evm.TU.scaffold20.2070,evm.TU.scaffold203.11826,evm.TU.scaffold22.2240,evm.TU.scaffold220.12342,evm.TU.scaffold24.2389,evm.TU.scaffold248.13133,evm.TU.scaffold25.2531,evm.TU.scaffold25.25…	evm.TU.scaffold107.8505,evm.TU.scaffold117.8924,evm.TU.scaffold12.1215,evm.TU.scaffold147.10172,evm.TU.scaffold1475.23625,evm.TU.scaffold148.10285,evm.TU.scaffold2.113,evm.TU.scaffold2.114,evm.TU.scaffold20.1989,evm.TU.scaffold20.2070,evm.TU.scaffold203.11826,evm.TU.scaffold22.2240,evm.TU.scaffold220.12342,evm.TU.scaffold24.2389,evm.TU.scaffold248.13133,evm.TU.scaffold25.2531,evm.TU.scaffold25.25…
ko04072	Phospholipase D signaling pathway	Environmental Information Processing	76/3525	92/4730	1.10848	0.0428768	0.356816	76	evm.TU.scaffold102.8310,evm.TU.scaffold102.8311,evm.TU.scaffold11.1108,evm.TU.scaffold110.8589,evm.TU.scaffold1168.22781,evm.TU.scaffold117.8924,evm.TU.scaffold117.8973,evm.TU.scaffold120.9076,evm.TU.scaffold120.9088,evm.TU.scaffold120.9147,evm.TU.scaffold125.9327,evm.TU.scaffold1275.23135,evm.TU.scaffold13.1351,evm.TU.scaffold13.1352,evm.TU.scaffold13.1354,evm.TU.scaffold13.1372,evm.TU.scaffold1…	evm.TU.scaffold102.8310,evm.TU.scaffold102.8311,evm.TU.scaffold11.1108,evm.TU.scaffold110.8589,evm.TU.scaffold1168.22781,evm.TU.scaffold117.8924,evm.TU.scaffold117.8973,evm.TU.scaffold120.9076,evm.TU.scaffold120.9088,evm.TU.scaffold120.9147,evm.TU.scaffold125.9327,evm.TU.scaffold1275.23135,evm.TU.scaffold13.1351,evm.TU.scaffold13.1352,evm.TU.scaffold13.1354,evm.TU.scaffold13.1372,evm.TU.scaffold1…
ko04540	Gap junction	Cellular Processes	50/3525	59/4730	1.13716	0.0429675	0.356816	50	evm.TU.scaffold1128.22657,evm.TU.scaffold12.1169,evm.TU.scaffold120.9061,evm.TU.scaffold120.9088,evm.TU.scaffold120.9146,evm.TU.scaffold125.9288,evm.TU.scaffold125.9289,evm.TU.scaffold131.9591,evm.TU.scaffold132.9636,evm.TU.scaffold142.10032,evm.TU.scaffold1523.23712,evm.TU.scaffold156.10549,evm.TU.scaffold1570.23781,evm.TU.scaffold182.11267,evm.TU.scaffold219.12279,evm.TU.scaffold22.2203,evm.TU.…	evm.TU.scaffold1128.22657,evm.TU.scaffold12.1169,evm.TU.scaffold120.9061,evm.TU.scaffold120.9088,evm.TU.scaffold120.9146,evm.TU.scaffold125.9288,evm.TU.scaffold125.9289,evm.TU.scaffold131.9591,evm.TU.scaffold132.9636,evm.TU.scaffold142.10032,evm.TU.scaffold1523.23712,evm.TU.scaffold156.10549,evm.TU.scaffold1570.23781,evm.TU.scaffold182.11267,evm.TU.scaffold219.12279,evm.TU.scaffold22.2203,evm.TU.…
ko04727	GABAergic synapse	Organismal Systems	50/3525	59/4730	1.13716	0.0429675	0.356816	50	evm.TU.scaffold107.8503,evm.TU.scaffold11.1123,evm.TU.scaffold1113.22599,evm.TU.scaffold1128.22657,evm.TU.scaffold121.9167,evm.TU.scaffold131.9591,evm.TU.scaffold1337.23318,evm.TU.scaffold1409.23488,evm.TU.scaffold177.11084,evm.TU.scaffold181.11245,evm.TU.scaffold20.1984,evm.TU.scaffold20.1988,evm.TU.scaffold24.2393,evm.TU.scaffold243.13044,evm.TU.scaffold25.2531,evm.TU.scaffold25.2532,evm.TU.sca…	evm.TU.scaffold107.8503,evm.TU.scaffold11.1123,evm.TU.scaffold1113.22599,evm.TU.scaffold1128.22657,evm.TU.scaffold121.9167,evm.TU.scaffold131.9591,evm.TU.scaffold1337.23318,evm.TU.scaffold1409.23488,evm.TU.scaffold177.11084,evm.TU.scaffold181.11245,evm.TU.scaffold20.1984,evm.TU.scaffold20.1988,evm.TU.scaffold24.2393,evm.TU.scaffold243.13044,evm.TU.scaffold25.2531,evm.TU.scaffold25.2532,evm.TU.sca…
ko05414	Dilated cardiomyopathy	Human Diseases	65/3525	78/4730	1.1182	0.0431439	0.356816	65	evm.TU.scaffold1.5,evm.TU.scaffold1.55,evm.TU.scaffold102.8292,evm.TU.scaffold1030.22241,evm.TU.scaffold11.1059,evm.TU.scaffold11.1110,evm.TU.scaffold1113.22599,evm.TU.scaffold1128.22654,evm.TU.scaffold1128.22655,evm.TU.scaffold114.8748,evm.TU.scaffold115.8763,evm.TU.scaffold115.8765,evm.TU.scaffold12.1229,evm.TU.scaffold12.1234,evm.TU.scaffold12.1303,evm.TU.scaffold1244.23055,evm.TU.scaffold125.…	evm.TU.scaffold1.5,evm.TU.scaffold1.55,evm.TU.scaffold102.8292,evm.TU.scaffold1030.22241,evm.TU.scaffold11.1059,evm.TU.scaffold11.1110,evm.TU.scaffold1113.22599,evm.TU.scaffold1128.22654,evm.TU.scaffold1128.22655,evm.TU.scaffold114.8748,evm.TU.scaffold115.8763,evm.TU.scaffold115.8765,evm.TU.scaffold12.1229,evm.TU.scaffold12.1234,evm.TU.scaffold12.1303,evm.TU.scaffold1244.23055,evm.TU.scaffold125.…
ko05224	Breast cancer	Human Diseases	79/3525	96/4730	1.10423	0.0460249	0.356816	79	evm.TU.scaffold101.8201,evm.TU.scaffold1109.22573,evm.TU.scaffold1109.22574,evm.TU.scaffold117.8843,evm.TU.scaffold117.8924,evm.TU.scaffold12.1317,evm.TU.scaffold120.9088,evm.TU.scaffold1201.22883,evm.TU.scaffold122.9212,evm.TU.scaffold124.9247,evm.TU.scaffold125.9305,evm.TU.scaffold125.9306,evm.TU.scaffold127.9368,evm.TU.scaffold13.1364,evm.TU.scaffold13.1372,evm.TU.scaffold137.9848,evm.TU.scaff…	evm.TU.scaffold101.8201,evm.TU.scaffold1109.22573,evm.TU.scaffold1109.22574,evm.TU.scaffold117.8843,evm.TU.scaffold117.8924,evm.TU.scaffold12.1317,evm.TU.scaffold120.9088,evm.TU.scaffold1201.22883,evm.TU.scaffold122.9212,evm.TU.scaffold124.9247,evm.TU.scaffold125.9305,evm.TU.scaffold125.9306,evm.TU.scaffold127.9368,evm.TU.scaffold13.1364,evm.TU.scaffold13.1372,evm.TU.scaffold137.9848,evm.TU.scaff…
ko04810	Regulation of actin cytoskeleton	Cellular Processes	114/3525	141/4730	1.0849	0.0462064	0.356816	114	evm.TU.scaffold1.55,evm.TU.scaffold102.8303,evm.TU.scaffold102.8309,evm.TU.scaffold1038.22267,evm.TU.scaffold107.8490,evm.TU.scaffold1091.22473,evm.TU.scaffold11.1110,evm.TU.scaffold1101.22529,evm.TU.scaffold114.8753,evm.TU.scaffold117.8924,evm.TU.scaffold12.1234,evm.TU.scaffold12.1298,evm.TU.scaffold120.9076,evm.TU.scaffold120.9088,evm.TU.scaffold120.9156,evm.TU.scaffold122.9212,evm.TU.scaffold1…	evm.TU.scaffold1.55,evm.TU.scaffold102.8303,evm.TU.scaffold102.8309,evm.TU.scaffold1038.22267,evm.TU.scaffold107.8490,evm.TU.scaffold1091.22473,evm.TU.scaffold11.1110,evm.TU.scaffold1101.22529,evm.TU.scaffold114.8753,evm.TU.scaffold117.8924,evm.TU.scaffold12.1234,evm.TU.scaffold12.1298,evm.TU.scaffold120.9076,evm.TU.scaffold120.9088,evm.TU.scaffold120.9156,evm.TU.scaffold122.9212,evm.TU.scaffold1…
ko05412	Arrhythmogenic right ventricular cardiomyopathy (ARVC)	Human Diseases	53/3525	63/4730	1.12885	0.0481873	0.356816	53	evm.TU.scaffold1.5,evm.TU.scaffold1.55,evm.TU.scaffold11.1110,evm.TU.scaffold1113.22599,evm.TU.scaffold1128.22654,evm.TU.scaffold1128.22655,evm.TU.scaffold115.8763,evm.TU.scaffold115.8765,evm.TU.scaffold12.1229,evm.TU.scaffold12.1234,evm.TU.scaffold12.1303,evm.TU.scaffold1244.23055,evm.TU.scaffold125.9284,evm.TU.scaffold144.10088,evm.TU.scaffold148.10267,evm.TU.scaffold22.2213,evm.TU.scaffold25.2…	evm.TU.scaffold1.5,evm.TU.scaffold1.55,evm.TU.scaffold11.1110,evm.TU.scaffold1113.22599,evm.TU.scaffold1128.22654,evm.TU.scaffold1128.22655,evm.TU.scaffold115.8763,evm.TU.scaffold115.8765,evm.TU.scaffold12.1229,evm.TU.scaffold12.1234,evm.TU.scaffold12.1303,evm.TU.scaffold1244.23055,evm.TU.scaffold125.9284,evm.TU.scaffold144.10088,evm.TU.scaffold148.10267,evm.TU.scaffold22.2213,evm.TU.scaffold25.2…
ko00970	Aminoacyl-tRNA biosynthesis	Genetic Information Processing	25/3525	28/4730	1.19807	0.048833	0.356816	25	evm.TU.scaffold1088.22452,evm.TU.scaffold1168.22779,evm.TU.scaffold135.9760,evm.TU.scaffold136.9783,evm.TU.scaffold149.10362,evm.TU.scaffold154.10490,evm.TU.scaffold16.1644,evm.TU.scaffold166.10799,evm.TU.scaffold166.10801,evm.TU.scaffold22.2173,evm.TU.scaffold254.13347,evm.TU.scaffold259.13480,evm.TU.scaffold265.13612,evm.TU.scaffold265.13613,evm.TU.scaffold27.2673,evm.TU.scaffold274.13807,evm.T…	evm.TU.scaffold1088.22452,evm.TU.scaffold1168.22779,evm.TU.scaffold135.9760,evm.TU.scaffold136.9783,evm.TU.scaffold149.10362,evm.TU.scaffold154.10490,evm.TU.scaffold16.1644,evm.TU.scaffold166.10799,evm.TU.scaffold166.10801,evm.TU.scaffold22.2173,evm.TU.scaffold254.13347,evm.TU.scaffold259.13480,evm.TU.scaffold265.13612,evm.TU.scaffold265.13613,evm.TU.scaffold27.2673,evm.TU.scaffold274.13807,evm.T…
ko04728	Dopaminergic synapse	Organismal Systems	64/3525	77/4730	1.1153	0.0490526	0.356816	64	evm.TU.scaffold1.26,evm.TU.scaffold10.1010,evm.TU.scaffold101.8256,evm.TU.scaffold102.8312,evm.TU.scaffold111.8647,evm.TU.scaffold1128.22657,evm.TU.scaffold12.1312,evm.TU.scaffold120.9089,evm.TU.scaffold13.1372,evm.TU.scaffold13.1424,evm.TU.scaffold137.9833,evm.TU.scaffold14.1506,evm.TU.scaffold142.10032,evm.TU.scaffold1460.23591,evm.TU.scaffold1473.23616,evm.TU.scaffold1475.23625,evm.TU.scaffold…	evm.TU.scaffold1.26,evm.TU.scaffold10.1010,evm.TU.scaffold101.8256,evm.TU.scaffold102.8312,evm.TU.scaffold111.8647,evm.TU.scaffold1128.22657,evm.TU.scaffold12.1312,evm.TU.scaffold120.9089,evm.TU.scaffold13.1372,evm.TU.scaffold13.1424,evm.TU.scaffold137.9833,evm.TU.scaffold14.1506,evm.TU.scaffold142.10032,evm.TU.scaffold1460.23591,evm.TU.scaffold1473.23616,evm.TU.scaffold1475.23625,evm.TU.scaffold…
ko05032	Morphine addiction	Human Diseases	49/3525	58/4730	1.13363	0.0496833	0.356816	49	evm.TU.scaffold1.26,evm.TU.scaffold10.1001,evm.TU.scaffold10.999,evm.TU.scaffold11.1065,evm.TU.scaffold1128.22657,evm.TU.scaffold117.8929,evm.TU.scaffold121.9167,evm.TU.scaffold128.9446,evm.TU.scaffold129.9470,evm.TU.scaffold131.9591,evm.TU.scaffold1337.23318,evm.TU.scaffold1409.23488,evm.TU.scaffold170.10923,evm.TU.scaffold177.11084,evm.TU.scaffold182.11267,evm.TU.scaffold182.11288,evm.TU.scaffo…	evm.TU.scaffold1.26,evm.TU.scaffold10.1001,evm.TU.scaffold10.999,evm.TU.scaffold11.1065,evm.TU.scaffold1128.22657,evm.TU.scaffold117.8929,evm.TU.scaffold121.9167,evm.TU.scaffold128.9446,evm.TU.scaffold129.9470,evm.TU.scaffold131.9591,evm.TU.scaffold1337.23318,evm.TU.scaffold1409.23488,evm.TU.scaffold170.10923,evm.TU.scaffold177.11084,evm.TU.scaffold182.11267,evm.TU.scaffold182.11288,evm.TU.scaffo…
