# Supplementary figures and images for: Identification of Potential miRNA–mRNA Regulatory Network Associated with Growth and Development of Hair Follicles in Forest Musk Deer
Source: MDPI journal article supplement (doi:10.3390/ani13243869), 2023-12-15

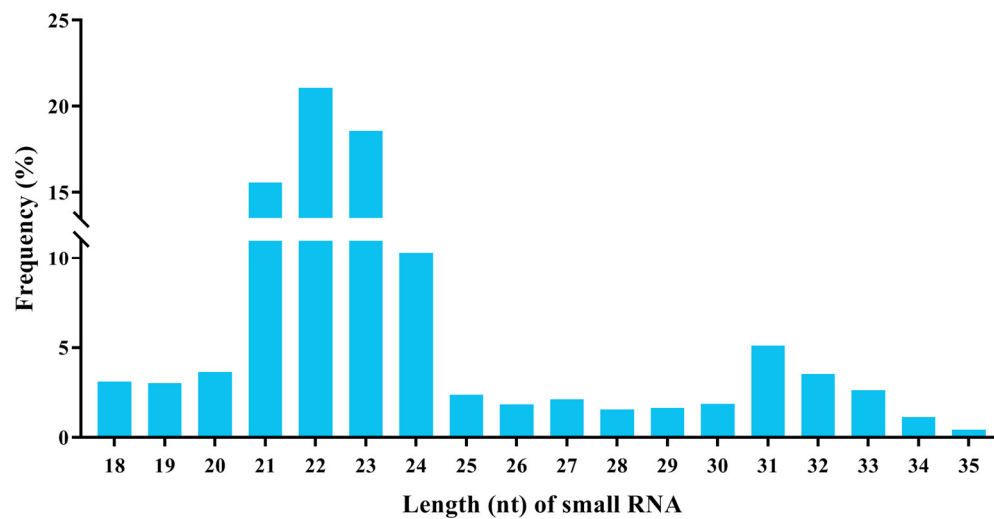

**Figure S1.** The length distributions of sRNA of hair follicles at the anagen and catagen stage.

Supplement: s1 [file s1]
